# Supplementary material for: Comparison of TRIBE and STAMP for identifying targets of RNA binding proteins in human and Drosophila cells
Source: RNA. 2023 Aug;29(8):1230–42. doi: 10.1261/rna.079608.123 (PMC10351885; doi:10.1261/rna.079608.123)
Supplement: Supplemental Material [file supp_079608.123_Supplemental_Data_1_.xlsx]

## Sheet: 1-TDP_43_ADAR replicate 1
Chr	Start coordinate	End coordinate	Editing percentage	Concatenation of editing percentage and reads	Chr name	Edit coordinate	Name	Type	A count	T count	C count	G count	Total nt count	A count from wtRNA	T count from WT RNA	C count from WT RNA	G count from WT RNA	Total count from WT RNA	Editbase count	Total nt count	Editbase count from WT RNA	Total nt count from WT Rna	Identifier
chr5	150446921	150446921	8.9	8.9%_1733r	chr5	150446921	RPS14	EXON	1	1577	155	0	1733	0	1327	0	0	1327	155	1733	0	1327	chr5_150446921
chr5	150446931	150446931	19.4	19.4%_1650r	chr5	150446931	RPS14	EXON	1	1326	320	3	1650	2	1283	0	0	1285	320	1650	0	1285	chr5_150446931
chr5	10254682	10254682	11.5	11.5%_550r	chr5	10254682	CCT5	EXON	487	0	0	63	550	513	0	0	0	513	63	550	0	513	chr5_10254682
chr5	10264718	10264718	6.5	6.5%_569r	chr5	10264718	CCT5	EXON	531	0	1	37	569	521	1	0	0	522	37	569	0	522	chr5_10264718
chr5	10264891	10264891	6.1	6.1%_555r	chr5	10264891	CCT5	EXON	521	0	0	34	555	503	0	0	0	503	34	555	0	503	chr5_10264891
chr5	10265036	10265036	6.8	6.8%_103r	chr5	10265036	CCT5	EXON	96	0	0	7	103	83	0	0	0	83	7	103	0	83	chr5_10265036
chr5	10265548	10265548	15	15.0%_20r	chr5	10265548	CCT5	EXON	17	0	0	3	20	10	0	0	0	10	3	20	0	10	chr5_10265548
chr5	177304768	177304768	8.8	8.8%_1110r	chr5	177304768	PRELID1	EXON	1011	1	0	98	1110	1030	0	0	0	1030	98	1110	0	1030	chr5_177304768
chr5	52800749	52800749	10.3	10.3%_107r	chr5	52800749	PELO	EXON	96	0	0	11	107	70	0	0	0	70	11	107	0	70	chr5_52800749
chr5	75381087	75381087	8.8	8.8%_34r	chr5	75381087	CERT1	EXON	0	31	3	0	34	0	27	0	0	27	3	34	0	27	chr5_75381087
chr5	75381114	75381114	8	8.0%_25r	chr5	75381114	CERT1	EXON	0	23	2	0	25	0	18	0	0	18	2	25	0	18	chr5_75381114
chr5	75426456	75426456	21.9	21.9%_32r	chr5	75426456	CERT1	EXON	0	25	7	0	32	0	23	0	0	23	7	32	0	23	chr5_75426456
chr5	34908808	34908808	8.6	8.6%_70r	chr5	34908808	RAD1	EXON	0	64	6	0	70	0	44	0	0	44	6	70	0	44	chr5_34908808
chr5	73552798	73552798	23.8	23.8%_21r	chr5	73552798	ANKRA2	EXON	0	16	5	0	21	0	18	0	0	18	5	21	0	18	chr5_73552798
chr5	73553409	73553409	28.6	28.6%_21r	chr5	73553409	ANKRA2	EXON	0	15	6	0	21	0	25	0	0	25	6	21	0	25	chr5_73553409
chr5	73565301	73565301	9.1	9.1%_22r	chr5	73565301	ANKRA2	EXON	0	20	2	0	22	0	24	0	0	24	2	22	0	24	chr5_73565301
chr5	110739160	110739160	20.8	20.8%_24r	chr5	110739160	SLC25A46	EXON	19	0	0	5	24	23	0	0	0	23	5	24	0	23	chr5_110739160
chr5	110739280	110739280	7.3	7.3%_41r	chr5	110739280	SLC25A46	EXON	38	0	0	3	41	14	0	0	0	14	3	41	0	14	chr5_110739280
chr5	110746291	110746291	7.7	7.7%_104r	chr5	110746291	SLC25A46	EXON	96	0	0	8	104	83	0	0	0	83	8	104	0	83	chr5_110746291
chr5	110756738	110756738	6.8	6.8%_74r	chr5	110756738	SLC25A46	EXON	69	0	0	5	74	63	0	0	0	63	5	74	0	63	chr5_110756738
chr5	110761225	110761225	16.2	16.2%_117r	chr5	110761225	SLC25A46	EXON	97	0	1	19	117	70	0	0	0	70	19	117	0	70	chr5_110761225
chr5	110761248	110761248	31.3	31.3%_115r	chr5	110761248	SLC25A46	EXON	79	0	0	36	115	93	0	0	0	93	36	115	0	93	chr5_110761248
chr5	110761261	110761261	10.5	10.5%_105r	chr5	110761261	SLC25A46	EXON	94	0	0	11	105	95	0	0	0	95	11	105	0	95	chr5_110761261
chr5	110761595	110761595	6.3	6.3%_95r	chr5	110761595	SLC25A46	EXON	88	1	0	6	95	85	0	0	0	85	6	95	0	85	chr5_110761595
chr5	110761599	110761599	15.4	15.4%_91r	chr5	110761599	SLC25A46	EXON	77	0	0	14	91	82	0	0	0	82	14	91	0	82	chr5_110761599
chr5	110761741	110761741	36.6	36.6%_71r	chr5	110761741	SLC25A46	EXON	45	0	0	26	71	44	0	0	0	44	26	71	0	44	chr5_110761741
chr5	110761759	110761759	13.3	13.3%_75r	chr5	110761759	SLC25A46	EXON	65	0	0	10	75	60	0	0	0	60	10	75	0	60	chr5_110761759
chr5	110761840	110761840	8.2	8.2%_61r	chr5	110761840	SLC25A46	EXON	56	0	0	5	61	41	0	0	0	41	5	61	0	41	chr5_110761840
chr5	110762294	110762294	7.3	7.3%_82r	chr5	110762294	SLC25A46	EXON	76	0	0	6	82	34	0	0	0	34	6	82	0	34	chr5_110762294
chr5	110762564	110762564	6	6.0%_50r	chr5	110762564	SLC25A46	EXON	47	0	0	3	50	43	0	0	0	43	3	50	0	43	chr5_110762564
chr5	110762590	110762590	10.6	10.6%_66r	chr5	110762590	SLC25A46	EXON	59	0	0	7	66	67	0	0	0	67	7	66	0	67	chr5_110762590
chr5	110762610	110762610	8.5	8.5%_71r	chr5	110762610	SLC25A46	EXON	65	0	0	6	71	43	0	0	0	43	6	71	0	43	chr5_110762610
chr5	110763005	110763005	11.5	11.5%_26r	chr5	110763005	SLC25A46	EXON	23	0	0	3	26	24	0	0	0	24	3	26	0	24	chr5_110763005
chr5	110763275	110763275	7.4	7.4%_27r	chr5	110763275	SLC25A46	EXON	25	0	0	2	27	20	0	0	0	20	2	27	0	20	chr5_110763275
chr5	110763312	110763312	9.7	9.7%_31r	chr5	110763312	SLC25A46	EXON	28	0	0	3	31	14	0	0	0	14	3	31	0	14	chr5_110763312
chr5	110763362	110763362	15	15.0%_20r	chr5	110763362	SLC25A46	EXON	17	0	0	3	20	13	0	0	0	13	3	20	0	13	chr5_110763362
chr5	110764633	110764633	6.1	6.1%_33r	chr5	110764633	SLC25A46	EXON	31	0	0	2	33	26	0	0	0	26	2	33	0	26	chr5_110764633
chr5	110764653	110764653	12.2	12.2%_41r	chr5	110764653	SLC25A46	EXON	36	0	0	5	41	30	0	0	0	30	5	41	0	30	chr5_110764653
chr5	110764965	110764965	15	15.0%_20r	chr5	110764965	SLC25A46	EXON	17	0	0	3	20	10	0	0	0	10	3	20	0	10	chr5_110764965
chr5	128188983	128188983	6.1	6.1%_33r	chr5	128188983	SLC12A2	EXON	31	0	0	2	33	39	0	0	0	39	2	33	0	39	chr5_128188983
chr5	43174632	43174632	7.7	7.7%_26r	chr5	43174632	ZNF131	EXON	24	0	0	2	26	20	0	0	0	20	2	26	0	20	chr5_43174632
chr5	43174653	43174653	8	8.0%_25r	chr5	43174653	ZNF131	EXON	23	0	0	2	25	20	0	0	0	20	2	25	0	20	chr5_43174653
chr5	43175432	43175432	14.3	14.3%_21r	chr5	43175432	ZNF131	EXON	18	0	0	3	21	15	0	0	0	15	3	21	0	15	chr5_43175432
chr5	132875631	132875631	27.6	27.6%_29r	chr5	132875631	AFF4	EXON	0	21	8	0	29	0	29	0	0	29	8	29	0	29	chr5_132875631
chr5	132897090	132897090	11.4	11.4%_44r	chr5	132897090	AFF4	EXON	0	39	5	0	44	0	25	0	0	25	5	44	0	25	chr5_132897090
chr5	132899114	132899114	13	13.0%_23r	chr5	132899114	AFF4	EXON	0	20	3	0	23	0	25	0	0	25	3	23	0	25	chr5_132899114
chr5	132963277	132963277	7.1	7.1%_28r	chr5	132963277	AFF4	EXON	0	26	2	0	28	0	27	0	0	27	2	28	0	27	chr5_132963277
chr5	134388350	134388350	57.2	57.2%_250r	chr5	134388350	UBE2B	EXON	107	0	0	143	250	204	0	0	0	204	143	250	0	204	chr5_134388350
chr5	134389949	134389949	10	10.0%_20r	chr5	134389949	UBE2B	INTRON	18	0	0	2	20	11	0	0	0	11	2	20	0	11	chr5_134389949
chr5	134390181	134390181	8.7	8.7%_23r	chr5	134390181	UBE2B	INTRON	21	0	0	2	23	19	0	0	0	19	2	23	0	19	chr5_134390181
chr5	134390825	134390825	9.1	9.1%_33r	chr5	134390825	UBE2B	EXON	30	0	0	3	33	15	0	0	0	15	3	33	0	15	chr5_134390825
chr5	177135982	177135982	28.6	28.6%_28r	chr5	177135982	NSD1	EXON	20	0	0	8	28	29	0	0	0	29	8	28	0	29	chr5_177135982
chr5	177210805	177210805	9.5	9.5%_21r	chr5	177210805	NSD1	EXON	19	0	0	2	21	17	0	1	0	18	2	21	0	18	chr5_177210805
chr5	177210913	177210913	7.1	7.1%_28r	chr5	177210913	NSD1	EXON	26	0	0	2	28	17	0	0	0	17	2	28	0	17	chr5_177210913
chr5	177211360	177211360	18.2	18.2%_22r	chr5	177211360	NSD1	EXON	18	0	0	4	22	21	0	0	0	21	4	22	0	21	chr5_177211360
chr5	177260102	177260102	18.2	18.2%_22r	chr5	177260102	NSD1	EXON	18	0	0	4	22	15	0	0	0	15	4	22	0	15	chr5_177260102
chr5	177282500	177282500	7.1	7.1%_28r	chr5	177282500	NSD1	EXON	26	0	0	2	28	23	0	0	0	23	2	28	0	23	chr5_177282500
chr5	177283924	177283924	15	15.0%_20r	chr5	177283924	NSD1	EXON	17	0	0	3	20	15	0	0	0	15	3	20	0	15	chr5_177283924
chr5	151028120	151028120	10.1	10.1%_158r	chr5	151028120	GPX3	EXON	142	0	0	16	158	142	0	0	0	142	16	158	0	142	chr5_151028120
chr5	151028259	151028259	6.3	6.3%_158r	chr5	151028259	GPX3	EXON	148	0	0	10	158	153	0	0	0	153	10	158	0	153	chr5_151028259
chr5	151028261	151028261	9.3	9.3%_150r	chr5	151028261	GPX3	EXON	136	0	0	14	150	152	0	0	0	152	14	150	0	152	chr5_151028261
chr5	151028262	151028262	50	50.0%_150r	chr5	151028262	GPX3	EXON	75	0	0	75	150	159	0	0	0	159	75	150	0	159	chr5_151028262
chr5	151028263	151028263	36.5	36.5%_156r	chr5	151028263	GPX3	EXON	99	0	0	57	156	163	0	0	0	163	57	156	0	163	chr5_151028263
chr5	151028285	151028285	8	8.0%_174r	chr5	151028285	GPX3	EXON	160	0	0	14	174	164	0	0	0	164	14	174	0	164	chr5_151028285
chr5	151028291	151028291	7.4	7.4%_162r	chr5	151028291	GPX3	EXON	150	0	0	12	162	154	0	0	0	154	12	162	0	154	chr5_151028291
chr5	151028327	151028327	75	75.0%_172r	chr5	151028327	GPX3	EXON	43	0	0	129	172	163	0	0	0	163	129	172	0	163	chr5_151028327
chr5	151028335	151028335	26.1	26.1%_218r	chr5	151028335	GPX3	EXON	161	0	0	57	218	202	0	0	0	202	57	218	0	202	chr5_151028335
chr5	151028385	151028385	7.1	7.1%_183r	chr5	151028385	GPX3	EXON	170	0	0	13	183	129	0	0	0	129	13	183	0	129	chr5_151028385
chr5	55936718	55936718	6.1	6.1%_33r	chr5	55936718	IL6ST	EXON	0	31	2	0	33	0	29	0	0	29	2	33	0	29	chr5_55936718
chr5	55936810	55936810	9.3	9.3%_54r	chr5	55936810	IL6ST	EXON	0	49	5	0	54	0	32	0	0	32	5	54	0	32	chr5_55936810
chr5	55936950	55936950	9.3	9.3%_43r	chr5	55936950	IL6ST	EXON	0	39	4	0	43	0	29	0	0	29	4	43	0	29	chr5_55936950
chr5	55937008	55937008	18.2	18.2%_22r	chr5	55937008	IL6ST	EXON	0	18	4	0	22	0	25	0	0	25	4	22	0	25	chr5_55937008
chr5	55937031	55937031	15.2	15.2%_33r	chr5	55937031	IL6ST	EXON	0	28	5	0	33	0	23	0	0	23	5	33	0	23	chr5_55937031
chr5	55937049	55937049	8.6	8.6%_35r	chr5	55937049	IL6ST	EXON	0	32	3	0	35	0	18	0	0	18	3	35	0	18	chr5_55937049
chr5	55937088	55937088	20.8	20.8%_24r	chr5	55937088	IL6ST	EXON	0	19	5	0	24	0	20	0	0	20	5	24	0	20	chr5_55937088
chr5	55940680	55940680	10	10.0%_20r	chr5	55940680	IL6ST	EXON	0	18	2	0	20	0	11	0	0	11	2	20	0	11	chr5_55940680
chr5	55951554	55951554	12	12.0%_25r	chr5	55951554	IL6ST	EXON	0	22	3	0	25	0	25	0	0	25	3	25	0	25	chr5_55951554
chr5	55956050	55956050	8.3	8.3%_24r	chr5	55956050	IL6ST	EXON	0	22	2	0	24	0	28	0	0	28	2	24	0	28	chr5_55956050
chr5	55960449	55960449	50	50.0%_22r	chr5	55960449	IL6ST	EXON	0	11	11	0	22	0	34	0	0	34	11	22	0	34	chr5_55960449
chr5	55960515	55960515	6.1	6.1%_33r	chr5	55960515	IL6ST	EXON	0	31	2	0	33	0	31	0	0	31	2	33	0	31	chr5_55960515
chr5	55964219	55964219	13.6	13.6%_22r	chr5	55964219	IL6ST	EXON	0	19	3	0	22	0	28	0	0	28	3	22	0	28	chr5_55964219
chr5	179963491	179963491	6.9	6.9%_58r	chr5	179963491	RNF130	EXON	0	54	4	0	58	0	49	0	0	49	4	58	0	49	chr5_179963491
chr5	171861766	171861766	21.7	21.7%_60r	chr5	171861766	FBXW11	EXON	0	47	13	0	60	0	33	0	0	33	13	60	0	33	chr5_171861766
chr5	171861864	171861864	19.7	19.7%_61r	chr5	171861864	FBXW11	EXON	0	49	12	0	61	0	39	0	0	39	12	61	0	39	chr5_171861864
chr5	171861965	171861965	7.9	7.9%_38r	chr5	171861965	FBXW11	EXON	0	35	3	0	38	0	25	0	0	25	3	38	0	25	chr5_171861965
chr5	171861996	171861996	20	20.0%_45r	chr5	171861996	FBXW11	EXON	0	36	9	0	45	0	32	0	0	32	9	45	0	32	chr5_171861996
chr5	171862018	171862018	6.6	6.6%_61r	chr5	171862018	FBXW11	EXON	0	57	4	0	61	0	40	0	0	40	4	61	0	40	chr5_171862018
chr5	171862524	171862524	15.9	15.9%_44r	chr5	171862524	FBXW11	EXON	0	37	7	0	44	0	43	0	0	43	7	44	0	43	chr5_171862524
chr5	171862528	171862528	11.8	11.8%_51r	chr5	171862528	FBXW11	EXON	0	45	6	0	51	0	47	0	0	47	6	51	0	47	chr5_171862528
chr5	171862534	171862534	25	25.0%_52r	chr5	171862534	FBXW11	EXON	0	39	13	0	52	0	38	0	0	38	13	52	0	38	chr5_171862534
chr5	171862535	171862535	7.7	7.7%_52r	chr5	171862535	FBXW11	EXON	0	48	4	0	52	0	40	0	0	40	4	52	0	40	chr5_171862535
chr5	171862674	171862674	13.3	13.3%_45r	chr5	171862674	FBXW11	EXON	0	39	6	0	45	0	45	0	0	45	6	45	0	45	chr5_171862674
chr5	171862682	171862682	7.7	7.7%_39r	chr5	171862682	FBXW11	EXON	0	36	3	0	39	0	49	0	0	49	3	39	0	49	chr5_171862682
chr5	171862683	171862683	9.8	9.8%_41r	chr5	171862683	FBXW11	EXON	0	37	4	0	41	0	50	0	0	50	4	41	0	50	chr5_171862683
chr5	171862765	171862765	43.8	43.8%_32r	chr5	171862765	FBXW11	EXON	1	17	14	0	32	1	54	0	0	55	14	32	0	55	chr5_171862765
chr5	171862794	171862794	7	7.0%_43r	chr5	171862794	FBXW11	EXON	0	40	3	0	43	0	50	0	0	50	3	43	0	50	chr5_171862794
chr5	171862995	171862995	8.9	8.9%_45r	chr5	171862995	FBXW11	EXON	0	41	4	0	45	0	40	0	0	40	4	45	0	40	chr5_171862995
chr5	171863220	171863220	12	12.0%_50r	chr5	171863220	FBXW11	EXON	0	44	6	0	50	0	33	0	0	33	6	50	0	33	chr5_171863220
chr5	171863249	171863249	18.2	18.2%_44r	chr5	171863249	FBXW11	EXON	0	36	8	0	44	0	32	0	0	32	8	44	0	32	chr5_171863249
chr5	171863606	171863606	7.1	7.1%_42r	chr5	171863606	FBXW11	EXON	0	39	3	0	42	0	39	0	0	39	3	42	0	39	chr5_171863606
chr5	171863609	171863609	6.7	6.7%_45r	chr5	171863609	FBXW11	EXON	0	42	3	0	45	0	37	0	0	37	3	45	0	37	chr5_171863609
chr5	171863662	171863662	30	30.0%_30r	chr5	171863662	FBXW11	EXON	0	21	9	0	30	0	24	0	0	24	9	30	0	24	chr5_171863662
chr5	171863680	171863680	19.2	19.2%_26r	chr5	171863680	FBXW11	EXON	0	21	5	0	26	0	24	0	0	24	5	26	0	24	chr5_171863680
chr5	171863998	171863998	6.7	6.7%_30r	chr5	171863998	FBXW11	EXON	0	28	2	0	30	0	32	0	0	32	2	30	0	32	chr5_171863998
chr5	171864000	171864000	6.9	6.9%_29r	chr5	171864000	FBXW11	EXON	0	27	2	0	29	0	28	0	0	28	2	29	0	28	chr5_171864000
chr5	171864011	171864011	68.2	68.2%_22r	chr5	171864011	FBXW11	EXON	0	7	15	0	22	0	36	0	0	36	15	22	0	36	chr5_171864011
chr5	171868684	171868684	7.4	7.4%_54r	chr5	171868684	FBXW11	EXON	0	50	4	0	54	0	42	0	0	42	4	54	0	42	chr5_171868684
chr5	171872897	171872897	44.3	44.3%_61r	chr5	171872897	FBXW11	EXON	0	34	27	0	61	0	59	0	0	59	27	61	0	59	chr5_171872897
chr5	171872917	171872917	8.3	8.3%_72r	chr5	171872917	FBXW11	EXON	0	66	6	0	72	0	79	0	0	79	6	72	0	79	chr5_171872917
chr5	171872957	171872957	38.9	38.9%_36r	chr5	171872957	FBXW11	EXON	0	22	14	0	36	0	44	0	0	44	14	36	0	44	chr5_171872957
chr5	171872981	171872981	13.8	13.8%_29r	chr5	171872981	FBXW11	EXON	0	25	4	0	29	0	35	0	0	35	4	29	0	35	chr5_171872981
chr5	171878018	171878018	7.8	7.8%_51r	chr5	171878018	FBXW11	EXON	0	47	4	0	51	0	40	0	0	40	4	51	0	40	chr5_171878018
chr5	171899039	171899039	7	7.0%_57r	chr5	171899039	FBXW11	EXON	0	53	4	0	57	0	52	0	0	52	4	57	0	52	chr5_171899039
chr5	171899086	171899086	20	20.0%_35r	chr5	171899086	FBXW11	EXON	0	28	7	0	35	0	53	0	1	54	7	35	0	54	chr5_171899086
chr5	171900018	171900018	33.3	33.3%_45r	chr5	171900018	FBXW11	EXON	0	30	15	0	45	0	52	0	0	52	15	45	0	52	chr5_171900018
chr5	171910747	171910747	7.5	7.5%_40r	chr5	171910747	FBXW11	EXON	0	37	3	0	40	0	31	0	0	31	3	40	0	31	chr5_171910747
chr5	131159386	131159386	38.4	38.4%_972r	chr5	131159386	HINT1	EXON	2	597	373	0	972	1	957	0	0	958	373	972	0	958	chr5_131159386
chr5	131165122	131165122	11.9	11.9%_548r	chr5	131165122	HINT1	EXON	0	483	65	0	548	0	484	0	1	485	65	548	0	485	chr5_131165122
chr5	80627451	80627451	6.7	6.7%_30r	chr5	80627451	DHFR	EXON	0	28	2	0	30	0	36	0	0	36	2	30	0	36	chr5_80627451
chr5	80627502	80627502	8.7	8.7%_46r	chr5	80627502	DHFR	EXON	1	41	4	0	46	0	54	0	0	54	4	46	0	54	chr5_80627502
chr5	80627559	80627559	9.1	9.1%_33r	chr5	80627559	DHFR	EXON	0	30	3	0	33	0	24	0	0	24	3	33	0	24	chr5_80627559
chr5	80627627	80627627	12.9	12.9%_31r	chr5	80627627	DHFR	EXON	0	27	4	0	31	0	33	0	0	33	4	31	0	33	chr5_80627627
chr5	80627889	80627889	11.8	11.8%_34r	chr5	80627889	DHFR	EXON	0	30	4	0	34	0	36	0	0	36	4	34	0	36	chr5_80627889
chr5	80628054	80628054	8.2	8.2%_49r	chr5	80628054	DHFR	EXON	0	45	4	0	49	0	53	0	0	53	4	49	0	53	chr5_80628054
chr5	80628093	80628093	14.3	14.3%_42r	chr5	80628093	DHFR	EXON	0	36	6	0	42	0	57	0	0	57	6	42	0	57	chr5_80628093
chr5	80628538	80628538	8	8.0%_25r	chr5	80628538	DHFR	EXON	0	23	2	0	25	0	19	0	0	19	2	25	0	19	chr5_80628538
chr5	80637907	80637907	25.7	25.7%_35r	chr5	80637907	DHFR	EXON	0	26	9	0	35	0	44	0	0	44	9	35	0	44	chr5_80637907
chr5	133972005	133972005	8.4	8.4%_285r	chr5	133972005	VDAC1	EXON	0	261	24	0	285	0	264	0	0	264	24	285	0	264	chr5_133972005
chr5	133972019	133972019	8.2	8.2%_219r	chr5	133972019	VDAC1	EXON	0	201	18	0	219	0	226	0	0	226	18	219	0	226	chr5_133972019
chr5	133972052	133972052	72.4	72.4%_116r	chr5	133972052	VDAC1	EXON	0	32	84	0	116	0	226	0	0	226	84	116	0	226	chr5_133972052
chr5	133972081	133972081	7.9	7.9%_278r	chr5	133972081	VDAC1	EXON	1	254	22	1	278	0	240	0	0	240	22	278	0	240	chr5_133972081
chr5	133972334	133972334	11.4	11.4%_245r	chr5	133972334	VDAC1	EXON	0	217	28	0	245	0	253	0	0	253	28	245	0	253	chr5_133972334
chr5	133972340	133972340	18	18.0%_272r	chr5	133972340	VDAC1	EXON	0	223	49	0	272	1	289	0	0	290	49	272	0	290	chr5_133972340
chr5	133972511	133972511	52.5	52.5%_198r	chr5	133972511	VDAC1	EXON	0	94	104	0	198	0	181	0	0	181	104	198	0	181	chr5_133972511
chr5	133972535	133972535	19	19.0%_184r	chr5	133972535	VDAC1	EXON	0	149	35	0	184	0	164	0	0	164	35	184	0	164	chr5_133972535
chr5	133972581	133972581	14.3	14.3%_182r	chr5	133972581	VDAC1	EXON	1	155	26	0	182	1	194	0	0	195	26	182	0	195	chr5_133972581
chr5	133972583	133972583	7.3	7.3%_193r	chr5	133972583	VDAC1	EXON	0	179	14	0	193	0	211	0	0	211	14	193	0	211	chr5_133972583
chr5	133972596	133972596	15.6	15.6%_192r	chr5	133972596	VDAC1	EXON	0	162	30	0	192	0	228	0	0	228	30	192	0	228	chr5_133972596
chr5	133972644	133972644	7.9	7.9%_216r	chr5	133972644	VDAC1	EXON	0	199	17	0	216	0	234	0	0	234	17	216	0	234	chr5_133972644
chr5	133972666	133972666	7.2	7.2%_250r	chr5	133972666	VDAC1	EXON	0	232	18	0	250	0	260	0	0	260	18	250	0	260	chr5_133972666
chr5	133972697	133972697	10.2	10.2%_235r	chr5	133972697	VDAC1	EXON	1	210	24	0	235	1	253	0	0	254	24	235	0	254	chr5_133972697
chr5	133972709	133972709	6.5	6.5%_184r	chr5	133972709	VDAC1	EXON	0	172	12	0	184	0	186	0	0	186	12	184	0	186	chr5_133972709
chr5	133972713	133972713	9.1	9.1%_175r	chr5	133972713	VDAC1	EXON	2	157	16	0	175	0	187	0	0	187	16	175	0	187	chr5_133972713
chr5	133972716	133972716	7.1	7.1%_168r	chr5	133972716	VDAC1	EXON	0	156	12	0	168	0	182	0	0	182	12	168	0	182	chr5_133972716
chr5	133972728	133972728	8.2	8.2%_134r	chr5	133972728	VDAC1	EXON	0	123	11	0	134	0	139	0	0	139	11	134	0	139	chr5_133972728
chr5	133972764	133972764	10.1	10.1%_149r	chr5	133972764	VDAC1	EXON	0	134	15	0	149	0	139	0	0	139	15	149	0	139	chr5_133972764
chr5	133972792	133972792	9.6	9.6%_94r	chr5	133972792	VDAC1	EXON	0	85	9	0	94	0	102	0	0	102	9	94	0	102	chr5_133972792
chr5	133973798	133973798	13.4	13.4%_269r	chr5	133973798	VDAC1	EXON	0	233	36	0	269	0	234	0	0	234	36	269	0	234	chr5_133973798
chr5	133973845	133973845	8.5	8.5%_94r	chr5	133973845	VDAC1	EXON	0	86	8	0	94	0	89	0	0	89	8	94	0	89	chr5_133973845
chr5	133975899	133975899	13.9	13.9%_101r	chr5	133975899	VDAC1	EXON	0	87	14	0	101	0	116	0	0	116	14	101	0	116	chr5_133975899
chr5	180233679	180233679	9.1	9.1%_22r	chr5	180233679	MAPK9	EXON	0	20	2	0	22	0	18	0	0	18	2	22	0	18	chr5_180233679
chr5	180233732	180233732	6.2	6.2%_32r	chr5	180233732	MAPK9	EXON	0	30	2	0	32	0	21	0	0	21	2	32	0	21	chr5_180233732
chr5	180233846	180233846	31.8	31.8%_22r	chr5	180233846	MAPK9	EXON	0	15	7	0	22	0	29	0	0	29	7	22	0	29	chr5_180233846
chr5	180235910	180235910	9.5	9.5%_21r	chr5	180235910	MAPK9	EXON	0	19	2	0	21	0	14	0	0	14	2	21	0	14	chr5_180235910
chr5	180235965	180235965	10.3	10.3%_29r	chr5	180235965	MAPK9	EXON	0	26	3	0	29	0	16	0	0	16	3	29	0	16	chr5_180235965
chr5	180236128	180236128	6.2	6.2%_32r	chr5	180236128	MAPK9	EXON	0	30	2	0	32	0	13	0	0	13	2	32	0	13	chr5_180236128
chr5	180236145	180236145	9.7	9.7%_31r	chr5	180236145	MAPK9	EXON	0	28	3	0	31	0	16	0	0	16	3	31	0	16	chr5_180236145
chr5	180236155	180236155	10.7	10.7%_28r	chr5	180236155	MAPK9	EXON	0	25	3	0	28	0	15	0	0	15	3	28	0	15	chr5_180236155
chr5	180236239	180236239	40.9	40.9%_22r	chr5	180236239	MAPK9	EXON	0	13	9	0	22	0	21	0	0	21	9	22	0	21	chr5_180236239
chr5	180236252	180236252	17.9	17.9%_28r	chr5	180236252	MAPK9	EXON	0	23	5	0	28	0	25	0	0	25	5	28	0	25	chr5_180236252
chr5	159275229	159275229	6.7	6.7%_164r	chr5	159275229	UBLCP1	EXON	153	0	0	11	164	110	0	1	0	111	11	164	0	111	chr5_159275229
chr5	159285608	159285608	24.4	24.4%_41r	chr5	159285608	UBLCP1	EXON	31	0	0	10	41	24	0	0	0	24	10	41	0	24	chr5_159285608
chr5	74721405	74721405	8.5	8.5%_71r	chr5	74721405	GFM2	EXON	0	65	6	0	71	0	49	0	0	49	6	71	0	49	chr5_74721405
chr5	74726055	74726055	9.2	9.2%_76r	chr5	74726055	GFM2	EXON	0	69	7	0	76	0	43	0	0	43	7	76	0	43	chr5_74726055
chr5	74733050	74733050	17.2	17.2%_64r	chr5	74733050	GFM2	EXON	0	53	11	0	64	0	63	0	0	63	11	64	0	63	chr5_74733050
chr5	74736891	74736891	16.4	16.4%_55r	chr5	74736891	GFM2	EXON	0	46	9	0	55	0	54	0	0	54	9	55	0	54	chr5_74736891
chr5	74738346	74738346	7.5	7.5%_67r	chr5	74738346	GFM2	EXON	0	62	5	0	67	0	74	0	0	74	5	67	0	74	chr5_74738346
chr5	74738566	74738566	24.1	24.1%_54r	chr5	74738566	GFM2	EXON	0	41	13	0	54	0	52	0	0	52	13	54	0	52	chr5_74738566
chr5	74745828	74745828	10.5	10.5%_76r	chr5	74745828	GFM2	EXON	1	67	8	0	76	0	69	0	0	69	8	76	0	69	chr5_74745828
chr5	169588479	169588479	14.4	14.4%_104r	chr5	169588479	SPDL1	EXON	89	0	0	15	104	64	0	0	0	64	15	104	0	64	chr5_169588479
chr5	169588482	169588482	13.6	13.6%_118r	chr5	169588482	SPDL1	EXON	102	0	0	16	118	76	0	0	0	76	16	118	0	76	chr5_169588482
chr5	169593393	169593393	13.5	13.5%_104r	chr5	169593393	SPDL1	EXON	90	0	0	14	104	108	0	0	0	108	14	104	0	108	chr5_169593393
chr5	169593419	169593419	7	7.0%_129r	chr5	169593419	SPDL1	EXON	120	0	0	9	129	116	0	0	0	116	9	129	0	116	chr5_169593419
chr5	169593517	169593517	14.9	14.9%_141r	chr5	169593517	SPDL1	EXON	120	0	0	21	141	103	0	0	0	103	21	141	0	103	chr5_169593517
chr5	169594426	169594426	6.4	6.4%_171r	chr5	169594426	SPDL1	EXON	160	0	0	11	171	130	0	0	0	130	11	171	0	130	chr5_169594426
chr5	169594636	169594636	16.7	16.7%_162r	chr5	169594636	SPDL1	EXON	135	0	0	27	162	146	0	0	0	146	27	162	0	146	chr5_169594636
chr5	169596616	169596616	19.6	19.6%_107r	chr5	169596616	SPDL1	EXON	86	0	0	21	107	74	0	0	0	74	21	107	0	74	chr5_169596616
chr5	169598991	169598991	31	31.0%_126r	chr5	169598991	SPDL1	EXON	87	0	0	39	126	117	0	0	0	117	39	126	0	117	chr5_169598991
chr5	169604249	169604249	15	15.0%_187r	chr5	169604249	SPDL1	EXON	159	0	0	28	187	112	0	0	0	112	28	187	0	112	chr5_169604249
chr5	103276002	103276002	30.4	30.4%_23r	chr5	103276002	MACIR	EXON	16	0	0	7	23	27	0	0	0	27	7	23	0	27	chr5_103276002
chr5	103276192	103276192	7.3	7.3%_41r	chr5	103276192	MACIR	EXON	38	0	0	3	41	36	0	0	0	36	3	41	0	36	chr5_103276192
chr5	103276207	103276207	14.8	14.8%_27r	chr5	103276207	MACIR	EXON	23	0	0	4	27	32	1	0	0	33	4	27	0	33	chr5_103276207
chr5	103276526	103276526	18.9	18.9%_37r	chr5	103276526	MACIR	EXON	30	0	0	7	37	30	0	0	0	30	7	37	0	30	chr5_103276526
chr5	103277503	103277503	20.8	20.8%_24r	chr5	103277503	MACIR	EXON	19	0	0	5	24	21	0	1	0	22	5	24	0	22	chr5_103277503
chr5	103278095	103278095	7.4	7.4%_27r	chr5	103278095	MACIR	EXON	25	0	0	2	27	22	0	0	0	22	2	27	0	22	chr5_103278095
chr5	103278102	103278102	7.4	7.4%_27r	chr5	103278102	MACIR	EXON	25	0	0	2	27	24	0	0	0	24	2	27	0	24	chr5_103278102
chr5	177457401	177457401	17	17.0%_100r	chr5	177457401	DBN1	EXON	0	83	17	0	100	0	89	0	1	90	17	100	0	90	chr5_177457401
chr5	177458592	177458592	9.9	9.9%_71r	chr5	177458592	DBN1	EXON	0	64	7	0	71	0	72	0	0	72	7	71	0	72	chr5_177458592
chr5	177467028	177467028	6.6	6.6%_91r	chr5	177467028	DBN1	EXON	0	85	6	0	91	0	80	0	0	80	6	91	0	80	chr5_177467028
chr5	177468128	177468128	6.7	6.7%_105r	chr5	177468128	DBN1	EXON	0	98	7	0	105	0	86	0	0	86	7	105	0	86	chr5_177468128
chr5	140700869	140700869	14.3	14.3%_35r	chr5	140700869	ZMAT2	EXON	29	0	1	5	35	23	0	0	0	23	5	35	0	23	chr5_140700869
chr5	140704435	140704435	10.9	10.9%_64r	chr5	140704435	ZMAT2	EXON	57	0	0	7	64	63	0	0	0	63	7	64	0	63	chr5_140704435
chr5	140704504	140704504	12.9	12.9%_62r	chr5	140704504	ZMAT2	EXON	54	0	0	8	62	51	0	0	0	51	8	62	0	51	chr5_140704504
chr5	140705626	140705626	6.6	6.6%_61r	chr5	140705626	ZMAT2	EXON	57	0	0	4	61	54	0	0	0	54	4	61	0	54	chr5_140705626
chr5	140705627	140705627	6.8	6.8%_59r	chr5	140705627	ZMAT2	EXON	55	0	0	4	59	51	0	0	0	51	4	59	0	51	chr5_140705627
chr5	140705635	140705635	6.8	6.8%_59r	chr5	140705635	ZMAT2	EXON	55	0	0	4	59	51	0	0	0	51	4	59	0	51	chr5_140705635
chr5	140705853	140705853	14.9	14.9%_47r	chr5	140705853	ZMAT2	EXON	39	1	0	7	47	55	0	0	0	55	7	47	0	55	chr5_140705853
chr5	140705989	140705989	17.1	17.1%_41r	chr5	140705989	ZMAT2	EXON	34	0	0	7	41	42	0	0	0	42	7	41	0	42	chr5_140705989
chr5	140706015	140706015	17.2	17.2%_29r	chr5	140706015	ZMAT2	EXON	24	0	0	5	29	39	0	0	0	39	5	29	0	39	chr5_140706015
chr5	140706021	140706021	7.1	7.1%_28r	chr5	140706021	ZMAT2	EXON	26	0	0	2	28	40	0	0	0	40	2	28	0	40	chr5_140706021
chr5	140706034	140706034	11.8	11.8%_34r	chr5	140706034	ZMAT2	EXON	30	0	0	4	34	34	0	0	0	34	4	34	0	34	chr5_140706034
chr5	140706173	140706173	6.7	6.7%_45r	chr5	140706173	ZMAT2	EXON	42	0	0	3	45	31	0	0	0	31	3	45	0	31	chr5_140706173
chr5	140706232	140706232	10.3	10.3%_68r	chr5	140706232	ZMAT2	EXON	61	0	0	7	68	47	0	0	0	47	7	68	0	47	chr5_140706232
chr5	140706242	140706242	7.4	7.4%_68r	chr5	140706242	ZMAT2	EXON	63	0	0	5	68	46	0	0	0	46	5	68	0	46	chr5_140706242
chr5	140706340	140706340	29.6	29.6%_54r	chr5	140706340	ZMAT2	EXON	38	0	0	16	54	39	0	0	0	39	16	54	0	39	chr5_140706340
chr5	140706342	140706342	66.7	66.7%_54r	chr5	140706342	ZMAT2	EXON	18	0	0	36	54	41	0	0	0	41	36	54	0	41	chr5_140706342
chr5	140706383	140706383	9.8	9.8%_51r	chr5	140706383	ZMAT2	EXON	46	0	0	5	51	35	0	0	0	35	5	51	0	35	chr5_140706383
chr5	140706390	140706390	6.1	6.1%_49r	chr5	140706390	ZMAT2	EXON	46	0	0	3	49	23	0	0	0	23	3	49	0	23	chr5_140706390
chr5	140706391	140706391	7	7.0%_43r	chr5	140706391	ZMAT2	EXON	40	0	0	3	43	22	0	0	0	22	3	43	0	22	chr5_140706391
chr5	140706459	140706459	17.1	17.1%_41r	chr5	140706459	ZMAT2	EXON	34	0	0	7	41	24	0	0	0	24	7	41	0	24	chr5_140706459
chr5	140706512	140706512	6.1	6.1%_49r	chr5	140706512	ZMAT2	EXON	46	0	0	3	49	25	0	0	0	25	3	49	0	25	chr5_140706512
chr5	140706537	140706537	8.3	8.3%_24r	chr5	140706537	ZMAT2	EXON	22	0	0	2	24	12	0	0	0	12	2	24	0	12	chr5_140706537
chr5	1814368	1814368	50	50.0%_244r	chr5	1814368	NDUFS6	EXON	120	0	2	122	244	221	0	0	0	221	122	244	0	221	chr5_1814368
chr5	73503035	73503035	7	7.0%_1090r	chr5	73503035	BTF3	EXON	1011	2	1	76	1090	922	0	1	0	923	76	1090	0	923	chr5_73503035
chr5	176479243	176479243	10.3	10.3%_97r	chr5	176479243	FAF2	EXON	87	0	0	10	97	78	0	0	0	78	10	97	0	78	chr5_176479243
chr5	176508365	176508365	14.5	14.5%_55r	chr5	176508365	FAF2	EXON	47	0	0	8	55	56	0	0	0	56	8	55	0	56	chr5_176508365
chr5	176509784	176509784	40.3	40.3%_62r	chr5	176509784	FAF2	EXON	37	0	0	25	62	30	0	0	0	30	25	62	0	30	chr5_176509784
chr5	113534368	113534368	9.7	9.7%_31r	chr5	113534368	YTHDC2	EXON	28	0	0	3	31	43	0	0	0	43	3	31	0	43	chr5_113534368
chr5	113534371	113534371	18.9	18.9%_37r	chr5	113534371	YTHDC2	EXON	30	0	0	7	37	46	0	0	0	46	7	37	0	46	chr5_113534371
chr5	113535756	113535756	6.7	6.7%_30r	chr5	113535756	YTHDC2	EXON	28	0	0	2	30	40	0	0	0	40	2	30	0	40	chr5_113535756
chr5	113542434	113542434	9.5	9.5%_21r	chr5	113542434	YTHDC2	EXON	19	0	0	2	21	17	0	0	0	17	2	21	0	17	chr5_113542434
chr5	113542448	113542448	9.5	9.5%_21r	chr5	113542448	YTHDC2	EXON	19	0	0	2	21	14	0	0	0	14	2	21	0	14	chr5_113542448
chr5	86620716	86620716	20.6	20.6%_1472r	chr5	86620716	COX7C	EXON	1169	0	0	303	1472	1224	0	0	0	1224	303	1472	0	1224	chr5_86620716
chr5	151464568	151464568	10	10.0%_20r	chr5	151464568	SLC36A1	EXON	18	0	0	2	20	13	0	0	0	13	2	20	0	13	chr5_151464568
chr5	72219614	72219614	6.6	6.6%_137r	chr5	72219614	MRPS27	EXON	0	128	9	0	137	0	120	0	0	120	9	137	0	120	chr5_72219614
chr5	72219747	72219747	16	16.0%_81r	chr5	72219747	MRPS27	EXON	0	68	13	0	81	0	66	0	0	66	13	81	0	66	chr5_72219747
chr5	72219810	72219810	18	18.0%_128r	chr5	72219810	MRPS27	EXON	1	104	23	0	128	0	119	0	0	119	23	128	0	119	chr5_72219810
chr5	72220018	72220018	18.1	18.1%_72r	chr5	72220018	MRPS27	EXON	0	59	13	0	72	0	85	0	0	85	13	72	0	85	chr5_72220018
chr5	72220150	72220150	23.4	23.4%_77r	chr5	72220150	MRPS27	EXON	0	59	18	0	77	0	89	0	0	89	18	77	0	89	chr5_72220150
chr5	72220164	72220164	8.6	8.6%_81r	chr5	72220164	MRPS27	EXON	0	73	7	1	81	0	99	0	0	99	7	81	0	99	chr5_72220164
chr5	72220185	72220185	29.4	29.4%_51r	chr5	72220185	MRPS27	EXON	0	36	15	0	51	0	76	0	0	76	15	51	0	76	chr5_72220185
chr5	72220636	72220636	12	12.0%_75r	chr5	72220636	MRPS27	EXON	0	66	9	0	75	0	80	0	0	80	9	75	0	80	chr5_72220636
chr5	72220769	72220769	16	16.0%_75r	chr5	72220769	MRPS27	EXON	0	63	12	0	75	0	68	0	0	68	12	75	0	68	chr5_72220769
chr5	72220777	72220777	9.6	9.6%_83r	chr5	72220777	MRPS27	EXON	0	75	8	0	83	0	79	0	0	79	8	83	0	79	chr5_72220777
chr5	72220877	72220877	8.5	8.5%_59r	chr5	72220877	MRPS27	EXON	0	54	5	0	59	0	69	0	0	69	5	59	0	69	chr5_72220877
chr5	95467908	95467908	9.3	9.3%_43r	chr5	95467908	TTC37	EXON	0	39	4	0	43	0	55	0	0	55	4	43	0	55	chr5_95467908
chr5	95503917	95503917	10.3	10.3%_29r	chr5	95503917	TTC37	EXON	0	26	3	0	29	0	32	0	0	32	3	29	0	32	chr5_95503917
chr5	95516926	95516926	9.7	9.7%_31r	chr5	95516926	TTC37	EXON	0	28	3	0	31	0	25	0	0	25	3	31	0	25	chr5_95516926
chr5	95517055	95517055	6.2	6.2%_48r	chr5	95517055	TTC37	EXON	0	45	3	0	48	0	45	0	1	46	3	48	0	46	chr5_95517055
chr5	95517314	95517314	11.4	11.4%_44r	chr5	95517314	TTC37	EXON	1	38	5	0	44	0	46	0	0	46	5	44	0	46	chr5_95517314
chr5	95517316	95517316	8.2	8.2%_49r	chr5	95517316	TTC37	EXON	0	45	4	0	49	0	49	0	0	49	4	49	0	49	chr5_95517316
chr5	95520746	95520746	7	7.0%_43r	chr5	95520746	TTC37	EXON	0	40	3	0	43	0	35	0	0	35	3	43	0	35	chr5_95520746
chr5	95520751	95520751	7.3	7.3%_41r	chr5	95520751	TTC37	EXON	0	38	3	0	41	0	30	0	0	30	3	41	0	30	chr5_95520751
chr5	95523238	95523238	6.8	6.8%_44r	chr5	95523238	TTC37	EXON	0	41	3	0	44	0	44	0	0	44	3	44	0	44	chr5_95523238
chr5	95530147	95530147	16.3	16.3%_43r	chr5	95530147	TTC37	EXON	0	36	7	0	43	0	32	0	0	32	7	43	0	32	chr5_95530147
chr5	95536887	95536887	38.5	38.5%_39r	chr5	95536887	TTC37	EXON	0	24	15	0	39	0	33	0	0	33	15	39	0	33	chr5_95536887
chr5	95540786	95540786	18.2	18.2%_33r	chr5	95540786	TTC37	EXON	0	27	6	0	33	0	26	0	0	26	6	33	0	26	chr5_95540786
chr5	62451924	62451924	8.8	8.8%_34r	chr5	62451924	IPO11	EXON	31	0	0	3	34	34	0	0	0	34	3	34	0	34	chr5_62451924
chr5	62494084	62494084	21.2	21.2%_33r	chr5	62494084	IPO11	EXON	26	0	0	7	33	30	0	0	0	30	7	33	0	30	chr5_62494084
chr5	62506289	62506289	12.8	12.8%_39r	chr5	62506289	IPO11	EXON	34	0	0	5	39	30	0	0	0	30	5	39	0	30	chr5_62506289
chr5	62526147	62526147	15.8	15.8%_38r	chr5	62526147	IPO11	EXON	32	0	0	6	38	39	0	0	0	39	6	38	0	39	chr5_62526147
chr5	62526222	62526222	6.1	6.1%_33r	chr5	62526222	IPO11	EXON	31	0	0	2	33	21	0	0	0	21	2	33	0	21	chr5_62526222
chr5	62526230	62526230	18.8	18.8%_32r	chr5	62526230	IPO11	EXON	26	0	0	6	32	23	0	0	0	23	6	32	0	23	chr5_62526230
chr5	62550402	62550402	10	10.0%_30r	chr5	62550402	IPO11	EXON	27	0	0	3	30	21	0	0	0	21	3	30	0	21	chr5_62550402
chr5	62591581	62591581	11.5	11.5%_26r	chr5	62591581	IPO11	EXON	23	0	0	3	26	24	0	0	0	24	3	26	0	24	chr5_62591581
chr5	62627215	62627215	10	10.0%_20r	chr5	62627215	IPO11	EXON	18	0	0	2	20	21	0	0	0	21	2	20	0	21	chr5_62627215
chr5	62627357	62627357	26.1	26.1%_23r	chr5	62627357	IPO11	EXON	17	0	0	6	23	19	0	0	0	19	6	23	0	19	chr5_62627357
chr5	62628337	62628337	10	10.0%_20r	chr5	62628337	IPO11	EXON	18	0	0	2	20	14	0	0	0	14	2	20	0	14	chr5_62628337
chr5	62628338	62628338	10	10.0%_20r	chr5	62628338	IPO11	EXON	18	0	0	2	20	14	0	0	0	14	2	20	0	14	chr5_62628338
chr5	62628348	62628348	9.5	9.5%_21r	chr5	62628348	IPO11	EXON	19	0	0	2	21	17	0	0	0	17	2	21	0	17	chr5_62628348
chr5	62628404	62628404	16.1	16.1%_31r	chr5	62628404	IPO11	EXON	26	0	0	5	31	17	0	0	0	17	5	31	0	17	chr5_62628404
chr5	62628415	62628415	6.5	6.5%_31r	chr5	62628415	IPO11	EXON	28	1	0	2	31	19	0	0	0	19	2	31	0	19	chr5_62628415
chr5	96742747	96742747	8.9	8.9%_45r	chr5	96742747	CAST	EXON	41	0	0	4	45	28	0	0	0	28	4	45	0	28	chr5_96742747
chr5	96748599	96748599	10.7	10.7%_56r	chr5	96748599	CAST	EXON	50	0	0	6	56	32	0	0	0	32	6	56	0	32	chr5_96748599
chr5	96770601	96770601	6	6.0%_50r	chr5	96770601	CAST	EXON	47	0	0	3	50	38	0	0	0	38	3	50	0	38	chr5_96770601
chr5	96772648	96772648	6.8	6.8%_44r	chr5	96772648	CAST	EXON	41	0	0	3	44	39	0	0	0	39	3	44	0	39	chr5_96772648
chr5	96772703	96772703	10.8	10.8%_37r	chr5	96772703	CAST	EXON	33	0	0	4	37	33	0	0	0	33	4	37	0	33	chr5_96772703
chr5	96773354	96773354	25.8	25.8%_31r	chr5	96773354	CAST	EXON	23	0	0	8	31	20	0	0	0	20	8	31	0	20	chr5_96773354
chr5	178138223	178138223	12.1	12.1%_33r	chr5	178138223	RMND5B	EXON	29	0	0	4	33	37	0	0	0	37	4	33	0	37	chr5_178138223
chr5	178142643	178142643	9.3	9.3%_54r	chr5	178142643	RMND5B	EXON	49	0	0	5	54	50	0	0	0	50	5	54	0	50	chr5_178142643
chr5	178142944	178142944	16.3	16.3%_43r	chr5	178142944	RMND5B	EXON	36	0	0	7	43	50	0	0	0	50	7	43	0	50	chr5_178142944
chr5	178144082	178144082	6.5	6.5%_46r	chr5	178144082	RMND5B	EXON	43	0	0	3	46	51	0	1	0	52	3	46	0	52	chr5_178144082
chr5	178148306	178148306	7.4	7.4%_54r	chr5	178148306	RMND5B	EXON	50	0	0	4	54	45	0	0	0	45	4	54	0	45	chr5_178148306
chr5	178148321	178148321	8.3	8.3%_48r	chr5	178148321	RMND5B	EXON	44	0	0	4	48	52	0	0	0	52	4	48	0	52	chr5_178148321
chr5	178148328	178148328	19	19.0%_42r	chr5	178148328	RMND5B	EXON	34	0	0	8	42	46	0	0	0	46	8	42	0	46	chr5_178148328
chr5	178148378	178148378	14.3	14.3%_49r	chr5	178148378	RMND5B	EXON	42	0	0	7	49	49	0	0	0	49	7	49	0	49	chr5_178148378
chr5	65567567	65567567	9.2	9.2%_76r	chr5	65567567	PPWD1	EXON	69	0	0	7	76	51	0	1	0	52	7	76	0	52	chr5_65567567
chr5	65567584	65567584	6.1	6.1%_98r	chr5	65567584	PPWD1	EXON	92	0	0	6	98	66	0	0	0	66	6	98	0	66	chr5_65567584
chr5	65569673	65569673	41.5	41.5%_53r	chr5	65569673	PPWD1	EXON	31	0	0	22	53	41	0	0	0	41	22	53	0	41	chr5_65569673
chr5	65583177	65583177	11.1	11.1%_72r	chr5	65583177	PPWD1	EXON	63	0	1	8	72	72	0	0	0	72	8	72	0	72	chr5_65583177
chr5	88436555	88436555	11.4	11.4%_35r	chr5	88436555	TMEM161B-AS1	EXON	31	0	0	4	35	22	0	0	0	22	4	35	0	22	chr5_88436555
chr5	140445974	140445974	8.3	8.3%_24r	chr5	140445974	ANKHD1	EXON	22	0	0	2	24	33	0	0	0	33	2	24	0	33	chr5_140445974
chr5	44815164	44815164	9.1	9.1%_44r	chr5	44815164	MRPS30	EXON	40	0	0	4	44	37	0	0	0	37	4	44	0	37	chr5_44815164
chr5	10680470	10680470	19.6	19.6%_56r	chr5	10680470	DAP	EXON	0	45	11	0	56	0	62	0	0	62	11	56	0	62	chr5_10680470
chr5	137945955	137945955	8.3	8.3%_24r	chr5	137945955	FAM13B	EXON	0	22	2	0	24	0	21	0	0	21	2	24	0	21	chr5_137945955
chr5	137952649	137952649	9.1	9.1%_22r	chr5	137952649	FAM13B	EXON	0	20	2	0	22	0	11	0	0	11	2	22	0	11	chr5_137952649
chr5	137952678	137952678	15.4	15.4%_26r	chr5	137952678	FAM13B	EXON	0	22	4	0	26	0	16	0	0	16	4	26	0	16	chr5_137952678
chr5	55165124	55165124	8.7	8.7%_23r	chr5	55165124	GPX8	EXON	21	0	0	2	23	13	0	0	0	13	2	23	0	13	chr5_55165124
chr5	55165142	55165142	15	15.0%_20r	chr5	55165142	GPX8	EXON	17	0	0	3	20	15	0	0	0	15	3	20	0	15	chr5_55165142
chr5	55166482	55166482	41.7	41.7%_24r	chr5	55166482	GPX8	EXON	14	0	0	10	24	14	0	0	0	14	10	24	0	14	chr5_55166482
chr5	41929749	41929749	9.1	9.1%_22r	chr5	41929749	FBXO4	EXON	20	0	0	2	22	24	0	0	0	24	2	22	0	24	chr5_41929749
chr5	41934249	41934249	12	12.0%_25r	chr5	41934249	FBXO4	EXON	22	0	0	3	25	19	0	0	0	19	3	25	0	19	chr5_41934249
chr5	41934251	41934251	28	28.0%_25r	chr5	41934251	FBXO4	EXON	18	0	0	7	25	20	0	0	0	20	7	25	0	20	chr5_41934251
chr5	157138987	157138987	12.1	12.1%_33r	chr5	157138987	MED7	EXON	0	29	4	0	33	0	25	0	0	25	4	33	0	25	chr5_157138987
chr5	157139334	157139334	8.3	8.3%_36r	chr5	157139334	MED7	EXON	0	33	3	0	36	0	27	0	0	27	3	36	0	27	chr5_157139334
chr5	150045536	150045536	14.3	14.3%_21r	chr5	150045536	HMGXB3	EXON	18	0	0	3	21	15	0	0	0	15	3	21	0	15	chr5_150045536
chr5	150052557	150052557	8.7	8.7%_23r	chr5	150052557	HMGXB3	EXON	21	0	0	2	23	11	0	0	0	11	2	23	0	11	chr5_150052557
chr5	205535	205535	9.3	9.3%_54r	chr5	205535	CCDC127	EXON	0	49	5	0	54	0	49	0	0	49	5	54	0	49	chr5_205535
chr5	52800749	52800749	10.3	10.3%_107r	chr5	52800749	ITGA1	INTRON	96	0	0	11	107	70	0	0	0	70	11	107	0	70	chr5_52800749
chr5	90516352	90516352	8.3	8.3%_24r	chr5	90516352	LYSMD3	EXON	0	22	2	0	24	0	19	0	0	19	2	24	0	19	chr5_90516352
chr5	90516372	90516372	6.1	6.1%_33r	chr5	90516372	LYSMD3	EXON	0	31	2	0	33	0	19	0	0	19	2	33	0	19	chr5_90516372
chr5	90516441	90516441	8.6	8.6%_35r	chr5	90516441	LYSMD3	EXON	0	32	3	0	35	0	28	0	0	28	3	35	0	28	chr5_90516441
chr5	90517237	90517237	9.1	9.1%_22r	chr5	90517237	LYSMD3	EXON	0	20	2	0	22	0	34	0	0	34	2	22	0	34	chr5_90517237
chr5	90517565	90517565	6.9	6.9%_29r	chr5	90517565	LYSMD3	EXON	0	27	2	0	29	0	19	0	0	19	2	29	0	19	chr5_90517565
chr5	90517609	90517609	6.1	6.1%_33r	chr5	90517609	LYSMD3	EXON	0	31	2	0	33	0	25	0	0	25	2	33	0	25	chr5_90517609
chr5	90517617	90517617	9.1	9.1%_22r	chr5	90517617	LYSMD3	EXON	0	20	2	0	22	0	21	0	0	21	2	22	0	21	chr5_90517617
chr5	90517759	90517759	9.7	9.7%_31r	chr5	90517759	LYSMD3	EXON	0	28	3	0	31	0	12	0	0	12	3	31	0	12	chr5_90517759
chr5	90518017	90518017	10	10.0%_30r	chr5	90518017	LYSMD3	EXON	0	27	3	0	30	0	21	0	0	21	3	30	0	21	chr5_90518017
chr5	90518301	90518301	13.8	13.8%_29r	chr5	90518301	LYSMD3	EXON	0	25	4	0	29	0	25	0	0	25	4	29	0	25	chr5_90518301
chr5	90518322	90518322	10.8	10.8%_37r	chr5	90518322	LYSMD3	EXON	0	33	4	0	37	0	28	0	0	28	4	37	0	28	chr5_90518322
chr5	90518831	90518831	15.4	15.4%_26r	chr5	90518831	LYSMD3	EXON	0	22	4	0	26	0	28	0	0	28	4	26	0	28	chr5_90518831
chr5	90519361	90519361	11.4	11.4%_35r	chr5	90519361	LYSMD3	EXON	0	31	4	0	35	0	28	0	0	28	4	35	0	28	chr5_90519361
chr5	224468	224468	23.4	23.4%_137r	chr5	224468	SDHA	EXON	105	0	0	32	137	159	0	0	0	159	32	137	0	159	chr5_224468
chr5	256428	256428	15.9	15.9%_151r	chr5	256428	SDHA	EXON	127	0	0	24	151	150	0	0	0	150	24	151	0	150	chr5_256428
chr5	256559	256559	9.8	9.8%_82r	chr5	256559	SDHA	EXON	74	0	0	8	82	71	0	0	0	71	8	82	0	71	chr5_256559
chr5	256592	256592	12.9	12.9%_62r	chr5	256592	SDHA	EXON	54	0	0	8	62	52	0	0	0	52	8	62	0	52	chr5_256592
chr5	176905329	176905329	21.9	21.9%_32r	chr5	176905329	UIMC1	EXON	0	25	7	0	32	0	21	0	0	21	7	32	0	21	chr5_176905329
chr5	176905403	176905403	13.9	13.9%_36r	chr5	176905403	UIMC1	EXON	0	31	5	0	36	0	27	0	0	27	5	36	0	27	chr5_176905403
chr5	176907147	176907147	22.5	22.5%_40r	chr5	176907147	UIMC1	EXON	0	31	9	0	40	0	43	0	0	43	9	40	0	43	chr5_176907147
chr5	176951539	176951539	13.6	13.6%_22r	chr5	176951539	UIMC1	EXON	0	19	3	0	22	0	39	0	0	39	3	22	0	39	chr5_176951539
chr5	176955978	176955978	15.8	15.8%_38r	chr5	176955978	UIMC1	EXON	0	32	6	0	38	0	30	0	0	30	6	38	0	30	chr5_176955978
chr5	176956010	176956010	14.3	14.3%_42r	chr5	176956010	UIMC1	EXON	0	36	6	0	42	0	38	0	0	38	6	42	0	38	chr5_176956010
chr5	176968662	176968662	7.4	7.4%_27r	chr5	176968662	UIMC1	EXON	0	25	2	0	27	0	29	0	0	29	2	27	0	29	chr5_176968662
chr5	176968972	176968972	25	25.0%_36r	chr5	176968972	UIMC1	EXON	0	27	9	0	36	0	23	0	0	23	9	36	0	23	chr5_176968972
chr5	176969282	176969282	6.9	6.9%_29r	chr5	176969282	UIMC1	EXON	0	27	2	0	29	0	30	0	0	30	2	29	0	30	chr5_176969282
chr5	176970750	176970750	14.7	14.7%_34r	chr5	176970750	UIMC1	EXON	0	29	5	0	34	0	33	0	0	33	5	34	0	33	chr5_176970750
chr5	177610001	177610001	8.5	8.5%_47r	chr5	177610001	B4GALT7	EXON	43	0	0	4	47	38	0	0	0	38	4	47	0	38	chr5_177610001
chr5	138445313	138445313	7.7	7.7%_78r	chr5	138445313	REEP2	EXON	72	0	0	6	78	89	0	0	0	89	6	78	0	89	chr5_138445313
chr5	138446427	138446427	30	30.0%_40r	chr5	138446427	REEP2	EXON	28	0	0	12	40	22	0	0	0	22	12	40	0	22	chr5_138446427
chr5	138446520	138446520	13.2	13.2%_38r	chr5	138446520	REEP2	EXON	33	0	0	5	38	36	0	0	0	36	5	38	0	36	chr5_138446520
chr5	138446759	138446759	29	29.0%_31r	chr5	138446759	REEP2	EXON	22	0	0	9	31	31	0	0	0	31	9	31	0	31	chr5_138446759
chr5	73090259	73090259	60	60.0%_20r	chr5	73090259	FCHO2	EXON	8	0	0	12	20	11	0	0	0	11	12	20	0	11	chr5_73090259
chr5	55425292	55425292	11.5	11.5%_26r	chr5	55425292	PLPP1	EXON	0	23	3	0	26	0	33	0	0	33	3	26	0	33	chr5_55425292
chr5	177331634	177331634	8.6	8.6%_152r	chr5	177331634	LMAN2	EXON	0	139	13	0	152	0	144	0	0	144	13	152	0	144	chr5_177331634
chr5	177331665	177331665	77.3	77.3%_132r	chr5	177331665	LMAN2	EXON	0	30	102	0	132	0	153	0	0	153	102	132	0	153	chr5_177331665
chr5	177331679	177331679	20	20.0%_115r	chr5	177331679	LMAN2	EXON	0	92	23	0	115	0	122	0	0	122	23	115	0	122	chr5_177331679
chr5	177331699	177331699	8.1	8.1%_148r	chr5	177331699	LMAN2	EXON	0	136	12	0	148	0	151	0	0	151	12	148	0	151	chr5_177331699
chr5	177331808	177331808	22.1	22.1%_190r	chr5	177331808	LMAN2	EXON	1	147	42	0	190	0	177	0	0	177	42	190	0	177	chr5_177331808
chr5	177331830	177331830	60.7	60.7%_206r	chr5	177331830	LMAN2	EXON	1	80	125	0	206	0	251	0	0	251	125	206	0	251	chr5_177331830
chr5	177332090	177332090	13.8	13.8%_325r	chr5	177332090	LMAN2	EXON	1	279	45	0	325	0	301	0	0	301	45	325	0	301	chr5_177332090
chr5	177332111	177332111	10.4	10.4%_260r	chr5	177332111	LMAN2	EXON	1	232	27	0	260	0	232	0	0	232	27	260	0	232	chr5_177332111
chr5	177332222	177332222	13.8	13.8%_217r	chr5	177332222	LMAN2	EXON	0	186	30	1	217	0	234	0	2	236	30	217	0	236	chr5_177332222
chr5	177334355	177334355	11.1	11.1%_380r	chr5	177334355	LMAN2	EXON	0	336	42	2	380	0	336	0	3	339	42	380	0	339	chr5_177334355
chr5	144158321	144158321	19	19.0%_21r	chr5	144158321	YIPF5	EXON	0	17	4	0	21	0	16	0	0	16	4	21	0	16	chr5_144158321
chr5	144160052	144160052	8.2	8.2%_73r	chr5	144160052	YIPF5	EXON	0	67	6	0	73	0	44	0	0	44	6	73	0	44	chr5_144160052
chr5	144160081	144160081	9.2	9.2%_65r	chr5	144160081	YIPF5	EXON	0	59	6	0	65	0	50	0	0	50	6	65	0	50	chr5_144160081
chr5	144160291	144160291	14.1	14.1%_92r	chr5	144160291	YIPF5	EXON	0	79	13	0	92	0	65	0	0	65	13	92	0	65	chr5_144160291
chr5	144160446	144160446	7.1	7.1%_126r	chr5	144160446	YIPF5	EXON	0	117	9	0	126	0	104	0	0	104	9	126	0	104	chr5_144160446
chr5	144160550	144160550	26.9	26.9%_93r	chr5	144160550	YIPF5	EXON	0	68	25	0	93	0	107	0	0	107	25	93	0	107	chr5_144160550
chr5	144162392	144162392	11.7	11.7%_94r	chr5	144162392	YIPF5	EXON	0	83	11	0	94	0	97	0	0	97	11	94	0	97	chr5_144162392
chr5	144162393	144162393	6.5	6.5%_93r	chr5	144162393	YIPF5	EXON	0	87	6	0	93	1	96	0	0	97	6	93	0	97	chr5_144162393
chr5	93682951	93682951	12.2	12.2%_74r	chr5	93682951	FAM172A	INTRON	0	65	9	0	74	0	65	0	0	65	9	74	0	65	chr5_93682951
chr5	93683250	93683250	15.2	15.2%_66r	chr5	93683250	FAM172A	INTRON	0	56	10	0	66	1	78	0	0	79	10	66	0	79	chr5_93683250
chr5	93683251	93683251	24.2	24.2%_66r	chr5	93683251	FAM172A	INTRON	0	50	16	0	66	0	78	0	0	78	16	66	0	78	chr5_93683251
chr5	93683258	93683258	14.6	14.6%_48r	chr5	93683258	FAM172A	INTRON	0	41	7	0	48	0	37	0	0	37	7	48	0	37	chr5_93683258
chr5	93683261	93683261	15.6	15.6%_45r	chr5	93683261	FAM172A	INTRON	0	38	7	0	45	0	31	0	0	31	7	45	0	31	chr5_93683261
chr5	93683263	93683263	13	13.0%_46r	chr5	93683263	FAM172A	INTRON	0	39	6	1	46	1	30	0	0	31	6	46	0	31	chr5_93683263
chr5	93683270	93683270	50	50.0%_28r	chr5	93683270	FAM172A	INTRON	0	14	14	0	28	0	21	0	0	21	14	28	0	21	chr5_93683270
chr5	93683368	93683368	44.2	44.2%_77r	chr5	93683368	FAM172A	INTRON	0	43	34	0	77	0	34	0	0	34	34	77	0	34	chr5_93683368
chr5	93683371	93683371	25	25.0%_80r	chr5	93683371	FAM172A	INTRON	0	60	20	0	80	0	39	0	0	39	20	80	0	39	chr5_93683371
chr5	112985878	112985878	8	8.0%_25r	chr5	112985878	DCP2	EXON	23	0	0	2	25	22	0	0	0	22	2	25	0	22	chr5_112985878
chr5	112985883	112985883	13.6	13.6%_22r	chr5	112985883	DCP2	EXON	19	0	0	3	22	21	0	0	0	21	3	22	0	21	chr5_112985883
chr5	112985952	112985952	13.8	13.8%_29r	chr5	112985952	DCP2	EXON	25	0	0	4	29	28	0	0	0	28	4	29	0	28	chr5_112985952
chr5	112992126	112992126	10	10.0%_20r	chr5	112992126	DCP2	EXON	18	0	0	2	20	12	0	0	0	12	2	20	0	12	chr5_112992126
chr5	113001108	113001108	9.1	9.1%_33r	chr5	113001108	DCP2	EXON	30	0	0	3	33	36	0	0	0	36	3	33	0	36	chr5_113001108
chr5	113001111	113001111	42.4	42.4%_33r	chr5	113001111	DCP2	EXON	19	0	0	14	33	40	0	0	0	40	14	33	0	40	chr5_113001111
chr5	113001112	113001112	9.4	9.4%_32r	chr5	113001112	DCP2	EXON	29	0	0	3	32	40	0	0	0	40	3	32	0	40	chr5_113001112
chr5	113001113	113001113	18.2	18.2%_33r	chr5	113001113	DCP2	EXON	27	0	0	6	33	39	0	0	0	39	6	33	0	39	chr5_113001113
chr5	113015790	113015790	10	10.0%_20r	chr5	113015790	DCP2	EXON	18	0	0	2	20	23	0	0	0	23	2	20	0	23	chr5_113015790
chr5	113017331	113017331	15.4	15.4%_26r	chr5	113017331	DCP2	EXON	22	0	0	4	26	26	0	0	0	26	4	26	0	26	chr5_113017331
chr5	113017364	113017364	8	8.0%_25r	chr5	113017364	DCP2	EXON	23	0	0	2	25	11	0	0	0	11	2	25	0	11	chr5_113017364
chr5	113017879	113017879	9.1	9.1%_22r	chr5	113017879	DCP2	EXON	20	0	0	2	22	16	0	0	0	16	2	22	0	16	chr5_113017879
chr5	113018440	113018440	20	20.0%_20r	chr5	113018440	DCP2	EXON	16	0	0	4	20	14	0	0	0	14	4	20	0	14	chr5_113018440
chr5	113018460	113018460	18.2	18.2%_22r	chr5	113018460	DCP2	EXON	18	0	0	4	22	15	0	0	0	15	4	22	0	15	chr5_113018460
chr5	113019328	113019328	10	10.0%_20r	chr5	113019328	DCP2	EXON	18	0	0	2	20	17	0	0	0	17	2	20	0	17	chr5_113019328
chr5	113019409	113019409	20	20.0%_20r	chr5	113019409	DCP2	EXON	16	0	0	4	20	17	0	0	0	17	4	20	0	17	chr5_113019409
chr5	113020436	113020436	6.7	6.7%_30r	chr5	113020436	DCP2	EXON	28	0	0	2	30	14	0	0	0	14	2	30	0	14	chr5_113020436
chr5	113020444	113020444	6.1	6.1%_33r	chr5	113020444	DCP2	EXON	31	0	0	2	33	16	0	0	0	16	2	33	0	16	chr5_113020444
chr5	113020468	113020468	7.7	7.7%_26r	chr5	113020468	DCP2	EXON	24	0	0	2	26	14	0	0	0	14	2	26	0	14	chr5_113020468
chr5	113020474	113020474	7.7	7.7%_26r	chr5	113020474	DCP2	EXON	24	0	0	2	26	16	0	0	0	16	2	26	0	16	chr5_113020474
chr5	113020475	113020475	7.7	7.7%_26r	chr5	113020475	DCP2	EXON	24	0	0	2	26	16	0	0	0	16	2	26	0	16	chr5_113020475
chr5	113020510	113020510	7.1	7.1%_28r	chr5	113020510	DCP2	EXON	26	0	0	2	28	23	0	0	0	23	2	28	0	23	chr5_113020510
chr5	113020522	113020522	8	8.0%_25r	chr5	113020522	DCP2	EXON	23	0	0	2	25	20	0	0	0	20	2	25	0	20	chr5_113020522
chr5	113020753	113020753	6.9	6.9%_29r	chr5	113020753	DCP2	EXON	27	0	0	2	29	15	0	0	0	15	2	29	0	15	chr5_113020753
chr5	113020754	113020754	40	40.0%_30r	chr5	113020754	DCP2	EXON	18	0	0	12	30	15	0	0	0	15	12	30	0	15	chr5_113020754
chr5	113020755	113020755	6.2	6.2%_32r	chr5	113020755	DCP2	EXON	30	0	0	2	32	16	0	0	0	16	2	32	0	16	chr5_113020755
chr5	113020793	113020793	12	12.0%_25r	chr5	113020793	DCP2	EXON	22	0	0	3	25	10	0	0	0	10	3	25	0	10	chr5_113020793
chr5	113020825	113020825	13.6	13.6%_22r	chr5	113020825	DCP2	EXON	19	0	0	3	22	13	0	0	0	13	3	22	0	13	chr5_113020825
chr5	66164851	66164851	8.5	8.5%_71r	chr5	66164851	SREK1	EXON	65	0	0	6	71	50	0	0	0	50	6	71	0	50	chr5_66164851
chr5	66179055	66179055	8.7	8.7%_23r	chr5	66179055	SREK1	EXON	21	0	0	2	23	11	0	0	0	11	2	23	0	11	chr5_66179055
chr5	66179056	66179056	7.4	7.4%_27r	chr5	66179056	SREK1	EXON	25	0	0	2	27	12	0	0	0	12	2	27	0	12	chr5_66179056
chr5	66179058	66179058	6.9	6.9%_29r	chr5	66179058	SREK1	EXON	27	0	0	2	29	12	0	0	0	12	2	29	0	12	chr5_66179058
chr5	66179060	66179060	10.3	10.3%_29r	chr5	66179060	SREK1	EXON	26	0	0	3	29	12	0	0	0	12	3	29	0	12	chr5_66179060
chr5	66179779	66179779	22.9	22.9%_35r	chr5	66179779	SREK1	EXON	27	0	0	8	35	28	0	0	0	28	8	35	0	28	chr5_66179779
chr5	66179832	66179832	20	20.0%_25r	chr5	66179832	SREK1	EXON	20	0	0	5	25	24	0	0	0	24	5	25	0	24	chr5_66179832
chr5	66180308	66180308	6.7	6.7%_30r	chr5	66180308	SREK1	EXON	28	0	0	2	30	27	0	0	0	27	2	30	0	27	chr5_66180308
chr5	66180417	66180417	39.5	39.5%_38r	chr5	66180417	SREK1	EXON	23	0	0	15	38	21	0	0	0	21	15	38	0	21	chr5_66180417
chr5	66180458	66180458	7.8	7.8%_51r	chr5	66180458	SREK1	EXON	47	0	0	4	51	24	0	0	0	24	4	51	0	24	chr5_66180458
chr5	66180492	66180492	11.5	11.5%_52r	chr5	66180492	SREK1	EXON	46	0	0	6	52	31	0	0	0	31	6	52	0	31	chr5_66180492
chr5	66180732	66180732	71	71.0%_31r	chr5	66180732	SREK1	EXON	9	0	0	22	31	27	0	0	0	27	22	31	0	27	chr5_66180732
chr5	66180735	66180735	18.2	18.2%_33r	chr5	66180735	SREK1	EXON	27	0	0	6	33	30	0	0	0	30	6	33	0	30	chr5_66180735
chr5	175959621	175959621	39.1	39.1%_23r	chr5	175959621	THOC3	EXON	0	14	9	0	23	0	37	0	0	37	9	23	0	37	chr5_175959621
chr5	175960117	175960117	8.3	8.3%_145r	chr5	175960117	THOC3	EXON	0	133	12	0	145	0	167	0	0	167	12	145	0	167	chr5_175960117
chr5	112876433	112876433	10	10.0%_30r	chr5	112876433	REEP5	EXON	0	27	3	0	30	0	40	0	0	40	3	30	0	40	chr5_112876433
chr5	112876449	112876449	7.5	7.5%_40r	chr5	112876449	REEP5	EXON	0	37	3	0	40	0	41	0	0	41	3	40	0	41	chr5_112876449
chr5	112876516	112876516	7.1	7.1%_42r	chr5	112876516	REEP5	EXON	0	39	3	0	42	0	35	0	0	35	3	42	0	35	chr5_112876516
chr5	112876560	112876560	42.9	42.9%_35r	chr5	112876560	REEP5	EXON	0	20	15	0	35	0	32	0	0	32	15	35	0	32	chr5_112876560
chr5	112876658	112876658	9.5	9.5%_42r	chr5	112876658	REEP5	EXON	0	38	4	0	42	0	33	0	0	33	4	42	0	33	chr5_112876658
chr5	112876666	112876666	20.5	20.5%_39r	chr5	112876666	REEP5	EXON	0	31	8	0	39	0	42	0	0	42	8	39	0	42	chr5_112876666
chr5	112876686	112876686	16.2	16.2%_37r	chr5	112876686	REEP5	EXON	0	31	6	0	37	0	38	0	0	38	6	37	0	38	chr5_112876686
chr5	112876701	112876701	34.1	34.1%_44r	chr5	112876701	REEP5	EXON	0	29	15	0	44	0	39	0	0	39	15	44	0	39	chr5_112876701
chr5	112876783	112876783	7.1	7.1%_42r	chr5	112876783	REEP5	EXON	0	39	3	0	42	0	37	0	0	37	3	42	0	37	chr5_112876783
chr5	112877180	112877180	6.7	6.7%_60r	chr5	112877180	REEP5	EXON	0	56	4	0	60	0	55	0	0	55	4	60	0	55	chr5_112877180
chr5	112877425	112877425	11.4	11.4%_35r	chr5	112877425	REEP5	EXON	0	31	4	0	35	0	35	0	0	35	4	35	0	35	chr5_112877425
chr5	112877926	112877926	28.9	28.9%_38r	chr5	112877926	REEP5	EXON	0	27	11	0	38	0	43	0	0	43	11	38	0	43	chr5_112877926
chr5	112878106	112878106	39.1	39.1%_23r	chr5	112878106	REEP5	EXON	0	14	9	0	23	0	26	0	0	26	9	23	0	26	chr5_112878106
chr5	112878175	112878175	7.7	7.7%_26r	chr5	112878175	REEP5	EXON	0	24	2	0	26	0	16	0	0	16	2	26	0	16	chr5_112878175
chr5	112878297	112878297	6.9	6.9%_29r	chr5	112878297	REEP5	EXON	0	26	2	1	29	0	44	0	0	44	2	29	0	44	chr5_112878297
chr5	112878310	112878310	7.4	7.4%_27r	chr5	112878310	REEP5	EXON	0	25	2	0	27	0	43	0	0	43	2	27	0	43	chr5_112878310
chr5	112878389	112878389	8	8.0%_25r	chr5	112878389	REEP5	EXON	0	23	2	0	25	0	22	0	0	22	2	25	0	22	chr5_112878389
chr5	112878510	112878510	9.8	9.8%_51r	chr5	112878510	REEP5	EXON	0	46	5	0	51	0	44	0	0	44	5	51	0	44	chr5_112878510
chr5	112878511	112878511	9.4	9.4%_53r	chr5	112878511	REEP5	EXON	0	48	5	0	53	0	47	0	0	47	5	53	0	47	chr5_112878511
chr5	112887065	112887065	18.3	18.3%_278r	chr5	112887065	REEP5	EXON	0	227	51	0	278	0	214	0	0	214	51	278	0	214	chr5_112887065
chr5	112922117	112922117	11.7	11.7%_128r	chr5	112922117	REEP5	EXON	1	112	15	0	128	0	99	0	0	99	15	128	0	99	chr5_112922117
chr5	140671402	140671402	9.1	9.1%_22r	chr5	140671402	DND1	EXON	0	20	2	0	22	0	17	0	0	17	2	22	0	17	chr5_140671402
chr5	81420193	81420193	80	80.0%_25r	chr5	81420193	SSBP2	EXON	0	5	20	0	25	0	13	0	0	13	20	25	0	13	chr5_81420193
chr5	81420197	81420197	73.1	73.1%_26r	chr5	81420197	SSBP2	EXON	0	7	19	0	26	0	14	0	0	14	19	26	0	14	chr5_81420197
chr5	81420199	81420199	56	56.0%_25r	chr5	81420199	SSBP2	EXON	0	11	14	0	25	0	12	0	0	12	14	25	0	12	chr5_81420199
chr5	81420226	81420226	94.9	94.9%_39r	chr5	81420226	SSBP2	EXON	0	2	37	0	39	0	27	0	0	27	37	39	0	27	chr5_81420226
chr5	81428638	81428638	13.6	13.6%_44r	chr5	81428638	SSBP2	EXON	0	38	6	0	44	0	29	0	0	29	6	44	0	29	chr5_81428638
chr5	81437449	81437449	8.9	8.9%_45r	chr5	81437449	SSBP2	EXON	0	41	4	0	45	0	24	0	0	24	4	45	0	24	chr5_81437449
chr5	81440595	81440595	25.7	25.7%_35r	chr5	81440595	SSBP2	EXON	0	26	9	0	35	0	16	0	0	16	9	35	0	16	chr5_81440595
chr5	81466990	81466990	8.8	8.8%_34r	chr5	81466990	SSBP2	EXON	0	31	3	0	34	0	13	0	0	13	3	34	0	13	chr5_81466990
chr5	81489276	81489276	20.8	20.8%_24r	chr5	81489276	SSBP2	EXON	0	19	5	0	24	0	14	0	0	14	5	24	0	14	chr5_81489276
chr5	75584906	75584906	21.7	21.7%_23r	chr5	75584906	POLK	EXON	18	0	0	5	23	23	0	0	0	23	5	23	0	23	chr5_75584906
chr5	75596802	75596802	16	16.0%_25r	chr5	75596802	POLK	EXON	21	0	0	4	25	19	0	0	0	19	4	25	0	19	chr5_75596802
chr5	1317953	1317953	9.1	9.1%_55r	chr5	1317953	CLPTM1L	EXON	0	50	5	0	55	0	37	0	0	37	5	55	0	37	chr5_1317953
chr5	1318331	1318331	8.3	8.3%_24r	chr5	1318331	CLPTM1L	EXON	0	22	2	0	24	0	17	0	0	17	2	24	0	17	chr5_1318331
chr5	163454002	163454002	7.9	7.9%_164r	chr5	163454002	NUDCD2	EXON	0	151	13	0	164	0	136	0	0	136	13	164	0	136	chr5_163454002
chr5	163456974	163456974	38.9	38.9%_198r	chr5	163456974	NUDCD2	EXON	0	121	77	0	198	0	170	0	0	170	77	198	0	170	chr5_163456974
chr5	163459958	163459958	7.5	7.5%_133r	chr5	163459958	NUDCD2	EXON	0	123	10	0	133	0	92	0	0	92	10	133	0	92	chr5_163459958
chr5	173959402	173959402	9.1	9.1%_22r	chr5	173959402	CPEB4	EXON	20	0	0	2	22	13	0	0	0	13	2	22	0	13	chr5_173959402
chr5	173960221	173960221	10.7	10.7%_28r	chr5	173960221	CPEB4	EXON	25	0	0	3	28	14	0	0	0	14	3	28	0	14	chr5_173960221
chr5	78418860	78418860	7.1	7.1%_42r	chr5	78418860	SCAMP1	EXON	39	0	0	3	42	41	0	0	0	41	3	42	0	41	chr5_78418860
chr5	78475731	78475731	9.5	9.5%_63r	chr5	78475731	SCAMP1	EXON	57	0	0	6	63	62	0	0	0	62	6	63	0	62	chr5_78475731
chr5	78476027	78476027	25.5	25.5%_47r	chr5	78476027	SCAMP1	EXON	35	0	0	12	47	49	0	0	0	49	12	47	0	49	chr5_78476027
chr5	78476032	78476032	8.9	8.9%_45r	chr5	78476032	SCAMP1	EXON	41	0	0	4	45	49	0	0	0	49	4	45	0	49	chr5_78476032
chr5	78476524	78476524	15.4	15.4%_26r	chr5	78476524	SCAMP1	EXON	22	0	0	4	26	25	0	0	0	25	4	26	0	25	chr5_78476524
chr5	78477161	78477161	23.1	23.1%_26r	chr5	78477161	SCAMP1	EXON	20	0	0	6	26	32	0	0	0	32	6	26	0	32	chr5_78477161
chr5	78477232	78477232	7.5	7.5%_53r	chr5	78477232	SCAMP1	EXON	49	0	0	4	53	55	0	0	0	55	4	53	0	55	chr5_78477232
chr5	78477307	78477307	50	50.0%_22r	chr5	78477307	SCAMP1	EXON	11	0	0	11	22	24	0	0	0	24	11	22	0	24	chr5_78477307
chr5	78477309	78477309	23.8	23.8%_21r	chr5	78477309	SCAMP1	EXON	15	0	1	5	21	22	0	0	0	22	5	21	0	22	chr5_78477309
chr5	78477579	78477579	14.3	14.3%_21r	chr5	78477579	SCAMP1	EXON	18	0	0	3	21	27	0	0	0	27	3	21	0	27	chr5_78477579
chr5	78477808	78477808	24.2	24.2%_33r	chr5	78477808	SCAMP1	EXON	25	0	0	8	33	28	0	0	0	28	8	33	0	28	chr5_78477808
chr5	78477912	78477912	7.7	7.7%_26r	chr5	78477912	SCAMP1	EXON	24	0	0	2	26	25	0	0	0	25	2	26	0	25	chr5_78477912
chr5	78478196	78478196	21.4	21.4%_28r	chr5	78478196	SCAMP1	EXON	22	0	0	6	28	20	0	0	0	20	6	28	0	20	chr5_78478196
chr5	36195177	36195177	8.3	8.3%_24r	chr5	36195177	NADK2	EXON	0	22	2	0	24	0	19	0	0	19	2	24	0	19	chr5_36195177
chr5	81308663	81308663	7.6	7.6%_66r	chr5	81308663	ZCCHC9	EXON	61	0	0	5	66	59	0	0	0	59	5	66	0	59	chr5_81308663
chr5	81308688	81308688	17	17.0%_53r	chr5	81308688	ZCCHC9	EXON	43	1	0	9	53	49	0	1	0	50	9	53	0	50	chr5_81308688
chr5	81308698	81308698	43.6	43.6%_39r	chr5	81308698	ZCCHC9	EXON	22	0	0	17	39	45	0	0	0	45	17	39	0	45	chr5_81308698
chr5	81312749	81312749	6.7	6.7%_75r	chr5	81312749	ZCCHC9	EXON	70	0	0	5	75	53	0	0	0	53	5	75	0	53	chr5_81312749
chr5	81312974	81312974	6.9	6.9%_29r	chr5	81312974	ZCCHC9	EXON	27	0	0	2	29	19	0	0	0	19	2	29	0	19	chr5_81312974
chr5	81312977	81312977	7.1	7.1%_28r	chr5	81312977	ZCCHC9	EXON	26	0	0	2	28	19	0	0	0	19	2	28	0	19	chr5_81312977
chr5	141620978	141620978	6.5	6.5%_62r	chr5	141620978	HDAC3	EXON	0	58	4	0	62	0	64	0	0	64	4	62	0	64	chr5_141620978
chr5	141621055	141621055	16.7	16.7%_48r	chr5	141621055	HDAC3	EXON	0	40	8	0	48	0	39	0	0	39	8	48	0	39	chr5_141621055
chr5	141626244	141626244	9	9.0%_100r	chr5	141626244	HDAC3	EXON	0	91	9	0	100	0	89	0	0	89	9	100	0	89	chr5_141626244
chr5	141628630	141628630	10.5	10.5%_124r	chr5	141628630	HDAC3	EXON	0	111	13	0	124	0	121	0	0	121	13	124	0	121	chr5_141628630
chr5	141629205	141629205	6.5	6.5%_108r	chr5	141629205	HDAC3	EXON	0	101	7	0	108	0	84	0	0	84	7	108	0	84	chr5_141629205
chr5	141630068	141630068	6.4	6.4%_94r	chr5	141630068	HDAC3	EXON	0	88	6	0	94	0	78	0	0	78	6	94	0	78	chr5_141630068
chr5	69171323	69171323	8	8.0%_226r	chr5	69171323	CCNB1	EXON	208	0	0	18	226	235	0	0	0	235	18	226	0	235	chr5_69171323
chr5	69178031	69178031	8	8.0%_25r	chr5	69178031	CCNB1	EXON	23	0	0	2	25	17	0	0	0	17	2	25	0	17	chr5_69178031
chr5	138341367	138341367	6.9	6.9%_58r	chr5	138341367	FAM53C	EXON	53	0	1	4	58	39	0	1	0	40	4	58	0	40	chr5_138341367
chr5	138344839	138344839	6.5	6.5%_62r	chr5	138344839	FAM53C	EXON	58	0	0	4	62	36	0	0	0	36	4	62	0	36	chr5_138344839
chr5	138344941	138344941	7.7	7.7%_52r	chr5	138344941	FAM53C	EXON	48	0	0	4	52	44	0	0	0	44	4	52	0	44	chr5_138344941
chr5	138344951	138344951	34	34.0%_50r	chr5	138344951	FAM53C	EXON	32	0	1	17	50	46	0	0	0	46	17	50	0	46	chr5_138344951
chr5	138345217	138345217	11.1	11.1%_36r	chr5	138345217	FAM53C	EXON	32	0	0	4	36	23	0	0	0	23	4	36	0	23	chr5_138345217
chr5	138345477	138345477	20.7	20.7%_29r	chr5	138345477	FAM53C	EXON	23	0	0	6	29	25	0	0	0	25	6	29	0	25	chr5_138345477
chr5	138345499	138345499	28.6	28.6%_28r	chr5	138345499	FAM53C	EXON	20	0	0	8	28	29	0	0	0	29	8	28	0	29	chr5_138345499
chr5	138345534	138345534	8	8.0%_25r	chr5	138345534	FAM53C	EXON	23	0	0	2	25	17	0	0	0	17	2	25	0	17	chr5_138345534
chr5	138346972	138346972	10.3	10.3%_29r	chr5	138346972	FAM53C	EXON	26	0	0	3	29	22	0	0	0	22	3	29	0	22	chr5_138346972
chr5	138347053	138347053	9.3	9.3%_43r	chr5	138347053	FAM53C	EXON	37	2	0	4	43	22	0	0	0	22	4	43	0	22	chr5_138347053
chr5	138347080	138347080	7.7	7.7%_26r	chr5	138347080	FAM53C	EXON	24	0	0	2	26	17	0	0	0	17	2	26	0	17	chr5_138347080
chr5	138347141	138347141	12	12.0%_25r	chr5	138347141	FAM53C	EXON	21	1	0	3	25	24	0	0	0	24	3	25	0	24	chr5_138347141
chr5	138347182	138347182	46.2	46.2%_39r	chr5	138347182	FAM53C	EXON	21	0	0	18	39	42	0	0	0	42	18	39	0	42	chr5_138347182
chr5	138347250	138347250	7.7	7.7%_39r	chr5	138347250	FAM53C	EXON	36	0	0	3	39	36	0	0	0	36	3	39	0	36	chr5_138347250
chr5	138347301	138347301	9.4	9.4%_32r	chr5	138347301	FAM53C	EXON	29	0	0	3	32	24	0	0	0	24	3	32	0	24	chr5_138347301
chr5	138347317	138347317	23.8	23.8%_42r	chr5	138347317	FAM53C	EXON	32	0	0	10	42	34	0	0	0	34	10	42	0	34	chr5_138347317
chr5	138347346	138347346	22.2	22.2%_36r	chr5	138347346	FAM53C	EXON	28	0	0	8	36	26	0	1	0	27	8	36	0	27	chr5_138347346
chr5	138347357	138347357	14.9	14.9%_47r	chr5	138347357	FAM53C	EXON	40	0	0	7	47	33	0	0	0	33	7	47	0	33	chr5_138347357
chr5	138347360	138347360	6.8	6.8%_44r	chr5	138347360	FAM53C	EXON	41	0	0	3	44	30	0	0	0	30	3	44	0	30	chr5_138347360
chr5	138347361	138347361	6.7	6.7%_45r	chr5	138347361	FAM53C	EXON	42	0	0	3	45	32	0	0	0	32	3	45	0	32	chr5_138347361
chr5	138347418	138347418	8.6	8.6%_58r	chr5	138347418	FAM53C	EXON	53	0	0	5	58	41	0	0	0	41	5	58	0	41	chr5_138347418
chr5	138347429	138347429	8.1	8.1%_62r	chr5	138347429	FAM53C	EXON	57	0	0	5	62	54	0	0	0	54	5	62	0	54	chr5_138347429
chr5	138347519	138347519	9.1	9.1%_44r	chr5	138347519	FAM53C	EXON	39	1	0	4	44	42	0	0	0	42	4	44	0	42	chr5_138347519
chr5	138347838	138347838	13.8	13.8%_29r	chr5	138347838	FAM53C	EXON	25	0	0	4	29	23	0	0	0	23	4	29	0	23	chr5_138347838
chr5	138347930	138347930	8.8	8.8%_80r	chr5	138347930	FAM53C	EXON	73	0	0	7	80	74	0	0	0	74	7	80	0	74	chr5_138347930
chr5	138347956	138347956	7.5	7.5%_80r	chr5	138347956	FAM53C	EXON	74	0	0	6	80	57	0	0	0	57	6	80	0	57	chr5_138347956
chr5	138347978	138347978	7.6	7.6%_66r	chr5	138347978	FAM53C	EXON	61	0	0	5	66	39	0	0	0	39	5	66	0	39	chr5_138347978
chr5	138348060	138348060	6.2	6.2%_65r	chr5	138348060	FAM53C	EXON	61	0	0	4	65	39	0	0	0	39	4	65	0	39	chr5_138348060
chr5	138348096	138348096	14.7	14.7%_68r	chr5	138348096	FAM53C	EXON	58	0	0	10	68	64	0	0	0	64	10	68	0	64	chr5_138348096
chr5	138348101	138348101	31.7	31.7%_63r	chr5	138348101	FAM53C	EXON	43	0	0	20	63	58	0	0	0	58	20	63	0	58	chr5_138348101
chr5	138348190	138348190	14.3	14.3%_105r	chr5	138348190	FAM53C	EXON	90	0	0	15	105	64	1	0	0	65	15	105	0	65	chr5_138348190
chr5	138348249	138348249	7.5	7.5%_53r	chr5	138348249	FAM53C	EXON	49	0	0	4	53	51	0	0	0	51	4	53	0	51	chr5_138348249
chr5	138348312	138348312	6.9	6.9%_58r	chr5	138348312	FAM53C	EXON	53	0	1	4	58	51	0	0	0	51	4	58	0	51	chr5_138348312
chr5	138348389	138348389	7.5	7.5%_93r	chr5	138348389	FAM53C	EXON	86	0	0	7	93	74	0	0	0	74	7	93	0	74	chr5_138348389
chr5	138348517	138348517	6.1	6.1%_66r	chr5	138348517	FAM53C	EXON	62	0	0	4	66	60	0	0	0	60	4	66	0	60	chr5_138348517
chr5	138348744	138348744	12.6	12.6%_103r	chr5	138348744	FAM53C	EXON	90	0	0	13	103	88	0	0	0	88	13	103	0	88	chr5_138348744
chr5	138348941	138348941	9.4	9.4%_85r	chr5	138348941	FAM53C	EXON	77	0	0	8	85	61	0	0	0	61	8	85	0	61	chr5_138348941
chr5	138349186	138349186	8.4	8.4%_83r	chr5	138349186	FAM53C	EXON	76	0	0	7	83	79	0	0	0	79	7	83	0	79	chr5_138349186
chr5	138349290	138349290	6.4	6.4%_47r	chr5	138349290	FAM53C	EXON	44	0	0	3	47	45	0	0	0	45	3	47	0	45	chr5_138349290
chr5	138349292	138349292	12.5	12.5%_48r	chr5	138349292	FAM53C	EXON	42	0	0	6	48	46	0	0	0	46	6	48	0	46	chr5_138349292
chr5	138349296	138349296	10.6	10.6%_47r	chr5	138349296	FAM53C	EXON	42	0	0	5	47	45	0	0	0	45	5	47	0	45	chr5_138349296
chr5	138349315	138349315	11.3	11.3%_62r	chr5	138349315	FAM53C	EXON	55	0	0	7	62	44	0	0	0	44	7	62	0	44	chr5_138349315
chr5	138349367	138349367	23.7	23.7%_76r	chr5	138349367	FAM53C	EXON	58	0	0	18	76	51	0	0	0	51	18	76	0	51	chr5_138349367
chr5	138349438	138349438	8.8	8.8%_68r	chr5	138349438	FAM53C	EXON	62	0	0	6	68	59	0	0	0	59	6	68	0	59	chr5_138349438
chr5	138349555	138349555	7	7.0%_43r	chr5	138349555	FAM53C	EXON	40	0	0	3	43	35	0	0	0	35	3	43	0	35	chr5_138349555
chr5	119121021	119121021	19.2	19.2%_26r	chr5	119121021	DMXL1	EXON	21	0	0	5	26	24	0	0	0	24	5	26	0	24	chr5_119121021
chr5	119121039	119121039	8.7	8.7%_23r	chr5	119121039	DMXL1	EXON	21	0	0	2	23	28	0	0	0	28	2	23	0	28	chr5_119121039
chr5	100535783	100535783	9.5	9.5%_21r	chr5	100535783	FAM174A	EXON	19	0	0	2	21	12	0	0	0	12	2	21	0	12	chr5_100535783
chr5	100535787	100535787	13.6	13.6%_22r	chr5	100535787	FAM174A	EXON	19	0	0	3	22	15	0	0	0	15	3	22	0	15	chr5_100535787
chr5	100535882	100535882	8.3	8.3%_24r	chr5	100535882	FAM174A	EXON	22	0	0	2	24	12	0	0	0	12	2	24	0	12	chr5_100535882
chr5	100535895	100535895	11.5	11.5%_26r	chr5	100535895	FAM174A	EXON	23	0	0	3	26	15	0	0	0	15	3	26	0	15	chr5_100535895
chr5	100586372	100586372	6.2	6.2%_32r	chr5	100586372	FAM174A	EXON	30	0	0	2	32	20	0	0	0	20	2	32	0	20	chr5_100586372
chr5	40762551	40762551	13.3	13.3%_30r	chr5	40762551	PRKAA1	EXON	0	26	4	0	30	0	27	0	0	27	4	30	0	27	chr5_40762551
chr5	40765092	40765092	9.7	9.7%_31r	chr5	40765092	PRKAA1	EXON	0	28	3	0	31	0	38	0	0	38	3	31	0	38	chr5_40765092
chr5	40765177	40765177	10.1	10.1%_79r	chr5	40765177	PRKAA1	EXON	0	71	8	0	79	0	42	0	0	42	8	79	0	42	chr5_40765177
chr5	138468924	138468924	21.3	21.3%_47r	chr5	138468924	EGR1	EXON	37	0	0	10	47	42	0	0	0	42	10	47	0	42	chr5_138468924
chr5	141515445	141515445	6.5	6.5%_31r	chr5	141515445	DIAPH1	EXON	0	29	2	0	31	0	20	0	0	20	2	31	0	20	chr5_141515445
chr5	6620168	6620168	7.9	7.9%_63r	chr5	6620168	NSUN2	EXON	0	58	5	0	63	1	97	0	0	98	5	63	0	98	chr5_6620168
chr5	6632642	6632642	9.8	9.8%_51r	chr5	6632642	NSUN2	EXON	0	46	5	0	51	0	102	0	0	102	5	51	0	102	chr5_6632642
chr5	157732884	157732884	33.3	33.3%_21r	chr5	157732884	THG1L	EXON	14	0	0	7	21	12	0	0	0	12	7	21	0	12	chr5_157732884
chr5	157732885	157732885	18.2	18.2%_22r	chr5	157732885	THG1L	EXON	18	0	0	4	22	15	0	0	0	15	4	22	0	15	chr5_157732885
chr5	157732899	157732899	14.3	14.3%_21r	chr5	157732899	THG1L	EXON	18	0	0	3	21	18	0	0	0	18	3	21	0	18	chr5_157732899
chr5	157733011	157733011	25.8	25.8%_31r	chr5	157733011	THG1L	EXON	23	0	0	8	31	24	0	0	0	24	8	31	0	24	chr5_157733011
chr5	157734577	157734577	9.1	9.1%_22r	chr5	157734577	THG1L	EXON	20	0	0	2	22	14	0	0	0	14	2	22	0	14	chr5_157734577
chr5	157739552	157739552	17.1	17.1%_35r	chr5	157739552	THG1L	EXON	29	0	0	6	35	30	0	0	0	30	6	35	0	30	chr5_157739552
chr5	40714704	40714704	13.6	13.6%_22r	chr5	40714704	TTC33	EXON	0	19	3	0	22	0	13	0	0	13	3	22	0	13	chr5_40714704
chr5	40714928	40714928	13.9	13.9%_36r	chr5	40714928	TTC33	EXON	0	31	5	0	36	0	30	0	0	30	5	36	0	30	chr5_40714928
chr5	40715529	40715529	7.7	7.7%_26r	chr5	40715529	TTC33	EXON	0	24	2	0	26	0	16	0	0	16	2	26	0	16	chr5_40715529
chr5	40715743	40715743	6.1	6.1%_33r	chr5	40715743	TTC33	EXON	0	31	2	0	33	0	27	0	0	27	2	33	0	27	chr5_40715743
chr5	40715745	40715745	12.1	12.1%_33r	chr5	40715745	TTC33	EXON	0	29	4	0	33	0	30	0	0	30	4	33	0	30	chr5_40715745
chr5	40715747	40715747	18.8	18.8%_32r	chr5	40715747	TTC33	EXON	0	26	6	0	32	0	30	0	0	30	6	32	0	30	chr5_40715747
chr5	40715748	40715748	12.5	12.5%_32r	chr5	40715748	TTC33	EXON	0	28	4	0	32	0	30	0	0	30	4	32	0	30	chr5_40715748
chr5	40716144	40716144	9.4	9.4%_32r	chr5	40716144	TTC33	EXON	0	29	3	0	32	0	21	0	0	21	3	32	0	21	chr5_40716144
chr5	40716251	40716251	6.2	6.2%_32r	chr5	40716251	TTC33	EXON	0	30	2	0	32	0	23	0	0	23	2	32	0	23	chr5_40716251
chr5	40716445	40716445	6.9	6.9%_29r	chr5	40716445	TTC33	EXON	0	27	2	0	29	0	34	0	0	34	2	29	0	34	chr5_40716445
chr5	62591581	62591581	11.5	11.5%_26r	chr5	62591581	IPO11-LRRC70	EXON	23	0	0	3	26	24	0	0	0	24	3	26	0	24	chr5_62591581
chr5	62627215	62627215	10	10.0%_20r	chr5	62627215	IPO11-LRRC70	EXON	18	0	0	2	20	21	0	0	0	21	2	20	0	21	chr5_62627215
chr5	62627357	62627357	26.1	26.1%_23r	chr5	62627357	IPO11-LRRC70	EXON	17	0	0	6	23	19	0	0	0	19	6	23	0	19	chr5_62627357
chr5	62628337	62628337	10	10.0%_20r	chr5	62628337	IPO11-LRRC70	EXON	18	0	0	2	20	14	0	0	0	14	2	20	0	14	chr5_62628337
chr5	62628338	62628338	10	10.0%_20r	chr5	62628338	IPO11-LRRC70	EXON	18	0	0	2	20	14	0	0	0	14	2	20	0	14	chr5_62628338
chr5	62628348	62628348	9.5	9.5%_21r	chr5	62628348	IPO11-LRRC70	EXON	19	0	0	2	21	17	0	0	0	17	2	21	0	17	chr5_62628348
chr5	62628404	62628404	16.1	16.1%_31r	chr5	62628404	IPO11-LRRC70	EXON	26	0	0	5	31	17	0	0	0	17	5	31	0	17	chr5_62628404
chr5	62628415	62628415	6.5	6.5%_31r	chr5	62628415	IPO11-LRRC70	EXON	28	1	0	2	31	19	0	0	0	19	2	31	0	19	chr5_62628415
chr5	33989244	33989244	7.7	7.7%_26r	chr5	33989244	C1QTNF3-AMACR	EXON	0	23	2	1	26	0	27	0	0	27	2	26	0	27	chr5_33989244
chr5	126777459	126777459	10	10.0%_20r	chr5	126777459	LMNB1	EXON	18	0	0	2	20	22	0	0	0	22	2	20	0	22	chr5_126777459
chr5	126777654	126777654	8	8.0%_25r	chr5	126777654	LMNB1	EXON	23	0	0	2	25	17	0	0	0	17	2	25	0	17	chr5_126777654
chr5	126777839	126777839	14.3	14.3%_21r	chr5	126777839	LMNB1	EXON	18	0	0	3	21	17	0	0	0	17	3	21	0	17	chr5_126777839
chr5	126777840	126777840	13.6	13.6%_22r	chr5	126777840	LMNB1	EXON	19	0	0	3	22	15	0	2	0	17	3	22	0	17	chr5_126777840
chr5	126777847	126777847	10	10.0%_20r	chr5	126777847	LMNB1	EXON	18	0	0	2	20	15	0	2	0	17	2	20	0	17	chr5_126777847
chr5	126811832	126811832	6.5	6.5%_31r	chr5	126811832	LMNB1	EXON	29	0	0	2	31	27	0	0	0	27	2	31	0	27	chr5_126811832
chr5	126811845	126811845	24	24.0%_25r	chr5	126811845	LMNB1	EXON	19	0	0	6	25	34	0	0	0	34	6	25	0	34	chr5_126811845
chr5	126819029	126819029	11.5	11.5%_26r	chr5	126819029	LMNB1	EXON	23	0	0	3	26	23	0	0	0	23	3	26	0	23	chr5_126819029
chr5	175516647	175516647	12.5	12.5%_216r	chr5	175516647	SFXN1	EXON	189	0	0	27	216	225	0	0	0	225	27	216	0	225	chr5_175516647
chr5	175526679	175526679	40.1	40.1%_207r	chr5	175526679	SFXN1	EXON	124	0	0	83	207	181	0	0	0	181	83	207	0	181	chr5_175526679
chr5	175526907	175526907	23	23.0%_235r	chr5	175526907	SFXN1	EXON	181	0	0	54	235	233	1	0	0	234	54	235	0	234	chr5_175526907
chr5	175527291	175527291	6.6	6.6%_121r	chr5	175527291	SFXN1	EXON	113	0	0	8	121	98	0	0	0	98	8	121	0	98	chr5_175527291
chr5	175527296	175527296	8.2	8.2%_122r	chr5	175527296	SFXN1	EXON	112	0	0	10	122	101	0	0	0	101	10	122	0	101	chr5_175527296
chr5	175527434	175527434	28.6	28.6%_126r	chr5	175527434	SFXN1	EXON	90	0	0	36	126	116	0	0	0	116	36	126	0	116	chr5_175527434
chr5	175527603	175527603	7.2	7.2%_111r	chr5	175527603	SFXN1	EXON	103	0	0	8	111	91	0	0	0	91	8	111	0	91	chr5_175527603
chr5	175527642	175527642	13.1	13.1%_175r	chr5	175527642	SFXN1	EXON	152	0	0	23	175	167	0	0	0	167	23	175	0	167	chr5_175527642
chr5	175527644	175527644	22.9	22.9%_175r	chr5	175527644	SFXN1	EXON	134	1	0	40	175	170	0	0	0	170	40	175	0	170	chr5_175527644
chr5	175527835	175527835	6.3	6.3%_127r	chr5	175527835	SFXN1	EXON	119	0	0	8	127	107	1	0	0	108	8	127	0	108	chr5_175527835
chr5	175527975	175527975	11.8	11.8%_76r	chr5	175527975	SFXN1	EXON	67	0	0	9	76	75	0	0	0	75	9	76	0	75	chr5_175527975
chr5	175528283	175528283	22.2	22.2%_144r	chr5	175528283	SFXN1	EXON	112	0	0	32	144	117	0	1	0	118	32	144	0	118	chr5_175528283
chr5	175528317	175528317	21.9	21.9%_183r	chr5	175528317	SFXN1	EXON	143	0	0	40	183	149	0	0	0	149	40	183	0	149	chr5_175528317
chr5	175528422	175528422	6.6	6.6%_106r	chr5	175528422	SFXN1	EXON	99	0	0	7	106	73	0	0	0	73	7	106	0	73	chr5_175528422
chr5	175528462	175528462	6.7	6.7%_163r	chr5	175528462	SFXN1	EXON	152	0	0	11	163	105	0	0	0	105	11	163	0	105	chr5_175528462
chr5	175528468	175528468	11	11.0%_173r	chr5	175528468	SFXN1	EXON	153	1	0	19	173	114	0	0	0	114	19	173	0	114	chr5_175528468
chr5	175529215	175529215	23.8	23.8%_21r	chr5	175529215	SFXN1	EXON	16	0	0	5	21	15	0	0	0	15	5	21	0	15	chr5_175529215
chr5	88195712	88195712	15.4	15.4%_26r	chr5	88195712	TMEM161B	EXON	0	22	4	0	26	0	15	0	0	15	4	26	0	15	chr5_88195712
chr5	88195970	88195970	11.1	11.1%_27r	chr5	88195970	TMEM161B	EXON	0	24	3	0	27	0	22	0	0	22	3	27	0	22	chr5_88195970
chr5	27472458	27472458	6.7	6.7%_45r	chr5	27472458	PURPL	EXON	42	0	0	3	45	39	0	0	0	39	3	45	0	39	chr5_27472458
chr5	27485108	27485108	9.1	9.1%_22r	chr5	27485108	PURPL	INTRON	20	0	0	2	22	18	0	0	0	18	2	22	0	18	chr5_27485108
chr5	136154117	136154117	6.7	6.7%_45r	chr5	136154117	SMAD5	EXON	42	0	0	3	45	26	0	0	0	26	3	45	0	26	chr5_136154117
chr5	136181364	136181364	9.1	9.1%_22r	chr5	136181364	SMAD5	EXON	20	0	0	2	22	12	0	0	0	12	2	22	0	12	chr5_136181364
chr5	136182675	136182675	6.9	6.9%_29r	chr5	136182675	SMAD5	EXON	27	0	0	2	29	19	0	0	0	19	2	29	0	19	chr5_136182675
chr5	64718308	64718308	9.1	9.1%_22r	chr5	64718308	SREK1IP1	EXON	0	20	2	0	22	0	20	0	0	20	2	22	0	20	chr5_64718308
chr5	64721143	64721143	9.5	9.5%_21r	chr5	64721143	SREK1IP1	EXON	0	19	2	0	21	0	11	0	0	11	2	21	0	11	chr5_64721143
chr5	64721194	64721194	7.7	7.7%_26r	chr5	64721194	SREK1IP1	EXON	0	24	2	0	26	0	17	0	0	17	2	26	0	17	chr5_64721194
chr5	64724159	64724159	16.7	16.7%_24r	chr5	64724159	SREK1IP1	EXON	0	20	4	0	24	0	11	0	0	11	4	24	0	11	chr5_64724159
chr5	140445974	140445974	8.3	8.3%_24r	chr5	140445974	ANKHD1-EIF4EBP3	EXON	22	0	0	2	24	33	0	0	0	33	2	24	0	33	chr5_140445974
chr5	149369029	149369029	7	7.0%_43r	chr5	149369029	PCYOX1L	EXON	40	0	0	3	43	29	0	0	0	29	3	43	0	29	chr5_149369029
chr5	138286098	138286098	6.1	6.1%_49r	chr5	138286098	CDC25C	EXON	0	46	3	0	49	0	46	0	0	46	3	49	0	46	chr5_138286098
chr5	138286499	138286499	7.4	7.4%_27r	chr5	138286499	CDC25C	EXON	0	25	2	0	27	0	33	0	0	33	2	27	0	33	chr5_138286499
chr5	138287170	138287170	10.7	10.7%_28r	chr5	138287170	CDC25C	EXON	0	25	3	0	28	0	41	0	0	41	3	28	0	41	chr5_138287170
chr5	138290678	138290678	7.7	7.7%_26r	chr5	138290678	CDC25C	EXON	0	24	2	0	26	0	19	0	0	19	2	26	0	19	chr5_138290678
chr5	109334807	109334807	6.2	6.2%_32r	chr5	109334807	PJA2	EXON	0	30	2	0	32	0	12	0	0	12	2	32	0	12	chr5_109334807
chr5	109335091	109335091	6.5	6.5%_31r	chr5	109335091	PJA2	EXON	0	29	2	0	31	0	19	0	0	19	2	31	0	19	chr5_109335091
chr5	109335449	109335449	7.9	7.9%_63r	chr5	109335449	PJA2	EXON	0	58	5	0	63	0	32	0	0	32	5	63	0	32	chr5_109335449
chr5	109335480	109335480	23.1	23.1%_52r	chr5	109335480	PJA2	EXON	0	40	12	0	52	0	32	0	0	32	12	52	0	32	chr5_109335480
chr5	109335778	109335778	12.5	12.5%_40r	chr5	109335778	PJA2	EXON	0	35	5	0	40	0	29	0	0	29	5	40	0	29	chr5_109335778
chr5	109335784	109335784	8.3	8.3%_36r	chr5	109335784	PJA2	EXON	0	33	3	0	36	0	29	0	0	29	3	36	0	29	chr5_109335784
chr5	109335962	109335962	17.4	17.4%_23r	chr5	109335962	PJA2	EXON	0	19	4	0	23	0	35	0	0	35	4	23	0	35	chr5_109335962
chr5	109336133	109336133	6.8	6.8%_44r	chr5	109336133	PJA2	EXON	0	41	3	0	44	0	24	0	0	24	3	44	0	24	chr5_109336133
chr5	109336143	109336143	10.4	10.4%_48r	chr5	109336143	PJA2	EXON	0	43	5	0	48	0	28	0	0	28	5	48	0	28	chr5_109336143
chr5	109336367	109336367	23.1	23.1%_26r	chr5	109336367	PJA2	EXON	0	20	6	0	26	0	16	0	0	16	6	26	0	16	chr5_109336367
chr5	109336979	109336979	7.1	7.1%_28r	chr5	109336979	PJA2	EXON	0	26	2	0	28	0	23	0	0	23	2	28	0	23	chr5_109336979
chr5	109337102	109337102	36.7	36.7%_49r	chr5	109337102	PJA2	EXON	0	31	18	0	49	0	24	0	0	24	18	49	0	24	chr5_109337102
chr5	109337103	109337103	9.3	9.3%_54r	chr5	109337103	PJA2	EXON	0	49	5	0	54	0	29	0	0	29	5	54	0	29	chr5_109337103
chr5	109337106	109337106	8.9	8.9%_56r	chr5	109337106	PJA2	EXON	0	51	5	0	56	0	29	0	0	29	5	56	0	29	chr5_109337106
chr5	109337148	109337148	8.3	8.3%_24r	chr5	109337148	PJA2	EXON	0	22	2	0	24	0	20	0	0	20	2	24	0	20	chr5_109337148
chr5	109337150	109337150	7.1	7.1%_28r	chr5	109337150	PJA2	EXON	0	26	2	0	28	0	21	0	0	21	2	28	0	21	chr5_109337150
chr5	109344715	109344715	6.8	6.8%_44r	chr5	109344715	PJA2	EXON	0	41	3	0	44	0	38	0	0	38	3	44	0	38	chr5_109344715
chr5	109355939	109355939	12.5	12.5%_48r	chr5	109355939	PJA2	EXON	0	42	6	0	48	0	34	0	0	34	6	48	0	34	chr5_109355939
chr5	109355942	109355942	15	15.0%_40r	chr5	109355942	PJA2	EXON	0	34	6	0	40	0	34	0	0	34	6	40	0	34	chr5_109355942
chr5	109355952	109355952	22.2	22.2%_36r	chr5	109355952	PJA2	EXON	0	28	8	0	36	0	40	0	0	40	8	36	0	40	chr5_109355952
chr5	109355987	109355987	14.8	14.8%_27r	chr5	109355987	PJA2	EXON	0	23	4	0	27	0	33	0	0	33	4	27	0	33	chr5_109355987
chr5	109368581	109368581	7.7	7.7%_39r	chr5	109368581	PJA2	EXON	0	36	3	0	39	0	29	0	0	29	3	39	0	29	chr5_109368581
chr5	109368639	109368639	8.3	8.3%_36r	chr5	109368639	PJA2	EXON	0	33	3	0	36	0	22	0	0	22	3	36	0	22	chr5_109368639
chr5	109368683	109368683	11.4	11.4%_35r	chr5	109368683	PJA2	EXON	0	31	4	0	35	0	39	0	0	39	4	35	0	39	chr5_109368683
chr5	109368685	109368685	21.6	21.6%_37r	chr5	109368685	PJA2	EXON	0	29	8	0	37	0	41	0	0	41	8	37	0	41	chr5_109368685
chr5	109368686	109368686	13.2	13.2%_38r	chr5	109368686	PJA2	EXON	0	33	5	0	38	0	43	0	0	43	5	38	0	43	chr5_109368686
chr5	109378272	109378272	6.2	6.2%_32r	chr5	109378272	PJA2	EXON	0	30	2	0	32	0	17	0	0	17	2	32	0	17	chr5_109378272
chr5	109379024	109379024	18.6	18.6%_43r	chr5	109379024	PJA2	EXON	0	35	8	0	43	0	54	0	0	54	8	43	0	54	chr5_109379024
chr5	109379033	109379033	6.8	6.8%_44r	chr5	109379033	PJA2	EXON	0	41	3	0	44	0	56	0	0	56	3	44	0	56	chr5_109379033
chr5	149348291	149348291	8.3	8.3%_24r	chr5	149348291	GRPEL2	EXON	22	0	0	2	24	25	0	1	0	26	2	24	0	26	chr5_149348291
chr5	149348423	149348423	10	10.0%_40r	chr5	149348423	GRPEL2	EXON	36	0	0	4	40	47	0	0	0	47	4	40	0	47	chr5_149348423
chr5	149351013	149351013	6.2	6.2%_32r	chr5	149351013	GRPEL2	EXON	30	0	0	2	32	40	0	0	0	40	2	32	0	40	chr5_149351013
chr5	149351029	149351029	11.8	11.8%_34r	chr5	149351029	GRPEL2	EXON	30	0	0	4	34	56	0	0	0	56	4	34	0	56	chr5_149351029
chr5	149351054	149351054	21.6	21.6%_37r	chr5	149351054	GRPEL2	EXON	29	0	0	8	37	41	0	0	0	41	8	37	0	41	chr5_149351054
chr5	149351504	149351504	8.1	8.1%_37r	chr5	149351504	GRPEL2	EXON	34	0	0	3	37	36	0	0	0	36	3	37	0	36	chr5_149351504
chr5	149351602	149351602	10.4	10.4%_48r	chr5	149351602	GRPEL2	EXON	43	0	0	5	48	49	0	0	0	49	5	48	0	49	chr5_149351602
chr5	149351893	149351893	7	7.0%_43r	chr5	149351893	GRPEL2	EXON	40	0	0	3	43	39	0	0	0	39	3	43	0	39	chr5_149351893
chr5	149351933	149351933	19.4	19.4%_31r	chr5	149351933	GRPEL2	EXON	24	0	1	6	31	30	0	0	0	30	6	31	0	30	chr5_149351933
chr5	149353337	149353337	26.7	26.7%_30r	chr5	149353337	GRPEL2	EXON	22	0	0	8	30	22	0	0	0	22	8	30	0	22	chr5_149353337
chr5	149353499	149353499	8.1	8.1%_37r	chr5	149353499	GRPEL2	EXON	33	0	1	3	37	34	0	0	0	34	3	37	0	34	chr5_149353499
chr5	149354095	149354095	6.8	6.8%_88r	chr5	149354095	GRPEL2	EXON	82	0	0	6	88	90	0	0	0	90	6	88	0	90	chr5_149354095
chr5	149354334	149354334	6.6	6.6%_76r	chr5	149354334	GRPEL2	EXON	71	0	0	5	76	75	0	0	0	75	5	76	0	75	chr5_149354334
chr5	10279993	10279993	36.7	36.7%_30r	chr5	10279993	CMBL	EXON	0	19	11	0	30	0	35	0	0	35	11	30	0	35	chr5_10279993
chr5	90495685	90495685	7.7	7.7%_26r	chr5	90495685	POLR3G	EXON	24	0	0	2	26	19	0	0	0	19	2	26	0	19	chr5_90495685
chr5	90495689	90495689	14.8	14.8%_27r	chr5	90495689	POLR3G	EXON	23	0	0	4	27	19	0	0	0	19	4	27	0	19	chr5_90495689
chr5	103133575	103133575	8.3	8.3%_36r	chr5	103133575	PPIP5K2	EXON	32	1	0	3	36	23	0	0	0	23	3	36	0	23	chr5_103133575
chr5	103146594	103146594	10	10.0%_20r	chr5	103146594	PPIP5K2	EXON	18	0	0	2	20	12	0	0	0	12	2	20	0	12	chr5_103146594
chr5	103149223	103149223	14.8	14.8%_27r	chr5	103149223	PPIP5K2	EXON	23	0	0	4	27	18	0	0	0	18	4	27	0	18	chr5_103149223
chr5	103149248	103149248	10.3	10.3%_29r	chr5	103149248	PPIP5K2	EXON	26	0	0	3	29	22	0	0	0	22	3	29	0	22	chr5_103149248
chr5	109869405	109869405	14.3	14.3%_21r	chr5	109869405	MAN2A1	EXON	18	0	0	3	21	21	0	0	0	21	3	21	0	21	chr5_109869405
chr5	109869408	109869408	13.6	13.6%_22r	chr5	109869408	MAN2A1	EXON	19	0	0	3	22	20	0	0	0	20	3	22	0	20	chr5_109869408
chr5	60874061	60874061	9.1	9.1%_22r	chr5	60874061	ERCC8	EXON	0	20	2	0	22	0	17	0	0	17	2	22	0	17	chr5_60874061
chr5	60890972	60890972	9.5	9.5%_42r	chr5	60890972	ERCC8	EXON	0	38	4	0	42	0	44	0	0	44	4	42	0	44	chr5_60890972
chr5	60891020	60891020	7.1	7.1%_28r	chr5	60891020	ERCC8	EXON	0	26	2	0	28	0	16	0	0	16	2	28	0	16	chr5_60891020
chr5	60898366	60898366	8.2	8.2%_49r	chr5	60898366	ERCC8	EXON	0	45	4	0	49	0	37	0	0	37	4	49	0	37	chr5_60898366
chr5	60903694	60903694	6.8	6.8%_44r	chr5	60903694	ERCC8	EXON	0	41	3	0	44	0	27	0	0	27	3	44	0	27	chr5_60903694
chr5	60903708	60903708	11.9	11.9%_42r	chr5	60903708	ERCC8	EXON	0	37	5	0	42	0	33	0	0	33	5	42	0	33	chr5_60903708
chr5	60918312	60918312	6.4	6.4%_47r	chr5	60918312	ERCC8	EXON	0	44	3	0	47	0	41	0	0	41	3	47	0	41	chr5_60918312
chr5	10390392	10390392	9	9.0%_67r	chr5	10390392	MARCHF6	EXON	61	0	0	6	67	89	0	0	0	89	6	67	0	89	chr5_10390392
chr5	10390467	10390467	14.5	14.5%_62r	chr5	10390467	MARCHF6	EXON	52	0	1	9	62	54	0	0	0	54	9	62	0	54	chr5_10390467
chr5	10403410	10403410	8.7	8.7%_46r	chr5	10403410	MARCHF6	EXON	42	0	0	4	46	44	0	0	0	44	4	46	0	44	chr5_10403410
chr5	10403430	10403430	9.3	9.3%_54r	chr5	10403430	MARCHF6	EXON	49	0	0	5	54	58	0	0	0	58	5	54	0	58	chr5_10403430
chr5	10405660	10405660	9.8	9.8%_61r	chr5	10405660	MARCHF6	EXON	55	0	0	6	61	41	1	0	0	42	6	61	0	42	chr5_10405660
chr5	10405674	10405674	8.2	8.2%_49r	chr5	10405674	MARCHF6	EXON	45	0	0	4	49	48	0	0	0	48	4	49	0	48	chr5_10405674
chr5	10410183	10410183	15.6	15.6%_45r	chr5	10410183	MARCHF6	EXON	38	0	0	7	45	52	0	0	0	52	7	45	0	52	chr5_10410183
chr5	10410208	10410208	7.1	7.1%_56r	chr5	10410208	MARCHF6	EXON	52	0	0	4	56	55	0	0	0	55	4	56	0	55	chr5_10410208
chr5	10410225	10410225	8.7	8.7%_46r	chr5	10410225	MARCHF6	EXON	42	0	0	4	46	50	0	0	0	50	4	46	0	50	chr5_10410225
chr5	10410233	10410233	13	13.0%_46r	chr5	10410233	MARCHF6	EXON	40	0	0	6	46	52	0	0	0	52	6	46	0	52	chr5_10410233
chr5	10411366	10411366	10.3	10.3%_39r	chr5	10411366	MARCHF6	EXON	35	0	0	4	39	51	0	0	0	51	4	39	0	51	chr5_10411366
chr5	10411468	10411468	12.5	12.5%_56r	chr5	10411468	MARCHF6	EXON	49	0	0	7	56	44	0	0	0	44	7	56	0	44	chr5_10411468
chr5	10415508	10415508	6.5	6.5%_46r	chr5	10415508	MARCHF6	EXON	43	0	0	3	46	47	0	0	0	47	3	46	0	47	chr5_10415508
chr5	10415589	10415589	9.1	9.1%_66r	chr5	10415589	MARCHF6	EXON	60	0	0	6	66	72	0	0	0	72	6	66	0	72	chr5_10415589
chr5	10433623	10433623	8.3	8.3%_36r	chr5	10433623	MARCHF6	EXON	33	0	0	3	36	40	0	0	0	40	3	36	0	40	chr5_10433623
chr5	10433835	10433835	18.8	18.8%_32r	chr5	10433835	MARCHF6	EXON	26	0	0	6	32	22	0	0	0	22	6	32	0	22	chr5_10433835
chr5	10435872	10435872	16.1	16.1%_87r	chr5	10435872	MARCHF6	EXON	73	0	0	14	87	78	0	0	0	78	14	87	0	78	chr5_10435872
chr5	10436713	10436713	9.9	9.9%_142r	chr5	10436713	MARCHF6	EXON	128	0	0	14	142	106	0	0	0	106	14	142	0	106	chr5_10436713
chr5	10436737	10436737	8	8.0%_100r	chr5	10436737	MARCHF6	EXON	92	0	0	8	100	79	0	0	0	79	8	100	0	79	chr5_10436737
chr5	10436831	10436831	10.4	10.4%_115r	chr5	10436831	MARCHF6	EXON	103	0	0	12	115	104	1	0	0	105	12	115	0	105	chr5_10436831
chr5	10436832	10436832	9.6	9.6%_114r	chr5	10436832	MARCHF6	EXON	102	1	0	11	114	105	0	0	0	105	11	114	0	105	chr5_10436832
chr5	10437481	10437481	7.8	7.8%_64r	chr5	10437481	MARCHF6	EXON	59	0	0	5	64	49	0	0	0	49	5	64	0	49	chr5_10437481
chr5	10437494	10437494	7.1	7.1%_85r	chr5	10437494	MARCHF6	EXON	79	0	0	6	85	80	0	0	0	80	6	85	0	80	chr5_10437494
chr5	10437553	10437553	16.7	16.7%_102r	chr5	10437553	MARCHF6	EXON	85	0	0	17	102	84	0	0	0	84	17	102	0	84	chr5_10437553
chr5	10437614	10437614	12.7	12.7%_79r	chr5	10437614	MARCHF6	EXON	69	0	0	10	79	63	0	0	0	63	10	79	0	63	chr5_10437614
chr5	10437661	10437661	26.7	26.7%_60r	chr5	10437661	MARCHF6	EXON	44	0	0	16	60	38	0	0	0	38	16	60	0	38	chr5_10437661
chr5	10437816	10437816	13.6	13.6%_59r	chr5	10437816	MARCHF6	EXON	51	0	0	8	59	28	0	0	0	28	8	59	0	28	chr5_10437816
chr5	131391984	131391984	9.5	9.5%_21r	chr5	131391984	CDC42SE2	EXON	19	0	0	2	21	25	0	0	0	25	2	21	0	25	chr5_131391984
chr5	131392336	131392336	15	15.0%_20r	chr5	131392336	CDC42SE2	EXON	17	0	0	3	20	11	0	0	0	11	3	20	0	11	chr5_131392336
chr5	131392432	131392432	19	19.0%_21r	chr5	131392432	CDC42SE2	EXON	17	0	0	4	21	17	0	0	0	17	4	21	0	17	chr5_131392432
chr5	131393136	131393136	8.3	8.3%_24r	chr5	131393136	CDC42SE2	EXON	22	0	0	2	24	22	0	0	0	22	2	24	0	22	chr5_131393136
chr5	131393277	131393277	10	10.0%_20r	chr5	131393277	CDC42SE2	EXON	18	0	0	2	20	14	0	0	0	14	2	20	0	14	chr5_131393277
chr5	131394169	131394169	8.3	8.3%_24r	chr5	131394169	CDC42SE2	EXON	22	0	0	2	24	19	0	0	0	19	2	24	0	19	chr5_131394169
chr5	131394473	131394473	15.2	15.2%_33r	chr5	131394473	CDC42SE2	EXON	28	0	0	5	33	11	0	1	0	12	5	33	0	12	chr5_131394473
chr5	132692983	132692983	10.7	10.7%_28r	chr5	132692983	KIF3A	EXON	0	25	3	0	28	0	32	0	0	32	3	28	0	32	chr5_132692983
chr5	132737421	132737421	8	8.0%_25r	chr5	132737421	KIF3A	EXON	0	22	2	1	25	0	18	0	0	18	2	25	0	18	chr5_132737421
chr5	132737435	132737435	16.7	16.7%_24r	chr5	132737435	KIF3A	EXON	0	20	4	0	24	0	16	0	0	16	4	24	0	16	chr5_132737435
chr5	132737481	132737481	20	20.0%_25r	chr5	132737481	KIF3A	EXON	0	20	5	0	25	0	23	0	0	23	5	25	0	23	chr5_132737481
chr5	116134177	116134177	9.8	9.8%_41r	chr5	116134177	COMMD10	EXON	37	0	0	4	41	26	0	0	0	26	4	41	0	26	chr5_116134177
chr5	116292817	116292817	6.2	6.2%_65r	chr5	116292817	COMMD10	EXON	61	0	0	4	65	49	0	0	0	49	4	65	0	49	chr5_116292817
chr5	116293014	116293014	34.1	34.1%_44r	chr5	116293014	COMMD10	EXON	29	0	0	15	44	31	0	0	0	31	15	44	0	31	chr5_116293014
chr5	61158782	61158782	29.1	29.1%_55r	chr5	61158782	SMIM15	EXON	0	39	16	0	55	0	46	0	0	46	16	55	0	46	chr5_61158782
chr5	61159782	61159782	6.5	6.5%_77r	chr5	61159782	SMIM15	EXON	0	72	5	0	77	0	67	0	0	67	5	77	0	67	chr5_61159782
chr5	57175931	57175931	7.7	7.7%_78r	chr5	57175931	GPBP1	EXON	72	0	0	6	78	62	0	0	0	62	6	78	0	62	chr5_57175931
chr5	57231156	57231156	7.3	7.3%_124r	chr5	57231156	GPBP1	EXON	115	0	0	9	124	80	0	0	0	80	9	124	0	80	chr5_57231156
chr5	57231179	57231179	8.8	8.8%_137r	chr5	57231179	GPBP1	EXON	125	0	0	12	137	98	0	0	0	98	12	137	0	98	chr5_57231179
chr5	57246323	57246323	6.7	6.7%_104r	chr5	57246323	GPBP1	EXON	97	0	0	7	104	110	0	0	0	110	7	104	0	110	chr5_57246323
chr5	57249537	57249537	7.1	7.1%_154r	chr5	57249537	GPBP1	EXON	143	0	0	11	154	120	0	0	0	120	11	154	0	120	chr5_57249537
chr5	57249575	57249575	22.5	22.5%_111r	chr5	57249575	GPBP1	EXON	85	0	1	25	111	86	0	0	0	86	25	111	0	86	chr5_57249575
chr5	57251140	57251140	9.4	9.4%_64r	chr5	57251140	GPBP1	EXON	58	0	0	6	64	66	0	0	0	66	6	64	0	66	chr5_57251140
chr5	57261207	57261207	11.7	11.7%_103r	chr5	57261207	GPBP1	EXON	91	0	0	12	103	96	0	0	0	96	12	103	0	96	chr5_57261207
chr5	57262686	57262686	9.4	9.4%_96r	chr5	57262686	GPBP1	EXON	87	0	0	9	96	82	0	0	0	82	9	96	0	82	chr5_57262686
chr5	57262708	57262708	6.1	6.1%_98r	chr5	57262708	GPBP1	EXON	92	0	0	6	98	81	0	0	0	81	6	98	0	81	chr5_57262708
chr5	57262717	57262717	9.9	9.9%_111r	chr5	57262717	GPBP1	EXON	100	0	0	11	111	79	0	0	0	79	11	111	0	79	chr5_57262717
chr5	57262772	57262772	28.8	28.8%_104r	chr5	57262772	GPBP1	EXON	73	1	0	30	104	83	0	0	0	83	30	104	0	83	chr5_57262772
chr5	57262850	57262850	7.1	7.1%_84r	chr5	57262850	GPBP1	EXON	78	0	0	6	84	58	0	0	0	58	6	84	0	58	chr5_57262850
chr5	57262957	57262957	32.9	32.9%_85r	chr5	57262957	GPBP1	EXON	56	1	0	28	85	53	0	0	0	53	28	85	0	53	chr5_57262957
chr5	57263003	57263003	11.8	11.8%_68r	chr5	57263003	GPBP1	EXON	60	0	0	8	68	51	0	0	0	51	8	68	0	51	chr5_57263003
chr5	57263168	57263168	9.5	9.5%_21r	chr5	57263168	GPBP1	EXON	19	0	0	2	21	13	0	0	0	13	2	21	0	13	chr5_57263168
chr5	57263181	57263181	14.3	14.3%_21r	chr5	57263181	GPBP1	EXON	18	0	0	3	21	14	0	0	0	14	3	21	0	14	chr5_57263181
chr5	115805314	115805314	20	20.0%_35r	chr5	115805314	CDO1	EXON	0	28	7	0	35	0	52	0	0	52	7	35	0	52	chr5_115805314
chr5	115805320	115805320	9.8	9.8%_41r	chr5	115805320	CDO1	EXON	0	37	4	0	41	0	43	0	0	43	4	41	0	43	chr5_115805320
chr5	115805401	115805401	9.5	9.5%_21r	chr5	115805401	CDO1	EXON	0	19	2	0	21	0	22	0	0	22	2	21	0	22	chr5_115805401
chr5	115813192	115813192	8.7	8.7%_23r	chr5	115813192	CDO1	EXON	0	21	2	0	23	0	17	0	0	17	2	23	0	17	chr5_115813192
chr5	150795904	150795904	7.7	7.7%_26r	chr5	150795904	SMIM3	EXON	24	0	0	2	26	16	0	0	0	16	2	26	0	16	chr5_150795904
chr5	141970812	141970812	6.5	6.5%_46r	chr5	141970812	RNF14	EXON	43	0	0	3	46	28	0	0	0	28	3	46	0	28	chr5_141970812
chr5	141973717	141973717	16.1	16.1%_62r	chr5	141973717	RNF14	EXON	51	1	0	10	62	37	0	0	0	37	10	62	0	37	chr5_141973717
chr5	141974841	141974841	6	6.0%_50r	chr5	141974841	RNF14	EXON	47	0	0	3	50	45	0	0	0	45	3	50	0	45	chr5_141974841
chr5	141974936	141974936	23.3	23.3%_60r	chr5	141974936	RNF14	EXON	45	0	1	14	60	51	0	0	0	51	14	60	0	51	chr5_141974936
chr5	141978533	141978533	8.6	8.6%_81r	chr5	141978533	RNF14	EXON	74	0	0	7	81	74	0	0	0	74	7	81	0	74	chr5_141978533
chr5	141978614	141978614	17.9	17.9%_67r	chr5	141978614	RNF14	EXON	55	0	0	12	67	58	0	0	0	58	12	67	0	58	chr5_141978614
chr5	141978676	141978676	6.9	6.9%_102r	chr5	141978676	RNF14	EXON	93	2	0	7	102	112	0	0	0	112	7	102	0	112	chr5_141978676
chr5	141980128	141980128	14.1	14.1%_71r	chr5	141980128	RNF14	EXON	61	0	0	10	71	85	0	0	0	85	10	71	0	85	chr5_141980128
chr5	141980140	141980140	12.5	12.5%_72r	chr5	141980140	RNF14	EXON	63	0	0	9	72	70	0	0	0	70	9	72	0	70	chr5_141980140
chr5	141980243	141980243	15.7	15.7%_70r	chr5	141980243	RNF14	EXON	59	0	0	11	70	81	0	0	0	81	11	70	0	81	chr5_141980243
chr5	141980247	141980247	7.4	7.4%_68r	chr5	141980247	RNF14	EXON	63	0	0	5	68	80	0	0	0	80	5	68	0	80	chr5_141980247
chr5	141983483	141983483	38.8	38.8%_80r	chr5	141983483	RNF14	EXON	49	0	0	31	80	79	0	0	0	79	31	80	0	79	chr5_141983483
chr5	141983507	141983507	38.5	38.5%_78r	chr5	141983507	RNF14	EXON	48	0	0	30	78	72	0	0	0	72	30	78	0	72	chr5_141983507
chr5	141983511	141983511	6.4	6.4%_78r	chr5	141983511	RNF14	EXON	73	0	0	5	78	77	0	0	0	77	5	78	0	77	chr5_141983511
chr5	141983541	141983541	6.1	6.1%_82r	chr5	141983541	RNF14	EXON	77	0	0	5	82	75	0	0	0	75	5	82	0	75	chr5_141983541
chr5	141984894	141984894	34.4	34.4%_90r	chr5	141984894	RNF14	EXON	59	0	0	31	90	71	0	0	0	71	31	90	0	71	chr5_141984894
chr5	141987805	141987805	13.3	13.3%_98r	chr5	141987805	RNF14	EXON	85	0	0	13	98	92	0	0	0	92	13	98	0	92	chr5_141987805
chr5	141987844	141987844	21.3	21.3%_61r	chr5	141987844	RNF14	EXON	48	0	0	13	61	62	0	0	0	62	13	61	0	62	chr5_141987844
chr5	141987873	141987873	43.6	43.6%_78r	chr5	141987873	RNF14	EXON	44	0	0	34	78	85	0	0	0	85	34	78	0	85	chr5_141987873
chr5	141988202	141988202	14.6	14.6%_48r	chr5	141988202	RNF14	EXON	41	0	0	7	48	43	0	0	0	43	7	48	0	43	chr5_141988202
chr5	141988512	141988512	6.2	6.2%_32r	chr5	141988512	RNF14	EXON	30	0	0	2	32	30	0	0	0	30	2	32	0	30	chr5_141988512
chr5	141988513	141988513	35.7	35.7%_28r	chr5	141988513	RNF14	EXON	18	0	0	10	28	27	0	0	0	27	10	28	0	27	chr5_141988513
chr5	141988546	141988546	53.8	53.8%_26r	chr5	141988546	RNF14	EXON	11	1	0	14	26	24	0	0	0	24	14	26	0	24	chr5_141988546
chr5	141988622	141988622	15	15.0%_40r	chr5	141988622	RNF14	EXON	34	0	0	6	40	25	0	0	0	25	6	40	0	25	chr5_141988622
chr5	141988678	141988678	7.7	7.7%_39r	chr5	141988678	RNF14	EXON	36	0	0	3	39	32	0	0	0	32	3	39	0	32	chr5_141988678
chr5	141988781	141988781	19.7	19.7%_61r	chr5	141988781	RNF14	EXON	49	0	0	12	61	48	0	0	0	48	12	61	0	48	chr5_141988781
chr5	141988865	141988865	6.9	6.9%_29r	chr5	141988865	RNF14	EXON	27	0	0	2	29	27	0	0	0	27	2	29	0	27	chr5_141988865
chr5	141988977	141988977	10	10.0%_20r	chr5	141988977	RNF14	EXON	18	0	0	2	20	24	0	0	0	24	2	20	0	24	chr5_141988977
chr5	141989024	141989024	18.2	18.2%_22r	chr5	141989024	RNF14	EXON	18	0	0	4	22	20	0	0	0	20	4	22	0	20	chr5_141989024
chr5	134156698	134156698	14.3	14.3%_21r	chr5	134156698	SKP1	EXON	1	17	3	0	21	0	16	0	0	16	3	21	0	16	chr5_134156698
chr5	134157312	134157312	7.3	7.3%_41r	chr5	134157312	SKP1	EXON	0	38	3	0	41	0	24	0	0	24	3	41	0	24	chr5_134157312
chr5	134157363	134157363	8	8.0%_25r	chr5	134157363	SKP1	EXON	0	23	2	0	25	0	19	0	0	19	2	25	0	19	chr5_134157363
chr5	134157635	134157635	19.5	19.5%_529r	chr5	134157635	SKP1	EXON	0	426	103	0	529	0	436	0	0	436	103	529	0	436	chr5_134157635
chr5	134157667	134157667	7.5	7.5%_546r	chr5	134157667	SKP1	EXON	0	505	41	0	546	0	426	0	1	427	41	546	0	427	chr5_134157667
chr5	151267315	151267315	9.8	9.8%_41r	chr5	151267315	GM2A	EXON	37	0	0	4	41	45	0	0	0	45	4	41	0	45	chr5_151267315
chr5	151267392	151267392	10	10.0%_50r	chr5	151267392	GM2A	EXON	45	0	0	5	50	37	0	1	0	38	5	50	0	38	chr5_151267392
chr5	151267423	151267423	77.1	77.1%_48r	chr5	151267423	GM2A	EXON	11	0	0	37	48	40	0	0	0	40	37	48	0	40	chr5_151267423
chr5	151267521	151267521	7.1	7.1%_28r	chr5	151267521	GM2A	EXON	26	0	0	2	28	25	0	0	0	25	2	28	0	25	chr5_151267521
chr5	151267754	151267754	8.1	8.1%_37r	chr5	151267754	GM2A	EXON	34	0	0	3	37	34	0	0	0	34	3	37	0	34	chr5_151267754
chr5	151267777	151267777	20.6	20.6%_34r	chr5	151267777	GM2A	EXON	27	0	0	7	34	27	0	0	0	27	7	34	0	27	chr5_151267777
chr5	151268944	151268944	6.7	6.7%_30r	chr5	151268944	GM2A	EXON	28	0	0	2	30	39	0	0	0	39	2	30	0	39	chr5_151268944
chr5	151269006	151269006	11.8	11.8%_34r	chr5	151269006	GM2A	EXON	30	0	0	4	34	22	0	0	0	22	4	34	0	22	chr5_151269006
chr5	151269097	151269097	11.1	11.1%_36r	chr5	151269097	GM2A	EXON	32	0	0	4	36	39	0	0	0	39	4	36	0	39	chr5_151269097
chr5	115580796	115580796	9.1	9.1%_22r	chr5	115580796	TICAM2	EXON	0	20	2	0	22	0	11	0	0	11	2	22	0	11	chr5_115580796
chr5	32354399	32354399	9.4	9.4%_32r	chr5	32354399	ZFR	EXON	0	29	3	0	32	0	13	0	0	13	3	32	0	13	chr5_32354399
chr5	32354536	32354536	9.2	9.2%_65r	chr5	32354536	ZFR	EXON	0	59	6	0	65	0	43	0	0	43	6	65	0	43	chr5_32354536
chr5	32354547	32354547	6.9	6.9%_58r	chr5	32354547	ZFR	EXON	0	54	4	0	58	0	40	0	0	40	4	58	0	40	chr5_32354547
chr5	32354612	32354612	6.5	6.5%_46r	chr5	32354612	ZFR	EXON	0	43	3	0	46	0	33	0	0	33	3	46	0	33	chr5_32354612
chr5	32354615	32354615	43.9	43.9%_41r	chr5	32354615	ZFR	EXON	0	23	18	0	41	0	31	0	0	31	18	41	0	31	chr5_32354615
chr5	32354616	32354616	6.8	6.8%_44r	chr5	32354616	ZFR	EXON	0	41	3	0	44	0	30	0	0	30	3	44	0	30	chr5_32354616
chr5	32354804	32354804	7.9	7.9%_101r	chr5	32354804	ZFR	EXON	0	93	8	0	101	0	85	0	0	85	8	101	0	85	chr5_32354804
chr5	32355198	32355198	15.4	15.4%_65r	chr5	32355198	ZFR	EXON	0	55	10	0	65	0	50	0	0	50	10	65	0	50	chr5_32355198
chr5	32355596	32355596	9.4	9.4%_64r	chr5	32355596	ZFR	EXON	0	58	6	0	64	0	50	0	0	50	6	64	0	50	chr5_32355596
chr5	32355690	32355690	8.2	8.2%_49r	chr5	32355690	ZFR	EXON	0	45	4	0	49	0	59	0	0	59	4	49	0	59	chr5_32355690
chr5	32379138	32379138	14.3	14.3%_56r	chr5	32379138	ZFR	EXON	0	48	8	0	56	0	65	0	0	65	8	56	0	65	chr5_32379138
chr5	32390428	32390428	8.7	8.7%_69r	chr5	32390428	ZFR	EXON	0	63	6	0	69	0	70	0	0	70	6	69	0	70	chr5_32390428
chr5	32406948	32406948	9.7	9.7%_62r	chr5	32406948	ZFR	EXON	0	56	6	0	62	0	60	0	0	60	6	62	0	60	chr5_32406948
chr5	140245156	140245156	7.6	7.6%_119r	chr5	140245156	PFDN1	EXON	0	110	9	0	119	0	93	0	0	93	9	119	0	93	chr5_140245156
chr5	140245447	140245447	10.8	10.8%_325r	chr5	140245447	PFDN1	EXON	0	290	35	0	325	0	264	0	0	264	35	325	0	264	chr5_140245447
chr5	171390073	171390073	6.3	6.3%_726r	chr5	171390073	NPM1	EXON	679	1	0	46	726	603	0	0	0	603	46	726	0	603	chr5_171390073
chr5	171392720	171392720	13.6	13.6%_553r	chr5	171392720	NPM1	EXON	477	0	1	75	553	577	0	0	0	577	75	553	0	577	chr5_171392720
chr5	171392922	171392922	8.3	8.3%_373r	chr5	171392922	NPM1	EXON	341	1	0	31	373	364	0	0	0	364	31	373	0	364	chr5_171392922
chr5	171406589	171406589	18.4	18.4%_185r	chr5	171406589	NPM1	EXON	151	0	0	34	185	136	0	0	0	136	34	185	0	136	chr5_171406589
chr5	171406594	171406594	6.7	6.7%_180r	chr5	171406594	NPM1	EXON	168	0	0	12	180	131	0	0	0	131	12	180	0	131	chr5_171406594
chr5	171410863	171410863	8.4	8.4%_155r	chr5	171410863	NPM1	EXON	142	0	0	13	155	135	0	0	0	135	13	155	0	135	chr5_171410863
chr5	36152911	36152911	6.3	6.3%_111r	chr5	36152911	SKP2	EXON	104	0	0	7	111	79	1	0	0	80	7	111	0	80	chr5_36152911
chr5	36166539	36166539	18.4	18.4%_125r	chr5	36166539	SKP2	EXON	102	0	0	23	125	147	0	0	0	147	23	125	0	147	chr5_36166539
chr5	36168417	36168417	6.5	6.5%_123r	chr5	36168417	SKP2	EXON	115	0	0	8	123	135	0	0	0	135	8	123	0	135	chr5_36168417
chr5	135334462	135334462	10	10.0%_211r	chr5	135334462	MACROH2A1	EXON	0	189	21	1	211	0	146	0	1	147	21	211	0	147	chr5_135334462
chr5	10226508	10226508	24.3	24.3%_37r	chr5	10226508	ATPSCKMT	EXON	0	28	9	0	37	0	19	0	0	19	9	37	0	19	chr5_10226508
chr5	10226716	10226716	10.7	10.7%_28r	chr5	10226716	ATPSCKMT	EXON	0	25	3	0	28	0	20	0	0	20	3	28	0	20	chr5_10226716
chr5	10226905	10226905	17.9	17.9%_28r	chr5	10226905	ATPSCKMT	EXON	0	23	5	0	28	0	17	0	0	17	5	28	0	17	chr5_10226905
chr5	10226980	10226980	14.3	14.3%_21r	chr5	10226980	ATPSCKMT	EXON	0	18	3	0	21	0	11	0	0	11	3	21	0	11	chr5_10226980
chr5	10227193	10227193	8.5	8.5%_47r	chr5	10227193	ATPSCKMT	EXON	0	43	4	0	47	0	32	0	0	32	4	47	0	32	chr5_10227193
chr5	10227195	10227195	17.8	17.8%_45r	chr5	10227195	ATPSCKMT	EXON	0	37	8	0	45	0	32	0	0	32	8	45	0	32	chr5_10227195
chr5	10227201	10227201	10.5	10.5%_38r	chr5	10227201	ATPSCKMT	EXON	0	34	4	0	38	0	29	0	0	29	4	38	0	29	chr5_10227201
chr5	10227204	10227204	16.2	16.2%_37r	chr5	10227204	ATPSCKMT	EXON	0	31	6	0	37	0	27	0	0	27	6	37	0	27	chr5_10227204
chr5	10227284	10227284	12.1	12.1%_33r	chr5	10227284	ATPSCKMT	EXON	0	29	4	0	33	0	18	0	1	19	4	33	0	19	chr5_10227284
chr5	10236479	10236479	13.9	13.9%_36r	chr5	10236479	ATPSCKMT	EXON	0	31	5	0	36	0	25	0	0	25	5	36	0	25	chr5_10236479
chr5	10236556	10236556	13.1	13.1%_61r	chr5	10236556	ATPSCKMT	EXON	0	53	8	0	61	0	45	0	0	45	8	61	0	45	chr5_10236556
chr5	10236575	10236575	7.4	7.4%_68r	chr5	10236575	ATPSCKMT	EXON	0	63	5	0	68	0	44	0	0	44	5	68	0	44	chr5_10236575
chr5	10236586	10236586	6.5	6.5%_62r	chr5	10236586	ATPSCKMT	EXON	0	58	4	0	62	0	43	0	0	43	4	62	0	43	chr5_10236586
chr5	10236588	10236588	22	22.0%_59r	chr5	10236588	ATPSCKMT	EXON	0	46	13	0	59	0	40	0	0	40	13	59	0	40	chr5_10236588
chr5	10236595	10236595	8.1	8.1%_62r	chr5	10236595	ATPSCKMT	EXON	0	57	5	0	62	0	39	0	0	39	5	62	0	39	chr5_10236595
chr5	10239252	10239252	14	14.0%_43r	chr5	10239252	ATPSCKMT	EXON	0	37	6	0	43	0	28	0	0	28	6	43	0	28	chr5_10239252
chr5	177050765	177050765	9.4	9.4%_53r	chr5	177050765	ZNF346	EXON	48	0	0	5	53	54	0	0	0	54	5	53	0	54	chr5_177050765
chr5	177064521	177064521	13.7	13.7%_51r	chr5	177064521	ZNF346	EXON	43	0	1	7	51	56	0	0	0	56	7	51	0	56	chr5_177064521
chr5	177064624	177064624	9.7	9.7%_62r	chr5	177064624	ZNF346	EXON	56	0	0	6	62	44	0	0	0	44	6	62	0	44	chr5_177064624
chr5	177064814	177064814	28.3	28.3%_53r	chr5	177064814	ZNF346	EXON	38	0	0	15	53	27	0	0	0	27	15	53	0	27	chr5_177064814
chr5	177065322	177065322	6.5	6.5%_93r	chr5	177065322	ZNF346	EXON	87	0	0	6	93	68	0	0	0	68	6	93	0	68	chr5_177065322
chr5	177065353	177065353	6.4	6.4%_78r	chr5	177065353	ZNF346	EXON	73	0	0	5	78	65	0	0	0	65	5	78	0	65	chr5_177065353
chr5	177065579	177065579	6	6.0%_50r	chr5	177065579	ZNF346	EXON	47	0	0	3	50	45	0	0	0	45	3	50	0	45	chr5_177065579
chr5	177065580	177065580	14	14.0%_50r	chr5	177065580	ZNF346	EXON	43	0	0	7	50	45	0	0	0	45	7	50	0	45	chr5_177065580
chr5	177065696	177065696	12.5	12.5%_56r	chr5	177065696	ZNF346	EXON	49	0	0	7	56	39	0	0	0	39	7	56	0	39	chr5_177065696
chr5	177065710	177065710	34.1	34.1%_44r	chr5	177065710	ZNF346	EXON	29	0	0	15	44	46	0	0	0	46	15	44	0	46	chr5_177065710
chr5	177065722	177065722	13.5	13.5%_37r	chr5	177065722	ZNF346	EXON	32	0	0	5	37	43	0	0	0	43	5	37	0	43	chr5_177065722
chr5	177065748	177065748	24.1	24.1%_29r	chr5	177065748	ZNF346	EXON	22	0	0	7	29	36	0	0	0	36	7	29	0	36	chr5_177065748
chr5	177065780	177065780	42.9	42.9%_35r	chr5	177065780	ZNF346	EXON	20	0	0	15	35	27	0	0	0	27	15	35	0	27	chr5_177065780
chr5	127530307	127530307	8	8.0%_50r	chr5	127530307	PRRC1	EXON	46	0	0	4	50	35	0	0	0	35	4	50	0	35	chr5_127530307
chr5	127533726	127533726	24	24.0%_50r	chr5	127533726	PRRC1	EXON	38	0	0	12	50	45	0	0	0	45	12	50	0	45	chr5_127533726
chr5	127539095	127539095	8.3	8.3%_24r	chr5	127539095	PRRC1	EXON	22	0	0	2	24	26	0	0	0	26	2	24	0	26	chr5_127539095
chr5	127551718	127551718	11.8	11.8%_34r	chr5	127551718	PRRC1	EXON	30	0	0	4	34	43	0	0	0	43	4	34	0	43	chr5_127551718
chr5	127551855	127551855	8.3	8.3%_36r	chr5	127551855	PRRC1	EXON	33	0	0	3	36	42	0	0	0	42	3	36	0	42	chr5_127551855
chr5	127552060	127552060	52.4	52.4%_21r	chr5	127552060	PRRC1	EXON	10	0	0	11	21	32	0	0	0	32	11	21	0	32	chr5_127552060
chr5	127552218	127552218	8	8.0%_25r	chr5	127552218	PRRC1	EXON	23	0	0	2	25	19	0	0	0	19	2	25	0	19	chr5_127552218
chr5	127553531	127553531	7.1	7.1%_28r	chr5	127553531	PRRC1	EXON	26	0	0	2	28	16	0	0	0	16	2	28	0	16	chr5_127553531
chr5	127553635	127553635	13.3	13.3%_30r	chr5	127553635	PRRC1	EXON	26	0	0	4	30	20	0	0	0	20	4	30	0	20	chr5_127553635
chr5	127553942	127553942	8	8.0%_25r	chr5	127553942	PRRC1	EXON	23	0	0	2	25	19	0	0	0	19	2	25	0	19	chr5_127553942
chr5	127554100	127554100	7.7	7.7%_26r	chr5	127554100	PRRC1	EXON	24	0	0	2	26	16	0	0	0	16	2	26	0	16	chr5_127554100
chr5	127554150	127554150	12.5	12.5%_32r	chr5	127554150	PRRC1	EXON	28	0	0	4	32	33	0	0	0	33	4	32	0	33	chr5_127554150
chr5	127554325	127554325	7.4	7.4%_27r	chr5	127554325	PRRC1	EXON	25	0	0	2	27	15	0	0	0	15	2	27	0	15	chr5_127554325
chr5	127554672	127554672	15	15.0%_40r	chr5	127554672	PRRC1	EXON	34	0	0	6	40	33	0	0	0	33	6	40	0	33	chr5_127554672
chr5	127554695	127554695	12.2	12.2%_41r	chr5	127554695	PRRC1	EXON	36	0	0	5	41	35	0	0	0	35	5	41	0	35	chr5_127554695
chr5	127554979	127554979	6.5	6.5%_31r	chr5	127554979	PRRC1	EXON	29	0	0	2	31	30	0	0	0	30	2	31	0	30	chr5_127554979
chr5	134758905	134758905	12.2	12.2%_82r	chr5	134758905	DDX46	EXON	72	0	0	10	82	63	0	0	0	63	10	82	0	63	chr5_134758905
chr5	134773848	134773848	7.7	7.7%_26r	chr5	134773848	DDX46	EXON	23	0	1	2	26	27	0	0	0	27	2	26	0	27	chr5_134773848
chr5	134784415	134784415	13.6	13.6%_22r	chr5	134784415	DDX46	EXON	19	0	0	3	22	20	0	0	0	20	3	22	0	20	chr5_134784415
chr5	134785545	134785545	6.9	6.9%_29r	chr5	134785545	DDX46	EXON	27	0	0	2	29	20	0	0	0	20	2	29	0	20	chr5_134785545
chr5	134818872	134818872	6.7	6.7%_30r	chr5	134818872	DDX46	EXON	28	0	0	2	30	32	0	0	0	32	2	30	0	32	chr5_134818872
chr5	134828728	134828728	30.8	30.8%_39r	chr5	134828728	DDX46	EXON	26	1	0	12	39	28	0	0	0	28	12	39	0	28	chr5_134828728
chr5	123023455	123023455	37.5	37.5%_80r	chr5	123023455	PPIC	EXON	0	50	30	0	80	0	53	0	0	53	30	80	0	53	chr5_123023455
chr5	123023643	123023643	49.4	49.4%_79r	chr5	123023643	PPIC	EXON	0	40	39	0	79	0	74	0	0	74	39	79	0	74	chr5_123023643
chr5	123023677	123023677	7.1	7.1%_98r	chr5	123023677	PPIC	EXON	0	91	7	0	98	0	59	0	0	59	7	98	0	59	chr5_123023677
chr5	123023759	123023759	8.2	8.2%_49r	chr5	123023759	PPIC	EXON	1	44	4	0	49	0	35	0	0	35	4	49	0	35	chr5_123023759
chr5	123023859	123023859	9.8	9.8%_193r	chr5	123023859	PPIC	EXON	0	174	19	0	193	0	155	0	0	155	19	193	0	155	chr5_123023859
chr5	123023917	123023917	39	39.0%_59r	chr5	123023917	PPIC	EXON	0	36	23	0	59	0	48	0	0	48	23	59	0	48	chr5_123023917
chr5	123023969	123023969	8.3	8.3%_121r	chr5	123023969	PPIC	EXON	0	111	10	0	121	0	113	0	0	113	10	121	0	113	chr5_123023969
chr5	123023973	123023973	40.3	40.3%_124r	chr5	123023973	PPIC	EXON	0	74	50	0	124	0	113	0	0	113	50	124	0	113	chr5_123023973
chr5	123023986	123023986	6.5	6.5%_170r	chr5	123023986	PPIC	EXON	0	159	11	0	170	0	146	0	0	146	11	170	0	146	chr5_123023986
chr5	123024001	123024001	14.2	14.2%_169r	chr5	123024001	PPIC	EXON	0	145	24	0	169	0	139	0	0	139	24	169	0	139	chr5_123024001
chr5	123025839	123025839	6	6.0%_116r	chr5	123025839	PPIC	EXON	0	109	7	0	116	1	100	0	1	102	7	116	0	102	chr5_123025839
chr5	123025894	123025894	7.4	7.4%_148r	chr5	123025894	PPIC	EXON	0	137	11	0	148	1	121	0	0	122	11	148	0	122	chr5_123025894
chr5	123036510	123036510	6.4	6.4%_78r	chr5	123036510	PPIC	EXON	0	73	5	0	78	0	62	0	0	62	5	78	0	62	chr5_123036510
chr5	123036647	123036647	7.4	7.4%_68r	chr5	123036647	PPIC	EXON	0	63	5	0	68	0	64	0	0	64	5	68	0	64	chr5_123036647
chr5	123036662	123036662	8.2	8.2%_49r	chr5	123036662	PPIC	EXON	0	45	4	0	49	0	61	0	0	61	4	49	0	61	chr5_123036662
chr5	137751753	137751753	20.3	20.3%_158r	chr5	137751753	HNRNPA0	EXON	0	126	32	0	158	0	130	0	0	130	32	158	0	130	chr5_137751753
chr5	137751772	137751772	8	8.0%_138r	chr5	137751772	HNRNPA0	EXON	0	127	11	0	138	0	107	0	0	107	11	138	0	107	chr5_137751772
chr5	137752953	137752953	13	13.0%_23r	chr5	137752953	HNRNPA0	EXON	0	20	3	0	23	0	30	0	0	30	3	23	0	30	chr5_137752953
chr5	137753111	137753111	15.4	15.4%_26r	chr5	137753111	HNRNPA0	EXON	0	22	4	0	26	0	42	0	0	42	4	26	0	42	chr5_137753111
chr5	55322351	55322351	6.7	6.7%_30r	chr5	55322351	MTREX	EXON	28	0	0	2	30	34	0	0	0	34	2	30	0	34	chr5_55322351
chr5	55328788	55328788	41.7	41.7%_48r	chr5	55328788	MTREX	EXON	28	0	0	20	48	43	0	0	0	43	20	48	0	43	chr5_55328788
chr5	55340149	55340149	21.7	21.7%_60r	chr5	55340149	MTREX	EXON	47	0	0	13	60	51	0	0	0	51	13	60	0	51	chr5_55340149
chr5	55341700	55341700	6.2	6.2%_48r	chr5	55341700	MTREX	EXON	45	0	0	3	48	58	0	0	0	58	3	48	0	58	chr5_55341700
chr5	55350921	55350921	13	13.0%_54r	chr5	55350921	MTREX	EXON	47	0	0	7	54	57	0	0	0	57	7	54	0	57	chr5_55350921
chr5	55351028	55351028	6	6.0%_50r	chr5	55351028	MTREX	EXON	47	0	0	3	50	33	0	1	0	34	3	50	0	34	chr5_55351028
chr5	55358589	55358589	12.5	12.5%_48r	chr5	55358589	MTREX	EXON	42	0	0	6	48	43	0	0	0	43	6	48	0	43	chr5_55358589
chr5	55358633	55358633	7.3	7.3%_41r	chr5	55358633	MTREX	EXON	38	0	0	3	41	60	0	0	0	60	3	41	0	60	chr5_55358633
chr5	55358696	55358696	7.1	7.1%_28r	chr5	55358696	MTREX	EXON	26	0	0	2	28	54	1	0	0	55	2	28	0	55	chr5_55358696
chr5	55366744	55366744	7.1	7.1%_42r	chr5	55366744	MTREX	EXON	39	0	0	3	42	61	0	0	0	61	3	42	0	61	chr5_55366744
chr5	55378376	55378376	60	60.0%_40r	chr5	55378376	MTREX	EXON	16	0	0	24	40	53	0	0	0	53	24	40	0	53	chr5_55378376
chr5	55378456	55378456	16.7	16.7%_42r	chr5	55378456	MTREX	EXON	35	0	0	7	42	39	0	0	0	39	7	42	0	39	chr5_55378456
chr5	55378465	55378465	14.3	14.3%_42r	chr5	55378465	MTREX	EXON	36	0	0	6	42	47	0	0	0	47	6	42	0	47	chr5_55378465
chr5	55397461	55397461	10.7	10.7%_56r	chr5	55397461	MTREX	EXON	50	0	0	6	56	57	0	0	0	57	6	56	0	57	chr5_55397461
chr5	55405536	55405536	8.3	8.3%_48r	chr5	55405536	MTREX	EXON	44	0	0	4	48	37	0	0	0	37	4	48	0	37	chr5_55405536
chr5	55410558	55410558	12	12.0%_50r	chr5	55410558	MTREX	EXON	44	0	0	6	50	47	0	0	0	47	6	50	0	47	chr5_55410558
chr5	55416048	55416048	6.8	6.8%_59r	chr5	55416048	MTREX	EXON	55	0	0	4	59	75	0	0	0	75	4	59	0	75	chr5_55416048
chr5	55416112	55416112	7.4	7.4%_68r	chr5	55416112	MTREX	EXON	63	0	0	5	68	65	0	0	0	65	5	68	0	65	chr5_55416112
chr5	55422941	55422941	9.1	9.1%_33r	chr5	55422941	MTREX	EXON	30	0	0	3	33	28	0	0	0	28	3	33	0	28	chr5_55422941
chr5	55422942	55422942	18.2	18.2%_33r	chr5	55422942	MTREX	EXON	27	0	0	6	33	28	0	0	0	28	6	33	0	28	chr5_55422942
chr5	154815119	154815119	18.2	18.2%_22r	chr5	154815119	LARP1	EXON	18	0	0	4	22	13	0	0	0	13	4	22	0	13	chr5_154815119
chr5	154816665	154816665	6.2	6.2%_32r	chr5	154816665	LARP1	EXON	30	0	0	2	32	25	0	0	0	25	2	32	0	25	chr5_154816665
chr5	154816724	154816724	6.2	6.2%_32r	chr5	154816724	LARP1	EXON	30	0	0	2	32	21	0	0	0	21	2	32	0	21	chr5_154816724
chr5	154816735	154816735	6.9	6.9%_29r	chr5	154816735	LARP1	EXON	27	0	0	2	29	21	0	0	0	21	2	29	0	21	chr5_154816735
chr5	154816781	154816781	10.7	10.7%_28r	chr5	154816781	LARP1	EXON	25	0	0	3	28	25	0	0	0	25	3	28	0	25	chr5_154816781
chr5	154816953	154816953	6.5	6.5%_31r	chr5	154816953	LARP1	EXON	29	0	0	2	31	30	0	0	0	30	2	31	0	30	chr5_154816953
chr5	154816957	154816957	40.6	40.6%_32r	chr5	154816957	LARP1	EXON	19	0	0	13	32	29	0	0	0	29	13	32	0	29	chr5_154816957
chr5	154817090	154817090	8.9	8.9%_56r	chr5	154817090	LARP1	EXON	51	0	0	5	56	52	0	0	0	52	5	56	0	52	chr5_154817090
chr5	154817105	154817105	8.7	8.7%_46r	chr5	154817105	LARP1	EXON	42	0	0	4	46	47	0	0	0	47	4	46	0	47	chr5_154817105
chr5	154817290	154817290	15.6	15.6%_45r	chr5	154817290	LARP1	EXON	38	0	0	7	45	33	0	0	0	33	7	45	0	33	chr5_154817290
chr5	176526900	176526900	9.4	9.4%_32r	chr5	176526900	RNF44	EXON	0	29	3	0	32	0	15	0	0	15	3	32	0	15	chr5_176526900
chr5	129105292	129105292	8.9	8.9%_112r	chr5	129105292	ISOC1	EXON	102	0	0	10	112	81	0	0	0	81	10	112	0	81	chr5_129105292
chr5	129113052	129113052	10.9	10.9%_174r	chr5	129113052	ISOC1	EXON	155	0	0	19	174	144	0	1	0	145	19	174	0	145	chr5_129113052
chr5	129113154	129113154	14	14.0%_100r	chr5	129113154	ISOC1	EXON	86	0	0	14	100	82	0	0	0	82	14	100	0	82	chr5_129113154
chr5	43289452	43289452	6.9	6.9%_144r	chr5	43289452	HMGCS1	EXON	0	134	10	0	144	0	141	0	0	141	10	144	0	141	chr5_43289452
chr5	43289508	43289508	15	15.0%_107r	chr5	43289508	HMGCS1	EXON	0	91	16	0	107	1	78	0	0	79	16	107	0	79	chr5_43289508
chr5	43289982	43289982	6.1	6.1%_49r	chr5	43289982	HMGCS1	EXON	0	46	3	0	49	0	36	0	0	36	3	49	0	36	chr5_43289982
chr5	43289986	43289986	10.9	10.9%_46r	chr5	43289986	HMGCS1	EXON	0	41	5	0	46	0	40	0	0	40	5	46	0	40	chr5_43289986
chr5	43290011	43290011	16.9	16.9%_65r	chr5	43290011	HMGCS1	EXON	0	54	11	0	65	0	54	0	0	54	11	65	0	54	chr5_43290011
chr5	43298078	43298078	14.7	14.7%_34r	chr5	43298078	HMGCS1	EXON	0	29	5	0	34	0	39	0	0	39	5	34	0	39	chr5_43298078
chr5	43298777	43298777	8.9	8.9%_45r	chr5	43298777	HMGCS1	EXON	0	41	4	0	45	1	53	0	0	54	4	45	0	54	chr5_43298777
chr5	43298782	43298782	6.7	6.7%_45r	chr5	43298782	HMGCS1	EXON	0	42	3	0	45	0	55	0	0	55	3	45	0	55	chr5_43298782
chr5	83053164	83053164	8.8	8.8%_34r	chr5	83053164	TMEM167A	EXON	0	31	3	0	34	0	29	0	0	29	3	34	0	29	chr5_83053164
chr5	83053323	83053323	20	20.0%_25r	chr5	83053323	TMEM167A	EXON	0	20	5	0	25	0	25	0	0	25	5	25	0	25	chr5_83053323
chr5	83053342	83053342	14.7	14.7%_34r	chr5	83053342	TMEM167A	EXON	0	29	5	0	34	0	26	0	0	26	5	34	0	26	chr5_83053342
chr5	83053453	83053453	8.8	8.8%_34r	chr5	83053453	TMEM167A	EXON	0	31	3	0	34	0	35	0	0	35	3	34	0	35	chr5_83053453
chr5	83053478	83053478	15.8	15.8%_38r	chr5	83053478	TMEM167A	EXON	0	32	6	0	38	0	34	0	0	34	6	38	0	34	chr5_83053478
chr5	83053660	83053660	12.9	12.9%_31r	chr5	83053660	TMEM167A	EXON	0	27	4	0	31	0	32	0	0	32	4	31	0	32	chr5_83053660
chr5	83053776	83053776	7.7	7.7%_26r	chr5	83053776	TMEM167A	EXON	0	24	2	0	26	0	21	0	0	21	2	26	0	21	chr5_83053776
chr5	83053820	83053820	6.1	6.1%_33r	chr5	83053820	TMEM167A	EXON	0	31	2	0	33	0	28	0	0	28	2	33	0	28	chr5_83053820
chr5	83053828	83053828	6.2	6.2%_32r	chr5	83053828	TMEM167A	EXON	0	30	2	0	32	0	28	0	0	28	2	32	0	28	chr5_83053828
chr5	83053886	83053886	12.5	12.5%_32r	chr5	83053886	TMEM167A	EXON	0	28	4	0	32	0	27	0	0	27	4	32	0	27	chr5_83053886
chr5	83053901	83053901	6.5	6.5%_46r	chr5	83053901	TMEM167A	EXON	0	43	3	0	46	0	30	0	0	30	3	46	0	30	chr5_83053901
chr5	83054019	83054019	22.2	22.2%_27r	chr5	83054019	TMEM167A	EXON	0	21	6	0	27	0	23	0	0	23	6	27	0	23	chr5_83054019
chr5	83054020	83054020	7.7	7.7%_26r	chr5	83054020	TMEM167A	EXON	0	24	2	0	26	0	23	0	0	23	2	26	0	23	chr5_83054020
chr5	83054021	83054021	7.7	7.7%_26r	chr5	83054021	TMEM167A	EXON	0	24	2	0	26	0	22	0	0	22	2	26	0	22	chr5_83054021
chr5	83054118	83054118	10	10.0%_40r	chr5	83054118	TMEM167A	EXON	0	36	4	0	40	0	25	0	0	25	4	40	0	25	chr5_83054118
chr5	83054225	83054225	6.2	6.2%_32r	chr5	83054225	TMEM167A	EXON	0	30	2	0	32	0	22	0	0	22	2	32	0	22	chr5_83054225
chr5	83054274	83054274	7.7	7.7%_26r	chr5	83054274	TMEM167A	EXON	0	24	2	0	26	0	12	0	0	12	2	26	0	12	chr5_83054274
chr5	83054310	83054310	9.1	9.1%_22r	chr5	83054310	TMEM167A	EXON	0	20	2	0	22	0	16	0	0	16	2	22	0	16	chr5_83054310
chr5	83054469	83054469	9.5	9.5%_21r	chr5	83054469	TMEM167A	EXON	0	19	2	0	21	0	15	0	0	15	2	21	0	15	chr5_83054469
chr5	83054626	83054626	8.7	8.7%_23r	chr5	83054626	TMEM167A	EXON	0	21	2	0	23	0	22	0	0	22	2	23	0	22	chr5_83054626
chr5	83054768	83054768	6.1	6.1%_33r	chr5	83054768	TMEM167A	EXON	0	31	2	0	33	0	16	0	0	16	2	33	0	16	chr5_83054768
chr5	83054964	83054964	15.4	15.4%_26r	chr5	83054964	TMEM167A	EXON	0	22	4	0	26	0	14	0	0	14	4	26	0	14	chr5_83054964
chr5	83055157	83055157	17.4	17.4%_23r	chr5	83055157	TMEM167A	EXON	0	19	4	0	23	0	10	0	0	10	4	23	0	10	chr5_83055157
chr5	83055205	83055205	7.1	7.1%_28r	chr5	83055205	TMEM167A	EXON	0	26	2	0	28	0	12	0	0	12	2	28	0	12	chr5_83055205
chr5	83055206	83055206	6.9	6.9%_29r	chr5	83055206	TMEM167A	EXON	0	27	2	0	29	0	12	0	0	12	2	29	0	12	chr5_83055206
chr5	83055213	83055213	10.7	10.7%_28r	chr5	83055213	TMEM167A	EXON	0	25	3	0	28	0	10	0	0	10	3	28	0	10	chr5_83055213
chr5	83055448	83055448	10.7	10.7%_28r	chr5	83055448	TMEM167A	EXON	0	25	3	0	28	0	21	0	0	21	3	28	0	21	chr5_83055448
chr5	83055695	83055695	17.4	17.4%_23r	chr5	83055695	TMEM167A	EXON	0	19	4	0	23	0	12	0	0	12	4	23	0	12	chr5_83055695
chr5	83055714	83055714	6.7	6.7%_30r	chr5	83055714	TMEM167A	EXON	0	28	2	0	30	0	15	0	0	15	2	30	0	15	chr5_83055714
chr5	83055745	83055745	33.3	33.3%_24r	chr5	83055745	TMEM167A	EXON	0	16	8	0	24	0	17	0	0	17	8	24	0	17	chr5_83055745
chr5	83055775	83055775	10	10.0%_20r	chr5	83055775	TMEM167A	EXON	0	18	2	0	20	0	17	0	0	17	2	20	0	17	chr5_83055775
chr5	83055909	83055909	11.1	11.1%_27r	chr5	83055909	TMEM167A	EXON	0	24	3	0	27	0	18	0	0	18	3	27	0	18	chr5_83055909
chr5	83056486	83056486	12.5	12.5%_128r	chr5	83056486	TMEM167A	EXON	0	112	16	0	128	0	79	0	0	79	16	128	0	79	chr5_83056486
chr5	83056515	83056515	13.4	13.4%_127r	chr5	83056515	TMEM167A	EXON	0	110	17	0	127	0	77	0	0	77	17	127	0	77	chr5_83056515
chr5	83056565	83056565	44	44.0%_125r	chr5	83056565	TMEM167A	EXON	0	70	55	0	125	0	90	0	0	90	55	125	0	90	chr5_83056565
chr5	83056592	83056592	27.9	27.9%_147r	chr5	83056592	TMEM167A	EXON	0	106	41	0	147	0	122	0	0	122	41	147	0	122	chr5_83056592
chr5	83056793	83056793	7	7.0%_258r	chr5	83056793	TMEM167A	EXON	0	240	18	0	258	0	160	0	0	160	18	258	0	160	chr5_83056793
chr5	83056969	83056969	6.1	6.1%_82r	chr5	83056969	TMEM167A	EXON	0	77	5	0	82	0	76	0	0	76	5	82	0	76	chr5_83056969
chr5	83057035	83057035	9.4	9.4%_212r	chr5	83057035	TMEM167A	EXON	0	191	20	1	212	0	144	0	0	144	20	212	0	144	chr5_83057035
chr5	83057117	83057117	17.5	17.5%_365r	chr5	83057117	TMEM167A	EXON	1	300	64	0	365	0	298	0	0	298	64	365	0	298	chr5_83057117
chr5	442307	442307	8.3	8.3%_24r	chr5	442307	EXOC3-AS1	EXON	0	22	2	0	24	0	14	0	0	14	2	24	0	14	chr5_442307
chr5	442463	442463	15	15.0%_20r	chr5	442463	EXOC3-AS1	EXON	0	17	3	0	20	0	13	0	0	13	3	20	0	13	chr5_442463
chr5	143400310	143400310	13	13.0%_23r	chr5	143400310	NR3C1	EXON	0	20	3	0	23	0	34	0	0	34	3	23	0	34	chr5_143400310
chr5	150527838	150527838	20.7	20.7%_29r	chr5	150527838	NDST1	EXON	23	0	0	6	29	32	0	0	0	32	6	29	0	32	chr5_150527838
chr5	150535802	150535802	6.7	6.7%_45r	chr5	150535802	NDST1	EXON	41	0	1	3	45	33	0	0	0	33	3	45	0	33	chr5_150535802
chr5	150549713	150549713	8.3	8.3%_24r	chr5	150549713	NDST1	EXON	22	0	0	2	24	24	0	0	0	24	2	24	0	24	chr5_150549713
chr5	150553834	150553834	7.1	7.1%_28r	chr5	150553834	NDST1	EXON	26	0	0	2	28	33	0	0	0	33	2	28	0	33	chr5_150553834
chr5	154053336	154053336	8.3	8.3%_48r	chr5	154053336	MFAP3	EXON	44	0	0	4	48	32	0	0	0	32	4	48	0	32	chr5_154053336
chr5	154054767	154054767	14.3	14.3%_42r	chr5	154054767	MFAP3	EXON	36	0	0	6	42	22	0	0	0	22	6	42	0	22	chr5_154054767
chr5	154054769	154054769	7	7.0%_43r	chr5	154054769	MFAP3	EXON	40	0	0	3	43	21	0	0	0	21	3	43	0	21	chr5_154054769
chr5	154054900	154054900	16.7	16.7%_24r	chr5	154054900	MFAP3	EXON	20	0	0	4	24	14	0	0	0	14	4	24	0	14	chr5_154054900
chr5	154054901	154054901	28	28.0%_25r	chr5	154054901	MFAP3	EXON	18	0	0	7	25	16	0	0	0	16	7	25	0	16	chr5_154054901
chr5	154054914	154054914	11.1	11.1%_27r	chr5	154054914	MFAP3	EXON	24	0	0	3	27	17	0	0	0	17	3	27	0	17	chr5_154054914
chr5	154057231	154057231	9.5	9.5%_21r	chr5	154057231	MFAP3	EXON	19	0	0	2	21	15	0	0	0	15	2	21	0	15	chr5_154057231
chr5	149995931	149995931	25.9	25.9%_27r	chr5	149995931	TIGD6	EXON	0	20	7	0	27	0	14	0	0	14	7	27	0	14	chr5_149995931
chr5	177483569	177483569	7.8	7.8%_51r	chr5	177483569	PDLIM7	EXON	0	47	4	0	51	0	46	0	0	46	4	51	0	46	chr5_177483569
chr5	177483690	177483690	16.3	16.3%_92r	chr5	177483690	PDLIM7	EXON	0	76	15	1	92	0	89	0	0	89	15	92	0	89	chr5_177483690
chr5	177483884	177483884	15.1	15.1%_86r	chr5	177483884	PDLIM7	EXON	0	73	13	0	86	0	68	0	0	68	13	86	0	68	chr5_177483884
chr5	177489561	177489561	10	10.0%_30r	chr5	177489561	PDLIM7	EXON	0	27	3	0	30	0	43	0	0	43	3	30	0	43	chr5_177489561
chr5	65762976	65762976	44.9	44.9%_49r	chr5	65762976	NLN	EXON	27	0	0	22	49	44	0	0	0	44	22	49	0	44	chr5_65762976
chr5	65777478	65777478	8	8.0%_25r	chr5	65777478	NLN	EXON	23	0	0	2	25	16	0	0	0	16	2	25	0	16	chr5_65777478
chr5	65809628	65809628	33.3	33.3%_21r	chr5	65809628	NLN	EXON	14	0	0	7	21	22	0	0	0	22	7	21	0	22	chr5_65809628
chr5	65823061	65823061	35	35.0%_20r	chr5	65823061	NLN	EXON	13	0	0	7	20	14	0	0	0	14	7	20	0	14	chr5_65823061
chr5	72358470	72358470	13.6	13.6%_22r	chr5	72358470	PTCD2	EXON	19	0	0	3	22	16	0	0	0	16	3	22	0	16	chr5_72358470
chr5	72358570	72358570	9.4	9.4%_32r	chr5	72358570	PTCD2	EXON	29	0	0	3	32	23	0	0	0	23	3	32	0	23	chr5_72358570
chr5	14610844	14610844	14.3	14.3%_21r	chr5	14610844	OTULINL	EXON	18	0	0	3	21	23	0	0	0	23	3	21	0	23	chr5_14610844
chr5	66079579	66079579	28.6	28.6%_28r	chr5	66079579	ERBIN	EXON	20	0	0	8	28	24	0	0	0	24	8	28	0	24	chr5_66079579
chr5	66079613	66079613	6.5	6.5%_31r	chr5	66079613	ERBIN	EXON	29	0	0	2	31	13	0	0	0	13	2	31	0	13	chr5_66079613
chr5	66079614	66079614	29	29.0%_31r	chr5	66079614	ERBIN	EXON	22	0	0	9	31	13	0	0	0	13	9	31	0	13	chr5_66079614
chr5	66080013	66080013	24	24.0%_25r	chr5	66080013	ERBIN	EXON	19	0	0	6	25	24	0	0	0	24	6	25	0	24	chr5_66080013
chr5	66080343	66080343	13.6	13.6%_22r	chr5	66080343	ERBIN	EXON	19	0	0	3	22	11	0	0	0	11	3	22	0	11	chr5_66080343
chr5	98793840	98793840	8	8.0%_25r	chr5	98793840	RGMB	EXON	23	0	0	2	25	15	0	0	0	15	2	25	0	15	chr5_98793840
chr5	98794095	98794095	17.1	17.1%_35r	chr5	98794095	RGMB	EXON	29	0	0	6	35	20	0	0	0	20	6	35	0	20	chr5_98794095
chr5	64800316	64800316	7.6	7.6%_66r	chr5	64800316	CWC27	EXON	61	0	0	5	66	31	0	0	0	31	5	66	0	31	chr5_64800316
chr5	65018366	65018366	15	15.0%_20r	chr5	65018366	CWC27	EXON	17	0	0	3	20	15	0	0	0	15	3	20	0	15	chr5_65018366
chr5	148402394	148402394	6.1	6.1%_33r	chr5	148402394	FBXO38	EXON	31	0	0	2	33	44	0	0	0	44	2	33	0	44	chr5_148402394
chr5	148424075	148424075	27.3	27.3%_22r	chr5	148424075	FBXO38	EXON	16	0	0	6	22	25	0	0	0	25	6	22	0	25	chr5_148424075
chr5	95814049	95814049	10.3	10.3%_39r	chr5	95814049	GLRX	EXON	0	35	4	0	39	0	34	0	0	34	4	39	0	34	chr5_95814049
chr5	95814105	95814105	25	25.0%_40r	chr5	95814105	GLRX	EXON	0	30	10	0	40	1	33	0	0	34	10	40	0	34	chr5_95814105
chr5	95814136	95814136	15.7	15.7%_70r	chr5	95814136	GLRX	EXON	0	59	11	0	70	0	64	0	0	64	11	70	0	64	chr5_95814136
chr5	180847924	180847924	14.3	14.3%_49r	chr5	180847924	ZFP62	EXON	0	42	7	0	49	0	36	0	0	36	7	49	0	36	chr5_180847924
chr5	180849371	180849371	15	15.0%_20r	chr5	180849371	ZFP62	EXON	0	17	3	0	20	1	9	0	0	10	3	20	0	10	chr5_180849371
chr5	180849391	180849391	6.5	6.5%_31r	chr5	180849391	ZFP62	EXON	0	29	2	0	31	0	23	0	0	23	2	31	0	23	chr5_180849391
chr5	180850690	180850690	6.5	6.5%_31r	chr5	180850690	ZFP62	EXON	0	29	2	0	31	0	17	0	0	17	2	31	0	17	chr5_180850690
chr5	180850743	180850743	6.7	6.7%_30r	chr5	180850743	ZFP62	EXON	0	28	2	0	30	0	18	0	0	18	2	30	0	18	chr5_180850743
chr5	160065176	160065176	6.6	6.6%_182r	chr5	160065176	TTC1	EXON	170	0	0	12	182	137	0	0	0	137	12	182	0	137	chr5_160065176
chr5	160065177	160065177	7.1	7.1%_184r	chr5	160065177	TTC1	EXON	171	0	0	13	184	138	0	0	0	138	13	184	0	138	chr5_160065177
chr5	69114452	69114452	6.4	6.4%_47r	chr5	69114452	SLC30A5	EXON	44	0	0	3	47	38	0	0	0	38	3	47	0	38	chr5_69114452
chr5	69116570	69116570	22.7	22.7%_22r	chr5	69116570	SLC30A5	EXON	17	0	0	5	22	33	0	0	0	33	5	22	0	33	chr5_69116570
chr5	69117309	69117309	6.7	6.7%_30r	chr5	69117309	SLC30A5	EXON	28	0	0	2	30	34	0	0	0	34	2	30	0	34	chr5_69117309
chr5	69118626	69118626	7.9	7.9%_38r	chr5	69118626	SLC30A5	EXON	35	0	0	3	38	35	0	0	0	35	3	38	0	35	chr5_69118626
chr5	69121745	69121745	14	14.0%_43r	chr5	69121745	SLC30A5	EXON	37	0	0	6	43	38	0	0	0	38	6	43	0	38	chr5_69121745
chr5	69121755	69121755	8.3	8.3%_36r	chr5	69121755	SLC30A5	EXON	33	0	0	3	36	48	0	0	0	48	3	36	0	48	chr5_69121755
chr5	69121757	69121757	66.7	66.7%_36r	chr5	69121757	SLC30A5	EXON	12	0	0	24	36	47	0	0	0	47	24	36	0	47	chr5_69121757
chr5	69121839	69121839	15.6	15.6%_32r	chr5	69121839	SLC30A5	EXON	27	0	0	5	32	46	0	0	0	46	5	32	0	46	chr5_69121839
chr5	69121886	69121886	12.2	12.2%_41r	chr5	69121886	SLC30A5	EXON	36	0	0	5	41	28	0	0	0	28	5	41	0	28	chr5_69121886
chr5	69121887	69121887	7.3	7.3%_41r	chr5	69121887	SLC30A5	EXON	38	0	0	3	41	28	0	0	0	28	3	41	0	28	chr5_69121887
chr5	69123209	69123209	17.1	17.1%_35r	chr5	69123209	SLC30A5	EXON	29	0	0	6	35	39	0	0	0	39	6	35	0	39	chr5_69123209
chr5	69123278	69123278	22.5	22.5%_40r	chr5	69123278	SLC30A5	EXON	31	0	0	9	40	43	0	0	0	43	9	40	0	43	chr5_69123278
chr5	69129567	69129567	9.1	9.1%_33r	chr5	69129567	SLC30A5	EXON	30	0	0	3	33	24	0	0	0	24	3	33	0	24	chr5_69129567
chr5	75345616	75345616	7.1	7.1%_42r	chr5	75345616	HMGCR	EXON	38	0	1	3	42	33	0	0	0	33	3	42	0	33	chr5_75345616
chr5	75350051	75350051	14.7	14.7%_34r	chr5	75350051	HMGCR	EXON	29	0	0	5	34	27	0	0	0	27	5	34	0	27	chr5_75350051
chr5	75350095	75350095	13	13.0%_23r	chr5	75350095	HMGCR	EXON	20	0	0	3	23	35	0	0	0	35	3	23	0	35	chr5_75350095
chr5	75350099	75350099	6.9	6.9%_29r	chr5	75350099	HMGCR	EXON	27	0	0	2	29	42	0	0	0	42	2	29	0	42	chr5_75350099
chr5	75355130	75355130	6.5	6.5%_31r	chr5	75355130	HMGCR	EXON	29	0	0	2	31	28	0	0	0	28	2	31	0	28	chr5_75355130
chr5	75355444	75355444	8.2	8.2%_49r	chr5	75355444	HMGCR	EXON	45	0	0	4	49	49	0	0	0	49	4	49	0	49	chr5_75355444
chr5	75359250	75359250	7.3	7.3%_41r	chr5	75359250	HMGCR	EXON	38	0	0	3	41	28	0	0	0	28	3	41	0	28	chr5_75359250
chr5	75359532	75359532	10.4	10.4%_48r	chr5	75359532	HMGCR	EXON	43	0	0	5	48	57	0	0	0	57	5	48	0	57	chr5_75359532
chr5	75360448	75360448	27.7	27.7%_47r	chr5	75360448	HMGCR	EXON	34	0	0	13	47	48	0	0	0	48	13	47	0	48	chr5_75360448
chr5	75360533	75360533	10.4	10.4%_48r	chr5	75360533	HMGCR	EXON	43	0	0	5	48	52	0	0	0	52	5	48	0	52	chr5_75360533
chr5	75360643	75360643	11.9	11.9%_42r	chr5	75360643	HMGCR	EXON	37	0	0	5	42	29	0	0	0	29	5	42	0	29	chr5_75360643
chr5	75360653	75360653	9.7	9.7%_31r	chr5	75360653	HMGCR	EXON	28	0	0	3	31	25	0	0	0	25	3	31	0	25	chr5_75360653
chr5	75361114	75361114	38.9	38.9%_36r	chr5	75361114	HMGCR	EXON	22	0	0	14	36	22	1	0	0	23	14	36	0	23	chr5_75361114
chr5	75361796	75361796	18.2	18.2%_22r	chr5	75361796	HMGCR	EXON	17	0	1	4	22	20	0	0	0	20	4	22	0	20	chr5_75361796
chr5	115580796	115580796	9.1	9.1%_22r	chr5	115580796	TMED7-TICAM2	EXON	0	20	2	0	22	0	11	0	0	11	2	22	0	11	chr5_115580796
chr5	115625824	115625824	8	8.0%_25r	chr5	115625824	TMED7-TICAM2	EXON	0	23	2	0	25	0	27	0	0	27	2	25	0	27	chr5_115625824
chr5	178612507	178612507	8.9	8.9%_45r	chr5	178612507	CLK4	EXON	0	41	4	0	45	0	49	0	0	49	4	45	0	49	chr5_178612507
chr5	178612817	178612817	6.1	6.1%_33r	chr5	178612817	CLK4	EXON	0	31	2	0	33	0	46	0	0	46	2	33	0	46	chr5_178612817
chr5	178613734	178613734	8.6	8.6%_70r	chr5	178613734	CLK4	EXON	0	64	6	0	70	0	75	0	0	75	6	70	0	75	chr5_178613734
chr5	178613736	178613736	24.3	24.3%_70r	chr5	178613736	CLK4	EXON	0	53	17	0	70	0	79	0	0	79	17	70	0	79	chr5_178613736
chr5	157786467	157786467	25.5	25.5%_141r	chr5	157786467	CLINT1	EXON	0	105	36	0	141	0	81	0	0	81	36	141	0	81	chr5_157786467
chr5	157786506	157786506	6.7	6.7%_90r	chr5	157786506	CLINT1	EXON	0	84	6	0	90	0	51	0	0	51	6	90	0	51	chr5_157786506
chr5	157786507	157786507	6.7	6.7%_90r	chr5	157786507	CLINT1	EXON	0	84	6	0	90	0	51	0	0	51	6	90	0	51	chr5_157786507
chr5	157787465	157787465	7.9	7.9%_89r	chr5	157787465	CLINT1	EXON	0	82	7	0	89	0	68	0	0	68	7	89	0	68	chr5_157787465
chr5	157787632	157787632	18.7	18.7%_75r	chr5	157787632	CLINT1	EXON	0	61	14	0	75	0	70	0	0	70	14	75	0	70	chr5_157787632
chr5	157787745	157787745	8.9	8.9%_101r	chr5	157787745	CLINT1	EXON	1	90	9	1	101	0	92	0	1	93	9	101	0	93	chr5_157787745
chr5	157787775	157787775	7.1	7.1%_141r	chr5	157787775	CLINT1	EXON	0	131	10	0	141	0	135	0	0	135	10	141	0	135	chr5_157787775
chr5	157787837	157787837	26	26.0%_104r	chr5	157787837	CLINT1	EXON	0	77	27	0	104	0	89	0	0	89	27	104	0	89	chr5_157787837
chr5	157791770	157791770	10.3	10.3%_126r	chr5	157791770	CLINT1	EXON	0	113	13	0	126	0	111	0	0	111	13	126	0	111	chr5_157791770
chr5	157806024	157806024	14.2	14.2%_169r	chr5	157806024	CLINT1	EXON	0	145	24	0	169	0	157	0	0	157	24	169	0	157	chr5_157806024
chr5	157809639	157809639	22.7	22.7%_75r	chr5	157809639	CLINT1	EXON	0	58	17	0	75	0	82	0	0	82	17	75	0	82	chr5_157809639
chr5	157813215	157813215	13	13.0%_154r	chr5	157813215	CLINT1	EXON	0	134	20	0	154	0	149	0	0	149	20	154	0	149	chr5_157813215
chr5	157817443	157817443	17	17.0%_53r	chr5	157817443	CLINT1	EXON	0	44	9	0	53	0	55	0	0	55	9	53	0	55	chr5_157817443
chr5	157859048	157859048	13.6	13.6%_22r	chr5	157859048	CLINT1	EXON	1	18	3	0	22	0	21	0	0	21	3	22	0	21	chr5_157859048
chr5	173164074	173164074	51	51.0%_49r	chr5	173164074	BNIP1	EXON	24	0	0	25	49	52	0	0	0	52	25	49	0	52	chr5_173164074
chr5	181241860	181241860	9.1	9.1%_22r	chr5	181241860	SNORD96A	EXON	0	20	2	0	22	0	12	0	0	12	2	22	0	12	chr5_181241860
chr5	65670155	65670155	8	8.0%_25r	chr5	65670155	SGTB	EXON	0	23	2	0	25	0	25	0	0	25	2	25	0	25	chr5_65670155
chr5	65670327	65670327	10.3	10.3%_29r	chr5	65670327	SGTB	EXON	0	26	3	0	29	0	23	0	0	23	3	29	0	23	chr5_65670327
chr5	65680526	65680526	7.7	7.7%_26r	chr5	65680526	SGTB	EXON	0	24	2	0	26	0	33	0	0	33	2	26	0	33	chr5_65680526
chr5	65704300	65704300	6	6.0%_50r	chr5	65704300	SGTB	EXON	0	47	3	0	50	0	37	0	0	37	3	50	0	37	chr5_65704300
chr5	126544964	126544964	7.5	7.5%_80r	chr5	126544964	ALDH7A1	EXON	0	74	6	0	80	0	62	0	0	62	6	80	0	62	chr5_126544964
chr5	126546334	126546334	13.5	13.5%_104r	chr5	126546334	ALDH7A1	EXON	0	90	14	0	104	0	78	0	0	78	14	104	0	78	chr5_126546334
chr5	126546390	126546390	12.1	12.1%_58r	chr5	126546390	ALDH7A1	EXON	0	51	7	0	58	0	39	0	0	39	7	58	0	39	chr5_126546390
chr5	126552037	126552037	12	12.0%_125r	chr5	126552037	ALDH7A1	EXON	0	110	15	0	125	0	86	0	1	87	15	125	0	87	chr5_126552037
chr5	126559257	126559257	10.9	10.9%_129r	chr5	126559257	ALDH7A1	EXON	0	115	14	0	129	0	100	0	0	100	14	129	0	100	chr5_126559257
chr5	126568288	126568288	9.7	9.7%_72r	chr5	126568288	ALDH7A1	EXON	0	64	7	1	72	0	64	0	0	64	7	72	0	64	chr5_126568288
chr5	126568290	126568290	57.1	57.1%_70r	chr5	126568290	ALDH7A1	EXON	0	30	40	0	70	0	68	0	0	68	40	70	0	68	chr5_126568290
chr5	126568291	126568291	11.1	11.1%_72r	chr5	126568291	ALDH7A1	EXON	0	64	8	0	72	0	71	0	0	71	8	72	0	71	chr5_126568291
chr5	126570830	126570830	12.3	12.3%_65r	chr5	126570830	ALDH7A1	EXON	0	57	8	0	65	0	69	0	0	69	8	65	0	69	chr5_126570830
chr5	126570833	126570833	8.8	8.8%_68r	chr5	126570833	ALDH7A1	EXON	0	62	6	0	68	0	71	0	0	71	6	68	0	71	chr5_126570833
chr5	126570856	126570856	7.5	7.5%_80r	chr5	126570856	ALDH7A1	EXON	0	74	6	0	80	0	78	0	0	78	6	80	0	78	chr5_126570856
chr5	126577091	126577091	12.8	12.8%_94r	chr5	126577091	ALDH7A1	EXON	0	82	12	0	94	1	68	0	0	69	12	94	0	69	chr5_126577091
chr5	126582930	126582930	6.8	6.8%_44r	chr5	126582930	ALDH7A1	EXON	0	41	3	0	44	0	34	0	0	34	3	44	0	34	chr5_126582930
chr5	126582954	126582954	6.1	6.1%_49r	chr5	126582954	ALDH7A1	EXON	0	46	3	0	49	0	38	0	0	38	3	49	0	38	chr5_126582954
chr5	126592694	126592694	24.6	24.6%_65r	chr5	126592694	ALDH7A1	EXON	0	49	16	0	65	0	48	0	0	48	16	65	0	48	chr5_126592694
chr5	126595158	126595158	13.6	13.6%_59r	chr5	126595158	ALDH7A1	EXON	0	51	8	0	59	0	48	0	0	48	8	59	0	48	chr5_126595158
chr5	180300958	180300958	11.1	11.1%_27r	chr5	180300958	GFPT2	EXON	0	24	3	0	27	0	22	0	0	22	3	27	0	22	chr5_180300958
chr5	180301245	180301245	13	13.0%_23r	chr5	180301245	GFPT2	EXON	0	20	3	0	23	0	25	0	0	25	3	23	0	25	chr5_180301245
chr5	115625824	115625824	8	8.0%_25r	chr5	115625824	TMED7	EXON	0	23	2	0	25	0	27	0	0	27	2	25	0	27	chr5_115625824
chr5	138506279	138506279	11.1	11.1%_54r	chr5	138506279	ETF1	EXON	0	48	6	0	54	0	33	0	0	33	6	54	0	33	chr5_138506279
chr5	138507462	138507462	15	15.0%_20r	chr5	138507462	ETF1	EXON	0	17	3	0	20	0	13	0	0	13	3	20	0	13	chr5_138507462
chr5	138508805	138508805	8.7	8.7%_183r	chr5	138508805	ETF1	EXON	0	167	16	0	183	0	145	0	0	145	16	183	0	145	chr5_138508805
chr5	138511486	138511486	6.2	6.2%_161r	chr5	138511486	ETF1	EXON	0	151	10	0	161	0	126	0	0	126	10	161	0	126	chr5_138511486
chr5	138511581	138511581	15.9	15.9%_201r	chr5	138511581	ETF1	EXON	0	169	32	0	201	0	157	0	0	157	32	201	0	157	chr5_138511581
chr5	138512799	138512799	6.8	6.8%_176r	chr5	138512799	ETF1	EXON	0	164	12	0	176	0	132	0	0	132	12	176	0	132	chr5_138512799
chr5	138512952	138512952	15.1	15.1%_146r	chr5	138512952	ETF1	EXON	0	124	22	0	146	0	134	0	1	135	22	146	0	135	chr5_138512952
chr5	138518798	138518798	8.4	8.4%_119r	chr5	138518798	ETF1	EXON	0	109	10	0	119	0	80	0	0	80	10	119	0	80	chr5_138518798
chr5	138543126	138543126	6.1	6.1%_33r	chr5	138543126	ETF1	EXON	0	31	2	0	33	0	25	0	1	26	2	33	0	26	chr5_138543126
chr5	36608550	36608550	9.5	9.5%_21r	chr5	36608550	SLC1A3	EXON	19	0	0	2	21	23	0	0	0	23	2	21	0	23	chr5_36608550
chr5	36671046	36671046	20	20.0%_20r	chr5	36671046	SLC1A3	EXON	16	0	0	4	20	34	0	0	0	34	4	20	0	34	chr5_36671046
chr5	36671050	36671050	25	25.0%_20r	chr5	36671050	SLC1A3	EXON	15	0	0	5	20	32	0	0	0	32	5	20	0	32	chr5_36671050
chr5	36686816	36686816	28.6	28.6%_21r	chr5	36686816	SLC1A3	EXON	15	0	0	6	21	24	0	0	0	24	6	21	0	24	chr5_36686816
chr5	36687527	36687527	33.3	33.3%_21r	chr5	36687527	SLC1A3	EXON	14	0	0	7	21	20	0	0	0	20	7	21	0	20	chr5_36687527
chr5	36687726	36687726	9.1	9.1%_22r	chr5	36687726	SLC1A3	EXON	20	0	0	2	22	29	0	0	0	29	2	22	0	29	chr5_36687726
chr5	36687745	36687745	6.7	6.7%_30r	chr5	36687745	SLC1A3	EXON	28	0	0	2	30	33	0	0	0	33	2	30	0	33	chr5_36687745
chr5	173317400	173317400	8.3	8.3%_24r	chr5	173317400	STC2	EXON	0	22	2	0	24	0	19	0	0	19	2	24	0	19	chr5_173317400
chr5	173317498	173317498	7.4	7.4%_27r	chr5	173317498	STC2	EXON	0	25	2	0	27	0	30	0	0	30	2	27	0	30	chr5_173317498
chr5	173317911	173317911	12.5	12.5%_24r	chr5	173317911	STC2	EXON	0	21	3	0	24	0	23	0	0	23	3	24	0	23	chr5_173317911
chr5	173317966	173317966	17.6	17.6%_34r	chr5	173317966	STC2	EXON	0	28	6	0	34	0	31	0	0	31	6	34	0	31	chr5_173317966
chr5	173318229	173318229	6.7	6.7%_30r	chr5	173318229	STC2	EXON	0	28	2	0	30	0	32	0	0	32	2	30	0	32	chr5_173318229
chr5	173325882	173325882	8	8.0%_25r	chr5	173325882	STC2	EXON	0	23	2	0	25	0	20	0	0	20	2	25	0	20	chr5_173325882
chr5	131200555	131200555	58.5	58.5%_41r	chr5	131200555	LYRM7	EXON	17	0	0	24	41	32	0	0	0	32	24	41	0	32	chr5_131200555
chr5	131200927	131200927	9.1	9.1%_22r	chr5	131200927	LYRM7	EXON	20	0	0	2	22	23	0	0	0	23	2	22	0	23	chr5_131200927
chr5	131201055	131201055	6.1	6.1%_33r	chr5	131201055	LYRM7	EXON	30	1	0	2	33	15	0	0	0	15	2	33	0	15	chr5_131201055
chr5	83195807	83195807	8.3	8.3%_24r	chr5	83195807	XRCC4	EXON	22	0	0	2	24	21	0	0	0	21	2	24	0	21	chr5_83195807
chr5	83195817	83195817	9.5	9.5%_21r	chr5	83195817	XRCC4	EXON	19	0	0	2	21	20	0	0	0	20	2	21	0	20	chr5_83195817
chr5	83195924	83195924	18.2	18.2%_22r	chr5	83195924	XRCC4	EXON	18	0	0	4	22	13	0	0	0	13	4	22	0	13	chr5_83195924
chr5	83195931	83195931	19	19.0%_21r	chr5	83195931	XRCC4	EXON	17	0	0	4	21	11	0	0	0	11	4	21	0	11	chr5_83195931
chr5	83258666	83258666	10	10.0%_20r	chr5	83258666	XRCC4	EXON	18	0	0	2	20	23	0	0	0	23	2	20	0	23	chr5_83258666
chr5	83353272	83353272	6.1	6.1%_33r	chr5	83353272	XRCC4	EXON	31	0	0	2	33	23	0	0	0	23	2	33	0	23	chr5_83353272
chr5	33460968	33460968	7.5	7.5%_212r	chr5	33460968	TARS1	EXON	196	0	0	16	212	200	0	0	0	200	16	212	0	200	chr5_33460968
chr5	33461028	33461028	8.9	8.9%_302r	chr5	33461028	TARS1	EXON	274	0	1	27	302	284	1	0	0	285	27	302	0	285	chr5_33461028
chr5	33461669	33461669	11.9	11.9%_168r	chr5	33461669	TARS1	EXON	148	0	0	20	168	148	0	0	0	148	20	168	0	148	chr5_33461669
chr5	33463786	33463786	7	7.0%_256r	chr5	33463786	TARS1	EXON	238	0	0	18	256	225	0	0	0	225	18	256	0	225	chr5_33463786
chr5	33466931	33466931	18.3	18.3%_399r	chr5	33466931	TARS1	EXON	325	1	0	73	399	369	0	0	0	369	73	399	0	369	chr5_33466931
chr5	65664525	65664525	8.9	8.9%_79r	chr5	65664525	TRAPPC13	EXON	72	0	0	7	79	62	0	0	0	62	7	79	0	62	chr5_65664525
chr5	74720430	74720430	8.6	8.6%_152r	chr5	74720430	HEXB	EXON	139	0	0	13	152	85	0	0	0	85	13	152	0	85	chr5_74720430
chr5	151786634	151786634	10.3	10.3%_116r	chr5	151786634	G3BP1	EXON	104	0	0	12	116	111	0	0	0	111	12	116	0	111	chr5_151786634
chr5	151803950	151803950	7.5	7.5%_147r	chr5	151803950	G3BP1	EXON	134	0	2	11	147	122	1	2	0	125	11	147	0	125	chr5_151803950
chr5	151804068	151804068	11.5	11.5%_174r	chr5	151804068	G3BP1	EXON	152	0	2	20	174	157	1	1	0	159	20	174	0	159	chr5_151804068
chr5	151804092	151804092	15.8	15.8%_171r	chr5	151804092	G3BP1	EXON	144	0	0	27	171	164	0	0	0	164	27	171	0	164	chr5_151804092
chr5	151804122	151804122	17.8	17.8%_163r	chr5	151804122	G3BP1	EXON	132	0	2	29	163	182	2	0	0	184	29	163	0	184	chr5_151804122
chr5	151804574	151804574	18.6	18.6%_129r	chr5	151804574	G3BP1	EXON	105	0	0	24	129	137	1	0	0	138	24	129	0	138	chr5_151804574
chr5	151804611	151804611	7.7	7.7%_130r	chr5	151804611	G3BP1	EXON	120	0	0	10	130	127	1	0	0	128	10	130	0	128	chr5_151804611
chr5	151805118	151805118	9.8	9.8%_163r	chr5	151805118	G3BP1	EXON	147	0	0	16	163	127	0	0	0	127	16	163	0	127	chr5_151805118
chr5	151103673	151103673	30.4	30.4%_69r	chr5	151103673	ANXA6	EXON	0	48	21	0	69	0	55	0	1	56	21	69	0	56	chr5_151103673
chr5	151126469	151126469	6.3	6.3%_63r	chr5	151126469	ANXA6	EXON	1	58	4	0	63	0	65	0	0	65	4	63	0	65	chr5_151126469
chr5	151134477	151134477	6.3	6.3%_95r	chr5	151134477	ANXA6	EXON	0	88	6	1	95	0	90	0	0	90	6	95	0	90	chr5_151134477
chr5	151139354	151139354	14.1	14.1%_64r	chr5	151139354	ANXA6	EXON	0	55	9	0	64	0	55	0	0	55	9	64	0	55	chr5_151139354
chr5	40825619	40825619	8.7	8.7%_23r	chr5	40825619	RPL37	EXON	0	21	2	0	23	0	20	0	0	20	2	23	0	20	chr5_40825619
chr5	40825640	40825640	7.7	7.7%_26r	chr5	40825640	RPL37	EXON	0	24	2	0	26	0	19	0	0	19	2	26	0	19	chr5_40825640
chr5	40825650	40825650	10	10.0%_20r	chr5	40825650	RPL37	EXON	0	18	2	0	20	0	18	0	0	18	2	20	0	18	chr5_40825650
chr5	40826439	40826439	13.6	13.6%_22r	chr5	40826439	RPL37	EXON	0	19	3	0	22	0	20	0	0	20	3	22	0	20	chr5_40826439
chr5	40826676	40826676	9.1	9.1%_22r	chr5	40826676	RPL37	EXON	0	20	2	0	22	0	16	0	0	16	2	22	0	16	chr5_40826676
chr5	40826798	40826798	9.1	9.1%_22r	chr5	40826798	RPL37	EXON	0	20	2	0	22	0	14	0	0	14	2	22	0	14	chr5_40826798
chr5	40827066	40827066	20	20.0%_20r	chr5	40827066	RPL37	EXON	0	16	4	0	20	0	12	0	0	12	4	20	0	12	chr5_40827066
chr5	40827122	40827122	8.3	8.3%_24r	chr5	40827122	RPL37	EXON	0	22	2	0	24	0	17	0	0	17	2	24	0	17	chr5_40827122
chr5	40827237	40827237	18.2	18.2%_22r	chr5	40827237	RPL37	EXON	0	18	4	0	22	0	12	0	0	12	4	22	0	12	chr5_40827237
chr5	40827256	40827256	25	25.0%_24r	chr5	40827256	RPL37	EXON	0	18	6	0	24	0	10	0	0	10	6	24	0	10	chr5_40827256
chr5	149980787	149980787	27.3	27.3%_22r	chr5	149980787	SLC26A2	EXON	16	0	0	6	22	21	0	0	0	21	6	22	0	21	chr5_149980787
chr5	149981927	149981927	66.7	66.7%_21r	chr5	149981927	SLC26A2	EXON	7	0	0	14	21	18	0	0	0	18	14	21	0	18	chr5_149981927
chr5	149982249	149982249	23.1	23.1%_26r	chr5	149982249	SLC26A2	EXON	20	0	0	6	26	26	0	0	0	26	6	26	0	26	chr5_149982249
chr5	173607904	173607904	6.4	6.4%_78r	chr5	173607904	BOD1	EXON	0	73	5	0	78	0	53	0	0	53	5	78	0	53	chr5_173607904
chr5	173607964	173607964	6.1	6.1%_99r	chr5	173607964	BOD1	EXON	0	93	6	0	99	0	87	0	0	87	6	99	0	87	chr5_173607964
chr5	173608066	173608066	9	9.0%_89r	chr5	173608066	BOD1	EXON	0	81	8	0	89	0	80	0	0	80	8	89	0	80	chr5_173608066
chr5	173608071	173608071	45.3	45.3%_95r	chr5	173608071	BOD1	EXON	0	52	43	0	95	0	85	0	0	85	43	95	0	85	chr5_173608071
chr5	173608162	173608162	8.3	8.3%_48r	chr5	173608162	BOD1	EXON	0	44	4	0	48	0	44	0	1	45	4	48	0	45	chr5_173608162
chr5	173609240	173609240	11.1	11.1%_54r	chr5	173609240	BOD1	EXON	0	48	6	0	54	0	54	0	0	54	6	54	0	54	chr5_173609240
chr5	78002789	78002789	7.7	7.7%_39r	chr5	78002789	AP3B1	EXON	0	36	3	0	39	0	20	0	0	20	3	39	0	20	chr5_78002789
chr5	78002794	78002794	18.4	18.4%_38r	chr5	78002794	AP3B1	EXON	0	31	7	0	38	0	20	0	0	20	7	38	0	20	chr5_78002794
chr5	78015460	78015460	30.2	30.2%_43r	chr5	78015460	AP3B1	EXON	0	30	13	0	43	0	24	0	0	24	13	43	0	24	chr5_78015460
chr5	78015467	78015467	28.1	28.1%_32r	chr5	78015467	AP3B1	EXON	0	23	9	0	32	0	18	0	0	18	9	32	0	18	chr5_78015467
chr5	78128125	78128125	7.1	7.1%_28r	chr5	78128125	AP3B1	EXON	0	26	2	0	28	0	17	0	0	17	2	28	0	17	chr5_78128125
chr5	78141307	78141307	10.7	10.7%_28r	chr5	78141307	AP3B1	EXON	1	24	3	0	28	0	30	0	0	30	3	28	0	30	chr5_78141307
chr5	78216096	78216096	10.7	10.7%_28r	chr5	78216096	AP3B1	EXON	0	25	3	0	28	0	31	0	0	31	3	28	0	31	chr5_78216096
chr5	78227508	78227508	7.1	7.1%_28r	chr5	78227508	AP3B1	EXON	0	26	2	0	28	0	31	0	0	31	2	28	0	31	chr5_78227508
chr5	115524753	115524753	10	10.0%_20r	chr5	115524753	FEM1C	EXON	0	18	2	0	20	0	16	0	0	16	2	20	0	16	chr5_115524753
chr5	115525614	115525614	9.5	9.5%_21r	chr5	115525614	FEM1C	EXON	0	19	2	0	21	0	14	0	0	14	2	21	0	14	chr5_115525614
chr5	122818834	122818834	7.5	7.5%_120r	chr5	122818834	SNX2	EXON	111	0	0	9	120	143	0	0	0	143	9	120	0	143	chr5_122818834
chr5	122818895	122818895	7.3	7.3%_246r	chr5	122818895	SNX2	EXON	227	0	1	18	246	222	0	0	0	222	18	246	0	222	chr5_122818895
chr5	122819009	122819009	12	12.0%_183r	chr5	122819009	SNX2	EXON	161	0	0	22	183	141	0	0	0	141	22	183	0	141	chr5_122819009
chr5	122826104	122826104	23.1	23.1%_108r	chr5	122826104	SNX2	EXON	83	0	0	25	108	119	1	0	0	120	25	108	0	120	chr5_122826104
chr5	122827417	122827417	6.2	6.2%_162r	chr5	122827417	SNX2	EXON	151	1	0	10	162	121	0	0	0	121	10	162	0	121	chr5_122827417
chr5	140677717	140677717	6.9	6.9%_145r	chr5	140677717	HARS1	EXON	1	134	10	0	145	0	160	0	0	160	10	145	0	160	chr5_140677717
chr5	132262625	132262625	23.8	23.8%_21r	chr5	132262625	PDLIM4	EXON	16	0	0	5	21	16	0	0	0	16	5	21	0	16	chr5_132262625
chr5	115829596	115829596	8.3	8.3%_24r	chr5	115829596	ATG12	EXON	1	21	2	0	24	0	12	0	0	12	2	24	0	12	chr5_115829596
chr5	115830626	115830626	34.4	34.4%_32r	chr5	115830626	ATG12	EXON	0	21	11	0	32	0	20	0	0	20	11	32	0	20	chr5_115830626
chr5	115830653	115830653	12.5	12.5%_24r	chr5	115830653	ATG12	EXON	0	21	3	0	24	0	17	0	0	17	3	24	0	17	chr5_115830653
chr5	115830748	115830748	12.5	12.5%_40r	chr5	115830748	ATG12	EXON	0	35	5	0	40	0	27	0	0	27	5	40	0	27	chr5_115830748
chr5	115831065	115831065	7.8	7.8%_77r	chr5	115831065	ATG12	EXON	0	71	6	0	77	0	41	0	0	41	6	77	0	41	chr5_115831065
chr5	176384170	176384170	11.6	11.6%_259r	chr5	176384170	NOP16	EXON	0	229	30	0	259	0	208	0	0	208	30	259	0	208	chr5_176384170
chr5	177402227	177402227	8.3	8.3%_24r	chr5	177402227	F12	EXON	1	21	2	0	24	0	36	0	0	36	2	24	0	36	chr5_177402227
chr5	177402356	177402356	13.9	13.9%_36r	chr5	177402356	F12	EXON	0	31	5	0	36	0	28	0	1	29	5	36	0	29	chr5_177402356
chr5	177402551	177402551	26.9	26.9%_26r	chr5	177402551	F12	EXON	0	19	7	0	26	0	36	0	0	36	7	26	0	36	chr5_177402551
chr5	177402658	177402658	8.6	8.6%_35r	chr5	177402658	F12	EXON	0	32	3	0	35	0	42	0	0	42	3	35	0	42	chr5_177402658
chr5	177403495	177403495	9.1	9.1%_22r	chr5	177403495	F12	EXON	0	20	2	0	22	0	23	0	0	23	2	22	0	23	chr5_177403495
chr5	177403578	177403578	35	35.0%_20r	chr5	177403578	F12	EXON	0	12	7	1	20	0	27	0	0	27	7	20	0	27	chr5_177403578
chr5	177594278	177594278	6.5	6.5%_155r	chr5	177594278	TMED9	EXON	145	0	0	10	155	101	0	0	0	101	10	155	0	101	chr5_177594278
chr5	177595555	177595555	6.8	6.8%_147r	chr5	177595555	TMED9	EXON	137	0	0	10	147	75	0	0	0	75	10	147	0	75	chr5_177595555
chr5	177595795	177595795	7.3	7.3%_82r	chr5	177595795	TMED9	EXON	76	0	0	6	82	47	0	0	0	47	6	82	0	47	chr5_177595795
chr5	177595805	177595805	12.8	12.8%_94r	chr5	177595805	TMED9	EXON	82	0	0	12	94	53	0	0	0	53	12	94	0	53	chr5_177595805
chr5	177595864	177595864	38	38.0%_100r	chr5	177595864	TMED9	EXON	62	0	0	38	100	60	0	0	0	60	38	100	0	60	chr5_177595864
chr5	177596038	177596038	21.7	21.7%_92r	chr5	177596038	TMED9	EXON	72	0	0	20	92	48	0	0	0	48	20	92	0	48	chr5_177596038
chr5	176392791	176392791	12.6	12.6%_127r	chr5	176392791	CLTB	EXON	0	110	16	1	127	0	132	0	2	134	16	127	0	134	chr5_176392791
chr5	176392841	176392841	13.1	13.1%_130r	chr5	176392841	CLTB	EXON	0	113	17	0	130	0	124	0	0	124	17	130	0	124	chr5_176392841
chr5	176392844	176392844	15.5	15.5%_142r	chr5	176392844	CLTB	EXON	0	120	22	0	142	0	143	0	0	143	22	142	0	143	chr5_176392844
chr5	134727262	134727262	39.1	39.1%_23r	chr5	134727262	SEC24A	EXON	14	0	0	9	23	22	0	0	0	22	9	23	0	22	chr5_134727262
chr5	134727266	134727266	30.8	30.8%_26r	chr5	134727266	SEC24A	EXON	18	0	0	8	26	21	1	0	0	22	8	26	0	22	chr5_134727266
chr5	134727521	134727521	6.2	6.2%_32r	chr5	134727521	SEC24A	EXON	30	0	0	2	32	23	0	0	0	23	2	32	0	23	chr5_134727521
chr5	134727525	134727525	6.1	6.1%_33r	chr5	134727525	SEC24A	EXON	31	0	0	2	33	22	0	0	0	22	2	33	0	22	chr5_134727525
chr5	176656770	176656770	10	10.0%_20r	chr5	176656770	TSPAN17	EXON	18	0	0	2	20	11	0	0	0	11	2	20	0	11	chr5_176656770
chr5	176656919	176656919	8.3	8.3%_24r	chr5	176656919	TSPAN17	EXON	22	0	0	2	24	19	0	0	0	19	2	24	0	19	chr5_176656919
chr5	176658380	176658380	19.2	19.2%_26r	chr5	176658380	TSPAN17	EXON	21	0	0	5	26	12	0	0	0	12	5	26	0	12	chr5_176658380
chr5	176658574	176658574	25	25.0%_24r	chr5	176658574	TSPAN17	EXON	18	0	0	6	24	18	0	0	0	18	6	24	0	18	chr5_176658574
chr5	176658582	176658582	17.4	17.4%_23r	chr5	176658582	TSPAN17	EXON	19	0	0	4	23	18	0	0	0	18	4	23	0	18	chr5_176658582
chr5	176658584	176658584	23.8	23.8%_21r	chr5	176658584	TSPAN17	EXON	16	0	0	5	21	17	0	0	0	17	5	21	0	17	chr5_176658584
chr5	176658980	176658980	8.3	8.3%_24r	chr5	176658980	TSPAN17	EXON	22	0	0	2	24	16	0	0	0	16	2	24	0	16	chr5_176658980
chr5	16453097	16453097	6.5	6.5%_62r	chr5	16453097	ZNF622	EXON	0	58	4	0	62	0	64	0	0	64	4	62	0	64	chr5_16453097
chr5	16453151	16453151	6.4	6.4%_94r	chr5	16453151	ZNF622	EXON	0	88	6	0	94	0	64	0	0	64	6	94	0	64	chr5_16453151
chr5	16463117	16463117	11.2	11.2%_89r	chr5	16463117	ZNF622	EXON	0	79	10	0	89	0	77	0	0	77	10	89	0	77	chr5_16463117
chr5	16463200	16463200	6.1	6.1%_82r	chr5	16463200	ZNF622	EXON	0	77	5	0	82	0	66	0	0	66	5	82	0	66	chr5_16463200
chr5	16463502	16463502	9.3	9.3%_108r	chr5	16463502	ZNF622	EXON	0	98	10	0	108	0	82	0	0	82	10	108	0	82	chr5_16463502
chr5	16463584	16463584	7.9	7.9%_63r	chr5	16463584	ZNF622	EXON	0	56	5	2	63	0	50	0	0	50	5	63	0	50	chr5_16463584
chr5	16465058	16465058	12.1	12.1%_58r	chr5	16465058	ZNF622	EXON	0	51	7	0	58	0	58	0	0	58	7	58	0	58	chr5_16465058
chr5	16465060	16465060	8.2	8.2%_61r	chr5	16465060	ZNF622	EXON	0	56	5	0	61	0	60	0	0	60	5	61	0	60	chr5_16465060
chr5	16465179	16465179	9.2	9.2%_76r	chr5	16465179	ZNF622	EXON	0	69	7	0	76	0	60	0	0	60	7	76	0	60	chr5_16465179
chr5	16465250	16465250	10.9	10.9%_64r	chr5	16465250	ZNF622	EXON	1	56	7	0	64	0	50	0	0	50	7	64	0	50	chr5_16465250
chr5	16465421	16465421	12	12.0%_50r	chr5	16465421	ZNF622	EXON	0	44	6	0	50	0	47	0	0	47	6	50	0	47	chr5_16465421
chr5	16465577	16465577	14.5	14.5%_62r	chr5	16465577	ZNF622	EXON	0	53	9	0	62	0	57	0	0	57	9	62	0	57	chr5_16465577
chr5	126603578	126603578	36.5	36.5%_52r	chr5	126603578	PHAX	EXON	33	0	0	19	52	45	0	0	0	45	19	52	0	45	chr5_126603578
chr5	126604182	126604182	10	10.0%_100r	chr5	126604182	PHAX	EXON	90	0	0	10	100	98	0	0	0	98	10	100	0	98	chr5_126604182
chr5	126617310	126617310	31	31.0%_145r	chr5	126617310	PHAX	EXON	100	0	0	45	145	151	0	0	0	151	45	145	0	151	chr5_126617310
chr5	126617313	126617313	6.2	6.2%_146r	chr5	126617313	PHAX	EXON	137	0	0	9	146	160	0	0	0	160	9	146	0	160	chr5_126617313
chr5	126625476	126625476	13	13.0%_23r	chr5	126625476	PHAX	EXON	20	0	0	3	23	14	0	0	0	14	3	23	0	14	chr5_126625476
chr5	126626108	126626108	6.7	6.7%_30r	chr5	126626108	PHAX	EXON	28	0	0	2	30	15	0	0	0	15	2	30	0	15	chr5_126626108
chr5	176308425	176308425	13.6	13.6%_22r	chr5	176308425	SIMC1	INTRON	19	0	0	3	22	23	0	0	0	23	3	22	0	23	chr5_176308425
chr5	126870390	126870390	35	35.0%_20r	chr5	126870390	MARCHF3	EXON	0	13	7	0	20	0	16	0	0	16	7	20	0	16	chr5_126870390
chr5	126870548	126870548	16.1	16.1%_31r	chr5	126870548	MARCHF3	EXON	1	25	5	0	31	0	26	0	0	26	5	31	0	26	chr5_126870548
chr5	126870563	126870563	6.5	6.5%_31r	chr5	126870563	MARCHF3	EXON	0	29	2	0	31	0	27	0	0	27	2	31	0	27	chr5_126870563
chr5	126870585	126870585	8.3	8.3%_24r	chr5	126870585	MARCHF3	EXON	0	22	2	0	24	0	16	0	0	16	2	24	0	16	chr5_126870585
chr5	126870644	126870644	10	10.0%_20r	chr5	126870644	MARCHF3	EXON	0	17	2	1	20	0	11	0	0	11	2	20	0	11	chr5_126870644
chr5	126870649	126870649	33.3	33.3%_21r	chr5	126870649	MARCHF3	EXON	0	14	7	0	21	0	13	0	0	13	7	21	0	13	chr5_126870649
chr5	126870650	126870650	9.5	9.5%_21r	chr5	126870650	MARCHF3	EXON	0	19	2	0	21	0	13	0	0	13	2	21	0	13	chr5_126870650
chr5	126870661	126870661	8	8.0%_25r	chr5	126870661	MARCHF3	EXON	0	23	2	0	25	0	14	0	0	14	2	25	0	14	chr5_126870661
chr5	132756249	132756249	42.9	42.9%_28r	chr5	132756249	SEPTIN8	EXON	0	16	12	0	28	0	28	0	0	28	12	28	0	28	chr5_132756249
chr5	132756280	132756280	13.6	13.6%_22r	chr5	132756280	SEPTIN8	EXON	0	19	3	0	22	0	21	0	0	21	3	22	0	21	chr5_132756280
chr5	132756296	132756296	17.9	17.9%_28r	chr5	132756296	SEPTIN8	EXON	0	23	5	0	28	0	23	0	0	23	5	28	0	23	chr5_132756296
chr5	132756310	132756310	10	10.0%_20r	chr5	132756310	SEPTIN8	EXON	0	18	2	0	20	0	16	0	0	16	2	20	0	16	chr5_132756310
chr5	132756331	132756331	13	13.0%_23r	chr5	132756331	SEPTIN8	EXON	0	20	3	0	23	0	18	0	0	18	3	23	0	18	chr5_132756331
chr5	132756506	132756506	17.9	17.9%_28r	chr5	132756506	SEPTIN8	EXON	0	23	5	0	28	0	19	0	0	19	5	28	0	19	chr5_132756506
chr5	132756767	132756767	6.7	6.7%_30r	chr5	132756767	SEPTIN8	EXON	0	28	2	0	30	0	23	0	0	23	2	30	0	23	chr5_132756767
chr5	132757002	132757002	19.2	19.2%_26r	chr5	132757002	SEPTIN8	EXON	0	21	5	0	26	0	22	0	0	22	5	26	0	22	chr5_132757002
chr5	132757275	132757275	10	10.0%_20r	chr5	132757275	SEPTIN8	EXON	0	18	2	0	20	0	11	0	0	11	2	20	0	11	chr5_132757275
chr5	132757577	132757577	8	8.0%_25r	chr5	132757577	SEPTIN8	EXON	0	23	2	0	25	0	21	0	0	21	2	25	0	21	chr5_132757577
chr5	132757602	132757602	8.7	8.7%_23r	chr5	132757602	SEPTIN8	EXON	0	21	2	0	23	0	18	0	0	18	2	23	0	18	chr5_132757602
chr5	132757606	132757606	28	28.0%_25r	chr5	132757606	SEPTIN8	EXON	0	18	7	0	25	0	27	0	0	27	7	25	0	27	chr5_132757606
chr5	132757637	132757637	65.2	65.2%_23r	chr5	132757637	SEPTIN8	EXON	0	8	15	0	23	0	28	0	0	28	15	23	0	28	chr5_132757637
chr5	132757713	132757713	13.6	13.6%_22r	chr5	132757713	SEPTIN8	EXON	0	19	3	0	22	0	24	0	0	24	3	22	0	24	chr5_132757713
chr5	132757717	132757717	22.7	22.7%_22r	chr5	132757717	SEPTIN8	EXON	0	17	5	0	22	0	23	0	0	23	5	22	0	23	chr5_132757717
chr5	132757721	132757721	20	20.0%_20r	chr5	132757721	SEPTIN8	EXON	0	16	4	0	20	0	22	0	0	22	4	20	0	22	chr5_132757721
chr5	132757782	132757782	9.1	9.1%_22r	chr5	132757782	SEPTIN8	EXON	0	20	2	0	22	0	29	0	0	29	2	22	0	29	chr5_132757782
chr5	132757784	132757784	27.3	27.3%_22r	chr5	132757784	SEPTIN8	EXON	0	16	6	0	22	0	29	0	0	29	6	22	0	29	chr5_132757784
chr5	132757870	132757870	7.7	7.7%_26r	chr5	132757870	SEPTIN8	EXON	0	24	2	0	26	0	31	0	0	31	2	26	0	31	chr5_132757870
chr5	132758006	132758006	20.7	20.7%_29r	chr5	132758006	SEPTIN8	EXON	0	23	6	0	29	0	24	0	0	24	6	29	0	24	chr5_132758006
chr5	132758014	132758014	9.1	9.1%_22r	chr5	132758014	SEPTIN8	EXON	0	20	2	0	22	0	24	0	0	24	2	22	0	24	chr5_132758014
chr5	132758110	132758110	16.7	16.7%_24r	chr5	132758110	SEPTIN8	EXON	0	20	4	0	24	0	21	0	0	21	4	24	0	21	chr5_132758110
chr5	132758179	132758179	8	8.0%_50r	chr5	132758179	SEPTIN8	EXON	0	46	4	0	50	0	55	0	0	55	4	50	0	55	chr5_132758179
chr5	132758186	132758186	13.2	13.2%_53r	chr5	132758186	SEPTIN8	EXON	0	46	7	0	53	0	47	0	0	47	7	53	0	47	chr5_132758186
chr5	132758438	132758438	11.6	11.6%_43r	chr5	132758438	SEPTIN8	EXON	0	38	5	0	43	0	40	0	0	40	5	43	0	40	chr5_132758438
chr5	132758467	132758467	25	25.0%_28r	chr5	132758467	SEPTIN8	EXON	0	21	7	0	28	0	31	0	0	31	7	28	0	31	chr5_132758467
chr5	132758805	132758805	20.9	20.9%_43r	chr5	132758805	SEPTIN8	EXON	0	34	9	0	43	0	34	0	0	34	9	43	0	34	chr5_132758805
chr5	132761820	132761820	16.7	16.7%_36r	chr5	132761820	SEPTIN8	EXON	0	30	6	0	36	0	38	0	0	38	6	36	0	38	chr5_132761820
chr5	168492766	168492766	22.4	22.4%_156r	chr5	168492766	RARS1	EXON	121	0	0	35	156	136	0	0	0	136	35	156	0	136	chr5_168492766
chr5	168500601	168500601	10	10.0%_270r	chr5	168500601	RARS1	EXON	242	0	1	27	270	268	0	0	0	268	27	270	0	268	chr5_168500601
chr5	168500631	168500631	14	14.0%_264r	chr5	168500631	RARS1	EXON	227	0	0	37	264	226	0	0	0	226	37	264	0	226	chr5_168500631
chr5	168500684	168500684	6.9	6.9%_216r	chr5	168500684	RARS1	EXON	201	0	0	15	216	198	0	0	0	198	15	216	0	198	chr5_168500684
chr5	168506176	168506176	40.1	40.1%_222r	chr5	168506176	RARS1	EXON	133	0	0	89	222	221	0	0	0	221	89	222	0	221	chr5_168506176
chr5	168506735	168506735	8.1	8.1%_210r	chr5	168506735	RARS1	EXON	193	0	0	17	210	177	0	0	0	177	17	210	0	177	chr5_168506735
chr5	168506740	168506740	7.1	7.1%_212r	chr5	168506740	RARS1	EXON	196	1	0	15	212	199	0	0	0	199	15	212	0	199	chr5_168506740
chr5	168516837	168516837	15.3	15.3%_222r	chr5	168516837	RARS1	EXON	188	0	0	34	222	237	1	0	0	238	34	222	0	238	chr5_168516837
chr5	168517860	168517860	11.1	11.1%_135r	chr5	168517860	RARS1	EXON	120	0	0	15	135	124	0	0	0	124	15	135	0	124	chr5_168517860
chr5	133052135	133052135	23.7	23.7%_139r	chr5	133052135	HSPA4	EXON	106	0	0	33	139	153	0	1	0	154	33	139	0	154	chr5_133052135
chr5	133052291	133052291	9.8	9.8%_183r	chr5	133052291	HSPA4	EXON	165	0	0	18	183	168	0	1	0	169	18	183	0	169	chr5_133052291
chr5	133073282	133073282	7.3	7.3%_329r	chr5	133073282	HSPA4	EXON	305	0	0	24	329	286	0	0	0	287	24	329	0	287	chr5_133073282
chr5	133074005	133074005	10	10.0%_311r	chr5	133074005	HSPA4	EXON	280	0	0	31	311	330	0	0	0	330	31	311	0	330	chr5_133074005
chr5	133074086	133074086	8.3	8.3%_290r	chr5	133074086	HSPA4	EXON	266	0	0	24	290	290	0	0	0	290	24	290	0	290	chr5_133074086
chr5	133076731	133076731	10.4	10.4%_212r	chr5	133076731	HSPA4	EXON	190	0	0	22	212	212	0	0	0	212	22	212	0	212	chr5_133076731
chr5	133076782	133076782	10.9	10.9%_293r	chr5	133076782	HSPA4	EXON	260	1	0	32	293	258	0	0	0	258	32	293	0	258	chr5_133076782
chr5	133076897	133076897	51.2	51.2%_213r	chr5	133076897	HSPA4	EXON	103	0	1	109	213	252	0	0	0	252	109	213	0	252	chr5_133076897
chr5	133089582	133089582	6.6	6.6%_166r	chr5	133089582	HSPA4	EXON	155	0	0	11	166	155	0	0	0	155	11	166	0	155	chr5_133089582
chr5	133089607	133089607	7.3	7.3%_233r	chr5	133089607	HSPA4	EXON	215	0	1	17	233	233	0	1	0	234	17	233	0	234	chr5_133089607
chr5	133089627	133089627	15.3	15.3%_255r	chr5	133089627	HSPA4	EXON	216	0	0	39	255	238	0	0	0	238	39	255	0	238	chr5_133089627
chr5	133089631	133089631	25.3	25.3%_257r	chr5	133089631	HSPA4	EXON	192	0	0	65	257	248	1	1	0	250	65	257	0	250	chr5_133089631
chr5	133091229	133091229	9.7	9.7%_185r	chr5	133091229	HSPA4	EXON	167	0	0	18	185	185	0	0	0	185	18	185	0	185	chr5_133091229
chr5	133091244	133091244	14	14.0%_172r	chr5	133091244	HSPA4	EXON	148	0	0	24	172	170	0	0	0	170	24	172	0	170	chr5_133091244
chr5	133092767	133092767	7.1	7.1%_226r	chr5	133092767	HSPA4	EXON	208	1	1	16	226	211	0	2	0	213	16	226	0	213	chr5_133092767
chr5	133092780	133092780	12.2	12.2%_213r	chr5	133092780	HSPA4	EXON	187	0	0	26	213	196	1	0	0	197	26	213	0	197	chr5_133092780
chr5	133096246	133096246	9.3	9.3%_172r	chr5	133096246	HSPA4	EXON	156	0	0	16	172	205	0	0	0	205	16	172	0	205	chr5_133096246
chr5	133099636	133099636	64.1	64.1%_206r	chr5	133099636	HSPA4	EXON	74	0	0	132	206	180	0	0	0	180	132	206	0	180	chr5_133099636
chr5	133101774	133101774	7.2	7.2%_276r	chr5	133101774	HSPA4	EXON	256	0	0	20	276	229	1	0	0	230	20	276	0	230	chr5_133101774
chr5	133101778	133101778	13.9	13.9%_281r	chr5	133101778	HSPA4	EXON	242	0	0	39	281	227	0	0	0	227	39	281	0	227	chr5_133101778
chr5	133101857	133101857	6.8	6.8%_237r	chr5	133101857	HSPA4	EXON	221	0	0	16	237	223	0	0	0	223	16	237	0	223	chr5_133101857
chr5	133103878	133103878	7.5	7.5%_281r	chr5	133103878	HSPA4	EXON	260	0	0	21	281	272	0	0	0	272	21	281	0	272	chr5_133103878
chr5	133104668	133104668	8.7	8.7%_23r	chr5	133104668	HSPA4	EXON	21	0	0	2	23	27	0	0	0	27	2	23	0	27	chr5_133104668
chr5	133106200	133106200	8.8	8.8%_34r	chr5	133106200	HSPA4	EXON	31	0	0	3	34	39	0	0	0	39	3	34	0	39	chr5_133106200
chr5	133106251	133106251	12.8	12.8%_39r	chr5	133106251	HSPA4	EXON	34	0	0	5	39	33	0	0	0	33	5	39	0	33	chr5_133106251
chr5	82178557	82178557	16	16.0%_25r	chr5	82178557	ATG10	EXON	21	0	0	4	25	12	0	0	0	12	4	25	0	12	chr5_82178557
chr5	82253327	82253327	7.1	7.1%_28r	chr5	82253327	ATG10	EXON	26	0	0	2	28	20	0	0	0	20	2	28	0	20	chr5_82253327
chr5	154863238	154863238	8.2	8.2%_49r	chr5	154863238	CNOT8	EXON	45	0	0	4	49	40	0	0	0	40	4	49	0	40	chr5_154863238
chr5	154863254	154863254	16.3	16.3%_43r	chr5	154863254	CNOT8	EXON	35	1	0	7	43	27	0	0	0	27	7	43	0	27	chr5_154863254
chr5	154863266	154863266	28.9	28.9%_38r	chr5	154863266	CNOT8	EXON	27	0	0	11	38	26	0	0	0	26	11	38	0	26	chr5_154863266
chr5	154863366	154863366	50	50.0%_42r	chr5	154863366	CNOT8	EXON	21	0	0	21	42	45	0	0	0	45	21	42	0	45	chr5_154863366
chr5	154871834	154871834	7.2	7.2%_69r	chr5	154871834	CNOT8	EXON	64	0	0	5	69	92	0	0	0	92	5	69	0	92	chr5_154871834
chr5	154875872	154875872	8.5	8.5%_59r	chr5	154875872	CNOT8	EXON	54	0	0	5	59	55	0	0	0	55	5	59	0	55	chr5_154875872
chr5	154875918	154875918	10.5	10.5%_57r	chr5	154875918	CNOT8	EXON	51	0	0	6	57	44	0	0	0	44	6	57	0	44	chr5_154875918
chr5	154876215	154876215	13.2	13.2%_68r	chr5	154876215	CNOT8	EXON	59	0	0	9	68	43	0	0	0	43	9	68	0	43	chr5_154876215
chr5	154876539	154876539	6.5	6.5%_46r	chr5	154876539	CNOT8	EXON	43	0	0	3	46	41	0	0	0	41	3	46	0	41	chr5_154876539
chr5	154876541	154876541	14.9	14.9%_47r	chr5	154876541	CNOT8	EXON	40	0	0	7	47	41	0	0	0	41	7	47	0	41	chr5_154876541
chr5	154876585	154876585	7.3	7.3%_41r	chr5	154876585	CNOT8	EXON	38	0	0	3	41	28	0	0	0	28	3	41	0	28	chr5_154876585
chr5	154876586	154876586	45	45.0%_40r	chr5	154876586	CNOT8	EXON	22	0	0	18	40	29	0	0	0	29	18	40	0	29	chr5_154876586
chr5	154876637	154876637	6.5	6.5%_46r	chr5	154876637	CNOT8	EXON	43	0	0	3	46	39	0	0	0	39	3	46	0	39	chr5_154876637
chr5	72208538	72208538	6.8	6.8%_73r	chr5	72208538	MAP1B	EXON	67	0	1	5	73	60	0	0	0	60	5	73	0	60	chr5_72208538
chr5	72208576	72208576	12.7	12.7%_55r	chr5	72208576	MAP1B	EXON	48	0	0	7	55	34	0	0	0	34	7	55	0	34	chr5_72208576
chr5	72209311	72209311	32.7	32.7%_52r	chr5	72209311	MAP1B	EXON	35	0	0	17	52	43	0	0	0	43	17	52	0	43	chr5_72209311
chr5	72209319	72209319	8.1	8.1%_62r	chr5	72209319	MAP1B	EXON	57	0	0	5	62	55	0	0	0	55	5	62	0	55	chr5_72209319
chr5	72209378	72209378	8.4	8.4%_95r	chr5	72209378	MAP1B	EXON	87	0	0	8	95	73	0	0	0	73	8	95	0	73	chr5_72209378
chr5	176389577	176389577	34.3	34.3%_362r	chr5	176389577	HIGD2A	EXON	237	0	1	124	362	285	0	0	0	285	124	362	0	285	chr5_176389577
chr5	176389621	176389621	6.1	6.1%_310r	chr5	176389621	HIGD2A	EXON	291	0	0	19	310	230	0	0	0	230	19	310	0	230	chr5_176389621
chr5	154896165	154896165	7.7	7.7%_26r	chr5	154896165	GEMIN5	EXON	0	24	2	0	26	0	23	0	0	23	2	26	0	23	chr5_154896165
chr5	133955646	133955646	24	24.0%_221r	chr5	133955646	C5orf15	EXON	0	168	53	0	221	0	152	0	0	152	53	221	0	152	chr5_133955646
chr5	133955869	133955869	6.8	6.8%_148r	chr5	133955869	C5orf15	EXON	1	137	10	0	148	0	109	0	0	109	10	148	0	109	chr5_133955869
chr5	132997053	132997053	6.7	6.7%_30r	chr5	132997053	ZCCHC10	EXON	0	28	2	0	30	0	15	0	0	15	2	30	0	15	chr5_132997053
chr5	132997126	132997126	10	10.0%_30r	chr5	132997126	ZCCHC10	EXON	0	27	3	0	30	0	11	0	0	11	3	30	0	11	chr5_132997126
chr5	132997306	132997306	14.3	14.3%_21r	chr5	132997306	ZCCHC10	EXON	0	18	3	0	21	0	10	0	0	10	3	21	0	10	chr5_132997306
chr5	132997555	132997555	7.3	7.3%_41r	chr5	132997555	ZCCHC10	EXON	0	38	3	0	41	0	39	0	0	39	3	41	0	39	chr5_132997555
chr5	132997751	132997751	12.9	12.9%_31r	chr5	132997751	ZCCHC10	EXON	0	27	4	0	31	0	24	0	0	24	4	31	0	24	chr5_132997751
chr5	132997775	132997775	7.1	7.1%_56r	chr5	132997775	ZCCHC10	EXON	0	52	4	0	56	0	27	0	0	27	4	56	0	27	chr5_132997775
chr5	132997820	132997820	11.1	11.1%_27r	chr5	132997820	ZCCHC10	EXON	0	24	3	0	27	0	21	0	0	21	3	27	0	21	chr5_132997820
chr5	132997830	132997830	6.9	6.9%_29r	chr5	132997830	ZCCHC10	EXON	0	27	2	0	29	0	24	0	0	24	2	29	0	24	chr5_132997830
chr5	132997844	132997844	24	24.0%_25r	chr5	132997844	ZCCHC10	EXON	0	19	6	0	25	0	23	0	0	23	6	25	0	23	chr5_132997844
chr5	132997910	132997910	7.7	7.7%_26r	chr5	132997910	ZCCHC10	EXON	0	24	2	0	26	0	27	0	0	27	2	26	0	27	chr5_132997910
chr5	132997913	132997913	8.3	8.3%_24r	chr5	132997913	ZCCHC10	EXON	0	22	2	0	24	0	24	0	0	24	2	24	0	24	chr5_132997913
chr5	132997922	132997922	12.5	12.5%_24r	chr5	132997922	ZCCHC10	EXON	0	21	3	0	24	0	20	0	0	20	3	24	0	20	chr5_132997922
chr5	132998072	132998072	59.2	59.2%_49r	chr5	132998072	ZCCHC10	EXON	0	20	29	0	49	0	34	0	0	34	29	49	0	34	chr5_132998072
chr5	132998093	132998093	21.6	21.6%_51r	chr5	132998093	ZCCHC10	EXON	0	40	11	0	51	0	28	0	0	28	11	51	0	28	chr5_132998093
chr5	132998129	132998129	7	7.0%_57r	chr5	132998129	ZCCHC10	EXON	0	53	4	0	57	0	39	0	0	39	4	57	0	39	chr5_132998129
chr5	132998200	132998200	18.9	18.9%_53r	chr5	132998200	ZCCHC10	EXON	0	43	10	0	53	0	27	0	0	27	10	53	0	27	chr5_132998200
chr5	132998223	132998223	12.5	12.5%_56r	chr5	132998223	ZCCHC10	EXON	0	49	7	0	56	0	37	0	0	37	7	56	0	37	chr5_132998223
chr5	132998336	132998336	7.1	7.1%_28r	chr5	132998336	ZCCHC10	EXON	0	26	2	0	28	0	12	0	0	12	2	28	0	12	chr5_132998336
chr5	132998476	132998476	11.9	11.9%_42r	chr5	132998476	ZCCHC10	EXON	0	37	5	0	42	0	29	0	0	29	5	42	0	29	chr5_132998476
chr5	132998518	132998518	34.6	34.6%_52r	chr5	132998518	ZCCHC10	EXON	0	34	18	0	52	0	20	0	0	20	18	52	0	20	chr5_132998518
chr5	133006805	133006805	6.5	6.5%_31r	chr5	133006805	ZCCHC10	EXON	0	29	2	0	31	0	25	0	0	25	2	31	0	25	chr5_133006805
chr5	32126287	32126287	17.2	17.2%_58r	chr5	32126287	GUSBP1	INTRON	0	48	10	0	58	0	63	0	0	63	10	58	0	63	chr5_32126287
chr5	32126551	32126551	20	20.0%_80r	chr5	32126551	GUSBP1	INTRON	0	64	16	0	80	0	67	0	0	67	16	80	0	67	chr5_32126551
chr5	32135575	32135575	6.1	6.1%_66r	chr5	32135575	GUSBP1	INTRON	0	62	4	0	66	0	66	0	0	66	4	66	0	66	chr5_32135575
chr5	32135606	32135606	13.7	13.7%_51r	chr5	32135606	GUSBP1	INTRON	0	44	7	0	51	0	45	0	0	45	7	51	0	45	chr5_32135606
chr5	32135640	32135640	20.8	20.8%_53r	chr5	32135640	GUSBP1	INTRON	0	42	11	0	53	0	29	0	0	29	11	53	0	29	chr5_32135640
chr5	32143791	32143791	72.4	72.4%_58r	chr5	32143791	GUSBP1	INTRON	0	16	42	0	58	0	66	0	0	66	42	58	0	66	chr5_32143791
chr5	32248876	32248876	6.9	6.9%_29r	chr5	32248876	GUSBP1	INTRON	0	27	2	0	29	0	11	0	0	11	2	29	0	11	chr5_32248876
chr5	32354399	32354399	9.4	9.4%_32r	chr5	32354399	GUSBP1	INTRON	0	29	3	0	32	0	13	0	0	13	3	32	0	13	chr5_32354399
chr5	32354536	32354536	9.2	9.2%_65r	chr5	32354536	GUSBP1	INTRON	0	59	6	0	65	0	43	0	0	43	6	65	0	43	chr5_32354536
chr5	32354547	32354547	6.9	6.9%_58r	chr5	32354547	GUSBP1	INTRON	0	54	4	0	58	0	40	0	0	40	4	58	0	40	chr5_32354547
chr5	32354612	32354612	6.5	6.5%_46r	chr5	32354612	GUSBP1	INTRON	0	43	3	0	46	0	33	0	0	33	3	46	0	33	chr5_32354612
chr5	32354615	32354615	43.9	43.9%_41r	chr5	32354615	GUSBP1	INTRON	0	23	18	0	41	0	31	0	0	31	18	41	0	31	chr5_32354615
chr5	32354616	32354616	6.8	6.8%_44r	chr5	32354616	GUSBP1	INTRON	0	41	3	0	44	0	30	0	0	30	3	44	0	30	chr5_32354616
chr5	32354804	32354804	7.9	7.9%_101r	chr5	32354804	GUSBP1	INTRON	0	93	8	0	101	0	85	0	0	85	8	101	0	85	chr5_32354804
chr5	32355198	32355198	15.4	15.4%_65r	chr5	32355198	GUSBP1	INTRON	0	55	10	0	65	0	50	0	0	50	10	65	0	50	chr5_32355198
chr5	32355596	32355596	9.4	9.4%_64r	chr5	32355596	GUSBP1	INTRON	0	58	6	0	64	0	50	0	0	50	6	64	0	50	chr5_32355596
chr5	32355690	32355690	8.2	8.2%_49r	chr5	32355690	GUSBP1	INTRON	0	45	4	0	49	0	59	0	0	59	4	49	0	59	chr5_32355690
chr5	32379138	32379138	14.3	14.3%_56r	chr5	32379138	GUSBP1	INTRON	0	48	8	0	56	0	65	0	0	65	8	56	0	65	chr5_32379138
chr5	32390428	32390428	8.7	8.7%_69r	chr5	32390428	GUSBP1	INTRON	0	63	6	0	69	0	70	0	0	70	6	69	0	70	chr5_32390428
chr5	32406948	32406948	9.7	9.7%_62r	chr5	32406948	GUSBP1	INTRON	0	56	6	0	62	0	60	0	0	60	6	62	0	60	chr5_32406948
chr5	33989244	33989244	7.7	7.7%_26r	chr5	33989244	GUSBP1	INTRON	0	23	2	1	26	0	27	0	0	27	2	26	0	27	chr5_33989244
chr5	34908808	34908808	8.6	8.6%_70r	chr5	34908808	GUSBP1	INTRON	0	64	6	0	70	0	44	0	0	44	6	70	0	44	chr5_34908808
chr5	36195177	36195177	8.3	8.3%_24r	chr5	36195177	GUSBP1	INTRON	0	22	2	0	24	0	19	0	0	19	2	24	0	19	chr5_36195177
chr5	37288238	37288238	12.2	12.2%_41r	chr5	37288238	GUSBP1	INTRON	0	36	5	0	41	0	26	0	0	26	5	41	0	26	chr5_37288238
chr5	37288245	37288245	13.2	13.2%_38r	chr5	37288245	GUSBP1	INTRON	0	33	5	0	38	0	24	0	0	24	5	38	0	24	chr5_37288245
chr5	37288442	37288442	6.8	6.8%_59r	chr5	37288442	GUSBP1	INTRON	0	55	4	0	59	0	48	0	0	48	4	59	0	48	chr5_37288442
chr5	37292888	37292888	7.7	7.7%_26r	chr5	37292888	GUSBP1	INTRON	0	24	2	0	26	0	25	0	0	25	2	26	0	25	chr5_37292888
chr5	37303317	37303317	10.5	10.5%_38r	chr5	37303317	GUSBP1	INTRON	0	34	4	0	38	0	33	0	0	33	4	38	0	33	chr5_37303317
chr5	37318081	37318081	6.7	6.7%_45r	chr5	37318081	GUSBP1	INTRON	0	42	3	0	45	0	54	0	0	54	3	45	0	54	chr5_37318081
chr5	37324042	37324042	7.3	7.3%_41r	chr5	37324042	GUSBP1	INTRON	0	38	3	0	41	0	37	0	0	37	3	41	0	37	chr5_37324042
chr5	37330071	37330071	6.4	6.4%_47r	chr5	37330071	GUSBP1	INTRON	0	44	3	0	47	0	50	0	0	50	3	47	0	50	chr5_37330071
chr5	40714704	40714704	13.6	13.6%_22r	chr5	40714704	GUSBP1	INTRON	0	19	3	0	22	0	13	0	0	13	3	22	0	13	chr5_40714704
chr5	40714928	40714928	13.9	13.9%_36r	chr5	40714928	GUSBP1	INTRON	0	31	5	0	36	0	30	0	0	30	5	36	0	30	chr5_40714928
chr5	40715529	40715529	7.7	7.7%_26r	chr5	40715529	GUSBP1	INTRON	0	24	2	0	26	0	16	0	0	16	2	26	0	16	chr5_40715529
chr5	40715743	40715743	6.1	6.1%_33r	chr5	40715743	GUSBP1	INTRON	0	31	2	0	33	0	27	0	0	27	2	33	0	27	chr5_40715743
chr5	40715745	40715745	12.1	12.1%_33r	chr5	40715745	GUSBP1	INTRON	0	29	4	0	33	0	30	0	0	30	4	33	0	30	chr5_40715745
chr5	40715747	40715747	18.8	18.8%_32r	chr5	40715747	GUSBP1	INTRON	0	26	6	0	32	0	30	0	0	30	6	32	0	30	chr5_40715747
chr5	40715748	40715748	12.5	12.5%_32r	chr5	40715748	GUSBP1	INTRON	0	28	4	0	32	0	30	0	0	30	4	32	0	30	chr5_40715748
chr5	40716144	40716144	9.4	9.4%_32r	chr5	40716144	GUSBP1	INTRON	0	29	3	0	32	0	21	0	0	21	3	32	0	21	chr5_40716144
chr5	40716251	40716251	6.2	6.2%_32r	chr5	40716251	GUSBP1	INTRON	0	30	2	0	32	0	23	0	0	23	2	32	0	23	chr5_40716251
chr5	40716445	40716445	6.9	6.9%_29r	chr5	40716445	GUSBP1	INTRON	0	27	2	0	29	0	34	0	0	34	2	29	0	34	chr5_40716445
chr5	40762551	40762551	13.3	13.3%_30r	chr5	40762551	GUSBP1	INTRON	0	26	4	0	30	0	27	0	0	27	4	30	0	27	chr5_40762551
chr5	40765092	40765092	9.7	9.7%_31r	chr5	40765092	GUSBP1	INTRON	0	28	3	0	31	0	38	0	0	38	3	31	0	38	chr5_40765092
chr5	40765177	40765177	10.1	10.1%_79r	chr5	40765177	GUSBP1	INTRON	0	71	8	0	79	0	42	0	0	42	8	79	0	42	chr5_40765177
chr5	40825619	40825619	8.7	8.7%_23r	chr5	40825619	GUSBP1	INTRON	0	21	2	0	23	0	20	0	0	20	2	23	0	20	chr5_40825619
chr5	40825640	40825640	7.7	7.7%_26r	chr5	40825640	GUSBP1	INTRON	0	24	2	0	26	0	19	0	0	19	2	26	0	19	chr5_40825640
chr5	40825650	40825650	10	10.0%_20r	chr5	40825650	GUSBP1	INTRON	0	18	2	0	20	0	18	0	0	18	2	20	0	18	chr5_40825650
chr5	40826439	40826439	13.6	13.6%_22r	chr5	40826439	GUSBP1	INTRON	0	19	3	0	22	0	20	0	0	20	3	22	0	20	chr5_40826439
chr5	40826676	40826676	9.1	9.1%_22r	chr5	40826676	GUSBP1	INTRON	0	20	2	0	22	0	16	0	0	16	2	22	0	16	chr5_40826676
chr5	40826798	40826798	9.1	9.1%_22r	chr5	40826798	GUSBP1	INTRON	0	20	2	0	22	0	14	0	0	14	2	22	0	14	chr5_40826798
chr5	40827066	40827066	20	20.0%_20r	chr5	40827066	GUSBP1	INTRON	0	16	4	0	20	0	12	0	0	12	4	20	0	12	chr5_40827066
chr5	40827122	40827122	8.3	8.3%_24r	chr5	40827122	GUSBP1	INTRON	0	22	2	0	24	0	17	0	0	17	2	24	0	17	chr5_40827122
chr5	40827237	40827237	18.2	18.2%_22r	chr5	40827237	GUSBP1	INTRON	0	18	4	0	22	0	12	0	0	12	4	22	0	12	chr5_40827237
chr5	40827256	40827256	25	25.0%_24r	chr5	40827256	GUSBP1	INTRON	0	18	6	0	24	0	10	0	0	10	6	24	0	10	chr5_40827256
chr5	41730267	41730267	33.3	33.3%_45r	chr5	41730267	GUSBP1	INTRON	0	30	15	0	45	0	34	0	0	34	15	45	0	34	chr5_41730267
chr5	41730561	41730561	20.5	20.5%_39r	chr5	41730561	GUSBP1	INTRON	0	31	8	0	39	0	35	0	0	35	8	39	0	35	chr5_41730561
chr5	41730755	41730755	72.7	72.7%_44r	chr5	41730755	GUSBP1	INTRON	0	12	32	0	44	0	46	0	0	46	32	44	0	46	chr5_41730755
chr5	41730947	41730947	8.7	8.7%_46r	chr5	41730947	GUSBP1	INTRON	0	42	4	0	46	0	38	0	0	38	4	46	0	38	chr5_41730947
chr5	41730950	41730950	6.4	6.4%_47r	chr5	41730950	GUSBP1	INTRON	0	44	3	0	47	0	41	0	0	41	3	47	0	41	chr5_41730950
chr5	41730966	41730966	8.3	8.3%_48r	chr5	41730966	GUSBP1	INTRON	0	44	4	0	48	0	54	0	0	54	4	48	0	54	chr5_41730966
chr5	41731006	41731006	6.8	6.8%_44r	chr5	41731006	GUSBP1	INTRON	0	41	3	0	44	0	34	0	0	34	3	44	0	34	chr5_41731006
chr5	41731416	41731416	32.1	32.1%_28r	chr5	41731416	GUSBP1	INTRON	0	19	9	0	28	0	27	0	0	27	9	28	0	27	chr5_41731416
chr5	41731504	41731504	6.9	6.9%_29r	chr5	41731504	GUSBP1	INTRON	0	27	2	0	29	0	25	0	0	25	2	29	0	25	chr5_41731504
chr5	41731642	41731642	25.6	25.6%_39r	chr5	41731642	GUSBP1	INTRON	0	29	10	0	39	0	45	0	0	45	10	39	0	45	chr5_41731642
chr5	41731734	41731734	7.7	7.7%_26r	chr5	41731734	GUSBP1	INTRON	0	24	2	0	26	0	17	0	0	17	2	26	0	17	chr5_41731734
chr5	41731749	41731749	11.9	11.9%_42r	chr5	41731749	GUSBP1	INTRON	0	37	5	0	42	0	27	0	0	27	5	42	0	27	chr5_41731749
chr5	41749535	41749535	10	10.0%_40r	chr5	41749535	GUSBP1	INTRON	0	36	4	0	40	0	35	0	0	35	4	40	0	35	chr5_41749535
chr5	41749577	41749577	28.9	28.9%_38r	chr5	41749577	GUSBP1	INTRON	0	27	11	0	38	0	46	0	0	46	11	38	0	46	chr5_41749577
chr5	41749603	41749603	6.1	6.1%_33r	chr5	41749603	GUSBP1	INTRON	0	31	2	0	33	0	38	0	0	38	2	33	0	38	chr5_41749603
chr5	43289452	43289452	6.9	6.9%_144r	chr5	43289452	GUSBP1	INTRON	0	134	10	0	144	0	141	0	0	141	10	144	0	141	chr5_43289452
chr5	43289508	43289508	15	15.0%_107r	chr5	43289508	GUSBP1	INTRON	0	91	16	0	107	1	78	0	0	79	16	107	0	79	chr5_43289508
chr5	43289982	43289982	6.1	6.1%_49r	chr5	43289982	GUSBP1	INTRON	0	46	3	0	49	0	36	0	0	36	3	49	0	36	chr5_43289982
chr5	43289986	43289986	10.9	10.9%_46r	chr5	43289986	GUSBP1	INTRON	0	41	5	0	46	0	40	0	0	40	5	46	0	40	chr5_43289986
chr5	43290011	43290011	16.9	16.9%_65r	chr5	43290011	GUSBP1	INTRON	0	54	11	0	65	0	54	0	0	54	11	65	0	54	chr5_43290011
chr5	43298078	43298078	14.7	14.7%_34r	chr5	43298078	GUSBP1	INTRON	0	29	5	0	34	0	39	0	0	39	5	34	0	39	chr5_43298078
chr5	43298777	43298777	8.9	8.9%_45r	chr5	43298777	GUSBP1	INTRON	0	41	4	0	45	1	53	0	0	54	4	45	0	54	chr5_43298777
chr5	43298782	43298782	6.7	6.7%_45r	chr5	43298782	GUSBP1	INTRON	0	42	3	0	45	0	55	0	0	55	3	45	0	55	chr5_43298782
chr5	43534938	43534938	7.1	7.1%_28r	chr5	43534938	GUSBP1	INTRON	0	26	2	0	28	0	28	0	0	28	2	28	0	28	chr5_43534938
chr5	43535609	43535609	8.7	8.7%_23r	chr5	43535609	GUSBP1	INTRON	0	21	2	0	23	0	23	0	0	23	2	23	0	23	chr5_43535609
chr5	50397544	50397544	10	10.0%_30r	chr5	50397544	GUSBP1	INTRON	0	27	3	0	30	0	20	0	0	20	3	30	0	20	chr5_50397544
chr5	50399080	50399080	6.7	6.7%_30r	chr5	50399080	GUSBP1	INTRON	0	28	2	0	30	0	22	0	0	22	2	30	0	22	chr5_50399080
chr5	50403254	50403254	23.3	23.3%_60r	chr5	50403254	GUSBP1	INTRON	0	46	14	0	60	0	54	0	0	54	14	60	0	54	chr5_50403254
chr5	53098195	53098195	11.1	11.1%_36r	chr5	53098195	GUSBP1	INTRON	1	31	4	0	36	0	21	0	0	21	4	36	0	21	chr5_53098195
chr5	53098207	53098207	9.7	9.7%_31r	chr5	53098207	GUSBP1	INTRON	0	28	3	0	31	0	11	0	0	11	3	31	0	11	chr5_53098207
chr5	53098360	53098360	24.7	24.7%_81r	chr5	53098360	GUSBP1	INTRON	0	61	20	0	81	0	65	0	0	65	20	81	0	65	chr5_53098360
chr5	53101405	53101405	12.5	12.5%_184r	chr5	53101405	GUSBP1	INTRON	0	161	23	0	184	0	116	0	0	116	23	184	0	116	chr5_53101405
chr5	53101436	53101436	18.1	18.1%_138r	chr5	53101436	GUSBP1	INTRON	0	113	25	0	138	0	100	0	0	100	25	138	0	100	chr5_53101436
chr5	53885251	53885251	8	8.0%_25r	chr5	53885251	GUSBP1	INTRON	0	23	2	0	25	0	15	0	1	16	2	25	0	16	chr5_53885251
chr5	53885947	53885947	25.8	25.8%_31r	chr5	53885947	GUSBP1	INTRON	0	23	8	0	31	0	19	0	0	19	8	31	0	19	chr5_53885947
chr5	53885956	53885956	7.1	7.1%_28r	chr5	53885956	GUSBP1	INTRON	0	26	2	0	28	0	14	0	0	14	2	28	0	14	chr5_53885956
chr5	55290330	55290330	10.3	10.3%_29r	chr5	55290330	GUSBP1	INTRON	0	26	3	0	29	0	24	0	0	24	3	29	0	24	chr5_55290330
chr5	55425292	55425292	11.5	11.5%_26r	chr5	55425292	GUSBP1	INTRON	0	23	3	0	26	0	33	0	0	33	3	26	0	33	chr5_55425292
chr5	55626225	55626225	15	15.0%_20r	chr5	55626225	GUSBP1	INTRON	0	17	3	0	20	0	22	0	0	22	3	20	0	22	chr5_55626225
chr5	55936718	55936718	6.1	6.1%_33r	chr5	55936718	GUSBP1	INTRON	0	31	2	0	33	0	29	0	0	29	2	33	0	29	chr5_55936718
chr5	55936810	55936810	9.3	9.3%_54r	chr5	55936810	GUSBP1	INTRON	0	49	5	0	54	0	32	0	0	32	5	54	0	32	chr5_55936810
chr5	55936950	55936950	9.3	9.3%_43r	chr5	55936950	GUSBP1	INTRON	0	39	4	0	43	0	29	0	0	29	4	43	0	29	chr5_55936950
chr5	55937008	55937008	18.2	18.2%_22r	chr5	55937008	GUSBP1	INTRON	0	18	4	0	22	0	25	0	0	25	4	22	0	25	chr5_55937008
chr5	55937031	55937031	15.2	15.2%_33r	chr5	55937031	GUSBP1	INTRON	0	28	5	0	33	0	23	0	0	23	5	33	0	23	chr5_55937031
chr5	55937049	55937049	8.6	8.6%_35r	chr5	55937049	GUSBP1	INTRON	0	32	3	0	35	0	18	0	0	18	3	35	0	18	chr5_55937049
chr5	55937088	55937088	20.8	20.8%_24r	chr5	55937088	GUSBP1	INTRON	0	19	5	0	24	0	20	0	0	20	5	24	0	20	chr5_55937088
chr5	55940680	55940680	10	10.0%_20r	chr5	55940680	GUSBP1	INTRON	0	18	2	0	20	0	11	0	0	11	2	20	0	11	chr5_55940680
chr5	55951554	55951554	12	12.0%_25r	chr5	55951554	GUSBP1	INTRON	0	22	3	0	25	0	25	0	0	25	3	25	0	25	chr5_55951554
chr5	55956050	55956050	8.3	8.3%_24r	chr5	55956050	GUSBP1	INTRON	0	22	2	0	24	0	28	0	0	28	2	24	0	28	chr5_55956050
chr5	55960449	55960449	50	50.0%_22r	chr5	55960449	GUSBP1	INTRON	0	11	11	0	22	0	34	0	0	34	11	22	0	34	chr5_55960449
chr5	55960515	55960515	6.1	6.1%_33r	chr5	55960515	GUSBP1	INTRON	0	31	2	0	33	0	31	0	0	31	2	33	0	31	chr5_55960515
chr5	55964219	55964219	13.6	13.6%_22r	chr5	55964219	GUSBP1	INTRON	0	19	3	0	22	0	28	0	0	28	3	22	0	28	chr5_55964219
chr5	56919812	56919812	18.2	18.2%_22r	chr5	56919812	GUSBP1	INTRON	0	18	4	0	22	0	17	0	0	17	4	22	0	17	chr5_56919812
chr5	56920326	56920326	8.3	8.3%_24r	chr5	56920326	GUSBP1	INTRON	0	22	2	0	24	0	31	0	0	31	2	24	0	31	chr5_56920326
chr5	56933343	56933343	12.5	12.5%_24r	chr5	56933343	GUSBP1	INTRON	0	21	3	0	24	0	15	0	0	15	3	24	0	15	chr5_56933343
chr5	56937590	56937590	9.4	9.4%_32r	chr5	56937590	GUSBP1	INTRON	0	29	3	0	32	0	14	0	0	14	3	32	0	14	chr5_56937590
chr5	60597736	60597736	7.9	7.9%_38r	chr5	60597736	GUSBP1	INTRON	0	35	3	0	38	0	42	0	0	42	3	38	0	42	chr5_60597736
chr5	60597885	60597885	10	10.0%_20r	chr5	60597885	GUSBP1	INTRON	0	18	2	0	20	0	23	0	0	23	2	20	0	23	chr5_60597885
chr5	60605778	60605778	6.5	6.5%_31r	chr5	60605778	GUSBP1	INTRON	0	29	2	0	31	0	26	0	0	26	2	31	0	26	chr5_60605778
chr5	60605837	60605837	16.7	16.7%_36r	chr5	60605837	GUSBP1	INTRON	0	30	6	0	36	0	36	0	0	36	6	36	0	36	chr5_60605837
chr5	60645603	60645603	6.7	6.7%_30r	chr5	60645603	GUSBP1	INTRON	0	28	2	0	30	0	24	0	0	24	2	30	0	24	chr5_60645603
chr5	60686982	60686982	11.5	11.5%_26r	chr5	60686982	GUSBP1	INTRON	0	23	3	0	26	0	28	0	0	28	3	26	0	28	chr5_60686982
chr5	60874061	60874061	9.1	9.1%_22r	chr5	60874061	GUSBP1	INTRON	0	20	2	0	22	0	17	0	0	17	2	22	0	17	chr5_60874061
chr5	60890972	60890972	9.5	9.5%_42r	chr5	60890972	GUSBP1	INTRON	0	38	4	0	42	0	44	0	0	44	4	42	0	44	chr5_60890972
chr5	60891020	60891020	7.1	7.1%_28r	chr5	60891020	GUSBP1	INTRON	0	26	2	0	28	0	16	0	0	16	2	28	0	16	chr5_60891020
chr5	60898366	60898366	8.2	8.2%_49r	chr5	60898366	GUSBP1	INTRON	0	45	4	0	49	0	37	0	0	37	4	49	0	37	chr5_60898366
chr5	60903694	60903694	6.8	6.8%_44r	chr5	60903694	GUSBP1	INTRON	0	41	3	0	44	0	27	0	0	27	3	44	0	27	chr5_60903694
chr5	60903708	60903708	11.9	11.9%_42r	chr5	60903708	GUSBP1	INTRON	0	37	5	0	42	0	33	0	0	33	5	42	0	33	chr5_60903708
chr5	60918312	60918312	6.4	6.4%_47r	chr5	60918312	GUSBP1	INTRON	0	44	3	0	47	0	41	0	0	41	3	47	0	41	chr5_60918312
chr5	61158782	61158782	29.1	29.1%_55r	chr5	61158782	GUSBP1	INTRON	0	39	16	0	55	0	46	0	0	46	16	55	0	46	chr5_61158782
chr5	61159782	61159782	6.5	6.5%_77r	chr5	61159782	GUSBP1	INTRON	0	72	5	0	77	0	67	0	0	67	5	77	0	67	chr5_61159782
chr5	62361297	62361297	7.4	7.4%_27r	chr5	62361297	GUSBP1	INTRON	0	25	2	0	27	0	19	0	0	19	2	27	0	19	chr5_62361297
chr5	64718308	64718308	9.1	9.1%_22r	chr5	64718308	GUSBP1	INTRON	0	20	2	0	22	0	20	0	0	20	2	22	0	20	chr5_64718308
chr5	64721143	64721143	9.5	9.5%_21r	chr5	64721143	GUSBP1	INTRON	0	19	2	0	21	0	11	0	0	11	2	21	0	11	chr5_64721143
chr5	64721194	64721194	7.7	7.7%_26r	chr5	64721194	GUSBP1	INTRON	0	24	2	0	26	0	17	0	0	17	2	26	0	17	chr5_64721194
chr5	64724159	64724159	16.7	16.7%_24r	chr5	64724159	GUSBP1	INTRON	0	20	4	0	24	0	11	0	0	11	4	24	0	11	chr5_64724159
chr5	65518135	65518135	6.1	6.1%_66r	chr5	65518135	GUSBP1	INTRON	0	62	4	0	66	0	51	0	0	51	4	66	0	51	chr5_65518135
chr5	65518140	65518140	8.3	8.3%_72r	chr5	65518140	GUSBP1	INTRON	0	66	6	0	72	0	56	0	0	56	6	72	0	56	chr5_65518140
chr5	65518295	65518295	9.8	9.8%_92r	chr5	65518295	GUSBP1	INTRON	0	83	9	0	92	0	64	0	0	64	9	92	0	64	chr5_65518295
chr5	65518360	65518360	26.2	26.2%_65r	chr5	65518360	GUSBP1	INTRON	0	48	17	0	65	0	60	0	0	60	17	65	0	60	chr5_65518360
chr5	65554880	65554880	7.3	7.3%_82r	chr5	65554880	GUSBP1	INTRON	0	76	6	0	82	0	58	0	0	58	6	82	0	58	chr5_65554880
chr5	65554900	65554900	9.8	9.8%_51r	chr5	65554900	GUSBP1	INTRON	0	46	5	0	51	0	48	0	0	48	5	51	0	48	chr5_65554900
chr5	65670155	65670155	8	8.0%_25r	chr5	65670155	GUSBP1	INTRON	0	23	2	0	25	0	25	0	0	25	2	25	0	25	chr5_65670155
chr5	65670327	65670327	10.3	10.3%_29r	chr5	65670327	GUSBP1	INTRON	0	26	3	0	29	0	23	0	0	23	3	29	0	23	chr5_65670327
chr5	65680526	65680526	7.7	7.7%_26r	chr5	65680526	GUSBP1	INTRON	0	24	2	0	26	0	33	0	0	33	2	26	0	33	chr5_65680526
chr5	65704300	65704300	6	6.0%_50r	chr5	65704300	GUSBP1	INTRON	0	47	3	0	50	0	37	0	0	37	3	50	0	37	chr5_65704300
chr5	111501059	111501059	9.5	9.5%_21r	chr5	111501059	STARD4	EXON	0	19	2	0	21	0	22	0	0	22	2	21	0	22	chr5_111501059
chr5	111512430	111512430	20	20.0%_20r	chr5	111512430	STARD4	EXON	0	16	4	0	20	0	14	0	0	14	4	20	0	14	chr5_111512430
chr5	111512452	111512452	15	15.0%_20r	chr5	111512452	STARD4	EXON	0	17	3	0	20	0	14	0	0	14	3	20	0	14	chr5_111512452
chr5	79613018	79613018	9.5	9.5%_42r	chr5	79613018	TENT2	EXON	38	0	0	4	42	39	0	0	0	39	4	42	0	39	chr5_79613018
chr5	79685482	79685482	8	8.0%_25r	chr5	79685482	TENT2	EXON	23	0	0	2	25	12	0	0	0	12	2	25	0	12	chr5_79685482
chr5	79685713	79685713	10.8	10.8%_37r	chr5	79685713	TENT2	EXON	33	0	0	4	37	28	0	0	0	28	4	37	0	28	chr5_79685713
chr5	79685714	79685714	8.1	8.1%_37r	chr5	79685714	TENT2	EXON	34	0	0	3	37	29	0	0	0	29	3	37	0	29	chr5_79685714
chr5	79685800	79685800	83	83.0%_47r	chr5	79685800	TENT2	EXON	7	1	0	39	47	25	0	0	0	25	39	47	0	25	chr5_79685800
chr5	79685867	79685867	28.6	28.6%_42r	chr5	79685867	TENT2	EXON	30	0	0	12	42	39	0	0	0	39	12	42	0	39	chr5_79685867
chr5	140694252	140694252	13	13.0%_23r	chr5	140694252	HARS2	EXON	20	0	0	3	23	13	0	0	0	13	3	23	0	13	chr5_140694252
chr5	140696195	140696195	30	30.0%_20r	chr5	140696195	HARS2	EXON	14	0	0	6	20	18	0	0	0	18	6	20	0	18	chr5_140696195
chr5	140696950	140696950	11.1	11.1%_36r	chr5	140696950	HARS2	EXON	32	0	0	4	36	28	0	0	0	28	4	36	0	28	chr5_140696950
chr5	140696973	140696973	21.4	21.4%_28r	chr5	140696973	HARS2	EXON	22	0	0	6	28	21	0	0	0	21	6	28	0	21	chr5_140696973
chr5	140696994	140696994	7.7	7.7%_39r	chr5	140696994	HARS2	EXON	36	0	0	3	39	21	0	0	0	21	3	39	0	21	chr5_140696994
chr5	140697025	140697025	50	50.0%_22r	chr5	140697025	HARS2	EXON	11	0	0	11	22	18	0	0	0	18	11	22	0	18	chr5_140697025
chr5	140697026	140697026	14.3	14.3%_21r	chr5	140697026	HARS2	EXON	18	0	0	3	21	16	0	0	0	16	3	21	0	16	chr5_140697026
chr5	140697196	140697196	23.9	23.9%_46r	chr5	140697196	HARS2	EXON	35	0	0	11	46	33	0	0	0	33	11	46	0	33	chr5_140697196
chr5	140697244	140697244	25	25.0%_32r	chr5	140697244	HARS2	EXON	24	0	0	8	32	29	0	0	0	29	8	32	0	29	chr5_140697244
chr5	140697330	140697330	12.9	12.9%_31r	chr5	140697330	HARS2	EXON	27	0	0	4	31	21	0	0	0	21	4	31	0	21	chr5_140697330
chr5	140697339	140697339	13.2	13.2%_38r	chr5	140697339	HARS2	EXON	33	0	0	5	38	25	0	0	0	25	5	38	0	25	chr5_140697339
chr5	140697384	140697384	14.6	14.6%_41r	chr5	140697384	HARS2	EXON	34	1	0	6	41	34	0	0	0	34	6	41	0	34	chr5_140697384
chr5	140697617	140697617	6.9	6.9%_29r	chr5	140697617	HARS2	EXON	27	0	0	2	29	28	0	0	0	28	2	29	0	28	chr5_140697617
chr5	140698585	140698585	12.5	12.5%_40r	chr5	140698585	HARS2	EXON	35	0	0	5	40	34	0	0	0	34	5	40	0	34	chr5_140698585
chr5	140698646	140698646	33.3	33.3%_21r	chr5	140698646	HARS2	EXON	14	0	0	7	21	28	0	0	0	28	7	21	0	28	chr5_140698646
chr5	140698654	140698654	13.6	13.6%_22r	chr5	140698654	HARS2	EXON	19	0	0	3	22	26	0	0	0	26	3	22	0	26	chr5_140698654
chr5	140698708	140698708	10.5	10.5%_38r	chr5	140698708	HARS2	EXON	34	0	0	4	38	27	0	0	0	27	4	38	0	27	chr5_140698708
chr5	140698710	140698710	7.9	7.9%_38r	chr5	140698710	HARS2	EXON	35	0	0	3	38	22	0	0	0	22	3	38	0	22	chr5_140698710
chr5	140698730	140698730	16	16.0%_50r	chr5	140698730	HARS2	EXON	42	0	0	8	50	31	0	0	0	31	8	50	0	31	chr5_140698730
chr5	140698856	140698856	26.7	26.7%_30r	chr5	140698856	HARS2	EXON	22	0	0	8	30	24	0	0	0	24	8	30	0	24	chr5_140698856
chr5	140698893	140698893	12.5	12.5%_24r	chr5	140698893	HARS2	EXON	21	0	0	3	24	19	0	0	0	19	3	24	0	19	chr5_140698893
chr5	140699115	140699115	29.4	29.4%_34r	chr5	140699115	HARS2	EXON	24	0	0	10	34	30	0	0	0	30	10	34	0	30	chr5_140699115
chr5	163437701	163437701	8.5	8.5%_59r	chr5	163437701	CCNG1	EXON	54	0	0	5	59	69	0	0	0	69	5	59	0	69	chr5_163437701
chr5	163439345	163439345	8.1	8.1%_160r	chr5	163439345	CCNG1	EXON	146	1	0	13	160	132	0	0	0	132	13	160	0	132	chr5_163439345
chr5	163439409	163439409	6.8	6.8%_235r	chr5	163439409	CCNG1	EXON	219	0	0	16	235	188	0	0	0	188	16	235	0	188	chr5_163439409
chr5	163439437	163439437	10	10.0%_210r	chr5	163439437	CCNG1	EXON	189	0	0	21	210	177	0	0	0	177	21	210	0	177	chr5_163439437
chr5	163441244	163441244	7	7.0%_270r	chr5	163441244	CCNG1	EXON	251	0	0	19	270	254	0	1	0	255	19	270	0	255	chr5_163441244
chr5	163441257	163441257	12.3	12.3%_219r	chr5	163441257	CCNG1	EXON	192	0	0	27	219	204	0	0	0	204	27	219	0	204	chr5_163441257
chr5	163441908	163441908	11.8	11.8%_212r	chr5	163441908	CCNG1	EXON	187	0	0	25	212	191	0	0	0	191	25	212	0	191	chr5_163441908
chr5	163441913	163441913	55.9	55.9%_188r	chr5	163441913	CCNG1	EXON	83	0	0	105	188	174	0	0	0	174	105	188	0	174	chr5_163441913
chr5	163443803	163443803	6.2	6.2%_336r	chr5	163443803	CCNG1	EXON	315	0	0	21	336	265	0	0	0	265	21	336	0	265	chr5_163443803
chr5	163443842	163443842	7	7.0%_273r	chr5	163443842	CCNG1	EXON	254	0	0	19	273	214	0	0	0	214	19	273	0	214	chr5_163443842
chr5	163444669	163444669	12.1	12.1%_280r	chr5	163444669	CCNG1	EXON	246	0	0	34	280	219	0	0	0	219	34	280	0	219	chr5_163444669
chr5	6372012	6372012	7.8	7.8%_64r	chr5	6372012	MED10	EXON	1	58	5	0	64	0	50	0	0	50	5	64	0	50	chr5_6372012
chr5	6372278	6372278	6.1	6.1%_132r	chr5	6372278	MED10	EXON	1	123	8	0	132	0	129	0	0	129	8	132	0	129	chr5_6372278
chr5	6372335	6372335	8.1	8.1%_99r	chr5	6372335	MED10	EXON	0	91	8	0	99	0	87	0	0	87	8	99	0	87	chr5_6372335
chr5	142000772	142000772	6.8	6.8%_44r	chr5	142000772	GNPDA1	EXON	0	41	3	0	44	0	40	0	0	40	3	44	0	40	chr5_142000772
chr5	142000859	142000859	6.5	6.5%_46r	chr5	142000859	GNPDA1	EXON	0	43	3	0	46	0	42	0	0	42	3	46	0	42	chr5_142000859
chr5	142001177	142001177	20	20.0%_50r	chr5	142001177	GNPDA1	EXON	0	40	10	0	50	0	50	0	0	50	10	50	0	50	chr5_142001177
chr5	142001497	142001497	8.1	8.1%_37r	chr5	142001497	GNPDA1	EXON	0	34	3	0	37	0	24	0	0	24	3	37	0	24	chr5_142001497
chr5	142001509	142001509	7.5	7.5%_40r	chr5	142001509	GNPDA1	EXON	0	37	3	0	40	0	35	0	0	35	3	40	0	35	chr5_142001509
chr5	142001862	142001862	13.9	13.9%_101r	chr5	142001862	GNPDA1	EXON	0	87	14	0	101	0	115	0	0	115	14	101	0	115	chr5_142001862
chr5	142003135	142003135	11.1	11.1%_90r	chr5	142003135	GNPDA1	EXON	0	80	10	0	90	0	111	0	1	112	10	90	0	112	chr5_142003135
chr5	132559366	132559366	9.3	9.3%_75r	chr5	132559366	RAD50	EXON	68	0	0	7	75	80	0	0	0	80	7	75	0	80	chr5_132559366
chr5	132579438	132579438	6.5	6.5%_62r	chr5	132579438	RAD50	EXON	58	0	0	4	62	60	0	0	0	60	4	62	0	60	chr5_132579438
chr5	132579877	132579877	7.1	7.1%_70r	chr5	132579877	RAD50	EXON	65	0	0	5	70	61	0	0	0	61	5	70	0	61	chr5_132579877
chr5	132588047	132588047	10.2	10.2%_59r	chr5	132588047	RAD50	EXON	53	0	0	6	59	45	1	0	0	46	6	59	0	46	chr5_132588047
chr5	132603469	132603469	7.7	7.7%_39r	chr5	132603469	RAD50	EXON	36	0	0	3	39	38	0	0	0	38	3	39	0	38	chr5_132603469
chr5	82273734	82273734	9.7	9.7%_31r	chr5	82273734	RPS23	EXON	0	28	3	0	31	0	14	0	0	14	3	31	0	14	chr5_82273734
chr5	82273736	82273736	6.2	6.2%_32r	chr5	82273736	RPS23	EXON	0	30	2	0	32	0	13	0	0	13	2	32	0	13	chr5_82273736
chr5	82274031	82274031	8	8.0%_25r	chr5	82274031	RPS23	EXON	0	23	2	0	25	0	12	0	0	12	2	25	0	12	chr5_82274031
chr5	82274263	82274263	59.1	59.1%_22r	chr5	82274263	RPS23	EXON	0	9	13	0	22	0	13	0	0	13	13	22	0	13	chr5_82274263
chr5	82274278	82274278	13	13.0%_23r	chr5	82274278	RPS23	EXON	0	20	3	0	23	0	11	0	0	11	3	23	0	11	chr5_82274278
chr5	82274381	82274381	33.3	33.3%_21r	chr5	82274381	RPS23	EXON	0	14	7	0	21	0	11	0	0	11	7	21	0	11	chr5_82274381
chr5	82274391	82274391	8.3	8.3%_24r	chr5	82274391	RPS23	EXON	0	22	2	0	24	0	14	0	0	14	2	24	0	14	chr5_82274391
chr5	82274408	82274408	12	12.0%_25r	chr5	82274408	RPS23	EXON	0	22	3	0	25	0	11	0	0	11	3	25	0	11	chr5_82274408
chr5	82275108	82275108	47.6	47.6%_21r	chr5	82275108	RPS23	EXON	0	11	10	0	21	0	17	0	0	17	10	21	0	17	chr5_82275108
chr5	82275143	82275143	8.3	8.3%_24r	chr5	82275143	RPS23	EXON	0	22	2	0	24	0	19	0	0	19	2	24	0	19	chr5_82275143
chr5	82275157	82275157	63.6	63.6%_33r	chr5	82275157	RPS23	EXON	0	12	21	0	33	0	24	0	0	24	21	33	0	24	chr5_82275157
chr5	82275172	82275172	23.1	23.1%_26r	chr5	82275172	RPS23	EXON	0	20	6	0	26	0	22	0	0	22	6	26	0	22	chr5_82275172
chr5	82275211	82275211	8.7	8.7%_23r	chr5	82275211	RPS23	EXON	0	21	2	0	23	0	22	0	0	22	2	23	0	22	chr5_82275211
chr5	82275241	82275241	6.9	6.9%_29r	chr5	82275241	RPS23	EXON	0	27	2	0	29	0	19	0	0	19	2	29	0	19	chr5_82275241
chr5	82275288	82275288	6.5	6.5%_31r	chr5	82275288	RPS23	EXON	0	29	2	0	31	0	28	0	0	28	2	31	0	28	chr5_82275288
chr5	82275295	82275295	13.3	13.3%_30r	chr5	82275295	RPS23	EXON	0	26	4	0	30	0	27	0	0	27	4	30	0	27	chr5_82275295
chr5	82275308	82275308	11.1	11.1%_27r	chr5	82275308	RPS23	EXON	0	24	3	0	27	0	23	0	0	23	3	27	0	23	chr5_82275308
chr5	82275310	82275310	7.4	7.4%_27r	chr5	82275310	RPS23	EXON	0	25	2	0	27	0	22	0	0	22	2	27	0	22	chr5_82275310
chr5	82275343	82275343	19.4	19.4%_31r	chr5	82275343	RPS23	EXON	0	25	6	0	31	0	19	0	0	19	6	31	0	19	chr5_82275343
chr5	82275379	82275379	7.7	7.7%_39r	chr5	82275379	RPS23	EXON	0	36	3	0	39	0	20	0	0	20	3	39	0	20	chr5_82275379
chr5	82275487	82275487	14.3	14.3%_21r	chr5	82275487	RPS23	EXON	0	18	3	0	21	0	12	0	0	12	3	21	0	12	chr5_82275487
chr5	82275497	82275497	28.6	28.6%_21r	chr5	82275497	RPS23	EXON	0	15	6	0	21	0	18	0	0	18	6	21	0	18	chr5_82275497
chr5	82275530	82275530	13.8	13.8%_29r	chr5	82275530	RPS23	EXON	0	25	4	0	29	0	20	0	0	20	4	29	0	20	chr5_82275530
chr5	82275538	82275538	26.5	26.5%_34r	chr5	82275538	RPS23	EXON	0	25	9	0	34	0	23	0	0	23	9	34	0	23	chr5_82275538
chr5	82275633	82275633	14.3	14.3%_35r	chr5	82275633	RPS23	EXON	0	30	5	0	35	0	20	0	0	20	5	35	0	20	chr5_82275633
chr5	82275681	82275681	52	52.0%_25r	chr5	82275681	RPS23	EXON	0	12	13	0	25	0	14	0	0	14	13	25	0	14	chr5_82275681
chr5	82275937	82275937	8.3	8.3%_36r	chr5	82275937	RPS23	EXON	0	33	3	0	36	0	29	0	0	29	3	36	0	29	chr5_82275937
chr5	82275942	82275942	13.8	13.8%_29r	chr5	82275942	RPS23	EXON	0	25	4	0	29	0	23	0	0	23	4	29	0	23	chr5_82275942
chr5	123545532	123545532	6.9	6.9%_29r	chr5	123545532	CSNK1G3	EXON	27	0	0	2	29	26	0	0	0	26	2	29	0	26	chr5_123545532
chr5	123545737	123545737	19.2	19.2%_26r	chr5	123545737	CSNK1G3	EXON	20	0	1	5	26	20	0	0	0	20	5	26	0	20	chr5_123545737
chr5	123573443	123573443	24.3	24.3%_37r	chr5	123573443	CSNK1G3	EXON	28	0	0	9	37	31	0	0	0	31	9	37	0	31	chr5_123573443
chr5	123575918	123575918	14	14.0%_43r	chr5	123575918	CSNK1G3	EXON	37	0	0	6	43	34	0	0	0	34	6	43	0	34	chr5_123575918
chr5	123614603	123614603	19	19.0%_21r	chr5	123614603	CSNK1G3	EXON	17	0	0	4	21	17	0	0	0	17	4	21	0	17	chr5_123614603
chr5	123614996	123614996	8.1	8.1%_37r	chr5	123614996	CSNK1G3	EXON	34	0	0	3	37	47	0	0	0	47	3	37	0	47	chr5_123614996
chr5	123614998	123614998	12.2	12.2%_41r	chr5	123614998	CSNK1G3	EXON	36	0	0	5	41	50	0	0	0	50	5	41	0	50	chr5_123614998
chr5	123615114	123615114	20.7	20.7%_29r	chr5	123615114	CSNK1G3	EXON	23	0	0	6	29	28	0	0	0	28	6	29	0	28	chr5_123615114
chr5	123615154	123615154	11.4	11.4%_35r	chr5	123615154	CSNK1G3	EXON	31	0	0	4	35	26	0	0	0	26	4	35	0	26	chr5_123615154
chr5	31551361	31551361	15.6	15.6%_64r	chr5	31551361	C5orf22	EXON	54	0	0	10	64	59	0	0	0	59	10	64	0	59	chr5_31551361
chr5	31552842	31552842	31	31.0%_58r	chr5	31552842	C5orf22	EXON	40	0	0	18	58	43	0	0	0	43	18	58	0	43	chr5_31552842
chr5	31554191	31554191	8	8.0%_25r	chr5	31554191	C5orf22	EXON	23	0	0	2	25	15	0	0	0	15	2	25	0	15	chr5_31554191
chr5	31554426	31554426	6.2	6.2%_32r	chr5	31554426	C5orf22	EXON	30	0	0	2	32	25	0	0	0	25	2	32	0	25	chr5_31554426
chr5	31554505	31554505	8.1	8.1%_37r	chr5	31554505	C5orf22	EXON	34	0	0	3	37	40	0	0	0	40	3	37	0	40	chr5_31554505
chr5	31554513	31554513	10.9	10.9%_46r	chr5	31554513	C5orf22	EXON	41	0	0	5	46	49	0	0	0	49	5	46	0	49	chr5_31554513
chr5	31554522	31554522	10.7	10.7%_28r	chr5	31554522	C5orf22	EXON	25	0	0	3	28	19	0	0	0	19	3	28	0	19	chr5_31554522
chr5	31554661	31554661	7.3	7.3%_41r	chr5	31554661	C5orf22	EXON	37	1	0	3	41	32	0	0	0	32	3	41	0	32	chr5_31554661
chr5	132867183	132867183	20	20.0%_35r	chr5	132867183	UQCRQ	INTRON	28	0	0	7	35	50	0	0	0	50	7	35	0	50	chr5_132867183
chr5	132867184	132867184	11.4	11.4%_35r	chr5	132867184	UQCRQ	INTRON	31	0	0	4	35	50	0	0	0	50	4	35	0	50	chr5_132867184
chr5	132867286	132867286	9.7	9.7%_31r	chr5	132867286	UQCRQ	INTRON	28	0	0	3	31	24	0	0	0	24	3	31	0	24	chr5_132867286
chr5	73569614	73569614	6.5	6.5%_31r	chr5	73569614	UTP15	EXON	29	0	0	2	31	38	0	0	0	38	2	31	0	38	chr5_73569614
chr5	73579938	73579938	17.2	17.2%_29r	chr5	73579938	UTP15	EXON	24	0	0	5	29	29	0	0	0	29	5	29	0	29	chr5_73579938
chr5	73580023	73580023	12.5	12.5%_24r	chr5	73580023	UTP15	EXON	21	0	0	3	24	22	0	0	0	22	3	24	0	22	chr5_73580023
chr5	73580027	73580027	7.7	7.7%_26r	chr5	73580027	UTP15	EXON	24	0	0	2	26	18	0	0	0	18	2	26	0	18	chr5_73580027
chr5	73580031	73580031	11.1	11.1%_27r	chr5	73580031	UTP15	EXON	24	0	0	3	27	20	0	0	0	20	3	27	0	20	chr5_73580031
chr5	134604270	134604270	16.2	16.2%_37r	chr5	134604270	SAR1B	EXON	0	31	6	0	37	0	26	0	0	26	6	37	0	26	chr5_134604270
chr5	134604675	134604675	6.7	6.7%_30r	chr5	134604675	SAR1B	EXON	0	28	2	0	30	0	15	0	0	15	2	30	0	15	chr5_134604675
chr5	134604701	134604701	7.4	7.4%_27r	chr5	134604701	SAR1B	EXON	0	25	2	0	27	0	12	0	0	12	2	27	0	12	chr5_134604701
chr5	134604980	134604980	8.3	8.3%_24r	chr5	134604980	SAR1B	EXON	0	22	2	0	24	0	10	0	0	10	2	24	0	10	chr5_134604980
chr5	134605892	134605892	12.9	12.9%_31r	chr5	134605892	SAR1B	EXON	0	27	4	0	31	0	35	0	0	35	4	31	0	35	chr5_134605892
chr5	134606093	134606093	7.1	7.1%_28r	chr5	134606093	SAR1B	EXON	0	26	2	0	28	0	26	0	0	26	2	28	0	26	chr5_134606093
chr5	134606494	134606494	25.7	25.7%_74r	chr5	134606494	SAR1B	EXON	0	55	19	0	74	0	51	0	0	51	19	74	0	51	chr5_134606494
chr5	134608385	134608385	23.3	23.3%_159r	chr5	134608385	SAR1B	EXON	0	122	37	0	159	0	157	0	0	157	37	159	0	157	chr5_134608385
chr5	134609642	134609642	10.6	10.6%_188r	chr5	134609642	SAR1B	EXON	0	168	20	0	188	0	165	0	0	165	20	188	0	165	chr5_134609642
chr5	134612721	134612721	6.6	6.6%_122r	chr5	134612721	SAR1B	EXON	0	114	8	0	122	0	109	0	0	109	8	122	0	109	chr5_134612721
chr5	150698506	150698506	27.7	27.7%_65r	chr5	150698506	RBM22	EXON	0	47	18	0	65	0	75	0	0	75	18	65	0	75	chr5_150698506
chr5	74770777	74770777	11.5	11.5%_182r	chr5	74770777	NSA2	EXON	158	0	3	21	182	130	0	2	0	132	21	182	0	132	chr5_74770777
chr5	74773997	74773997	9.1	9.1%_253r	chr5	74773997	NSA2	EXON	230	0	0	23	253	159	0	0	0	159	23	253	0	159	chr5_74773997
chr5	146120422	146120422	9.1	9.1%_77r	chr5	146120422	LARS1	EXON	0	70	7	0	77	0	55	0	0	55	7	77	0	55	chr5_146120422
chr5	146135626	146135626	20.6	20.6%_63r	chr5	146135626	LARS1	EXON	0	50	13	0	63	0	45	0	0	45	13	63	0	45	chr5_146135626
chr5	146143022	146143022	12.5	12.5%_80r	chr5	146143022	LARS1	EXON	0	70	10	0	80	0	57	0	0	57	10	80	0	57	chr5_146143022
chr5	146144502	146144502	20.3	20.3%_69r	chr5	146144502	LARS1	EXON	0	55	14	0	69	0	52	0	0	52	14	69	0	52	chr5_146144502
chr5	146144674	146144674	12.7	12.7%_55r	chr5	146144674	LARS1	EXON	0	48	7	0	55	0	75	0	0	75	7	55	0	75	chr5_146144674
chr5	146144675	146144675	21.4	21.4%_56r	chr5	146144675	LARS1	EXON	0	44	12	0	56	0	74	0	0	74	12	56	0	74	chr5_146144675
chr5	146144697	146144697	56.5	56.5%_62r	chr5	146144697	LARS1	EXON	0	27	35	0	62	0	79	0	0	79	35	62	0	79	chr5_146144697
chr5	146153213	146153213	9.5	9.5%_74r	chr5	146153213	LARS1	EXON	0	67	7	0	74	0	59	0	0	59	7	74	0	59	chr5_146153213
chr5	146157563	146157563	6.6	6.6%_76r	chr5	146157563	LARS1	EXON	0	71	5	0	76	0	56	0	0	56	5	76	0	56	chr5_146157563
chr5	146157729	146157729	7.6	7.6%_66r	chr5	146157729	LARS1	EXON	0	61	5	0	66	0	67	0	0	67	5	66	0	67	chr5_146157729
chr5	146160411	146160411	8.1	8.1%_74r	chr5	146160411	LARS1	EXON	0	68	6	0	74	1	55	0	0	56	6	74	0	56	chr5_146160411
chr5	146160443	146160443	11.4	11.4%_79r	chr5	146160443	LARS1	EXON	0	70	9	0	79	0	81	0	0	81	9	79	0	81	chr5_146160443
chr5	146164311	146164311	6	6.0%_83r	chr5	146164311	LARS1	EXON	0	78	5	0	83	0	71	0	0	71	5	83	0	71	chr5_146164311
chr5	146164335	146164335	16.3	16.3%_49r	chr5	146164335	LARS1	EXON	1	40	8	0	49	0	68	0	0	68	8	49	0	68	chr5_146164335
chr5	146164441	146164441	25.3	25.3%_91r	chr5	146164441	LARS1	EXON	0	68	23	0	91	0	85	0	0	85	23	91	0	85	chr5_146164441
chr5	146168242	146168242	18	18.0%_111r	chr5	146168242	LARS1	EXON	0	91	20	0	111	0	101	0	0	101	20	111	0	101	chr5_146168242
chr5	146168244	146168244	9.1	9.1%_110r	chr5	146168244	LARS1	EXON	0	100	10	0	110	0	100	0	1	101	10	110	0	101	chr5_146168244
chr5	146168252	146168252	12.9	12.9%_124r	chr5	146168252	LARS1	EXON	0	108	16	0	124	0	94	0	0	94	16	124	0	94	chr5_146168252
chr5	146177555	146177555	14.1	14.1%_128r	chr5	146177555	LARS1	EXON	0	110	18	0	128	0	122	0	0	122	18	128	0	122	chr5_146177555
chr5	146177657	146177657	15	15.0%_80r	chr5	146177657	LARS1	EXON	0	67	12	1	80	0	59	0	0	59	12	80	0	59	chr5_146177657
chr5	146182543	146182543	18.3	18.3%_104r	chr5	146182543	LARS1	EXON	0	83	19	2	104	0	97	0	0	97	19	104	0	97	chr5_146182543
chr5	60597736	60597736	7.9	7.9%_38r	chr5	60597736	DEPDC1B	EXON	0	35	3	0	38	0	42	0	0	42	3	38	0	42	chr5_60597736
chr5	60597885	60597885	10	10.0%_20r	chr5	60597885	DEPDC1B	EXON	0	18	2	0	20	0	23	0	0	23	2	20	0	23	chr5_60597885
chr5	60605778	60605778	6.5	6.5%_31r	chr5	60605778	DEPDC1B	EXON	0	29	2	0	31	0	26	0	0	26	2	31	0	26	chr5_60605778
chr5	60605837	60605837	16.7	16.7%_36r	chr5	60605837	DEPDC1B	EXON	0	30	6	0	36	0	36	0	0	36	6	36	0	36	chr5_60605837
chr5	60645603	60645603	6.7	6.7%_30r	chr5	60645603	DEPDC1B	EXON	0	28	2	0	30	0	24	0	0	24	2	30	0	24	chr5_60645603
chr5	60686982	60686982	11.5	11.5%_26r	chr5	60686982	DEPDC1B	EXON	0	23	3	0	26	0	28	0	0	28	3	26	0	28	chr5_60686982
chr5	53885251	53885251	8	8.0%_25r	chr5	53885251	ARL15	EXON	0	23	2	0	25	0	15	0	1	16	2	25	0	16	chr5_53885251
chr5	53885947	53885947	25.8	25.8%_31r	chr5	53885947	ARL15	EXON	0	23	8	0	31	0	19	0	0	19	8	31	0	19	chr5_53885947
chr5	53885956	53885956	7.1	7.1%_28r	chr5	53885956	ARL15	EXON	0	26	2	0	28	0	14	0	0	14	2	28	0	14	chr5_53885956
chr5	41912152	41912152	13.5	13.5%_52r	chr5	41912152	C5orf51	EXON	45	0	0	7	52	52	0	0	0	52	7	52	0	52	chr5_41912152
chr5	41917154	41917154	8.9	8.9%_56r	chr5	41917154	C5orf51	EXON	51	0	0	5	56	74	0	0	0	74	5	56	0	74	chr5_41917154
chr5	41917298	41917298	25.9	25.9%_27r	chr5	41917298	C5orf51	EXON	20	0	0	7	27	27	0	0	0	27	7	27	0	27	chr5_41917298
chr5	41917506	41917506	27.3	27.3%_22r	chr5	41917506	C5orf51	EXON	16	0	0	6	22	29	0	0	0	29	6	22	0	29	chr5_41917506
chr5	41917697	41917697	7.7	7.7%_26r	chr5	41917697	C5orf51	EXON	24	0	0	2	26	13	0	0	0	13	2	26	0	13	chr5_41917697
chr5	41917965	41917965	9.1	9.1%_22r	chr5	41917965	C5orf51	EXON	20	0	0	2	22	19	0	0	0	19	2	22	0	19	chr5_41917965
chr5	41917985	41917985	8	8.0%_25r	chr5	41917985	C5orf51	EXON	23	0	0	2	25	26	0	0	0	26	2	25	0	26	chr5_41917985
chr5	41918651	41918651	17.5	17.5%_40r	chr5	41918651	C5orf51	EXON	33	0	0	7	40	29	0	0	0	29	7	40	0	29	chr5_41918651
chr5	41918653	41918653	8.3	8.3%_36r	chr5	41918653	C5orf51	EXON	32	1	0	3	36	22	0	0	0	22	3	36	0	22	chr5_41918653
chr5	41918661	41918661	6.5	6.5%_46r	chr5	41918661	C5orf51	EXON	43	0	0	3	46	29	0	0	0	29	3	46	0	29	chr5_41918661
chr5	41919298	41919298	39.6	39.6%_48r	chr5	41919298	C5orf51	EXON	29	0	0	19	48	40	0	0	0	40	19	48	0	40	chr5_41919298
chr5	41921476	41921476	36.4	36.4%_22r	chr5	41921476	C5orf51	EXON	14	0	0	8	22	23	0	0	0	23	8	22	0	23	chr5_41921476
chr5	32601720	32601720	9.6	9.6%_166r	chr5	32601720	SUB1	EXON	150	0	0	16	166	130	0	0	0	130	16	166	0	130	chr5_32601720
chr5	32601738	32601738	6.7	6.7%_149r	chr5	32601738	SUB1	EXON	139	0	0	10	149	99	0	0	0	99	10	149	0	99	chr5_32601738
chr5	32601799	32601799	16.4	16.4%_146r	chr5	32601799	SUB1	EXON	122	0	0	24	146	97	0	0	0	97	24	146	0	97	chr5_32601799
chr5	32601888	32601888	8.8	8.8%_136r	chr5	32601888	SUB1	EXON	124	0	0	12	136	103	0	0	0	103	12	136	0	103	chr5_32601888
chr5	32602037	32602037	7.6	7.6%_66r	chr5	32602037	SUB1	EXON	61	0	0	5	66	58	0	0	0	58	5	66	0	58	chr5_32602037
chr5	32602057	32602057	7	7.0%_57r	chr5	32602057	SUB1	EXON	53	0	0	4	57	46	0	0	0	46	4	57	0	46	chr5_32602057
chr5	32602264	32602264	9.1	9.1%_33r	chr5	32602264	SUB1	EXON	30	0	0	3	33	22	0	0	0	22	3	33	0	22	chr5_32602264
chr5	32602941	32602941	7.4	7.4%_27r	chr5	32602941	SUB1	EXON	25	0	0	2	27	34	0	0	0	34	2	27	0	34	chr5_32602941
chr5	32603101	32603101	9.5	9.5%_42r	chr5	32603101	SUB1	EXON	38	0	0	4	42	36	0	0	0	36	4	42	0	36	chr5_32603101
chr5	32603155	32603155	9.1	9.1%_33r	chr5	32603155	SUB1	EXON	30	0	0	3	33	43	0	0	0	43	3	33	0	43	chr5_32603155
chr5	32603156	32603156	6.5	6.5%_31r	chr5	32603156	SUB1	EXON	29	0	0	2	31	43	0	0	0	43	2	31	0	43	chr5_32603156
chr5	32603168	32603168	7.7	7.7%_39r	chr5	32603168	SUB1	EXON	36	0	0	3	39	41	0	0	0	41	3	39	0	41	chr5_32603168
chr5	32603271	32603271	8	8.0%_25r	chr5	32603271	SUB1	EXON	23	0	0	2	25	25	0	0	0	25	2	25	0	25	chr5_32603271
chr5	32603430	32603430	7.7	7.7%_39r	chr5	32603430	SUB1	EXON	36	0	0	3	39	50	0	0	0	50	3	39	0	50	chr5_32603430
chr5	32603920	32603920	21.7	21.7%_23r	chr5	32603920	SUB1	EXON	18	0	0	5	23	20	0	0	0	20	5	23	0	20	chr5_32603920
chr5	32603924	32603924	12	12.0%_25r	chr5	32603924	SUB1	EXON	22	0	0	3	25	26	0	0	0	26	3	25	0	26	chr5_32603924
chr5	32603925	32603925	8	8.0%_25r	chr5	32603925	SUB1	EXON	23	0	0	2	25	26	0	0	0	26	2	25	0	26	chr5_32603925
chr5	32603926	32603926	9.1	9.1%_33r	chr5	32603926	SUB1	EXON	30	0	0	3	33	29	0	0	0	29	3	33	0	29	chr5_32603926
chr5	32603952	32603952	7.7	7.7%_39r	chr5	32603952	SUB1	EXON	36	0	0	3	39	32	0	0	0	32	3	39	0	32	chr5_32603952
chr5	32603970	32603970	15	15.0%_40r	chr5	32603970	SUB1	EXON	34	0	0	6	40	36	0	0	0	36	6	40	0	36	chr5_32603970
chr5	178231117	178231117	9.1	9.1%_22r	chr5	178231117	LOC100128340	INTRON	0	20	2	0	22	0	33	0	0	33	2	22	0	33	chr5_178231117
chr5	178612507	178612507	8.9	8.9%_45r	chr5	178612507	LOC100128340	INTRON	0	41	4	0	45	0	49	0	0	49	4	45	0	49	chr5_178612507
chr5	178612817	178612817	6.1	6.1%_33r	chr5	178612817	LOC100128340	INTRON	0	31	2	0	33	0	46	0	0	46	2	33	0	46	chr5_178612817
chr5	178613734	178613734	8.6	8.6%_70r	chr5	178613734	LOC100128340	INTRON	0	64	6	0	70	0	75	0	0	75	6	70	0	75	chr5_178613734
chr5	178613736	178613736	24.3	24.3%_70r	chr5	178613736	LOC100128340	INTRON	0	53	17	0	70	0	79	0	0	79	17	70	0	79	chr5_178613736
chr5	6662955	6662955	8.3	8.3%_24r	chr5	6662955	SRD5A1	EXON	22	0	0	2	24	17	0	0	0	17	2	24	0	17	chr5_6662955
chr5	6668668	6668668	50	50.0%_26r	chr5	6668668	SRD5A1	EXON	13	0	0	13	26	10	0	0	0	10	13	26	0	10	chr5_6668668
chr5	6669111	6669111	11.5	11.5%_26r	chr5	6669111	SRD5A1	EXON	23	0	0	3	26	16	0	0	0	16	3	26	0	16	chr5_6669111
chr5	178209349	178209349	6.4	6.4%_157r	chr5	178209349	HNRNPAB	EXON	147	0	0	10	157	145	0	2	0	147	10	157	0	147	chr5_178209349
chr5	178210168	178210168	21	21.0%_81r	chr5	178210168	HNRNPAB	EXON	64	0	0	17	81	83	0	0	0	83	17	81	0	83	chr5_178210168
chr5	178210174	178210174	11.6	11.6%_86r	chr5	178210174	HNRNPAB	EXON	76	0	0	10	86	88	0	0	0	88	10	86	0	88	chr5_178210174
chr5	178210195	178210195	6.5	6.5%_77r	chr5	178210195	HNRNPAB	EXON	72	0	0	5	77	74	0	0	0	74	5	77	0	74	chr5_178210195
chr5	178210876	178210876	7.9	7.9%_140r	chr5	178210876	HNRNPAB	EXON	129	0	0	11	140	98	0	0	0	98	11	140	0	98	chr5_178210876
chr5	7873455	7873455	33.3	33.3%_21r	chr5	7873455	MTRR	EXON	14	0	0	7	21	18	0	0	0	18	7	21	0	18	chr5_7873455
chr5	7878208	7878208	16.7	16.7%_24r	chr5	7878208	MTRR	EXON	20	0	0	4	24	31	0	0	0	31	4	24	0	31	chr5_7878208
chr5	7900419	7900419	27.3	27.3%_33r	chr5	7900419	MTRR	EXON	24	0	0	9	33	21	0	0	0	21	9	33	0	21	chr5_7900419
chr5	7900437	7900437	8.3	8.3%_24r	chr5	7900437	MTRR	EXON	22	0	0	2	24	29	0	0	0	29	2	24	0	29	chr5_7900437
chr5	470761	470761	11.1	11.1%_27r	chr5	470761	PP7080	EXON	1	23	3	0	27	0	19	0	0	19	3	27	0	19	chr5_470761
chr5	176346565	176346565	6.6	6.6%_106r	chr5	176346565	KIAA1191	EXON	0	99	7	0	106	0	93	0	0	93	7	106	0	93	chr5_176346565
chr5	176346991	176346991	28	28.0%_150r	chr5	176346991	KIAA1191	EXON	0	108	42	0	150	0	90	0	0	90	42	150	0	90	chr5_176346991
chr5	179699070	179699070	11.5	11.5%_26r	chr5	179699070	CANX	EXON	23	0	0	3	26	27	0	1	0	28	3	26	0	28	chr5_179699070
chr5	179699099	179699099	6.4	6.4%_47r	chr5	179699099	CANX	EXON	44	0	0	3	47	47	0	0	0	47	3	47	0	47	chr5_179699099
chr5	179705687	179705687	34.4	34.4%_32r	chr5	179705687	CANX	EXON	21	0	0	11	32	41	0	0	0	41	11	32	0	41	chr5_179705687
chr5	179705692	179705692	12	12.0%_25r	chr5	179705692	CANX	EXON	22	0	0	3	25	29	0	0	0	29	3	25	0	29	chr5_179705692
chr5	97177778	97177778	8.5	8.5%_47r	chr5	97177778	RIOK2	EXON	0	43	4	0	47	0	51	0	0	51	4	47	0	51	chr5_97177778
chr5	97177783	97177783	11.8	11.8%_51r	chr5	97177783	RIOK2	EXON	0	45	6	0	51	0	51	0	0	51	6	51	0	51	chr5_97177783
chr5	97177842	97177842	17.2	17.2%_58r	chr5	97177842	RIOK2	EXON	0	48	10	0	58	0	66	0	0	66	10	58	0	66	chr5_97177842
chr5	97179166	97179166	16.7	16.7%_24r	chr5	97179166	RIOK2	EXON	0	20	4	0	24	0	30	0	0	30	4	24	0	30	chr5_97179166
chr5	76832884	76832884	6.9	6.9%_29r	chr5	76832884	F2RL1	EXON	27	0	0	2	29	33	0	0	0	33	2	29	0	33	chr5_76832884
chr5	76833835	76833835	28.6	28.6%_28r	chr5	76833835	F2RL1	EXON	20	0	0	8	28	43	0	0	0	43	8	28	0	43	chr5_76833835
chr5	76833937	76833937	15	15.0%_20r	chr5	76833937	F2RL1	EXON	17	0	0	3	20	19	0	0	0	19	3	20	0	19	chr5_76833937
chr5	138191884	138191884	6.8	6.8%_44r	chr5	138191884	CDC23	EXON	0	40	3	1	44	0	37	0	0	37	3	44	0	37	chr5_138191884
chr5	138201375	138201375	14.3	14.3%_35r	chr5	138201375	CDC23	EXON	0	30	5	0	35	0	42	0	0	42	5	35	0	42	chr5_138201375
chr5	138201410	138201410	6.7	6.7%_30r	chr5	138201410	CDC23	EXON	0	28	2	0	30	0	54	0	0	54	2	30	0	54	chr5_138201410
chr5	138555097	138555097	7.1	7.1%_28r	chr5	138555097	HSPA9	EXON	0	26	2	0	28	0	31	0	0	31	2	28	0	31	chr5_138555097
chr5	138555234	138555234	9.9	9.9%_71r	chr5	138555234	HSPA9	EXON	0	64	7	0	71	0	58	0	0	58	7	71	0	58	chr5_138555234
chr5	138555244	138555244	9.8	9.8%_61r	chr5	138555244	HSPA9	EXON	0	55	6	0	61	0	48	0	0	48	6	61	0	48	chr5_138555244
chr5	138555267	138555267	8.6	8.6%_58r	chr5	138555267	HSPA9	EXON	0	53	5	0	58	0	45	0	0	45	5	58	0	45	chr5_138555267
chr5	138555484	138555484	13.6	13.6%_265r	chr5	138555484	HSPA9	EXON	2	227	36	0	265	1	258	0	0	259	36	265	0	259	chr5_138555484
chr5	138556097	138556097	12.1	12.1%_214r	chr5	138556097	HSPA9	EXON	0	188	26	0	214	0	230	0	0	230	26	214	0	230	chr5_138556097
chr5	138556786	138556786	6.4	6.4%_265r	chr5	138556786	HSPA9	EXON	0	248	17	0	265	0	288	0	0	288	17	265	0	288	chr5_138556786
chr5	138557899	138557899	15.4	15.4%_356r	chr5	138557899	HSPA9	EXON	0	301	55	0	356	0	379	0	0	379	55	356	0	379	chr5_138557899
chr5	138558648	138558648	11.1	11.1%_343r	chr5	138558648	HSPA9	EXON	0	305	38	0	343	0	353	0	0	353	38	343	0	353	chr5_138558648
chr5	138559911	138559911	10.4	10.4%_432r	chr5	138559911	HSPA9	EXON	0	387	45	0	432	0	427	1	0	428	45	432	1	428	chr5_138559911
chr5	138559929	138559929	16.7	16.7%_438r	chr5	138559929	HSPA9	EXON	3	361	73	1	438	1	451	0	0	452	73	438	0	452	chr5_138559929
chr5	138559953	138559953	6.8	6.8%_369r	chr5	138559953	HSPA9	EXON	1	343	25	0	369	0	380	0	0	380	25	369	0	380	chr5_138559953
chr5	138560048	138560048	8.8	8.8%_318r	chr5	138560048	HSPA9	EXON	0	289	28	1	318	2	332	0	1	335	28	318	0	335	chr5_138560048
chr5	138561659	138561659	6.2	6.2%_276r	chr5	138561659	HSPA9	EXON	0	258	17	1	276	1	308	0	0	309	17	276	0	309	chr5_138561659
chr5	138561770	138561770	9.3	9.3%_322r	chr5	138561770	HSPA9	EXON	0	292	30	0	322	0	376	0	0	376	30	322	0	376	chr5_138561770
chr5	138567017	138567017	12.2	12.2%_401r	chr5	138567017	HSPA9	EXON	0	352	49	0	401	0	429	1	0	430	49	401	1	430	chr5_138567017
chr5	138571008	138571008	6	6.0%_316r	chr5	138571008	HSPA9	EXON	0	296	19	1	316	0	359	0	1	360	19	316	0	360	chr5_138571008
chr5	138571088	138571088	10	10.0%_279r	chr5	138571088	HSPA9	EXON	0	250	28	1	279	0	252	0	0	252	28	279	0	252	chr5_138571088
chr5	141318820	141318820	13	13.0%_108r	chr5	141318820	TAF7	EXON	0	94	14	0	108	0	68	0	0	68	14	108	0	68	chr5_141318820
chr5	141320361	141320361	20.2	20.2%_99r	chr5	141320361	TAF7	EXON	0	79	20	0	99	0	98	0	0	98	20	99	0	98	chr5_141320361
chr5	139623454	139623454	53.6	53.6%_110r	chr5	139623454	UBE2D2	EXON	51	0	0	59	110	153	0	0	0	153	59	110	0	153	chr5_139623454
chr5	139623460	139623460	39	39.0%_118r	chr5	139623460	UBE2D2	EXON	72	0	0	46	118	148	1	0	0	149	46	118	0	149	chr5_139623460
chr5	139626998	139626998	21.8	21.8%_78r	chr5	139626998	UBE2D2	EXON	61	0	0	17	78	70	0	0	0	70	17	78	0	70	chr5_139626998
chr5	139627106	139627106	32.8	32.8%_61r	chr5	139627106	UBE2D2	EXON	41	0	0	20	61	70	0	0	0	70	20	61	0	70	chr5_139627106
chr5	139627241	139627241	9.8	9.8%_61r	chr5	139627241	UBE2D2	EXON	55	0	0	6	61	64	0	0	0	64	6	61	0	64	chr5_139627241
chr5	139627309	139627309	8.7	8.7%_69r	chr5	139627309	UBE2D2	EXON	63	0	0	6	69	71	0	0	0	71	6	69	0	71	chr5_139627309
chr5	139627311	139627311	9.9	9.9%_71r	chr5	139627311	UBE2D2	EXON	64	0	0	7	71	69	0	0	0	69	7	71	0	69	chr5_139627311
chr5	139627335	139627335	9.9	9.9%_71r	chr5	139627335	UBE2D2	EXON	64	0	0	7	71	77	0	1	0	78	7	71	0	78	chr5_139627335
chr5	139627341	139627341	29.6	29.6%_81r	chr5	139627341	UBE2D2	EXON	57	0	0	24	81	95	0	0	0	95	24	81	0	95	chr5_139627341
chr5	139627347	139627347	8.3	8.3%_84r	chr5	139627347	UBE2D2	EXON	77	0	0	7	84	90	0	0	0	90	7	84	0	90	chr5_139627347
chr5	139627377	139627377	14.7	14.7%_68r	chr5	139627377	UBE2D2	EXON	58	0	0	10	68	92	0	0	0	92	10	68	0	92	chr5_139627377
chr5	139627380	139627380	17.4	17.4%_69r	chr5	139627380	UBE2D2	EXON	57	0	0	12	69	81	0	0	0	81	12	69	0	81	chr5_139627380
chr5	139627518	139627518	8.1	8.1%_62r	chr5	139627518	UBE2D2	EXON	57	0	0	5	62	44	0	0	0	44	5	62	0	44	chr5_139627518
chr5	139627550	139627550	30	30.0%_50r	chr5	139627550	UBE2D2	EXON	35	0	0	15	50	45	0	0	0	45	15	50	0	45	chr5_139627550
chr5	134402494	134402494	19.2	19.2%_78r	chr5	134402494	CDKN2AIPNL	EXON	1	61	15	1	78	0	70	0	0	70	15	78	0	70	chr5_134402494
chr5	75685456	75685456	9.5	9.5%_21r	chr5	75685456	POC5	EXON	0	19	2	0	21	0	28	0	0	28	2	21	0	28	chr5_75685456
chr5	75690467	75690467	8.3	8.3%_36r	chr5	75690467	POC5	EXON	0	33	3	0	36	0	33	0	0	33	3	36	0	33	chr5_75690467
chr5	75694789	75694789	7.7	7.7%_26r	chr5	75694789	POC5	EXON	0	24	2	0	26	0	27	0	0	27	2	26	0	27	chr5_75694789
chr5	160401906	160401906	30	30.0%_20r	chr5	160401906	SLU7	EXON	0	14	6	0	20	0	20	0	0	20	6	20	0	20	chr5_160401906
chr5	160402486	160402486	35	35.0%_20r	chr5	160402486	SLU7	EXON	0	13	7	0	20	0	22	0	0	22	7	20	0	22	chr5_160402486
chr5	160408054	160408054	29.5	29.5%_88r	chr5	160408054	SLU7	EXON	0	62	26	0	88	0	76	0	0	76	26	88	0	76	chr5_160408054
chr5	160415285	160415285	6.6	6.6%_61r	chr5	160415285	SLU7	EXON	0	57	4	0	61	0	38	0	0	38	4	61	0	38	chr5_160415285
chr5	107378144	107378144	12.5	12.5%_24r	chr5	107378144	EFNA5	EXON	0	21	3	0	24	0	16	0	0	16	3	24	0	16	chr5_107378144
chr5	107378358	107378358	8.3	8.3%_24r	chr5	107378358	EFNA5	EXON	0	22	2	0	24	0	41	0	0	41	2	24	0	41	chr5_107378358
chr5	107378551	107378551	6.5	6.5%_31r	chr5	107378551	EFNA5	EXON	0	29	2	0	31	0	27	0	0	27	2	31	0	27	chr5_107378551
chr5	107378635	107378635	16.7	16.7%_48r	chr5	107378635	EFNA5	EXON	0	40	8	0	48	0	68	0	0	68	8	48	0	68	chr5_107378635
chr5	107379380	107379380	6.9	6.9%_29r	chr5	107379380	EFNA5	EXON	0	27	2	0	29	0	32	0	0	32	2	29	0	32	chr5_107379380
chr5	107379980	107379980	15	15.0%_20r	chr5	107379980	EFNA5	EXON	0	17	3	0	20	0	23	0	0	23	3	20	0	23	chr5_107379980
chr5	107380119	107380119	9.5	9.5%_21r	chr5	107380119	EFNA5	EXON	0	19	2	0	21	0	19	0	0	19	2	21	0	19	chr5_107380119
chr5	107380299	107380299	6.2	6.2%_32r	chr5	107380299	EFNA5	EXON	0	30	2	0	32	0	21	0	0	21	2	32	0	21	chr5_107380299
chr5	119452618	119452618	9.1	9.1%_33r	chr5	119452618	HSD17B4	EXON	30	0	0	3	33	29	0	1	0	30	3	33	0	30	chr5_119452618
chr5	119456325	119456325	8.2	8.2%_49r	chr5	119456325	HSD17B4	EXON	45	0	0	4	49	58	0	1	0	59	4	49	0	59	chr5_119456325
chr5	119473933	119473933	8.8	8.8%_68r	chr5	119473933	HSD17B4	EXON	62	0	0	6	68	54	0	0	0	54	6	68	0	54	chr5_119473933
chr5	119473964	119473964	32.8	32.8%_67r	chr5	119473964	HSD17B4	EXON	45	0	0	22	67	69	0	0	0	69	22	67	0	69	chr5_119473964
chr5	119477421	119477421	20.7	20.7%_92r	chr5	119477421	HSD17B4	EXON	73	0	0	19	92	116	0	0	0	116	19	92	0	116	chr5_119477421
chr5	119477422	119477422	6.5	6.5%_92r	chr5	119477422	HSD17B4	EXON	86	0	0	6	92	114	0	0	0	114	6	92	0	114	chr5_119477422
chr5	119477426	119477426	7.7	7.7%_78r	chr5	119477426	HSD17B4	EXON	72	0	0	6	78	102	0	0	0	102	6	78	0	102	chr5_119477426
chr5	119477454	119477454	9.8	9.8%_92r	chr5	119477454	HSD17B4	EXON	83	0	0	9	92	90	0	0	0	90	9	92	0	90	chr5_119477454
chr5	119478951	119478951	10.1	10.1%_69r	chr5	119478951	HSD17B4	EXON	62	0	0	7	69	78	0	0	0	78	7	69	0	78	chr5_119478951
chr5	119478968	119478968	9.5	9.5%_105r	chr5	119478968	HSD17B4	EXON	95	0	0	10	105	86	0	0	0	86	10	105	0	86	chr5_119478968
chr5	119478982	119478982	10.3	10.3%_97r	chr5	119478982	HSD17B4	EXON	87	0	0	10	97	74	0	0	0	74	10	97	0	74	chr5_119478982
chr5	119479006	119479006	10.3	10.3%_87r	chr5	119479006	HSD17B4	EXON	78	0	0	9	87	75	1	0	0	76	9	87	0	76	chr5_119479006
chr5	119479020	119479020	7.7	7.7%_65r	chr5	119479020	HSD17B4	EXON	60	0	0	5	65	77	0	0	0	77	5	65	0	77	chr5_119479020
chr5	119493945	119493945	21.8	21.8%_55r	chr5	119493945	HSD17B4	EXON	43	0	0	12	55	72	0	0	0	72	12	55	0	72	chr5_119493945
chr5	119496544	119496544	55.8	55.8%_52r	chr5	119496544	HSD17B4	EXON	23	0	0	29	52	72	0	0	0	72	29	52	0	72	chr5_119496544
chr5	119496548	119496548	10.9	10.9%_55r	chr5	119496548	HSD17B4	EXON	49	0	0	6	55	73	0	0	0	73	6	55	0	73	chr5_119496548
chr5	119499337	119499337	7.3	7.3%_96r	chr5	119499337	HSD17B4	EXON	89	0	0	7	96	102	0	0	0	102	7	96	0	102	chr5_119499337
chr5	119499419	119499419	11	11.0%_82r	chr5	119499419	HSD17B4	EXON	73	0	0	9	82	82	0	0	0	82	9	82	0	82	chr5_119499419
chr5	119499420	119499420	6.1	6.1%_82r	chr5	119499420	HSD17B4	EXON	77	0	0	5	82	82	0	0	0	82	5	82	0	82	chr5_119499420
chr5	119499470	119499470	6.2	6.2%_80r	chr5	119499470	HSD17B4	EXON	75	0	0	5	80	75	0	0	0	75	5	80	0	75	chr5_119499470
chr5	119499487	119499487	21.2	21.2%_80r	chr5	119499487	HSD17B4	EXON	63	0	0	17	80	76	0	0	0	76	17	80	0	76	chr5_119499487
chr5	119499523	119499523	31.4	31.4%_86r	chr5	119499523	HSD17B4	EXON	59	0	0	27	86	81	0	0	0	81	27	86	0	81	chr5_119499523
chr5	119502057	119502057	25	25.0%_116r	chr5	119502057	HSD17B4	EXON	87	0	0	29	116	133	0	0	0	133	29	116	0	133	chr5_119502057
chr5	119502079	119502079	8.6	8.6%_105r	chr5	119502079	HSD17B4	EXON	96	0	0	9	105	96	0	0	0	96	9	105	0	96	chr5_119502079
chr5	119506837	119506837	7.9	7.9%_101r	chr5	119506837	HSD17B4	EXON	93	0	0	8	101	95	0	0	0	95	8	101	0	95	chr5_119506837
chr5	119506855	119506855	12	12.0%_117r	chr5	119506855	HSD17B4	EXON	103	0	0	14	117	119	0	0	0	119	14	117	0	119	chr5_119506855
chr5	119509159	119509159	31.9	31.9%_94r	chr5	119509159	HSD17B4	EXON	64	0	0	30	94	83	0	0	0	83	30	94	0	83	chr5_119509159
chr5	119509238	119509238	14.9	14.9%_87r	chr5	119509238	HSD17B4	EXON	74	0	0	13	87	64	0	0	0	64	13	87	0	64	chr5_119509238
chr5	119525936	119525936	15.3	15.3%_157r	chr5	119525936	HSD17B4	EXON	133	0	0	24	157	159	0	0	0	159	24	157	0	159	chr5_119525936
chr5	119525990	119525990	7.8	7.8%_77r	chr5	119525990	HSD17B4	EXON	71	0	0	6	77	84	0	0	0	84	6	77	0	84	chr5_119525990
chr5	119527171	119527171	30.9	30.9%_68r	chr5	119527171	HSD17B4	EXON	47	0	0	21	68	87	0	0	0	87	21	68	0	87	chr5_119527171
chr5	119529971	119529971	13.7	13.7%_102r	chr5	119529971	HSD17B4	EXON	87	1	0	14	102	102	0	0	0	102	14	102	0	102	chr5_119529971
chr5	119536488	119536488	18.3	18.3%_93r	chr5	119536488	HSD17B4	EXON	76	0	0	17	93	80	0	0	0	80	17	93	0	80	chr5_119536488
chr5	119536549	119536549	8.2	8.2%_61r	chr5	119536549	HSD17B4	EXON	56	0	0	5	61	68	0	0	0	68	5	61	0	68	chr5_119536549
chr5	160428622	160428622	43.2	43.2%_280r	chr5	160428622	PTTG1	EXON	159	0	0	121	280	244	1	1	0	246	121	280	0	246	chr5_160428622
chr5	138947142	138947142	13.3	13.3%_30r	chr5	138947142	SIL1	EXON	0	26	4	0	30	0	29	0	0	29	4	30	0	29	chr5_138947142
chr5	138947181	138947181	6.1	6.1%_33r	chr5	138947181	SIL1	EXON	0	31	2	0	33	0	28	0	0	28	2	33	0	28	chr5_138947181
chr5	41730267	41730267	33.3	33.3%_45r	chr5	41730267	OXCT1	EXON	0	30	15	0	45	0	34	0	0	34	15	45	0	34	chr5_41730267
chr5	41730561	41730561	20.5	20.5%_39r	chr5	41730561	OXCT1	EXON	0	31	8	0	39	0	35	0	0	35	8	39	0	35	chr5_41730561
chr5	41730755	41730755	72.7	72.7%_44r	chr5	41730755	OXCT1	EXON	0	12	32	0	44	0	46	0	0	46	32	44	0	46	chr5_41730755
chr5	41730947	41730947	8.7	8.7%_46r	chr5	41730947	OXCT1	EXON	0	42	4	0	46	0	38	0	0	38	4	46	0	38	chr5_41730947
chr5	41730950	41730950	6.4	6.4%_47r	chr5	41730950	OXCT1	EXON	0	44	3	0	47	0	41	0	0	41	3	47	0	41	chr5_41730950
chr5	41730966	41730966	8.3	8.3%_48r	chr5	41730966	OXCT1	EXON	0	44	4	0	48	0	54	0	0	54	4	48	0	54	chr5_41730966
chr5	41731006	41731006	6.8	6.8%_44r	chr5	41731006	OXCT1	EXON	0	41	3	0	44	0	34	0	0	34	3	44	0	34	chr5_41731006
chr5	41731416	41731416	32.1	32.1%_28r	chr5	41731416	OXCT1	EXON	0	19	9	0	28	0	27	0	0	27	9	28	0	27	chr5_41731416
chr5	41731504	41731504	6.9	6.9%_29r	chr5	41731504	OXCT1	EXON	0	27	2	0	29	0	25	0	0	25	2	29	0	25	chr5_41731504
chr5	41731642	41731642	25.6	25.6%_39r	chr5	41731642	OXCT1	EXON	0	29	10	0	39	0	45	0	0	45	10	39	0	45	chr5_41731642
chr5	41731734	41731734	7.7	7.7%_26r	chr5	41731734	OXCT1	EXON	0	24	2	0	26	0	17	0	0	17	2	26	0	17	chr5_41731734
chr5	41731749	41731749	11.9	11.9%_42r	chr5	41731749	OXCT1	EXON	0	37	5	0	42	0	27	0	0	27	5	42	0	27	chr5_41731749
chr5	41749535	41749535	10	10.0%_40r	chr5	41749535	OXCT1	EXON	0	36	4	0	40	0	35	0	0	35	4	40	0	35	chr5_41749535
chr5	41749577	41749577	28.9	28.9%_38r	chr5	41749577	OXCT1	EXON	0	27	11	0	38	0	46	0	0	46	11	38	0	46	chr5_41749577
chr5	41749603	41749603	6.1	6.1%_33r	chr5	41749603	OXCT1	EXON	0	31	2	0	33	0	38	0	0	38	2	33	0	38	chr5_41749603
chr5	115211091	115211091	7.4	7.4%_27r	chr5	115211091	PGGT1B	EXON	0	25	2	0	27	0	18	0	0	18	2	27	0	18	chr5_115211091
chr5	115211121	115211121	8	8.0%_25r	chr5	115211121	PGGT1B	EXON	0	23	2	0	25	0	23	0	0	23	2	25	0	23	chr5_115211121
chr5	95591405	95591405	8	8.0%_25r	chr5	95591405	ARSK	EXON	23	0	0	2	25	11	0	0	0	11	2	25	0	11	chr5_95591405
chr5	142131869	142131869	6.1	6.1%_99r	chr5	142131869	NDFIP1	EXON	93	0	0	6	99	103	0	0	0	103	6	99	0	103	chr5_142131869
chr5	142151783	142151783	23.2	23.2%_138r	chr5	142151783	NDFIP1	EXON	105	0	1	32	138	116	0	1	0	117	32	138	0	117	chr5_142151783
chr5	142152155	142152155	6.8	6.8%_59r	chr5	142152155	NDFIP1	EXON	55	0	0	4	59	58	0	1	0	59	4	59	0	59	chr5_142152155
chr5	142152156	142152156	6.8	6.8%_59r	chr5	142152156	NDFIP1	EXON	54	1	0	4	59	59	0	0	0	59	4	59	0	59	chr5_142152156
chr5	142152157	142152157	15.5	15.5%_58r	chr5	142152157	NDFIP1	EXON	49	0	0	9	58	58	0	0	0	58	9	58	0	58	chr5_142152157
chr5	142152211	142152211	12.5	12.5%_48r	chr5	142152211	NDFIP1	EXON	42	0	0	6	48	39	0	0	0	39	6	48	0	39	chr5_142152211
chr5	142152576	142152576	12.8	12.8%_39r	chr5	142152576	NDFIP1	EXON	34	0	0	5	39	23	0	0	0	23	5	39	0	23	chr5_142152576
chr5	142152646	142152646	25.5	25.5%_47r	chr5	142152646	NDFIP1	EXON	35	0	0	12	47	19	0	0	0	19	12	47	0	19	chr5_142152646
chr5	142153697	142153697	7.1	7.1%_28r	chr5	142153697	NDFIP1	EXON	26	0	0	2	28	17	0	1	0	18	2	28	0	18	chr5_142153697
chr5	142153784	142153784	6.1	6.1%_33r	chr5	142153784	NDFIP1	EXON	31	0	0	2	33	15	0	0	0	15	2	33	0	15	chr5_142153784
chr5	142154026	142154026	10	10.0%_20r	chr5	142154026	NDFIP1	EXON	18	0	0	2	20	21	0	0	0	21	2	20	0	21	chr5_142154026
chr5	180608175	180608175	25.6	25.6%_43r	chr5	180608175	FLT4	EXON	0	32	11	0	43	0	44	0	0	44	11	43	0	44	chr5_180608175
chr5	134196750	134196750	6.9	6.9%_29r	chr5	134196750	PPP2CA	EXON	0	27	2	0	29	0	11	0	0	11	2	29	0	11	chr5_134196750
chr5	134196753	134196753	6.9	6.9%_29r	chr5	134196753	PPP2CA	EXON	0	27	2	0	29	0	13	0	0	13	2	29	0	13	chr5_134196753
chr5	134197507	134197507	11.9	11.9%_193r	chr5	134197507	PPP2CA	EXON	0	170	23	0	193	0	205	0	0	205	23	193	0	205	chr5_134197507
chr5	134201041	134201041	7.6	7.6%_370r	chr5	134201041	PPP2CA	EXON	0	342	28	0	370	0	427	0	0	427	28	370	0	427	chr5_134201041
chr5	134201895	134201895	6.6	6.6%_137r	chr5	134201895	PPP2CA	EXON	0	128	9	0	137	1	122	0	0	123	9	137	0	123	chr5_134201895
chr5	134206051	134206051	13.6	13.6%_169r	chr5	134206051	PPP2CA	EXON	0	146	23	0	169	0	165	0	0	165	23	169	0	165	chr5_134206051
chr5	134225782	134225782	13.2	13.2%_121r	chr5	134225782	PPP2CA	EXON	0	105	16	0	121	0	98	0	0	98	16	121	0	98	chr5_134225782
chr5	134225964	134225964	10.3	10.3%_58r	chr5	134225964	PPP2CA	EXON	0	52	6	0	58	0	67	0	0	67	6	58	0	67	chr5_134225964
chr5	131641904	131641904	18.2	18.2%_22r	chr5	131641904	FNIP1	EXON	0	18	4	0	22	0	14	0	0	14	4	22	0	14	chr5_131641904
chr5	131642238	131642238	8.7	8.7%_23r	chr5	131642238	FNIP1	EXON	0	21	2	0	23	0	21	0	0	21	2	23	0	21	chr5_131642238
chr5	131642252	131642252	6.5	6.5%_31r	chr5	131642252	FNIP1	EXON	0	29	2	0	31	0	19	0	0	19	2	31	0	19	chr5_131642252
chr5	77432401	77432401	10.7	10.7%_28r	chr5	77432401	WDR41	EXON	0	25	3	0	28	0	24	0	0	24	3	28	0	24	chr5_77432401
chr5	77432436	77432436	6.9	6.9%_29r	chr5	77432436	WDR41	EXON	0	27	2	0	29	0	26	0	0	26	2	29	0	26	chr5_77432436
chr5	77432438	77432438	6.9	6.9%_29r	chr5	77432438	WDR41	EXON	0	27	2	0	29	0	26	0	0	26	2	29	0	26	chr5_77432438
chr5	77432674	77432674	16.1	16.1%_31r	chr5	77432674	WDR41	EXON	0	26	5	0	31	0	35	0	1	36	5	31	0	36	chr5_77432674
chr5	77432675	77432675	6.5	6.5%_31r	chr5	77432675	WDR41	EXON	0	29	2	0	31	0	35	0	0	35	2	31	0	35	chr5_77432675
chr5	77432938	77432938	12.5	12.5%_48r	chr5	77432938	WDR41	EXON	0	42	6	0	48	0	35	0	0	35	6	48	0	35	chr5_77432938
chr5	77436296	77436296	11.7	11.7%_77r	chr5	77436296	WDR41	EXON	0	68	9	0	77	0	75	0	0	75	9	77	0	75	chr5_77436296
chr5	77436317	77436317	10.3	10.3%_68r	chr5	77436317	WDR41	EXON	1	60	7	0	68	0	61	0	0	61	7	68	0	61	chr5_77436317
chr5	77437391	77437391	41.8	41.8%_55r	chr5	77437391	WDR41	EXON	0	32	23	0	55	0	75	0	0	75	23	55	0	75	chr5_77437391
chr5	77438261	77438261	12	12.0%_75r	chr5	77438261	WDR41	EXON	0	66	9	0	75	0	94	0	0	94	9	75	0	94	chr5_77438261
chr5	77438281	77438281	20	20.0%_70r	chr5	77438281	WDR41	EXON	0	56	14	0	70	0	58	0	1	59	14	70	0	59	chr5_77438281
chr5	77440900	77440900	6.2	6.2%_64r	chr5	77440900	WDR41	EXON	0	60	4	0	64	0	71	0	0	71	4	64	0	71	chr5_77440900
chr5	77449854	77449854	50	50.0%_56r	chr5	77449854	WDR41	EXON	0	28	28	0	56	0	64	0	0	64	28	56	0	64	chr5_77449854
chr5	77451326	77451326	9.3	9.3%_75r	chr5	77451326	WDR41	EXON	0	68	7	0	75	0	72	0	0	72	7	75	0	72	chr5_77451326
chr5	77453831	77453831	11.1	11.1%_72r	chr5	77453831	WDR41	EXON	0	63	8	1	72	0	85	0	0	85	8	72	0	85	chr5_77453831
chr5	77453879	77453879	9.4	9.4%_64r	chr5	77453879	WDR41	EXON	0	58	6	0	64	0	64	0	0	64	6	64	0	64	chr5_77453879
chr5	77453905	77453905	83	83.0%_53r	chr5	77453905	WDR41	EXON	0	9	44	0	53	0	74	0	0	74	44	53	0	74	chr5_77453905
chr5	77459075	77459075	11.9	11.9%_67r	chr5	77459075	WDR41	EXON	0	59	8	0	67	0	86	0	0	86	8	67	0	86	chr5_77459075
chr5	77463103	77463103	6.9	6.9%_58r	chr5	77463103	WDR41	EXON	0	54	4	0	58	0	54	0	0	54	4	58	0	54	chr5_77463103
chr5	77489513	77489513	10.3	10.3%_39r	chr5	77489513	WDR41	EXON	0	35	4	0	39	0	46	0	0	46	4	39	0	46	chr5_77489513
chr5	77489526	77489526	9.1	9.1%_44r	chr5	77489526	WDR41	EXON	0	40	4	0	44	0	42	0	0	42	4	44	0	42	chr5_77489526
chr5	36975813	36975813	8.8	8.8%_34r	chr5	36975813	NIPBL	EXON	31	0	0	3	34	38	0	0	0	38	3	34	0	38	chr5_36975813
chr5	72848392	72848392	6.4	6.4%_47r	chr5	72848392	TNPO1	EXON	44	0	0	3	47	56	0	0	0	56	3	47	0	56	chr5_72848392
chr5	72848435	72848435	9.5	9.5%_42r	chr5	72848435	TNPO1	EXON	38	0	0	4	42	35	0	0	0	35	4	42	0	35	chr5_72848435
chr5	72855911	72855911	15.2	15.2%_99r	chr5	72855911	TNPO1	EXON	83	0	1	15	99	112	0	0	0	112	15	99	0	112	chr5_72855911
chr5	72865646	72865646	9	9.0%_111r	chr5	72865646	TNPO1	EXON	101	0	0	10	111	112	0	0	0	112	10	111	0	112	chr5_72865646
chr5	72875629	72875629	14.8	14.8%_108r	chr5	72875629	TNPO1	EXON	92	0	0	16	108	105	0	0	0	105	16	108	0	105	chr5_72875629
chr5	72877236	72877236	6	6.0%_182r	chr5	72877236	TNPO1	EXON	170	0	1	11	182	158	0	0	0	158	11	182	0	158	chr5_72877236
chr5	72877248	72877248	7.6	7.6%_118r	chr5	72877248	TNPO1	EXON	108	1	0	9	118	106	0	0	0	106	9	118	0	106	chr5_72877248
chr5	72883075	72883075	26.1	26.1%_115r	chr5	72883075	TNPO1	EXON	83	1	1	30	115	118	0	0	0	118	30	115	0	118	chr5_72883075
chr5	72883078	72883078	31.1	31.1%_103r	chr5	72883078	TNPO1	EXON	71	0	0	32	103	117	0	1	0	118	32	103	0	118	chr5_72883078
chr5	72883159	72883159	19.2	19.2%_78r	chr5	72883159	TNPO1	EXON	63	0	0	15	78	91	0	0	0	91	15	78	0	91	chr5_72883159
chr5	72883177	72883177	7.7	7.7%_65r	chr5	72883177	TNPO1	EXON	60	0	0	5	65	73	0	0	0	73	5	65	0	73	chr5_72883177
chr5	72887106	72887106	15.3	15.3%_72r	chr5	72887106	TNPO1	EXON	61	0	0	11	72	94	0	0	0	94	11	72	0	94	chr5_72887106
chr5	72888087	72888087	7.7	7.7%_104r	chr5	72888087	TNPO1	EXON	96	0	0	8	104	109	0	0	0	109	8	104	0	109	chr5_72888087
chr5	72888276	72888276	13.2	13.2%_91r	chr5	72888276	TNPO1	EXON	79	0	0	12	91	92	0	0	0	92	12	91	0	92	chr5_72888276
chr5	72893224	72893224	6.2	6.2%_129r	chr5	72893224	TNPO1	EXON	121	0	0	8	129	150	0	1	0	151	8	129	0	151	chr5_72893224
chr5	72909043	72909043	10	10.0%_20r	chr5	72909043	TNPO1	EXON	18	0	0	2	20	24	0	0	0	24	2	20	0	24	chr5_72909043
chr5	72913655	72913655	12.5	12.5%_32r	chr5	72913655	TNPO1	EXON	28	0	0	4	32	23	0	0	0	23	4	32	0	23	chr5_72913655
chr5	72913947	72913947	26.1	26.1%_23r	chr5	72913947	TNPO1	EXON	17	0	0	6	23	25	0	0	0	25	6	23	0	25	chr5_72913947
chr5	72914033	72914033	17.6	17.6%_34r	chr5	72914033	TNPO1	EXON	28	0	0	6	34	27	0	0	0	27	6	34	0	27	chr5_72914033
chr5	72914313	72914313	20.8	20.8%_24r	chr5	72914313	TNPO1	EXON	19	0	0	5	24	22	0	0	0	22	5	24	0	22	chr5_72914313
chr5	168554261	168554261	8.7	8.7%_23r	chr5	168554261	PANK3	EXON	0	21	2	0	23	0	23	0	0	23	2	23	0	23	chr5_168554261
chr5	168555932	168555932	8.7	8.7%_23r	chr5	168555932	PANK3	EXON	0	21	2	0	23	0	21	0	0	21	2	23	0	21	chr5_168555932
chr5	168556831	168556831	8.3	8.3%_24r	chr5	168556831	PANK3	EXON	0	22	2	0	24	0	19	0	0	19	2	24	0	19	chr5_168556831
chr5	168557079	168557079	8.3	8.3%_24r	chr5	168557079	PANK3	EXON	0	22	2	0	24	0	16	0	0	16	2	24	0	16	chr5_168557079
chr5	168561443	168561443	15	15.0%_20r	chr5	168561443	PANK3	EXON	0	17	3	0	20	0	22	0	0	22	3	20	0	22	chr5_168561443
chr5	138783241	138783241	15.2	15.2%_33r	chr5	138783241	CTNNA1	EXON	28	0	0	5	33	22	0	0	0	22	5	33	0	22	chr5_138783241
chr5	138824572	138824572	12.7	12.7%_79r	chr5	138824572	CTNNA1	EXON	69	0	0	10	79	64	1	0	0	65	10	79	0	65	chr5_138824572
chr5	138827661	138827661	8.8	8.8%_68r	chr5	138827661	CTNNA1	EXON	61	1	0	6	68	60	0	0	0	60	6	68	0	60	chr5_138827661
chr5	138887546	138887546	10	10.0%_30r	chr5	138887546	CTNNA1	EXON	27	0	0	3	30	32	0	0	0	32	3	30	0	32	chr5_138887546
chr5	138887564	138887564	11.4	11.4%_35r	chr5	138887564	CTNNA1	EXON	31	0	0	4	35	34	0	0	0	34	4	35	0	34	chr5_138887564
chr5	138924586	138924586	26.1	26.1%_69r	chr5	138924586	CTNNA1	EXON	51	0	0	18	69	67	0	0	0	67	18	69	0	67	chr5_138924586
chr5	138924610	138924610	7.9	7.9%_63r	chr5	138924610	CTNNA1	EXON	58	0	0	5	63	63	0	1	0	64	5	63	0	64	chr5_138924610
chr5	138925319	138925319	12.5	12.5%_88r	chr5	138925319	CTNNA1	EXON	75	0	2	11	88	93	0	2	0	95	11	88	0	95	chr5_138925319
chr5	138929316	138929316	9.3	9.3%_54r	chr5	138929316	CTNNA1	EXON	49	0	0	5	54	60	0	0	0	60	5	54	0	60	chr5_138929316
chr5	138933860	138933860	7.3	7.3%_123r	chr5	138933860	CTNNA1	EXON	114	0	0	9	123	101	0	0	0	101	9	123	0	101	chr5_138933860
chr5	33989244	33989244	7.7	7.7%_26r	chr5	33989244	AMACR	EXON	0	23	2	1	26	0	27	0	0	27	2	26	0	27	chr5_33989244
chr5	150708789	150708789	6.7	6.7%_45r	chr5	150708789	DCTN4	EXON	0	42	3	0	45	0	30	0	0	30	3	45	0	30	chr5_150708789
chr5	150708966	150708966	6.2	6.2%_32r	chr5	150708966	DCTN4	EXON	0	30	2	0	32	0	15	0	0	15	2	32	0	15	chr5_150708966
chr5	150710058	150710058	6.2	6.2%_32r	chr5	150710058	DCTN4	EXON	0	30	2	0	32	0	23	0	0	23	2	32	0	23	chr5_150710058
chr5	150710060	150710060	11.8	11.8%_34r	chr5	150710060	DCTN4	EXON	0	30	4	0	34	0	22	0	0	22	4	34	0	22	chr5_150710060
chr5	150711121	150711121	6.8	6.8%_74r	chr5	150711121	DCTN4	EXON	0	69	5	0	74	0	65	0	0	65	5	74	0	65	chr5_150711121
chr5	150731136	150731136	7.6	7.6%_66r	chr5	150731136	DCTN4	EXON	0	61	5	0	66	0	50	0	0	50	5	66	0	50	chr5_150731136
chr5	150733429	150733429	17	17.0%_53r	chr5	150733429	DCTN4	EXON	1	43	9	0	53	0	53	0	0	53	9	53	0	53	chr5_150733429
chr5	150753509	150753509	43.9	43.9%_57r	chr5	150753509	DCTN4	EXON	0	32	25	0	57	0	70	0	0	70	25	57	0	70	chr5_150753509
chr5	150753579	150753579	19.2	19.2%_99r	chr5	150753579	DCTN4	EXON	0	80	19	0	99	0	87	0	0	87	19	99	0	87	chr5_150753579
chr5	150758911	150758911	9.7	9.7%_31r	chr5	150758911	DCTN4	EXON	0	28	3	0	31	0	24	0	0	24	3	31	0	24	chr5_150758911
chr5	179614232	179614232	7.7	7.7%_104r	chr5	179614232	HNRNPH1	EXON	0	96	8	0	104	0	103	0	0	103	8	104	0	103	chr5_179614232
chr5	179614260	179614260	6.4	6.4%_94r	chr5	179614260	HNRNPH1	EXON	0	88	6	0	94	0	87	0	0	87	6	94	0	87	chr5_179614260
chr5	179614582	179614582	11.1	11.1%_81r	chr5	179614582	HNRNPH1	EXON	0	72	9	0	81	0	65	0	0	65	9	81	0	65	chr5_179614582
chr5	179614617	179614617	29.3	29.3%_75r	chr5	179614617	HNRNPH1	EXON	0	53	22	0	75	0	68	0	0	68	22	75	0	68	chr5_179614617
chr5	179614712	179614712	11.4	11.4%_44r	chr5	179614712	HNRNPH1	EXON	0	39	5	0	44	0	40	0	0	40	5	44	0	40	chr5_179614712
chr5	177372205	177372205	10.7	10.7%_28r	chr5	177372205	RGS14	EXON	25	0	0	3	28	29	0	0	0	29	3	28	0	29	chr5_177372205
chr5	177372214	177372214	7.1	7.1%_28r	chr5	177372214	RGS14	EXON	26	0	0	2	28	28	0	0	0	28	2	28	0	28	chr5_177372214
chr5	140668951	140668951	6.2	6.2%_48r	chr5	140668951	WDR55	EXON	45	0	0	3	48	34	0	0	0	34	3	48	0	34	chr5_140668951
chr5	140669154	140669154	16.7	16.7%_42r	chr5	140669154	WDR55	EXON	35	0	0	7	42	36	0	0	0	36	7	42	0	36	chr5_140669154
chr5	453532	453532	38.5	38.5%_26r	chr5	453532	EXOC3	EXON	16	0	0	10	26	29	0	0	0	29	10	26	0	29	chr5_453532
chr5	453574	453574	9.7	9.7%_31r	chr5	453574	EXOC3	EXON	28	0	0	3	31	18	0	0	0	18	3	31	0	18	chr5_453574
chr5	456902	456902	7.7	7.7%_26r	chr5	456902	EXOC3	EXON	24	0	0	2	26	22	0	0	0	22	2	26	0	22	chr5_456902
chr5	465205	465205	16	16.0%_25r	chr5	465205	EXOC3	EXON	21	0	0	4	25	17	0	0	0	17	4	25	0	17	chr5_465205
chr5	466837	466837	6.1	6.1%_33r	chr5	466837	EXOC3	EXON	31	0	0	2	33	30	0	1	0	31	2	33	0	31	chr5_466837
chr5	467035	467035	9.5	9.5%_21r	chr5	467035	EXOC3	EXON	19	0	0	2	21	18	0	0	0	18	2	21	0	18	chr5_467035
chr5	467097	467097	19	19.0%_21r	chr5	467097	EXOC3	EXON	17	0	0	4	21	22	0	0	0	22	4	21	0	22	chr5_467097
chr5	467176	467176	12.5	12.5%_24r	chr5	467176	EXOC3	EXON	21	0	0	3	24	17	0	0	0	17	3	24	0	17	chr5_467176
chr5	172768556	172768556	23.4	23.4%_111r	chr5	172768556	DUSP1	EXON	0	85	26	0	111	0	239	0	0	239	26	111	0	239	chr5_172768556
chr5	111730473	111730473	8	8.0%_25r	chr5	111730473	NREP	EXON	0	23	2	0	25	0	17	0	0	17	2	25	0	17	chr5_111730473
chr5	163516555	163516555	27.3	27.3%_143r	chr5	163516555	MAT2B	EXON	104	0	0	39	143	122	0	1	0	123	39	143	0	123	chr5_163516555
chr5	163517669	163517669	6.1	6.1%_165r	chr5	163517669	MAT2B	EXON	155	0	0	10	165	140	0	0	0	140	10	165	0	140	chr5_163517669
chr5	163518659	163518659	15.6	15.6%_147r	chr5	163518659	MAT2B	EXON	124	0	0	23	147	129	0	0	0	129	23	147	0	129	chr5_163518659
chr5	163518926	163518926	11.5	11.5%_183r	chr5	163518926	MAT2B	EXON	162	0	0	21	183	162	0	0	0	162	21	183	0	162	chr5_163518926
chr5	163519276	163519276	38.1	38.1%_105r	chr5	163519276	MAT2B	EXON	64	1	0	40	105	94	1	0	0	95	40	105	0	95	chr5_163519276
chr5	163519281	163519281	22.1	22.1%_77r	chr5	163519281	MAT2B	EXON	60	0	0	17	77	69	0	0	0	69	17	77	0	69	chr5_163519281
chr5	163519283	163519283	69.1	69.1%_81r	chr5	163519283	MAT2B	EXON	25	0	0	56	81	70	0	0	0	70	56	81	0	70	chr5_163519283
chr5	132192391	132192391	10	10.0%_20r	chr5	132192391	P4HA2	EXON	0	18	2	0	20	0	14	0	0	14	2	20	0	14	chr5_132192391
chr5	132192703	132192703	34	34.0%_53r	chr5	132192703	P4HA2	EXON	0	35	18	0	53	0	43	0	0	43	18	53	0	43	chr5_132192703
chr5	132192729	132192729	11.3	11.3%_53r	chr5	132192729	P4HA2	EXON	0	47	6	0	53	0	31	0	0	31	6	53	0	31	chr5_132192729
chr5	132192738	132192738	13	13.0%_46r	chr5	132192738	P4HA2	EXON	0	40	6	0	46	0	30	0	0	30	6	46	0	30	chr5_132192738
chr5	132192743	132192743	11.6	11.6%_43r	chr5	132192743	P4HA2	EXON	0	38	5	0	43	0	39	0	0	39	5	43	0	39	chr5_132192743
chr5	132192756	132192756	17.1	17.1%_35r	chr5	132192756	P4HA2	EXON	0	29	6	0	35	0	38	0	0	38	6	35	0	38	chr5_132192756
chr5	132192759	132192759	6.9	6.9%_29r	chr5	132192759	P4HA2	EXON	0	27	2	0	29	0	34	0	0	34	2	29	0	34	chr5_132192759
chr5	132192792	132192792	27.6	27.6%_29r	chr5	132192792	P4HA2	EXON	0	21	8	0	29	0	24	0	0	24	8	29	0	24	chr5_132192792
chr5	132192794	132192794	31	31.0%_29r	chr5	132192794	P4HA2	EXON	0	20	9	0	29	0	23	0	0	23	9	29	0	23	chr5_132192794
chr5	132192800	132192800	65.5	65.5%_29r	chr5	132192800	P4HA2	EXON	0	10	19	0	29	0	26	0	0	26	19	29	0	26	chr5_132192800
chr5	132192805	132192805	7.1	7.1%_28r	chr5	132192805	P4HA2	EXON	0	26	2	0	28	0	24	0	0	24	2	28	0	24	chr5_132192805
chr5	132192872	132192872	42.3	42.3%_78r	chr5	132192872	P4HA2	EXON	0	45	33	0	78	0	67	0	0	67	33	78	0	67	chr5_132192872
chr5	132198907	132198907	11.7	11.7%_60r	chr5	132198907	P4HA2	EXON	0	53	7	0	60	0	35	0	0	35	7	60	0	35	chr5_132198907
chr5	132198909	132198909	10.9	10.9%_64r	chr5	132198909	P4HA2	EXON	1	56	7	0	64	0	39	0	0	39	7	64	0	39	chr5_132198909
chr5	132203838	132203838	44.2	44.2%_43r	chr5	132203838	P4HA2	EXON	0	24	19	0	43	0	44	0	0	44	19	43	0	44	chr5_132203838
chr5	132204101	132204101	12.8	12.8%_39r	chr5	132204101	P4HA2	EXON	0	34	5	0	39	0	28	0	0	28	5	39	0	28	chr5_132204101
chr5	132209211	132209211	14.3	14.3%_98r	chr5	132209211	P4HA2	EXON	0	84	14	0	98	0	56	0	0	56	14	98	0	56	chr5_132209211
chr5	132209240	132209240	13.9	13.9%_72r	chr5	132209240	P4HA2	EXON	0	61	10	1	72	0	39	0	0	39	10	72	0	39	chr5_132209240
chr5	132210376	132210376	45.5	45.5%_55r	chr5	132210376	P4HA2	EXON	0	30	25	0	55	0	51	0	0	51	25	55	0	51	chr5_132210376
chr5	132210511	132210511	9.8	9.8%_61r	chr5	132210511	P4HA2	EXON	0	55	6	0	61	0	45	0	0	45	6	61	0	45	chr5_132210511
chr5	132210514	132210514	12.5	12.5%_64r	chr5	132210514	P4HA2	EXON	0	56	8	0	64	0	44	0	0	44	8	64	0	44	chr5_132210514
chr5	132210517	132210517	8.6	8.6%_58r	chr5	132210517	P4HA2	EXON	0	53	5	0	58	0	39	0	0	39	5	58	0	39	chr5_132210517
chr5	43534938	43534938	7.1	7.1%_28r	chr5	43534938	PAIP1	EXON	0	26	2	0	28	0	28	0	0	28	2	28	0	28	chr5_43534938
chr5	43535609	43535609	8.7	8.7%_23r	chr5	43535609	PAIP1	EXON	0	21	2	0	23	0	23	0	0	23	2	23	0	23	chr5_43535609
chr5	32126287	32126287	17.2	17.2%_58r	chr5	32126287	GOLPH3	EXON	0	48	10	0	58	0	63	0	0	63	10	58	0	63	chr5_32126287
chr5	32126551	32126551	20	20.0%_80r	chr5	32126551	GOLPH3	EXON	0	64	16	0	80	0	67	0	0	67	16	80	0	67	chr5_32126551
chr5	32135575	32135575	6.1	6.1%_66r	chr5	32135575	GOLPH3	EXON	0	62	4	0	66	0	66	0	0	66	4	66	0	66	chr5_32135575
chr5	32135606	32135606	13.7	13.7%_51r	chr5	32135606	GOLPH3	EXON	0	44	7	0	51	0	45	0	0	45	7	51	0	45	chr5_32135606
chr5	32135640	32135640	20.8	20.8%_53r	chr5	32135640	GOLPH3	EXON	0	42	11	0	53	0	29	0	0	29	11	53	0	29	chr5_32135640
chr5	32143791	32143791	72.4	72.4%_58r	chr5	32143791	GOLPH3	EXON	0	16	42	0	58	0	66	0	0	66	42	58	0	66	chr5_32143791
chr5	178231117	178231117	9.1	9.1%_22r	chr5	178231117	PHYKPL	INTRON	0	20	2	0	22	0	33	0	0	33	2	22	0	33	chr5_178231117
chr5	53098195	53098195	11.1	11.1%_36r	chr5	53098195	MOCS2	EXON	1	31	4	0	36	0	21	0	0	21	4	36	0	21	chr5_53098195
chr5	53098207	53098207	9.7	9.7%_31r	chr5	53098207	MOCS2	EXON	0	28	3	0	31	0	11	0	0	11	3	31	0	11	chr5_53098207
chr5	53098360	53098360	24.7	24.7%_81r	chr5	53098360	MOCS2	EXON	0	61	20	0	81	0	65	0	0	65	20	81	0	65	chr5_53098360
chr5	53101405	53101405	12.5	12.5%_184r	chr5	53101405	MOCS2	EXON	0	161	23	0	184	0	116	0	0	116	23	184	0	116	chr5_53101405
chr5	53101436	53101436	18.1	18.1%_138r	chr5	53101436	MOCS2	EXON	0	113	25	0	138	0	100	0	0	100	25	138	0	100	chr5_53101436
chr5	470761	470761	11.1	11.1%_27r	chr5	470761	SLC9A3	EXON	1	23	3	0	27	0	19	0	0	19	3	27	0	19	chr5_470761
chr5	80775723	80775723	7.1	7.1%_28r	chr5	80775723	MSH3	EXON	26	0	0	2	28	24	0	0	0	24	2	28	0	24	chr5_80775723
chr5	140567196	140567196	17.3	17.3%_197r	chr5	140567196	SLC35A4	EXON	163	0	0	34	197	140	0	0	0	140	34	197	0	140	chr5_140567196
chr5	140567464	140567464	8.5	8.5%_177r	chr5	140567464	SLC35A4	EXON	162	0	0	15	177	127	0	0	0	127	15	177	0	127	chr5_140567464
chr5	140567601	140567601	9.1	9.1%_99r	chr5	140567601	SLC35A4	EXON	90	0	0	9	99	90	0	0	0	90	9	99	0	90	chr5_140567601
chr5	98901263	98901263	9.1	9.1%_22r	chr5	98901263	CHD1	EXON	0	20	2	0	22	0	24	0	0	24	2	22	0	24	chr5_98901263
chr5	98901278	98901278	11.5	11.5%_26r	chr5	98901278	CHD1	EXON	0	23	3	0	26	0	29	0	0	29	3	26	0	29	chr5_98901278
chr5	98901281	98901281	16.7	16.7%_24r	chr5	98901281	CHD1	EXON	0	20	4	0	24	0	26	0	0	26	4	24	0	26	chr5_98901281
chr5	98903901	98903901	11.5	11.5%_26r	chr5	98903901	CHD1	EXON	0	23	3	0	26	0	47	0	0	47	3	26	0	47	chr5_98903901
chr5	56919812	56919812	18.2	18.2%_22r	chr5	56919812	MIER3	EXON	0	18	4	0	22	0	17	0	0	17	4	22	0	17	chr5_56919812
chr5	56920326	56920326	8.3	8.3%_24r	chr5	56920326	MIER3	EXON	0	22	2	0	24	0	31	0	0	31	2	24	0	31	chr5_56920326
chr5	56933343	56933343	12.5	12.5%_24r	chr5	56933343	MIER3	EXON	0	21	3	0	24	0	15	0	0	15	3	24	0	15	chr5_56933343
chr5	56937590	56937590	9.4	9.4%_32r	chr5	56937590	MIER3	EXON	0	29	3	0	32	0	14	0	0	14	3	32	0	14	chr5_56937590
chr5	50397544	50397544	10	10.0%_30r	chr5	50397544	EMB	EXON	0	27	3	0	30	0	20	0	0	20	3	30	0	20	chr5_50397544
chr5	50399080	50399080	6.7	6.7%_30r	chr5	50399080	EMB	EXON	0	28	2	0	30	0	22	0	0	22	2	30	0	22	chr5_50399080
chr5	50403254	50403254	23.3	23.3%_60r	chr5	50403254	EMB	EXON	0	46	14	0	60	0	54	0	0	54	14	60	0	54	chr5_50403254
chr5	1798470	1798470	8.1	8.1%_161r	chr5	1798470	MRPL36	EXON	0	148	13	0	161	0	140	0	0	140	13	161	0	140	chr5_1798470
chr5	34823177	34823177	7.9	7.9%_38r	chr5	34823177	RAI14	EXON	35	0	0	3	38	51	0	0	0	51	3	38	0	51	chr5_34823177
chr5	34823328	34823328	8.3	8.3%_36r	chr5	34823328	RAI14	EXON	33	0	0	3	36	57	0	0	0	57	3	36	0	57	chr5_34823328
chr5	34823361	34823361	7.7	7.7%_26r	chr5	34823361	RAI14	EXON	24	0	0	2	26	30	0	0	0	30	2	26	0	30	chr5_34823361
chr5	34823429	34823429	6.1	6.1%_33r	chr5	34823429	RAI14	EXON	31	0	0	2	33	40	0	0	0	40	2	33	0	40	chr5_34823429
chr5	34824155	34824155	8.7	8.7%_23r	chr5	34824155	RAI14	EXON	21	0	0	2	23	25	0	0	0	25	2	23	0	25	chr5_34824155
chr5	34824208	34824208	24.1	24.1%_29r	chr5	34824208	RAI14	EXON	22	0	0	7	29	20	1	0	0	21	7	29	0	21	chr5_34824208
chr5	34829771	34829771	7.1	7.1%_28r	chr5	34829771	RAI14	EXON	26	0	0	2	28	32	0	0	0	32	2	28	0	32	chr5_34829771
chr5	34830713	34830713	9.1	9.1%_33r	chr5	34830713	RAI14	EXON	30	0	0	3	33	24	0	0	0	24	3	33	0	24	chr5_34830713
chr5	34830948	34830948	9.4	9.4%_32r	chr5	34830948	RAI14	EXON	29	0	0	3	32	24	0	0	0	24	3	32	0	24	chr5_34830948
chr5	34831814	34831814	14.8	14.8%_27r	chr5	34831814	RAI14	EXON	23	0	0	4	27	15	0	0	0	15	4	27	0	15	chr5_34831814
chr5	34831910	34831910	27.3	27.3%_22r	chr5	34831910	RAI14	EXON	16	0	0	6	22	20	0	0	0	20	6	22	0	20	chr5_34831910
chr5	34832007	34832007	12.1	12.1%_33r	chr5	34832007	RAI14	EXON	29	0	0	4	33	34	0	0	0	34	4	33	0	34	chr5_34832007
chr5	34832010	34832010	10.3	10.3%_29r	chr5	34832010	RAI14	EXON	26	0	0	3	29	32	0	0	0	32	3	29	0	32	chr5_34832010
chr5	34832304	34832304	15	15.0%_20r	chr5	34832304	RAI14	EXON	17	0	0	3	20	13	0	0	0	13	3	20	0	13	chr5_34832304
chr5	34832322	34832322	10	10.0%_20r	chr5	34832322	RAI14	EXON	18	0	0	2	20	13	0	0	0	13	2	20	0	13	chr5_34832322
chr5	34832334	34832334	25	25.0%_20r	chr5	34832334	RAI14	EXON	15	0	0	5	20	13	0	0	0	13	5	20	0	13	chr5_34832334
chr5	139307575	139307575	18	18.0%_183r	chr5	139307575	MATR3	EXON	150	0	0	33	183	241	0	0	0	241	33	183	0	241	chr5_139307575
chr5	139307613	139307613	20	20.0%_185r	chr5	139307613	MATR3	EXON	148	0	0	37	185	221	0	0	0	221	37	185	0	221	chr5_139307613
chr5	139308042	139308042	26.4	26.4%_254r	chr5	139308042	MATR3	EXON	187	0	0	67	254	276	1	0	0	277	67	254	0	277	chr5_139308042
chr5	139308143	139308143	12.5	12.5%_224r	chr5	139308143	MATR3	EXON	196	0	0	28	224	253	0	0	0	253	28	224	0	253	chr5_139308143
chr5	139308298	139308298	8.5	8.5%_331r	chr5	139308298	MATR3	EXON	303	0	0	28	331	385	0	0	0	385	28	331	0	385	chr5_139308298
chr5	139325334	139325334	14.3	14.3%_21r	chr5	139325334	MATR3	INTRON	18	0	0	3	21	23	0	0	0	23	3	21	0	23	chr5_139325334
chr5	139325447	139325447	6.3	6.3%_143r	chr5	139325447	MATR3	EXON	133	1	0	9	143	148	0	0	0	148	9	143	0	148	chr5_139325447
chr5	139326230	139326230	10.5	10.5%_133r	chr5	139326230	MATR3	EXON	118	1	0	14	133	132	0	0	0	132	14	133	0	132	chr5_139326230
chr5	180576122	180576122	11.1	11.1%_27r	chr5	180576122	CNOT6	EXON	24	0	0	3	27	20	0	0	0	20	3	27	0	20	chr5_180576122
chr5	180576261	180576261	13.8	13.8%_29r	chr5	180576261	CNOT6	EXON	25	0	0	4	29	28	0	0	0	28	4	29	0	28	chr5_180576261
chr5	180576310	180576310	9.1	9.1%_33r	chr5	180576310	CNOT6	EXON	30	0	0	3	33	34	0	0	0	34	3	33	0	34	chr5_180576310
chr5	180576406	180576406	7.1	7.1%_28r	chr5	180576406	CNOT6	EXON	26	0	0	2	28	30	0	0	0	30	2	28	0	30	chr5_180576406
chr5	180576708	180576708	28.6	28.6%_28r	chr5	180576708	CNOT6	EXON	20	0	0	8	28	21	0	0	0	21	8	28	0	21	chr5_180576708
chr5	134846084	134846084	25	25.0%_20r	chr5	134846084	C5orf24	EXON	15	0	0	5	20	17	0	0	0	17	5	20	0	17	chr5_134846084
chr5	134855452	134855452	10.7	10.7%_28r	chr5	134855452	C5orf24	EXON	25	0	0	3	28	29	0	0	0	29	3	28	0	29	chr5_134855452
chr5	134855812	134855812	7.7	7.7%_39r	chr5	134855812	C5orf24	EXON	36	0	0	3	39	36	0	0	0	36	3	39	0	36	chr5_134855812
chr5	134855854	134855854	10.7	10.7%_28r	chr5	134855854	C5orf24	EXON	25	0	0	3	28	32	0	0	0	32	3	28	0	32	chr5_134855854
chr5	134856084	134856084	10	10.0%_20r	chr5	134856084	C5orf24	EXON	18	0	0	2	20	24	0	0	0	24	2	20	0	24	chr5_134856084
chr5	134857971	134857971	7.4	7.4%_27r	chr5	134857971	C5orf24	EXON	25	0	0	2	27	17	0	0	0	17	2	27	0	17	chr5_134857971
chr5	134857973	134857973	7.7	7.7%_26r	chr5	134857973	C5orf24	EXON	24	0	0	2	26	15	0	0	0	15	2	26	0	15	chr5_134857973
chr5	134857977	134857977	17.6	17.6%_34r	chr5	134857977	C5orf24	EXON	28	0	0	6	34	24	0	0	0	24	6	34	0	24	chr5_134857977
chr5	134858005	134858005	30	30.0%_20r	chr5	134858005	C5orf24	EXON	14	0	0	6	20	15	0	0	0	15	6	20	0	15	chr5_134858005
chr5	134858149	134858149	13.6	13.6%_22r	chr5	134858149	C5orf24	EXON	19	0	0	3	22	14	0	0	0	14	3	22	0	14	chr5_134858149
chr5	134858257	134858257	6.9	6.9%_29r	chr5	134858257	C5orf24	EXON	27	0	0	2	29	15	0	0	0	15	2	29	0	15	chr5_134858257
chr5	134858471	134858471	28.6	28.6%_21r	chr5	134858471	C5orf24	EXON	15	0	0	6	21	14	0	0	0	14	6	21	0	14	chr5_134858471
chr5	134859584	134859584	6.7	6.7%_60r	chr5	134859584	C5orf24	EXON	56	0	0	4	60	27	0	0	0	27	4	60	0	27	chr5_134859584
chr5	91163967	91163967	17.4	17.4%_23r	chr5	91163967	ADGRV1	EXON	19	0	0	4	23	13	0	0	0	13	4	23	0	13	chr5_91163967
chr5	111100595	111100595	6.2	6.2%_32r	chr5	111100595	WDR36	EXON	30	0	0	2	32	27	0	0	0	27	2	32	0	27	chr5_111100595
chr5	111111221	111111221	8.3	8.3%_36r	chr5	111111221	WDR36	EXON	33	0	0	3	36	40	0	0	0	40	3	36	0	40	chr5_111111221
chr5	55626225	55626225	15	15.0%_20r	chr5	55626225	SLC38A9	EXON	0	17	3	0	20	0	22	0	0	22	3	20	0	22	chr5_55626225
chr5	65518135	65518135	6.1	6.1%_66r	chr5	65518135	CENPK	EXON	0	62	4	0	66	0	51	0	0	51	4	66	0	51	chr5_65518135
chr5	65518140	65518140	8.3	8.3%_72r	chr5	65518140	CENPK	EXON	0	66	6	0	72	0	56	0	0	56	6	72	0	56	chr5_65518140
chr5	65518295	65518295	9.8	9.8%_92r	chr5	65518295	CENPK	EXON	0	83	9	0	92	0	64	0	0	64	9	92	0	64	chr5_65518295
chr5	65518360	65518360	26.2	26.2%_65r	chr5	65518360	CENPK	EXON	0	48	17	0	65	0	60	0	0	60	17	65	0	60	chr5_65518360
chr5	65554880	65554880	7.3	7.3%_82r	chr5	65554880	CENPK	EXON	0	76	6	0	82	0	58	0	0	58	6	82	0	58	chr5_65554880
chr5	65554900	65554900	9.8	9.8%_51r	chr5	65554900	CENPK	EXON	0	46	5	0	51	0	48	0	0	48	5	51	0	48	chr5_65554900
[truncated: 43,944 more rows]

## Sheet: 2-TDP-43-ADAR replicate 2
Chr	Start coordinate	End coordinate	Editing percentage	Concatenation of editing percentage and reads	Chr name	Edit coordinate	Name	Type	A count	T count	C count	G count	Total nt count	A count from wtRNA	T count from WT RNA	C count from WT RNA	G count from WT RNA	Total count from WT RNA	Editbase count	Total nt count	Editbase count from WT RNA	Total nt count from WT Rna	Identifier
chr9	129829437	129829437	6.5	6.5%_108r	chr9	129829437	C9orf78	EXON	0	101	7	0	108	0	99	0	0	99	7	108	0	99	chr9_129829437
chr9	129830942	129830942	8.5	8.5%_71r	chr9	129830942	C9orf78	EXON	0	65	6	0	71	0	82	0	0	82	6	71	0	82	chr9_129830942
chr9	128229303	128229303	8.3	8.3%_24r	chr9	128229303	DNM1	INTRON	22	0	0	2	24	18	0	0	0	18	2	24	0	18	chr9_128229303
chr9	128632945	128632945	13	13.0%_23r	chr9	128632945	SPTAN1	EXON	20	0	0	3	23	16	0	0	0	16	3	23	0	16	chr9_128632945
chr9	113407345	113407345	27.8	27.8%_133r	chr9	113407345	POLE3	EXON	0	96	37	0	133	0	146	0	0	146	37	133	0	146	chr9_113407345
chr9	113407388	113407388	7	7.0%_57r	chr9	113407388	POLE3	EXON	0	53	4	0	57	0	52	0	0	52	4	57	0	52	chr9_113407388
chr9	113407983	113407983	27.1	27.1%_118r	chr9	113407983	POLE3	EXON	0	86	32	0	118	0	124	0	0	124	32	118	0	124	chr9_113407983
chr9	113408000	113408000	8.6	8.6%_139r	chr9	113408000	POLE3	EXON	0	127	12	0	139	0	138	0	0	138	12	139	0	138	chr9_113408000
chr9	113408005	113408005	6.4	6.4%_157r	chr9	113408005	POLE3	EXON	0	147	10	0	157	0	160	0	0	160	10	157	0	160	chr9_113408005
chr9	113408037	113408037	8	8.0%_226r	chr9	113408037	POLE3	EXON	0	208	18	0	226	0	245	0	0	245	18	226	0	245	chr9_113408037
chr9	113408050	113408050	15.2	15.2%_224r	chr9	113408050	POLE3	EXON	0	190	34	0	224	0	266	0	0	266	34	224	0	266	chr9_113408050
chr9	113408089	113408089	15	15.0%_153r	chr9	113408089	POLE3	EXON	0	130	23	0	153	0	152	0	0	152	23	153	0	152	chr9_113408089
chr9	113408104	113408104	25.5	25.5%_165r	chr9	113408104	POLE3	EXON	1	122	42	0	165	0	143	0	0	143	42	165	0	143	chr9_113408104
chr9	113408115	113408115	11	11.0%_182r	chr9	113408115	POLE3	EXON	0	162	20	0	182	0	177	0	0	177	20	182	0	177	chr9_113408115
chr9	113408120	113408120	10.6	10.6%_180r	chr9	113408120	POLE3	EXON	0	161	19	0	180	0	176	0	0	176	19	180	0	176	chr9_113408120
chr9	113408128	113408128	7.7	7.7%_194r	chr9	113408128	POLE3	EXON	0	179	15	0	194	0	182	0	0	182	15	194	0	182	chr9_113408128
chr9	113408309	113408309	16.2	16.2%_148r	chr9	113408309	POLE3	EXON	0	124	24	0	148	0	175	0	0	175	24	148	0	175	chr9_113408309
chr9	113408312	113408312	56.9	56.9%_130r	chr9	113408312	POLE3	EXON	0	56	74	0	130	0	155	0	0	155	74	130	0	155	chr9_113408312
chr9	113408317	113408317	22.5	22.5%_160r	chr9	113408317	POLE3	EXON	0	124	36	0	160	0	181	0	0	181	36	160	0	181	chr9_113408317
chr9	113408342	113408342	6.7	6.7%_224r	chr9	113408342	POLE3	EXON	0	209	15	0	224	0	253	0	0	253	15	224	0	253	chr9_113408342
chr9	113408343	113408343	7.2	7.2%_223r	chr9	113408343	POLE3	EXON	0	207	16	0	223	0	255	0	0	255	16	223	0	255	chr9_113408343
chr9	113408408	113408408	9.7	9.7%_124r	chr9	113408408	POLE3	EXON	0	112	12	0	124	0	100	0	0	100	12	124	0	100	chr9_113408408
chr9	113408514	113408514	15	15.0%_133r	chr9	113408514	POLE3	EXON	1	112	20	0	133	0	124	0	0	124	20	133	0	124	chr9_113408514
chr9	113408524	113408524	28.1	28.1%_146r	chr9	113408524	POLE3	EXON	0	104	41	1	146	0	140	0	0	140	41	146	0	140	chr9_113408524
chr9	113408778	113408778	47.7	47.7%_107r	chr9	113408778	POLE3	EXON	0	56	51	0	107	0	127	0	0	127	51	107	0	127	chr9_113408778
chr9	113408978	113408978	11.8	11.8%_127r	chr9	113408978	POLE3	EXON	0	112	15	0	127	0	130	0	0	130	15	127	0	130	chr9_113408978
chr9	34086673	34086673	9.7	9.7%_31r	chr9	34086673	DCAF12	EXON	0	28	3	0	31	0	29	0	0	29	3	31	0	29	chr9_34086673
chr9	34086688	34086688	9.1	9.1%_33r	chr9	34086688	DCAF12	EXON	0	30	3	0	33	0	31	0	0	31	3	33	0	31	chr9_34086688
chr9	34086758	34086758	6.7	6.7%_30r	chr9	34086758	DCAF12	EXON	0	28	2	0	30	0	27	0	0	27	2	30	0	27	chr9_34086758
chr9	34086770	34086770	24.1	24.1%_29r	chr9	34086770	DCAF12	EXON	0	22	7	0	29	0	32	0	0	32	7	29	0	32	chr9_34086770
chr9	34086824	34086824	9.1	9.1%_33r	chr9	34086824	DCAF12	EXON	0	30	3	0	33	0	14	0	0	14	3	33	0	14	chr9_34086824
chr9	34087038	34087038	39.3	39.3%_28r	chr9	34087038	DCAF12	EXON	0	17	11	0	28	0	17	0	0	17	11	28	0	17	chr9_34087038
chr9	34087039	34087039	6.7	6.7%_30r	chr9	34087039	DCAF12	EXON	0	28	2	0	30	0	18	0	0	18	2	30	0	18	chr9_34087039
chr9	34087158	34087158	6.8	6.8%_44r	chr9	34087158	DCAF12	EXON	0	41	3	0	44	0	30	0	0	30	3	44	0	30	chr9_34087158
chr9	34087184	34087184	29.2	29.2%_24r	chr9	34087184	DCAF12	EXON	0	17	7	0	24	0	26	0	0	26	7	24	0	26	chr9_34087184
chr9	34087252	34087252	6.7	6.7%_30r	chr9	34087252	DCAF12	EXON	0	28	2	0	30	0	30	0	0	30	2	30	0	30	chr9_34087252
chr9	34087264	34087264	45.5	45.5%_22r	chr9	34087264	DCAF12	EXON	0	12	10	0	22	0	22	0	0	22	10	22	0	22	chr9_34087264
chr9	34087275	34087275	6.1	6.1%_33r	chr9	34087275	DCAF12	EXON	1	29	2	1	33	0	34	0	1	35	2	33	0	35	chr9_34087275
chr9	34087284	34087284	10.3	10.3%_39r	chr9	34087284	DCAF12	EXON	0	35	4	0	39	0	37	0	0	37	4	39	0	37	chr9_34087284
chr9	34087417	34087417	59.3	59.3%_27r	chr9	34087417	DCAF12	EXON	0	11	16	0	27	0	30	0	0	30	16	27	0	30	chr9_34087417
chr9	34087434	34087434	9.7	9.7%_31r	chr9	34087434	DCAF12	EXON	0	28	3	0	31	0	39	0	0	39	3	31	0	39	chr9_34087434
chr9	34087435	34087435	31.2	31.2%_32r	chr9	34087435	DCAF12	EXON	0	22	10	0	32	0	39	0	0	39	10	32	0	39	chr9_34087435
chr9	34087693	34087693	10.3	10.3%_29r	chr9	34087693	DCAF12	EXON	0	26	3	0	29	0	13	0	0	13	3	29	0	13	chr9_34087693
chr9	34087699	34087699	6.9	6.9%_29r	chr9	34087699	DCAF12	EXON	0	27	2	0	29	0	12	0	0	12	2	29	0	12	chr9_34087699
chr9	34087915	34087915	10	10.0%_30r	chr9	34087915	DCAF12	EXON	0	27	3	0	30	0	26	0	0	26	3	30	0	26	chr9_34087915
chr9	34087952	34087952	9.3	9.3%_43r	chr9	34087952	DCAF12	EXON	0	39	4	0	43	0	28	0	0	28	4	43	0	28	chr9_34087952
chr9	34087997	34087997	16.7	16.7%_24r	chr9	34087997	DCAF12	EXON	0	20	4	0	24	0	27	0	0	27	4	24	0	27	chr9_34087997
chr9	34088085	34088085	8.7	8.7%_23r	chr9	34088085	DCAF12	EXON	0	21	2	0	23	0	19	0	0	19	2	23	0	19	chr9_34088085
chr9	34088092	34088092	8	8.0%_25r	chr9	34088092	DCAF12	EXON	0	23	2	0	25	0	23	0	0	23	2	25	0	23	chr9_34088092
chr9	34088248	34088248	7	7.0%_43r	chr9	34088248	DCAF12	EXON	0	40	3	0	43	0	36	0	0	36	3	43	0	36	chr9_34088248
chr9	34088401	34088401	8.7	8.7%_46r	chr9	34088401	DCAF12	EXON	0	42	4	0	46	0	28	0	0	28	4	46	0	28	chr9_34088401
chr9	34089459	34089459	7.5	7.5%_40r	chr9	34089459	DCAF12	EXON	0	37	3	0	40	0	33	0	0	33	3	40	0	33	chr9_34089459
chr9	34089569	34089569	6.4	6.4%_47r	chr9	34089569	DCAF12	EXON	0	44	3	0	47	0	50	0	0	50	3	47	0	50	chr9_34089569
chr9	34096717	34096717	14.5	14.5%_62r	chr9	34096717	DCAF12	EXON	0	53	9	0	62	0	54	0	0	54	9	62	0	54	chr9_34096717
chr9	34098406	34098406	12.7	12.7%_55r	chr9	34098406	DCAF12	EXON	0	48	7	0	55	0	43	0	0	43	7	55	0	43	chr9_34098406
chr9	34098475	34098475	11.1	11.1%_27r	chr9	34098475	DCAF12	EXON	0	24	3	0	27	0	26	0	0	26	3	27	0	26	chr9_34098475
chr9	34106441	34106441	6.2	6.2%_64r	chr9	34106441	DCAF12	EXON	0	60	4	0	64	0	47	0	0	47	4	64	0	47	chr9_34106441
chr9	34125185	34125185	10.4	10.4%_48r	chr9	34125185	DCAF12	EXON	0	43	5	0	48	0	48	0	0	48	5	48	0	48	chr9_34125185
chr9	34125251	34125251	20.7	20.7%_29r	chr9	34125251	DCAF12	EXON	0	23	6	0	29	0	22	0	0	22	6	29	0	22	chr9_34125251
chr9	34125252	34125252	40.7	40.7%_27r	chr9	34125252	DCAF12	EXON	0	16	11	0	27	0	17	0	0	17	11	27	0	17	chr9_34125252
chr9	34126434	34126434	7.7	7.7%_26r	chr9	34126434	DCAF12	EXON	0	24	2	0	26	0	15	0	0	15	2	26	0	15	chr9_34126434
chr9	112684104	112684104	20	20.0%_30r	chr9	112684104	INIP	EXON	0	24	6	0	30	0	32	0	0	32	6	30	0	32	chr9_112684104
chr9	112684279	112684279	8	8.0%_25r	chr9	112684279	INIP	EXON	0	23	2	0	25	0	39	0	0	39	2	25	0	39	chr9_112684279
chr9	112684284	112684284	9.5	9.5%_21r	chr9	112684284	INIP	EXON	0	19	2	0	21	0	34	0	0	34	2	21	0	34	chr9_112684284
chr9	112685839	112685839	25	25.0%_24r	chr9	112685839	INIP	EXON	0	18	6	0	24	0	16	0	0	16	6	24	0	16	chr9_112685839
chr9	112687245	112687245	7	7.0%_43r	chr9	112687245	INIP	EXON	0	40	3	0	43	0	53	0	0	53	3	43	0	53	chr9_112687245
chr9	112687559	112687559	8.8	8.8%_34r	chr9	112687559	INIP	EXON	0	31	3	0	34	0	40	0	0	40	3	34	0	40	chr9_112687559
chr9	112687573	112687573	15.6	15.6%_45r	chr9	112687573	INIP	EXON	0	38	7	0	45	0	43	0	0	43	7	45	0	43	chr9_112687573
chr9	87726285	87726285	6.1	6.1%_49r	chr9	87726285	CTSL	EXON	46	0	0	3	49	31	0	0	0	31	3	49	0	31	chr9_87726285
chr9	87727695	87727695	18.9	18.9%_127r	chr9	87727695	CTSL	EXON	103	0	0	24	127	125	0	0	0	125	24	127	0	125	chr9_87727695
chr9	87728070	87728070	7.5	7.5%_147r	chr9	87728070	CTSL	EXON	136	0	0	11	147	131	0	0	0	131	11	147	0	131	chr9_87728070
chr9	87729712	87729712	6.2	6.2%_162r	chr9	87729712	CTSL	EXON	152	0	0	10	162	136	0	0	0	136	10	162	0	136	chr9_87729712
chr9	87730412	87730412	6.8	6.8%_148r	chr9	87730412	CTSL	EXON	138	0	0	10	148	120	0	0	0	120	10	148	0	120	chr9_87730412
chr9	87730444	87730444	14.3	14.3%_133r	chr9	87730444	CTSL	EXON	114	0	0	19	133	107	0	0	0	107	19	133	0	107	chr9_87730444
chr9	87731037	87731037	10.2	10.2%_108r	chr9	87731037	CTSL	EXON	97	0	0	11	108	93	0	0	0	93	11	108	0	93	chr9_87731037
chr9	87731094	87731094	16.4	16.4%_122r	chr9	87731094	CTSL	EXON	102	0	0	20	122	102	0	0	0	102	20	122	0	102	chr9_87731094
chr9	87731210	87731210	14.6	14.6%_89r	chr9	87731210	CTSL	EXON	76	0	0	13	89	81	1	0	0	82	13	89	0	82	chr9_87731210
chr9	122820157	122820157	9.5	9.5%_21r	chr9	122820157	PDCL	EXON	0	19	2	0	21	0	17	0	0	17	2	21	0	17	chr9_122820157
chr9	122820353	122820353	6.7	6.7%_45r	chr9	122820353	PDCL	EXON	0	42	3	0	45	0	20	0	0	20	3	45	0	20	chr9_122820353
chr9	122820396	122820396	11.1	11.1%_45r	chr9	122820396	PDCL	EXON	0	40	5	0	45	0	29	0	0	29	5	45	0	29	chr9_122820396
chr9	122820487	122820487	9.6	9.6%_52r	chr9	122820487	PDCL	EXON	0	47	5	0	52	0	32	0	0	32	5	52	0	32	chr9_122820487
chr9	122820530	122820530	6.1	6.1%_33r	chr9	122820530	PDCL	EXON	0	31	2	0	33	0	23	0	0	23	2	33	0	23	chr9_122820530
chr9	122820575	122820575	10.3	10.3%_29r	chr9	122820575	PDCL	EXON	0	26	3	0	29	0	21	0	0	21	3	29	0	21	chr9_122820575
chr9	122820599	122820599	6.1	6.1%_33r	chr9	122820599	PDCL	EXON	0	31	2	0	33	0	27	0	0	27	2	33	0	27	chr9_122820599
chr9	122823090	122823090	14.8	14.8%_27r	chr9	122823090	PDCL	EXON	0	23	4	0	27	0	19	0	1	20	4	27	0	20	chr9_122823090
chr9	122823101	122823101	10	10.0%_20r	chr9	122823101	PDCL	EXON	0	18	2	0	20	0	22	0	0	22	2	20	0	22	chr9_122823101
chr9	122823104	122823104	10	10.0%_20r	chr9	122823104	PDCL	EXON	0	18	2	0	20	0	22	0	0	22	2	20	0	22	chr9_122823104
chr9	122826677	122826677	8.3	8.3%_24r	chr9	122826677	PDCL	EXON	0	22	2	0	24	0	19	0	0	19	2	24	0	19	chr9_122826677
chr9	122989422	122989422	8.3	8.3%_24r	chr9	122989422	RABGAP1	EXON	22	0	0	2	24	17	0	0	0	17	2	24	0	17	chr9_122989422
chr9	122990200	122990200	8.3	8.3%_24r	chr9	122990200	RABGAP1	EXON	22	0	0	2	24	13	0	0	0	13	2	24	0	13	chr9_122990200
chr9	122998625	122998625	9.5	9.5%_21r	chr9	122998625	RABGAP1	EXON	19	0	0	2	21	21	0	0	0	21	2	21	0	21	chr9_122998625
chr9	122998702	122998702	7.7	7.7%_26r	chr9	122998702	RABGAP1	EXON	23	1	0	2	26	19	0	0	0	19	2	26	0	19	chr9_122998702
chr9	123074324	123074324	9.5	9.5%_21r	chr9	123074324	RABGAP1	EXON	19	0	0	2	21	18	0	0	0	18	2	21	0	18	chr9_123074324
chr9	123104088	123104088	55	55.0%_20r	chr9	123104088	RABGAP1	EXON	9	0	0	11	20	13	0	0	0	13	11	20	0	13	chr9_123104088
chr9	123104266	123104266	8	8.0%_25r	chr9	123104266	RABGAP1	EXON	23	0	0	2	25	17	0	0	0	17	2	25	0	17	chr9_123104266
chr9	123104334	123104334	14.3	14.3%_28r	chr9	123104334	RABGAP1	EXON	24	0	0	4	28	18	0	0	0	18	4	28	0	18	chr9_123104334
chr9	123104339	123104339	13	13.0%_23r	chr9	123104339	RABGAP1	EXON	20	0	0	3	23	18	0	0	0	18	3	23	0	18	chr9_123104339
chr9	123104352	123104352	17.4	17.4%_23r	chr9	123104352	RABGAP1	EXON	19	0	0	4	23	17	0	0	0	17	4	23	0	17	chr9_123104352
chr9	123104353	123104353	13	13.0%_23r	chr9	123104353	RABGAP1	EXON	20	0	0	3	23	16	0	0	0	16	3	23	0	16	chr9_123104353
chr9	123104358	123104358	14.3	14.3%_28r	chr9	123104358	RABGAP1	EXON	24	0	0	4	28	16	0	0	0	16	4	28	0	16	chr9_123104358
chr9	125227932	125227932	14.4	14.4%_104r	chr9	125227932	RABEPK	EXON	89	0	0	15	104	80	0	0	0	80	15	104	0	80	chr9_125227932
chr9	125232618	125232618	7.4	7.4%_81r	chr9	125232618	RABEPK	EXON	75	0	0	6	81	71	0	0	0	71	6	81	0	71	chr9_125232618
chr9	125233835	125233835	23.1	23.1%_39r	chr9	125233835	RABEPK	EXON	30	0	0	9	39	27	0	0	0	27	9	39	0	27	chr9_125233835
chr9	125233836	125233836	17.9	17.9%_39r	chr9	125233836	RABEPK	EXON	32	0	0	7	39	27	0	0	0	27	7	39	0	27	chr9_125233836
chr9	125233845	125233845	7	7.0%_43r	chr9	125233845	RABEPK	EXON	40	0	0	3	43	35	0	0	0	35	3	43	0	35	chr9_125233845
chr9	128949211	128949211	10	10.0%_30r	chr9	128949211	NUP188	EXON	27	0	0	3	30	32	0	0	0	32	3	30	0	32	chr9_128949211
chr9	128958826	128958826	10	10.0%_20r	chr9	128958826	NUP188	EXON	18	0	0	2	20	18	0	0	0	18	2	20	0	18	chr9_128958826
chr9	128958890	128958890	11.1	11.1%_45r	chr9	128958890	NUP188	EXON	40	0	0	5	45	47	0	0	0	47	5	45	0	47	chr9_128958890
chr9	128968552	128968552	18.2	18.2%_22r	chr9	128968552	NUP188	EXON	18	0	0	4	22	24	0	0	0	24	4	22	0	24	chr9_128968552
chr9	128968616	128968616	21.2	21.2%_33r	chr9	128968616	NUP188	EXON	26	0	0	7	33	35	0	0	0	35	7	33	0	35	chr9_128968616
chr9	128969473	128969473	8.7	8.7%_23r	chr9	128969473	NUP188	EXON	21	0	0	2	23	17	0	0	0	17	2	23	0	17	chr9_128969473
chr9	128970808	128970808	8.7	8.7%_23r	chr9	128970808	NUP188	EXON	21	0	0	2	23	30	0	0	0	30	2	23	0	30	chr9_128970808
chr9	128979285	128979285	8.3	8.3%_24r	chr9	128979285	NUP188	EXON	22	0	0	2	24	38	0	0	0	38	2	24	0	38	chr9_128979285
chr9	128980630	128980630	20.6	20.6%_34r	chr9	128980630	NUP188	EXON	27	0	0	7	34	35	0	0	0	35	7	34	0	35	chr9_128980630
chr9	128981341	128981341	8.3	8.3%_24r	chr9	128981341	NUP188	EXON	22	0	0	2	24	20	0	0	0	20	2	24	0	20	chr9_128981341
chr9	128982571	128982571	7.7	7.7%_26r	chr9	128982571	NUP188	EXON	24	0	0	2	26	26	0	0	0	26	2	26	0	26	chr9_128982571
chr9	128982592	128982592	6.2	6.2%_32r	chr9	128982592	NUP188	EXON	30	0	0	2	32	35	0	0	0	35	2	32	0	35	chr9_128982592
chr9	128982631	128982631	8.3	8.3%_24r	chr9	128982631	NUP188	EXON	22	0	0	2	24	20	0	0	0	20	2	24	0	20	chr9_128982631
chr9	128982978	128982978	12.5	12.5%_48r	chr9	128982978	NUP188	EXON	42	0	0	6	48	36	0	0	0	36	6	48	0	36	chr9_128982978
chr9	128983296	128983296	6.7	6.7%_30r	chr9	128983296	NUP188	EXON	28	0	0	2	30	22	0	0	0	22	2	30	0	22	chr9_128983296
chr9	128983342	128983342	18.2	18.2%_22r	chr9	128983342	NUP188	EXON	18	0	0	4	22	23	0	0	0	23	4	22	0	23	chr9_128983342
chr9	128983370	128983370	17.6	17.6%_34r	chr9	128983370	NUP188	EXON	28	0	0	6	34	30	0	0	0	30	6	34	0	30	chr9_128983370
chr9	128983541	128983541	7.7	7.7%_26r	chr9	128983541	NUP188	EXON	24	0	0	2	26	20	0	0	0	20	2	26	0	20	chr9_128983541
chr9	128985013	128985013	9.1	9.1%_22r	chr9	128985013	NUP188	EXON	20	0	0	2	22	29	0	0	0	29	2	22	0	29	chr9_128985013
chr9	128986593	128986593	13	13.0%_46r	chr9	128986593	NUP188	EXON	40	0	0	6	46	30	0	0	0	30	6	46	0	30	chr9_128986593
chr9	128986671	128986671	23.8	23.8%_21r	chr9	128986671	NUP188	EXON	16	0	0	5	21	13	0	0	0	13	5	21	0	13	chr9_128986671
chr9	128990190	128990190	10.3	10.3%_29r	chr9	128990190	NUP188	EXON	26	0	0	3	29	26	0	0	0	26	3	29	0	26	chr9_128990190
chr9	128998583	128998583	6.2	6.2%_32r	chr9	128998583	NUP188	EXON	30	0	0	2	32	37	0	0	0	37	2	32	0	37	chr9_128998583
chr9	128999747	128999747	6.5	6.5%_31r	chr9	128999747	NUP188	EXON	29	0	0	2	31	38	0	0	0	38	2	31	0	38	chr9_128999747
chr9	129001557	129001557	7.4	7.4%_27r	chr9	129001557	NUP188	EXON	25	0	0	2	27	37	0	0	0	37	2	27	0	37	chr9_129001557
chr9	129001573	129001573	14.3	14.3%_28r	chr9	129001573	NUP188	EXON	24	0	0	4	28	38	0	0	0	38	4	28	0	38	chr9_129001573
chr9	129001725	129001725	6.5	6.5%_31r	chr9	129001725	NUP188	EXON	29	0	0	2	31	34	0	0	0	34	2	31	0	34	chr9_129001725
chr9	129001948	129001948	9.8	9.8%_41r	chr9	129001948	NUP188	EXON	37	0	0	4	41	33	0	0	0	33	4	41	0	33	chr9_129001948
chr9	129002823	129002823	6.1	6.1%_33r	chr9	129002823	NUP188	EXON	31	0	0	2	33	48	0	0	0	48	2	33	0	48	chr9_129002823
chr9	129002972	129002972	6.2	6.2%_48r	chr9	129002972	NUP188	EXON	45	0	0	3	48	47	0	0	0	47	3	48	0	47	chr9_129002972
chr9	129005427	129005427	11.8	11.8%_34r	chr9	129005427	NUP188	EXON	30	0	0	4	34	42	0	0	0	42	4	34	0	42	chr9_129005427
chr9	129005472	129005472	12	12.0%_25r	chr9	129005472	NUP188	EXON	22	0	0	3	25	22	0	0	0	22	3	25	0	22	chr9_129005472
chr9	129006870	129006870	17.4	17.4%_23r	chr9	129006870	NUP188	EXON	19	0	0	4	23	14	0	0	0	14	4	23	0	14	chr9_129006870
chr9	129006895	129006895	13	13.0%_23r	chr9	129006895	NUP188	EXON	20	0	0	3	23	18	0	0	0	18	3	23	0	18	chr9_129006895
chr9	37357325	37357325	8.1	8.1%_37r	chr9	37357325	ZCCHC7	EXON	34	0	0	3	37	32	0	0	0	32	3	37	0	32	chr9_37357325
chr9	98078245	98078245	12.3	12.3%_316r	chr9	98078245	NANS	EXON	277	0	0	39	316	256	0	0	0	256	39	316	0	256	chr9_98078245
chr9	98080820	98080820	20.2	20.2%_242r	chr9	98080820	NANS	EXON	193	0	0	49	242	199	1	0	0	200	49	242	0	200	chr9_98080820
chr9	128822724	128822724	7.1	7.1%_28r	chr9	128822724	SPOUT1	EXON	0	26	2	0	28	0	32	0	0	32	2	28	0	32	chr9_128822724
chr9	40992433	40992433	23.1	23.1%_26r	chr9	40992433	FRG1HP	EXON	20	0	0	6	26	20	0	0	0	20	6	26	0	20	chr9_40992433
chr9	72354712	72354712	12.5	12.5%_48r	chr9	72354712	ZFAND5	EXON	0	42	6	0	48	1	67	0	0	68	6	48	0	68	chr9_72354712
chr9	72354801	72354801	6.7	6.7%_45r	chr9	72354801	ZFAND5	EXON	0	42	3	0	45	0	41	0	0	41	3	45	0	41	chr9_72354801
chr9	72354869	72354869	13.3	13.3%_60r	chr9	72354869	ZFAND5	EXON	0	52	8	0	60	0	88	0	0	88	8	60	0	88	chr9_72354869
chr9	72354921	72354921	7.1	7.1%_42r	chr9	72354921	ZFAND5	EXON	0	39	3	0	42	0	68	0	0	68	3	42	0	68	chr9_72354921
chr9	72354981	72354981	7.1	7.1%_42r	chr9	72354981	ZFAND5	EXON	0	39	3	0	42	0	51	0	0	51	3	42	0	51	chr9_72354981
chr9	72355157	72355157	8.7	8.7%_46r	chr9	72355157	ZFAND5	EXON	0	42	4	0	46	0	58	0	0	58	4	46	0	58	chr9_72355157
chr9	72355475	72355475	6.2	6.2%_32r	chr9	72355475	ZFAND5	EXON	0	30	2	0	32	0	37	0	0	37	2	32	0	37	chr9_72355475
chr9	72355544	72355544	8.1	8.1%_37r	chr9	72355544	ZFAND5	EXON	0	34	3	0	37	0	64	0	0	64	3	37	0	64	chr9_72355544
chr9	72355690	72355690	11.8	11.8%_34r	chr9	72355690	ZFAND5	EXON	0	30	4	0	34	0	52	0	0	52	4	34	0	52	chr9_72355690
chr9	72355762	72355762	20.9	20.9%_43r	chr9	72355762	ZFAND5	EXON	0	34	9	0	43	0	75	0	0	75	9	43	0	75	chr9_72355762
chr9	72355770	72355770	27	27.0%_37r	chr9	72355770	ZFAND5	EXON	0	27	10	0	37	0	80	0	0	80	10	37	0	80	chr9_72355770
chr9	72355889	72355889	52.9	52.9%_34r	chr9	72355889	ZFAND5	EXON	0	16	18	0	34	0	44	0	0	44	18	34	0	44	chr9_72355889
chr9	72355898	72355898	7.7	7.7%_26r	chr9	72355898	ZFAND5	EXON	0	24	2	0	26	0	40	0	0	40	2	26	0	40	chr9_72355898
chr9	72356944	72356944	20.8	20.8%_24r	chr9	72356944	ZFAND5	EXON	0	19	5	0	24	0	34	0	0	34	5	24	0	34	chr9_72356944
chr9	72360759	72360759	6.7	6.7%_30r	chr9	72360759	ZFAND5	EXON	0	28	2	0	30	0	40	0	0	40	2	30	0	40	chr9_72360759
chr9	72363499	72363499	8.7	8.7%_23r	chr9	72363499	ZFAND5	EXON	0	21	2	0	23	0	14	0	0	14	2	23	0	14	chr9_72363499
chr9	19049618	19049618	16.1	16.1%_31r	chr9	19049618	RRAGA	EXON	26	0	0	5	31	32	1	0	0	33	5	31	0	33	chr9_19049618
chr9	19050066	19050066	6.5	6.5%_62r	chr9	19050066	RRAGA	EXON	58	0	0	4	62	43	0	0	0	43	4	62	0	43	chr9_19050066
chr9	19050143	19050143	34	34.0%_53r	chr9	19050143	RRAGA	EXON	35	0	0	18	53	42	0	0	0	42	18	53	0	42	chr9_19050143
chr9	19050422	19050422	35.9	35.9%_39r	chr9	19050422	RRAGA	EXON	25	0	0	14	39	29	0	0	0	29	14	39	0	29	chr9_19050422
chr9	126832965	126832965	7.4	7.4%_27r	chr9	126832965	ZBTB43	EXON	25	0	0	2	27	14	0	0	0	14	2	27	0	14	chr9_126832965
chr9	126837795	126837795	7.4	7.4%_27r	chr9	126837795	ZBTB43	EXON	25	0	0	2	27	41	0	0	0	41	2	27	0	41	chr9_126837795
chr9	126837976	126837976	6.1	6.1%_33r	chr9	126837976	ZBTB43	EXON	31	0	0	2	33	39	0	0	0	39	2	33	0	39	chr9_126837976
chr9	128390027	128390027	6	6.0%_50r	chr9	128390027	URM1	EXON	47	0	0	3	50	31	0	0	0	31	3	50	0	31	chr9_128390027
chr9	128390088	128390088	15.4	15.4%_26r	chr9	128390088	URM1	EXON	22	0	0	4	26	26	0	0	0	26	4	26	0	26	chr9_128390088
chr9	128390097	128390097	13.3	13.3%_30r	chr9	128390097	URM1	EXON	26	0	0	4	30	26	0	0	0	26	4	30	0	26	chr9_128390097
chr9	128390437	128390437	28.6	28.6%_21r	chr9	128390437	URM1	EXON	15	0	0	6	21	12	0	0	0	12	6	21	0	12	chr9_128390437
chr9	136940653	136940653	8.8	8.8%_57r	chr9	136940653	FBXW5	EXON	0	52	5	0	57	0	54	0	0	54	5	57	0	54	chr9_136940653
chr9	85588382	85588382	12.5	12.5%_24r	chr9	85588382	AGTPBP1	EXON	0	21	3	0	24	0	15	0	0	15	3	24	0	15	chr9_85588382
chr9	19376504	19376504	6	6.0%_929r	chr9	19376504	RPS6	EXON	0	873	56	0	929	0	811	0	0	811	56	929	0	811	chr9_19376504
chr9	19376527	19376527	22.8	22.8%_1010r	chr9	19376527	RPS6	EXON	1	779	230	0	1010	1	969	1	0	971	230	1010	1	971	chr9_19376527
chr9	19376549	19376549	16.5	16.5%_825r	chr9	19376549	RPS6	EXON	0	688	136	1	825	1	817	0	1	819	136	825	0	819	chr9_19376549
chr9	19378449	19378449	12	12.0%_1117r	chr9	19378449	RPS6	EXON	1	982	134	0	1117	0	1024	0	0	1024	134	1117	0	1024	chr9_19378449
chr9	19378804	19378804	19.7	19.7%_1231r	chr9	19378804	RPS6	EXON	0	988	243	0	1231	0	1216	0	0	1216	243	1231	0	1216	chr9_19378804
chr9	19378825	19378825	18.2	18.2%_1380r	chr9	19378825	RPS6	EXON	1	1128	251	0	1380	0	1300	0	0	1300	251	1380	0	1300	chr9_19378825
chr9	19379525	19379525	11.6	11.6%_1055r	chr9	19379525	RPS6	EXON	0	932	122	1	1055	1	819	0	0	820	122	1055	0	820	chr9_19379525
chr9	131128401	131128401	10	10.0%_20r	chr9	131128401	NUP214	EXON	18	0	0	2	20	14	0	0	0	14	2	20	0	14	chr9_131128401
chr9	85962129	85962129	15.4	15.4%_26r	chr9	85962129	NAA35	EXON	22	0	0	4	26	30	0	0	0	30	4	26	0	30	chr9_85962129
chr9	85977397	85977397	6.1	6.1%_33r	chr9	85977397	NAA35	EXON	31	0	0	2	33	34	0	0	0	34	2	33	0	34	chr9_85977397
chr9	85978313	85978313	14.3	14.3%_21r	chr9	85978313	NAA35	EXON	18	0	0	3	21	27	0	0	0	27	3	21	0	27	chr9_85978313
chr9	86009893	86009893	6.7	6.7%_45r	chr9	86009893	NAA35	EXON	42	0	0	3	45	51	0	0	0	51	3	45	0	51	chr9_86009893
chr9	86013845	86013845	6	6.0%_50r	chr9	86013845	NAA35	EXON	47	0	0	3	50	53	0	0	0	53	3	50	0	53	chr9_86013845
chr9	86018394	86018394	22.7	22.7%_22r	chr9	86018394	NAA35	EXON	17	0	0	5	22	25	0	0	0	25	5	22	0	25	chr9_86018394
chr9	86018701	86018701	7.7	7.7%_26r	chr9	86018701	NAA35	EXON	24	0	0	2	26	29	0	0	0	29	2	26	0	29	chr9_86018701
chr9	86018723	86018723	8.8	8.8%_34r	chr9	86018723	NAA35	EXON	31	0	0	3	34	41	0	0	0	41	3	34	0	41	chr9_86018723
chr9	86018762	86018762	20.7	20.7%_29r	chr9	86018762	NAA35	EXON	23	0	0	6	29	36	0	0	0	36	6	29	0	36	chr9_86018762
chr9	99217526	99217526	8.7	8.7%_23r	chr9	99217526	ALG2	EXON	0	21	2	0	23	0	18	0	0	18	2	23	0	18	chr9_99217526
chr9	99218061	99218061	13.2	13.2%_53r	chr9	99218061	ALG2	EXON	0	46	7	0	53	0	45	0	0	45	7	53	0	45	chr9_99218061
chr9	99218441	99218441	16.7	16.7%_84r	chr9	99218441	ALG2	EXON	0	70	14	0	84	0	85	0	0	85	14	84	0	85	chr9_99218441
chr9	99221829	99221829	6.5	6.5%_31r	chr9	99221829	ALG2	EXON	0	29	2	0	31	0	23	0	0	23	2	31	0	23	chr9_99221829
chr9	99221833	99221833	21.9	21.9%_32r	chr9	99221833	ALG2	EXON	0	25	7	0	32	0	23	0	0	23	7	32	0	23	chr9_99221833
chr9	131508934	131508934	6.4	6.4%_47r	chr9	131508934	POMT1	EXON	44	0	0	3	47	37	0	0	0	37	3	47	0	37	chr9_131508934
chr9	131509014	131509014	14.3	14.3%_28r	chr9	131509014	POMT1	EXON	24	0	0	4	28	28	0	0	0	28	4	28	0	28	chr9_131509014
chr9	131513267	131513267	11.4	11.4%_44r	chr9	131513267	POMT1	EXON	39	0	0	5	44	29	0	0	0	29	5	44	0	29	chr9_131513267
chr9	131513295	131513295	6.8	6.8%_44r	chr9	131513295	POMT1	EXON	41	0	0	3	44	26	0	0	0	26	3	44	0	26	chr9_131513295
chr9	131519392	131519392	7.7	7.7%_52r	chr9	131519392	POMT1	EXON	48	0	0	4	52	29	0	0	0	29	4	52	0	29	chr9_131519392
chr9	131521431	131521431	17.9	17.9%_39r	chr9	131521431	POMT1	EXON	32	0	0	7	39	33	0	0	0	33	7	39	0	33	chr9_131521431
chr9	131523375	131523375	7.1	7.1%_84r	chr9	131523375	POMT1	EXON	78	0	0	6	84	75	0	0	0	75	6	84	0	75	chr9_131523375
chr9	131523639	131523639	11.5	11.5%_78r	chr9	131523639	POMT1	EXON	69	0	0	9	78	67	0	0	0	67	9	78	0	67	chr9_131523639
chr9	70259228	70259228	17.4	17.4%_23r	chr9	70259228	SMC5	EXON	19	0	0	4	23	28	0	0	0	28	4	23	0	28	chr9_70259228
chr9	70259257	70259257	6.5	6.5%_31r	chr9	70259257	SMC5	EXON	29	0	0	2	31	30	0	0	0	30	2	31	0	30	chr9_70259257
chr9	70278549	70278549	10.8	10.8%_37r	chr9	70278549	SMC5	EXON	33	0	0	4	37	46	0	0	0	46	4	37	0	46	chr9_70278549
chr9	70280770	70280770	6.9	6.9%_29r	chr9	70280770	SMC5	EXON	27	0	0	2	29	43	0	0	0	43	2	29	0	43	chr9_70280770
chr9	128423214	128423214	10.8	10.8%_37r	chr9	128423214	CERCAM	EXON	33	0	0	4	37	23	0	0	0	23	4	37	0	23	chr9_128423214
chr9	128434111	128434111	6.1	6.1%_33r	chr9	128434111	CERCAM	EXON	31	0	0	2	33	19	0	0	0	19	2	33	0	19	chr9_128434111
chr9	128434163	128434163	8	8.0%_25r	chr9	128434163	CERCAM	EXON	23	0	0	2	25	26	0	0	0	26	2	25	0	26	chr9_128434163
chr9	128437124	128437124	16	16.0%_25r	chr9	128437124	CERCAM	EXON	21	0	0	4	25	17	1	1	0	19	4	25	0	19	chr9_128437124
chr9	97034780	97034780	27	27.0%_100r	chr9	97034780	CTSV	EXON	0	73	27	0	100	0	64	0	0	64	27	100	0	64	chr9_97034780
chr9	97035601	97035601	43.8	43.8%_112r	chr9	97035601	CTSV	EXON	0	62	49	1	112	0	69	0	1	70	49	112	0	70	chr9_97035601
chr9	97035602	97035602	21.2	21.2%_113r	chr9	97035602	CTSV	EXON	0	89	24	0	113	0	72	0	0	72	24	113	0	72	chr9_97035602
chr9	97035614	97035614	9.6	9.6%_104r	chr9	97035614	CTSV	EXON	0	94	10	0	104	0	76	0	0	76	10	104	0	76	chr9_97035614
chr9	97035654	97035654	12	12.0%_117r	chr9	97035654	CTSV	EXON	0	103	14	0	117	0	94	0	0	94	14	117	0	94	chr9_97035654
chr9	97036700	97036700	10.4	10.4%_77r	chr9	97036700	CTSV	EXON	0	69	8	0	77	0	56	0	0	56	8	77	0	56	chr9_97036700
chr9	97037253	97037253	7.4	7.4%_94r	chr9	97037253	CTSV	EXON	0	87	7	0	94	0	82	0	0	82	7	94	0	82	chr9_97037253
chr9	97037280	97037280	16.8	16.8%_95r	chr9	97037280	CTSV	EXON	0	79	16	0	95	0	71	0	0	71	16	95	0	71	chr9_97037280
chr9	97037283	97037283	26	26.0%_104r	chr9	97037283	CTSV	EXON	0	77	27	0	104	0	72	0	0	72	27	104	0	72	chr9_97037283
chr9	97037347	97037347	6.1	6.1%_49r	chr9	97037347	CTSV	EXON	0	46	3	0	49	0	45	0	0	45	3	49	0	45	chr9_97037347
chr9	97037352	97037352	29.2	29.2%_48r	chr9	97037352	CTSV	EXON	0	34	14	0	48	0	46	0	0	46	14	48	0	46	chr9_97037352
chr9	97037538	97037538	11.5	11.5%_131r	chr9	97037538	CTSV	EXON	0	116	15	0	131	0	99	0	0	99	15	131	0	99	chr9_97037538
chr9	97037941	97037941	25	25.0%_60r	chr9	97037941	CTSV	EXON	0	45	15	0	60	0	72	0	0	72	15	60	0	72	chr9_97037941
chr9	97037942	97037942	7	7.0%_57r	chr9	97037942	CTSV	EXON	0	53	4	0	57	0	72	0	0	72	4	57	0	72	chr9_97037942
chr9	97037961	97037961	11.8	11.8%_34r	chr9	97037961	CTSV	EXON	0	30	4	0	34	0	42	0	0	42	4	34	0	42	chr9_97037961
chr9	97037962	97037962	8.8	8.8%_34r	chr9	97037962	CTSV	EXON	0	31	3	0	34	0	43	0	0	43	3	34	0	43	chr9_97037962
chr9	137555053	137555053	42.9	42.9%_28r	chr9	137555053	DPH7	EXON	0	16	12	0	28	0	29	0	0	29	12	28	0	29	chr9_137555053
chr9	137555160	137555160	16.7	16.7%_42r	chr9	137555160	DPH7	EXON	0	35	7	0	42	1	27	0	1	29	7	42	0	29	chr9_137555160
chr9	137564517	137564517	29.3	29.3%_41r	chr9	137564517	DPH7	EXON	0	29	12	0	41	0	37	0	0	37	12	41	0	37	chr9_137564517
chr9	128169056	128169056	9.5	9.5%_21r	chr9	128169056	CIZ1	EXON	0	19	2	0	21	0	20	0	0	20	2	21	0	20	chr9_128169056
chr9	128169150	128169150	15.2	15.2%_33r	chr9	128169150	CIZ1	EXON	0	28	5	0	33	0	42	0	0	42	5	33	0	42	chr9_128169150
chr9	128178411	128178411	10	10.0%_20r	chr9	128178411	CIZ1	EXON	0	18	2	0	20	0	24	0	0	24	2	20	0	24	chr9_128178411
chr9	33262716	33262716	26.1	26.1%_23r	chr9	33262716	BAG1	EXON	0	17	6	0	23	0	16	0	0	16	6	23	0	16	chr9_33262716
chr9	124413988	124413988	7	7.0%_284r	chr9	124413988	PSMB7	EXON	0	264	20	0	284	0	232	0	0	232	20	284	0	232	chr9_124413988
chr9	130501071	130501071	7.5	7.5%_40r	chr9	130501071	ASS1	EXON	37	0	0	3	40	48	0	0	0	48	3	40	0	48	chr9_130501071
chr9	4663889	4663889	18.2	18.2%_22r	chr9	4663889	PLPP6	EXON	18	0	0	4	22	15	0	0	0	15	4	22	0	15	chr9_4663889
chr9	4664046	4664046	40	40.0%_20r	chr9	4664046	PLPP6	EXON	12	0	0	8	20	15	0	0	0	15	8	20	0	15	chr9_4664046
chr9	4664065	4664065	16	16.0%_25r	chr9	4664065	PLPP6	EXON	21	0	0	4	25	13	0	0	0	13	4	25	0	13	chr9_4664065
chr9	4664068	4664068	8	8.0%_25r	chr9	4664068	PLPP6	EXON	23	0	0	2	25	16	0	0	0	16	2	25	0	16	chr9_4664068
chr9	128120944	128120944	6.7	6.7%_30r	chr9	128120944	PTGES2	EXON	0	28	2	0	30	0	35	0	0	35	2	30	0	35	chr9_128120944
chr9	128120966	128120966	7.7	7.7%_26r	chr9	128120966	PTGES2	EXON	0	24	2	0	26	0	37	0	0	37	2	26	0	37	chr9_128120966
chr9	128121179	128121179	8.7	8.7%_46r	chr9	128121179	PTGES2	EXON	0	42	4	0	46	0	26	0	0	26	4	46	0	26	chr9_128121179
chr9	128122429	128122429	25	25.0%_40r	chr9	128122429	PTGES2	EXON	0	30	10	0	40	0	29	0	0	29	10	40	0	29	chr9_128122429
chr9	128123015	128123015	6.9	6.9%_29r	chr9	128123015	PTGES2	EXON	0	27	2	0	29	0	31	0	0	31	2	29	0	31	chr9_128123015
chr9	128123747	128123747	6.9	6.9%_29r	chr9	128123747	PTGES2	EXON	0	27	2	0	29	0	29	0	0	29	2	29	0	29	chr9_128123747
chr9	36191024	36191024	20.6	20.6%_68r	chr9	36191024	CLTA	EXON	53	0	1	14	68	76	0	0	0	76	14	68	0	76	chr9_36191024
chr9	36191140	36191140	12.9	12.9%_85r	chr9	36191140	CLTA	EXON	74	0	0	11	85	73	0	0	0	73	11	85	0	73	chr9_36191140
chr9	36191175	36191175	6.1	6.1%_82r	chr9	36191175	CLTA	EXON	77	0	0	5	82	77	0	0	0	77	5	82	0	77	chr9_36191175
chr9	36191202	36191202	8.3	8.3%_96r	chr9	36191202	CLTA	EXON	88	0	0	8	96	81	0	1	0	82	8	96	0	82	chr9_36191202
chr9	36191256	36191256	9.5	9.5%_105r	chr9	36191256	CLTA	EXON	93	0	2	10	105	99	0	0	0	99	10	105	0	99	chr9_36191256
chr9	36198982	36198982	13.9	13.9%_267r	chr9	36198982	CLTA	EXON	230	0	0	37	267	201	0	0	0	201	37	267	0	201	chr9_36198982
chr9	36199020	36199020	17.4	17.4%_219r	chr9	36199020	CLTA	EXON	181	0	0	38	219	206	0	0	0	206	38	219	0	206	chr9_36199020
chr9	36199038	36199038	21.9	21.9%_178r	chr9	36199038	CLTA	EXON	139	0	0	39	178	187	0	0	0	187	39	178	0	187	chr9_36199038
chr9	36204115	36204115	6.3	6.3%_238r	chr9	36204115	CLTA	EXON	223	0	0	15	238	180	0	0	0	180	15	238	0	180	chr9_36204115
chr9	36204116	36204116	6.4	6.4%_236r	chr9	36204116	CLTA	EXON	220	1	0	15	236	179	0	0	0	179	15	236	0	179	chr9_36204116
chr9	36204156	36204156	6.3	6.3%_239r	chr9	36204156	CLTA	EXON	224	0	0	15	239	184	1	0	0	185	15	239	0	185	chr9_36204156
chr9	36204162	36204162	6.7	6.7%_194r	chr9	36204162	CLTA	EXON	180	0	1	13	194	160	0	1	0	161	13	194	0	161	chr9_36204162
chr9	36211704	36211704	14.1	14.1%_177r	chr9	36211704	CLTA	EXON	152	0	0	25	177	157	0	0	0	157	25	177	0	157	chr9_36211704
chr9	36211707	36211707	31.7	31.7%_161r	chr9	36211707	CLTA	EXON	110	0	0	51	161	140	0	0	0	140	51	161	0	140	chr9_36211707
chr9	36211797	36211797	16.3	16.3%_289r	chr9	36211797	CLTA	EXON	241	0	1	47	289	210	0	0	0	210	47	289	0	210	chr9_36211797
chr9	36211850	36211850	12	12.0%_192r	chr9	36211850	CLTA	EXON	169	0	0	23	192	169	0	0	0	169	23	192	0	169	chr9_36211850
chr9	36211988	36211988	20.2	20.2%_163r	chr9	36211988	CLTA	EXON	129	0	1	33	163	151	0	0	0	151	33	163	0	151	chr9_36211988
chr9	128833284	128833284	6.5	6.5%_31r	chr9	128833284	KYAT1	EXON	0	29	2	0	31	0	28	0	0	28	2	31	0	28	chr9_128833284
chr9	135933251	135933251	6.9	6.9%_29r	chr9	135933251	UBAC1	EXON	0	27	2	0	29	0	16	0	0	16	2	29	0	16	chr9_135933251
chr9	135933437	135933437	8.3	8.3%_24r	chr9	135933437	UBAC1	EXON	0	22	2	0	24	0	25	0	0	25	2	24	0	25	chr9_135933437
chr9	135945051	135945051	8.7	8.7%_23r	chr9	135945051	UBAC1	EXON	0	21	2	0	23	0	23	0	0	23	2	23	0	23	chr9_135945051
chr9	135945172	135945172	10.8	10.8%_37r	chr9	135945172	UBAC1	EXON	0	33	4	0	37	0	21	0	0	21	4	37	0	21	chr9_135945172
chr9	135945214	135945214	12.1	12.1%_33r	chr9	135945214	UBAC1	EXON	0	29	4	0	33	0	21	0	0	21	4	33	0	21	chr9_135945214
chr9	135946319	135946319	15	15.0%_20r	chr9	135946319	UBAC1	EXON	0	17	3	0	20	0	25	0	0	25	3	20	0	25	chr9_135946319
chr9	135947857	135947857	8.7	8.7%_23r	chr9	135947857	UBAC1	EXON	0	21	2	0	23	0	21	0	0	21	2	23	0	21	chr9_135947857
chr9	135953708	135953708	8.7	8.7%_23r	chr9	135953708	UBAC1	EXON	0	21	2	0	23	0	24	0	0	24	2	23	0	24	chr9_135953708
chr9	122240182	122240182	6.1	6.1%_33r	chr9	122240182	RBM18	EXON	0	31	2	0	33	0	19	0	0	19	2	33	0	19	chr9_122240182
chr9	122240749	122240749	9.8	9.8%_41r	chr9	122240749	RBM18	EXON	0	37	4	0	41	0	26	0	0	26	4	41	0	26	chr9_122240749
chr9	122240884	122240884	9.7	9.7%_31r	chr9	122240884	RBM18	EXON	0	28	3	0	31	0	17	0	0	17	3	31	0	17	chr9_122240884
chr9	122240927	122240927	8	8.0%_25r	chr9	122240927	RBM18	EXON	0	23	2	0	25	0	17	0	0	17	2	25	0	17	chr9_122240927
chr9	122241312	122241312	13.3	13.3%_30r	chr9	122241312	RBM18	EXON	0	26	4	0	30	0	20	0	0	20	4	30	0	20	chr9_122241312
chr9	122241333	122241333	42.9	42.9%_21r	chr9	122241333	RBM18	EXON	0	12	9	0	21	0	20	0	0	20	9	21	0	20	chr9_122241333
chr9	122241605	122241605	7.5	7.5%_40r	chr9	122241605	RBM18	EXON	0	37	3	0	40	0	35	0	0	35	3	40	0	35	chr9_122241605
chr9	122241889	122241889	12.5	12.5%_32r	chr9	122241889	RBM18	EXON	0	28	4	0	32	0	36	0	0	36	4	32	0	36	chr9_122241889
chr9	122241910	122241910	14.5	14.5%_55r	chr9	122241910	RBM18	EXON	0	47	8	0	55	0	68	0	0	68	8	55	0	68	chr9_122241910
chr9	122241951	122241951	23.3	23.3%_60r	chr9	122241951	RBM18	EXON	0	46	14	0	60	0	60	0	0	60	14	60	0	60	chr9_122241951
chr9	122241957	122241957	6.3	6.3%_63r	chr9	122241957	RBM18	EXON	0	59	4	0	63	0	50	0	0	50	4	63	0	50	chr9_122241957
chr9	122242032	122242032	7.2	7.2%_69r	chr9	122242032	RBM18	EXON	0	64	5	0	69	0	60	0	0	60	5	69	0	60	chr9_122242032
chr9	128803266	128803266	9.1	9.1%_22r	chr9	128803266	TBC1D13	EXON	20	0	0	2	22	22	0	0	0	22	2	22	0	22	chr9_128803266
chr9	128809559	128809559	10	10.0%_30r	chr9	128809559	TBC1D13	EXON	27	0	0	3	30	23	0	0	0	23	3	30	0	23	chr9_128809559
chr9	128809663	128809663	16	16.0%_25r	chr9	128809663	TBC1D13	EXON	21	0	0	4	25	29	0	0	0	29	4	25	0	29	chr9_128809663
chr9	128809678	128809678	14.3	14.3%_21r	chr9	128809678	TBC1D13	EXON	18	0	0	3	21	20	0	0	0	20	3	21	0	20	chr9_128809678
chr9	128809749	128809749	26.1	26.1%_23r	chr9	128809749	TBC1D13	EXON	17	0	0	6	23	14	0	0	0	14	6	23	0	14	chr9_128809749
chr9	128809775	128809775	8	8.0%_25r	chr9	128809775	TBC1D13	EXON	23	0	0	2	25	24	0	0	0	24	2	25	0	24	chr9_128809775
chr9	128809799	128809799	13	13.0%_23r	chr9	128809799	TBC1D13	EXON	20	0	0	3	23	27	0	0	0	27	3	23	0	27	chr9_128809799
chr9	128809808	128809808	15	15.0%_20r	chr9	128809808	TBC1D13	EXON	17	0	0	3	20	26	0	0	0	26	3	20	0	26	chr9_128809808
chr9	128809923	128809923	7.4	7.4%_27r	chr9	128809923	TBC1D13	EXON	25	0	0	2	27	24	0	0	0	24	2	27	0	24	chr9_128809923
chr9	128810107	128810107	7.4	7.4%_27r	chr9	128810107	TBC1D13	EXON	25	0	0	2	27	26	0	0	0	26	2	27	0	26	chr9_128810107
chr9	122845353	122845353	7.4	7.4%_27r	chr9	122845353	RC3H2	EXON	0	25	2	0	27	0	13	0	0	13	2	27	0	13	chr9_122845353
chr9	122858048	122858048	6.9	6.9%_29r	chr9	122858048	RC3H2	EXON	0	27	2	0	29	0	15	0	0	15	2	29	0	15	chr9_122858048
chr9	122858671	122858671	7.1	7.1%_28r	chr9	122858671	RC3H2	EXON	0	26	2	0	28	0	10	0	0	10	2	28	0	10	chr9_122858671
chr9	122858860	122858860	6.7	6.7%_30r	chr9	122858860	RC3H2	EXON	0	28	2	0	30	0	20	0	1	21	2	30	0	21	chr9_122858860
chr9	122865406	122865406	10	10.0%_20r	chr9	122865406	RC3H2	EXON	0	18	2	0	20	0	18	0	0	18	2	20	0	18	chr9_122865406
chr9	122880720	122880720	8	8.0%_25r	chr9	122880720	RC3H2	EXON	0	23	2	0	25	0	17	0	0	17	2	25	0	17	chr9_122880720
chr9	122880722	122880722	7.4	7.4%_27r	chr9	122880722	RC3H2	EXON	0	25	2	0	27	0	19	0	0	19	2	27	0	19	chr9_122880722
chr9	122890380	122890380	6.7	6.7%_30r	chr9	122890380	RC3H2	EXON	0	28	2	0	30	0	17	0	0	17	2	30	0	17	chr9_122890380
chr9	111372535	111372535	20	20.0%_20r	chr9	111372535	ECPAS	EXON	0	16	4	0	20	0	23	0	0	23	4	20	0	23	chr9_111372535
chr9	111372611	111372611	10	10.0%_20r	chr9	111372611	ECPAS	EXON	0	18	2	0	20	0	24	0	0	24	2	20	0	24	chr9_111372611
chr9	111374008	111374008	25	25.0%_24r	chr9	111374008	ECPAS	EXON	0	18	6	0	24	0	33	0	0	33	6	24	0	33	chr9_111374008
chr9	108868906	108868906	8	8.0%_25r	chr9	108868906	ELP1	EXON	0	23	2	0	25	0	37	0	0	37	2	25	0	37	chr9_108868906
chr9	108868913	108868913	7.1	7.1%_28r	chr9	108868913	ELP1	EXON	0	26	2	0	28	0	32	0	0	32	2	28	0	32	chr9_108868913
chr9	108869121	108869121	28.6	28.6%_21r	chr9	108869121	ELP1	EXON	0	15	6	0	21	0	35	0	0	35	6	21	0	35	chr9_108869121
chr9	108912450	108912450	9.1	9.1%_22r	chr9	108912450	ELP1	EXON	0	20	2	0	22	0	44	0	0	44	2	22	0	44	chr9_108912450
chr9	108919311	108919311	20	20.0%_20r	chr9	108919311	ELP1	EXON	0	16	4	0	20	0	34	0	0	34	4	20	0	34	chr9_108919311
chr9	128288757	128288757	8.3	8.3%_96r	chr9	128288757	SWI5	EXON	86	1	1	8	96	86	0	0	0	86	8	96	0	86	chr9_128288757
chr9	92614875	92614875	30	30.0%_20r	chr9	92614875	IPPK	EXON	1	13	6	0	20	0	15	0	0	15	6	20	0	15	chr9_92614875
chr9	92615022	92615022	54.2	54.2%_24r	chr9	92615022	IPPK	EXON	0	11	13	0	24	0	30	0	0	30	13	24	0	30	chr9_92615022
chr9	92615872	92615872	22.7	22.7%_22r	chr9	92615872	IPPK	EXON	0	17	5	0	22	0	14	0	0	14	5	22	0	14	chr9_92615872
chr9	92615980	92615980	7.4	7.4%_27r	chr9	92615980	IPPK	EXON	0	25	2	0	27	0	15	0	0	15	2	27	0	15	chr9_92615980
chr9	92640753	92640753	15	15.0%_20r	chr9	92640753	IPPK	EXON	0	17	3	0	20	0	16	0	0	16	3	20	0	16	chr9_92640753
chr9	92648076	92648076	10.3	10.3%_29r	chr9	92648076	IPPK	EXON	0	26	3	0	29	0	18	0	0	18	3	29	0	18	chr9_92648076
chr9	92649484	92649484	8.3	8.3%_24r	chr9	92649484	IPPK	EXON	0	21	2	1	24	0	10	0	0	10	2	24	0	10	chr9_92649484
chr9	134026886	134026886	9.8	9.8%_41r	chr9	134026886	BRD3OS	EXON	37	0	0	4	41	22	0	0	0	22	4	41	0	22	chr9_134026886
chr9	89325445	89325445	26	26.0%_50r	chr9	89325445	SECISBP2	EXON	37	0	0	13	50	29	0	0	0	29	13	50	0	29	chr9_89325445
chr9	89328787	89328787	10.8	10.8%_74r	chr9	89328787	SECISBP2	EXON	65	1	0	8	74	61	0	0	0	61	8	74	0	61	chr9_89328787
chr9	89334670	89334670	10.8	10.8%_37r	chr9	89334670	SECISBP2	EXON	33	0	0	4	37	38	0	0	0	38	4	37	0	38	chr9_89334670
chr9	89348162	89348162	8.8	8.8%_34r	chr9	89348162	SECISBP2	EXON	31	0	0	3	34	20	0	0	0	20	3	34	0	20	chr9_89348162
chr9	89350683	89350683	15.4	15.4%_26r	chr9	89350683	SECISBP2	EXON	22	0	0	4	26	18	0	0	0	18	4	26	0	18	chr9_89350683
chr9	89357462	89357462	7.4	7.4%_27r	chr9	89357462	SECISBP2	EXON	25	0	0	2	27	13	0	0	0	13	2	27	0	13	chr9_89357462
chr9	89359080	89359080	38.1	38.1%_21r	chr9	89359080	SECISBP2	EXON	13	0	0	8	21	25	0	0	0	25	8	21	0	25	chr9_89359080
chr9	89359246	89359246	9.1	9.1%_22r	chr9	89359246	SECISBP2	EXON	20	0	0	2	22	13	0	0	0	13	2	22	0	13	chr9_89359246
chr9	89359303	89359303	23.8	23.8%_21r	chr9	89359303	SECISBP2	EXON	16	0	0	5	21	14	0	0	0	14	5	21	0	14	chr9_89359303
chr9	100303837	100303837	7.7	7.7%_26r	chr9	100303837	TEX10	EXON	0	24	2	0	26	0	35	0	0	35	2	26	0	35	chr9_100303837
chr9	100308624	100308624	8.1	8.1%_37r	chr9	100308624	TEX10	EXON	0	34	3	0	37	0	37	0	0	37	3	37	0	37	chr9_100308624
chr9	100321712	100321712	12.1	12.1%_33r	chr9	100321712	TEX10	EXON	0	29	4	0	33	0	27	0	0	27	4	33	0	27	chr9_100321712
chr9	100321740	100321740	17.5	17.5%_40r	chr9	100321740	TEX10	EXON	0	33	7	0	40	0	34	0	0	34	7	40	0	34	chr9_100321740
chr9	100321751	100321751	10	10.0%_40r	chr9	100321751	TEX10	EXON	0	36	4	0	40	0	41	0	0	41	4	40	0	41	chr9_100321751
chr9	100327951	100327951	7.7	7.7%_26r	chr9	100327951	TEX10	EXON	0	24	2	0	26	0	42	0	0	42	2	26	0	42	chr9_100327951
chr9	100329230	100329230	6.2	6.2%_32r	chr9	100329230	TEX10	EXON	0	30	2	0	32	0	45	0	0	45	2	32	0	45	chr9_100329230
chr9	100346135	100346135	9.8	9.8%_41r	chr9	100346135	TEX10	EXON	0	37	4	0	41	0	34	0	0	34	4	41	0	34	chr9_100346135
chr9	100346255	100346255	15.4	15.4%_26r	chr9	100346255	TEX10	EXON	0	22	4	0	26	1	26	0	0	27	4	26	0	27	chr9_100346255
chr9	100346870	100346870	8	8.0%_25r	chr9	100346870	TEX10	EXON	0	23	2	0	25	0	23	0	0	23	2	25	0	23	chr9_100346870
chr9	100346880	100346880	9.1	9.1%_22r	chr9	100346880	TEX10	EXON	0	20	2	0	22	0	25	0	0	25	2	22	0	25	chr9_100346880
chr9	100346889	100346889	7.1	7.1%_28r	chr9	100346889	TEX10	EXON	1	25	2	0	28	0	35	0	0	35	2	28	0	35	chr9_100346889
chr9	133020513	133020513	8.3	8.3%_24r	chr9	133020513	SNORD141A	EXON	22	0	0	2	24	21	1	1	0	23	2	24	0	23	chr9_133020513
chr9	33295064	33295064	6.2	6.2%_32r	chr9	33295064	NFX1	EXON	30	0	0	2	32	31	0	0	0	31	2	32	0	31	chr9_33295064
chr9	33295274	33295274	8.3	8.3%_24r	chr9	33295274	NFX1	EXON	22	0	0	2	24	25	1	0	0	26	2	24	0	26	chr9_33295274
chr9	33307203	33307203	9.1	9.1%_22r	chr9	33307203	NFX1	EXON	20	0	0	2	22	20	0	0	0	20	2	22	0	20	chr9_33307203
chr9	33307256	33307256	13.6	13.6%_22r	chr9	33307256	NFX1	EXON	19	0	0	3	22	23	0	0	0	23	3	22	0	23	chr9_33307256
chr9	33318822	33318822	9.1	9.1%_22r	chr9	33318822	NFX1	EXON	20	0	0	2	22	23	0	0	0	23	2	22	0	23	chr9_33318822
chr9	33318932	33318932	20.8	20.8%_24r	chr9	33318932	NFX1	EXON	19	0	0	5	24	37	0	0	0	37	5	24	0	37	chr9_33318932
chr9	33318943	33318943	11.5	11.5%_26r	chr9	33318943	NFX1	EXON	23	0	0	3	26	30	0	0	0	30	3	26	0	30	chr9_33318943
chr9	33328602	33328602	13.3	13.3%_30r	chr9	33328602	NFX1	EXON	26	0	0	4	30	30	0	0	0	30	4	30	0	30	chr9_33328602
chr9	33338515	33338515	9.1	9.1%_33r	chr9	33338515	NFX1	EXON	30	0	0	3	33	32	0	0	0	32	3	33	0	32	chr9_33338515
chr9	33342759	33342759	12.2	12.2%_41r	chr9	33342759	NFX1	EXON	36	0	0	5	41	43	0	0	0	43	5	41	0	43	chr9_33342759
chr9	33347113	33347113	10.3	10.3%_29r	chr9	33347113	NFX1	EXON	26	0	0	3	29	49	0	0	0	49	3	29	0	49	chr9_33347113
chr9	128309199	128309199	32.3	32.3%_96r	chr9	128309199	TRUB2	EXON	0	65	31	0	96	0	80	0	0	80	31	96	0	80	chr9_128309199
chr9	128309230	128309230	7.2	7.2%_69r	chr9	128309230	TRUB2	EXON	0	64	5	0	69	0	64	0	0	64	5	69	0	64	chr9_128309230
chr9	128309254	128309254	6.8	6.8%_73r	chr9	128309254	TRUB2	EXON	0	68	5	0	73	0	67	0	0	67	5	73	0	67	chr9_128309254
chr9	128309306	128309306	8	8.0%_50r	chr9	128309306	TRUB2	EXON	0	46	4	0	50	0	49	0	0	49	4	50	0	49	chr9_128309306
chr9	128311555	128311555	12.1	12.1%_116r	chr9	128311555	TRUB2	EXON	0	102	14	0	116	0	73	0	0	73	14	116	0	73	chr9_128311555
chr9	34649461	34649461	9.5	9.5%_63r	chr9	34649461	GALT	EXON	57	0	0	6	63	48	0	0	0	48	6	63	0	48	chr9_34649461
chr9	128390027	128390027	6	6.0%_50r	chr9	128390027	MIR1268A	INTRON	47	0	0	3	50	31	0	0	0	31	3	50	0	31	chr9_128390027
chr9	128390088	128390088	15.4	15.4%_26r	chr9	128390088	MIR1268A	INTRON	22	0	0	4	26	26	0	0	0	26	4	26	0	26	chr9_128390088
chr9	128390097	128390097	13.3	13.3%_30r	chr9	128390097	MIR1268A	INTRON	26	0	0	4	30	26	0	0	0	26	4	30	0	26	chr9_128390097
chr9	128390437	128390437	28.6	28.6%_21r	chr9	128390437	MIR1268A	INTRON	15	0	0	6	21	12	0	0	0	12	6	21	0	12	chr9_128390437
chr9	128423214	128423214	10.8	10.8%_37r	chr9	128423214	MIR1268A	INTRON	33	0	0	4	37	23	0	0	0	23	4	37	0	23	chr9_128423214
chr9	128434111	128434111	6.1	6.1%_33r	chr9	128434111	MIR1268A	INTRON	31	0	0	2	33	19	0	0	0	19	2	33	0	19	chr9_128434111
chr9	128434163	128434163	8	8.0%_25r	chr9	128434163	MIR1268A	INTRON	23	0	0	2	25	26	0	0	0	26	2	25	0	26	chr9_128434163
chr9	128437124	128437124	16	16.0%_25r	chr9	128437124	MIR1268A	INTRON	21	0	0	4	25	17	1	1	0	19	4	25	0	19	chr9_128437124
chr9	128472960	128472960	6.2	6.2%_32r	chr9	128472960	MIR1268A	INTRON	30	0	0	2	32	27	0	0	0	27	2	32	0	27	chr9_128472960
chr9	128473638	128473638	10.3	10.3%_39r	chr9	128473638	MIR1268A	INTRON	35	0	0	4	39	22	0	0	0	22	4	39	0	22	chr9_128473638
chr9	128481620	128481620	10	10.0%_20r	chr9	128481620	MIR1268A	INTRON	18	0	0	2	20	20	0	0	0	20	2	20	0	20	chr9_128481620
chr9	128481648	128481648	9.1	9.1%_22r	chr9	128481648	MIR1268A	INTRON	20	0	0	2	22	20	0	0	0	20	2	22	0	20	chr9_128481648
chr9	128484043	128484043	6.7	6.7%_30r	chr9	128484043	MIR1268A	INTRON	28	0	0	2	30	16	0	0	0	16	2	30	0	16	chr9_128484043
chr9	128484723	128484723	6.7	6.7%_30r	chr9	128484723	MIR1268A	INTRON	28	0	0	2	30	32	0	0	0	32	2	30	0	32	chr9_128484723
chr9	128484756	128484756	8.6	8.6%_35r	chr9	128484756	MIR1268A	INTRON	32	0	0	3	35	26	0	0	0	26	3	35	0	26	chr9_128484756
chr9	128484825	128484825	9.1	9.1%_33r	chr9	128484825	MIR1268A	INTRON	30	0	0	3	33	18	0	0	0	18	3	33	0	18	chr9_128484825
chr9	128485382	128485382	22.6	22.6%_31r	chr9	128485382	MIR1268A	INTRON	24	0	0	7	31	20	0	0	0	20	7	31	0	20	chr9_128485382
chr9	128492486	128492486	8.2	8.2%_49r	chr9	128492486	MIR1268A	INTRON	45	0	0	4	49	23	0	0	0	23	4	49	0	23	chr9_128492486
chr9	128492768	128492768	8	8.0%_25r	chr9	128492768	MIR1268A	INTRON	23	0	0	2	25	20	0	0	0	20	2	25	0	20	chr9_128492768
chr9	128494616	128494616	22.2	22.2%_27r	chr9	128494616	MIR1268A	INTRON	21	0	0	6	27	33	0	0	0	33	6	27	0	33	chr9_128494616
chr9	128499054	128499054	6.1	6.1%_33r	chr9	128499054	MIR1268A	INTRON	31	0	0	2	33	18	0	0	0	18	2	33	0	18	chr9_128499054
chr9	128500119	128500119	6.2	6.2%_32r	chr9	128500119	MIR1268A	INTRON	30	0	0	2	32	17	0	0	0	17	2	32	0	17	chr9_128500119
chr9	128500387	128500387	8.7	8.7%_23r	chr9	128500387	MIR1268A	INTRON	21	0	0	2	23	19	0	0	0	19	2	23	0	19	chr9_128500387
chr9	128500731	128500731	24	24.0%_25r	chr9	128500731	MIR1268A	INTRON	19	0	0	6	25	25	0	0	0	25	6	25	0	25	chr9_128500731
chr9	128500796	128500796	7.3	7.3%_41r	chr9	128500796	MIR1268A	INTRON	38	0	0	3	41	32	0	0	0	32	3	41	0	32	chr9_128500796
chr9	128515564	128515564	25	25.0%_32r	chr9	128515564	MIR1268A	INTRON	24	0	0	8	32	35	0	0	0	35	8	32	0	35	chr9_128515564
chr9	128515569	128515569	6.5	6.5%_31r	chr9	128515569	MIR1268A	INTRON	29	0	0	2	31	33	0	0	0	33	2	31	0	33	chr9_128515569
chr9	128522712	128522712	30	30.0%_30r	chr9	128522712	MIR1268A	INTRON	21	0	0	9	30	39	0	0	0	39	9	30	0	39	chr9_128522712
chr9	128522781	128522781	12.5	12.5%_24r	chr9	128522781	MIR1268A	INTRON	21	0	0	3	24	31	0	0	0	31	3	24	0	31	chr9_128522781
chr9	128523284	128523284	13.2	13.2%_38r	chr9	128523284	MIR1268A	INTRON	33	0	0	5	38	32	0	0	0	32	5	38	0	32	chr9_128523284
chr9	128523599	128523599	12.1	12.1%_33r	chr9	128523599	MIR1268A	INTRON	28	1	0	4	33	27	0	0	0	27	4	33	0	27	chr9_128523599
chr9	128523645	128523645	10	10.0%_30r	chr9	128523645	MIR1268A	INTRON	27	0	0	3	30	31	0	0	0	31	3	30	0	31	chr9_128523645
chr9	128523695	128523695	8.6	8.6%_35r	chr9	128523695	MIR1268A	INTRON	32	0	0	3	35	38	0	0	0	38	3	35	0	38	chr9_128523695
chr9	128523755	128523755	7.4	7.4%_54r	chr9	128523755	MIR1268A	INTRON	50	0	0	4	54	24	0	0	0	24	4	54	0	24	chr9_128523755
chr9	128523800	128523800	9.1	9.1%_33r	chr9	128523800	MIR1268A	INTRON	29	0	1	3	33	33	0	0	0	33	3	33	0	33	chr9_128523800
chr9	128523811	128523811	6.7	6.7%_30r	chr9	128523811	MIR1268A	INTRON	28	0	0	2	30	39	0	0	0	39	2	30	0	39	chr9_128523811
chr9	128525204	128525204	10.5	10.5%_38r	chr9	128525204	MIR1268A	INTRON	34	0	0	4	38	35	0	0	0	35	4	38	0	35	chr9_128525204
chr9	128525328	128525328	12.5	12.5%_32r	chr9	128525328	MIR1268A	INTRON	28	0	0	4	32	30	0	0	0	30	4	32	0	30	chr9_128525328
chr9	128533894	128533894	7	7.0%_71r	chr9	128533894	MIR1268A	INTRON	66	0	0	5	71	70	0	0	0	70	5	71	0	70	chr9_128533894
chr9	128539661	128539661	13.5	13.5%_37r	chr9	128539661	MIR1268A	INTRON	32	0	0	5	37	33	0	0	0	33	5	37	0	33	chr9_128539661
chr9	128539669	128539669	10.7	10.7%_28r	chr9	128539669	MIR1268A	INTRON	25	0	0	3	28	19	0	0	0	19	3	28	0	19	chr9_128539669
chr9	128539670	128539670	60.7	60.7%_28r	chr9	128539670	MIR1268A	INTRON	11	0	0	17	28	20	0	0	0	20	17	28	0	20	chr9_128539670
chr9	128540281	128540281	8.8	8.8%_34r	chr9	128540281	MIR1268A	INTRON	31	0	0	3	34	34	0	0	0	34	3	34	0	34	chr9_128540281
chr9	128540285	128540285	14.7	14.7%_34r	chr9	128540285	MIR1268A	INTRON	29	0	0	5	34	29	0	0	0	29	5	34	0	29	chr9_128540285
chr9	128540325	128540325	10.5	10.5%_38r	chr9	128540325	MIR1268A	INTRON	34	0	0	4	38	25	0	0	0	25	4	38	0	25	chr9_128540325
chr9	128541233	128541233	6.9	6.9%_29r	chr9	128541233	MIR1268A	INTRON	27	0	0	2	29	34	0	0	0	34	2	29	0	34	chr9_128541233
chr9	128541354	128541354	6.1	6.1%_33r	chr9	128541354	MIR1268A	INTRON	31	0	0	2	33	31	0	0	0	31	2	33	0	31	chr9_128541354
chr9	128541470	128541470	6.5	6.5%_31r	chr9	128541470	MIR1268A	INTRON	29	0	0	2	31	22	0	0	0	22	2	31	0	22	chr9_128541470
chr9	128541484	128541484	12.5	12.5%_32r	chr9	128541484	MIR1268A	INTRON	28	0	0	4	32	25	0	0	0	25	4	32	0	25	chr9_128541484
chr9	128541705	128541705	11.6	11.6%_43r	chr9	128541705	MIR1268A	INTRON	38	0	0	5	43	28	0	0	0	28	5	43	0	28	chr9_128541705
chr9	128541739	128541739	14.3	14.3%_42r	chr9	128541739	MIR1268A	INTRON	36	0	0	6	42	47	0	0	0	47	6	42	0	47	chr9_128541739
chr9	128542056	128542056	12.5	12.5%_32r	chr9	128542056	MIR1268A	INTRON	28	0	0	4	32	39	0	0	0	39	4	32	0	39	chr9_128542056
chr9	128542061	128542061	9.1	9.1%_33r	chr9	128542061	MIR1268A	INTRON	30	0	0	3	33	37	0	0	0	37	3	33	0	37	chr9_128542061
chr9	128542066	128542066	6.9	6.9%_29r	chr9	128542066	MIR1268A	INTRON	27	0	0	2	29	37	0	0	0	37	2	29	0	37	chr9_128542066
chr9	128542121	128542121	13.3	13.3%_45r	chr9	128542121	MIR1268A	INTRON	39	0	0	6	45	42	0	0	0	42	6	45	0	42	chr9_128542121
chr9	128542127	128542127	9.5	9.5%_42r	chr9	128542127	MIR1268A	INTRON	38	0	0	4	42	34	0	0	0	34	4	42	0	34	chr9_128542127
chr9	128632945	128632945	13	13.0%_23r	chr9	128632945	MIR1268A	INTRON	20	0	0	3	23	16	0	0	0	16	3	23	0	16	chr9_128632945
chr9	137615579	137615579	6.2	6.2%_80r	chr9	137615579	ARRDC1-AS1	EXON	0	75	5	0	80	0	52	0	0	52	5	80	0	52	chr9_137615579
chr9	99968849	99968849	9.5	9.5%_21r	chr9	99968849	STX17	EXON	19	0	0	2	21	19	0	0	0	19	2	21	0	19	chr9_99968849
chr9	99969060	99969060	10	10.0%_20r	chr9	99969060	STX17	EXON	18	0	0	2	20	13	0	0	0	13	2	20	0	13	chr9_99969060
chr9	88462537	88462537	7.1	7.1%_28r	chr9	88462537	SPIN1	EXON	26	0	0	2	28	10	0	0	0	10	2	28	0	10	chr9_88462537
chr9	88462743	88462743	8.7	8.7%_23r	chr9	88462743	SPIN1	EXON	21	0	0	2	23	24	0	0	0	24	2	23	0	24	chr9_88462743
chr9	88475255	88475255	8.7	8.7%_23r	chr9	88475255	SPIN1	EXON	21	0	0	2	23	26	0	0	0	26	2	23	0	26	chr9_88475255
chr9	88475371	88475371	8.7	8.7%_23r	chr9	88475371	SPIN1	EXON	21	0	0	2	23	24	0	0	0	24	2	23	0	24	chr9_88475371
chr9	88475425	88475425	27.5	27.5%_40r	chr9	88475425	SPIN1	EXON	29	0	0	11	40	40	0	0	0	40	11	40	0	40	chr9_88475425
chr9	88475446	88475446	33.3	33.3%_33r	chr9	88475446	SPIN1	EXON	22	0	0	11	33	33	0	0	0	33	11	33	0	33	chr9_88475446
chr9	88475447	88475447	8.8	8.8%_34r	chr9	88475447	SPIN1	EXON	31	0	0	3	34	34	0	0	0	34	3	34	0	34	chr9_88475447
chr9	88475510	88475510	7.1	7.1%_28r	chr9	88475510	SPIN1	EXON	26	0	0	2	28	12	0	0	0	12	2	28	0	12	chr9_88475510
chr9	88475661	88475661	13.2	13.2%_38r	chr9	88475661	SPIN1	EXON	33	0	0	5	38	52	0	0	0	52	5	38	0	52	chr9_88475661
chr9	88475679	88475679	8.1	8.1%_37r	chr9	88475679	SPIN1	EXON	34	0	0	3	37	39	1	0	0	40	3	37	0	40	chr9_88475679
chr9	88475699	88475699	15.4	15.4%_26r	chr9	88475699	SPIN1	EXON	22	0	0	4	26	26	0	0	0	26	4	26	0	26	chr9_88475699
chr9	88475701	88475701	9.5	9.5%_21r	chr9	88475701	SPIN1	EXON	19	0	0	2	21	23	0	0	0	23	2	21	0	23	chr9_88475701
chr9	88475708	88475708	31.8	31.8%_22r	chr9	88475708	SPIN1	EXON	15	0	0	7	22	25	0	0	0	25	7	22	0	25	chr9_88475708
chr9	88475712	88475712	8.7	8.7%_23r	chr9	88475712	SPIN1	EXON	21	0	0	2	23	22	0	0	0	22	2	23	0	22	chr9_88475712
chr9	88476142	88476142	12.5	12.5%_32r	chr9	88476142	SPIN1	EXON	28	0	0	4	32	32	0	0	0	32	4	32	0	32	chr9_88476142
chr9	88476294	88476294	15.4	15.4%_26r	chr9	88476294	SPIN1	EXON	22	0	0	4	26	12	0	0	0	12	4	26	0	12	chr9_88476294
chr9	88476613	88476613	9.5	9.5%_21r	chr9	88476613	SPIN1	EXON	19	0	0	2	21	33	0	0	0	33	2	21	0	33	chr9_88476613
chr9	88476834	88476834	11.5	11.5%_26r	chr9	88476834	SPIN1	EXON	23	0	0	3	26	21	0	0	0	21	3	26	0	21	chr9_88476834
chr9	88476988	88476988	18.5	18.5%_27r	chr9	88476988	SPIN1	EXON	22	0	0	5	27	28	0	0	0	28	5	27	0	28	chr9_88476988
chr9	88476991	88476991	7.7	7.7%_26r	chr9	88476991	SPIN1	EXON	24	0	0	2	26	28	0	0	0	28	2	26	0	28	chr9_88476991
chr9	88477033	88477033	7.1	7.1%_28r	chr9	88477033	SPIN1	EXON	26	0	0	2	28	25	0	0	0	25	2	28	0	25	chr9_88477033
chr9	88477095	88477095	10	10.0%_20r	chr9	88477095	SPIN1	EXON	18	0	0	2	20	28	0	0	0	28	2	20	0	28	chr9_88477095
chr9	88477222	88477222	13	13.0%_23r	chr9	88477222	SPIN1	EXON	20	0	0	3	23	29	0	0	0	29	3	23	0	29	chr9_88477222
chr9	88477231	88477231	15	15.0%_20r	chr9	88477231	SPIN1	EXON	17	0	0	3	20	27	0	0	0	27	3	20	0	27	chr9_88477231
chr9	88477242	88477242	8.7	8.7%_23r	chr9	88477242	SPIN1	EXON	21	0	0	2	23	17	0	0	0	17	2	23	0	17	chr9_88477242
chr9	88477285	88477285	8.7	8.7%_23r	chr9	88477285	SPIN1	EXON	21	0	0	2	23	17	0	0	0	17	2	23	0	17	chr9_88477285
chr9	88477287	88477287	27.3	27.3%_22r	chr9	88477287	SPIN1	EXON	16	0	0	6	22	20	0	0	0	20	6	22	0	20	chr9_88477287
chr9	88477288	88477288	13.6	13.6%_22r	chr9	88477288	SPIN1	EXON	19	0	0	3	22	21	0	0	0	21	3	22	0	21	chr9_88477288
chr9	88477529	88477529	30	30.0%_20r	chr9	88477529	SPIN1	EXON	14	0	0	6	20	19	0	0	0	19	6	20	0	19	chr9_88477529
chr9	88478078	88478078	12.9	12.9%_62r	chr9	88478078	SPIN1	EXON	54	0	0	8	62	59	1	0	0	60	8	62	0	60	chr9_88478078
chr9	88478083	88478083	9.8	9.8%_61r	chr9	88478083	SPIN1	EXON	55	0	0	6	61	63	0	0	0	63	6	61	0	63	chr9_88478083
chr9	88478167	88478167	7.1	7.1%_28r	chr9	88478167	SPIN1	EXON	26	0	0	2	28	32	0	0	0	32	2	28	0	32	chr9_88478167
chr9	88478253	88478253	8.2	8.2%_98r	chr9	88478253	SPIN1	EXON	90	0	0	8	98	113	0	0	0	113	8	98	0	113	chr9_88478253
chr9	88478344	88478344	12.5	12.5%_40r	chr9	88478344	SPIN1	EXON	35	0	0	5	40	63	0	0	0	63	5	40	0	63	chr9_88478344
chr9	88478345	88478345	33.3	33.3%_39r	chr9	88478345	SPIN1	EXON	26	0	0	13	39	61	0	0	0	61	13	39	0	61	chr9_88478345
chr9	88478409	88478409	13.6	13.6%_44r	chr9	88478409	SPIN1	EXON	38	0	0	6	44	55	0	0	0	55	6	44	0	55	chr9_88478409
chr9	127806990	127806990	9.4	9.4%_32r	chr9	127806990	FPGS	EXON	29	0	0	3	32	33	0	0	0	33	3	32	0	33	chr9_127806990
chr9	127809770	127809770	6.9	6.9%_29r	chr9	127809770	FPGS	EXON	27	0	0	2	29	29	0	0	0	29	2	29	0	29	chr9_127809770
chr9	127809780	127809780	11.1	11.1%_27r	chr9	127809780	FPGS	EXON	24	0	0	3	27	24	0	0	0	24	3	27	0	24	chr9_127809780
chr9	37882517	37882517	9.4	9.4%_32r	chr9	37882517	SLC25A51	INTRON	0	29	3	0	32	0	12	0	0	12	3	32	0	12	chr9_37882517
chr9	37882740	37882740	7.1	7.1%_28r	chr9	37882740	SLC25A51	INTRON	0	26	2	0	28	0	12	0	0	12	2	28	0	12	chr9_37882740
chr9	101475410	101475410	7.4	7.4%_27r	chr9	101475410	PGAP4	EXON	0	25	2	0	27	0	24	0	0	24	2	27	0	24	chr9_101475410
chr9	101475744	101475744	6.9	6.9%_29r	chr9	101475744	PGAP4	EXON	0	27	2	0	29	0	27	0	0	27	2	29	0	27	chr9_101475744
chr9	101475782	101475782	7.7	7.7%_39r	chr9	101475782	PGAP4	EXON	0	36	3	0	39	0	35	0	0	35	3	39	0	35	chr9_101475782
chr9	101475945	101475945	6.2	6.2%_32r	chr9	101475945	PGAP4	EXON	0	30	2	0	32	0	41	0	0	41	2	32	0	41	chr9_101475945
chr9	101476020	101476020	11.8	11.8%_34r	chr9	101476020	PGAP4	EXON	0	30	4	0	34	0	33	0	0	33	4	34	0	33	chr9_101476020
chr9	32972707	32972707	11.1	11.1%_27r	chr9	32972707	APTX	EXON	0	24	3	0	27	0	20	0	0	20	3	27	0	20	chr9_32972707
chr9	32972720	32972720	20	20.0%_30r	chr9	32972720	APTX	EXON	0	24	6	0	30	0	19	0	0	19	6	30	0	19	chr9_32972720
chr9	32972900	32972900	16.7	16.7%_42r	chr9	32972900	APTX	EXON	0	35	7	0	42	0	35	0	0	35	7	42	0	35	chr9_32972900
chr9	32973141	32973141	6.2	6.2%_48r	chr9	32973141	APTX	EXON	0	45	3	0	48	0	50	0	0	50	3	48	0	50	chr9_32973141
chr9	32973451	32973451	18.6	18.6%_59r	chr9	32973451	APTX	EXON	0	48	11	0	59	0	77	0	0	77	11	59	0	77	chr9_32973451
chr9	32974468	32974468	6.6	6.6%_91r	chr9	32974468	APTX	EXON	1	84	6	0	91	0	67	0	0	67	6	91	0	67	chr9_32974468
chr9	93111901	93111901	7.4	7.4%_27r	chr9	93111901	CARD19	EXON	25	0	0	2	27	24	0	0	0	24	2	27	0	24	chr9_93111901
chr9	111934676	111934676	14.3	14.3%_35r	chr9	111934676	UGCG	EXON	30	0	0	5	35	25	0	0	0	25	5	35	0	25	chr9_111934676
chr9	111934761	111934761	10	10.0%_20r	chr9	111934761	UGCG	EXON	18	0	0	2	20	21	0	0	0	21	2	20	0	21	chr9_111934761
chr9	111934762	111934762	25	25.0%_20r	chr9	111934762	UGCG	EXON	15	0	0	5	20	21	0	0	0	21	5	20	0	21	chr9_111934762
chr9	111934798	111934798	32.1	32.1%_28r	chr9	111934798	UGCG	EXON	19	0	0	9	28	27	0	0	0	27	9	28	0	27	chr9_111934798
chr9	111934853	111934853	8.7	8.7%_46r	chr9	111934853	UGCG	EXON	42	0	0	4	46	49	0	0	0	49	4	46	0	49	chr9_111934853
chr9	111935002	111935002	6.8	6.8%_74r	chr9	111935002	UGCG	EXON	69	0	0	5	74	58	0	0	0	58	5	74	0	58	chr9_111935002
chr9	111935091	111935091	7.1	7.1%_56r	chr9	111935091	UGCG	EXON	52	0	0	4	56	45	0	0	0	45	4	56	0	45	chr9_111935091
chr9	111935156	111935156	8.8	8.8%_34r	chr9	111935156	UGCG	EXON	31	0	0	3	34	35	0	0	0	35	3	34	0	35	chr9_111935156
chr9	129094870	129094870	14.8	14.8%_27r	chr9	129094870	CRAT	EXON	0	23	4	0	27	0	26	0	0	26	4	27	0	26	chr9_129094870
chr9	129095018	129095018	8.7	8.7%_23r	chr9	129095018	CRAT	EXON	0	21	2	0	23	0	23	0	0	23	2	23	0	23	chr9_129095018
chr9	129102033	129102033	27.3	27.3%_22r	chr9	129102033	CRAT	EXON	0	16	6	0	22	0	18	0	0	18	6	22	0	18	chr9_129102033
chr9	129107851	129107851	19.2	19.2%_26r	chr9	129107851	CRAT	EXON	0	21	5	0	26	0	21	0	0	21	5	26	0	21	chr9_129107851
chr9	6506777	6506777	41.2	41.2%_34r	chr9	6506777	UHRF2	EXON	20	0	0	14	34	26	0	0	0	26	14	34	0	26	chr9_6506777
chr9	6506783	6506783	8.3	8.3%_36r	chr9	6506783	UHRF2	EXON	33	0	0	3	36	28	0	0	0	28	3	36	0	28	chr9_6506783
chr9	6506805	6506805	36.7	36.7%_30r	chr9	6506805	UHRF2	EXON	19	0	0	11	30	37	0	0	0	37	11	30	0	37	chr9_6506805
chr9	6506886	6506886	14.3	14.3%_21r	chr9	6506886	UHRF2	EXON	18	0	0	3	21	19	0	0	0	19	3	21	0	19	chr9_6506886
chr9	136672273	136672273	9.7	9.7%_31r	chr9	136672273	EGFL7	EXON	28	0	0	3	31	17	0	0	0	17	3	31	0	17	chr9_136672273
chr9	136672277	136672277	23.5	23.5%_34r	chr9	136672277	EGFL7	EXON	26	0	0	8	34	17	0	0	0	17	8	34	0	17	chr9_136672277
chr9	113387106	113387106	11.8	11.8%_34r	chr9	113387106	ALAD	EXON	0	29	4	1	34	0	18	0	0	18	4	34	0	18	chr9_113387106
chr9	113387258	113387258	9.1	9.1%_22r	chr9	113387258	ALAD	EXON	0	20	2	0	22	0	14	0	0	14	2	22	0	14	chr9_113387258
chr9	113388307	113388307	13	13.0%_23r	chr9	113388307	ALAD	EXON	0	20	3	0	23	0	10	0	0	10	3	23	0	10	chr9_113388307
chr9	113388340	113388340	8.3	8.3%_36r	chr9	113388340	ALAD	EXON	0	33	3	0	36	0	20	0	0	20	3	36	0	20	chr9_113388340
chr9	113389670	113389670	8.7	8.7%_23r	chr9	113389670	ALAD	EXON	0	21	2	0	23	0	19	0	0	19	2	23	0	19	chr9_113389670
chr9	113390407	113390407	7.1	7.1%_28r	chr9	113390407	ALAD	EXON	0	26	2	0	28	0	22	0	0	22	2	28	0	22	chr9_113390407
chr9	113390480	113390480	7.9	7.9%_38r	chr9	113390480	ALAD	EXON	1	34	3	0	38	0	24	0	0	24	3	38	0	24	chr9_113390480
chr9	113390870	113390870	8	8.0%_25r	chr9	113390870	ALAD	EXON	0	23	2	0	25	0	22	0	0	22	2	25	0	22	chr9_113390870
chr9	38406634	38406634	8.3	8.3%_36r	chr9	38406634	IGFBPL1	EXON	0	33	3	0	36	0	51	0	0	51	3	36	0	51	chr9_38406634
chr9	38406679	38406679	8	8.0%_25r	chr9	38406679	IGFBPL1	EXON	0	23	2	0	25	0	52	0	0	52	2	25	0	52	chr9_38406679
chr9	38406856	38406856	12.2	12.2%_41r	chr9	38406856	IGFBPL1	EXON	0	36	5	0	41	0	57	0	0	57	5	41	0	57	chr9_38406856
chr9	38406917	38406917	33.3	33.3%_24r	chr9	38406917	IGFBPL1	EXON	0	16	8	0	24	0	30	0	0	30	8	24	0	30	chr9_38406917
chr9	38407349	38407349	30.2	30.2%_43r	chr9	38407349	IGFBPL1	EXON	0	30	13	0	43	0	50	0	0	50	13	43	0	50	chr9_38407349
chr9	38407664	38407664	18.5	18.5%_92r	chr9	38407664	IGFBPL1	EXON	0	74	17	1	92	0	101	0	0	101	17	92	0	101	chr9_38407664
chr9	38407745	38407745	20	20.0%_50r	chr9	38407745	IGFBPL1	EXON	0	40	10	0	50	0	41	0	0	41	10	50	0	41	chr9_38407745
chr9	38407762	38407762	23.4	23.4%_47r	chr9	38407762	IGFBPL1	EXON	0	36	11	0	47	0	54	0	0	54	11	47	0	54	chr9_38407762
chr9	38407763	38407763	15.6	15.6%_45r	chr9	38407763	IGFBPL1	EXON	0	38	7	0	45	0	55	0	0	55	7	45	0	55	chr9_38407763
chr9	38408019	38408019	25.5	25.5%_55r	chr9	38408019	IGFBPL1	EXON	0	41	14	0	55	0	44	0	0	44	14	55	0	44	chr9_38408019
chr9	38408100	38408100	6	6.0%_50r	chr9	38408100	IGFBPL1	EXON	0	47	3	0	50	0	55	0	0	55	3	50	0	55	chr9_38408100
chr9	38408155	38408155	6.1	6.1%_33r	chr9	38408155	IGFBPL1	EXON	0	31	2	0	33	0	36	0	0	36	2	33	0	36	chr9_38408155
chr9	104747834	104747834	6.9	6.9%_29r	chr9	104747834	NIPSNAP3A	EXON	27	0	0	2	29	12	0	0	0	12	2	29	0	12	chr9_104747834
chr9	35732850	35732850	7.1	7.1%_28r	chr9	35732850	CREB3	EXON	26	0	0	2	28	33	0	0	0	33	2	28	0	33	chr9_35732850
chr9	35733041	35733041	6.3	6.3%_63r	chr9	35733041	CREB3	EXON	59	0	0	4	63	50	0	0	0	50	4	63	0	50	chr9_35733041
chr9	35733445	35733445	10.4	10.4%_77r	chr9	35733445	CREB3	EXON	68	0	1	8	77	72	0	0	0	72	8	77	0	72	chr9_35733445
chr9	35736803	35736803	9.1	9.1%_33r	chr9	35736803	CREB3	EXON	30	0	0	3	33	38	0	0	0	38	3	33	0	38	chr9_35736803
chr9	36150914	36150914	9.7	9.7%_31r	chr9	36150914	GLIPR2	EXON	28	0	0	3	31	33	0	0	0	33	3	31	0	33	chr9_36150914
chr9	36162413	36162413	11.8	11.8%_34r	chr9	36162413	GLIPR2	EXON	30	0	0	4	34	32	0	0	0	32	4	34	0	32	chr9_36162413
chr9	36162470	36162470	7.4	7.4%_27r	chr9	36162470	GLIPR2	EXON	25	0	0	2	27	22	0	0	0	22	2	27	0	22	chr9_36162470
chr9	36162518	36162518	8	8.0%_25r	chr9	36162518	GLIPR2	EXON	23	0	0	2	25	18	0	0	0	18	2	25	0	18	chr9_36162518
chr9	36162620	36162620	19.5	19.5%_41r	chr9	36162620	GLIPR2	EXON	33	0	0	8	41	44	0	0	0	44	8	41	0	44	chr9_36162620
chr9	36162658	36162658	7.8	7.8%_51r	chr9	36162658	GLIPR2	EXON	47	0	0	4	51	32	0	0	0	32	4	51	0	32	chr9_36162658
chr9	36162674	36162674	16.7	16.7%_42r	chr9	36162674	GLIPR2	EXON	35	0	0	7	42	31	0	0	0	31	7	42	0	31	chr9_36162674
chr9	36162872	36162872	9.1	9.1%_22r	chr9	36162872	GLIPR2	EXON	20	0	0	2	22	16	0	0	0	16	2	22	0	16	chr9_36162872
chr9	35089394	35089394	9.5	9.5%_21r	chr9	35089394	PIGO	EXON	0	19	2	0	21	0	18	0	0	18	2	21	0	18	chr9_35089394
chr9	33110737	33110737	7.1	7.1%_225r	chr9	33110737	B4GALT1	EXON	0	209	16	0	225	0	171	0	0	171	16	225	0	171	chr9_33110737
chr9	33110798	33110798	8.6	8.6%_163r	chr9	33110798	B4GALT1	EXON	0	149	14	0	163	0	183	0	0	183	14	163	0	183	chr9_33110798
chr9	33110824	33110824	31.3	31.3%_99r	chr9	33110824	B4GALT1	EXON	0	68	31	0	99	0	99	0	0	99	31	99	0	99	chr9_33110824
chr9	33110875	33110875	6.5	6.5%_124r	chr9	33110875	B4GALT1	EXON	0	116	8	0	124	0	121	0	0	121	8	124	0	121	chr9_33110875
chr9	33110897	33110897	7.7	7.7%_168r	chr9	33110897	B4GALT1	EXON	0	154	13	1	168	0	186	0	0	186	13	168	0	186	chr9_33110897
chr9	33110907	33110907	14.1	14.1%_163r	chr9	33110907	B4GALT1	EXON	0	140	23	0	163	0	211	0	0	211	23	163	0	211	chr9_33110907
chr9	33110932	33110932	14.4	14.4%_180r	chr9	33110932	B4GALT1	EXON	0	154	26	0	180	0	181	0	0	181	26	180	0	181	chr9_33110932
chr9	33110933	33110933	7.2	7.2%_181r	chr9	33110933	B4GALT1	EXON	0	168	13	0	181	0	182	0	0	182	13	181	0	182	chr9_33110933
chr9	33111039	33111039	27.8	27.8%_115r	chr9	33111039	B4GALT1	EXON	1	82	32	0	115	0	109	0	0	109	32	115	0	109	chr9_33111039
chr9	33111046	33111046	6.2	6.2%_113r	chr9	33111046	B4GALT1	EXON	0	106	7	0	113	0	109	0	0	109	7	113	0	109	chr9_33111046
chr9	33111122	33111122	18.2	18.2%_154r	chr9	33111122	B4GALT1	EXON	0	126	28	0	154	0	154	0	0	154	28	154	0	154	chr9_33111122
chr9	33111195	33111195	52.3	52.3%_199r	chr9	33111195	B4GALT1	EXON	0	95	104	0	199	0	211	0	0	211	104	199	0	211	chr9_33111195
chr9	33111197	33111197	9.8	9.8%_215r	chr9	33111197	B4GALT1	EXON	0	194	21	0	215	0	235	0	0	235	21	215	0	235	chr9_33111197
chr9	124876898	124876898	10.9	10.9%_128r	chr9	124876898	ARPC5L	EXON	114	0	0	14	128	120	1	0	0	121	14	128	0	121	chr9_124876898
chr9	124877027	124877027	9.3	9.3%_97r	chr9	124877027	ARPC5L	EXON	88	0	0	9	97	102	0	0	0	102	9	97	0	102	chr9_124877027
chr9	124877099	124877099	12.8	12.8%_86r	chr9	124877099	ARPC5L	EXON	75	0	0	11	86	85	0	0	0	85	11	86	0	85	chr9_124877099
chr9	124877135	124877135	19	19.0%_79r	chr9	124877135	ARPC5L	EXON	64	0	0	15	79	95	0	0	0	95	15	79	0	95	chr9_124877135
chr9	124877158	124877158	34.9	34.9%_83r	chr9	124877158	ARPC5L	EXON	54	0	0	29	83	78	1	0	0	79	29	83	0	79	chr9_124877158
chr9	124877226	124877226	27.9	27.9%_104r	chr9	124877226	ARPC5L	EXON	75	0	0	29	104	122	0	0	0	122	29	104	0	122	chr9_124877226
chr9	124877262	124877262	7.1	7.1%_85r	chr9	124877262	ARPC5L	EXON	79	0	0	6	85	71	0	0	0	71	6	85	0	71	chr9_124877262
chr9	124877313	124877313	7.6	7.6%_66r	chr9	124877313	ARPC5L	EXON	61	0	0	5	66	65	0	0	0	65	5	66	0	65	chr9_124877313
chr9	124877346	124877346	11.9	11.9%_109r	chr9	124877346	ARPC5L	EXON	96	0	0	13	109	86	1	0	0	87	13	109	0	87	chr9_124877346
chr9	124877393	124877393	7.8	7.8%_90r	chr9	124877393	ARPC5L	EXON	83	0	0	7	90	82	0	0	0	82	7	90	0	82	chr9_124877393
chr9	124877517	124877517	8.3	8.3%_24r	chr9	124877517	ARPC5L	EXON	22	0	0	2	24	20	0	0	0	20	2	24	0	20	chr9_124877517
chr9	124877603	124877603	21.7	21.7%_23r	chr9	124877603	ARPC5L	EXON	18	0	0	5	23	26	0	0	0	26	5	23	0	26	chr9_124877603
chr9	124877619	124877619	19.2	19.2%_26r	chr9	124877619	ARPC5L	EXON	21	0	0	5	26	31	0	0	0	31	5	26	0	31	chr9_124877619
chr9	124877621	124877621	12.5	12.5%_24r	chr9	124877621	ARPC5L	EXON	21	0	0	3	24	33	0	0	0	33	3	24	0	33	chr9_124877621
chr9	124877623	124877623	9.1	9.1%_22r	chr9	124877623	ARPC5L	EXON	20	0	0	2	22	27	0	0	0	27	2	22	0	27	chr9_124877623
chr9	133057851	133057851	11.1	11.1%_108r	chr9	133057851	GTF3C5	EXON	96	0	0	12	108	94	0	0	0	94	12	108	0	94	chr9_133057851
chr9	133057878	133057878	34.1	34.1%_82r	chr9	133057878	GTF3C5	EXON	53	1	0	28	82	93	1	0	0	94	28	82	0	94	chr9_133057878
chr9	133058407	133058407	9.1	9.1%_55r	chr9	133058407	GTF3C5	EXON	50	0	0	5	55	48	0	0	0	48	5	55	0	48	chr9_133058407
chr9	128633874	128633874	10.9	10.9%_101r	chr9	128633874	DYNC2I2	EXON	0	90	11	0	101	0	81	0	0	81	11	101	0	81	chr9_128633874
chr9	128633898	128633898	28.8	28.8%_66r	chr9	128633898	DYNC2I2	EXON	0	47	19	0	66	0	79	0	0	79	19	66	0	79	chr9_128633898
chr9	128636409	128636409	8.7	8.7%_127r	chr9	128636409	DYNC2I2	EXON	0	116	11	0	127	0	109	0	0	109	11	127	0	109	chr9_128636409
chr9	137189159	137189159	10.1	10.1%_69r	chr9	137189159	SSNA1	EXON	62	0	0	7	69	47	0	0	0	47	7	69	0	47	chr9_137189159
chr9	137189859	137189859	8.5	8.5%_118r	chr9	137189859	SSNA1	EXON	107	0	1	10	118	91	0	2	0	93	10	118	0	93	chr9_137189859
chr9	134141518	134141518	10	10.0%_20r	chr9	134141518	WDR5	EXON	18	0	0	2	20	15	0	0	0	15	2	20	0	15	chr9_134141518
chr9	134141963	134141963	9.5	9.5%_21r	chr9	134141963	WDR5	EXON	19	0	0	2	21	24	0	0	0	24	2	21	0	24	chr9_134141963
chr9	134156592	134156592	6.1	6.1%_33r	chr9	134156592	WDR5	EXON	31	0	0	2	33	34	0	0	0	34	2	33	0	34	chr9_134156592
chr9	134158047	134158047	25.9	25.9%_27r	chr9	134158047	WDR5	EXON	20	0	0	7	27	29	0	0	0	29	7	27	0	29	chr9_134158047
chr9	134158049	134158049	7.1	7.1%_28r	chr9	134158049	WDR5	EXON	26	0	0	2	28	29	0	0	0	29	2	28	0	29	chr9_134158049
chr9	134158051	134158051	7.1	7.1%_28r	chr9	134158051	WDR5	EXON	26	0	0	2	28	29	0	0	0	29	2	28	0	29	chr9_134158051
chr9	92297837	92297837	9.1	9.1%_22r	chr9	92297837	NOL8	EXON	0	20	2	0	22	0	13	0	0	13	2	22	0	13	chr9_92297837
chr9	92298904	92298904	7.1	7.1%_28r	chr9	92298904	NOL8	EXON	0	26	2	0	28	0	18	0	0	18	2	28	0	18	chr9_92298904
chr9	92298933	92298933	12	12.0%_25r	chr9	92298933	NOL8	EXON	0	22	3	0	25	0	10	0	0	10	3	25	0	10	chr9_92298933
chr9	92314897	92314897	10	10.0%_50r	chr9	92314897	NOL8	EXON	0	45	5	0	50	0	35	0	0	35	5	50	0	35	chr9_92314897
chr9	92315721	92315721	6.1	6.1%_33r	chr9	92315721	NOL8	EXON	0	31	2	0	33	0	38	0	0	38	2	33	0	38	chr9_92315721
chr9	92324156	92324156	7.1	7.1%_56r	chr9	92324156	NOL8	EXON	0	52	4	0	56	0	44	0	0	44	4	56	0	44	chr9_92324156
chr9	136412870	136412870	7.1	7.1%_112r	chr9	136412870	PMPCA	EXON	104	0	0	8	112	116	0	0	0	116	8	112	0	116	chr9_136412870
chr9	136416367	136416367	6.2	6.2%_113r	chr9	136416367	PMPCA	EXON	106	0	0	7	113	99	0	0	0	99	7	113	0	99	chr9_136416367
chr9	136423290	136423290	11.8	11.8%_93r	chr9	136423290	PMPCA	EXON	82	0	0	11	93	82	0	0	0	82	11	93	0	82	chr9_136423290
chr9	136423326	136423326	9.3	9.3%_107r	chr9	136423326	PMPCA	EXON	97	0	0	10	107	93	0	0	0	93	10	107	0	93	chr9_136423326
chr9	33971717	33971717	12	12.0%_25r	chr9	33971717	UBAP2	EXON	0	22	3	0	25	0	19	0	0	19	3	25	0	19	chr9_33971717
chr9	105705694	105705694	8.2	8.2%_49r	chr9	105705694	TMEM38B	EXON	45	0	0	4	49	47	0	0	0	47	4	49	0	47	chr9_105705694
chr9	105721567	105721567	8.8	8.8%_34r	chr9	105721567	TMEM38B	EXON	31	0	0	3	34	38	0	0	0	38	3	34	0	38	chr9_105721567
chr9	105721702	105721702	22.4	22.4%_49r	chr9	105721702	TMEM38B	EXON	38	0	0	11	49	45	0	0	0	45	11	49	0	45	chr9_105721702
chr9	105722612	105722612	6.5	6.5%_46r	chr9	105722612	TMEM38B	EXON	43	0	0	3	46	42	0	0	0	42	3	46	0	42	chr9_105722612
chr9	105774029	105774029	9.7	9.7%_31r	chr9	105774029	TMEM38B	EXON	28	0	0	3	31	28	0	0	0	28	3	31	0	28	chr9_105774029
chr9	105774099	105774099	15.6	15.6%_32r	chr9	105774099	TMEM38B	EXON	27	0	0	5	32	23	0	0	0	23	5	32	0	23	chr9_105774099
chr9	105774371	105774371	7.7	7.7%_26r	chr9	105774371	TMEM38B	EXON	24	0	0	2	26	11	0	0	0	11	2	26	0	11	chr9_105774371
chr9	105774646	105774646	11.5	11.5%_26r	chr9	105774646	TMEM38B	EXON	23	0	0	3	26	27	0	0	0	27	3	26	0	27	chr9_105774646
chr9	105775044	105775044	6.9	6.9%_29r	chr9	105775044	TMEM38B	EXON	27	0	0	2	29	20	0	0	0	20	2	29	0	20	chr9_105775044
chr9	105775067	105775067	15.4	15.4%_26r	chr9	105775067	TMEM38B	EXON	22	0	0	4	26	24	0	0	0	24	4	26	0	24	chr9_105775067
chr9	105775134	105775134	21.7	21.7%_23r	chr9	105775134	TMEM38B	EXON	18	0	0	5	23	20	0	0	0	20	5	23	0	20	chr9_105775134
chr9	105775135	105775135	21.7	21.7%_23r	chr9	105775135	TMEM38B	EXON	18	0	0	5	23	18	0	0	0	18	5	23	0	18	chr9_105775135
chr9	105775261	105775261	6.1	6.1%_33r	chr9	105775261	TMEM38B	EXON	31	0	0	2	33	19	0	0	0	19	2	33	0	19	chr9_105775261
chr9	129804293	129804293	7.4	7.4%_27r	chr9	129804293	TOR1B	EXON	25	0	0	2	27	21	0	0	0	21	2	27	0	21	chr9_129804293
chr9	129804334	129804334	11.1	11.1%_27r	chr9	129804334	TOR1B	EXON	24	0	0	3	27	19	0	0	0	19	3	27	0	19	chr9_129804334
chr9	129810561	129810561	19	19.0%_21r	chr9	129810561	TOR1B	EXON	17	0	0	4	21	12	0	0	0	12	4	21	0	12	chr9_129810561
chr9	129810902	129810902	10	10.0%_20r	chr9	129810902	TOR1B	EXON	18	0	0	2	20	20	0	0	0	20	2	20	0	20	chr9_129810902
chr9	129810923	129810923	9.1	9.1%_22r	chr9	129810923	TOR1B	EXON	20	0	0	2	22	20	0	0	0	20	2	22	0	20	chr9_129810923
chr9	132402401	132402401	10	10.0%_30r	chr9	132402401	TTF1	EXON	0	27	3	0	30	0	33	0	0	33	3	30	0	33	chr9_132402401
chr9	15444670	15444670	11.1	11.1%_54r	chr9	15444670	SNAPC3	EXON	48	0	0	6	54	32	0	0	0	32	6	54	0	32	chr9_15444670
chr9	15447223	15447223	8.8	8.8%_34r	chr9	15447223	SNAPC3	EXON	31	0	0	3	34	34	0	0	0	34	3	34	0	34	chr9_15447223
chr9	15453192	15453192	9.4	9.4%_53r	chr9	15453192	SNAPC3	EXON	48	0	0	5	53	42	0	0	0	42	5	53	0	42	chr9_15453192
chr9	15459733	15459733	13.3	13.3%_30r	chr9	15459733	SNAPC3	EXON	26	0	0	4	30	24	0	0	0	24	4	30	0	24	chr9_15459733
chr9	33026959	33026959	15.4	15.4%_382r	chr9	33026959	DNAJA1	EXON	323	0	0	59	382	391	0	0	0	391	59	382	0	391	chr9_33026959
chr9	33029919	33029919	21.5	21.5%_772r	chr9	33029919	DNAJA1	EXON	605	1	0	166	772	786	0	0	0	786	166	772	0	786	chr9_33029919
chr9	33030486	33030486	8.6	8.6%_626r	chr9	33030486	DNAJA1	EXON	572	0	0	54	626	580	0	0	0	580	54	626	0	580	chr9_33030486
chr9	33030566	33030566	6.1	6.1%_726r	chr9	33030566	DNAJA1	EXON	682	0	0	44	726	732	1	0	1	734	44	726	1	734	chr9_33030566
chr9	33034287	33034287	47.7	47.7%_745r	chr9	33034287	DNAJA1	EXON	390	0	0	355	745	816	0	0	0	816	355	745	0	816	chr9_33034287
chr9	33034290	33034290	15.8	15.8%_778r	chr9	33034290	DNAJA1	EXON	654	1	0	123	778	863	1	0	0	864	123	778	0	864	chr9_33034290
chr9	33037034	33037034	10.2	10.2%_1033r	chr9	33037034	DNAJA1	EXON	928	0	0	105	1033	951	0	0	0	951	105	1033	0	951	chr9_33037034
chr9	33038822	33038822	36.6	36.6%_607r	chr9	33038822	DNAJA1	EXON	381	3	1	222	607	624	0	0	0	624	222	607	0	624	chr9_33038822
chr9	33038823	33038823	8.2	8.2%_598r	chr9	33038823	DNAJA1	EXON	540	1	8	49	598	573	1	19	1	594	49	598	1	594	chr9_33038823
chr9	33038952	33038952	31.7	31.7%_789r	chr9	33038952	DNAJA1	EXON	539	0	0	250	789	809	0	0	0	809	250	789	0	809	chr9_33038952
chr9	33039135	33039135	11.5	11.5%_104r	chr9	33039135	DNAJA1	EXON	92	0	0	12	104	78	0	0	0	78	12	104	0	78	chr9_33039135
chr9	33039147	33039147	10.4	10.4%_96r	chr9	33039147	DNAJA1	EXON	86	0	0	10	96	82	0	0	0	82	10	96	0	82	chr9_33039147
chr9	33039161	33039161	19.5	19.5%_82r	chr9	33039161	DNAJA1	EXON	66	0	0	16	82	82	0	0	0	82	16	82	0	82	chr9_33039161
chr9	33039163	33039163	14	14.0%_86r	chr9	33039163	DNAJA1	EXON	74	0	0	12	86	86	0	0	0	86	12	86	0	86	chr9_33039163
chr9	33039171	33039171	7.4	7.4%_108r	chr9	33039171	DNAJA1	EXON	100	0	0	8	108	99	0	0	0	99	8	108	0	99	chr9_33039171
chr9	33039197	33039197	9.5	9.5%_168r	chr9	33039197	DNAJA1	EXON	151	0	1	16	168	167	0	0	0	167	16	168	0	167	chr9_33039197
chr9	33039202	33039202	65.1	65.1%_172r	chr9	33039202	DNAJA1	EXON	60	0	0	112	172	197	0	0	0	197	112	172	0	197	chr9_33039202
chr9	33039215	33039215	55.2	55.2%_174r	chr9	33039215	DNAJA1	EXON	77	1	0	96	174	196	1	0	0	197	96	174	0	197	chr9_33039215
chr9	33039283	33039283	24.6	24.6%_57r	chr9	33039283	DNAJA1	EXON	43	0	0	14	57	63	0	0	0	63	14	57	0	63	chr9_33039283
chr9	33039293	33039293	7.1	7.1%_42r	chr9	33039293	DNAJA1	EXON	39	0	0	3	42	47	0	0	0	47	3	42	0	47	chr9_33039293
chr9	33039643	33039643	15.6	15.6%_32r	chr9	33039643	DNAJA1	EXON	27	0	0	5	32	22	0	0	0	22	5	32	0	22	chr9_33039643
chr9	33039645	33039645	9.7	9.7%_31r	chr9	33039645	DNAJA1	EXON	28	0	0	3	31	22	0	0	0	22	3	31	0	22	chr9_33039645
chr9	33039659	33039659	9.8	9.8%_41r	chr9	33039659	DNAJA1	EXON	36	1	0	4	41	33	0	0	0	33	4	41	0	33	chr9_33039659
chr9	33039660	33039660	16.3	16.3%_43r	chr9	33039660	DNAJA1	EXON	36	0	0	7	43	34	0	0	0	34	7	43	0	34	chr9_33039660
chr9	33039669	33039669	24.4	24.4%_45r	chr9	33039669	DNAJA1	EXON	34	0	0	11	45	32	0	0	0	32	11	45	0	32	chr9_33039669
chr9	33039780	33039780	6.6	6.6%_61r	chr9	33039780	DNAJA1	EXON	57	0	0	4	61	32	0	0	0	32	4	61	0	32	chr9_33039780
chr9	33039832	33039832	25.6	25.6%_43r	chr9	33039832	DNAJA1	EXON	32	0	0	11	43	29	0	0	0	29	11	43	0	29	chr9_33039832
chr9	33039852	33039852	7.8	7.8%_51r	chr9	33039852	DNAJA1	EXON	47	0	0	4	51	58	0	1	0	59	4	51	0	59	chr9_33039852
chr9	77717443	77717443	13.6	13.6%_22r	chr9	77717443	GNAQ	EXON	0	19	3	0	22	0	15	0	0	15	3	22	0	15	chr9_77717443
chr9	109436908	109436908	50	50.0%_20r	chr9	109436908	PTPN3	EXON	0	10	10	0	20	0	22	0	0	22	10	20	0	22	chr9_109436908
chr9	69072829	69072829	8.2	8.2%_61r	chr9	69072829	FXN	EXON	56	0	0	5	61	57	0	0	0	57	5	61	0	57	chr9_69072829
chr9	83661170	83661170	9.5	9.5%_21r	chr9	83661170	UBQLN1	EXON	0	19	2	0	21	0	16	0	0	16	2	21	0	16	chr9_83661170
chr9	83663994	83663994	8.8	8.8%_57r	chr9	83663994	UBQLN1	EXON	0	52	5	0	57	0	45	0	0	45	5	57	0	45	chr9_83663994
chr9	83677787	83677787	24.2	24.2%_66r	chr9	83677787	UBQLN1	EXON	0	50	16	0	66	0	58	0	0	58	16	66	0	58	chr9_83677787
chr9	83707800	83707800	6.1	6.1%_33r	chr9	83707800	UBQLN1	EXON	0	31	2	0	33	0	30	0	0	30	2	33	0	30	chr9_83707800
chr9	36337057	36337057	8.3	8.3%_24r	chr9	36337057	RNF38	EXON	0	22	2	0	24	0	32	0	0	32	2	24	0	32	chr9_36337057
chr9	36337126	36337126	32	32.0%_25r	chr9	36337126	RNF38	EXON	0	17	8	0	25	0	18	0	0	18	8	25	0	18	chr9_36337126
chr9	36337184	36337184	50	50.0%_22r	chr9	36337184	RNF38	EXON	0	11	11	0	22	0	22	0	0	22	11	22	0	22	chr9_36337184
chr9	36337214	36337214	6.7	6.7%_30r	chr9	36337214	RNF38	EXON	0	28	2	0	30	0	29	0	0	29	2	30	0	29	chr9_36337214
chr9	36337256	36337256	9.3	9.3%_43r	chr9	36337256	RNF38	EXON	0	39	4	0	43	0	37	0	0	37	4	43	0	37	chr9_36337256
chr9	36337331	36337331	11.1	11.1%_27r	chr9	36337331	RNF38	EXON	0	24	3	0	27	0	16	0	0	16	3	27	0	16	chr9_36337331
chr9	36337946	36337946	8.3	8.3%_24r	chr9	36337946	RNF38	EXON	0	22	2	0	24	0	10	0	0	10	2	24	0	10	chr9_36337946
chr9	36338055	36338055	18.2	18.2%_22r	chr9	36338055	RNF38	EXON	0	18	4	0	22	0	15	0	0	15	4	22	0	15	chr9_36338055
chr9	36338134	36338134	9.5	9.5%_21r	chr9	36338134	RNF38	EXON	0	19	2	0	21	0	25	0	0	25	2	21	0	25	chr9_36338134
chr9	36338340	36338340	10	10.0%_20r	chr9	36338340	RNF38	EXON	0	18	2	0	20	0	17	0	0	17	2	20	0	17	chr9_36338340
chr9	36338471	36338471	7.4	7.4%_27r	chr9	36338471	RNF38	EXON	0	25	2	0	27	0	18	0	0	18	2	27	0	18	chr9_36338471
chr9	4711621	4711621	15	15.0%_20r	chr9	4711621	AK3	EXON	0	17	3	0	20	0	15	0	0	15	3	20	0	15	chr9_4711621
chr9	4712313	4712313	9.1	9.1%_22r	chr9	4712313	AK3	EXON	0	20	2	0	22	0	17	0	0	17	2	22	0	17	chr9_4712313
chr9	4719164	4719164	7.6	7.6%_66r	chr9	4719164	AK3	EXON	0	61	5	0	66	0	54	0	0	54	5	66	0	54	chr9_4719164
chr9	37588606	37588606	6.4	6.4%_235r	chr9	37588606	TOMM5	EXON	0	220	15	0	235	0	191	0	0	191	15	235	0	191	chr9_37588606
chr9	37588805	37588805	6.2	6.2%_353r	chr9	37588805	TOMM5	EXON	0	331	22	0	353	0	329	0	0	329	22	353	0	329	chr9_37588805
chr9	37588814	37588814	10.4	10.4%_345r	chr9	37588814	TOMM5	EXON	1	308	36	0	345	0	325	0	0	325	36	345	0	325	chr9_37588814
chr9	37588815	37588815	22	22.0%_350r	chr9	37588815	TOMM5	EXON	0	273	77	0	350	0	351	0	0	351	77	350	0	351	chr9_37588815
chr9	78304735	78304735	13.8	13.8%_203r	chr9	78304735	PSAT1	EXON	175	0	0	28	203	198	0	0	0	198	28	203	0	198	chr9_78304735
chr9	78306348	78306348	6	6.0%_364r	chr9	78306348	PSAT1	EXON	341	1	0	22	364	365	0	0	0	365	22	364	0	365	chr9_78306348
chr9	78306359	78306359	6.2	6.2%_481r	chr9	78306359	PSAT1	EXON	450	0	1	30	481	468	0	1	0	469	30	481	0	469	chr9_78306359
chr9	78306466	78306466	6.7	6.7%_270r	chr9	78306466	PSAT1	EXON	252	0	0	18	270	259	0	0	0	259	18	270	0	259	chr9_78306466
chr9	78306471	78306471	10	10.0%_260r	chr9	78306471	PSAT1	EXON	234	0	0	26	260	249	0	0	0	249	26	260	0	249	chr9_78306471
chr9	78308582	78308582	7.8	7.8%_374r	chr9	78308582	PSAT1	EXON	345	0	0	29	374	378	0	0	0	378	29	374	0	378	chr9_78308582
chr9	129129055	129129055	6	6.0%_50r	chr9	129129055	PTPA	EXON	47	0	0	3	50	33	0	0	0	33	3	50	0	33	chr9_129129055
chr9	129131592	129131592	6	6.0%_50r	chr9	129131592	PTPA	EXON	47	0	0	3	50	33	0	0	0	33	3	50	0	33	chr9_129131592
chr9	6011703	6011703	18.2	18.2%_22r	chr9	6011703	RANBP6	EXON	0	18	4	0	22	0	20	0	0	20	4	22	0	20	chr9_6011703
chr9	6011704	6011704	8.3	8.3%_24r	chr9	6011704	RANBP6	EXON	0	22	2	0	24	0	20	0	0	20	2	24	0	20	chr9_6011704
chr9	6011842	6011842	13	13.0%_23r	chr9	6011842	RANBP6	EXON	0	20	3	0	23	0	15	0	0	15	3	23	0	15	chr9_6011842
chr9	6013097	6013097	9.1	9.1%_22r	chr9	6013097	RANBP6	EXON	0	20	2	0	22	0	24	0	0	24	2	22	0	24	chr9_6013097
chr9	6013255	6013255	7.7	7.7%_26r	chr9	6013255	RANBP6	EXON	0	24	2	0	26	0	25	0	0	25	2	26	0	25	chr9_6013255
chr9	6014015	6014015	7.1	7.1%_28r	chr9	6014015	RANBP6	EXON	0	26	2	0	28	0	16	0	0	16	2	28	0	16	chr9_6014015
chr9	6014020	6014020	7.1	7.1%_28r	chr9	6014020	RANBP6	EXON	0	26	2	0	28	0	21	0	0	21	2	28	0	21	chr9_6014020
chr9	6014117	6014117	9.1	9.1%_22r	chr9	6014117	RANBP6	EXON	0	20	2	0	22	0	23	0	0	23	2	22	0	23	chr9_6014117
chr9	6014993	6014993	6.9	6.9%_29r	chr9	6014993	RANBP6	EXON	0	27	2	0	29	0	20	0	0	20	2	29	0	20	chr9_6014993
chr9	89377834	89377834	20	20.0%_20r	chr9	89377834	SEMA4D	EXON	0	16	4	0	20	0	13	0	0	13	4	20	0	13	chr9_89377834
chr9	111669937	111669937	7.4	7.4%_27r	chr9	111669937	GNG10	EXON	25	0	0	2	27	16	0	0	0	16	2	27	0	16	chr9_111669937
chr9	78240137	78240137	6.2	6.2%_48r	chr9	78240137	CEP78	EXON	45	0	0	3	48	51	0	0	0	51	3	48	0	51	chr9_78240137
chr9	78246711	78246711	6.7	6.7%_45r	chr9	78246711	CEP78	EXON	42	0	0	3	45	36	0	0	0	36	3	45	0	36	chr9_78246711
chr9	113374349	113374349	26.5	26.5%_34r	chr9	113374349	HDHD3	EXON	0	25	9	0	34	0	21	0	0	21	9	34	0	21	chr9_113374349
chr9	113374424	113374424	8.9	8.9%_45r	chr9	113374424	HDHD3	EXON	0	41	4	0	45	0	33	0	0	33	4	45	0	33	chr9_113374424
chr9	121310709	121310709	9.5	9.5%_21r	chr9	121310709	GSN	EXON	19	0	0	2	21	10	0	0	0	10	2	21	0	10	chr9_121310709
chr9	121313947	121313947	13.6	13.6%_22r	chr9	121313947	GSN	EXON	19	0	0	3	22	15	0	0	0	15	3	22	0	15	chr9_121313947
chr9	121318833	121318833	8	8.0%_25r	chr9	121318833	GSN	EXON	23	0	0	2	25	19	0	0	0	19	2	25	0	19	chr9_121318833
chr9	111669937	111669937	7.4	7.4%_27r	chr9	111669937	DNAJC25-GNG10	EXON	25	0	0	2	27	16	0	0	0	16	2	27	0	16	chr9_111669937
chr9	40992433	40992433	23.1	23.1%_26r	chr9	40992433	FAM74A1	INTRON	20	0	0	6	26	20	0	0	0	20	6	26	0	20	chr9_40992433
chr9	32542156	32542156	10	10.0%_20r	chr9	32542156	TOPORS	EXON	0	18	2	0	20	0	21	0	0	21	2	20	0	21	chr9_32542156
chr9	32542331	32542331	45	45.0%_40r	chr9	32542331	TOPORS	EXON	0	22	18	0	40	0	45	0	0	45	18	40	0	45	chr9_32542331
chr9	32542934	32542934	6.5	6.5%_46r	chr9	32542934	TOPORS	EXON	0	43	3	0	46	0	40	0	0	40	3	46	0	40	chr9_32542934
chr9	32542946	32542946	12.5	12.5%_32r	chr9	32542946	TOPORS	EXON	0	28	4	0	32	0	28	0	0	28	4	32	0	28	chr9_32542946
chr9	108943735	108943735	6.6	6.6%_91r	chr9	108943735	CTNNAL1	EXON	0	85	6	0	91	0	70	0	0	70	6	91	0	70	chr9_108943735
chr9	108943977	108943977	14.8	14.8%_54r	chr9	108943977	CTNNAL1	EXON	0	46	8	0	54	0	45	0	0	45	8	54	0	45	chr9_108943977
chr9	108943991	108943991	7.1	7.1%_56r	chr9	108943991	CTNNAL1	EXON	0	52	4	0	56	0	46	0	0	46	4	56	0	46	chr9_108943991
chr9	108948215	108948215	7.7	7.7%_91r	chr9	108948215	CTNNAL1	EXON	0	84	7	0	91	0	86	0	0	86	7	91	0	86	chr9_108948215
chr9	108952359	108952359	6.8	6.8%_73r	chr9	108952359	CTNNAL1	EXON	0	68	5	0	73	0	69	0	0	69	5	73	0	69	chr9_108952359
chr9	108965477	108965477	8.8	8.8%_57r	chr9	108965477	CTNNAL1	EXON	0	52	5	0	57	0	69	0	0	69	5	57	0	69	chr9_108965477
chr9	108976978	108976978	6.1	6.1%_114r	chr9	108976978	CTNNAL1	EXON	0	107	7	0	114	0	100	0	0	100	7	114	0	100	chr9_108976978
chr9	108979355	108979355	8.1	8.1%_111r	chr9	108979355	CTNNAL1	EXON	0	102	9	0	111	0	103	0	0	103	9	111	0	103	chr9_108979355
chr9	108983296	108983296	34.6	34.6%_81r	chr9	108983296	CTNNAL1	EXON	0	53	28	0	81	0	85	0	0	85	28	81	0	85	chr9_108983296
chr9	108983297	108983297	14.5	14.5%_83r	chr9	108983297	CTNNAL1	EXON	0	71	12	0	83	0	94	0	0	94	12	83	0	94	chr9_108983297
chr9	108984394	108984394	7.5	7.5%_67r	chr9	108984394	CTNNAL1	EXON	0	62	5	0	67	0	56	0	0	56	5	67	0	56	chr9_108984394
chr9	108990769	108990769	20	20.0%_80r	chr9	108990769	CTNNAL1	EXON	0	64	16	0	80	0	74	0	0	74	16	80	0	74	chr9_108990769
chr9	109013442	109013442	8.2	8.2%_49r	chr9	109013442	CTNNAL1	EXON	0	45	4	0	49	0	36	0	0	36	4	49	0	36	chr9_109013442
chr9	97633823	97633823	7.1	7.1%_28r	chr9	97633823	NCBP1	EXON	26	0	0	2	28	18	0	0	0	18	2	28	0	18	chr9_97633823
chr9	97633825	97633825	7.1	7.1%_28r	chr9	97633825	NCBP1	EXON	26	0	0	2	28	18	0	0	0	18	2	28	0	18	chr9_97633825
chr9	97633841	97633841	7.1	7.1%_42r	chr9	97633841	NCBP1	EXON	39	0	0	3	42	36	0	0	0	36	3	42	0	36	chr9_97633841
chr9	97640832	97640832	13.5	13.5%_37r	chr9	97640832	NCBP1	EXON	32	0	0	5	37	30	0	0	0	30	5	37	0	30	chr9_97640832
chr9	97641612	97641612	6.7	6.7%_30r	chr9	97641612	NCBP1	EXON	28	0	0	2	30	43	0	0	0	43	2	30	0	43	chr9_97641612
chr9	97648115	97648115	8.6	8.6%_35r	chr9	97648115	NCBP1	EXON	32	0	0	3	35	55	0	0	0	55	3	35	0	55	chr9_97648115
chr9	97648182	97648182	7	7.0%_43r	chr9	97648182	NCBP1	EXON	40	0	0	3	43	46	0	0	0	46	3	43	0	46	chr9_97648182
chr9	97650594	97650594	10.3	10.3%_29r	chr9	97650594	NCBP1	EXON	26	0	0	3	29	39	0	0	0	39	3	29	0	39	chr9_97650594
chr9	97653905	97653905	13.6	13.6%_44r	chr9	97653905	NCBP1	EXON	38	0	0	6	44	47	0	0	0	47	6	44	0	47	chr9_97653905
chr9	97662993	97662993	14.6	14.6%_48r	chr9	97662993	NCBP1	EXON	41	0	0	7	48	35	0	0	0	35	7	48	0	35	chr9_97662993
chr9	97662997	97662997	8	8.0%_50r	chr9	97662997	NCBP1	EXON	46	0	0	4	50	39	0	0	0	39	4	50	0	39	chr9_97662997
chr9	97662998	97662998	10	10.0%_50r	chr9	97662998	NCBP1	EXON	45	0	0	5	50	42	0	0	0	42	5	50	0	42	chr9_97662998
chr9	97666868	97666868	25	25.0%_20r	chr9	97666868	NCBP1	EXON	15	0	0	5	20	29	0	0	0	29	5	20	0	29	chr9_97666868
chr9	97673678	97673678	8.3	8.3%_24r	chr9	97673678	NCBP1	EXON	22	0	0	2	24	18	0	0	0	18	2	24	0	18	chr9_97673678
chr9	33266024	33266024	6.7	6.7%_180r	chr9	33266024	CHMP5	EXON	168	0	0	12	180	142	0	0	0	142	12	180	0	142	chr9_33266024
chr9	33278126	33278126	6.5	6.5%_201r	chr9	33278126	CHMP5	EXON	188	0	0	13	201	174	0	0	0	174	13	201	0	174	chr9_33278126
chr9	33280858	33280858	18.1	18.1%_238r	chr9	33280858	CHMP5	EXON	195	0	0	43	238	169	0	0	0	169	43	238	0	169	chr9_33280858
chr9	128941481	128941481	7.7	7.7%_26r	chr9	128941481	PHYHD1	EXON	24	0	0	2	26	37	0	0	0	37	2	26	0	37	chr9_128941481
chr9	121339612	121339612	8	8.0%_25r	chr9	121339612	STOM	EXON	0	23	2	0	25	0	12	0	0	12	2	25	0	12	chr9_121339612
chr9	121340236	121340236	7.1	7.1%_28r	chr9	121340236	STOM	EXON	0	26	2	0	28	0	17	0	0	17	2	28	0	17	chr9_121340236
chr9	121341080	121341080	6.7	6.7%_30r	chr9	121341080	STOM	EXON	0	28	2	0	30	0	30	0	0	30	2	30	0	30	chr9_121341080
chr9	121341229	121341229	25	25.0%_32r	chr9	121341229	STOM	EXON	0	24	8	0	32	0	37	0	0	37	8	32	0	37	chr9_121341229
chr9	121341323	121341323	6.5	6.5%_31r	chr9	121341323	STOM	EXON	0	29	2	0	31	0	33	0	0	33	2	31	0	33	chr9_121341323
chr9	120869687	120869687	13	13.0%_23r	chr9	120869687	PHF19	EXON	0	20	3	0	23	0	17	0	0	17	3	23	0	17	chr9_120869687
chr9	84002574	84002574	8.7	8.7%_23r	chr9	84002574	RMI1	EXON	21	0	0	2	23	15	0	0	0	15	2	23	0	15	chr9_84002574
chr9	122280549	122280549	14.8	14.8%_27r	chr9	122280549	MRRF	EXON	23	0	0	4	27	25	0	0	0	25	4	27	0	25	chr9_122280549
chr9	86026513	86026513	6.5	6.5%_31r	chr9	86026513	GOLM1	EXON	0	29	2	0	31	0	23	0	0	23	2	31	0	23	chr9_86026513
chr9	86026611	86026611	7.1	7.1%_28r	chr9	86026611	GOLM1	EXON	0	26	2	0	28	0	38	0	0	38	2	28	0	38	chr9_86026611
chr9	86026943	86026943	20	20.0%_20r	chr9	86026943	GOLM1	EXON	0	16	4	0	20	0	20	0	0	20	4	20	0	20	chr9_86026943
chr9	86027120	86027120	13.3	13.3%_30r	chr9	86027120	GOLM1	EXON	0	26	4	0	30	0	23	0	0	23	4	30	0	23	chr9_86027120
chr9	86036397	86036397	6.9	6.9%_29r	chr9	86036397	GOLM1	EXON	0	27	2	0	29	0	22	0	0	22	2	29	0	22	chr9_86036397
chr9	86077415	86077415	8.7	8.7%_23r	chr9	86077415	GOLM1	EXON	0	21	2	0	23	1	30	0	0	31	2	23	0	31	chr9_86077415
chr9	97675132	97675132	7.4	7.4%_27r	chr9	97675132	XPA	EXON	0	25	2	0	27	0	11	0	0	11	2	27	0	11	chr9_97675132
chr9	97675202	97675202	8.3	8.3%_24r	chr9	97675202	XPA	EXON	0	22	2	0	24	0	13	0	0	13	2	24	0	13	chr9_97675202
chr9	128472960	128472960	6.2	6.2%_32r	chr9	128472960	ODF2	EXON	30	0	0	2	32	27	0	0	0	27	2	32	0	27	chr9_128472960
chr9	128473638	128473638	10.3	10.3%_39r	chr9	128473638	ODF2	EXON	35	0	0	4	39	22	0	0	0	22	4	39	0	22	chr9_128473638
chr9	128481620	128481620	10	10.0%_20r	chr9	128481620	ODF2	EXON	18	0	0	2	20	20	0	0	0	20	2	20	0	20	chr9_128481620
chr9	128481648	128481648	9.1	9.1%_22r	chr9	128481648	ODF2	EXON	20	0	0	2	22	20	0	0	0	20	2	22	0	20	chr9_128481648
chr9	128484043	128484043	6.7	6.7%_30r	chr9	128484043	ODF2	EXON	28	0	0	2	30	16	0	0	0	16	2	30	0	16	chr9_128484043
chr9	128484723	128484723	6.7	6.7%_30r	chr9	128484723	ODF2	EXON	28	0	0	2	30	32	0	0	0	32	2	30	0	32	chr9_128484723
chr9	128484756	128484756	8.6	8.6%_35r	chr9	128484756	ODF2	EXON	32	0	0	3	35	26	0	0	0	26	3	35	0	26	chr9_128484756
chr9	128484825	128484825	9.1	9.1%_33r	chr9	128484825	ODF2	EXON	30	0	0	3	33	18	0	0	0	18	3	33	0	18	chr9_128484825
chr9	128485382	128485382	22.6	22.6%_31r	chr9	128485382	ODF2	EXON	24	0	0	7	31	20	0	0	0	20	7	31	0	20	chr9_128485382
chr9	128492486	128492486	8.2	8.2%_49r	chr9	128492486	ODF2	EXON	45	0	0	4	49	23	0	0	0	23	4	49	0	23	chr9_128492486
chr9	128492768	128492768	8	8.0%_25r	chr9	128492768	ODF2	EXON	23	0	0	2	25	20	0	0	0	20	2	25	0	20	chr9_128492768
chr9	128494616	128494616	22.2	22.2%_27r	chr9	128494616	ODF2	EXON	21	0	0	6	27	33	0	0	0	33	6	27	0	33	chr9_128494616
chr9	128499054	128499054	6.1	6.1%_33r	chr9	128499054	ODF2	EXON	31	0	0	2	33	18	0	0	0	18	2	33	0	18	chr9_128499054
chr9	128500119	128500119	6.2	6.2%_32r	chr9	128500119	ODF2	EXON	30	0	0	2	32	17	0	0	0	17	2	32	0	17	chr9_128500119
chr9	128500387	128500387	8.7	8.7%_23r	chr9	128500387	ODF2	EXON	21	0	0	2	23	19	0	0	0	19	2	23	0	19	chr9_128500387
chr9	128500731	128500731	24	24.0%_25r	chr9	128500731	ODF2	EXON	19	0	0	6	25	25	0	0	0	25	6	25	0	25	chr9_128500731
chr9	128500796	128500796	7.3	7.3%_41r	chr9	128500796	ODF2	EXON	38	0	0	3	41	32	0	0	0	32	3	41	0	32	chr9_128500796
chr9	75130610	75130610	8.2	8.2%_49r	chr9	75130610	OSTF1	EXON	45	0	0	4	49	35	0	0	0	35	4	49	0	35	chr9_75130610
chr9	75130614	75130614	11.9	11.9%_42r	chr9	75130614	OSTF1	EXON	37	0	0	5	42	33	0	0	0	33	5	42	0	33	chr9_75130614
chr9	75130632	75130632	9.4	9.4%_32r	chr9	75130632	OSTF1	EXON	29	0	0	3	32	24	0	0	0	24	3	32	0	24	chr9_75130632
chr9	75140891	75140891	10.6	10.6%_47r	chr9	75140891	OSTF1	EXON	42	0	0	5	47	45	0	0	0	45	5	47	0	45	chr9_75140891
chr9	75146694	75146694	35.3	35.3%_51r	chr9	75146694	OSTF1	EXON	33	0	0	18	51	35	0	0	0	35	18	51	0	35	chr9_75146694
chr9	75146699	75146699	16.3	16.3%_49r	chr9	75146699	OSTF1	EXON	41	0	0	8	49	38	0	0	0	38	8	49	0	38	chr9_75146699
chr9	26906033	26906033	6.9	6.9%_29r	chr9	26906033	PLAA	EXON	0	27	2	0	29	0	16	0	0	16	2	29	0	16	chr9_26906033
chr9	26906035	26906035	7.1	7.1%_28r	chr9	26906035	PLAA	EXON	0	26	2	0	28	0	16	0	0	16	2	28	0	16	chr9_26906035
chr9	26906038	26906038	10.7	10.7%_28r	chr9	26906038	PLAA	EXON	0	25	3	0	28	0	18	0	0	18	3	28	0	18	chr9_26906038
chr9	26907989	26907989	6.7	6.7%_30r	chr9	26907989	PLAA	EXON	0	28	2	0	30	0	13	0	0	13	2	30	0	13	chr9_26907989
chr9	26919432	26919432	18.2	18.2%_33r	chr9	26919432	PLAA	EXON	0	27	6	0	33	0	21	0	0	21	6	33	0	21	chr9_26919432
chr9	26925852	26925852	6.5	6.5%_31r	chr9	26925852	PLAA	EXON	0	29	2	0	31	0	41	0	0	41	2	31	0	41	chr9_26925852
chr9	26925874	26925874	16.7	16.7%_36r	chr9	26925874	PLAA	EXON	0	30	6	0	36	0	68	0	0	68	6	36	0	68	chr9_26925874
chr9	26926480	26926480	6.2	6.2%_32r	chr9	26926480	PLAA	EXON	0	30	2	0	32	0	40	0	0	40	2	32	0	40	chr9_26926480
chr9	26926553	26926553	7.1	7.1%_28r	chr9	26926553	PLAA	EXON	0	26	2	0	28	0	27	0	0	27	2	28	0	27	chr9_26926553
chr9	26928170	26928170	27.3	27.3%_22r	chr9	26928170	PLAA	EXON	0	16	6	0	22	0	35	0	0	35	6	22	0	35	chr9_26928170
chr9	26928179	26928179	7.1	7.1%_28r	chr9	26928179	PLAA	EXON	0	26	2	0	28	0	41	0	0	41	2	28	0	41	chr9_26928179
chr9	26928212	26928212	6.2	6.2%_32r	chr9	26928212	PLAA	EXON	0	30	2	0	32	0	25	0	0	25	2	32	0	25	chr9_26928212
chr9	26928344	26928344	11.1	11.1%_27r	chr9	26928344	PLAA	EXON	0	24	3	0	27	0	33	0	0	33	3	27	0	33	chr9_26928344
chr9	26928362	26928362	20	20.0%_30r	chr9	26928362	PLAA	EXON	0	24	6	0	30	0	36	0	0	36	6	30	0	36	chr9_26928362
chr9	26935190	26935190	12.5	12.5%_24r	chr9	26935190	PLAA	EXON	0	21	3	0	24	0	28	0	0	28	3	24	0	28	chr9_26935190
chr9	26947083	26947083	8.7	8.7%_23r	chr9	26947083	PLAA	EXON	0	21	2	0	23	0	18	0	0	18	2	23	0	18	chr9_26947083
chr9	137039690	137039690	7.1	7.1%_28r	chr9	137039690	NPDC1	EXON	0	26	2	0	28	0	25	0	0	25	2	28	0	25	chr9_137039690
chr9	133020513	133020513	8.3	8.3%_24r	chr9	133020513	SNORD141B	EXON	22	0	0	2	24	21	1	1	0	23	2	24	0	23	chr9_133020513
chr9	124518452	124518452	6.5	6.5%_31r	chr9	124518452	NR6A1	EXON	0	29	2	0	31	0	19	0	0	19	2	31	0	19	chr9_124518452
chr9	124518462	124518462	6.9	6.9%_29r	chr9	124518462	NR6A1	EXON	0	27	2	0	29	0	19	0	0	19	2	29	0	19	chr9_124518462
chr9	124518463	124518463	13.8	13.8%_29r	chr9	124518463	NR6A1	EXON	0	25	4	0	29	0	20	0	0	20	4	29	0	20	chr9_124518463
chr9	124518466	124518466	7.4	7.4%_27r	chr9	124518466	NR6A1	EXON	0	25	2	0	27	0	19	0	0	19	2	27	0	19	chr9_124518466
chr9	124518926	124518926	11.1	11.1%_36r	chr9	124518926	NR6A1	EXON	0	32	4	0	36	0	21	0	0	21	4	36	0	21	chr9_124518926
chr9	124518970	124518970	40.7	40.7%_54r	chr9	124518970	NR6A1	EXON	0	32	22	0	54	0	33	0	0	33	22	54	0	33	chr9_124518970
chr9	124519087	124519087	31.6	31.6%_57r	chr9	124519087	NR6A1	EXON	0	39	18	0	57	0	41	0	0	41	18	57	0	41	chr9_124519087
chr9	124519644	124519644	11.1	11.1%_27r	chr9	124519644	NR6A1	EXON	0	24	3	0	27	0	16	0	0	16	3	27	0	16	chr9_124519644
chr9	34398297	34398297	21.7	21.7%_23r	chr9	34398297	FAM219A	EXON	0	18	5	0	23	0	17	0	0	17	5	23	0	17	chr9_34398297
chr9	19116105	19116105	15.4	15.4%_26r	chr9	19116105	PLIN2	EXON	0	22	4	0	26	0	27	0	0	27	4	26	0	27	chr9_19116105
chr9	19118375	19118375	6.1	6.1%_33r	chr9	19118375	PLIN2	EXON	0	31	2	0	33	0	39	0	0	39	2	33	0	39	chr9_19118375
chr9	19119661	19119661	13.8	13.8%_29r	chr9	19119661	PLIN2	EXON	0	25	4	0	29	0	31	0	0	31	4	29	0	31	chr9_19119661
chr9	19120994	19120994	11.6	11.6%_43r	chr9	19120994	PLIN2	EXON	0	38	5	0	43	0	37	0	0	37	5	43	0	37	chr9_19120994
chr9	19121006	19121006	11.1	11.1%_36r	chr9	19121006	PLIN2	EXON	0	32	4	0	36	0	27	0	0	27	4	36	0	27	chr9_19121006
chr9	19121056	19121056	19.2	19.2%_26r	chr9	19121056	PLIN2	EXON	0	21	5	0	26	0	25	0	0	25	5	26	0	25	chr9_19121056
chr9	19121070	19121070	22.2	22.2%_27r	chr9	19121070	PLIN2	EXON	0	21	6	0	27	0	27	0	0	27	6	27	0	27	chr9_19121070
chr9	19123611	19123611	6.5	6.5%_31r	chr9	19123611	PLIN2	EXON	0	29	2	0	31	0	25	0	0	25	2	31	0	25	chr9_19123611
chr9	19123629	19123629	16.1	16.1%_31r	chr9	19123629	PLIN2	EXON	0	26	5	0	31	0	29	0	0	29	5	31	0	29	chr9_19123629
chr9	19126156	19126156	9.1	9.1%_22r	chr9	19126156	PLIN2	EXON	0	20	2	0	22	0	19	0	0	19	2	22	0	19	chr9_19126156
chr9	19055960	19055960	7.1	7.1%_28r	chr9	19055960	HAUS6	EXON	0	26	2	0	28	0	27	0	0	27	2	28	0	27	chr9_19055960
chr9	86264672	86264672	11.4	11.4%_35r	chr9	86264672	ISCA1	EXON	0	31	4	0	35	0	35	0	0	35	4	35	0	35	chr9_86264672
chr9	73170062	73170062	14.8	14.8%_27r	chr9	73170062	ANXA1	EXON	23	0	0	4	27	39	0	0	0	39	4	27	0	39	chr9_73170062
chr9	73170103	73170103	6.9	6.9%_29r	chr9	73170103	ANXA1	EXON	27	0	0	2	29	39	0	0	0	39	2	29	0	39	chr9_73170103
chr9	107330612	107330612	26.5	26.5%_34r	chr9	107330612	RAD23B	EXON	25	0	0	9	34	40	0	0	0	40	9	34	0	40	chr9_107330612
chr9	107331006	107331006	7.4	7.4%_27r	chr9	107331006	RAD23B	EXON	25	0	0	2	27	25	0	0	0	25	2	27	0	25	chr9_107331006
chr9	38396564	38396564	10.3	10.3%_29r	chr9	38396564	ALDH1B1	EXON	26	0	0	3	29	30	0	0	0	30	3	29	0	30	chr9_38396564
chr9	38396774	38396774	10	10.0%_50r	chr9	38396774	ALDH1B1	EXON	45	0	0	5	50	39	0	0	0	39	5	50	0	39	chr9_38396774
chr9	38397370	38397370	6.2	6.2%_32r	chr9	38397370	ALDH1B1	EXON	30	0	0	2	32	19	0	0	0	19	2	32	0	19	chr9_38397370
chr9	38397484	38397484	7.5	7.5%_53r	chr9	38397484	ALDH1B1	EXON	49	0	0	4	53	33	0	0	0	33	4	53	0	33	chr9_38397484
chr9	38397490	38397490	6.9	6.9%_58r	chr9	38397490	ALDH1B1	EXON	54	0	0	4	58	38	1	0	0	39	4	58	0	39	chr9_38397490
chr9	38397696	38397696	21.7	21.7%_46r	chr9	38397696	ALDH1B1	EXON	36	0	0	10	46	38	0	0	0	38	10	46	0	38	chr9_38397696
chr9	38397721	38397721	21.2	21.2%_52r	chr9	38397721	ALDH1B1	EXON	41	0	0	11	52	39	0	0	0	39	11	52	0	39	chr9_38397721
chr9	38397862	38397862	6.3	6.3%_63r	chr9	38397862	ALDH1B1	EXON	59	0	0	4	63	53	0	0	0	53	4	63	0	53	chr9_38397862
chr9	38398136	38398136	8.8	8.8%_34r	chr9	38398136	ALDH1B1	EXON	31	0	0	3	34	26	0	0	0	26	3	34	0	26	chr9_38398136
chr9	38398173	38398173	6.9	6.9%_29r	chr9	38398173	ALDH1B1	EXON	27	0	0	2	29	19	0	0	0	19	2	29	0	19	chr9_38398173
chr9	131524508	131524508	37.8	37.8%_45r	chr9	131524508	UCK1	EXON	0	28	17	0	45	0	18	0	0	18	17	45	0	18	chr9_131524508
chr9	131524791	131524791	20	20.0%_35r	chr9	131524791	UCK1	EXON	0	28	7	0	35	0	27	0	0	27	7	35	0	27	chr9_131524791
chr9	131524796	131524796	25	25.0%_36r	chr9	131524796	UCK1	EXON	0	27	9	0	36	0	29	0	0	29	9	36	0	29	chr9_131524796
chr9	131530521	131530521	11.1	11.1%_27r	chr9	131530521	UCK1	EXON	0	24	3	0	27	0	17	0	0	17	3	27	0	17	chr9_131530521
chr9	131530540	131530540	7.7	7.7%_39r	chr9	131530540	UCK1	EXON	0	35	3	1	39	0	25	0	0	25	3	39	0	25	chr9_131530540
chr9	99152351	99152351	8.3	8.3%_24r	chr9	99152351	TGFBR1	EXON	22	0	0	2	24	15	0	0	0	15	2	24	0	15	chr9_99152351
chr9	99152616	99152616	15	15.0%_20r	chr9	99152616	TGFBR1	EXON	17	0	0	3	20	13	0	0	0	13	3	20	0	13	chr9_99152616
chr9	99153189	99153189	7.4	7.4%_27r	chr9	99153189	TGFBR1	EXON	25	0	0	2	27	32	0	0	0	32	2	27	0	32	chr9_99153189
chr9	121179824	121179824	7.1	7.1%_56r	chr9	121179824	RAB14	EXON	0	52	4	0	56	0	41	0	0	41	4	56	0	41	chr9_121179824
chr9	121179833	121179833	42.6	42.6%_54r	chr9	121179833	RAB14	EXON	0	31	23	0	54	0	35	0	0	35	23	54	0	35	chr9_121179833
chr9	121180193	121180193	8.9	8.9%_56r	chr9	121180193	RAB14	EXON	0	51	5	0	56	0	57	0	0	57	5	56	0	57	chr9_121180193
chr9	121180327	121180327	15.3	15.3%_59r	chr9	121180327	RAB14	EXON	0	50	9	0	59	0	60	0	0	60	9	59	0	60	chr9_121180327
chr9	121181203	121181203	10.7	10.7%_56r	chr9	121181203	RAB14	EXON	0	50	6	0	56	0	42	0	0	42	6	56	0	42	chr9_121181203
chr9	121181262	121181262	13.5	13.5%_37r	chr9	121181262	RAB14	EXON	0	32	5	0	37	0	40	0	0	40	5	37	0	40	chr9_121181262
chr9	121181344	121181344	34.7	34.7%_49r	chr9	121181344	RAB14	EXON	0	32	17	0	49	0	60	0	0	60	17	49	0	60	chr9_121181344
chr9	121181418	121181418	6.1	6.1%_49r	chr9	121181418	RAB14	EXON	0	46	3	0	49	0	73	0	0	73	3	49	0	73	chr9_121181418
chr9	121181434	121181434	6.2	6.2%_48r	chr9	121181434	RAB14	EXON	1	44	3	0	48	0	62	0	0	62	3	48	0	62	chr9_121181434
chr9	121181520	121181520	6.8	6.8%_44r	chr9	121181520	RAB14	EXON	0	41	3	0	44	0	39	0	0	39	3	44	0	39	chr9_121181520
chr9	33046270	33046270	11.1	11.1%_45r	chr9	33046270	SMU1	EXON	0	40	5	0	45	0	50	0	0	50	5	45	0	50	chr9_33046270
chr9	33046292	33046292	7.1	7.1%_42r	chr9	33046292	SMU1	EXON	0	39	3	0	42	0	38	0	0	38	3	42	0	38	chr9_33046292
chr9	33046411	33046411	14.5	14.5%_55r	chr9	33046411	SMU1	EXON	0	47	8	0	55	0	56	0	0	56	8	55	0	56	chr9_33046411
chr9	33048138	33048138	14.7	14.7%_34r	chr9	33048138	SMU1	EXON	0	29	5	0	34	0	41	0	0	41	5	34	0	41	chr9_33048138
chr9	33048226	33048226	22.6	22.6%_31r	chr9	33048226	SMU1	EXON	0	24	7	0	31	0	26	0	0	26	7	31	0	26	chr9_33048226
chr9	33062127	33062127	6.1	6.1%_33r	chr9	33062127	SMU1	EXON	0	31	2	0	33	0	29	0	0	29	2	33	0	29	chr9_33062127
chr9	33071756	33071756	10.3	10.3%_39r	chr9	33071756	SMU1	EXON	0	35	4	0	39	0	41	0	0	41	4	39	0	41	chr9_33071756
chr9	130698192	130698192	10.9	10.9%_46r	chr9	130698192	EXOSC2	EXON	41	0	0	5	46	55	0	0	0	55	5	46	0	55	chr9_130698192
chr9	130703819	130703819	14.8	14.8%_135r	chr9	130703819	EXOSC2	EXON	115	0	0	20	135	87	0	0	0	87	20	135	0	87	chr9_130703819
chr9	130703999	130703999	16.9	16.9%_118r	chr9	130703999	EXOSC2	EXON	98	0	0	20	118	85	0	0	0	85	20	118	0	85	chr9_130703999
chr9	130704023	130704023	11.1	11.1%_117r	chr9	130704023	EXOSC2	EXON	104	0	0	13	117	77	0	0	0	77	13	117	0	77	chr9_130704023
chr9	130622720	130622720	12.5	12.5%_32r	chr9	130622720	FUBP3	EXON	28	0	0	4	32	37	0	0	0	37	4	32	0	37	chr9_130622720
chr9	130636102	130636102	13	13.0%_23r	chr9	130636102	FUBP3	EXON	20	0	0	3	23	23	0	0	0	23	3	23	0	23	chr9_130636102
chr9	130637021	130637021	8.3	8.3%_24r	chr9	130637021	FUBP3	EXON	22	0	0	2	24	24	0	0	0	24	2	24	0	24	chr9_130637021
chr9	130637398	130637398	50	50.0%_22r	chr9	130637398	FUBP3	EXON	11	0	0	11	22	28	1	0	0	29	11	22	0	29	chr9_130637398
chr9	130637404	130637404	30.4	30.4%_23r	chr9	130637404	FUBP3	EXON	16	0	0	7	23	32	0	0	0	32	7	23	0	32	chr9_130637404
chr9	128720856	128720856	8	8.0%_25r	chr9	128720856	PKN3	EXON	23	0	0	2	25	19	0	0	0	19	2	25	0	19	chr9_128720856
chr9	127935247	127935247	14.7	14.7%_211r	chr9	127935247	DPM2	EXON	0	180	31	0	211	0	165	0	0	165	31	211	0	165	chr9_127935247
chr9	71973108	71973108	6.2	6.2%_32r	chr9	71973108	C9orf85	EXON	30	0	0	2	32	21	0	0	0	21	2	32	0	21	chr9_71973108
chr9	128323145	128323145	9.3	9.3%_43r	chr9	128323145	COQ4	EXON	39	0	0	4	43	70	0	0	0	70	4	43	0	70	chr9_128323145
chr9	128332199	128332199	18.2	18.2%_33r	chr9	128332199	COQ4	EXON	27	0	0	6	33	34	0	0	0	34	6	33	0	34	chr9_128332199
chr9	128333854	128333854	7.4	7.4%_27r	chr9	128333854	COQ4	EXON	25	0	0	2	27	34	0	0	0	34	2	27	0	34	chr9_128333854
chr9	2804315	2804315	7.1	7.1%_28r	chr9	2804315	PUM3	EXON	0	26	2	0	28	0	24	0	0	24	2	28	0	24	chr9_2804315
chr9	2804439	2804439	15	15.0%_20r	chr9	2804439	PUM3	EXON	0	17	3	0	20	1	26	0	0	27	3	20	0	27	chr9_2804439
chr9	2807845	2807845	13.2	13.2%_38r	chr9	2807845	PUM3	EXON	0	33	5	0	38	0	30	0	0	30	5	38	0	30	chr9_2807845
chr9	2811383	2811383	20	20.0%_35r	chr9	2811383	PUM3	EXON	0	28	7	0	35	0	26	0	0	26	7	35	0	26	chr9_2811383
chr9	2811434	2811434	10.7	10.7%_28r	chr9	2811434	PUM3	EXON	0	25	3	0	28	0	31	0	0	31	3	28	0	31	chr9_2811434
chr9	2811499	2811499	17.5	17.5%_40r	chr9	2811499	PUM3	EXON	0	33	7	0	40	0	36	0	0	36	7	40	0	36	chr9_2811499
chr9	2820043	2820043	6.4	6.4%_47r	chr9	2820043	PUM3	EXON	0	44	3	0	47	0	33	0	0	33	3	47	0	33	chr9_2820043
chr9	2820093	2820093	13.6	13.6%_22r	chr9	2820093	PUM3	EXON	0	19	3	0	22	0	29	0	0	29	3	22	0	29	chr9_2820093
chr9	2827118	2827118	7.7	7.7%_39r	chr9	2827118	PUM3	EXON	0	36	3	0	39	0	39	0	1	40	3	39	0	40	chr9_2827118
chr9	131492189	131492189	8.7	8.7%_23r	chr9	131492189	PRRC2B	EXON	21	0	0	2	23	19	0	0	0	19	2	23	0	19	chr9_131492189
chr9	131497633	131497633	6.2	6.2%_32r	chr9	131497633	PRRC2B	EXON	30	0	0	2	32	48	0	0	0	48	2	32	0	48	chr9_131497633
chr9	131499444	131499444	8.3	8.3%_24r	chr9	131499444	PRRC2B	EXON	22	0	0	2	24	28	0	0	0	28	2	24	0	28	chr9_131499444
chr9	131499507	131499507	23.8	23.8%_21r	chr9	131499507	PRRC2B	EXON	16	0	0	5	21	15	0	0	0	15	5	21	0	15	chr9_131499507
chr9	131499508	131499508	20	20.0%_20r	chr9	131499508	PRRC2B	EXON	16	0	0	4	20	14	0	0	0	14	4	20	0	14	chr9_131499508
chr9	131499563	131499563	8.3	8.3%_24r	chr9	131499563	PRRC2B	EXON	22	0	0	2	24	41	0	0	0	41	2	24	0	41	chr9_131499563
chr9	131499627	131499627	20.8	20.8%_24r	chr9	131499627	PRRC2B	EXON	19	0	0	5	24	32	0	0	0	32	5	24	0	32	chr9_131499627
chr9	131499741	131499741	19	19.0%_21r	chr9	131499741	PRRC2B	EXON	17	0	0	4	21	22	0	0	0	22	4	21	0	22	chr9_131499741
chr9	131499747	131499747	9.5	9.5%_21r	chr9	131499747	PRRC2B	EXON	19	0	0	2	21	21	0	0	0	21	2	21	0	21	chr9_131499747
chr9	131499987	131499987	12.8	12.8%_47r	chr9	131499987	PRRC2B	EXON	41	0	0	6	47	48	0	0	0	48	6	47	0	48	chr9_131499987
chr9	131500019	131500019	6.2	6.2%_32r	chr9	131500019	PRRC2B	EXON	30	0	0	2	32	16	0	0	0	16	2	32	0	16	chr9_131500019
chr9	32418350	32418350	13.6	13.6%_22r	chr9	32418350	ACO1	EXON	19	0	0	3	22	19	0	0	0	19	3	22	0	19	chr9_32418350
chr9	32420917	32420917	9.5	9.5%_21r	chr9	32420917	ACO1	EXON	19	0	0	2	21	20	0	0	0	20	2	21	0	20	chr9_32420917
chr9	32423401	32423401	7.4	7.4%_27r	chr9	32423401	ACO1	EXON	24	0	1	2	27	21	0	0	0	21	2	27	0	21	chr9_32423401
chr9	32425955	32425955	6.2	6.2%_32r	chr9	32425955	ACO1	EXON	30	0	0	2	32	17	0	0	0	17	2	32	0	17	chr9_32425955
chr9	32429473	32429473	23.1	23.1%_26r	chr9	32429473	ACO1	EXON	20	0	0	6	26	25	0	0	0	25	6	26	0	25	chr9_32429473
chr9	32431744	32431744	20	20.0%_20r	chr9	32431744	ACO1	EXON	16	0	0	4	20	18	0	0	0	18	4	20	0	18	chr9_32431744
chr9	32440566	32440566	12	12.0%_25r	chr9	32440566	ACO1	EXON	22	0	0	3	25	17	0	0	0	17	3	25	0	17	chr9_32440566
chr9	32450059	32450059	6.9	6.9%_29r	chr9	32450059	ACO1	EXON	27	0	0	2	29	33	0	0	0	33	2	29	0	33	chr9_32450059
chr9	32450265	32450265	10	10.0%_20r	chr9	32450265	ACO1	EXON	18	0	0	2	20	19	0	0	0	19	2	20	0	19	chr9_32450265
chr9	32450354	32450354	8	8.0%_25r	chr9	32450354	ACO1	EXON	23	0	0	2	25	24	0	0	0	24	2	25	0	24	chr9_32450354
chr9	32450386	32450386	7.4	7.4%_27r	chr9	32450386	ACO1	EXON	25	0	0	2	27	17	0	0	0	17	2	27	0	17	chr9_32450386
chr9	83968440	83968440	6.7	6.7%_180r	chr9	83968440	HNRNPK	EXON	0	168	12	0	180	0	137	0	0	137	12	180	0	137	chr9_83968440
chr9	83969267	83969267	8.2	8.2%_638r	chr9	83969267	HNRNPK	EXON	0	586	52	0	638	1	562	0	1	564	52	638	0	564	chr9_83969267
chr9	83969435	83969435	6.6	6.6%_241r	chr9	83969435	HNRNPK	EXON	0	225	16	0	241	0	207	0	0	207	16	241	0	207	chr9_83969435
chr9	83970766	83970766	9.1	9.1%_860r	chr9	83970766	HNRNPK	EXON	1	781	78	0	860	0	733	0	0	734	78	860	0	734	chr9_83970766
chr9	83971279	83971279	6.9	6.9%_360r	chr9	83971279	HNRNPK	EXON	0	335	25	0	360	0	372	0	0	372	25	360	0	372	chr9_83971279
chr9	83971931	83971931	11.5	11.5%_506r	chr9	83971931	HNRNPK	EXON	0	448	58	0	506	0	443	0	0	443	58	506	0	443	chr9_83971931
chr9	83973334	83973334	18.8	18.8%_373r	chr9	83973334	HNRNPK	EXON	0	303	70	0	373	0	327	0	0	327	70	373	0	327	chr9_83973334
chr9	83978389	83978389	6.6	6.6%_468r	chr9	83978389	HNRNPK	EXON	0	437	31	0	468	0	385	0	0	385	31	468	0	385	chr9_83978389
chr9	37087259	37087259	6.1	6.1%_33r	chr9	37087259	EBLN3P	EXON	31	0	0	2	33	25	0	0	0	25	2	33	0	25	chr9_37087259
chr9	37088975	37088975	6.5	6.5%_31r	chr9	37088975	EBLN3P	EXON	29	0	0	2	31	17	0	0	0	17	2	31	0	17	chr9_37088975
chr9	65675956	65675956	8.3	8.3%_60r	chr9	65675956	LOC105379807	INTRON	55	0	0	5	60	39	0	0	0	39	5	60	0	39	chr9_65675956
chr9	65682850	65682850	14.3	14.3%_28r	chr9	65682850	LOC105379807	INTRON	24	0	0	4	28	32	0	0	0	32	4	28	0	32	chr9_65682850
chr9	92031217	92031217	13.9	13.9%_36r	chr9	92031217	SPTLC1	EXON	0	31	5	0	36	0	21	0	0	21	5	36	0	21	chr9_92031217
chr9	92031634	92031634	21.7	21.7%_46r	chr9	92031634	SPTLC1	EXON	0	36	10	0	46	0	41	0	0	41	10	46	0	41	chr9_92031634
chr9	92032207	92032207	13.3	13.3%_45r	chr9	92032207	SPTLC1	EXON	0	39	6	0	45	0	52	0	0	52	6	45	0	52	chr9_92032207
chr9	92032209	92032209	6.8	6.8%_44r	chr9	92032209	SPTLC1	EXON	0	41	3	0	44	0	51	0	0	51	3	44	0	51	chr9_92032209
chr9	92032374	92032374	8.5	8.5%_47r	chr9	92032374	SPTLC1	EXON	0	43	4	0	47	0	67	0	0	67	4	47	0	67	chr9_92032374
chr9	92032380	92032380	9.3	9.3%_43r	chr9	92032380	SPTLC1	EXON	0	39	4	0	43	0	55	0	0	55	4	43	0	55	chr9_92032380
chr9	92032422	92032422	8	8.0%_75r	chr9	92032422	SPTLC1	EXON	0	69	6	0	75	1	61	0	0	62	6	75	0	62	chr9_92032422
chr9	92032481	92032481	25.3	25.3%_75r	chr9	92032481	SPTLC1	EXON	0	56	19	0	75	0	68	0	0	68	19	75	0	68	chr9_92032481
chr9	92034836	92034836	11.5	11.5%_61r	chr9	92034836	SPTLC1	EXON	0	54	7	0	61	0	71	0	0	71	7	61	0	71	chr9_92034836
chr9	92034860	92034860	9.4	9.4%_85r	chr9	92034860	SPTLC1	EXON	0	77	8	0	85	0	72	0	0	72	8	85	0	72	chr9_92034860
chr9	92049980	92049980	17.4	17.4%_86r	chr9	92049980	SPTLC1	EXON	0	71	15	0	86	0	59	0	0	59	15	86	0	59	chr9_92049980
chr9	128917269	128917269	28.6	28.6%_21r	chr9	128917269	LRRC8A	EXON	15	0	0	6	21	19	0	0	0	19	6	21	0	19	chr9_128917269
chr9	128917500	128917500	14.8	14.8%_54r	chr9	128917500	LRRC8A	EXON	46	0	0	8	54	55	0	0	0	55	8	54	0	55	chr9_128917500
chr9	128917513	128917513	6.6	6.6%_76r	chr9	128917513	LRRC8A	EXON	71	0	0	5	76	78	0	0	0	78	5	76	0	78	chr9_128917513
chr9	97998616	97998616	15.9	15.9%_220r	chr9	97998616	ANP32B	EXON	185	0	0	35	220	181	0	0	0	181	35	220	0	181	chr9_97998616
chr9	98005110	98005110	11.6	11.6%_275r	chr9	98005110	ANP32B	EXON	243	0	0	32	275	238	0	0	0	238	32	275	0	238	chr9_98005110
chr9	98011364	98011364	14.1	14.1%_262r	chr9	98011364	ANP32B	EXON	224	0	1	37	262	216	0	0	0	216	37	262	0	216	chr9_98011364
chr9	98015667	98015667	7.3	7.3%_41r	chr9	98015667	ANP32B	EXON	38	0	0	3	41	55	0	0	0	55	3	41	0	55	chr9_98015667
chr9	79725982	79725982	9.5	9.5%_21r	chr9	79725982	TLE4	EXON	19	0	0	2	21	17	0	0	0	17	2	21	0	17	chr9_79725982
chr9	79725986	79725986	6.2	6.2%_32r	chr9	79725986	TLE4	EXON	30	0	0	2	32	19	0	0	0	19	2	32	0	19	chr9_79725986
chr9	79726069	79726069	38.3	38.3%_47r	chr9	79726069	TLE4	EXON	29	0	0	18	47	77	0	0	0	77	18	47	0	77	chr9_79726069
chr9	79726129	79726129	12.9	12.9%_31r	chr9	79726129	TLE4	EXON	27	0	0	4	31	26	0	0	0	26	4	31	0	26	chr9_79726129
chr9	79726360	79726360	13	13.0%_23r	chr9	79726360	TLE4	EXON	20	0	0	3	23	30	0	0	0	30	3	23	0	30	chr9_79726360
chr9	79726363	79726363	33.3	33.3%_21r	chr9	79726363	TLE4	EXON	14	0	0	7	21	29	0	0	0	29	7	21	0	29	chr9_79726363
chr9	79726691	79726691	6.9	6.9%_29r	chr9	79726691	TLE4	EXON	27	0	0	2	29	43	0	0	0	43	2	29	0	43	chr9_79726691
chr9	92210542	92210542	21.2	21.2%_132r	chr9	92210542	IARS1	EXON	0	104	28	0	132	0	147	0	0	147	28	132	0	147	chr9_92210542
chr9	92210685	92210685	7.4	7.4%_135r	chr9	92210685	IARS1	EXON	0	125	10	0	135	0	169	0	0	169	10	135	0	169	chr9_92210685
chr9	92223449	92223449	6.2	6.2%_178r	chr9	92223449	IARS1	EXON	0	166	11	1	178	0	173	0	0	173	11	178	0	173	chr9_92223449
chr9	92223457	92223457	9.8	9.8%_164r	chr9	92223457	IARS1	EXON	0	148	16	0	164	0	161	0	0	161	16	164	0	161	chr9_92223457
chr9	92229106	92229106	21.8	21.8%_170r	chr9	92229106	IARS1	EXON	0	133	37	0	170	0	181	0	0	181	37	170	0	181	chr9_92229106
chr9	92243260	92243260	7.3	7.3%_124r	chr9	92243260	IARS1	EXON	0	115	9	0	124	0	157	0	0	157	9	124	0	157	chr9_92243260
chr9	92249917	92249917	7.4	7.4%_121r	chr9	92249917	IARS1	EXON	0	112	9	0	121	0	133	0	0	133	9	121	0	133	chr9_92249917
chr9	92250242	92250242	6	6.0%_149r	chr9	92250242	IARS1	EXON	0	140	9	0	149	0	160	0	0	160	9	149	0	160	chr9_92250242
chr9	92250744	92250744	7.3	7.3%_151r	chr9	92250744	IARS1	EXON	0	140	11	0	151	0	189	0	0	189	11	151	0	189	chr9_92250744
chr9	92250755	92250755	36.4	36.4%_176r	chr9	92250755	IARS1	EXON	1	111	64	0	176	0	218	0	0	218	64	176	0	218	chr9_92250755
chr9	92252049	92252049	10.7	10.7%_28r	chr9	92252049	IARS1	INTRON	0	25	3	0	28	0	22	0	0	22	3	28	0	22	chr9_92252049
chr9	92252510	92252510	6.1	6.1%_33r	chr9	92252510	IARS1	INTRON	0	31	2	0	33	0	35	0	0	35	2	33	0	35	chr9_92252510
chr9	92253441	92253441	34.1	34.1%_182r	chr9	92253441	IARS1	EXON	0	120	62	0	182	0	235	0	0	235	62	182	0	235	chr9_92253441
chr9	92258891	92258891	8.6	8.6%_139r	chr9	92258891	IARS1	EXON	0	127	12	0	139	1	188	0	0	189	12	139	0	189	chr9_92258891
chr9	92260152	92260152	10.4	10.4%_144r	chr9	92260152	IARS1	EXON	0	129	15	0	144	0	213	0	0	213	15	144	0	213	chr9_92260152
chr9	92265088	92265088	15.5	15.5%_161r	chr9	92265088	IARS1	EXON	0	136	25	0	161	0	218	0	0	218	25	161	0	218	chr9_92265088
chr9	92265504	92265504	42.7	42.7%_103r	chr9	92265504	IARS1	EXON	0	59	44	0	103	0	146	0	0	146	44	103	0	146	chr9_92265504
chr9	92269959	92269959	8.3	8.3%_169r	chr9	92269959	IARS1	EXON	1	154	14	0	169	0	170	0	0	170	14	169	0	170	chr9_92269959
chr9	92269960	92269960	7.5	7.5%_173r	chr9	92269960	IARS1	EXON	0	160	13	0	173	0	179	0	0	179	13	173	0	179	chr9_92269960
chr9	92271006	92271006	17.2	17.2%_99r	chr9	92271006	IARS1	EXON	0	82	17	0	99	0	124	0	0	124	17	99	0	124	chr9_92271006
chr9	92274448	92274448	15.5	15.5%_155r	chr9	92274448	IARS1	EXON	0	131	24	0	155	0	162	0	0	162	24	155	0	162	chr9_92274448
chr9	92274516	92274516	33.3	33.3%_147r	chr9	92274516	IARS1	EXON	0	98	49	0	147	0	196	0	0	196	49	147	0	196	chr9_92274516
chr9	92277909	92277909	13.4	13.4%_119r	chr9	92277909	IARS1	EXON	1	102	16	0	119	0	135	0	0	135	16	119	0	135	chr9_92277909
chr9	92278240	92278240	40.5	40.5%_121r	chr9	92278240	IARS1	EXON	0	72	49	0	121	0	171	0	0	171	49	121	0	171	chr9_92278240
chr9	92280801	92280801	15.9	15.9%_164r	chr9	92280801	IARS1	EXON	0	138	26	0	164	0	230	0	0	230	26	164	0	230	chr9_92280801
chr9	92285827	92285827	14.5	14.5%_145r	chr9	92285827	IARS1	EXON	0	124	21	0	145	0	174	0	0	174	21	145	0	174	chr9_92285827
chr9	92286606	92286606	12.1	12.1%_91r	chr9	92286606	IARS1	EXON	0	80	11	0	91	0	118	0	0	118	11	91	0	118	chr9_92286606
chr9	92286615	92286615	13.8	13.8%_87r	chr9	92286615	IARS1	EXON	0	75	12	0	87	1	139	0	0	140	12	87	0	140	chr9_92286615
chr9	92287845	92287845	7.3	7.3%_110r	chr9	92287845	IARS1	EXON	0	102	8	0	110	0	126	0	0	126	8	110	0	126	chr9_92287845
chr9	92288181	92288181	6.5	6.5%_154r	chr9	92288181	IARS1	EXON	0	144	10	0	154	0	147	0	0	147	10	154	0	147	chr9_92288181
chr9	92289324	92289324	12.9	12.9%_62r	chr9	92289324	IARS1	EXON	0	54	8	0	62	0	88	0	0	88	8	62	0	88	chr9_92289324
chr9	92293552	92293552	7.4	7.4%_27r	chr9	92293552	IARS1	EXON	0	25	2	0	27	0	23	0	0	23	2	27	0	23	chr9_92293552
chr9	92293630	92293630	6.2	6.2%_64r	chr9	92293630	IARS1	EXON	0	60	4	0	64	0	70	0	0	70	4	64	0	70	chr9_92293630
chr9	34241437	34241437	18.4	18.4%_38r	chr9	34241437	UBAP1	EXON	31	0	0	7	38	41	0	0	0	41	7	38	0	41	chr9_34241437
chr9	34251711	34251711	7.9	7.9%_38r	chr9	34251711	UBAP1	EXON	35	0	0	3	38	30	0	0	0	30	3	38	0	30	chr9_34251711
chr9	33624700	33624700	8.3	8.3%_96r	chr9	33624700	ANXA2P2	EXON	88	0	0	8	96	73	0	0	0	73	8	96	0	73	chr9_33624700
chr9	95086720	95086720	8.9	8.9%_45r	chr9	95086720	AOPEP	EXON	41	0	0	4	45	32	0	0	0	32	4	45	0	32	chr9_95086720
chr9	128720962	128720962	6.5	6.5%_31r	chr9	128720962	ZDHHC12	EXON	0	29	2	0	31	0	37	0	0	37	2	31	0	37	chr9_128720962
chr9	65675956	65675956	8.3	8.3%_60r	chr9	65675956	LOC102723709	INTRON	55	0	0	5	60	39	0	0	0	39	5	60	0	39	chr9_65675956
chr9	65682850	65682850	14.3	14.3%_28r	chr9	65682850	LOC102723709	INTRON	24	0	0	4	28	32	0	0	0	32	4	28	0	32	chr9_65682850
chr9	97910606	97910606	15.4	15.4%_26r	chr9	97910606	TRMO	EXON	0	22	4	0	26	0	33	0	0	33	4	26	0	33	chr9_97910606
chr9	131860471	131860471	11.8	11.8%_34r	chr9	131860471	MED27	EXON	0	30	4	0	34	0	22	0	0	22	4	34	0	22	chr9_131860471
chr9	113279063	113279063	13	13.0%_23r	chr9	113279063	PRPF4	EXON	20	0	0	3	23	27	0	0	0	27	3	23	0	27	chr9_113279063
chr9	113279121	113279121	15	15.0%_40r	chr9	113279121	PRPF4	EXON	34	0	0	6	40	36	0	0	0	36	6	40	0	36	chr9_113279121
chr9	113282656	113282656	11.4	11.4%_35r	chr9	113282656	PRPF4	EXON	31	0	0	4	35	34	0	0	0	34	4	35	0	34	chr9_113282656
chr9	113282702	113282702	7.1	7.1%_28r	chr9	113282702	PRPF4	EXON	26	0	0	2	28	29	0	0	0	29	2	28	0	29	chr9_113282702
chr9	113284368	113284368	7.9	7.9%_38r	chr9	113284368	PRPF4	EXON	35	0	0	3	38	49	0	0	0	49	3	38	0	49	chr9_113284368
chr9	113286777	113286777	11.1	11.1%_45r	chr9	113286777	PRPF4	EXON	40	0	0	5	45	33	0	0	0	33	5	45	0	33	chr9_113286777
chr9	113290505	113290505	35.2	35.2%_54r	chr9	113290505	PRPF4	EXON	35	0	0	19	54	45	0	0	0	45	19	54	0	45	chr9_113290505
chr9	113290783	113290783	6.7	6.7%_30r	chr9	113290783	PRPF4	EXON	28	0	0	2	30	30	0	0	0	30	2	30	0	30	chr9_113290783
chr9	113290987	113290987	9.1	9.1%_55r	chr9	113290987	PRPF4	EXON	50	0	0	5	55	47	0	0	0	47	5	55	0	47	chr9_113290987
chr9	113291740	113291740	7.1	7.1%_56r	chr9	113291740	PRPF4	EXON	52	0	0	4	56	49	0	0	0	49	4	56	0	49	chr9_113291740
chr9	113291836	113291836	23.5	23.5%_51r	chr9	113291836	PRPF4	EXON	39	0	0	12	51	51	0	0	0	51	12	51	0	51	chr9_113291836
chr9	113292155	113292155	8.8	8.8%_34r	chr9	113292155	PRPF4	EXON	31	0	0	3	34	31	0	0	0	31	3	34	0	31	chr9_113292155
chr9	113292680	113292680	10.3	10.3%_39r	chr9	113292680	PRPF4	EXON	34	1	0	4	39	30	0	0	0	30	4	39	0	30	chr9_113292680
chr9	113292760	113292760	10	10.0%_30r	chr9	113292760	PRPF4	EXON	27	0	0	3	30	22	0	0	0	22	3	30	0	22	chr9_113292760
chr9	33917645	33917645	8.7	8.7%_23r	chr9	33917645	UBE2R2	EXON	21	0	0	2	23	19	0	0	0	19	2	23	0	19	chr9_33917645
chr9	134030398	134030398	17.2	17.2%_87r	chr9	134030398	BRD3	EXON	0	72	15	0	87	0	86	0	0	86	15	87	0	86	chr9_134030398
chr9	134030608	134030608	7.8	7.8%_103r	chr9	134030608	BRD3	EXON	0	95	8	0	103	1	103	0	0	104	8	103	0	104	chr9_134030608
chr9	134030818	134030818	7.3	7.3%_151r	chr9	134030818	BRD3	EXON	0	140	11	0	151	0	136	0	0	136	11	151	0	136	chr9_134030818
chr9	134030878	134030878	8.8	8.8%_113r	chr9	134030878	BRD3	EXON	0	103	10	0	113	0	153	0	0	153	10	113	0	153	chr9_134030878
chr9	134030879	134030879	20.7	20.7%_121r	chr9	134030879	BRD3	EXON	0	96	25	0	121	0	162	0	0	162	25	121	0	162	chr9_134030879
chr9	134030881	134030881	8.8	8.8%_136r	chr9	134030881	BRD3	EXON	0	124	12	0	136	1	176	0	0	177	12	136	0	177	chr9_134030881
chr9	134030913	134030913	8.2	8.2%_170r	chr9	134030913	BRD3	EXON	0	156	14	0	170	0	185	0	0	185	14	170	0	185	chr9_134030913
chr9	134030925	134030925	17.1	17.1%_187r	chr9	134030925	BRD3	EXON	0	155	32	0	187	0	181	0	0	181	32	187	0	181	chr9_134030925
chr9	134031140	134031140	8.1	8.1%_123r	chr9	134031140	BRD3	EXON	0	113	10	0	123	0	118	0	1	119	10	123	0	119	chr9_134031140
chr9	134032085	134032085	7	7.0%_86r	chr9	134032085	BRD3	EXON	0	80	6	0	86	0	95	0	0	95	6	86	0	95	chr9_134032085
chr9	134032142	134032142	15.9	15.9%_145r	chr9	134032142	BRD3	EXON	0	122	23	0	145	0	158	0	0	158	23	145	0	158	chr9_134032142
chr9	134033196	134033196	6.9	6.9%_29r	chr9	134033196	BRD3	EXON	0	27	2	0	29	0	17	0	0	17	2	29	0	17	chr9_134033196
chr9	134033378	134033378	6.9	6.9%_29r	chr9	134033378	BRD3	EXON	0	27	2	0	29	0	13	0	0	13	2	29	0	13	chr9_134033378
chr9	134036149	134036149	8.1	8.1%_37r	chr9	134036149	BRD3	EXON	0	34	3	0	37	0	17	0	0	17	3	37	0	17	chr9_134036149
chr9	134048094	134048094	6.2	6.2%_32r	chr9	134048094	BRD3	EXON	0	30	2	0	32	0	23	0	0	23	2	32	0	23	chr9_134048094
chr9	134048200	134048200	20	20.0%_25r	chr9	134048200	BRD3	EXON	0	20	5	0	25	0	25	0	0	25	5	25	0	25	chr9_134048200
chr9	105390231	105390231	10	10.0%_20r	chr9	105390231	SLC44A1	EXON	18	0	0	2	20	30	0	0	0	30	2	20	0	30	chr9_105390231
chr9	105391269	105391269	13.6	13.6%_22r	chr9	105391269	SLC44A1	EXON	19	0	0	3	22	15	0	0	0	15	3	22	0	15	chr9_105391269
chr9	105391285	105391285	9.1	9.1%_22r	chr9	105391285	SLC44A1	EXON	20	0	0	2	22	11	0	0	0	11	2	22	0	11	chr9_105391285
chr9	110244188	110244188	17.4	17.4%_855r	chr9	110244188	TXN	EXON	1	705	149	0	855	0	659	1	0	660	149	855	1	660	chr9_110244188
chr9	110244195	110244195	9	9.0%_873r	chr9	110244195	TXN	EXON	1	793	79	0	873	1	658	0	0	659	79	873	0	659	chr9_110244195
chr9	40992433	40992433	23.1	23.1%_26r	chr9	40992433	AQP7P3	INTRON	20	0	0	6	26	20	0	0	0	20	6	26	0	20	chr9_40992433
chr9	65675956	65675956	8.3	8.3%_60r	chr9	65675956	AQP7P3	INTRON	55	0	0	5	60	39	0	0	0	39	5	60	0	39	chr9_65675956
chr9	65682850	65682850	14.3	14.3%_28r	chr9	65682850	AQP7P3	INTRON	24	0	0	4	28	32	0	0	0	32	4	28	0	32	chr9_65682850
chr9	97600623	97600623	14.3	14.3%_42r	chr9	97600623	TSTD2	EXON	0	35	6	1	42	0	30	0	0	30	6	42	0	30	chr9_97600623
chr9	97601556	97601556	19.4	19.4%_31r	chr9	97601556	TSTD2	EXON	0	25	6	0	31	0	27	0	0	27	6	31	0	27	chr9_97601556
chr9	97601894	97601894	11.5	11.5%_26r	chr9	97601894	TSTD2	EXON	0	23	3	0	26	0	19	0	0	19	3	26	0	19	chr9_97601894
chr9	97601916	97601916	46.7	46.7%_30r	chr9	97601916	TSTD2	EXON	0	16	14	0	30	0	20	0	0	20	14	30	0	20	chr9_97601916
chr9	97602146	97602146	19.2	19.2%_26r	chr9	97602146	TSTD2	EXON	0	21	5	0	26	0	22	0	0	22	5	26	0	22	chr9_97602146
chr9	97602412	97602412	11.1	11.1%_27r	chr9	97602412	TSTD2	EXON	0	24	3	0	27	0	36	0	0	36	3	27	0	36	chr9_97602412
chr9	97602635	97602635	14.3	14.3%_21r	chr9	97602635	TSTD2	EXON	0	18	3	0	21	0	15	0	0	15	3	21	0	15	chr9_97602635
chr9	97602732	97602732	16.7	16.7%_42r	chr9	97602732	TSTD2	EXON	0	35	7	0	42	0	37	0	0	37	7	42	0	37	chr9_97602732
chr9	97625709	97625709	15.4	15.4%_26r	chr9	97625709	TSTD2	EXON	0	22	4	0	26	0	19	0	0	19	4	26	0	19	chr9_97625709
chr9	128107119	128107119	9.5	9.5%_21r	chr9	128107119	SLC25A25	EXON	19	0	0	2	21	11	0	0	0	11	2	21	0	11	chr9_128107119
chr9	26841593	26841593	13	13.0%_23r	chr9	26841593	CAAP1	EXON	0	20	3	0	23	0	16	0	0	16	3	23	0	16	chr9_26841593
chr9	15464151	15464151	6.1	6.1%_33r	chr9	15464151	PSIP1	EXON	0	31	2	0	33	0	47	0	0	47	2	33	0	47	chr9_15464151
chr9	15464168	15464168	6.7	6.7%_45r	chr9	15464168	PSIP1	EXON	0	42	3	0	45	0	61	0	0	61	3	45	0	61	chr9_15464168
chr9	15464175	15464175	12.5	12.5%_40r	chr9	15464175	PSIP1	EXON	0	35	5	0	40	0	55	0	0	55	5	40	0	55	chr9_15464175
chr9	15464446	15464446	10	10.0%_40r	chr9	15464446	PSIP1	EXON	0	36	4	0	40	0	33	0	0	33	4	40	0	33	chr9_15464446
chr9	15464546	15464546	9.5	9.5%_21r	chr9	15464546	PSIP1	EXON	0	19	2	0	21	0	19	0	0	19	2	21	0	19	chr9_15464546
chr9	15464653	15464653	17.9	17.9%_28r	chr9	15464653	PSIP1	EXON	0	23	5	0	28	0	42	0	0	42	5	28	0	42	chr9_15464653
chr9	15464703	15464703	9.5	9.5%_21r	chr9	15464703	PSIP1	EXON	0	19	2	0	21	0	21	0	0	21	2	21	0	21	chr9_15464703
chr9	15464790	15464790	9.4	9.4%_64r	chr9	15464790	PSIP1	EXON	0	58	6	0	64	0	84	0	0	84	6	64	0	84	chr9_15464790
chr9	15464973	15464973	28.1	28.1%_32r	chr9	15464973	PSIP1	EXON	0	23	9	0	32	0	35	0	0	35	9	32	0	35	chr9_15464973
chr9	15465493	15465493	6.2	6.2%_32r	chr9	15465493	PSIP1	EXON	0	30	2	0	32	0	33	0	0	33	2	32	0	33	chr9_15465493
chr9	15465525	15465525	15	15.0%_40r	chr9	15465525	PSIP1	EXON	0	34	6	0	40	0	44	0	0	44	6	40	0	44	chr9_15465525
chr9	15465529	15465529	36.6	36.6%_41r	chr9	15465529	PSIP1	EXON	0	26	15	0	41	0	47	0	0	47	15	41	0	47	chr9_15465529
chr9	123147851	123147851	19	19.0%_21r	chr9	123147851	STRBP	EXON	0	17	4	0	21	0	10	0	0	10	4	21	0	10	chr9_123147851
chr9	123159168	123159168	18.2	18.2%_22r	chr9	123159168	STRBP	EXON	0	18	4	0	22	0	18	0	0	18	4	22	0	18	chr9_123159168
chr9	123179114	123179114	8.3	8.3%_24r	chr9	123179114	STRBP	EXON	0	22	2	0	24	0	13	0	0	13	2	24	0	13	chr9_123179114
chr9	132892159	132892159	10	10.0%_20r	chr9	132892159	TSC1	EXON	0	18	2	0	20	0	18	0	0	18	2	20	0	18	chr9_132892159
chr9	132893221	132893221	8.3	8.3%_24r	chr9	132893221	TSC1	EXON	0	22	2	0	24	0	28	0	0	28	2	24	0	28	chr9_132893221
chr9	132893416	132893416	8.3	8.3%_24r	chr9	132893416	TSC1	EXON	0	22	2	0	24	0	18	0	0	18	2	24	0	18	chr9_132893416
chr9	35660753	35660753	11.1	11.1%_45r	chr9	35660753	CCDC107	EXON	40	0	0	5	45	35	0	0	0	35	5	45	0	35	chr9_35660753
chr9	7799618	7799618	10.3	10.3%_29r	chr9	7799618	DMAC1	EXON	0	26	3	0	29	0	16	0	0	16	3	29	0	16	chr9_7799618
chr9	112228460	112228460	14.3	14.3%_21r	chr9	112228460	PTBP3	EXON	0	18	3	0	21	0	14	0	0	14	3	21	0	14	chr9_112228460
chr9	127663269	127663269	7.7	7.7%_26r	chr9	127663269	STXBP1	EXON	24	0	0	2	26	23	0	0	0	23	2	26	0	23	chr9_127663269
chr9	127665255	127665255	15	15.0%_20r	chr9	127665255	STXBP1	EXON	17	0	0	3	20	24	0	0	0	24	3	20	0	24	chr9_127665255
chr9	127673218	127673218	12.5	12.5%_24r	chr9	127673218	STXBP1	EXON	21	0	0	3	24	18	0	0	0	18	3	24	0	18	chr9_127673218
chr9	127691331	127691331	9.1	9.1%_22r	chr9	127691331	STXBP1	EXON	20	0	0	2	22	18	0	0	0	18	2	22	0	18	chr9_127691331
chr9	127691332	127691332	13.6	13.6%_22r	chr9	127691332	STXBP1	EXON	19	0	0	3	22	18	0	0	0	18	3	22	0	18	chr9_127691332
chr9	127691350	127691350	15.4	15.4%_26r	chr9	127691350	STXBP1	EXON	22	0	0	4	26	16	0	0	0	16	4	26	0	16	chr9_127691350
chr9	127691750	127691750	60.7	60.7%_28r	chr9	127691750	STXBP1	EXON	11	0	0	17	28	14	0	0	0	14	17	28	0	14	chr9_127691750
chr9	127691844	127691844	11.1	11.1%_27r	chr9	127691844	STXBP1	EXON	24	0	0	3	27	16	0	0	0	16	3	27	0	16	chr9_127691844
chr9	127691883	127691883	7.7	7.7%_26r	chr9	127691883	STXBP1	EXON	24	0	0	2	26	10	0	0	0	10	2	26	0	10	chr9_127691883
chr9	127691889	127691889	18.5	18.5%_27r	chr9	127691889	STXBP1	EXON	22	0	0	5	27	10	0	0	0	10	5	27	0	10	chr9_127691889
chr9	127691899	127691899	30.8	30.8%_26r	chr9	127691899	STXBP1	EXON	18	0	0	8	26	14	0	0	0	14	8	26	0	14	chr9_127691899
chr9	65675956	65675956	8.3	8.3%_60r	chr9	65675956	LOC101928381	INTRON	55	0	0	5	60	39	0	0	0	39	5	60	0	39	chr9_65675956
chr9	65682850	65682850	14.3	14.3%_28r	chr9	65682850	LOC101928381	INTRON	24	0	0	4	28	32	0	0	0	32	4	28	0	32	chr9_65682850
chr9	75061387	75061387	9.3	9.3%_43r	chr9	75061387	NMRK1	EXON	0	39	4	0	43	0	44	0	0	44	4	43	0	44	chr9_75061387
chr9	75069024	75069024	7.9	7.9%_38r	chr9	75069024	NMRK1	EXON	0	35	3	0	38	0	27	0	0	27	3	38	0	27	chr9_75069024
chr9	34610564	34610564	6.3	6.3%_95r	chr9	34610564	RPP25L	EXON	0	89	6	0	95	0	81	0	0	81	6	95	0	81	chr9_34610564
chr9	34610589	34610589	7.4	7.4%_94r	chr9	34610589	RPP25L	EXON	0	87	7	0	94	0	101	0	0	101	7	94	0	101	chr9_34610589
chr9	34610592	34610592	29.8	29.8%_94r	chr9	34610592	RPP25L	EXON	0	66	28	0	94	0	98	0	0	98	28	94	0	98	chr9_34610592
chr9	34610593	34610593	31.5	31.5%_92r	chr9	34610593	RPP25L	EXON	0	63	29	0	92	0	99	0	0	99	29	92	0	99	chr9_34610593
chr9	34610982	34610982	16.5	16.5%_176r	chr9	34610982	RPP25L	EXON	0	147	29	0	176	0	147	0	0	147	29	176	0	147	chr9_34610982
chr9	34611197	34611197	7.7	7.7%_65r	chr9	34611197	RPP25L	EXON	0	60	5	0	65	0	44	0	0	44	5	65	0	44	chr9_34611197
chr9	34611234	34611234	22.4	22.4%_76r	chr9	34611234	RPP25L	EXON	0	59	17	0	76	0	65	0	0	65	17	76	0	65	chr9_34611234
chr9	34611286	34611286	8.3	8.3%_84r	chr9	34611286	RPP25L	EXON	0	77	7	0	84	0	80	0	0	80	7	84	0	80	chr9_34611286
chr9	125302226	125302226	29.4	29.4%_34r	chr9	125302226	GAPVD1	EXON	24	0	0	10	34	35	0	0	0	35	10	34	0	35	chr9_125302226
chr9	125302231	125302231	16.1	16.1%_31r	chr9	125302231	GAPVD1	EXON	26	0	0	5	31	30	0	0	0	30	5	31	0	30	chr9_125302231
chr9	125307486	125307486	9.4	9.4%_32r	chr9	125307486	GAPVD1	EXON	29	0	0	3	32	44	0	0	0	44	3	32	0	44	chr9_125307486
chr9	125307726	125307726	20	20.0%_20r	chr9	125307726	GAPVD1	EXON	16	0	0	4	20	37	0	0	0	37	4	20	0	37	chr9_125307726
chr9	125312571	125312571	9.1	9.1%_22r	chr9	125312571	GAPVD1	EXON	20	0	0	2	22	26	0	0	0	26	2	22	0	26	chr9_125312571
chr9	125323868	125323868	6.7	6.7%_30r	chr9	125323868	GAPVD1	EXON	28	0	0	2	30	33	0	0	0	33	2	30	0	33	chr9_125323868
chr9	125326418	125326418	7.7	7.7%_39r	chr9	125326418	GAPVD1	EXON	36	0	0	3	39	49	0	0	0	49	3	39	0	49	chr9_125326418
chr9	125326447	125326447	6.7	6.7%_30r	chr9	125326447	GAPVD1	EXON	28	0	0	2	30	41	0	0	0	41	2	30	0	41	chr9_125326447
chr9	125326526	125326526	6.4	6.4%_47r	chr9	125326526	GAPVD1	EXON	44	0	0	3	47	47	0	0	0	47	3	47	0	47	chr9_125326526
chr9	125330184	125330184	7.9	7.9%_38r	chr9	125330184	GAPVD1	EXON	35	0	0	3	38	47	1	0	0	48	3	38	0	48	chr9_125330184
chr9	125360654	125360654	8.7	8.7%_23r	chr9	125360654	GAPVD1	EXON	21	0	0	2	23	28	0	0	0	28	2	23	0	28	chr9_125360654
chr9	37780510	37780510	9.3	9.3%_43r	chr9	37780510	EXOSC3	EXON	0	39	4	0	43	0	45	0	0	45	4	43	0	45	chr9_37780510
chr9	37782054	37782054	22.8	22.8%_136r	chr9	37782054	EXOSC3	EXON	0	105	31	0	136	0	111	0	0	111	31	136	0	111	chr9_37782054
chr9	37782096	37782096	9.1	9.1%_66r	chr9	37782096	EXOSC3	EXON	0	60	6	0	66	0	87	0	0	87	6	66	0	87	chr9_37782096
chr9	37782098	37782098	7.6	7.6%_66r	chr9	37782098	EXOSC3	EXON	0	61	5	0	66	0	87	0	0	87	5	66	0	87	chr9_37782098
chr9	37783930	37783930	24.4	24.4%_86r	chr9	37783930	EXOSC3	EXON	0	65	21	0	86	0	84	0	0	84	21	86	0	84	chr9_37783930
chr9	37784916	37784916	14.6	14.6%_41r	chr9	37784916	EXOSC3	EXON	0	35	6	0	41	0	34	0	0	34	6	41	0	34	chr9_37784916
chr9	131120684	131120684	10	10.0%_20r	chr9	131120684	AIF1L	EXON	18	0	0	2	20	12	0	0	0	12	2	20	0	12	chr9_131120684
chr9	131120747	131120747	8.1	8.1%_37r	chr9	131120747	AIF1L	EXON	34	0	0	3	37	26	0	0	0	26	3	37	0	26	chr9_131120747
chr9	131120940	131120940	10.7	10.7%_28r	chr9	131120940	AIF1L	EXON	25	0	0	3	28	22	0	0	0	22	3	28	0	22	chr9_131120940
chr9	65675956	65675956	8.3	8.3%_60r	chr9	65675956	CBWD5	EXON	55	0	0	5	60	39	0	0	0	39	5	60	0	39	chr9_65675956
chr9	65682850	65682850	14.3	14.3%_28r	chr9	65682850	CBWD5	EXON	24	0	0	4	28	32	0	0	0	32	4	28	0	32	chr9_65682850
chr9	104111693	104111693	11.8	11.8%_34r	chr9	104111693	SMC2	EXON	30	0	0	4	34	34	0	0	0	34	4	34	0	34	chr9_104111693
chr9	104114770	104114770	19.4	19.4%_31r	chr9	104114770	SMC2	EXON	25	0	0	6	31	42	0	0	0	42	6	31	0	42	chr9_104114770
chr9	104118258	104118258	6.1	6.1%_33r	chr9	104118258	SMC2	EXON	31	0	0	2	33	42	0	0	0	42	2	33	0	42	chr9_104118258
chr9	90844245	90844245	8.3	8.3%_24r	chr9	90844245	SYK	EXON	22	0	0	2	24	15	0	0	0	15	2	24	0	15	chr9_90844245
chr9	90844260	90844260	20	20.0%_20r	chr9	90844260	SYK	EXON	16	0	0	4	20	11	0	0	0	11	4	20	0	11	chr9_90844260
chr9	112408942	112408942	25	25.0%_24r	chr9	112408942	HSDL2	EXON	18	0	0	6	24	18	0	0	0	18	6	24	0	18	chr9_112408942
chr9	112416934	112416934	11.8	11.8%_51r	chr9	112416934	HSDL2	EXON	45	0	0	6	51	47	0	0	0	47	6	51	0	47	chr9_112416934
chr9	112418883	112418883	8.2	8.2%_49r	chr9	112418883	HSDL2	EXON	45	0	0	4	49	40	0	0	0	40	4	49	0	40	chr9_112418883
chr9	112418938	112418938	16.7	16.7%_30r	chr9	112418938	HSDL2	EXON	25	0	0	5	30	29	0	0	0	29	5	30	0	29	chr9_112418938
chr9	112441735	112441735	8.7	8.7%_23r	chr9	112441735	HSDL2	EXON	21	0	0	2	23	21	0	0	0	21	2	23	0	21	chr9_112441735
chr9	112471408	112471408	8.7	8.7%_23r	chr9	112471408	HSDL2	EXON	21	0	0	2	23	20	0	0	0	20	2	23	0	20	chr9_112471408
chr9	136849551	136849551	6.9	6.9%_204r	chr9	136849551	PHPT1	EXON	190	0	0	14	204	142	0	0	0	142	14	204	0	142	chr9_136849551
chr9	136849552	136849552	6.9	6.9%_203r	chr9	136849552	PHPT1	EXON	189	0	0	14	203	140	0	0	0	140	14	203	0	140	chr9_136849552
chr9	113267370	113267370	8.7	8.7%_23r	chr9	113267370	CDC26	EXON	0	21	2	0	23	0	30	0	0	30	2	23	0	30	chr9_113267370
chr9	113267379	113267379	6.5	6.5%_31r	chr9	113267379	CDC26	EXON	0	29	2	0	31	0	34	0	0	34	2	31	0	34	chr9_113267379
chr9	113275444	113275444	8.3	8.3%_36r	chr9	113275444	CDC26	EXON	0	33	3	0	36	0	29	0	0	29	3	36	0	29	chr9_113275444
chr9	113275487	113275487	25	25.0%_24r	chr9	113275487	CDC26	EXON	0	18	6	0	24	0	22	0	0	22	6	24	0	22	chr9_113275487
chr9	65675956	65675956	8.3	8.3%_60r	chr9	65675956	CBWD3	INTRON	55	0	0	5	60	39	0	0	0	39	5	60	0	39	chr9_65675956
chr9	65682850	65682850	14.3	14.3%_28r	chr9	65682850	CBWD3	INTRON	24	0	0	4	28	32	0	0	0	32	4	28	0	32	chr9_65682850
chr9	4685050	4685050	10	10.0%_20r	chr9	4685050	CDC37L1	EXON	18	0	0	2	20	28	0	0	0	28	2	20	0	28	chr9_4685050
chr9	4685059	4685059	33.3	33.3%_21r	chr9	4685059	CDC37L1	EXON	14	0	0	7	21	21	0	0	0	21	7	21	0	21	chr9_4685059
chr9	4697141	4697141	7.4	7.4%_27r	chr9	4697141	CDC37L1	EXON	25	0	0	2	27	23	0	0	0	23	2	27	0	23	chr9_4697141
chr9	4697778	4697778	7.4	7.4%_27r	chr9	4697778	CDC37L1	EXON	25	0	0	2	27	15	0	0	0	15	2	27	0	15	chr9_4697778
chr9	4706030	4706030	20	20.0%_30r	chr9	4706030	CDC37L1	EXON	24	0	0	6	30	18	0	0	0	18	6	30	0	18	chr9_4706030
chr9	4706079	4706079	15	15.0%_20r	chr9	4706079	CDC37L1	EXON	17	0	0	3	20	14	0	0	0	14	3	20	0	14	chr9_4706079
chr9	37493666	37493666	6.9	6.9%_29r	chr9	37493666	POLR1E	EXON	27	0	0	2	29	26	0	0	0	26	2	29	0	26	chr9_37493666
chr9	37498109	37498109	6.7	6.7%_30r	chr9	37498109	POLR1E	EXON	28	0	0	2	30	15	0	0	0	15	2	30	0	15	chr9_37498109
chr9	128693757	128693757	8.3	8.3%_168r	chr9	128693757	SET	EXON	154	0	0	14	168	107	0	0	0	107	14	168	0	107	chr9_128693757
chr9	128693967	128693967	46	46.0%_113r	chr9	128693967	SET	EXON	61	0	0	52	113	72	0	0	0	72	52	113	0	72	chr9_128693967
chr9	128694725	128694725	22.7	22.7%_44r	chr9	128694725	SET	EXON	34	0	0	10	44	39	0	0	0	39	10	44	0	39	chr9_128694725
chr9	128694772	128694772	22.5	22.5%_528r	chr9	128694772	SET	EXON	409	0	0	119	528	483	1	0	0	484	119	528	0	484	chr9_128694772
chr9	128694861	128694861	7	7.0%_412r	chr9	128694861	SET	EXON	383	0	0	29	412	372	1	0	0	373	29	412	0	373	chr9_128694861
chr9	128694955	128694955	8.2	8.2%_196r	chr9	128694955	SET	EXON	180	0	0	16	196	205	0	0	0	205	16	196	0	205	chr9_128694955
chr9	128695508	128695508	11	11.0%_172r	chr9	128695508	SET	EXON	153	0	0	19	172	126	0	0	0	126	19	172	0	126	chr9_128695508
chr9	128696169	128696169	6	6.0%_233r	chr9	128696169	SET	EXON	219	0	0	14	233	164	0	0	0	164	14	233	0	164	chr9_128696169
chr9	128696298	128696298	6.3	6.3%_239r	chr9	128696298	SET	EXON	224	0	0	15	239	199	0	0	0	199	15	239	0	199	chr9_128696298
chr9	27566750	27566750	7.4	7.4%_27r	chr9	27566750	C9orf72	EXON	0	25	2	0	27	0	19	0	0	19	2	27	0	19	chr9_27566750
chr9	128515564	128515564	25	25.0%_32r	chr9	128515564	GLE1	EXON	24	0	0	8	32	35	0	0	0	35	8	32	0	35	chr9_128515564
chr9	128515569	128515569	6.5	6.5%_31r	chr9	128515569	GLE1	EXON	29	0	0	2	31	33	0	0	0	33	2	31	0	33	chr9_128515569
chr9	128522712	128522712	30	30.0%_30r	chr9	128522712	GLE1	EXON	21	0	0	9	30	39	0	0	0	39	9	30	0	39	chr9_128522712
chr9	128522781	128522781	12.5	12.5%_24r	chr9	128522781	GLE1	EXON	21	0	0	3	24	31	0	0	0	31	3	24	0	31	chr9_128522781
chr9	128523284	128523284	13.2	13.2%_38r	chr9	128523284	GLE1	EXON	33	0	0	5	38	32	0	0	0	32	5	38	0	32	chr9_128523284
chr9	128523599	128523599	12.1	12.1%_33r	chr9	128523599	GLE1	EXON	28	1	0	4	33	27	0	0	0	27	4	33	0	27	chr9_128523599
chr9	128523645	128523645	10	10.0%_30r	chr9	128523645	GLE1	EXON	27	0	0	3	30	31	0	0	0	31	3	30	0	31	chr9_128523645
chr9	128523695	128523695	8.6	8.6%_35r	chr9	128523695	GLE1	EXON	32	0	0	3	35	38	0	0	0	38	3	35	0	38	chr9_128523695
chr9	128523755	128523755	7.4	7.4%_54r	chr9	128523755	GLE1	EXON	50	0	0	4	54	24	0	0	0	24	4	54	0	24	chr9_128523755
chr9	128523800	128523800	9.1	9.1%_33r	chr9	128523800	GLE1	EXON	29	0	1	3	33	33	0	0	0	33	3	33	0	33	chr9_128523800
chr9	128523811	128523811	6.7	6.7%_30r	chr9	128523811	GLE1	EXON	28	0	0	2	30	39	0	0	0	39	2	30	0	39	chr9_128523811
chr9	128525204	128525204	10.5	10.5%_38r	chr9	128525204	GLE1	EXON	34	0	0	4	38	35	0	0	0	35	4	38	0	35	chr9_128525204
chr9	128525328	128525328	12.5	12.5%_32r	chr9	128525328	GLE1	EXON	28	0	0	4	32	30	0	0	0	30	4	32	0	30	chr9_128525328
chr9	128533894	128533894	7	7.0%_71r	chr9	128533894	GLE1	EXON	66	0	0	5	71	70	0	0	0	70	5	71	0	70	chr9_128533894
chr9	128539661	128539661	13.5	13.5%_37r	chr9	128539661	GLE1	EXON	32	0	0	5	37	33	0	0	0	33	5	37	0	33	chr9_128539661
chr9	128539669	128539669	10.7	10.7%_28r	chr9	128539669	GLE1	EXON	25	0	0	3	28	19	0	0	0	19	3	28	0	19	chr9_128539669
chr9	128539670	128539670	60.7	60.7%_28r	chr9	128539670	GLE1	EXON	11	0	0	17	28	20	0	0	0	20	17	28	0	20	chr9_128539670
chr9	128540281	128540281	8.8	8.8%_34r	chr9	128540281	GLE1	EXON	31	0	0	3	34	34	0	0	0	34	3	34	0	34	chr9_128540281
chr9	128540285	128540285	14.7	14.7%_34r	chr9	128540285	GLE1	EXON	29	0	0	5	34	29	0	0	0	29	5	34	0	29	chr9_128540285
chr9	128540325	128540325	10.5	10.5%_38r	chr9	128540325	GLE1	EXON	34	0	0	4	38	25	0	0	0	25	4	38	0	25	chr9_128540325
chr9	128541233	128541233	6.9	6.9%_29r	chr9	128541233	GLE1	EXON	27	0	0	2	29	34	0	0	0	34	2	29	0	34	chr9_128541233
chr9	128541354	128541354	6.1	6.1%_33r	chr9	128541354	GLE1	EXON	31	0	0	2	33	31	0	0	0	31	2	33	0	31	chr9_128541354
chr9	128541470	128541470	6.5	6.5%_31r	chr9	128541470	GLE1	EXON	29	0	0	2	31	22	0	0	0	22	2	31	0	22	chr9_128541470
chr9	128541484	128541484	12.5	12.5%_32r	chr9	128541484	GLE1	EXON	28	0	0	4	32	25	0	0	0	25	4	32	0	25	chr9_128541484
chr9	128541705	128541705	11.6	11.6%_43r	chr9	128541705	GLE1	EXON	38	0	0	5	43	28	0	0	0	28	5	43	0	28	chr9_128541705
chr9	128541739	128541739	14.3	14.3%_42r	chr9	128541739	GLE1	EXON	36	0	0	6	42	47	0	0	0	47	6	42	0	47	chr9_128541739
chr9	128542056	128542056	12.5	12.5%_32r	chr9	128542056	GLE1	EXON	28	0	0	4	32	39	0	0	0	39	4	32	0	39	chr9_128542056
chr9	128542061	128542061	9.1	9.1%_33r	chr9	128542061	GLE1	EXON	30	0	0	3	33	37	0	0	0	37	3	33	0	37	chr9_128542061
chr9	128542066	128542066	6.9	6.9%_29r	chr9	128542066	GLE1	EXON	27	0	0	2	29	37	0	0	0	37	2	29	0	37	chr9_128542066
chr9	128542121	128542121	13.3	13.3%_45r	chr9	128542121	GLE1	EXON	39	0	0	6	45	42	0	0	0	42	6	45	0	42	chr9_128542121
chr9	128542127	128542127	9.5	9.5%_42r	chr9	128542127	GLE1	EXON	38	0	0	4	42	34	0	0	0	34	4	42	0	34	chr9_128542127
chr9	34657318	34657318	8.7	8.7%_23r	chr9	34657318	IL11RA	EXON	21	0	0	2	23	19	0	0	0	19	2	23	0	19	chr9_34657318
chr9	34657466	34657466	9.7	9.7%_31r	chr9	34657466	IL11RA	EXON	28	0	0	3	31	14	0	0	0	14	3	31	0	14	chr9_34657466
chr9	34657510	34657510	7.7	7.7%_26r	chr9	34657510	IL11RA	EXON	24	0	0	2	26	10	0	0	0	10	2	26	0	10	chr9_34657510
chr9	34658560	34658560	10	10.0%_20r	chr9	34658560	IL11RA	EXON	18	0	0	2	20	11	0	0	0	11	2	20	0	11	chr9_34658560
chr9	34660311	34660311	9.1	9.1%_22r	chr9	34660311	IL11RA	EXON	20	0	0	2	22	17	0	0	0	17	2	22	0	17	chr9_34660311
chr9	34660360	34660360	14.3	14.3%_21r	chr9	34660360	IL11RA	EXON	18	0	0	3	21	10	0	0	0	10	3	21	0	10	chr9_34660360
chr9	34660389	34660389	28.6	28.6%_21r	chr9	34660389	IL11RA	EXON	15	0	0	6	21	11	0	0	0	11	6	21	0	11	chr9_34660389
chr9	34661563	34661563	9.1	9.1%_22r	chr9	34661563	IL11RA	EXON	20	0	0	2	22	13	0	0	0	13	2	22	0	13	chr9_34661563
chr9	34661760	34661760	30	30.0%_20r	chr9	34661760	IL11RA	EXON	14	0	0	6	20	15	0	0	0	15	6	20	0	15	chr9_34661760
chr9	35056711	35056711	27.1	27.1%_48r	chr9	35056711	VCP	EXON	0	35	13	0	48	0	72	0	0	72	13	48	0	72	chr9_35056711
chr9	35056798	35056798	14.7	14.7%_75r	chr9	35056798	VCP	EXON	0	64	11	0	75	0	88	0	0	88	11	75	0	88	chr9_35056798
chr9	35057118	35057118	8.9	8.9%_190r	chr9	35057118	VCP	EXON	0	173	17	0	190	0	202	0	0	202	17	190	0	202	chr9_35057118
chr9	35057165	35057165	7.1	7.1%_211r	chr9	35057165	VCP	EXON	0	196	15	0	211	0	211	0	0	211	15	211	0	211	chr9_35057165
chr9	35059524	35059524	7.2	7.2%_223r	chr9	35059524	VCP	EXON	0	207	16	0	223	1	226	1	0	228	16	223	1	228	chr9_35059524
chr9	35059746	35059746	9.1	9.1%_198r	chr9	35059746	VCP	EXON	0	180	18	0	198	0	187	0	0	187	18	198	0	187	chr9_35059746
chr9	35059793	35059793	33.8	33.8%_148r	chr9	35059793	VCP	EXON	1	95	50	2	148	0	149	0	0	149	50	148	0	149	chr9_35059793
chr9	35060380	35060380	6.4	6.4%_202r	chr9	35060380	VCP	EXON	0	189	13	0	202	1	243	0	1	245	13	202	0	245	chr9_35060380
chr9	35061138	35061138	9	9.0%_200r	chr9	35061138	VCP	EXON	0	182	18	0	200	0	182	0	1	183	18	200	0	183	chr9_35061138
chr9	35061605	35061605	6.5	6.5%_199r	chr9	35061605	VCP	EXON	1	185	13	0	199	0	193	0	0	193	13	199	0	193	chr9_35061605
chr9	35062244	35062244	9.9	9.9%_172r	chr9	35062244	VCP	EXON	0	155	17	0	172	1	180	0	1	182	17	172	0	182	chr9_35062244
chr9	35063037	35063037	9.7	9.7%_196r	chr9	35063037	VCP	EXON	0	177	19	0	196	0	195	0	0	195	19	196	0	195	chr9_35063037
chr9	35063074	35063074	6.7	6.7%_238r	chr9	35063074	VCP	EXON	0	222	16	0	238	0	309	0	0	309	16	238	0	309	chr9_35063074
chr9	35065289	35065289	10.5	10.5%_209r	chr9	35065289	VCP	EXON	0	186	22	1	209	1	180	0	0	181	22	209	0	181	chr9_35065289
chr9	35066676	35066676	43	43.0%_114r	chr9	35066676	VCP	EXON	0	65	49	0	114	0	184	0	0	184	49	114	0	184	chr9_35066676
chr9	35066707	35066707	6.5	6.5%_201r	chr9	35066707	VCP	EXON	0	188	13	0	201	0	218	0	0	218	13	201	0	218	chr9_35066707
chr9	35068003	35068003	7.3	7.3%_124r	chr9	35068003	VCP	EXON	0	115	9	0	124	0	116	0	0	116	9	124	0	116	chr9_35068003
chr9	35072427	35072427	15	15.0%_60r	chr9	35072427	VCP	EXON	0	51	9	0	60	0	55	0	0	55	9	60	0	55	chr9_35072427
chr9	127908570	127908570	12	12.0%_25r	chr9	127908570	ST6GALNAC4	EXON	0	22	3	0	25	0	22	0	0	22	3	25	0	22	chr9_127908570
chr9	21333000	21333000	14.3	14.3%_21r	chr9	21333000	KLHL9	EXON	0	18	3	0	21	0	14	0	0	14	3	21	0	14	chr9_21333000
chr9	21333531	21333531	9.8	9.8%_51r	chr9	21333531	KLHL9	EXON	0	46	5	0	51	0	35	0	0	35	5	51	0	35	chr9_21333531
chr9	21333536	21333536	6.1	6.1%_33r	chr9	21333536	KLHL9	EXON	0	31	2	0	33	0	28	0	0	28	2	33	0	28	chr9_21333536
chr9	21333550	21333550	14.3	14.3%_28r	chr9	21333550	KLHL9	EXON	0	24	4	0	28	0	18	0	0	18	4	28	0	18	chr9_21333550
chr9	21333612	21333612	13.6	13.6%_22r	chr9	21333612	KLHL9	EXON	0	19	3	0	22	0	14	0	0	14	3	22	0	14	chr9_21333612
chr9	21333996	21333996	25	25.0%_20r	chr9	21333996	KLHL9	EXON	0	15	5	0	20	0	21	0	0	21	5	20	0	21	chr9_21333996
chr9	21334067	21334067	13.6	13.6%_22r	chr9	21334067	KLHL9	EXON	0	19	3	0	22	0	18	0	0	18	3	22	0	18	chr9_21334067
chr9	21334089	21334089	15.4	15.4%_26r	chr9	21334089	KLHL9	EXON	0	22	4	0	26	0	15	0	0	15	4	26	0	15	chr9_21334089
chr9	21334561	21334561	14.3	14.3%_21r	chr9	21334561	KLHL9	EXON	0	18	3	0	21	0	15	0	0	15	3	21	0	15	chr9_21334561
chr9	100018259	100018259	20.3	20.3%_64r	chr9	100018259	ERP44	EXON	0	51	13	0	64	0	64	0	0	64	13	64	0	64	chr9_100018259
chr9	100022123	100022123	8.6	8.6%_81r	chr9	100022123	ERP44	EXON	0	74	7	0	81	0	66	0	0	66	7	81	0	66	chr9_100022123
chr9	137241917	137241917	12.9	12.9%_232r	chr9	137241917	TUBB4B	EXON	202	0	0	30	232	210	0	0	1	211	30	232	1	211	chr9_137241917
chr9	137242517	137242517	7.9	7.9%_242r	chr9	137242517	TUBB4B	EXON	223	0	0	19	242	212	0	0	0	212	19	242	0	212	chr9_137242517
chr9	137242766	137242766	8.6	8.6%_362r	chr9	137242766	TUBB4B	EXON	331	0	0	31	362	328	0	0	0	328	31	362	0	328	chr9_137242766
chr9	137243170	137243170	33	33.0%_424r	chr9	137243170	TUBB4B	EXON	284	0	0	140	424	344	0	0	0	344	140	424	0	344	chr9_137243170
chr9	137243380	137243380	18.7	18.7%_305r	chr9	137243380	TUBB4B	EXON	248	0	0	57	305	313	1	0	0	314	57	305	0	314	chr9_137243380
chr9	137243393	137243393	20.2	20.2%_352r	chr9	137243393	TUBB4B	EXON	281	0	0	71	352	361	1	0	0	362	71	352	0	362	chr9_137243393
chr9	129813242	129813242	20	20.0%_25r	chr9	129813242	TOR1A	EXON	0	20	5	0	25	0	17	0	0	17	5	25	0	17	chr9_129813242
chr9	129813342	129813342	6.1	6.1%_49r	chr9	129813342	TOR1A	EXON	0	46	3	0	49	0	40	0	0	40	3	49	0	40	chr9_129813342
chr9	129813375	129813375	47.6	47.6%_42r	chr9	129813375	TOR1A	EXON	0	22	20	0	42	0	46	0	0	46	20	42	0	46	chr9_129813375
chr9	129813468	129813468	33.3	33.3%_42r	chr9	129813468	TOR1A	EXON	0	28	14	0	42	0	51	0	0	51	14	42	0	51	chr9_129813468
chr9	129813663	129813663	16.2	16.2%_68r	chr9	129813663	TOR1A	EXON	0	57	11	0	68	0	51	0	0	51	11	68	0	51	chr9_129813663
chr9	129813862	129813862	7.9	7.9%_76r	chr9	129813862	TOR1A	EXON	0	70	6	0	76	0	74	0	0	74	6	76	0	74	chr9_129813862
chr9	129823970	129823970	7.3	7.3%_82r	chr9	129823970	TOR1A	EXON	0	76	6	0	82	0	85	0	0	85	6	82	0	85	chr9_129823970
chr9	127788094	127788094	6.1	6.1%_33r	chr9	127788094	CDK9	EXON	31	0	0	2	33	44	0	0	0	44	2	33	0	44	chr9_127788094
chr9	127789329	127789329	6.5	6.5%_31r	chr9	127789329	CDK9	EXON	29	0	0	2	31	35	0	0	0	35	2	31	0	35	chr9_127789329
chr9	127789786	127789786	10.3	10.3%_29r	chr9	127789786	CDK9	EXON	26	0	0	3	29	34	0	0	0	34	3	29	0	34	chr9_127789786
chr9	127789890	127789890	12.5	12.5%_24r	chr9	127789890	CDK9	EXON	21	0	0	3	24	26	0	0	0	26	3	24	0	26	chr9_127789890
chr9	120772821	120772821	11.4	11.4%_35r	chr9	120772821	FBXW2	EXON	0	31	4	0	35	0	48	0	0	48	4	35	0	48	chr9_120772821
chr9	120776125	120776125	17.4	17.4%_23r	chr9	120776125	FBXW2	EXON	0	19	4	0	23	0	18	0	0	18	4	23	0	18	chr9_120776125
chr9	120776127	120776127	6.9	6.9%_29r	chr9	120776127	FBXW2	EXON	0	27	2	0	29	0	18	0	0	18	2	29	0	18	chr9_120776127
chr9	120776156	120776156	10.7	10.7%_28r	chr9	120776156	FBXW2	EXON	0	25	3	0	28	0	19	0	0	19	3	28	0	19	chr9_120776156
chr9	120778458	120778458	13.6	13.6%_22r	chr9	120778458	FBXW2	EXON	0	19	3	0	22	0	14	0	0	14	3	22	0	14	chr9_120778458
chr9	120778525	120778525	15.2	15.2%_33r	chr9	120778525	FBXW2	EXON	0	28	5	0	33	0	26	0	0	26	5	33	0	26	chr9_120778525
chr9	120787788	120787788	7	7.0%_43r	chr9	120787788	FBXW2	EXON	0	40	3	0	43	0	29	0	0	29	3	43	0	29	chr9_120787788
chr9	120788004	120788004	7.7	7.7%_39r	chr9	120788004	FBXW2	EXON	0	36	3	0	39	0	38	0	0	38	3	39	0	38	chr9_120788004
chr9	120788006	120788006	20.5	20.5%_39r	chr9	120788006	FBXW2	EXON	0	31	8	0	39	0	39	0	0	39	8	39	0	39	chr9_120788006
chr9	120788028	120788028	9.1	9.1%_22r	chr9	120788028	FBXW2	EXON	0	20	2	0	22	0	19	0	0	19	2	22	0	19	chr9_120788028
chr9	108939392	108939392	8.2	8.2%_73r	chr9	108939392	ABITRAM	EXON	67	0	0	6	73	70	0	0	0	70	6	73	0	70	chr9_108939392
chr9	129637477	129637477	7.9	7.9%_38r	chr9	129637477	ASB6	EXON	0	35	3	0	38	0	42	0	0	42	3	38	0	42	chr9_129637477
chr9	129637653	129637653	6.7	6.7%_30r	chr9	129637653	ASB6	EXON	0	28	2	0	30	0	43	0	0	43	2	30	0	43	chr9_129637653
chr9	121489	121489	8.8	8.8%_125r	chr9	121489	CBWD1	EXON	0	114	11	0	125	0	112	0	0	112	11	125	0	112	chr9_121489
chr9	154764	154764	12.9	12.9%_31r	chr9	154764	CBWD1	EXON	0	27	4	0	31	0	20	0	0	20	4	31	0	20	chr9_154764
chr9	136916557	136916557	7.4	7.4%_27r	chr9	136916557	TRAF2	EXON	25	0	0	2	27	25	0	0	0	25	2	27	0	25	chr9_136916557
chr9	136920488	136920488	7.4	7.4%_27r	chr9	136920488	TRAF2	EXON	25	0	0	2	27	27	0	0	0	27	2	27	0	27	chr9_136920488
chr9	36583645	36583645	6.1	6.1%_33r	chr9	36583645	MELK	EXON	31	0	0	2	33	25	0	0	0	25	2	33	0	25	chr9_36583645
chr9	36594668	36594668	18.2	18.2%_44r	chr9	36594668	MELK	EXON	36	0	0	8	44	46	0	0	0	46	8	44	0	46	chr9_36594668
chr9	36594749	36594749	10.2	10.2%_49r	chr9	36594749	MELK	EXON	44	0	0	5	49	52	1	0	0	53	5	49	0	53	chr9_36594749
chr9	36594757	36594757	6.5	6.5%_46r	chr9	36594757	MELK	EXON	43	0	0	3	46	45	0	0	0	45	3	46	0	45	chr9_36594757
chr9	36597282	36597282	8.3	8.3%_60r	chr9	36597282	MELK	EXON	55	0	0	5	60	48	0	0	0	48	5	60	0	48	chr9_36597282
chr9	36633112	36633112	11.8	11.8%_34r	chr9	36633112	MELK	EXON	30	0	0	4	34	28	0	0	0	28	4	34	0	28	chr9_36633112
chr9	36651750	36651750	6.8	6.8%_44r	chr9	36651750	MELK	EXON	41	0	0	3	44	47	0	0	0	47	3	44	0	47	chr9_36651750
chr9	36651787	36651787	6.7	6.7%_45r	chr9	36651787	MELK	EXON	42	0	0	3	45	52	0	0	0	52	3	45	0	52	chr9_36651787
chr9	36651876	36651876	6.6	6.6%_61r	chr9	36651876	MELK	EXON	57	0	0	4	61	58	0	0	0	58	4	61	0	58	chr9_36651876
chr9	36657274	36657274	22.6	22.6%_31r	chr9	36657274	MELK	EXON	24	0	0	7	31	36	0	0	0	36	7	31	0	36	chr9_36657274
chr9	36657346	36657346	9.8	9.8%_51r	chr9	36657346	MELK	EXON	46	0	0	5	51	49	0	0	0	49	5	51	0	49	chr9_36657346
chr9	36665416	36665416	6.3	6.3%_63r	chr9	36665416	MELK	EXON	59	0	0	4	63	42	0	0	0	42	4	63	0	42	chr9_36665416
chr9	36671126	36671126	11.3	11.3%_71r	chr9	36671126	MELK	EXON	63	0	0	8	71	55	0	0	0	55	8	71	0	55	chr9_36671126
chr9	36674858	36674858	6.5	6.5%_93r	chr9	36674858	MELK	EXON	87	0	0	6	93	86	0	0	0	86	6	93	0	86	chr9_36674858
chr9	36677260	36677260	11.9	11.9%_59r	chr9	36677260	MELK	EXON	52	0	0	7	59	50	0	0	0	50	7	59	0	50	chr9_36677260
chr9	36677276	36677276	12.7	12.7%_55r	chr9	36677276	MELK	EXON	48	0	0	7	55	45	0	0	0	45	7	55	0	45	chr9_36677276
chr9	36677310	36677310	11.1	11.1%_54r	chr9	36677310	MELK	EXON	48	0	0	6	54	58	0	1	0	59	6	54	0	59	chr9_36677310
chr9	36677593	36677593	14.7	14.7%_34r	chr9	36677593	MELK	EXON	29	0	0	5	34	39	0	0	0	39	5	34	0	39	chr9_36677593
chr9	125149256	125149256	9.5	9.5%_21r	chr9	125149256	PPP6C	EXON	0	19	2	0	21	0	24	0	0	24	2	21	0	24	chr9_125149256
chr9	37432084	37432084	8.2	8.2%_243r	chr9	37432084	GRHPR	EXON	222	0	1	20	243	184	0	0	0	184	20	243	0	184	chr9_37432084
chr9	37436874	37436874	26.3	26.3%_213r	chr9	37436874	GRHPR	EXON	157	0	0	56	213	179	0	0	0	179	56	213	0	179	chr9_37436874
chr9	37436879	37436879	31.7	31.7%_189r	chr9	37436879	GRHPR	EXON	129	0	0	60	189	141	1	0	0	142	60	189	0	142	chr9_37436879
chr9	124347779	124347779	10	10.0%_20r	chr9	124347779	NEK6	EXON	18	0	0	2	20	27	0	0	0	27	2	20	0	27	chr9_124347779
chr9	124347812	124347812	28.6	28.6%_21r	chr9	124347812	NEK6	EXON	15	0	0	6	21	34	0	0	0	34	6	21	0	34	chr9_124347812
chr9	124351190	124351190	9.7	9.7%_31r	chr9	124351190	NEK6	EXON	28	0	0	3	31	32	0	0	0	32	3	31	0	32	chr9_124351190
chr9	124351301	124351301	25	25.0%_20r	chr9	124351301	NEK6	EXON	15	0	0	5	20	26	0	0	0	26	5	20	0	26	chr9_124351301
chr9	124351409	124351409	7.1	7.1%_28r	chr9	124351409	NEK6	EXON	26	0	0	2	28	40	0	0	0	40	2	28	0	40	chr9_124351409
chr9	76385737	76385737	6.1	6.1%_33r	chr9	76385737	RFK	EXON	0	31	2	0	33	0	25	0	0	25	2	33	0	25	chr9_76385737
chr9	76385748	76385748	21.2	21.2%_33r	chr9	76385748	RFK	EXON	0	26	7	0	33	0	18	0	0	18	7	33	0	18	chr9_76385748
chr9	76385750	76385750	6.1	6.1%_33r	chr9	76385750	RFK	EXON	0	31	2	0	33	0	17	0	0	17	2	33	0	17	chr9_76385750
chr9	76385948	76385948	12.1	12.1%_33r	chr9	76385948	RFK	EXON	0	29	4	0	33	0	30	0	0	30	4	33	0	30	chr9_76385948
chr9	76385951	76385951	7.9	7.9%_38r	chr9	76385951	RFK	EXON	0	35	3	0	38	0	31	0	0	31	3	38	0	31	chr9_76385951
chr9	76386622	76386622	7.1	7.1%_28r	chr9	76386622	RFK	EXON	0	26	2	0	28	0	23	0	0	23	2	28	0	23	chr9_76386622
chr9	76386774	76386774	9.4	9.4%_32r	chr9	76386774	RFK	EXON	0	29	3	0	32	0	21	0	0	21	3	32	0	21	chr9_76386774
chr9	76386820	76386820	12.5	12.5%_32r	chr9	76386820	RFK	EXON	0	28	4	0	32	0	26	0	0	26	4	32	0	26	chr9_76386820
chr9	76386851	76386851	6.7	6.7%_30r	chr9	76386851	RFK	EXON	0	28	2	0	30	0	15	0	0	15	2	30	0	15	chr9_76386851
chr9	76386915	76386915	12.5	12.5%_24r	chr9	76386915	RFK	EXON	0	21	3	0	24	0	12	0	0	12	3	24	0	12	chr9_76386915
chr9	76387118	76387118	21.6	21.6%_51r	chr9	76387118	RFK	EXON	0	40	11	0	51	0	36	0	0	36	11	51	0	36	chr9_76387118
chr9	76387318	76387318	20.6	20.6%_34r	chr9	76387318	RFK	EXON	0	27	7	0	34	0	33	0	0	33	7	34	0	33	chr9_76387318
chr9	76387477	76387477	6.5	6.5%_31r	chr9	76387477	RFK	EXON	0	29	2	0	31	0	18	0	0	18	2	31	0	18	chr9_76387477
chr9	76387500	76387500	6.8	6.8%_44r	chr9	76387500	RFK	EXON	0	41	3	0	44	0	35	0	0	35	3	44	0	35	chr9_76387500
chr9	125236802	125236802	8.5	8.5%_366r	chr9	125236802	HSPA5	EXON	0	335	31	0	366	0	263	0	0	263	31	366	0	263	chr9_125236802
chr9	125240854	125240854	7	7.0%_459r	chr9	125240854	HSPA5	EXON	0	425	32	2	459	0	356	0	1	357	32	459	0	357	chr9_125240854
chr9	125241201	125241201	9.1	9.1%_209r	chr9	125241201	HSPA5	EXON	0	190	19	0	209	0	130	0	0	130	19	209	0	130	chr9_125241201
chr9	101390223	101390223	6.3	6.3%_63r	chr9	101390223	MRPL50	EXON	0	59	4	0	63	1	59	0	0	60	4	63	0	60	chr9_101390223
chr9	114587804	114587804	8.1	8.1%_172r	chr9	114587804	ATP6V1G1	EXON	158	0	0	14	172	107	0	0	0	107	14	172	0	107	chr9_114587804
chr9	129088985	129088985	8	8.0%_25r	chr9	129088985	DOLPP1	EXON	23	0	0	2	25	25	0	0	0	25	2	25	0	25	chr9_129088985
chr9	83939339	83939339	6.1	6.1%_33r	chr9	83939339	C9orf64	EXON	0	31	2	0	33	0	31	0	0	31	2	33	0	31	chr9_83939339
chr9	83939412	83939412	7.7	7.7%_26r	chr9	83939412	C9orf64	EXON	0	24	2	0	26	0	23	0	0	23	2	26	0	23	chr9_83939412
chr9	83939702	83939702	6.2	6.2%_32r	chr9	83939702	C9orf64	EXON	0	29	2	1	32	0	25	0	0	25	2	32	0	25	chr9_83939702
chr9	83955613	83955613	8.1	8.1%_62r	chr9	83955613	C9orf64	EXON	1	56	5	0	62	0	32	0	0	32	5	62	0	32	chr9_83955613
chr9	113260336	113260336	17	17.0%_100r	chr9	113260336	SLC31A1	EXON	83	0	0	17	100	84	0	0	0	84	17	100	0	84	chr9_113260336
chr9	113260897	113260897	6	6.0%_50r	chr9	113260897	SLC31A1	EXON	46	0	1	3	50	30	0	0	0	30	3	50	0	30	chr9_113260897
chr9	113261147	113261147	7.1	7.1%_28r	chr9	113261147	SLC31A1	EXON	26	0	0	2	28	26	0	0	0	26	2	28	0	26	chr9_113261147
chr9	113261151	113261151	8.8	8.8%_34r	chr9	113261151	SLC31A1	EXON	31	0	0	3	34	30	0	0	0	30	3	34	0	30	chr9_113261151
chr9	113261312	113261312	38.1	38.1%_63r	chr9	113261312	SLC31A1	EXON	39	0	0	24	63	60	0	0	0	60	24	63	0	60	chr9_113261312
chr9	113261644	113261644	10	10.0%_20r	chr9	113261644	SLC31A1	EXON	18	0	0	2	20	14	0	0	0	14	2	20	0	14	chr9_113261644
chr9	113261836	113261836	9.1	9.1%_22r	chr9	113261836	SLC31A1	EXON	20	0	0	2	22	10	0	0	0	10	2	22	0	10	chr9_113261836
chr9	113261868	113261868	15	15.0%_20r	chr9	113261868	SLC31A1	EXON	17	0	0	3	20	13	0	0	0	13	3	20	0	13	chr9_113261868
chr9	113261914	113261914	14.7	14.7%_34r	chr9	113261914	SLC31A1	EXON	29	0	0	5	34	25	0	0	0	25	5	34	0	25	chr9_113261914
chr9	113261995	113261995	8.7	8.7%_23r	chr9	113261995	SLC31A1	EXON	21	0	0	2	23	25	0	0	0	25	2	23	0	25	chr9_113261995
chr9	113262216	113262216	32.3	32.3%_31r	chr9	113262216	SLC31A1	EXON	21	0	0	10	31	27	0	0	0	27	10	31	0	27	chr9_113262216
chr9	113262304	113262304	31	31.0%_29r	chr9	113262304	SLC31A1	EXON	20	0	0	9	29	25	0	0	0	25	9	29	0	25	chr9_113262304
chr9	113262310	113262310	13.3	13.3%_30r	chr9	113262310	SLC31A1	EXON	26	0	0	4	30	25	0	0	0	25	4	30	0	25	chr9_113262310
chr9	113262338	113262338	29.4	29.4%_34r	chr9	113262338	SLC31A1	EXON	24	0	0	10	34	27	0	0	0	27	10	34	0	27	chr9_113262338
chr9	113262452	113262452	8.3	8.3%_36r	chr9	113262452	SLC31A1	EXON	33	0	0	3	36	14	0	0	0	14	3	36	0	14	chr9_113262452
chr9	113262656	113262656	15.4	15.4%_26r	chr9	113262656	SLC31A1	EXON	22	0	0	4	26	23	0	0	0	23	4	26	0	23	chr9_113262656
chr9	113262751	113262751	13.8	13.8%_29r	chr9	113262751	SLC31A1	EXON	25	0	0	4	29	22	0	0	0	22	4	29	0	22	chr9_113262751
chr9	113263079	113263079	16.7	16.7%_24r	chr9	113263079	SLC31A1	EXON	20	0	0	4	24	11	0	0	0	11	4	24	0	11	chr9_113263079
chr9	113263427	113263427	14.3	14.3%_21r	chr9	113263427	SLC31A1	EXON	18	0	0	3	21	19	0	0	0	19	3	21	0	19	chr9_113263427
chr9	113263637	113263637	10	10.0%_50r	chr9	113263637	SLC31A1	EXON	45	0	0	5	50	31	0	0	0	31	5	50	0	31	chr9_113263637
chr9	113263691	113263691	20	20.0%_20r	chr9	113263691	SLC31A1	EXON	16	0	0	4	20	14	0	0	0	14	4	20	0	14	chr9_113263691
chr9	113263906	113263906	12.9	12.9%_31r	chr9	113263906	SLC31A1	EXON	27	0	0	4	31	25	0	0	0	25	4	31	0	25	chr9_113263906
chr9	113264416	113264416	7.4	7.4%_27r	chr9	113264416	SLC31A1	EXON	25	0	0	2	27	12	0	0	0	12	2	27	0	12	chr9_113264416
chr9	92611365	92611365	11.5	11.5%_26r	chr9	92611365	CENPP	EXON	23	0	0	3	26	26	0	0	0	26	3	26	0	26	chr9_92611365
chr9	92611377	92611377	13	13.0%_23r	chr9	92611377	CENPP	EXON	20	0	0	3	23	24	0	0	0	24	3	23	0	24	chr9_92611377
chr9	92613080	92613080	28.6	28.6%_21r	chr9	92613080	CENPP	EXON	15	0	0	6	21	14	0	0	0	14	6	21	0	14	chr9_92613080
chr9	92613110	92613110	18.5	18.5%_27r	chr9	92613110	CENPP	EXON	22	0	0	5	27	20	0	0	0	20	5	27	0	20	chr9_92613110
chr9	92613111	92613111	8.3	8.3%_24r	chr9	92613111	CENPP	EXON	22	0	0	2	24	16	0	0	0	16	2	24	0	16	chr9_92613111
chr9	128822584	128822584	7.9	7.9%_38r	chr9	128822584	ENDOG	EXON	35	0	0	3	38	27	0	0	0	27	3	38	0	27	chr9_128822584
chr9	111553305	111553305	13.6	13.6%_22r	chr9	111553305	ZNF483	EXON	19	0	0	3	22	31	0	0	0	31	3	22	0	31	chr9_111553305
chr9	127872709	127872709	6.2	6.2%_97r	chr9	127872709	AK1	EXON	0	91	6	0	97	0	74	0	0	74	6	97	0	74	chr9_127872709
chr9	127872817	127872817	24.1	24.1%_174r	chr9	127872817	AK1	EXON	0	132	42	0	174	0	130	0	1	131	42	174	0	131	chr9_127872817
chr9	128265595	128265595	9.1	9.1%_22r	chr9	128265595	GOLGA2	EXON	0	20	2	0	22	0	13	0	0	13	2	22	0	13	chr9_128265595
chr9	35813491	35813491	7.1	7.1%_182r	chr9	35813491	HINT2	EXON	1	168	13	0	182	0	141	0	0	141	13	182	0	141	chr9_35813491
chr9	35813681	35813681	15.7	15.7%_108r	chr9	35813681	HINT2	EXON	0	91	17	0	108	0	132	0	0	132	17	108	0	132	chr9_35813681
chr9	128946171	128946171	7	7.0%_43r	chr9	128946171	DOLK	EXON	0	40	3	0	43	0	26	0	0	26	3	43	0	26	chr9_128946171
chr9	128946806	128946806	6.2	6.2%_32r	chr9	128946806	DOLK	EXON	0	30	2	0	32	0	16	0	0	16	2	32	0	16	chr9_128946806
chr9	128946959	128946959	8.3	8.3%_24r	chr9	128946959	DOLK	EXON	0	22	2	0	24	0	20	0	0	20	2	24	0	20	chr9_128946959
chr5	163516555	163516555	38.1	38.1%_118r	chr5	163516555	MAT2B	EXON	73	0	0	45	118	111	0	0	0	111	45	118	0	111	chr5_163516555
chr5	163516563	163516563	26	26.0%_96r	chr5	163516563	MAT2B	EXON	71	0	0	25	96	95	0	0	0	95	25	96	0	95	chr5_163516563
chr5	163518239	163518239	10.1	10.1%_79r	chr5	163518239	MAT2B	EXON	71	0	0	8	79	70	0	0	0	70	8	79	0	70	chr5_163518239
chr5	163518659	163518659	13	13.0%_115r	chr5	163518659	MAT2B	EXON	100	0	0	15	115	90	0	0	0	90	15	115	0	90	chr5_163518659
chr5	163518785	163518785	6.3	6.3%_111r	chr5	163518785	MAT2B	EXON	104	0	0	7	111	102	0	0	0	102	7	111	0	102	chr5_163518785
chr5	163518926	163518926	15	15.0%_153r	chr5	163518926	MAT2B	EXON	130	0	0	23	153	126	0	0	0	126	23	153	0	126	chr5_163518926
chr5	163519276	163519276	32.7	32.7%_52r	chr5	163519276	MAT2B	EXON	35	0	0	17	52	47	0	0	0	47	17	52	0	47	chr5_163519276
chr5	163519283	163519283	50	50.0%_30r	chr5	163519283	MAT2B	EXON	15	0	0	15	30	34	0	0	0	34	15	30	0	34	chr5_163519283
chr5	140647841	140647841	30	30.0%_60r	chr5	140647841	IK	EXON	42	0	0	18	60	48	0	0	0	48	18	60	0	48	chr5_140647841
chr5	140653107	140653107	8.6	8.6%_209r	chr5	140653107	IK	EXON	189	2	0	18	209	225	0	0	1	226	18	209	1	226	chr5_140653107
chr5	140653141	140653141	7.5	7.5%_226r	chr5	140653141	IK	EXON	209	0	0	17	226	186	0	0	0	186	17	226	0	186	chr5_140653141
chr5	140655954	140655954	17.6	17.6%_199r	chr5	140655954	IK	EXON	162	0	2	35	199	229	1	0	0	230	35	199	0	230	chr5_140655954
chr5	140659004	140659004	23.8	23.8%_206r	chr5	140659004	IK	EXON	157	0	0	49	206	224	0	0	0	224	49	206	0	224	chr5_140659004
chr5	140659006	140659006	8.1	8.1%_197r	chr5	140659006	IK	EXON	181	0	0	16	197	200	0	0	0	200	16	197	0	200	chr5_140659006
chr5	140659010	140659010	18	18.0%_189r	chr5	140659010	IK	EXON	155	0	0	34	189	205	0	0	0	205	34	189	0	205	chr5_140659010
chr5	140659136	140659136	13.6	13.6%_154r	chr5	140659136	IK	EXON	133	0	0	21	154	144	0	0	0	144	21	154	0	144	chr5_140659136
chr5	140659155	140659155	8.4	8.4%_191r	chr5	140659155	IK	EXON	175	0	0	16	191	185	0	0	0	185	16	191	0	185	chr5_140659155
chr5	140659783	140659783	44.4	44.4%_142r	chr5	140659783	IK	EXON	79	0	0	63	142	124	0	0	0	124	63	142	0	124	chr5_140659783
chr5	140660178	140660178	7.4	7.4%_231r	chr5	140660178	IK	EXON	214	0	0	17	231	222	0	0	0	222	17	231	0	222	chr5_140660178
chr5	140660768	140660768	7.9	7.9%_277r	chr5	140660768	IK	EXON	254	0	1	22	277	200	0	0	0	200	22	277	0	200	chr5_140660768
chr5	140661672	140661672	37.2	37.2%_188r	chr5	140661672	IK	EXON	118	0	0	70	188	171	0	0	0	171	70	188	0	171	chr5_140661672
chr5	60599099	60599099	9.5	9.5%_21r	chr5	60599099	DEPDC1B	EXON	0	19	2	0	21	0	14	0	0	14	2	21	0	14	chr5_60599099
chr5	60638812	60638812	10	10.0%_20r	chr5	60638812	DEPDC1B	EXON	0	18	2	0	20	0	21	0	0	21	2	20	0	21	chr5_60638812
chr5	60686982	60686982	14.3	14.3%_21r	chr5	60686982	DEPDC1B	EXON	0	18	3	0	21	0	13	0	0	13	3	21	0	13	chr5_60686982
chr5	150535802	150535802	10	10.0%_20r	chr5	150535802	NDST1	EXON	18	0	0	2	20	10	0	0	0	10	2	20	0	10	chr5_150535802
chr5	76833591	76833591	6.2	6.2%_32r	chr5	76833591	F2RL1	EXON	30	0	0	2	32	29	0	0	0	29	2	32	0	29	chr5_76833591
chr5	76833835	76833835	13.3	13.3%_30r	chr5	76833835	F2RL1	EXON	26	0	0	4	30	27	0	0	0	27	4	30	0	27	chr5_76833835
chr5	76834751	76834751	16.7	16.7%_24r	chr5	76834751	F2RL1	EXON	20	0	0	4	24	21	0	0	0	21	4	24	0	21	chr5_76834751
chr5	64769047	64769047	7.5	7.5%_40r	chr5	64769047	CWC27	EXON	36	0	1	3	40	22	0	0	0	22	3	40	0	22	chr5_64769047
chr5	64769074	64769074	11.8	11.8%_51r	chr5	64769074	CWC27	EXON	45	0	0	6	51	52	0	0	0	52	6	51	0	52	chr5_64769074
chr5	64800316	64800316	26.5	26.5%_34r	chr5	64800316	CWC27	EXON	25	0	0	9	34	35	0	0	0	35	9	34	0	35	chr5_64800316
chr5	65018377	65018377	9.5	9.5%_21r	chr5	65018377	CWC27	EXON	19	0	0	2	21	17	0	0	0	17	2	21	0	17	chr5_65018377
chr5	177592581	177592581	7.4	7.4%_282r	chr5	177592581	TMED9	EXON	261	0	0	21	282	182	0	0	0	182	21	282	0	182	chr5_177592581
chr5	177594278	177594278	9.1	9.1%_361r	chr5	177594278	TMED9	EXON	327	1	0	33	361	243	0	0	0	243	33	361	0	243	chr5_177594278
chr5	177595370	177595370	11.3	11.3%_291r	chr5	177595370	TMED9	EXON	258	0	0	33	291	174	0	0	0	174	33	291	0	174	chr5_177595370
chr5	177595555	177595555	9.7	9.7%_300r	chr5	177595555	TMED9	EXON	271	0	0	29	300	174	0	0	0	174	29	300	0	174	chr5_177595555
chr5	177595805	177595805	10.5	10.5%_172r	chr5	177595805	TMED9	EXON	154	0	0	18	172	105	0	0	0	105	18	172	0	105	chr5_177595805
chr5	177596038	177596038	11.3	11.3%_141r	chr5	177596038	TMED9	EXON	125	0	0	16	141	107	0	0	0	107	16	141	0	107	chr5_177596038
chr5	141620978	141620978	17.4	17.4%_46r	chr5	141620978	HDAC3	EXON	0	38	8	0	46	0	50	0	0	50	8	46	0	50	chr5_141620978
chr5	141621055	141621055	24.4	24.4%_45r	chr5	141621055	HDAC3	EXON	0	34	11	0	45	0	36	0	0	36	11	45	0	36	chr5_141621055
chr5	141621288	141621288	7.5	7.5%_80r	chr5	141621288	HDAC3	EXON	0	74	6	0	80	0	80	0	0	80	6	80	0	80	chr5_141621288
chr5	141626244	141626244	6.8	6.8%_88r	chr5	141626244	HDAC3	EXON	0	82	6	0	88	0	75	0	0	75	6	88	0	75	chr5_141626244
chr5	141628630	141628630	16.3	16.3%_98r	chr5	141628630	HDAC3	EXON	0	82	16	0	98	0	77	0	0	77	16	98	0	77	chr5_141628630
chr5	103276192	103276192	6.2	6.2%_32r	chr5	103276192	MACIR	EXON	30	0	0	2	32	13	0	0	0	13	2	32	0	13	chr5_103276192
chr5	103276207	103276207	9.1	9.1%_33r	chr5	103276207	MACIR	EXON	30	0	0	3	33	19	0	0	0	19	3	33	0	19	chr5_103276207
chr5	146455182	146455182	13.3	13.3%_60r	chr5	146455182	TCERG1	EXON	52	0	0	8	60	59	0	0	0	59	8	60	0	59	chr5_146455182
chr5	146458971	146458971	33.9	33.9%_59r	chr5	146458971	TCERG1	EXON	39	0	0	20	59	99	0	0	0	99	20	59	0	99	chr5_146458971
chr5	146478624	146478624	19.4	19.4%_31r	chr5	146478624	TCERG1	EXON	25	0	0	6	31	27	0	0	0	27	6	31	0	27	chr5_146478624
chr5	146478627	146478627	6.9	6.9%_29r	chr5	146478627	TCERG1	EXON	27	0	0	2	29	27	0	0	0	27	2	29	0	27	chr5_146478627
chr5	146478628	146478628	25	25.0%_28r	chr5	146478628	TCERG1	EXON	21	0	0	7	28	26	0	0	0	26	7	28	0	26	chr5_146478628
chr5	146492944	146492944	6.9	6.9%_58r	chr5	146492944	TCERG1	EXON	54	0	0	4	58	43	0	0	0	43	4	58	0	43	chr5_146492944
chr5	146510959	146510959	16.1	16.1%_31r	chr5	146510959	TCERG1	EXON	26	0	0	5	31	26	0	0	0	26	5	31	0	26	chr5_146510959
chr5	146511240	146511240	15.2	15.2%_66r	chr5	146511240	TCERG1	EXON	56	0	0	10	66	55	0	0	0	55	10	66	0	55	chr5_146511240
chr5	146511324	146511324	11.3	11.3%_71r	chr5	146511324	TCERG1	EXON	63	0	0	8	71	73	0	0	0	73	8	71	0	73	chr5_146511324
chr5	140527958	140527958	20	20.0%_25r	chr5	140527958	ANKHD1	EXON	20	0	0	5	25	27	0	0	0	27	5	25	0	27	chr5_140527958
chr5	134402494	134402494	12.7	12.7%_55r	chr5	134402494	CDKN2AIPNL	EXON	0	48	7	0	55	0	52	0	0	52	7	55	0	52	chr5_134402494
chr5	177064624	177064624	10	10.0%_50r	chr5	177064624	ZNF346	EXON	44	0	1	5	50	40	0	0	0	40	5	50	0	40	chr5_177064624
chr5	177064731	177064731	14.3	14.3%_35r	chr5	177064731	ZNF346	EXON	30	0	0	5	35	42	0	0	0	42	5	35	0	42	chr5_177064731
chr5	177064814	177064814	26.7	26.7%_30r	chr5	177064814	ZNF346	EXON	22	0	0	8	30	41	0	0	0	41	8	30	0	41	chr5_177064814
chr5	177065353	177065353	10.9	10.9%_46r	chr5	177065353	ZNF346	EXON	41	0	0	5	46	39	0	0	0	39	5	46	0	39	chr5_177065353
chr5	177065482	177065482	7.8	7.8%_51r	chr5	177065482	ZNF346	EXON	46	1	0	4	51	29	0	0	0	29	4	51	0	29	chr5_177065482
chr5	177065536	177065536	7.7	7.7%_39r	chr5	177065536	ZNF346	EXON	36	0	0	3	39	41	0	0	0	41	3	39	0	41	chr5_177065536
chr5	177065579	177065579	8.7	8.7%_46r	chr5	177065579	ZNF346	EXON	42	0	0	4	46	26	0	0	0	26	4	46	0	26	chr5_177065579
chr5	177065580	177065580	21.7	21.7%_46r	chr5	177065580	ZNF346	EXON	36	0	0	10	46	26	0	0	0	26	10	46	0	26	chr5_177065580
chr5	177065696	177065696	7.7	7.7%_39r	chr5	177065696	ZNF346	EXON	36	0	0	3	39	25	0	0	0	25	3	39	0	25	chr5_177065696
chr5	177065710	177065710	32.4	32.4%_34r	chr5	177065710	ZNF346	EXON	23	0	0	11	34	19	0	0	0	19	11	34	0	19	chr5_177065710
chr5	177065722	177065722	14.8	14.8%_27r	chr5	177065722	ZNF346	EXON	23	0	0	4	27	19	0	0	0	19	4	27	0	19	chr5_177065722
chr5	177065748	177065748	21.7	21.7%_23r	chr5	177065748	ZNF346	EXON	18	0	0	5	23	35	0	0	0	35	5	23	0	35	chr5_177065748
chr5	177065773	177065773	7.4	7.4%_27r	chr5	177065773	ZNF346	EXON	25	0	0	2	27	25	1	0	0	26	2	27	0	26	chr5_177065773
chr5	177065780	177065780	40.7	40.7%_27r	chr5	177065780	ZNF346	EXON	16	0	0	11	27	29	0	0	0	29	11	27	0	29	chr5_177065780
chr5	116293014	116293014	41.2	41.2%_34r	chr5	116293014	COMMD10	EXON	20	0	0	14	34	18	0	0	0	18	14	34	0	18	chr5_116293014
chr5	175959621	175959621	20	20.0%_25r	chr5	175959621	THOC3	EXON	0	20	5	0	25	0	28	0	0	28	5	25	0	28	chr5_175959621
chr5	175959801	175959801	6.7	6.7%_30r	chr5	175959801	THOC3	EXON	0	28	2	0	30	0	32	0	0	32	2	30	0	32	chr5_175959801
chr5	175960039	175960039	12.9	12.9%_31r	chr5	175960039	THOC3	EXON	0	27	4	0	31	0	27	0	0	27	4	31	0	27	chr5_175960039
chr5	175960117	175960117	14.3	14.3%_98r	chr5	175960117	THOC3	EXON	0	84	14	0	98	0	109	0	0	109	14	98	0	109	chr5_175960117
chr5	175961341	175961341	7.4	7.4%_27r	chr5	175961341	THOC3	EXON	0	25	2	0	27	0	18	0	0	18	2	27	0	18	chr5_175961341
chr5	175961372	175961372	13.5	13.5%_37r	chr5	175961372	THOC3	EXON	0	32	5	0	37	0	16	0	0	16	5	37	0	16	chr5_175961372
chr5	175964964	175964964	11.5	11.5%_26r	chr5	175964964	THOC3	EXON	0	23	3	0	26	0	19	0	0	19	3	26	0	19	chr5_175964964
chr5	178138127	178138127	10	10.0%_20r	chr5	178138127	RMND5B	EXON	18	0	0	2	20	25	0	0	0	25	2	20	0	25	chr5_178138127
chr5	178142714	178142714	14.6	14.6%_41r	chr5	178142714	RMND5B	EXON	35	0	0	6	41	37	0	0	0	37	6	41	0	37	chr5_178142714
chr5	178142944	178142944	19.4	19.4%_31r	chr5	178142944	RMND5B	EXON	25	0	0	6	31	33	0	0	0	33	6	31	0	33	chr5_178142944
chr5	178142979	178142979	6.9	6.9%_29r	chr5	178142979	RMND5B	EXON	27	0	0	2	29	34	0	0	0	34	2	29	0	34	chr5_178142979
chr5	178143658	178143658	6.7	6.7%_30r	chr5	178143658	RMND5B	EXON	28	0	0	2	30	27	0	0	0	27	2	30	0	27	chr5_178143658
chr5	178143671	178143671	8.6	8.6%_35r	chr5	178143671	RMND5B	EXON	32	0	0	3	35	34	0	0	0	34	3	35	0	34	chr5_178143671
chr5	178143707	178143707	17.1	17.1%_35r	chr5	178143707	RMND5B	EXON	29	0	0	6	35	27	0	0	0	27	6	35	0	27	chr5_178143707
chr5	178143956	178143956	13.6	13.6%_44r	chr5	178143956	RMND5B	EXON	38	0	0	6	44	39	0	0	0	39	6	44	0	39	chr5_178143956
chr5	178143998	178143998	8	8.0%_25r	chr5	178143998	RMND5B	EXON	23	0	0	2	25	26	0	0	0	26	2	25	0	26	chr5_178143998
chr5	178146120	178146120	7.4	7.4%_27r	chr5	178146120	RMND5B	EXON	25	0	0	2	27	31	0	0	0	31	2	27	0	31	chr5_178146120
chr5	178147622	178147622	8.3	8.3%_24r	chr5	178147622	RMND5B	EXON	22	0	0	2	24	30	0	0	0	30	2	24	0	30	chr5_178147622
chr5	178147865	178147865	6.9	6.9%_58r	chr5	178147865	RMND5B	EXON	54	0	0	4	58	71	0	1	0	72	4	58	0	72	chr5_178147865
chr5	178148328	178148328	26.7	26.7%_30r	chr5	178148328	RMND5B	EXON	22	0	0	8	30	38	0	0	0	38	8	30	0	38	chr5_178148328
chr5	178148378	178148378	23.3	23.3%_43r	chr5	178148378	RMND5B	EXON	33	0	0	10	43	29	0	0	0	29	10	43	0	29	chr5_178148378
chr5	149348422	149348422	26.5	26.5%_34r	chr5	149348422	GRPEL2	EXON	25	0	0	9	34	32	0	0	0	32	9	34	0	32	chr5_149348422
chr5	149348423	149348423	17.6	17.6%_34r	chr5	149348423	GRPEL2	EXON	28	0	0	6	34	32	0	0	0	32	6	34	0	32	chr5_149348423
chr5	149351014	149351014	6.2	6.2%_32r	chr5	149351014	GRPEL2	EXON	30	0	0	2	32	31	0	0	0	31	2	32	0	31	chr5_149351014
chr5	149351029	149351029	8	8.0%_25r	chr5	149351029	GRPEL2	EXON	23	0	0	2	25	27	0	0	0	27	2	25	0	27	chr5_149351029
chr5	149351054	149351054	38.1	38.1%_21r	chr5	149351054	GRPEL2	EXON	13	0	0	8	21	20	0	0	0	20	8	21	0	20	chr5_149351054
chr5	149351212	149351212	6.1	6.1%_33r	chr5	149351212	GRPEL2	EXON	31	0	0	2	33	34	0	0	0	34	2	33	0	34	chr5_149351212
chr5	149351504	149351504	7.1	7.1%_28r	chr5	149351504	GRPEL2	EXON	26	0	0	2	28	16	0	0	0	16	2	28	0	16	chr5_149351504
chr5	149351602	149351602	16.1	16.1%_31r	chr5	149351602	GRPEL2	EXON	26	0	0	5	31	31	0	0	0	31	5	31	0	31	chr5_149351602
chr5	149351695	149351695	10	10.0%_20r	chr5	149351695	GRPEL2	EXON	18	0	0	2	20	18	0	0	0	18	2	20	0	18	chr5_149351695
chr5	149352300	149352300	8.1	8.1%_37r	chr5	149352300	GRPEL2	EXON	34	0	0	3	37	26	0	0	0	26	3	37	0	26	chr5_149352300
chr5	149352815	149352815	7.7	7.7%_26r	chr5	149352815	GRPEL2	EXON	24	0	0	2	26	30	0	0	0	30	2	26	0	30	chr5_149352815
chr5	149353337	149353337	23.8	23.8%_21r	chr5	149353337	GRPEL2	EXON	16	0	0	5	21	21	0	0	0	21	5	21	0	21	chr5_149353337
chr5	149353499	149353499	8.3	8.3%_24r	chr5	149353499	GRPEL2	EXON	22	0	0	2	24	37	0	0	0	37	2	24	0	37	chr5_149353499
chr5	149354334	149354334	7.5	7.5%_80r	chr5	149354334	GRPEL2	EXON	74	0	0	6	80	89	0	0	0	89	6	80	0	89	chr5_149354334
chr5	43653029	43653029	7.4	7.4%_27r	chr5	43653029	NNT	EXON	25	0	0	2	27	33	0	0	0	33	2	27	0	33	chr5_43653029
chr5	43655907	43655907	11.1	11.1%_27r	chr5	43655907	NNT	EXON	24	0	0	3	27	22	0	0	0	22	3	27	0	22	chr5_43655907
chr5	43655971	43655971	6.2	6.2%_32r	chr5	43655971	NNT	EXON	30	0	0	2	32	24	0	0	0	24	2	32	0	24	chr5_43655971
chr5	43704341	43704341	17.4	17.4%_23r	chr5	43704341	NNT	EXON	19	0	0	4	23	15	0	0	0	15	4	23	0	15	chr5_43704341
chr5	43704503	43704503	20	20.0%_25r	chr5	43704503	NNT	EXON	20	0	0	5	25	23	0	0	0	23	5	25	0	23	chr5_43704503
chr5	107378358	107378358	6.4	6.4%_47r	chr5	107378358	EFNA5	EXON	0	44	3	0	47	0	76	0	0	76	3	47	0	76	chr5_107378358
chr5	107378503	107378503	8.1	8.1%_62r	chr5	107378503	EFNA5	EXON	0	57	5	0	62	0	76	0	0	76	5	62	0	76	chr5_107378503
chr5	107378551	107378551	9.3	9.3%_54r	chr5	107378551	EFNA5	EXON	0	49	5	0	54	0	43	0	0	43	5	54	0	43	chr5_107378551
chr5	107378635	107378635	18.2	18.2%_99r	chr5	107378635	EFNA5	EXON	0	81	18	0	99	0	122	0	0	122	18	99	0	122	chr5_107378635
chr5	107379077	107379077	6.2	6.2%_32r	chr5	107379077	EFNA5	EXON	0	30	2	0	32	0	53	0	0	53	2	32	0	53	chr5_107379077
chr5	107379297	107379297	9.8	9.8%_61r	chr5	107379297	EFNA5	EXON	0	55	6	0	61	0	68	0	0	68	6	61	0	68	chr5_107379297
chr5	107379380	107379380	6.4	6.4%_47r	chr5	107379380	EFNA5	EXON	1	43	3	0	47	0	53	0	0	53	3	47	0	53	chr5_107379380
chr5	107379396	107379396	9.3	9.3%_43r	chr5	107379396	EFNA5	EXON	0	39	4	0	43	0	43	0	0	43	4	43	0	43	chr5_107379396
chr5	107379528	107379528	8.6	8.6%_35r	chr5	107379528	EFNA5	EXON	1	31	3	0	35	0	33	0	0	33	3	35	0	33	chr5_107379528
chr5	107379980	107379980	20.8	20.8%_24r	chr5	107379980	EFNA5	EXON	0	19	5	0	24	0	29	0	0	29	5	24	0	29	chr5_107379980
chr5	107380166	107380166	12	12.0%_25r	chr5	107380166	EFNA5	EXON	0	22	3	0	25	0	30	0	0	30	3	25	0	30	chr5_107380166
chr5	107380250	107380250	9.1	9.1%_22r	chr5	107380250	EFNA5	EXON	0	20	2	0	22	0	30	0	0	30	2	22	0	30	chr5_107380250
chr5	107380323	107380323	9.5	9.5%_21r	chr5	107380323	EFNA5	EXON	0	19	2	0	21	0	29	0	0	29	2	21	0	29	chr5_107380323
chr5	127526731	127526731	6.9	6.9%_29r	chr5	127526731	PRRC1	EXON	27	0	0	2	29	41	0	0	0	41	2	29	0	41	chr5_127526731
chr5	127530307	127530307	6.1	6.1%_49r	chr5	127530307	PRRC1	EXON	46	0	0	3	49	33	0	0	0	33	3	49	0	33	chr5_127530307
chr5	127533726	127533726	21.3	21.3%_61r	chr5	127533726	PRRC1	EXON	48	0	0	13	61	54	0	0	0	54	13	61	0	54	chr5_127533726
chr5	127533756	127533756	7.5	7.5%_53r	chr5	127533756	PRRC1	EXON	49	0	0	4	53	55	0	0	0	55	4	53	0	55	chr5_127533756
chr5	127533770	127533770	16.7	16.7%_60r	chr5	127533770	PRRC1	EXON	50	0	0	10	60	50	0	0	0	50	10	60	0	50	chr5_127533770
chr5	127551718	127551718	13.6	13.6%_59r	chr5	127551718	PRRC1	EXON	51	0	0	8	59	56	0	0	0	56	8	59	0	56	chr5_127551718
chr5	127551748	127551748	8.3	8.3%_36r	chr5	127551748	PRRC1	EXON	33	0	0	3	36	32	0	0	0	32	3	36	0	32	chr5_127551748
chr5	127551782	127551782	6.9	6.9%_29r	chr5	127551782	PRRC1	EXON	27	0	0	2	29	16	0	0	0	16	2	29	0	16	chr5_127551782
chr5	127551783	127551783	6.7	6.7%_30r	chr5	127551783	PRRC1	EXON	28	0	0	2	30	16	0	0	0	16	2	30	0	16	chr5_127551783
chr5	127552090	127552090	7.1	7.1%_28r	chr5	127552090	PRRC1	EXON	26	0	0	2	28	22	0	0	0	22	2	28	0	22	chr5_127552090
chr5	127554150	127554150	27.3	27.3%_33r	chr5	127554150	PRRC1	EXON	24	0	0	9	33	25	0	0	0	25	9	33	0	25	chr5_127554150
chr5	127554526	127554526	6.7	6.7%_30r	chr5	127554526	PRRC1	EXON	28	0	0	2	30	24	0	0	0	24	2	30	0	24	chr5_127554526
chr5	127554628	127554628	7.9	7.9%_38r	chr5	127554628	PRRC1	EXON	35	0	0	3	38	39	0	0	0	39	3	38	0	39	chr5_127554628
chr5	79326856	79326856	19	19.0%_21r	chr5	79326856	JMY	EXON	17	0	0	4	21	33	0	0	0	33	4	21	0	33	chr5_79326856
chr5	180847924	180847924	12.9	12.9%_31r	chr5	180847924	ZFP62	EXON	0	27	4	0	31	0	21	0	0	21	4	31	0	21	chr5_180847924
chr5	180850869	180850869	6.9	6.9%_29r	chr5	180850869	ZFP62	EXON	0	27	2	0	29	0	24	0	0	24	2	29	0	24	chr5_180850869
chr5	180851194	180851194	7.4	7.4%_27r	chr5	180851194	ZFP62	EXON	0	25	2	0	27	0	12	0	0	12	2	27	0	12	chr5_180851194
chr5	168488675	168488675	8.6	8.6%_58r	chr5	168488675	RARS1	EXON	53	0	0	5	58	49	0	0	0	49	5	58	0	49	chr5_168488675
chr5	168492766	168492766	39.1	39.1%_87r	chr5	168492766	RARS1	EXON	53	0	0	34	87	88	0	0	0	88	34	87	0	88	chr5_168492766
chr5	168492767	168492767	9.4	9.4%_85r	chr5	168492767	RARS1	EXON	77	0	0	8	85	85	0	0	0	85	8	85	0	85	chr5_168492767
chr5	168493911	168493911	8.3	8.3%_108r	chr5	168493911	RARS1	EXON	99	0	0	9	108	121	0	0	0	121	9	108	0	121	chr5_168493911
chr5	168500601	168500601	12.3	12.3%_155r	chr5	168500601	RARS1	EXON	136	0	0	19	155	135	0	1	0	136	19	155	0	136	chr5_168500601
chr5	168500631	168500631	14.8	14.8%_142r	chr5	168500631	RARS1	EXON	121	0	0	21	142	143	0	0	0	143	21	142	0	143	chr5_168500631
chr5	168500684	168500684	11.7	11.7%_128r	chr5	168500684	RARS1	EXON	113	0	0	15	128	119	0	0	0	119	15	128	0	119	chr5_168500684
chr5	168506176	168506176	33.3	33.3%_123r	chr5	168506176	RARS1	EXON	82	0	0	41	123	146	0	0	0	146	41	123	0	146	chr5_168506176
chr5	168506735	168506735	9.9	9.9%_172r	chr5	168506735	RARS1	EXON	155	0	0	17	172	160	0	0	0	160	17	172	0	160	chr5_168506735
chr5	168506739	168506739	6.1	6.1%_165r	chr5	168506739	RARS1	EXON	155	0	0	10	165	148	0	0	0	148	10	165	0	148	chr5_168506739
chr5	168510661	168510661	13.2	13.2%_114r	chr5	168510661	RARS1	EXON	98	1	0	15	114	122	0	0	0	122	15	114	0	122	chr5_168510661
chr5	168516837	168516837	19.9	19.9%_166r	chr5	168516837	RARS1	EXON	133	0	0	33	166	162	0	0	0	162	33	166	0	162	chr5_168516837
chr5	168517859	168517859	6.2	6.2%_80r	chr5	168517859	RARS1	EXON	75	0	0	5	80	90	0	0	0	90	5	80	0	90	chr5_168517859
chr5	168517860	168517860	9.3	9.3%_75r	chr5	168517860	RARS1	EXON	68	0	0	7	75	81	0	0	0	81	7	75	0	81	chr5_168517860
chr5	168519190	168519190	6.1	6.1%_82r	chr5	168519190	RARS1	EXON	77	0	0	5	82	96	0	0	0	96	5	82	0	96	chr5_168519190
chr5	134727262	134727262	28	28.0%_25r	chr5	134727262	SEC24A	EXON	18	0	0	7	25	27	0	0	0	27	7	25	0	27	chr5_134727262
chr5	134727266	134727266	12.9	12.9%_31r	chr5	134727266	SEC24A	EXON	27	0	0	4	31	30	0	0	0	30	4	31	0	30	chr5_134727266
chr5	134727270	134727270	6.5	6.5%_31r	chr5	134727270	SEC24A	EXON	29	0	0	2	31	30	0	0	0	30	2	31	0	30	chr5_134727270
chr5	134727525	134727525	10.7	10.7%_28r	chr5	134727525	SEC24A	EXON	25	0	0	3	28	24	0	0	0	24	3	28	0	24	chr5_134727525
chr5	58454421	58454421	9.1	9.1%_22r	chr5	58454421	PLK2	EXON	0	20	2	0	22	0	11	0	0	11	2	22	0	11	chr5_58454421
chr5	58454594	58454594	8.3	8.3%_24r	chr5	58454594	PLK2	EXON	0	22	2	0	24	0	18	0	0	18	2	24	0	18	chr5_58454594
[truncated: 42,988 more rows]

## Sheet: 3-TDP-43-ADAR-final
chromosome	coordinate	coordinate	percentage editing	percentage editing/read covering	gene	location	ID
[truncated: 17,180 more rows]

## Sheet: 4-TDP-43-APOBEC replicate 1
Chr	Start coordinate	End coordinate	Editing percentage	Concatenation of editing percentage and reads	Chr name	Edit coordinate	Name	Type	A count	T count	C count	G count	Total nt count	A count from wtRNA	T count from WT RNA	C count from WT RNA	G count from WT RNA	Total count from WT RNA	Editbase count	Total nt count	Editbase count from WT RNA	Total nt count from WT Rna	Identifier
[truncated: 37,662 more rows]

[truncated: 3 more sheets: 5-TDP-43-APOBEC replicate 2, 6-TDP43-APOBEC-final, README]
