# Supplementary material for: Comparison of TRIBE and STAMP for identifying targets of RNA binding proteins in human and Drosophila cells
Source: RNA. 2023 Aug;29(8):1230–42. doi: 10.1261/rna.079608.123 (PMC10351885; doi:10.1261/rna.079608.123)
Supplement: Supplemental Material [file supp_079608.123_Supplemental_Data_2_.xlsx]

## Sheet: 1-Hrp48-ADAR replicate 1
Chr	Start coordinate	End coordinate	Editing percentage	Concatenation of editing percentage and reads	Chr name	Edit coordinate	Name	Type	A count	T count	C count	G count	Total nt count	A count from wtRNA	T count from WT RNA	C count from WT RNA	G count from WT RNA	Total count from WT RNA	Editbase count	Total nt count	Editbase count from WT RNA	Total nt count from WT Rna	Identifier
chr4	210318	210318	8	8.0%_25r	chr4	210318	Crk	EXON	23	0	0	2	25	63	0	0	0	63	2	25	0	63	chr4_210318
chr4	210327	210327	8	8.0%_25r	chr4	210327	Crk	EXON	23	0	0	2	25	68	0	0	0	68	2	25	0	68	chr4_210327
chr4	210355	210355	9.3	9.3%_43r	chr4	210355	Crk	EXON	39	0	0	4	43	222	0	0	0	222	4	43	0	222	chr4_210355
chr4	210417	210417	11.1	11.1%_36r	chr4	210417	Crk	EXON	32	0	0	4	36	143	0	0	0	143	4	36	0	143	chr4_210417
chr4	210427	210427	11.8	11.8%_34r	chr4	210427	Crk	EXON	30	0	0	4	34	110	0	0	0	110	4	34	0	110	chr4_210427
chr4	210449	210449	9.4	9.4%_32r	chr4	210449	Crk	EXON	29	0	0	3	32	183	0	0	0	183	3	32	0	183	chr4_210449
chr4	210453	210453	6.2	6.2%_32r	chr4	210453	Crk	EXON	30	0	0	2	32	187	0	0	0	187	2	32	0	187	chr4_210453
chr4	210455	210455	6.7	6.7%_30r	chr4	210455	Crk	EXON	28	0	0	2	30	188	1	0	0	189	2	30	0	189	chr4_210455
chr4	210574	210574	25.9	25.9%_27r	chr4	210574	Crk	EXON	20	0	0	7	27	175	0	0	0	175	7	27	0	175	chr4_210574
chr4	210580	210580	27.6	27.6%_29r	chr4	210580	Crk	EXON	21	0	0	8	29	240	0	0	0	240	8	29	0	240	chr4_210580
chr4	210582	210582	6.7	6.7%_30r	chr4	210582	Crk	EXON	28	0	0	2	30	226	0	3	0	229	2	30	0	229	chr4_210582
chr4	210584	210584	48	48.0%_25r	chr4	210584	Crk	EXON	13	0	0	12	25	200	0	0	0	200	12	25	0	200	chr4_210584
chr4	210592	210592	12.9	12.9%_31r	chr4	210592	Crk	EXON	27	0	0	4	31	247	0	0	0	247	4	31	0	247	chr4_210592
chr4	210608	210608	8.8	8.8%_34r	chr4	210608	Crk	EXON	31	0	0	3	34	181	0	0	0	181	3	34	0	181	chr4_210608
chr4	210611	210611	20.6	20.6%_34r	chr4	210611	Crk	EXON	27	0	0	7	34	178	1	4	0	183	7	34	0	183	chr4_210611
chr4	210612	210612	17.6	17.6%_34r	chr4	210612	Crk	EXON	28	0	0	6	34	181	0	0	0	181	6	34	0	181	chr4_210612
chr4	210633	210633	34.1	34.1%_41r	chr4	210633	Crk	EXON	27	0	0	14	41	222	0	0	0	222	14	41	0	222	chr4_210633
chr4	210647	210647	12.8	12.8%_47r	chr4	210647	Crk	EXON	41	0	0	6	47	269	0	1	0	270	6	47	0	270	chr4_210647
chr4	210654	210654	6.2	6.2%_48r	chr4	210654	Crk	EXON	45	0	0	3	48	278	0	0	0	278	3	48	0	278	chr4_210654
chr4	210657	210657	14.3	14.3%_42r	chr4	210657	Crk	EXON	36	0	0	6	42	271	0	0	0	271	6	42	0	271	chr4_210657
chr4	211593	211593	7.1	7.1%_28r	chr4	211593	Crk	EXON	26	0	0	2	28	202	0	0	0	202	2	28	0	202	chr4_211593
chr4	211621	211621	6.9	6.9%_29r	chr4	211621	Crk	EXON	27	0	0	2	29	166	1	0	0	167	2	29	0	167	chr4_211621
chr4	211626	211626	8.3	8.3%_24r	chr4	211626	Crk	EXON	22	0	0	2	24	144	0	0	0	144	2	24	0	144	chr4_211626
chr4	211652	211652	12.5	12.5%_24r	chr4	211652	Crk	EXON	21	0	0	3	24	149	0	0	0	149	3	24	0	149	chr4_211652
chr4	211657	211657	16	16.0%_25r	chr4	211657	Crk	EXON	21	0	0	4	25	186	1	0	0	187	4	25	0	187	chr4_211657
chr4	211667	211667	12.5	12.5%_24r	chr4	211667	Crk	EXON	21	0	0	3	24	164	0	0	0	164	3	24	0	164	chr4_211667
chr4	211679	211679	12.9	12.9%_31r	chr4	211679	Crk	EXON	27	0	0	4	31	176	1	0	0	177	4	31	0	177	chr4_211679
chr4	211689	211689	24.1	24.1%_29r	chr4	211689	Crk	EXON	22	0	0	7	29	192	1	0	0	193	7	29	0	193	chr4_211689
chr4	211695	211695	14.3	14.3%_35r	chr4	211695	Crk	EXON	30	0	0	5	35	216	0	0	0	216	5	35	0	216	chr4_211695
chr4	211715	211715	6.9	6.9%_58r	chr4	211715	Crk	EXON	54	0	0	4	58	317	0	0	0	317	4	58	0	317	chr4_211715
chr4	211734	211734	7.5	7.5%_40r	chr4	211734	Crk	EXON	37	0	0	3	40	285	0	0	0	285	3	40	0	285	chr4_211734
chr4	211753	211753	10.5	10.5%_38r	chr4	211753	Crk	EXON	34	0	0	4	38	257	0	0	0	257	4	38	0	257	chr4_211753
chr4	211763	211763	33.3	33.3%_24r	chr4	211763	Crk	EXON	16	0	0	8	24	189	0	0	0	189	8	24	0	189	chr4_211763
chr4	211764	211764	54.2	54.2%_24r	chr4	211764	Crk	EXON	11	0	0	13	24	185	0	0	0	185	13	24	0	185	chr4_211764
chr4	211774	211774	9.1	9.1%_22r	chr4	211774	Crk	EXON	20	0	0	2	22	152	0	0	0	152	2	22	0	152	chr4_211774
chr4	211775	211775	52.4	52.4%_21r	chr4	211775	Crk	EXON	10	0	0	11	21	151	0	0	0	151	11	21	0	151	chr4_211775
chr4	211859	211859	6.7	6.7%_30r	chr4	211859	Crk	EXON	28	0	0	2	30	170	0	0	0	170	2	30	0	170	chr4_211859
chr4	211876	211876	17.4	17.4%_23r	chr4	211876	Crk	EXON	19	0	0	4	23	149	0	0	0	149	4	23	0	149	chr4_211876
chr4	211892	211892	7.7	7.7%_26r	chr4	211892	Crk	EXON	24	0	0	2	26	195	0	0	0	195	2	26	0	195	chr4_211892
chr4	211906	211906	19	19.0%_21r	chr4	211906	Crk	EXON	17	0	0	4	21	199	0	1	0	200	4	21	0	200	chr4_211906
chr4	211907	211907	42.9	42.9%_21r	chr4	211907	Crk	EXON	12	0	0	9	21	195	0	0	0	195	9	21	0	195	chr4_211907
chr4	211919	211919	6.2	6.2%_48r	chr4	211919	Crk	EXON	45	0	0	3	48	265	0	0	0	265	3	48	0	265	chr4_211919
chr4	211957	211957	10	10.0%_30r	chr4	211957	Crk	EXON	27	0	0	3	30	342	0	0	0	342	3	30	0	342	chr4_211957
chr4	211958	211958	6.7	6.7%_30r	chr4	211958	Crk	EXON	28	0	0	2	30	355	0	0	0	355	2	30	0	355	chr4_211958
chr4	211959	211959	6.5	6.5%_31r	chr4	211959	Crk	EXON	28	1	0	2	31	356	0	0	0	356	2	31	0	356	chr4_211959
chr4	211961	211961	9.7	9.7%_31r	chr4	211961	Crk	EXON	28	0	0	3	31	368	0	0	0	368	3	31	0	368	chr4_211961
chr4	211976	211976	10.2	10.2%_59r	chr4	211976	Crk	EXON	53	0	0	6	59	495	0	0	0	495	6	59	0	495	chr4_211976
chr4	211981	211981	16.1	16.1%_31r	chr4	211981	Crk	EXON	26	0	0	5	31	372	0	0	0	372	5	31	0	372	chr4_211981
chr4	212655	212655	18.9	18.9%_37r	chr4	212655	Crk	EXON	30	0	0	7	37	312	0	0	0	312	7	37	0	312	chr4_212655
chr4	212664	212664	20	20.0%_30r	chr4	212664	Crk	EXON	24	0	0	6	30	260	0	2	0	262	6	30	0	262	chr4_212664
chr4	212665	212665	6.5	6.5%_31r	chr4	212665	Crk	EXON	29	0	0	2	31	261	0	0	0	261	2	31	0	261	chr4_212665
chr4	212669	212669	21.2	21.2%_33r	chr4	212669	Crk	EXON	26	0	0	7	33	223	0	1	0	224	7	33	0	224	chr4_212669
chr4	212676	212676	6.1	6.1%_33r	chr4	212676	Crk	EXON	30	0	1	2	33	215	0	0	0	215	2	33	0	215	chr4_212676
chr4	212688	212688	6.2	6.2%_32r	chr4	212688	Crk	EXON	30	0	0	2	32	229	0	0	0	229	2	32	0	229	chr4_212688
chr4	212818	212818	17.2	17.2%_29r	chr4	212818	Crk	EXON	24	0	0	5	29	267	0	0	0	267	5	29	0	267	chr4_212818
chr4	212820	212820	7.4	7.4%_27r	chr4	212820	Crk	EXON	25	0	0	2	27	254	1	0	1	256	2	27	1	256	chr4_212820
chr4	212822	212822	8.7	8.7%_23r	chr4	212822	Crk	EXON	21	0	0	2	23	236	0	0	0	236	2	23	0	236	chr4_212822
chr4	212826	212826	40	40.0%_30r	chr4	212826	Crk	EXON	18	0	0	12	30	263	0	0	0	263	12	30	0	263	chr4_212826
chr4	212827	212827	23.3	23.3%_30r	chr4	212827	Crk	EXON	23	0	0	7	30	253	0	1	0	254	7	30	0	254	chr4_212827
chr4	212841	212841	10.2	10.2%_49r	chr4	212841	Crk	EXON	44	0	0	5	49	326	0	0	1	327	5	49	1	327	chr4_212841
chr4	212906	212906	36.4	36.4%_33r	chr4	212906	Crk	EXON	21	0	0	12	33	195	0	0	0	195	12	33	0	195	chr4_212906
chr4	212922	212922	16	16.0%_25r	chr4	212922	Crk	EXON	21	0	0	4	25	164	0	0	0	164	4	25	0	164	chr4_212922
chr4	212935	212935	7.4	7.4%_27r	chr4	212935	Crk	EXON	25	0	0	2	27	116	0	0	0	116	2	27	0	116	chr4_212935
chr4	212936	212936	7.4	7.4%_27r	chr4	212936	Crk	EXON	25	0	0	2	27	119	0	0	0	119	2	27	0	119	chr4_212936
chr4	212956	212956	12.5	12.5%_32r	chr4	212956	Crk	EXON	28	0	0	4	32	125	1	0	0	126	4	32	0	126	chr4_212956
chr4	212988	212988	10.3	10.3%_29r	chr4	212988	Crk	EXON	26	0	0	3	29	189	0	0	0	189	3	29	0	189	chr4_212988
chr4	212989	212989	10.3	10.3%_29r	chr4	212989	Crk	EXON	26	0	0	3	29	189	0	0	0	189	3	29	0	189	chr4_212989
chr4	212993	212993	8.3	8.3%_24r	chr4	212993	Crk	EXON	22	0	0	2	24	204	0	0	0	204	2	24	0	204	chr4_212993
chr4	212995	212995	12	12.0%_25r	chr4	212995	Crk	EXON	22	0	0	3	25	209	0	0	0	209	3	25	0	209	chr4_212995
chr4	213001	213001	7.4	7.4%_27r	chr4	213001	Crk	EXON	25	0	0	2	27	231	0	2	1	234	2	27	1	234	chr4_213001
chr4	213031	213031	19	19.0%_21r	chr4	213031	Crk	EXON	17	0	0	4	21	113	0	0	0	113	4	21	0	113	chr4_213031
chr4	213035	213035	16	16.0%_25r	chr4	213035	Crk	EXON	21	0	0	4	25	116	0	0	0	116	4	25	0	116	chr4_213035
chr4	213047	213047	7.7	7.7%_26r	chr4	213047	Crk	EXON	24	0	0	2	26	149	0	0	0	149	2	26	0	149	chr4_213047
chr4	213065	213065	12	12.0%_25r	chr4	213065	Crk	EXON	22	0	0	3	25	260	0	0	0	260	3	25	0	260	chr4_213065
chr4	213071	213071	6.7	6.7%_30r	chr4	213071	Crk	EXON	28	0	0	2	30	290	0	0	0	290	2	30	0	290	chr4_213071
chr4	213077	213077	11.4	11.4%_35r	chr4	213077	Crk	EXON	31	0	0	4	35	270	0	0	0	270	4	35	0	270	chr4_213077
chr4	65370	65370	8.7	8.7%_23r	chr4	65370	RpS3A	EXON	0	21	2	0	23	0	31	0	0	31	2	23	0	31	chr4_65370
chr4	65403	65403	27.6	27.6%_29r	chr4	65403	RpS3A	EXON	0	21	8	0	29	0	47	0	0	47	8	29	0	47	chr4_65403
chr4	65406	65406	6.2	6.2%_48r	chr4	65406	RpS3A	EXON	0	45	3	0	48	0	90	0	0	90	3	48	0	90	chr4_65406
chr4	65410	65410	15.8	15.8%_57r	chr4	65410	RpS3A	EXON	0	48	9	0	57	0	106	0	0	106	9	57	0	106	chr4_65410
chr4	65444	65444	28.8	28.8%_59r	chr4	65444	RpS3A	EXON	0	42	17	0	59	1	146	0	0	147	17	59	0	147	chr4_65444
chr4	65470	65470	7.1	7.1%_42r	chr4	65470	RpS3A	EXON	0	39	3	0	42	0	98	0	0	98	3	42	0	98	chr4_65470
chr4	65487	65487	10.9	10.9%_55r	chr4	65487	RpS3A	EXON	0	49	6	0	55	0	163	0	0	163	6	55	0	163	chr4_65487
chr4	65492	65492	21.4	21.4%_56r	chr4	65492	RpS3A	EXON	0	44	12	0	56	0	163	0	0	163	12	56	0	163	chr4_65492
chr4	65498	65498	6.4	6.4%_47r	chr4	65498	RpS3A	EXON	0	44	3	0	47	0	169	0	0	169	3	47	0	169	chr4_65498
chr4	65499	65499	11.6	11.6%_43r	chr4	65499	RpS3A	EXON	0	38	5	0	43	0	163	0	0	163	5	43	0	163	chr4_65499
chr4	65503	65503	6.8	6.8%_44r	chr4	65503	RpS3A	EXON	0	41	3	0	44	0	135	0	0	135	3	44	0	135	chr4_65503
chr4	66001	66001	8.5	8.5%_47r	chr4	66001	RpS3A	EXON	0	43	4	0	47	0	112	0	1	113	4	47	0	113	chr4_66001
chr4	66008	66008	14.6	14.6%_41r	chr4	66008	RpS3A	EXON	0	35	6	0	41	0	105	0	0	105	6	41	0	105	chr4_66008
chr4	66021	66021	35.5	35.5%_62r	chr4	66021	RpS3A	EXON	0	39	22	1	62	0	141	0	0	141	22	62	0	141	chr4_66021
chr4	66029	66029	18	18.0%_61r	chr4	66029	RpS3A	EXON	0	50	11	0	61	0	118	0	0	118	11	61	0	118	chr4_66029
chr4	66046	66046	27.5	27.5%_51r	chr4	66046	RpS3A	EXON	0	37	14	0	51	1	93	0	0	94	14	51	0	94	chr4_66046
chr4	66124	66124	14.3	14.3%_63r	chr4	66124	RpS3A	EXON	0	54	9	0	63	0	84	0	0	84	9	63	0	84	chr4_66124
chr4	66135	66135	6.5	6.5%_62r	chr4	66135	RpS3A	EXON	0	58	4	0	62	0	102	0	0	102	4	62	0	102	chr4_66135
chr4	66141	66141	6.9	6.9%_58r	chr4	66141	RpS3A	EXON	0	54	4	0	58	0	96	0	0	96	4	58	0	96	chr4_66141
chr4	66175	66175	45.1	45.1%_51r	chr4	66175	RpS3A	EXON	0	28	23	0	51	0	158	0	0	158	23	51	0	158	chr4_66175
chr4	66180	66180	13	13.0%_54r	chr4	66180	RpS3A	EXON	0	47	7	0	54	0	167	0	0	167	7	54	0	167	chr4_66180
chr4	66196	66196	7.3	7.3%_41r	chr4	66196	RpS3A	EXON	0	38	3	0	41	0	143	0	0	143	3	41	0	143	chr4_66196
chr4	66246	66246	74.6	74.6%_836r	chr4	66246	RpS3A	EXON	1	211	624	0	836	1	1912	2	0	1915	624	836	2	1915	chr4_66246
chr4	66391	66391	10.5	10.5%_1911r	chr4	66391	RpS3A	EXON	0	1710	200	1	1911	3	2314	0	0	2317	200	1911	0	2317	chr4_66391
chr4	66450	66450	10.1	10.1%_2901r	chr4	66450	RpS3A	EXON	0	2607	292	2	2901	2	4221	0	1	4224	292	2901	0	4224	chr4_66450
chr4	66644	66644	17.9	17.9%_2615r	chr4	66644	RpS3A	EXON	5	2142	468	0	2615	0	3498	9	0	3507	468	2615	9	3507	chr4_66644
chr4	66694	66694	12.1	12.1%_2332r	chr4	66694	RpS3A	EXON	1	2049	282	0	2332	2	3581	0	2	3585	282	2332	0	3585	chr4_66694
chr4	66896	66896	7.4	7.4%_2557r	chr4	66896	RpS3A	EXON	3	2365	189	0	2557	0	3394	0	1	3395	189	2557	0	3395	chr4_66896
chr4	66924	66924	11.1	11.1%_2011r	chr4	66924	RpS3A	EXON	0	1785	224	2	2011	2	2746	3	1	2752	224	2011	3	2752	chr4_66924
chr4	66954	66954	13.4	13.4%_1967r	chr4	66954	RpS3A	EXON	1	1702	263	1	1967	0	2902	5	0	2907	263	1967	5	2907	chr4_66954
chr4	66956	66956	7.7	7.7%_1858r	chr4	66956	RpS3A	EXON	3	1712	143	0	1858	1	2935	6	0	2942	143	1858	6	2942	chr4_66956
chr4	66957	66957	20.8	20.8%_1730r	chr4	66957	RpS3A	EXON	3	1368	359	0	1730	3	2784	2	0	2789	359	1730	2	2789	chr4_66957
chr4	66968	66968	29.4	29.4%_1732r	chr4	66968	RpS3A	EXON	13	1210	509	0	1732	6	2711	5	0	2722	509	1732	5	2722	chr4_66968
chr4	67051	67051	25.2	25.2%_1492r	chr4	67051	RpS3A	EXON	2	1113	376	1	1492	2	2316	0	0	2318	376	1492	0	2318	chr4_67051
chr4	67089	67089	12.7	12.7%_1933r	chr4	67089	RpS3A	EXON	3	1685	245	0	1933	1	2373	4	0	2378	245	1933	4	2378	chr4_67089
chr4	67122	67122	19.1	19.1%_1519r	chr4	67122	RpS3A	EXON	3	1223	290	3	1519	1	2473	6	0	2480	290	1519	6	2480	chr4_67122
chr4	67175	67175	6.9	6.9%_622r	chr4	67175	RpS3A	EXON	0	578	43	1	622	0	1301	1	0	1302	43	622	1	1302	chr4_67175
chr4	360621	360621	14.3	14.3%_21r	chr4	360621	Hcf	EXON	18	0	0	3	21	59	0	0	0	59	3	21	0	59	chr4_360621
chr4	360717	360717	18.2	18.2%_22r	chr4	360717	Hcf	EXON	18	0	0	4	22	99	0	0	0	99	4	22	0	99	chr4_360717
chr4	360729	360729	15.4	15.4%_26r	chr4	360729	Hcf	EXON	22	0	0	4	26	94	0	0	0	94	4	26	0	94	chr4_360729
chr4	360732	360732	9.1	9.1%_22r	chr4	360732	Hcf	EXON	20	0	0	2	22	93	0	0	0	93	2	22	0	93	chr4_360732
chr4	360739	360739	33.3	33.3%_21r	chr4	360739	Hcf	EXON	14	0	0	7	21	74	0	0	0	74	7	21	0	74	chr4_360739
chr4	360776	360776	6.5	6.5%_31r	chr4	360776	Hcf	EXON	29	0	0	2	31	78	0	0	0	78	2	31	0	78	chr4_360776
chr4	360799	360799	10	10.0%_20r	chr4	360799	Hcf	EXON	18	0	0	2	20	87	0	0	0	87	2	20	0	87	chr4_360799
chr4	360811	360811	34.5	34.5%_29r	chr4	360811	Hcf	EXON	19	0	0	10	29	87	0	0	0	87	10	29	0	87	chr4_360811
chr4	360836	360836	19.2	19.2%_26r	chr4	360836	Hcf	EXON	21	0	0	5	26	107	0	0	0	107	5	26	0	107	chr4_360836
chr4	360839	360839	7.4	7.4%_27r	chr4	360839	Hcf	EXON	25	0	0	2	27	104	0	0	0	104	2	27	0	104	chr4_360839
chr4	360847	360847	26.9	26.9%_26r	chr4	360847	Hcf	EXON	18	0	1	7	26	98	0	0	0	98	7	26	0	98	chr4_360847
chr4	360851	360851	10.7	10.7%_28r	chr4	360851	Hcf	EXON	25	0	0	3	28	94	0	1	0	95	3	28	0	95	chr4_360851
chr4	360876	360876	18.2	18.2%_33r	chr4	360876	Hcf	EXON	27	0	0	6	33	63	0	0	0	63	6	33	0	63	chr4_360876
chr4	360889	360889	7.7	7.7%_39r	chr4	360889	Hcf	EXON	36	0	0	3	39	70	0	0	0	70	3	39	0	70	chr4_360889
chr4	360932	360932	16.2	16.2%_37r	chr4	360932	Hcf	EXON	31	0	0	6	37	75	0	0	0	75	6	37	0	75	chr4_360932
chr4	360934	360934	21.1	21.1%_38r	chr4	360934	Hcf	EXON	30	0	0	8	38	76	0	0	0	76	8	38	0	76	chr4_360934
chr4	360986	360986	7.4	7.4%_27r	chr4	360986	Hcf	EXON	25	0	0	2	27	129	0	1	0	130	2	27	0	130	chr4_360986
chr4	360998	360998	10.2	10.2%_49r	chr4	360998	Hcf	EXON	44	0	0	5	49	209	0	0	0	209	5	49	0	209	chr4_360998
chr4	362310	362310	14.3	14.3%_21r	chr4	362310	Hcf	EXON	18	0	0	3	21	124	0	0	0	124	3	21	0	124	chr4_362310
chr4	362319	362319	40	40.0%_20r	chr4	362319	Hcf	EXON	12	0	0	8	20	109	0	0	0	109	8	20	0	109	chr4_362319
chr4	362344	362344	17.9	17.9%_28r	chr4	362344	Hcf	EXON	23	0	0	5	28	87	0	0	0	87	5	28	0	87	chr4_362344
chr4	362364	362364	22.7	22.7%_22r	chr4	362364	Hcf	EXON	17	0	0	5	22	63	0	0	0	63	5	22	0	63	chr4_362364
chr4	362579	362579	20	20.0%_20r	chr4	362579	Hcf	EXON	16	0	0	4	20	29	0	0	0	29	4	20	0	29	chr4_362579
chr4	362692	362692	10.7	10.7%_28r	chr4	362692	Hcf	EXON	25	0	0	3	28	88	0	0	0	88	3	28	0	88	chr4_362692
chr4	363029	363029	9.1	9.1%_22r	chr4	363029	Hcf	EXON	20	0	0	2	22	107	0	0	0	107	2	22	0	107	chr4_363029
chr4	363036	363036	8.7	8.7%_23r	chr4	363036	Hcf	EXON	21	0	0	2	23	86	0	0	0	86	2	23	0	86	chr4_363036
chr4	363061	363061	8.3	8.3%_24r	chr4	363061	Hcf	EXON	22	0	0	2	24	65	0	0	0	65	2	24	0	65	chr4_363061
chr4	363111	363111	7.4	7.4%_27r	chr4	363111	Hcf	EXON	25	0	0	2	27	56	0	0	0	56	2	27	0	56	chr4_363111
chr4	363113	363113	11.1	11.1%_27r	chr4	363113	Hcf	EXON	24	0	0	3	27	59	0	0	0	59	3	27	0	59	chr4_363113
chr4	363495	363495	20.8	20.8%_24r	chr4	363495	Hcf	EXON	19	0	0	5	24	69	0	0	0	69	5	24	0	69	chr4_363495
chr4	363502	363502	29.6	29.6%_27r	chr4	363502	Hcf	EXON	19	0	0	8	27	73	0	0	0	73	8	27	0	73	chr4_363502
chr4	363524	363524	20	20.0%_25r	chr4	363524	Hcf	EXON	20	0	0	5	25	92	0	2	0	94	5	25	0	94	chr4_363524
chr4	363526	363526	12	12.0%_25r	chr4	363526	Hcf	EXON	22	0	0	3	25	90	0	0	0	90	3	25	0	90	chr4_363526
chr4	363531	363531	62.1	62.1%_29r	chr4	363531	Hcf	EXON	10	1	0	18	29	100	0	0	0	100	18	29	0	100	chr4_363531
chr4	363581	363581	12	12.0%_25r	chr4	363581	Hcf	EXON	22	0	0	3	25	51	0	0	0	51	3	25	0	51	chr4_363581
chr4	363582	363582	29.2	29.2%_24r	chr4	363582	Hcf	EXON	16	1	0	7	24	51	0	0	0	51	7	24	0	51	chr4_363582
chr4	363583	363583	47.8	47.8%_23r	chr4	363583	Hcf	EXON	12	0	0	11	23	51	0	0	0	51	11	23	0	51	chr4_363583
chr4	363624	363624	11.5	11.5%_26r	chr4	363624	Hcf	EXON	23	0	0	3	26	62	0	0	0	62	3	26	0	62	chr4_363624
chr4	363894	363894	10	10.0%_20r	chr4	363894	Hcf	EXON	18	0	0	2	20	102	0	0	0	102	2	20	0	102	chr4_363894
chr4	364050	364050	38.1	38.1%_21r	chr4	364050	Hcf	EXON	13	0	0	8	21	59	0	0	0	59	8	21	0	59	chr4_364050
chr4	364071	364071	7.1	7.1%_28r	chr4	364071	Hcf	EXON	26	0	0	2	28	71	0	0	0	71	2	28	0	71	chr4_364071
chr4	364116	364116	16.7	16.7%_24r	chr4	364116	Hcf	EXON	20	0	0	4	24	51	0	0	0	51	4	24	0	51	chr4_364116
chr4	364117	364117	75	75.0%_24r	chr4	364117	Hcf	EXON	6	0	0	18	24	52	0	0	0	52	18	24	0	52	chr4_364117
chr4	364162	364162	13	13.0%_23r	chr4	364162	Hcf	EXON	20	0	0	3	23	75	0	0	0	75	3	23	0	75	chr4_364162
chr4	364176	364176	9.5	9.5%_21r	chr4	364176	Hcf	EXON	19	0	0	2	21	72	0	0	0	72	2	21	0	72	chr4_364176
chr4	364193	364193	12.5	12.5%_24r	chr4	364193	Hcf	EXON	21	0	0	3	24	79	0	0	0	79	3	24	0	79	chr4_364193
chr4	364219	364219	27.3	27.3%_22r	chr4	364219	Hcf	EXON	16	0	0	6	22	58	0	0	0	58	6	22	0	58	chr4_364219
chr4	364220	364220	8.7	8.7%_23r	chr4	364220	Hcf	EXON	21	0	0	2	23	61	1	0	0	62	2	23	0	62	chr4_364220
chr4	364250	364250	7.4	7.4%_27r	chr4	364250	Hcf	EXON	25	0	0	2	27	55	0	0	0	55	2	27	0	55	chr4_364250
chr4	364291	364291	37	37.0%_27r	chr4	364291	Hcf	EXON	17	0	0	10	27	79	0	0	0	79	10	27	0	79	chr4_364291
chr4	364292	364292	20	20.0%_25r	chr4	364292	Hcf	EXON	20	0	0	5	25	77	1	0	0	78	5	25	0	78	chr4_364292
chr4	364293	364293	37.5	37.5%_24r	chr4	364293	Hcf	EXON	15	0	0	9	24	77	0	0	0	77	9	24	0	77	chr4_364293
chr4	364336	364336	62.1	62.1%_29r	chr4	364336	Hcf	EXON	11	0	0	18	29	88	0	0	0	88	18	29	0	88	chr4_364336
chr4	364350	364350	10	10.0%_30r	chr4	364350	Hcf	EXON	26	0	1	3	30	83	2	0	0	85	3	30	0	85	chr4_364350
chr4	364361	364361	15.6	15.6%_32r	chr4	364361	Hcf	EXON	27	0	0	5	32	75	0	0	0	75	5	32	0	75	chr4_364361
chr4	364363	364363	19.4	19.4%_31r	chr4	364363	Hcf	EXON	25	0	0	6	31	72	0	0	0	72	6	31	0	72	chr4_364363
chr4	364378	364378	6.2	6.2%_32r	chr4	364378	Hcf	EXON	30	0	0	2	32	59	0	0	0	59	2	32	0	59	chr4_364378
chr4	364389	364389	11.5	11.5%_26r	chr4	364389	Hcf	EXON	23	0	0	3	26	76	0	0	0	76	3	26	0	76	chr4_364389
chr4	364393	364393	14.3	14.3%_28r	chr4	364393	Hcf	EXON	24	0	0	4	28	82	0	0	0	82	4	28	0	82	chr4_364393
chr4	364399	364399	11.5	11.5%_26r	chr4	364399	Hcf	EXON	23	0	0	3	26	76	0	0	0	76	3	26	0	76	chr4_364399
chr4	365944	365944	50	50.0%_20r	chr4	365944	Hcf	EXON	10	0	0	10	20	69	0	0	0	69	10	20	0	69	chr4_365944
chr4	366123	366123	9.5	9.5%_21r	chr4	366123	Hcf	EXON	19	0	0	2	21	83	0	0	0	83	2	21	0	83	chr4_366123
chr4	366136	366136	9.1	9.1%_22r	chr4	366136	Hcf	EXON	20	0	0	2	22	61	0	0	0	61	2	22	0	61	chr4_366136
chr4	366168	366168	12.5	12.5%_32r	chr4	366168	Hcf	EXON	28	0	0	4	32	150	0	0	0	150	4	32	0	150	chr4_366168
chr4	366448	366448	15.4	15.4%_26r	chr4	366448	Hcf	EXON	22	0	0	4	26	168	0	0	0	168	4	26	0	168	chr4_366448
chr4	366451	366451	11.1	11.1%_27r	chr4	366451	Hcf	EXON	24	0	0	3	27	174	0	0	0	174	3	27	0	174	chr4_366451
chr4	366453	366453	11.5	11.5%_26r	chr4	366453	Hcf	EXON	23	0	0	3	26	168	0	0	0	168	3	26	0	168	chr4_366453
chr4	366618	366618	6.5	6.5%_31r	chr4	366618	Hcf	EXON	29	0	0	2	31	131	0	0	0	131	2	31	0	131	chr4_366618
chr4	366694	366694	20	20.0%_20r	chr4	366694	Hcf	EXON	16	0	0	4	20	81	0	0	0	81	4	20	0	81	chr4_366694
chr4	366699	366699	18.2	18.2%_22r	chr4	366699	Hcf	EXON	18	0	0	4	22	82	0	0	0	82	4	22	0	82	chr4_366699
chr4	369605	369605	25	25.0%_20r	chr4	369605	Hcf	EXON	15	0	0	5	20	62	0	0	0	62	5	20	0	62	chr4_369605
chr4	371238	371238	36.4	36.4%_22r	chr4	371238	Hcf	EXON	14	0	0	8	22	80	0	0	0	80	8	22	0	80	chr4_371238
chr4	371864	371864	8.3	8.3%_24r	chr4	371864	Hcf	EXON	22	0	0	2	24	45	0	0	0	45	2	24	0	45	chr4_371864
chr4	371885	371885	9.1	9.1%_22r	chr4	371885	Hcf	EXON	20	0	0	2	22	68	0	0	0	68	2	22	0	68	chr4_371885
chr4	371886	371886	19	19.0%_21r	chr4	371886	Hcf	EXON	16	1	0	4	21	65	0	2	0	67	4	21	0	67	chr4_371886
chr4	371902	371902	7.4	7.4%_27r	chr4	371902	Hcf	EXON	25	0	0	2	27	79	0	0	0	79	2	27	0	79	chr4_371902
chr4	371982	371982	14	14.0%_50r	chr4	371982	Hcf	EXON	43	0	0	7	50	137	0	0	0	137	7	50	0	137	chr4_371982
chr4	372010	372010	16.7	16.7%_60r	chr4	372010	Hcf	EXON	49	0	1	10	60	96	0	0	0	96	10	60	0	96	chr4_372010
chr4	372074	372074	9.9	9.9%_91r	chr4	372074	Hcf	EXON	82	0	0	9	91	170	0	0	0	170	9	91	0	170	chr4_372074
chr4	372106	372106	30.3	30.3%_66r	chr4	372106	Hcf	EXON	46	0	0	20	66	101	0	0	0	101	20	66	0	101	chr4_372106
chr4	372138	372138	6.7	6.7%_60r	chr4	372138	Hcf	EXON	56	0	0	4	60	75	1	0	0	76	4	60	0	76	chr4_372138
chr4	372250	372250	7.5	7.5%_40r	chr4	372250	Hcf	EXON	37	0	0	3	40	76	0	0	0	76	3	40	0	76	chr4_372250
chr4	372266	372266	6.2	6.2%_48r	chr4	372266	Hcf	EXON	45	0	0	3	48	72	0	0	0	72	3	48	0	72	chr4_372266
chr4	372268	372268	17.8	17.8%_45r	chr4	372268	Hcf	EXON	37	0	0	8	45	72	0	0	0	72	8	45	0	72	chr4_372268
chr4	372279	372279	14.8	14.8%_54r	chr4	372279	Hcf	EXON	46	0	0	8	54	93	0	0	0	93	8	54	0	93	chr4_372279
chr4	372327	372327	8.7	8.7%_46r	chr4	372327	Hcf	EXON	42	0	0	4	46	114	0	0	0	114	4	46	0	114	chr4_372327
chr4	372342	372342	17.8	17.8%_45r	chr4	372342	Hcf	EXON	36	0	1	8	45	132	0	0	0	132	8	45	0	132	chr4_372342
chr4	372396	372396	42.5	42.5%_73r	chr4	372396	Hcf	EXON	42	0	0	31	73	207	0	0	0	207	31	73	0	207	chr4_372396
chr4	372403	372403	21.2	21.2%_66r	chr4	372403	Hcf	EXON	52	0	0	14	66	240	0	1	0	241	14	66	0	241	chr4_372403
chr4	372406	372406	13.2	13.2%_68r	chr4	372406	Hcf	EXON	59	0	0	9	68	263	0	0	0	263	9	68	0	263	chr4_372406
chr4	372452	372452	13.8	13.8%_65r	chr4	372452	Hcf	EXON	56	0	0	9	65	131	0	0	0	131	9	65	0	131	chr4_372452
chr4	372464	372464	49.1	49.1%_55r	chr4	372464	Hcf	EXON	28	0	0	27	55	121	0	0	0	121	27	55	0	121	chr4_372464
chr4	372479	372479	46.3	46.3%_41r	chr4	372479	Hcf	EXON	22	0	0	19	41	72	0	0	0	72	19	41	0	72	chr4_372479
chr4	372491	372491	29.3	29.3%_41r	chr4	372491	Hcf	EXON	29	0	0	12	41	75	0	0	0	75	12	41	0	75	chr4_372491
chr4	372518	372518	9.8	9.8%_41r	chr4	372518	Hcf	EXON	37	0	0	4	41	56	0	0	0	56	4	41	0	56	chr4_372518
chr4	372521	372521	14.6	14.6%_41r	chr4	372521	Hcf	EXON	35	0	0	6	41	58	0	0	0	58	6	41	0	58	chr4_372521
chr4	372534	372534	18.9	18.9%_53r	chr4	372534	Hcf	EXON	43	0	0	10	53	85	0	0	0	85	10	53	0	85	chr4_372534
chr4	372537	372537	7.3	7.3%_55r	chr4	372537	Hcf	EXON	51	0	0	4	55	80	1	0	0	81	4	55	0	81	chr4_372537
chr4	372578	372578	18.8	18.8%_69r	chr4	372578	Hcf	EXON	56	0	0	13	69	111	0	0	0	111	13	69	0	111	chr4_372578
chr4	372590	372590	7	7.0%_71r	chr4	372590	Hcf	EXON	66	0	0	5	71	85	0	0	0	85	5	71	0	85	chr4_372590
chr4	372595	372595	7.1	7.1%_56r	chr4	372595	Hcf	EXON	52	0	0	4	56	70	0	0	0	70	4	56	0	70	chr4_372595
chr4	372600	372600	8.2	8.2%_49r	chr4	372600	Hcf	EXON	45	0	0	4	49	60	0	0	0	60	4	49	0	60	chr4_372600
chr4	372622	372622	11.3	11.3%_53r	chr4	372622	Hcf	EXON	46	0	1	6	53	65	0	0	0	65	6	53	0	65	chr4_372622
chr4	372651	372651	6	6.0%_50r	chr4	372651	Hcf	EXON	47	0	0	3	50	118	0	0	0	118	3	50	0	118	chr4_372651
chr4	372655	372655	17.8	17.8%_45r	chr4	372655	Hcf	EXON	37	0	0	8	45	111	0	0	0	111	8	45	0	111	chr4_372655
chr4	372656	372656	16	16.0%_50r	chr4	372656	Hcf	EXON	42	0	0	8	50	110	0	0	0	110	8	50	0	110	chr4_372656
chr4	372706	372706	12.1	12.1%_33r	chr4	372706	Hcf	EXON	29	0	0	4	33	128	0	0	0	128	4	33	0	128	chr4_372706
chr4	42945	42945	6.7	6.7%_30r	chr4	42945	CR45124	EXON	28	0	0	2	30	143	0	0	0	143	2	30	0	143	chr4_42945
chr4	43249	43249	13	13.0%_23r	chr4	43249	CR45124	EXON	20	0	0	3	23	67	0	0	0	67	3	23	0	67	chr4_43249
chr4	43255	43255	8.3	8.3%_24r	chr4	43255	CR45124	EXON	22	0	0	2	24	61	0	0	0	61	2	24	0	61	chr4_43255
chr4	43259	43259	10	10.0%_20r	chr4	43259	CR45124	EXON	18	0	0	2	20	61	0	0	0	61	2	20	0	61	chr4_43259
chr4	43282	43282	38.1	38.1%_21r	chr4	43282	CR45124	EXON	13	0	0	8	21	50	0	0	0	50	8	21	0	50	chr4_43282
chr4	43301	43301	9.1	9.1%_22r	chr4	43301	CR45124	EXON	19	1	0	2	22	52	1	1	0	54	2	22	0	54	chr4_43301
chr4	43315	43315	9.5	9.5%_21r	chr4	43315	CR45124	EXON	19	0	0	2	21	60	0	0	0	60	2	21	0	60	chr4_43315
chr4	43323	43323	8	8.0%_25r	chr4	43323	CR45124	EXON	23	0	0	2	25	99	0	0	0	99	2	25	0	99	chr4_43323
chr4	43324	43324	28	28.0%_25r	chr4	43324	CR45124	EXON	18	0	0	7	25	99	0	0	0	99	7	25	0	99	chr4_43324
chr4	43328	43328	17.4	17.4%_23r	chr4	43328	CR45124	EXON	19	0	0	4	23	91	0	0	0	91	4	23	0	91	chr4_43328
chr4	43333	43333	7.4	7.4%_27r	chr4	43333	CR45124	EXON	25	0	0	2	27	109	1	1	0	111	2	27	0	111	chr4_43333
chr4	43368	43368	32.1	32.1%_28r	chr4	43368	CR45124	EXON	19	0	0	9	28	146	0	0	0	146	9	28	0	146	chr4_43368
chr4	43372	43372	9.5	9.5%_21r	chr4	43372	CR45124	EXON	19	0	0	2	21	92	0	0	0	92	2	21	0	92	chr4_43372
chr4	691975	691975	14.3	14.3%_28r	chr4	691975	myo	EXON	0	24	4	0	28	0	62	0	0	62	4	28	0	62	chr4_691975
chr4	691992	691992	10.3	10.3%_29r	chr4	691992	myo	EXON	0	26	3	0	29	0	49	0	0	49	3	29	0	49	chr4_691992
chr4	692020	692020	25	25.0%_20r	chr4	692020	myo	EXON	0	15	5	0	20	0	62	0	1	63	5	20	0	63	chr4_692020
chr4	692023	692023	12.5	12.5%_24r	chr4	692023	myo	EXON	0	21	3	0	24	0	68	0	0	68	3	24	0	68	chr4_692023
chr4	692029	692029	19.2	19.2%_26r	chr4	692029	myo	EXON	0	21	5	0	26	0	73	0	0	73	5	26	0	73	chr4_692029
chr4	692052	692052	20	20.0%_25r	chr4	692052	myo	EXON	0	20	5	0	25	0	72	0	1	73	5	25	0	73	chr4_692052
chr4	692066	692066	20.8	20.8%_24r	chr4	692066	myo	EXON	0	19	5	0	24	0	65	0	0	65	5	24	0	65	chr4_692066
chr4	692086	692086	13	13.0%_23r	chr4	692086	myo	EXON	0	20	3	0	23	0	55	0	1	56	3	23	0	56	chr4_692086
chr4	692087	692087	8.7	8.7%_23r	chr4	692087	myo	EXON	0	21	2	0	23	0	55	0	1	56	2	23	0	56	chr4_692087
chr4	692090	692090	9.5	9.5%_21r	chr4	692090	myo	EXON	0	19	2	0	21	0	59	0	0	59	2	21	0	59	chr4_692090
chr4	692110	692110	6.5	6.5%_31r	chr4	692110	myo	EXON	0	29	2	0	31	0	86	0	0	86	2	31	0	86	chr4_692110
chr4	692117	692117	10.7	10.7%_28r	chr4	692117	myo	EXON	0	25	3	0	28	0	97	0	0	97	3	28	0	97	chr4_692117
chr4	692123	692123	10.7	10.7%_28r	chr4	692123	myo	EXON	1	24	3	0	28	0	107	0	0	107	3	28	0	107	chr4_692123
chr4	692129	692129	6.2	6.2%_32r	chr4	692129	myo	EXON	0	29	2	1	32	0	105	0	0	105	2	32	0	105	chr4_692129
chr4	692132	692132	16.7	16.7%_36r	chr4	692132	myo	EXON	0	30	6	0	36	0	105	0	0	105	6	36	0	105	chr4_692132
chr4	692168	692168	8.8	8.8%_34r	chr4	692168	myo	EXON	0	31	3	0	34	1	112	0	0	113	3	34	0	113	chr4_692168
chr4	692169	692169	17.6	17.6%_34r	chr4	692169	myo	EXON	0	28	6	0	34	0	114	0	0	114	6	34	0	114	chr4_692169
chr4	692206	692206	6.7	6.7%_30r	chr4	692206	myo	EXON	0	28	2	0	30	0	67	0	1	68	2	30	0	68	chr4_692206
chr4	692210	692210	12.9	12.9%_31r	chr4	692210	myo	EXON	0	26	4	1	31	0	64	0	0	64	4	31	0	64	chr4_692210
chr4	692213	692213	34.4	34.4%_32r	chr4	692213	myo	EXON	0	21	11	0	32	0	68	0	0	68	11	32	0	68	chr4_692213
chr4	692250	692250	15.2	15.2%_33r	chr4	692250	myo	EXON	0	28	5	0	33	0	77	0	0	77	5	33	0	77	chr4_692250
chr4	692259	692259	13	13.0%_23r	chr4	692259	myo	EXON	0	20	3	0	23	0	106	0	1	107	3	23	0	107	chr4_692259
chr4	692304	692304	53.3	53.3%_30r	chr4	692304	myo	EXON	0	14	16	0	30	0	210	0	0	210	16	30	0	210	chr4_692304
chr4	692316	692316	8	8.0%_25r	chr4	692316	myo	EXON	0	23	2	0	25	0	110	0	0	110	2	25	0	110	chr4_692316
chr4	692461	692461	7.7	7.7%_26r	chr4	692461	myo	EXON	0	24	2	0	26	0	84	0	0	84	2	26	0	84	chr4_692461
chr4	692491	692491	8.3	8.3%_24r	chr4	692491	myo	EXON	0	22	2	0	24	0	72	0	0	72	2	24	0	72	chr4_692491
chr4	692494	692494	8.3	8.3%_24r	chr4	692494	myo	EXON	0	22	2	0	24	0	85	0	0	85	2	24	0	85	chr4_692494
chr4	692540	692540	28.6	28.6%_21r	chr4	692540	myo	EXON	0	15	6	0	21	0	87	0	0	87	6	21	0	87	chr4_692540
chr4	692541	692541	9.5	9.5%_21r	chr4	692541	myo	EXON	0	19	2	0	21	0	92	0	0	92	2	21	0	92	chr4_692541
chr4	692542	692542	25	25.0%_20r	chr4	692542	myo	EXON	0	15	5	0	20	0	93	0	0	93	5	20	0	93	chr4_692542
chr4	692560	692560	20	20.0%_20r	chr4	692560	myo	EXON	0	16	4	0	20	0	91	0	0	91	4	20	0	91	chr4_692560
chr4	692615	692615	15	15.0%_20r	chr4	692615	myo	EXON	0	17	3	0	20	0	86	0	0	86	3	20	0	86	chr4_692615
chr4	692669	692669	23.1	23.1%_26r	chr4	692669	myo	EXON	0	20	6	0	26	0	82	0	0	82	6	26	0	82	chr4_692669
chr4	692673	692673	20.8	20.8%_24r	chr4	692673	myo	EXON	0	19	5	0	24	0	73	0	0	73	5	24	0	73	chr4_692673
chr4	692722	692722	11.5	11.5%_26r	chr4	692722	myo	EXON	0	23	3	0	26	0	88	0	0	88	3	26	0	88	chr4_692722
chr4	692740	692740	10	10.0%_20r	chr4	692740	myo	EXON	0	18	2	0	20	0	94	0	0	94	2	20	0	94	chr4_692740
chr4	692744	692744	19	19.0%_21r	chr4	692744	myo	EXON	0	17	4	0	21	1	103	0	0	104	4	21	0	104	chr4_692744
chr4	692781	692781	25	25.0%_20r	chr4	692781	myo	EXON	0	15	5	0	20	0	58	0	0	58	5	20	0	58	chr4_692781
chr4	692790	692790	10	10.0%_20r	chr4	692790	myo	EXON	0	18	2	0	20	0	51	0	0	51	2	20	0	51	chr4_692790
chr4	693447	693447	7.1	7.1%_28r	chr4	693447	myo	EXON	0	26	2	0	28	0	89	0	0	89	2	28	0	89	chr4_693447
chr4	693769	693769	8	8.0%_25r	chr4	693769	myo	EXON	0	23	2	0	25	0	90	0	1	91	2	25	0	91	chr4_693769
chr4	693771	693771	12	12.0%_25r	chr4	693771	myo	EXON	0	22	3	0	25	0	102	0	0	102	3	25	0	102	chr4_693771
chr4	694089	694089	9.5	9.5%_21r	chr4	694089	myo	EXON	0	19	2	0	21	0	65	0	0	65	2	21	0	65	chr4_694089
chr4	694096	694096	9.5	9.5%_21r	chr4	694096	myo	EXON	0	19	2	0	21	0	56	0	0	56	2	21	0	56	chr4_694096
chr4	694100	694100	8.7	8.7%_23r	chr4	694100	myo	EXON	0	21	2	0	23	0	51	0	0	51	2	23	0	51	chr4_694100
chr4	694112	694112	8	8.0%_25r	chr4	694112	myo	EXON	0	23	2	0	25	0	67	0	0	67	2	25	0	67	chr4_694112
chr4	694132	694132	16.7	16.7%_30r	chr4	694132	myo	EXON	0	25	5	0	30	0	73	0	0	73	5	30	0	73	chr4_694132
chr4	694138	694138	7.7	7.7%_26r	chr4	694138	myo	EXON	0	24	2	0	26	0	64	0	0	64	2	26	0	64	chr4_694138
chr4	694181	694181	15	15.0%_20r	chr4	694181	myo	EXON	0	17	3	0	20	0	73	0	0	73	3	20	0	73	chr4_694181
chr4	694393	694393	19	19.0%_21r	chr4	694393	myo	EXON	0	17	4	0	21	0	77	0	0	77	4	21	0	77	chr4_694393
chr4	694394	694394	61.9	61.9%_21r	chr4	694394	myo	EXON	0	8	13	0	21	0	76	0	0	76	13	21	0	76	chr4_694394
chr4	695356	695356	11.5	11.5%_26r	chr4	695356	myo	EXON	0	23	3	0	26	0	68	0	0	68	3	26	0	68	chr4_695356
chr4	695391	695391	57.7	57.7%_26r	chr4	695391	myo	EXON	0	11	15	0	26	0	55	0	0	55	15	26	0	55	chr4_695391
chr4	695414	695414	46.4	46.4%_28r	chr4	695414	myo	EXON	0	15	13	0	28	0	54	0	0	54	13	28	0	54	chr4_695414
chr4	695415	695415	14.8	14.8%_27r	chr4	695415	myo	EXON	0	23	4	0	27	0	53	0	0	53	4	27	0	53	chr4_695415
chr4	695430	695430	7.7	7.7%_26r	chr4	695430	myo	EXON	0	24	2	0	26	0	48	0	0	48	2	26	0	48	chr4_695430
chr4	695431	695431	7.7	7.7%_26r	chr4	695431	myo	EXON	0	24	2	0	26	0	49	0	0	49	2	26	0	49	chr4_695431
chr4	695432	695432	19.2	19.2%_26r	chr4	695432	myo	EXON	0	21	5	0	26	0	49	0	0	49	5	26	0	49	chr4_695432
chr4	695771	695771	9.5	9.5%_21r	chr4	695771	myo	EXON	0	19	2	0	21	0	40	0	0	40	2	21	0	40	chr4_695771
chr4	695799	695799	9.1	9.1%_22r	chr4	695799	myo	EXON	0	20	2	0	22	0	67	0	0	67	2	22	0	67	chr4_695799
chr4	481084	481084	8.3	8.3%_24r	chr4	481084	Asator	EXON	0	22	2	0	24	0	64	0	0	64	2	24	0	64	chr4_481084
chr4	69623	69623	41.2	41.2%_34r	chr4	69623	pan	EXON	20	0	0	14	34	17	0	0	0	17	14	34	0	17	chr4_69623
chr4	69630	69630	7.9	7.9%_38r	chr4	69630	pan	EXON	35	0	0	3	38	12	0	0	0	12	3	38	0	12	chr4_69630
chr4	69730	69730	11.5	11.5%_61r	chr4	69730	pan	EXON	54	0	0	7	61	10	0	0	0	10	7	61	0	10	chr4_69730
chr4	69731	69731	21.3	21.3%_61r	chr4	69731	pan	EXON	48	0	0	13	61	10	0	0	0	10	13	61	0	10	chr4_69731
chr4	69742	69742	33.3	33.3%_42r	chr4	69742	pan	EXON	28	0	0	14	42	12	0	0	0	12	14	42	0	12	chr4_69742
chr4	69743	69743	16.7	16.7%_42r	chr4	69743	pan	EXON	35	0	0	7	42	14	0	0	0	14	7	42	0	14	chr4_69743
chr4	69746	69746	9.6	9.6%_52r	chr4	69746	pan	EXON	47	0	0	5	52	14	0	0	0	14	5	52	0	14	chr4_69746
chr4	69812	69812	6.2	6.2%_32r	chr4	69812	pan	EXON	30	0	0	2	32	11	0	0	0	11	2	32	0	11	chr4_69812
chr4	69971	69971	69.2	69.2%_39r	chr4	69971	pan	EXON	11	1	0	27	39	11	0	0	0	11	27	39	0	11	chr4_69971
chr4	69972	69972	47.4	47.4%_38r	chr4	69972	pan	EXON	20	0	0	18	38	11	0	0	0	11	18	38	0	11	chr4_69972
chr4	72349	72349	34.5	34.5%_55r	chr4	72349	pan	EXON	36	0	0	19	55	34	0	0	0	34	19	55	0	34	chr4_72349
chr4	72353	72353	6.6	6.6%_61r	chr4	72353	pan	EXON	56	1	0	4	61	33	0	0	0	33	4	61	0	33	chr4_72353
chr4	72360	72360	11.5	11.5%_61r	chr4	72360	pan	EXON	54	0	0	7	61	30	0	0	0	30	7	61	0	30	chr4_72360
chr4	72366	72366	6.2	6.2%_65r	chr4	72366	pan	EXON	61	0	0	4	65	32	0	0	0	32	4	65	0	32	chr4_72366
chr4	72367	72367	12.3	12.3%_65r	chr4	72367	pan	EXON	57	0	0	8	65	31	1	0	0	32	8	65	0	32	chr4_72367
chr4	72370	72370	13.6	13.6%_66r	chr4	72370	pan	EXON	57	0	0	9	66	29	0	0	0	29	9	66	0	29	chr4_72370
chr4	72402	72402	15.9	15.9%_44r	chr4	72402	pan	EXON	37	0	0	7	44	17	0	0	0	17	7	44	0	17	chr4_72402
chr4	72425	72425	22.8	22.8%_57r	chr4	72425	pan	EXON	44	0	0	13	57	19	0	0	0	19	13	57	0	19	chr4_72425
chr4	72443	72443	18.8	18.8%_64r	chr4	72443	pan	EXON	52	0	0	12	64	27	0	0	0	27	12	64	0	27	chr4_72443
chr4	72445	72445	13	13.0%_54r	chr4	72445	pan	EXON	47	0	0	7	54	29	0	0	0	29	7	54	0	29	chr4_72445
chr4	72448	72448	80.4	80.4%_46r	chr4	72448	pan	EXON	9	0	0	37	46	29	0	0	0	29	37	46	0	29	chr4_72448
chr4	72481	72481	86	86.0%_43r	chr4	72481	pan	EXON	6	0	0	37	43	46	0	0	0	46	37	43	0	46	chr4_72481
chr4	72489	72489	41	41.0%_39r	chr4	72489	pan	EXON	23	0	0	16	39	35	0	0	0	35	16	39	0	35	chr4_72489
chr4	72494	72494	71.8	71.8%_39r	chr4	72494	pan	EXON	11	0	0	28	39	32	0	0	0	32	28	39	0	32	chr4_72494
chr4	72496	72496	15	15.0%_40r	chr4	72496	pan	EXON	33	0	1	6	40	34	0	0	0	34	6	40	0	34	chr4_72496
chr4	72515	72515	11.5	11.5%_52r	chr4	72515	pan	EXON	46	0	0	6	52	30	0	1	0	31	6	52	0	31	chr4_72515
chr4	72552	72552	16.9	16.9%_65r	chr4	72552	pan	EXON	54	0	0	11	65	21	0	0	0	21	11	65	0	21	chr4_72552
chr4	72558	72558	10.8	10.8%_65r	chr4	72558	pan	EXON	58	0	0	7	65	18	0	0	0	18	7	65	0	18	chr4_72558
chr4	72562	72562	6.6	6.6%_76r	chr4	72562	pan	EXON	71	0	0	5	76	19	0	0	0	19	5	76	0	19	chr4_72562
chr4	72563	72563	14.7	14.7%_75r	chr4	72563	pan	EXON	64	0	0	11	75	18	0	0	0	18	11	75	0	18	chr4_72563
chr4	72821	72821	14.6	14.6%_41r	chr4	72821	pan	EXON	35	0	0	6	41	14	0	0	0	14	6	41	0	14	chr4_72821
chr4	72830	72830	6.5	6.5%_46r	chr4	72830	pan	EXON	43	0	0	3	46	18	0	0	0	18	3	46	0	18	chr4_72830
chr4	72838	72838	70.2	70.2%_47r	chr4	72838	pan	EXON	14	0	0	33	47	19	0	0	0	19	33	47	0	19	chr4_72838
chr4	72848	72848	10	10.0%_60r	chr4	72848	pan	EXON	54	0	0	6	60	20	0	0	0	20	6	60	0	20	chr4_72848
chr4	75070	75070	10.7	10.7%_56r	chr4	75070	pan	EXON	50	0	0	6	56	32	0	0	0	32	6	56	0	32	chr4_75070
chr4	75071	75071	12.5	12.5%_56r	chr4	75071	pan	EXON	49	0	0	7	56	32	0	0	0	32	7	56	0	32	chr4_75071
chr4	75091	75091	8.2	8.2%_85r	chr4	75091	pan	EXON	78	0	0	7	85	55	0	0	0	55	7	85	0	55	chr4_75091
chr4	75111	75111	10	10.0%_50r	chr4	75111	pan	EXON	45	0	0	5	50	44	0	0	0	44	5	50	0	44	chr4_75111
chr4	75128	75128	18.6	18.6%_43r	chr4	75128	pan	EXON	35	0	0	8	43	42	0	0	0	42	8	43	0	42	chr4_75128
chr4	75163	75163	24.3	24.3%_37r	chr4	75163	pan	EXON	28	0	0	9	37	26	0	0	0	26	9	37	0	26	chr4_75163
chr4	82645	82645	8.6	8.6%_35r	chr4	82645	pan	EXON	32	0	0	3	35	22	0	0	0	22	3	35	0	22	chr4_82645
chr4	82674	82674	20	20.0%_25r	chr4	82674	pan	EXON	20	0	0	5	25	24	0	0	0	24	5	25	0	24	chr4_82674
chr4	82675	82675	13.5	13.5%_37r	chr4	82675	pan	EXON	32	0	0	5	37	25	1	0	0	26	5	37	0	26	chr4_82675
chr4	82688	82688	10.6	10.6%_47r	chr4	82688	pan	EXON	42	0	0	5	47	31	0	0	0	31	5	47	0	31	chr4_82688
chr4	82703	82703	9.5	9.5%_42r	chr4	82703	pan	EXON	38	0	0	4	42	27	0	0	0	27	4	42	0	27	chr4_82703
chr4	82740	82740	7.2	7.2%_97r	chr4	82740	pan	EXON	90	0	0	7	97	34	0	0	0	34	7	97	0	34	chr4_82740
chr4	82741	82741	6.2	6.2%_96r	chr4	82741	pan	EXON	90	0	0	6	96	34	0	0	0	34	6	96	0	34	chr4_82741
chr4	85716	85716	16.7	16.7%_66r	chr4	85716	pan	EXON	55	0	0	11	66	49	0	0	0	49	11	66	0	49	chr4_85716
chr4	85717	85717	70.8	70.8%_65r	chr4	85717	pan	EXON	19	0	0	46	65	49	0	0	0	49	46	65	0	49	chr4_85717
chr4	85725	85725	10.1	10.1%_79r	chr4	85725	pan	EXON	71	0	0	8	79	44	0	0	0	44	8	79	0	44	chr4_85725
chr4	85731	85731	7.1	7.1%_99r	chr4	85731	pan	EXON	91	1	0	7	99	60	0	0	0	60	7	99	0	60	chr4_85731
chr4	85770	85770	6.1	6.1%_66r	chr4	85770	pan	EXON	62	0	0	4	66	65	0	0	0	65	4	66	0	65	chr4_85770
chr4	85771	85771	14.1	14.1%_64r	chr4	85771	pan	EXON	55	0	0	9	64	63	0	0	0	63	9	64	0	63	chr4_85771
chr4	85788	85788	14.3	14.3%_56r	chr4	85788	pan	EXON	48	0	0	8	56	52	0	0	0	52	8	56	0	52	chr4_85788
chr4	85794	85794	6	6.0%_50r	chr4	85794	pan	EXON	47	0	0	3	50	53	0	0	0	53	3	50	0	53	chr4_85794
chr4	85797	85797	9.6	9.6%_52r	chr4	85797	pan	EXON	47	0	0	5	52	54	0	0	0	54	5	52	0	54	chr4_85797
chr4	85857	85857	29.3	29.3%_58r	chr4	85857	pan	EXON	41	0	0	17	58	48	0	0	0	48	17	58	0	48	chr4_85857
chr4	85870	85870	12.1	12.1%_66r	chr4	85870	pan	EXON	58	0	0	8	66	33	0	0	0	33	8	66	0	33	chr4_85870
chr4	85881	85881	6.8	6.8%_59r	chr4	85881	pan	EXON	55	0	0	4	59	33	0	0	0	33	4	59	0	33	chr4_85881
chr4	85887	85887	15	15.0%_60r	chr4	85887	pan	EXON	51	0	0	9	60	36	0	0	0	36	9	60	0	36	chr4_85887
chr4	85890	85890	9.1	9.1%_66r	chr4	85890	pan	EXON	60	0	0	6	66	40	0	0	0	40	6	66	0	40	chr4_85890
chr4	85932	85932	23.3	23.3%_43r	chr4	85932	pan	EXON	33	0	0	10	43	29	0	0	0	29	10	43	0	29	chr4_85932
chr4	87042	87042	16.7	16.7%_48r	chr4	87042	pan	EXON	40	0	0	8	48	36	0	0	0	36	8	48	0	36	chr4_87042
chr4	87056	87056	9.8	9.8%_51r	chr4	87056	pan	EXON	46	0	0	5	51	29	0	0	0	29	5	51	0	29	chr4_87056
chr4	87066	87066	9.3	9.3%_43r	chr4	87066	pan	EXON	38	1	0	4	43	40	1	0	0	41	4	43	0	41	chr4_87066
chr4	87076	87076	11.8	11.8%_51r	chr4	87076	pan	EXON	45	0	0	6	51	38	0	0	0	38	6	51	0	38	chr4_87076
chr4	87117	87117	17	17.0%_53r	chr4	87117	pan	EXON	44	0	0	9	53	32	0	0	0	32	9	53	0	32	chr4_87117
chr4	87118	87118	9.4	9.4%_53r	chr4	87118	pan	EXON	48	0	0	5	53	33	0	0	0	33	5	53	0	33	chr4_87118
chr4	87122	87122	6.2	6.2%_48r	chr4	87122	pan	EXON	45	0	0	3	48	30	0	0	0	30	3	48	0	30	chr4_87122
chr4	87136	87136	10.2	10.2%_49r	chr4	87136	pan	EXON	43	1	0	5	49	33	0	0	0	33	5	49	0	33	chr4_87136
chr4	87164	87164	7.4	7.4%_27r	chr4	87164	pan	EXON	25	0	0	2	27	21	0	0	0	21	2	27	0	21	chr4_87164
chr4	87165	87165	11.1	11.1%_27r	chr4	87165	pan	EXON	24	0	0	3	27	21	0	0	0	21	3	27	0	21	chr4_87165
chr4	94440	94440	25	25.0%_24r	chr4	94440	pan	EXON	18	0	0	6	24	27	0	0	0	27	6	24	0	27	chr4_94440
chr4	94502	94502	7.9	7.9%_38r	chr4	94502	pan	EXON	35	0	0	3	38	22	0	0	0	22	3	38	0	22	chr4_94502
chr4	94506	94506	6.5	6.5%_31r	chr4	94506	pan	EXON	29	0	0	2	31	20	0	0	0	20	2	31	0	20	chr4_94506
chr4	94517	94517	6.1	6.1%_33r	chr4	94517	pan	EXON	31	0	0	2	33	29	0	0	0	29	2	33	0	29	chr4_94517
chr4	94539	94539	7.7	7.7%_65r	chr4	94539	pan	EXON	60	0	0	5	65	30	0	0	0	30	5	65	0	30	chr4_94539
chr4	94554	94554	11.6	11.6%_43r	chr4	94554	pan	EXON	38	0	0	5	43	23	0	0	0	23	5	43	0	23	chr4_94554
chr4	94578	94578	18.4	18.4%_38r	chr4	94578	pan	EXON	31	0	0	7	38	20	0	0	0	20	7	38	0	20	chr4_94578
chr4	94595	94595	7.4	7.4%_27r	chr4	94595	pan	EXON	25	0	0	2	27	12	0	0	0	12	2	27	0	12	chr4_94595
chr4	94899	94899	15.4	15.4%_39r	chr4	94899	pan	EXON	33	0	0	6	39	19	0	0	0	19	6	39	0	19	chr4_94899
chr4	94906	94906	7	7.0%_43r	chr4	94906	pan	EXON	40	0	0	3	43	21	0	0	0	21	3	43	0	21	chr4_94906
chr4	94949	94949	7.1	7.1%_28r	chr4	94949	pan	EXON	26	0	0	2	28	12	0	0	0	12	2	28	0	12	chr4_94949
chr4	108249	108249	7.5	7.5%_40r	chr4	108249	pan	EXON	37	0	0	3	40	10	0	0	0	10	3	40	0	10	chr4_108249
chr4	108255	108255	10.3	10.3%_29r	chr4	108255	pan	EXON	26	0	0	3	29	12	0	0	0	12	3	29	0	12	chr4_108255
chr4	108258	108258	64.3	64.3%_28r	chr4	108258	pan	EXON	10	0	0	18	28	12	0	0	0	12	18	28	0	12	chr4_108258
chr4	108262	108262	7.4	7.4%_27r	chr4	108262	pan	EXON	25	0	0	2	27	10	0	0	0	10	2	27	0	10	chr4_108262
chr4	108269	108269	12.8	12.8%_39r	chr4	108269	pan	EXON	34	0	0	5	39	11	0	0	0	11	5	39	0	11	chr4_108269
chr4	450289	450289	20	20.0%_20r	chr4	450289	CaMKI	EXON	16	0	0	4	20	146	0	0	0	146	4	20	0	146	chr4_450289
chr4	450309	450309	6.9	6.9%_29r	chr4	450309	CaMKI	EXON	27	0	0	2	29	101	0	0	0	101	2	29	0	101	chr4_450309
chr4	450446	450446	8.7	8.7%_23r	chr4	450446	CaMKI	EXON	21	0	0	2	23	168	0	0	0	168	2	23	0	168	chr4_450446
chr4	450472	450472	12	12.0%_25r	chr4	450472	CaMKI	EXON	22	0	0	3	25	126	0	0	0	126	3	25	0	126	chr4_450472
chr4	450481	450481	23.8	23.8%_21r	chr4	450481	CaMKI	EXON	16	0	0	5	21	111	0	0	0	111	5	21	0	111	chr4_450481
chr4	450484	450484	9.5	9.5%_21r	chr4	450484	CaMKI	EXON	19	0	0	2	21	109	0	0	0	109	2	21	0	109	chr4_450484
chr4	450485	450485	23.8	23.8%_21r	chr4	450485	CaMKI	EXON	16	0	0	5	21	109	1	0	0	110	5	21	0	110	chr4_450485
chr4	451195	451195	10	10.0%_20r	chr4	451195	CaMKI	EXON	18	0	0	2	20	70	0	0	0	70	2	20	0	70	chr4_451195
chr4	451206	451206	28.6	28.6%_21r	chr4	451206	CaMKI	EXON	15	0	0	6	21	112	0	0	0	112	6	21	0	112	chr4_451206
chr4	451209	451209	11.1	11.1%_27r	chr4	451209	CaMKI	EXON	24	0	0	3	27	123	2	0	0	125	3	27	0	125	chr4_451209
chr4	451260	451260	12.5	12.5%_24r	chr4	451260	CaMKI	EXON	21	0	0	3	24	77	1	0	0	78	3	24	0	78	chr4_451260
chr4	451277	451277	36.4	36.4%_22r	chr4	451277	CaMKI	EXON	14	0	0	8	22	96	0	0	0	96	8	22	0	96	chr4_451277
chr4	451286	451286	8.3	8.3%_24r	chr4	451286	CaMKI	EXON	22	0	0	2	24	85	0	0	0	85	2	24	0	85	chr4_451286
chr4	451333	451333	6.2	6.2%_32r	chr4	451333	CaMKI	EXON	30	0	0	2	32	73	0	0	0	73	2	32	0	73	chr4_451333
chr4	451346	451346	25.8	25.8%_31r	chr4	451346	CaMKI	EXON	23	0	0	8	31	92	1	0	0	93	8	31	0	93	chr4_451346
chr4	451347	451347	61.3	61.3%_31r	chr4	451347	CaMKI	EXON	10	2	0	19	31	104	0	0	0	104	19	31	0	104	chr4_451347
chr4	451348	451348	40	40.0%_30r	chr4	451348	CaMKI	EXON	18	0	0	12	30	100	1	0	0	101	12	30	0	101	chr4_451348
chr4	451393	451393	18.5	18.5%_27r	chr4	451393	CaMKI	EXON	22	0	0	5	27	117	0	0	0	117	5	27	0	117	chr4_451393
chr4	451413	451413	30	30.0%_20r	chr4	451413	CaMKI	EXON	14	0	0	6	20	81	0	0	0	81	6	20	0	81	chr4_451413
chr4	452703	452703	13.3	13.3%_30r	chr4	452703	CaMKI	EXON	26	0	0	4	30	138	0	0	0	138	4	30	0	138	chr4_452703
chr4	452738	452738	9.5	9.5%_21r	chr4	452738	CaMKI	EXON	19	0	0	2	21	88	0	0	0	88	2	21	0	88	chr4_452738
chr4	452828	452828	10	10.0%_20r	chr4	452828	CaMKI	EXON	18	0	0	2	20	72	0	0	0	72	2	20	0	72	chr4_452828
chr4	452979	452979	14.8	14.8%_27r	chr4	452979	CaMKI	EXON	23	0	0	4	27	111	1	1	0	113	4	27	0	113	chr4_452979
chr4	452982	452982	25.9	25.9%_27r	chr4	452982	CaMKI	EXON	20	0	0	7	27	114	0	0	0	114	7	27	0	114	chr4_452982
chr4	452990	452990	40	40.0%_25r	chr4	452990	CaMKI	EXON	15	0	0	10	25	112	1	0	0	113	10	25	0	113	chr4_452990
chr4	452992	452992	8	8.0%_25r	chr4	452992	CaMKI	EXON	23	0	0	2	25	106	0	0	0	106	2	25	0	106	chr4_452992
chr4	453077	453077	40	40.0%_20r	chr4	453077	CaMKI	EXON	12	0	0	8	20	120	0	1	0	121	8	20	0	121	chr4_453077
chr4	453080	453080	23.8	23.8%_21r	chr4	453080	CaMKI	EXON	16	0	0	5	21	108	0	0	0	108	5	21	0	108	chr4_453080
chr4	386593	386593	15	15.0%_20r	chr4	386593	Lin29	INTRON	0	17	3	0	20	0	45	0	0	45	3	20	0	45	chr4_386593
chr4	386594	386594	10	10.0%_20r	chr4	386594	Lin29	INTRON	0	18	2	0	20	0	45	0	0	45	2	20	0	45	chr4_386594
chr4	386605	386605	9.5	9.5%_21r	chr4	386605	Lin29	INTRON	0	19	2	0	21	0	49	0	0	49	2	21	0	49	chr4_386605
chr4	386607	386607	8.7	8.7%_23r	chr4	386607	Lin29	INTRON	0	21	2	0	23	0	47	0	0	47	2	23	0	47	chr4_386607
chr4	386713	386713	9.1	9.1%_22r	chr4	386713	Lin29	INTRON	0	20	2	0	22	0	73	0	0	73	2	22	0	73	chr4_386713
chr4	386726	386726	7.7	7.7%_26r	chr4	386726	Lin29	INTRON	0	24	2	0	26	0	107	0	0	107	2	26	0	107	chr4_386726
chr4	386809	386809	9.8	9.8%_41r	chr4	386809	Lin29	INTRON	0	37	4	0	41	0	127	0	0	127	4	41	0	127	chr4_386809
chr4	386835	386835	7.1	7.1%_42r	chr4	386835	Lin29	INTRON	0	39	3	0	42	0	101	0	0	101	3	42	0	101	chr4_386835
chr4	386846	386846	32.6	32.6%_43r	chr4	386846	Lin29	INTRON	0	29	14	0	43	0	108	0	0	108	14	43	0	108	chr4_386846
chr4	386848	386848	22.9	22.9%_48r	chr4	386848	Lin29	INTRON	0	37	11	0	48	0	113	0	0	113	11	48	0	113	chr4_386848
chr4	386850	386850	6.1	6.1%_49r	chr4	386850	Lin29	INTRON	0	46	3	0	49	0	118	0	0	118	3	49	0	118	chr4_386850
chr4	386875	386875	6.1	6.1%_66r	chr4	386875	Lin29	INTRON	0	62	4	0	66	0	148	0	0	148	4	66	0	148	chr4_386875
chr4	386880	386880	6.1	6.1%_66r	chr4	386880	Lin29	INTRON	0	62	4	0	66	0	147	0	0	147	4	66	0	147	chr4_386880
chr4	386928	386928	19.4	19.4%_36r	chr4	386928	Lin29	EXON	0	29	7	0	36	0	53	0	0	53	7	36	0	53	chr4_386928
chr4	386943	386943	6.5	6.5%_31r	chr4	386943	Lin29	EXON	0	29	2	0	31	0	44	0	0	44	2	31	0	44	chr4_386943
chr4	386948	386948	10	10.0%_30r	chr4	386948	Lin29	EXON	0	27	3	0	30	0	42	0	0	42	3	30	0	42	chr4_386948
chr4	386963	386963	7.1	7.1%_42r	chr4	386963	Lin29	EXON	0	39	3	0	42	0	51	0	0	51	3	42	0	51	chr4_386963
chr4	386976	386976	6.7	6.7%_45r	chr4	386976	Lin29	EXON	0	42	3	0	45	0	76	0	0	76	3	45	0	76	chr4_386976
chr4	395570	395570	7.4	7.4%_27r	chr4	395570	Lin29	EXON	0	25	2	0	27	0	116	0	0	116	2	27	0	116	chr4_395570
chr4	395575	395575	11.4	11.4%_35r	chr4	395575	Lin29	EXON	0	31	4	0	35	0	124	0	0	124	4	35	0	124	chr4_395575
chr4	215045	215045	10	10.0%_20r	chr4	215045	CG31999	EXON	0	18	2	0	20	0	23	0	0	23	2	20	0	23	chr4_215045
chr4	215076	215076	12.5	12.5%_24r	chr4	215076	CG31999	EXON	0	21	3	0	24	0	24	0	0	24	3	24	0	24	chr4_215076
chr4	215078	215078	33.3	33.3%_21r	chr4	215078	CG31999	EXON	0	14	7	0	21	0	24	0	0	24	7	21	0	24	chr4_215078
chr4	215185	215185	19	19.0%_21r	chr4	215185	CG31999	EXON	0	17	4	0	21	0	34	0	0	34	4	21	0	34	chr4_215185
chr4	215247	215247	10	10.0%_20r	chr4	215247	CG31999	EXON	0	18	2	0	20	0	25	0	0	25	2	20	0	25	chr4_215247
chr4	215460	215460	8.3	8.3%_24r	chr4	215460	CG31999	EXON	0	22	2	0	24	0	37	0	0	37	2	24	0	37	chr4_215460
chr4	218263	218263	8.3	8.3%_24r	chr4	218263	CG31999	EXON	0	22	2	0	24	0	18	0	0	18	2	24	0	18	chr4_218263
chr4	218313	218313	35	35.0%_20r	chr4	218313	CG31999	EXON	0	13	7	0	20	0	39	0	0	39	7	20	0	39	chr4_218313
chr4	218326	218326	8.3	8.3%_24r	chr4	218326	CG31999	EXON	0	22	2	0	24	0	41	0	0	41	2	24	0	41	chr4_218326
chr4	218354	218354	17.4	17.4%_23r	chr4	218354	CG31999	EXON	0	19	4	0	23	0	31	0	0	31	4	23	0	31	chr4_218354
chr4	218461	218461	8	8.0%_25r	chr4	218461	CG31999	EXON	0	23	2	0	25	0	21	0	0	21	2	25	0	21	chr4_218461
chr4	218468	218468	6.1	6.1%_33r	chr4	218468	CG31999	EXON	0	31	2	0	33	0	28	0	0	28	2	33	0	28	chr4_218468
chr4	218472	218472	7.1	7.1%_28r	chr4	218472	CG31999	EXON	0	26	2	0	28	0	31	0	0	31	2	28	0	31	chr4_218472
chr4	218489	218489	10.7	10.7%_28r	chr4	218489	CG31999	EXON	1	24	3	0	28	0	28	0	0	28	3	28	0	28	chr4_218489
chr4	218499	218499	8.3	8.3%_24r	chr4	218499	CG31999	EXON	0	22	2	0	24	0	20	0	0	20	2	24	0	20	chr4_218499
chr4	218680	218680	20.8	20.8%_24r	chr4	218680	CG31999	EXON	0	19	5	0	24	0	18	0	0	18	5	24	0	18	chr4_218680
chr4	223729	223729	15	15.0%_20r	chr4	223729	CG31999	EXON	0	17	3	0	20	0	27	0	0	27	3	20	0	27	chr4_223729
chr4	223750	223750	10	10.0%_20r	chr4	223750	CG31999	EXON	0	18	2	0	20	0	23	0	0	23	2	20	0	23	chr4_223750
chr4	223792	223792	57.1	57.1%_21r	chr4	223792	CG31999	EXON	0	9	12	0	21	0	34	0	0	34	12	21	0	34	chr4_223792
chr4	223836	223836	8.3	8.3%_24r	chr4	223836	CG31999	EXON	0	22	2	0	24	0	39	0	0	39	2	24	0	39	chr4_223836
chr4	223850	223850	9.4	9.4%_32r	chr4	223850	CG31999	EXON	0	29	3	0	32	0	31	0	0	31	3	32	0	31	chr4_223850
chr4	223862	223862	6.7	6.7%_30r	chr4	223862	CG31999	EXON	0	28	2	0	30	0	26	0	0	26	2	30	0	26	chr4_223862
chr4	223863	223863	20	20.0%_30r	chr4	223863	CG31999	EXON	0	24	6	0	30	0	27	0	0	27	6	30	0	27	chr4_223863
chr4	223879	223879	9.4	9.4%_32r	chr4	223879	CG31999	EXON	0	29	3	0	32	0	35	0	0	35	3	32	0	35	chr4_223879
chr4	223883	223883	6.2	6.2%_32r	chr4	223883	CG31999	EXON	0	30	2	0	32	0	37	0	0	37	2	32	0	37	chr4_223883
chr4	223982	223982	10	10.0%_30r	chr4	223982	CG31999	EXON	0	27	3	0	30	0	64	0	0	64	3	30	0	64	chr4_223982
chr4	224087	224087	16	16.0%_25r	chr4	224087	CG31999	EXON	0	21	4	0	25	0	47	0	0	47	4	25	0	47	chr4_224087
chr4	224143	224143	8.3	8.3%_24r	chr4	224143	CG31999	EXON	0	22	2	0	24	0	39	0	0	39	2	24	0	39	chr4_224143
chr4	224200	224200	10.7	10.7%_28r	chr4	224200	CG31999	EXON	0	25	3	0	28	0	51	0	0	51	3	28	0	51	chr4_224200
chr4	224206	224206	16.7	16.7%_30r	chr4	224206	CG31999	EXON	0	25	5	0	30	0	47	0	0	47	5	30	0	47	chr4_224206
chr4	224258	224258	13.2	13.2%_38r	chr4	224258	CG31999	EXON	0	33	5	0	38	0	33	0	0	33	5	38	0	33	chr4_224258
chr4	224270	224270	22.2	22.2%_36r	chr4	224270	CG31999	EXON	0	28	8	0	36	0	31	0	0	31	8	36	0	31	chr4_224270
chr4	224274	224274	8.1	8.1%_37r	chr4	224274	CG31999	EXON	0	34	3	0	37	0	30	0	0	30	3	37	0	30	chr4_224274
chr4	224282	224282	9.1	9.1%_33r	chr4	224282	CG31999	EXON	0	30	3	0	33	0	32	0	0	32	3	33	0	32	chr4_224282
chr4	224300	224300	6.9	6.9%_29r	chr4	224300	CG31999	EXON	0	27	2	0	29	0	34	0	0	34	2	29	0	34	chr4_224300
chr4	224342	224342	7.4	7.4%_27r	chr4	224342	CG31999	EXON	0	25	2	0	27	0	40	0	0	40	2	27	0	40	chr4_224342
chr4	224432	224432	19	19.0%_21r	chr4	224432	CG31999	EXON	1	16	4	0	21	0	42	0	0	42	4	21	0	42	chr4_224432
chr4	664193	664193	10	10.0%_20r	chr4	664193	Slip1	EXON	18	0	0	2	20	94	0	0	0	94	2	20	0	94	chr4_664193
chr4	666865	666865	17.4	17.4%_23r	chr4	666865	Slip1	EXON	18	1	0	4	23	84	0	0	0	84	4	23	0	84	chr4_666865
chr4	666868	666868	8.7	8.7%_23r	chr4	666868	Slip1	EXON	21	0	0	2	23	76	0	0	0	76	2	23	0	76	chr4_666868
chr4	395713	395713	7.1	7.1%_28r	chr4	395713	CR44027	EXON	26	0	0	2	28	92	0	0	0	92	2	28	0	92	chr4_395713
chr4	395740	395740	7.7	7.7%_26r	chr4	395740	CR44027	EXON	24	0	0	2	26	73	0	0	0	73	2	26	0	73	chr4_395740
chr4	395862	395862	30.8	30.8%_26r	chr4	395862	CR44027	EXON	18	0	0	8	26	76	0	0	0	76	8	26	0	76	chr4_395862
chr4	1028772	1028772	7.8	7.8%_77r	chr4	1028772	CR44031	EXON	71	0	0	6	77	337	1	0	0	338	6	77	0	338	chr4_1028772
chr4	1029069	1029069	16	16.0%_50r	chr4	1029069	CR44031	EXON	42	0	0	8	50	214	0	0	0	214	8	50	0	214	chr4_1029069
chr4	1029150	1029150	7.4	7.4%_54r	chr4	1029150	CR44031	EXON	49	0	1	4	54	250	1	2	0	253	4	54	0	253	chr4_1029150
chr4	1029231	1029231	8.8	8.8%_57r	chr4	1029231	CR44031	EXON	52	0	0	5	57	298	0	0	0	298	5	57	0	298	chr4_1029231
chr4	1029259	1029259	8.1	8.1%_37r	chr4	1029259	CR44031	EXON	34	0	0	3	37	237	0	0	0	237	3	37	0	237	chr4_1029259
chr4	1029264	1029264	17.9	17.9%_39r	chr4	1029264	CR44031	EXON	32	0	0	7	39	214	0	0	0	214	7	39	0	214	chr4_1029264
chr4	1029276	1029276	6.2	6.2%_32r	chr4	1029276	CR44031	EXON	30	0	0	2	32	195	0	0	0	195	2	32	0	195	chr4_1029276
chr4	557112	557112	14.8	14.8%_27r	chr4	557112	CR43958	EXON	0	23	4	0	27	0	178	0	0	178	4	27	0	178	chr4_557112
chr4	557125	557125	7.7	7.7%_26r	chr4	557125	CR43958	EXON	0	24	2	0	26	0	160	0	0	160	2	26	0	160	chr4_557125
chr4	557135	557135	6.9	6.9%_29r	chr4	557135	CR43958	EXON	0	27	2	0	29	0	119	0	0	119	2	29	0	119	chr4_557135
chr4	557161	557161	12.5	12.5%_24r	chr4	557161	CR43958	EXON	0	21	3	0	24	0	66	0	0	66	3	24	0	66	chr4_557161
chr4	557176	557176	8.3	8.3%_24r	chr4	557176	CR43958	EXON	0	22	2	0	24	0	66	0	0	66	2	24	0	66	chr4_557176
chr4	557191	557191	11.1	11.1%_27r	chr4	557191	CR43958	EXON	0	24	3	0	27	0	79	0	0	79	3	27	0	79	chr4_557191
chr4	557196	557196	37.5	37.5%_24r	chr4	557196	CR43958	EXON	0	15	9	0	24	0	70	0	0	70	9	24	0	70	chr4_557196
chr4	557197	557197	12.5	12.5%_24r	chr4	557197	CR43958	EXON	0	21	3	0	24	0	71	0	0	71	3	24	0	71	chr4_557197
chr4	557206	557206	19	19.0%_21r	chr4	557206	CR43958	EXON	0	17	4	0	21	0	89	0	0	89	4	21	0	89	chr4_557206
chr4	557228	557228	6.3	6.3%_63r	chr4	557228	CR43958	EXON	0	59	4	0	63	1	310	0	0	311	4	63	0	311	chr4_557228
chr4	557253	557253	42.2	42.2%_45r	chr4	557253	CR43958	EXON	0	26	19	0	45	0	330	0	0	330	19	45	0	330	chr4_557253
chr4	557256	557256	37.8	37.8%_45r	chr4	557256	CR43958	EXON	0	28	17	0	45	0	306	1	0	307	17	45	1	307	chr4_557256
chr4	557524	557524	23.4	23.4%_47r	chr4	557524	CR43958	EXON	0	36	11	0	47	0	217	0	0	217	11	47	0	217	chr4_557524
chr4	557530	557530	6.7	6.7%_45r	chr4	557530	CR43958	EXON	0	42	3	0	45	0	250	0	0	250	3	45	0	250	chr4_557530
chr4	557539	557539	10	10.0%_40r	chr4	557539	CR43958	EXON	0	36	4	0	40	0	212	0	0	212	4	40	0	212	chr4_557539
chr4	557542	557542	9.1	9.1%_44r	chr4	557542	CR43958	EXON	0	40	4	0	44	0	241	0	0	241	4	44	0	241	chr4_557542
chr4	557598	557598	10.7	10.7%_56r	chr4	557598	CR43958	EXON	0	50	6	0	56	0	350	0	0	350	6	56	0	350	chr4_557598
chr4	557614	557614	6.9	6.9%_87r	chr4	557614	CR43958	EXON	0	81	6	0	87	0	454	0	0	454	6	87	0	454	chr4_557614
chr4	557626	557626	10.8	10.8%_65r	chr4	557626	CR43958	EXON	0	58	7	0	65	0	329	0	0	329	7	65	0	329	chr4_557626
chr4	557633	557633	75	75.0%_56r	chr4	557633	CR43958	EXON	0	14	42	0	56	0	266	1	1	268	42	56	1	268	chr4_557633
chr4	557681	557681	9.4	9.4%_32r	chr4	557681	CR43958	EXON	0	29	3	0	32	0	149	0	0	149	3	32	0	149	chr4_557681
chr4	557685	557685	16.7	16.7%_30r	chr4	557685	CR43958	EXON	0	25	5	0	30	0	124	0	0	124	5	30	0	124	chr4_557685
chr4	557702	557702	11.1	11.1%_27r	chr4	557702	CR43958	EXON	0	24	3	0	27	0	104	0	0	104	3	27	0	104	chr4_557702
chr4	557716	557716	16.1	16.1%_31r	chr4	557716	CR43958	EXON	0	26	5	0	31	0	89	0	1	90	5	31	0	90	chr4_557716
chr4	557717	557717	9.7	9.7%_31r	chr4	557717	CR43958	EXON	0	28	3	0	31	0	98	0	0	98	3	31	0	98	chr4_557717
chr4	557777	557777	33.3	33.3%_21r	chr4	557777	CR43958	EXON	0	14	7	0	21	0	114	0	0	114	7	21	0	114	chr4_557777
chr4	557788	557788	11.5	11.5%_26r	chr4	557788	CR43958	EXON	0	23	3	0	26	0	132	0	0	132	3	26	0	132	chr4_557788
chr4	557791	557791	7.7	7.7%_26r	chr4	557791	CR43958	EXON	0	24	2	0	26	0	119	0	0	119	2	26	0	119	chr4_557791
chr4	557797	557797	13.6	13.6%_22r	chr4	557797	CR43958	EXON	0	19	3	0	22	0	122	0	0	122	3	22	0	122	chr4_557797
chr4	1033042	1033042	7.5	7.5%_411r	chr4	1033042	ATPsyn-beta	EXON	378	2	0	31	411	963	0	4	0	967	31	411	0	967	chr4_1033042
chr4	1033064	1033064	29.9	29.9%_548r	chr4	1033064	ATPsyn-beta	EXON	384	0	0	164	548	1175	1	0	1	1177	164	548	1	1177	chr4_1033064
chr4	1033124	1033124	9.4	9.4%_447r	chr4	1033124	ATPsyn-beta	EXON	404	1	0	42	447	1311	1	2	0	1314	42	447	0	1314	chr4_1033124
chr4	1033141	1033141	9.7	9.7%_391r	chr4	1033141	ATPsyn-beta	EXON	351	2	0	38	391	1093	0	0	0	1093	38	391	0	1093	chr4_1033141
chr4	1033167	1033167	12.2	12.2%_477r	chr4	1033167	ATPsyn-beta	EXON	416	2	1	58	477	1218	0	0	0	1218	58	477	0	1218	chr4_1033167
chr4	1033311	1033311	8.4	8.4%_560r	chr4	1033311	ATPsyn-beta	EXON	512	0	1	47	560	1614	3	1	0	1618	47	560	0	1618	chr4_1033311
chr4	1033366	1033366	21.6	21.6%_421r	chr4	1033366	ATPsyn-beta	EXON	330	0	0	91	421	1129	2	1	1	1133	91	421	1	1133	chr4_1033366
chr4	1033592	1033592	8.6	8.6%_709r	chr4	1033592	ATPsyn-beta	EXON	646	1	1	61	709	2076	2	0	10	2088	61	709	10	2088	chr4_1033592
chr4	1033600	1033600	14.8	14.8%_741r	chr4	1033600	ATPsyn-beta	EXON	631	0	0	110	741	1988	0	0	0	1988	110	741	0	1988	chr4_1033600
chr4	1033764	1033764	13	13.0%_622r	chr4	1033764	ATPsyn-beta	EXON	539	2	0	81	622	1320	1	0	0	1321	81	622	0	1321	chr4_1033764
chr4	1033777	1033777	14.2	14.2%_801r	chr4	1033777	ATPsyn-beta	EXON	686	1	0	114	801	1408	1	1	0	1410	114	801	0	1410	chr4_1033777
chr4	1033877	1033877	9.8	9.8%_950r	chr4	1033877	ATPsyn-beta	EXON	855	1	1	93	950	2079	4	1	1	2085	93	950	1	2085	chr4_1033877
chr4	1033899	1033899	23.5	23.5%_1019r	chr4	1033899	ATPsyn-beta	EXON	780	0	0	239	1019	1970	2	2	0	1974	239	1019	0	1974	chr4_1033899
chr4	1034113	1034113	7.4	7.4%_651r	chr4	1034113	ATPsyn-beta	EXON	600	2	1	48	651	1753	0	0	0	1753	48	651	0	1753	chr4_1034113
chr4	1034173	1034173	8	8.0%_666r	chr4	1034173	ATPsyn-beta	EXON	612	1	0	53	666	1575	0	0	0	1575	53	666	0	1575	chr4_1034173
chr4	1034201	1034201	6.3	6.3%_522r	chr4	1034201	ATPsyn-beta	EXON	488	1	0	33	522	1085	0	2	1	1088	33	522	1	1088	chr4_1034201
chr4	1034202	1034202	8.7	8.7%_515r	chr4	1034202	ATPsyn-beta	EXON	470	0	0	45	515	1081	1	0	0	1082	45	515	0	1082	chr4_1034202
chr4	1034223	1034223	31.9	31.9%_502r	chr4	1034223	ATPsyn-beta	EXON	342	0	0	160	502	1096	0	0	0	1096	160	502	0	1096	chr4_1034223
chr4	1034232	1034232	29.5	29.5%_535r	chr4	1034232	ATPsyn-beta	EXON	375	2	0	158	535	1236	1	0	0	1237	158	535	0	1237	chr4_1034232
chr4	1034233	1034233	10.3	10.3%_543r	chr4	1034233	ATPsyn-beta	EXON	487	0	0	56	543	1219	2	0	0	1221	56	543	0	1221	chr4_1034233
chr4	1034322	1034322	40.9	40.9%_511r	chr4	1034322	ATPsyn-beta	EXON	302	0	0	209	511	1312	0	1	2	1315	209	511	2	1315	chr4_1034322
chr4	1034332	1034332	7.7	7.7%_609r	chr4	1034332	ATPsyn-beta	EXON	561	1	0	47	609	1389	1	1	0	1391	47	609	0	1391	chr4_1034332
chr4	1034338	1034338	10.8	10.8%_529r	chr4	1034338	ATPsyn-beta	EXON	470	1	1	57	529	1271	0	0	0	1271	57	529	0	1271	chr4_1034338
chr4	1034349	1034349	7.9	7.9%_629r	chr4	1034349	ATPsyn-beta	EXON	576	3	0	50	629	1269	1	0	0	1270	50	629	0	1270	chr4_1034349
chr4	1034400	1034400	10.5	10.5%_523r	chr4	1034400	ATPsyn-beta	EXON	468	0	0	55	523	1088	0	0	0	1088	55	523	0	1088	chr4_1034400
chr4	1034412	1034412	12.9	12.9%_559r	chr4	1034412	ATPsyn-beta	EXON	487	0	0	72	559	1206	0	0	0	1206	72	559	0	1206	chr4_1034412
chr4	1034416	1034416	36.8	36.8%_560r	chr4	1034416	ATPsyn-beta	EXON	354	0	0	206	560	1239	0	2	5	1246	206	560	5	1246	chr4_1034416
chr4	1034510	1034510	8.2	8.2%_170r	chr4	1034510	ATPsyn-beta	EXON	156	0	0	14	170	623	0	0	0	623	14	170	0	623	chr4_1034510
chr4	1034512	1034512	75.6	75.6%_164r	chr4	1034512	ATPsyn-beta	EXON	40	0	0	124	164	608	0	0	0	608	124	164	0	608	chr4_1034512
chr4	649853	649853	45	45.0%_20r	chr4	649853	gw	EXON	0	11	9	0	20	0	68	0	0	68	9	20	0	68	chr4_649853
chr4	650065	650065	26.9	26.9%_26r	chr4	650065	gw	EXON	0	19	7	0	26	1	89	0	0	90	7	26	0	90	chr4_650065
chr4	650071	650071	6.9	6.9%_29r	chr4	650071	gw	EXON	0	27	2	0	29	0	92	0	0	92	2	29	0	92	chr4_650071
chr4	650089	650089	32	32.0%_25r	chr4	650089	gw	EXON	0	17	8	0	25	0	93	0	0	93	8	25	0	93	chr4_650089
chr4	650142	650142	13.3	13.3%_30r	chr4	650142	gw	EXON	0	26	4	0	30	0	134	0	0	134	4	30	0	134	chr4_650142
chr4	650181	650181	9.5	9.5%_42r	chr4	650181	gw	EXON	0	38	4	0	42	0	131	0	0	131	4	42	0	131	chr4_650181
chr4	650199	650199	7.3	7.3%_41r	chr4	650199	gw	EXON	0	38	3	0	41	0	138	0	2	140	3	41	0	140	chr4_650199
chr4	650211	650211	17.1	17.1%_41r	chr4	650211	gw	EXON	0	34	7	0	41	0	119	0	0	119	7	41	0	119	chr4_650211
chr4	650216	650216	21.1	21.1%_38r	chr4	650216	gw	EXON	0	30	8	0	38	0	118	0	0	118	8	38	0	118	chr4_650216
chr4	650243	650243	15.4	15.4%_39r	chr4	650243	gw	EXON	0	33	6	0	39	0	104	0	0	104	6	39	0	104	chr4_650243
chr4	650249	650249	9.1	9.1%_33r	chr4	650249	gw	EXON	0	30	3	0	33	0	128	0	0	128	3	33	0	128	chr4_650249
chr4	650255	650255	23.3	23.3%_30r	chr4	650255	gw	EXON	0	23	7	0	30	0	126	0	0	126	7	30	0	126	chr4_650255
chr4	650258	650258	10.3	10.3%_29r	chr4	650258	gw	EXON	0	26	3	0	29	0	129	0	0	129	3	29	0	129	chr4_650258
chr4	650261	650261	9.4	9.4%_32r	chr4	650261	gw	EXON	0	29	3	0	32	0	135	0	0	135	3	32	0	135	chr4_650261
chr4	650276	650276	67.6	67.6%_37r	chr4	650276	gw	EXON	0	12	25	0	37	0	130	0	0	130	25	37	0	130	chr4_650276
chr4	650310	650310	7.3	7.3%_41r	chr4	650310	gw	EXON	0	38	3	0	41	0	83	0	0	83	3	41	0	83	chr4_650310
chr4	650322	650322	8.1	8.1%_37r	chr4	650322	gw	EXON	1	33	3	0	37	0	61	0	0	61	3	37	0	61	chr4_650322
chr4	650326	650326	6.8	6.8%_44r	chr4	650326	gw	EXON	0	41	3	0	44	0	76	0	0	76	3	44	0	76	chr4_650326
chr4	650352	650352	30.2	30.2%_43r	chr4	650352	gw	EXON	0	30	13	0	43	0	79	0	0	79	13	43	0	79	chr4_650352
chr4	650355	650355	24.4	24.4%_41r	chr4	650355	gw	EXON	0	30	10	1	41	0	98	0	0	98	10	41	0	98	chr4_650355
chr4	650356	650356	47.4	47.4%_38r	chr4	650356	gw	EXON	0	20	18	0	38	0	96	0	0	96	18	38	0	96	chr4_650356
chr4	650357	650357	31.6	31.6%_38r	chr4	650357	gw	EXON	0	26	12	0	38	0	92	0	0	92	12	38	0	92	chr4_650357
chr4	650400	650400	19.6	19.6%_51r	chr4	650400	gw	EXON	0	41	10	0	51	0	143	0	1	144	10	51	0	144	chr4_650400
chr4	650412	650412	19	19.0%_42r	chr4	650412	gw	EXON	0	34	8	0	42	0	114	0	0	114	8	42	0	114	chr4_650412
chr4	650416	650416	13.6	13.6%_44r	chr4	650416	gw	EXON	0	38	6	0	44	1	113	0	0	114	6	44	0	114	chr4_650416
chr4	650451	650451	9.7	9.7%_31r	chr4	650451	gw	EXON	0	28	3	0	31	0	122	0	0	122	3	31	0	122	chr4_650451
chr4	650457	650457	12.1	12.1%_33r	chr4	650457	gw	EXON	0	29	4	0	33	0	122	0	0	122	4	33	0	122	chr4_650457
chr4	650461	650461	6.7	6.7%_30r	chr4	650461	gw	EXON	0	28	2	0	30	0	109	0	0	109	2	30	0	109	chr4_650461
chr4	650496	650496	6.9	6.9%_29r	chr4	650496	gw	EXON	0	26	2	1	29	0	161	0	0	161	2	29	0	161	chr4_650496
chr4	650514	650514	15.6	15.6%_32r	chr4	650514	gw	EXON	0	27	5	0	32	0	173	0	0	173	5	32	0	173	chr4_650514
chr4	650520	650520	10.7	10.7%_28r	chr4	650520	gw	EXON	0	25	3	0	28	0	130	0	0	130	3	28	0	130	chr4_650520
chr4	650526	650526	62.1	62.1%_29r	chr4	650526	gw	EXON	0	11	18	0	29	0	127	0	0	127	18	29	0	127	chr4_650526
chr4	650643	650643	16.7	16.7%_24r	chr4	650643	gw	EXON	0	20	4	0	24	1	62	0	0	63	4	24	0	63	chr4_650643
chr4	650646	650646	9.1	9.1%_22r	chr4	650646	gw	EXON	0	20	2	0	22	0	56	0	0	56	2	22	0	56	chr4_650646
chr4	650690	650690	10.7	10.7%_28r	chr4	650690	gw	EXON	0	25	3	0	28	0	40	0	0	40	3	28	0	40	chr4_650690
chr4	650691	650691	7.1	7.1%_28r	chr4	650691	gw	EXON	0	26	2	0	28	0	39	0	0	39	2	28	0	39	chr4_650691
chr4	650699	650699	6.2	6.2%_32r	chr4	650699	gw	EXON	0	30	2	0	32	0	42	0	0	42	2	32	0	42	chr4_650699
chr4	650733	650733	6.1	6.1%_33r	chr4	650733	gw	EXON	0	31	2	0	33	0	87	0	0	87	2	33	0	87	chr4_650733
chr4	650778	650778	18.2	18.2%_44r	chr4	650778	gw	EXON	0	36	8	0	44	0	105	0	0	105	8	44	0	105	chr4_650778
chr4	650793	650793	40.6	40.6%_32r	chr4	650793	gw	EXON	0	19	13	0	32	2	91	0	0	93	13	32	0	93	chr4_650793
chr4	650815	650815	31	31.0%_29r	chr4	650815	gw	EXON	0	20	9	0	29	0	107	0	0	107	9	29	0	107	chr4_650815
chr4	650826	650826	12.8	12.8%_47r	chr4	650826	gw	EXON	0	41	6	0	47	0	144	0	0	144	6	47	0	144	chr4_650826
chr4	650850	650850	35.5	35.5%_31r	chr4	650850	gw	EXON	0	20	11	0	31	0	67	0	0	67	11	31	0	67	chr4_650850
chr4	650912	650912	9.1	9.1%_22r	chr4	650912	gw	EXON	0	20	2	0	22	0	77	0	0	77	2	22	0	77	chr4_650912
chr4	650916	650916	33.3	33.3%_21r	chr4	650916	gw	EXON	0	13	7	1	21	0	81	0	0	81	7	21	0	81	chr4_650916
chr4	650979	650979	13.3	13.3%_30r	chr4	650979	gw	EXON	0	26	4	0	30	0	113	0	0	113	4	30	0	113	chr4_650979
chr4	651018	651018	55.2	55.2%_29r	chr4	651018	gw	EXON	0	13	16	0	29	0	145	0	0	145	16	29	0	145	chr4_651018
chr4	652337	652337	8	8.0%_25r	chr4	652337	gw	EXON	0	23	2	0	25	0	73	0	0	73	2	25	0	73	chr4_652337
chr4	652362	652362	13.6	13.6%_22r	chr4	652362	gw	EXON	0	19	3	0	22	0	106	0	0	106	3	22	0	106	chr4_652362
chr4	652407	652407	6.5	6.5%_31r	chr4	652407	gw	EXON	0	29	2	0	31	0	99	0	0	99	2	31	0	99	chr4_652407
chr4	652425	652425	13.6	13.6%_22r	chr4	652425	gw	EXON	0	19	3	0	22	1	93	0	0	94	3	22	0	94	chr4_652425
chr4	652457	652457	27.8	27.8%_36r	chr4	652457	gw	EXON	0	26	10	0	36	0	82	0	0	82	10	36	0	82	chr4_652457
chr4	652540	652540	6.7	6.7%_30r	chr4	652540	gw	EXON	0	28	2	0	30	0	126	0	0	126	2	30	0	126	chr4_652540
chr4	652557	652557	7.7	7.7%_39r	chr4	652557	gw	EXON	0	36	3	0	39	0	149	0	0	149	3	39	0	149	chr4_652557
chr4	652565	652565	11.8	11.8%_34r	chr4	652565	gw	EXON	0	30	4	0	34	0	132	0	0	132	4	34	0	132	chr4_652565
chr4	652803	652803	9.5	9.5%_21r	chr4	652803	gw	EXON	1	18	2	0	21	1	135	0	0	136	2	21	0	136	chr4_652803
chr4	652809	652809	9.5	9.5%_21r	chr4	652809	gw	EXON	0	19	2	0	21	0	121	0	1	122	2	21	0	122	chr4_652809
chr4	652916	652916	7.7	7.7%_26r	chr4	652916	gw	EXON	0	23	2	1	26	0	96	0	0	96	2	26	0	96	chr4_652916
chr4	652928	652928	9.1	9.1%_33r	chr4	652928	gw	EXON	0	30	3	0	33	0	122	0	0	122	3	33	0	122	chr4_652928
chr4	652964	652964	7.7	7.7%_26r	chr4	652964	gw	EXON	0	24	2	0	26	0	121	0	0	121	2	26	0	121	chr4_652964
chr4	652968	652968	12	12.0%_25r	chr4	652968	gw	EXON	0	22	3	0	25	0	115	0	1	116	3	25	0	116	chr4_652968
chr4	652992	652992	11.8	11.8%_34r	chr4	652992	gw	EXON	0	30	4	0	34	0	117	0	0	117	4	34	0	117	chr4_652992
chr4	653904	653904	8	8.0%_25r	chr4	653904	gw	EXON	0	23	2	0	25	0	73	0	0	73	2	25	0	73	chr4_653904
chr4	653979	653979	46.7	46.7%_30r	chr4	653979	gw	EXON	0	16	14	0	30	0	107	0	0	107	14	30	0	107	chr4_653979
chr4	654006	654006	7.1	7.1%_28r	chr4	654006	gw	EXON	0	26	2	0	28	1	109	0	0	110	2	28	0	110	chr4_654006
chr4	654034	654034	7.7	7.7%_26r	chr4	654034	gw	EXON	1	23	2	0	26	0	151	0	0	151	2	26	0	151	chr4_654034
chr4	654506	654506	10	10.0%_20r	chr4	654506	gw	EXON	0	18	2	0	20	0	109	0	0	109	2	20	0	109	chr4_654506
chr4	654510	654510	13	13.0%_23r	chr4	654510	gw	EXON	0	20	3	0	23	0	135	0	0	135	3	23	0	135	chr4_654510
chr4	654531	654531	8.3	8.3%_24r	chr4	654531	gw	EXON	0	22	2	0	24	0	106	0	0	106	2	24	0	106	chr4_654531
chr4	654643	654643	13	13.0%_23r	chr4	654643	gw	EXON	1	18	3	1	23	0	84	0	0	84	3	23	0	84	chr4_654643
chr4	654661	654661	12	12.0%_25r	chr4	654661	gw	EXON	1	21	3	0	25	0	122	0	0	122	3	25	0	122	chr4_654661
chr4	654692	654692	10	10.0%_20r	chr4	654692	gw	EXON	0	18	2	0	20	0	98	0	0	98	2	20	0	98	chr4_654692
chr4	654697	654697	15	15.0%_20r	chr4	654697	gw	EXON	0	17	3	0	20	0	94	0	0	94	3	20	0	94	chr4_654697
chr4	654742	654742	8.7	8.7%_23r	chr4	654742	gw	EXON	0	21	2	0	23	0	86	0	0	86	2	23	0	86	chr4_654742
chr4	654753	654753	6.1	6.1%_33r	chr4	654753	gw	EXON	0	31	2	0	33	0	81	0	0	81	2	33	0	81	chr4_654753
chr4	655072	655072	9.5	9.5%_21r	chr4	655072	gw	EXON	0	19	2	0	21	0	92	0	0	92	2	21	0	92	chr4_655072
chr4	655093	655093	11.4	11.4%_35r	chr4	655093	gw	EXON	0	31	4	0	35	0	110	0	0	110	4	35	0	110	chr4_655093
chr4	655115	655115	7.7	7.7%_26r	chr4	655115	gw	EXON	0	24	2	0	26	0	98	0	0	98	2	26	0	98	chr4_655115
chr4	655132	655132	6.5	6.5%_31r	chr4	655132	gw	EXON	0	29	2	0	31	0	107	0	0	107	2	31	0	107	chr4_655132
chr4	655175	655175	10	10.0%_20r	chr4	655175	gw	EXON	0	18	2	0	20	0	41	0	0	41	2	20	0	41	chr4_655175
chr4	655250	655250	12.9	12.9%_31r	chr4	655250	gw	EXON	0	27	4	0	31	0	102	0	0	102	4	31	0	102	chr4_655250
chr4	655253	655253	6.5	6.5%_31r	chr4	655253	gw	EXON	0	29	2	0	31	0	97	0	0	97	2	31	0	97	chr4_655253
chr4	655269	655269	8.8	8.8%_34r	chr4	655269	gw	EXON	0	31	3	0	34	0	97	0	0	97	3	34	0	97	chr4_655269
chr4	655289	655289	9.7	9.7%_31r	chr4	655289	gw	EXON	0	28	3	0	31	0	73	0	0	73	3	31	0	73	chr4_655289
chr4	655310	655310	7.4	7.4%_27r	chr4	655310	gw	EXON	0	25	2	0	27	0	58	0	0	58	2	27	0	58	chr4_655310
chr4	655334	655334	12.5	12.5%_24r	chr4	655334	gw	EXON	0	21	3	0	24	0	77	0	0	77	3	24	0	77	chr4_655334
chr4	655340	655340	38.1	38.1%_21r	chr4	655340	gw	EXON	0	13	8	0	21	0	67	0	0	67	8	21	0	67	chr4_655340
chr4	655350	655350	7.7	7.7%_26r	chr4	655350	gw	EXON	0	24	2	0	26	0	79	0	0	79	2	26	0	79	chr4_655350
chr4	656245	656245	20.8	20.8%_24r	chr4	656245	gw	EXON	0	19	5	0	24	0	96	0	0	96	5	24	0	96	chr4_656245
chr4	656256	656256	32	32.0%_25r	chr4	656256	gw	EXON	0	17	8	0	25	0	86	0	0	86	8	25	0	86	chr4_656256
chr4	656293	656293	12.5	12.5%_24r	chr4	656293	gw	EXON	0	21	3	0	24	0	79	0	1	80	3	24	0	80	chr4_656293
chr4	656295	656295	9.5	9.5%_21r	chr4	656295	gw	EXON	0	19	2	0	21	0	67	0	0	67	2	21	0	67	chr4_656295
chr4	656358	656358	19.2	19.2%_26r	chr4	656358	gw	EXON	0	21	5	0	26	0	92	0	0	92	5	26	0	92	chr4_656358
chr4	656359	656359	20	20.0%_25r	chr4	656359	gw	EXON	0	20	5	0	25	0	88	0	1	89	5	25	0	89	chr4_656359
chr4	656408	656408	12.5	12.5%_32r	chr4	656408	gw	EXON	0	28	4	0	32	0	95	0	0	95	4	32	0	95	chr4_656408
chr4	656472	656472	10	10.0%_20r	chr4	656472	gw	EXON	0	18	2	0	20	1	87	0	0	88	2	20	0	88	chr4_656472
chr4	656476	656476	9.1	9.1%_22r	chr4	656476	gw	EXON	0	20	2	0	22	0	97	0	0	97	2	22	0	97	chr4_656476
chr4	656585	656585	12.5	12.5%_24r	chr4	656585	gw	EXON	0	21	3	0	24	0	101	0	0	101	3	24	0	101	chr4_656585
chr4	656640	656640	54.2	54.2%_24r	chr4	656640	gw	EXON	0	11	13	0	24	0	101	0	0	101	13	24	0	101	chr4_656640
chr4	656641	656641	12.5	12.5%_24r	chr4	656641	gw	EXON	0	21	3	0	24	1	91	0	0	92	3	24	0	92	chr4_656641
chr4	656674	656674	7.4	7.4%_27r	chr4	656674	gw	EXON	0	25	2	0	27	1	84	0	0	85	2	27	0	85	chr4_656674
chr4	656730	656730	20	20.0%_20r	chr4	656730	gw	EXON	0	16	4	0	20	0	52	0	0	52	4	20	0	52	chr4_656730
chr4	656748	656748	9.1	9.1%_22r	chr4	656748	gw	EXON	0	20	2	0	22	1	60	0	0	61	2	22	0	61	chr4_656748
chr4	656752	656752	9.1	9.1%_22r	chr4	656752	gw	EXON	0	20	2	0	22	0	68	0	1	69	2	22	0	69	chr4_656752
chr4	656767	656767	9.1	9.1%_22r	chr4	656767	gw	EXON	0	20	2	0	22	0	78	0	0	78	2	22	0	78	chr4_656767
chr4	656847	656847	20	20.0%_20r	chr4	656847	gw	EXON	0	16	4	0	20	0	87	0	0	87	4	20	0	87	chr4_656847
chr4	656956	656956	24	24.0%_25r	chr4	656956	gw	EXON	0	19	6	0	25	0	116	0	0	116	6	25	0	116	chr4_656956
chr4	656993	656993	54.2	54.2%_24r	chr4	656993	gw	EXON	0	11	13	0	24	0	79	0	0	79	13	24	0	79	chr4_656993
chr4	657028	657028	16	16.0%_25r	chr4	657028	gw	EXON	0	21	4	0	25	0	91	0	0	91	4	25	0	91	chr4_657028
chr4	657033	657033	14.3	14.3%_28r	chr4	657033	gw	EXON	0	24	4	0	28	0	90	0	0	90	4	28	0	90	chr4_657033
chr4	657047	657047	18.8	18.8%_32r	chr4	657047	gw	EXON	0	26	6	0	32	0	85	0	0	85	6	32	0	85	chr4_657047
chr4	657079	657079	18.2	18.2%_22r	chr4	657079	gw	EXON	0	18	4	0	22	0	75	0	0	75	4	22	0	75	chr4_657079
chr4	657102	657102	15	15.0%_20r	chr4	657102	gw	EXON	0	17	3	0	20	0	78	0	0	78	3	20	0	78	chr4_657102
chr4	657129	657129	33.3	33.3%_21r	chr4	657129	gw	EXON	0	14	7	0	21	0	101	0	0	101	7	21	0	101	chr4_657129
chr4	657133	657133	36	36.0%_25r	chr4	657133	gw	EXON	0	16	9	0	25	0	106	0	0	106	9	25	0	106	chr4_657133
chr4	657139	657139	12.1	12.1%_33r	chr4	657139	gw	EXON	0	29	4	0	33	0	102	0	0	102	4	33	0	102	chr4_657139
chr4	657142	657142	25	25.0%_32r	chr4	657142	gw	EXON	0	24	8	0	32	0	99	0	0	99	8	32	0	99	chr4_657142
chr4	657150	657150	9.1	9.1%_33r	chr4	657150	gw	EXON	0	30	3	0	33	0	97	0	0	97	3	33	0	97	chr4_657150
chr4	657158	657158	18.9	18.9%_37r	chr4	657158	gw	EXON	0	30	7	0	37	0	91	0	1	92	7	37	0	92	chr4_657158
chr4	657223	657223	9.8	9.8%_41r	chr4	657223	gw	EXON	0	37	4	0	41	0	97	0	0	97	4	41	0	97	chr4_657223
chr4	657231	657231	7.7	7.7%_39r	chr4	657231	gw	EXON	0	36	3	0	39	0	125	0	0	125	3	39	0	125	chr4_657231
chr4	657313	657313	63.3	63.3%_30r	chr4	657313	gw	EXON	0	11	19	0	30	0	81	0	0	81	19	30	0	81	chr4_657313
chr4	657322	657322	69.2	69.2%_26r	chr4	657322	gw	EXON	0	8	18	0	26	0	67	0	0	67	18	26	0	67	chr4_657322
chr4	657450	657450	11.1	11.1%_27r	chr4	657450	gw	EXON	0	24	3	0	27	0	72	0	0	72	3	27	0	72	chr4_657450
chr4	657494	657494	10	10.0%_20r	chr4	657494	gw	EXON	0	18	2	0	20	0	61	0	0	61	2	20	0	61	chr4_657494
chr4	657508	657508	12.5	12.5%_24r	chr4	657508	gw	EXON	0	21	3	0	24	0	42	0	0	42	3	24	0	42	chr4_657508
chr4	657509	657509	18.2	18.2%_22r	chr4	657509	gw	EXON	0	18	4	0	22	0	39	0	0	39	4	22	0	39	chr4_657509
chr4	657523	657523	8	8.0%_25r	chr4	657523	gw	EXON	0	23	2	0	25	0	37	0	0	37	2	25	0	37	chr4_657523
chr4	657534	657534	26.1	26.1%_23r	chr4	657534	gw	EXON	0	17	6	0	23	0	48	0	0	48	6	23	0	48	chr4_657534
chr4	657536	657536	8.7	8.7%_23r	chr4	657536	gw	EXON	0	21	2	0	23	0	48	0	0	48	2	23	0	48	chr4_657536
chr4	657550	657550	37.9	37.9%_29r	chr4	657550	gw	EXON	0	18	11	0	29	0	55	0	0	55	11	29	0	55	chr4_657550
chr4	657556	657556	6.7	6.7%_30r	chr4	657556	gw	EXON	0	28	2	0	30	0	76	0	0	76	2	30	0	76	chr4_657556
chr4	657596	657596	6.7	6.7%_30r	chr4	657596	gw	EXON	0	28	2	0	30	0	71	0	0	71	2	30	0	71	chr4_657596
chr4	657615	657615	8	8.0%_25r	chr4	657615	gw	EXON	0	23	2	0	25	0	85	0	0	85	2	25	0	85	chr4_657615
chr4	657619	657619	8.7	8.7%_23r	chr4	657619	gw	EXON	0	20	2	1	23	0	81	0	0	81	2	23	0	81	chr4_657619
chr4	658058	658058	11.4	11.4%_35r	chr4	658058	gw	EXON	0	31	4	0	35	0	125	0	0	125	4	35	0	125	chr4_658058
chr4	658091	658091	15.4	15.4%_26r	chr4	658091	gw	EXON	0	22	4	0	26	0	94	0	2	96	4	26	0	96	chr4_658091
chr4	658110	658110	15.4	15.4%_26r	chr4	658110	gw	EXON	0	22	4	0	26	0	85	0	0	85	4	26	0	85	chr4_658110
chr4	658202	658202	15	15.0%_20r	chr4	658202	gw	EXON	0	17	3	0	20	0	95	0	0	95	3	20	0	95	chr4_658202
chr4	658240	658240	10	10.0%_30r	chr4	658240	gw	EXON	1	26	3	0	30	0	75	0	0	75	3	30	0	75	chr4_658240
chr4	658241	658241	6.9	6.9%_29r	chr4	658241	gw	EXON	0	27	2	0	29	0	75	0	0	75	2	29	0	75	chr4_658241
chr4	658244	658244	6.9	6.9%_29r	chr4	658244	gw	EXON	0	27	2	0	29	0	67	0	0	67	2	29	0	67	chr4_658244
chr4	658248	658248	17.4	17.4%_23r	chr4	658248	gw	EXON	0	19	4	0	23	0	51	0	0	51	4	23	0	51	chr4_658248
chr4	1037199	1037199	10.7	10.7%_28r	chr4	1037199	CaMKII	EXON	0	25	3	0	28	1	106	0	0	107	3	28	0	107	chr4_1037199
chr4	1037221	1037221	12.5	12.5%_32r	chr4	1037221	CaMKII	EXON	0	28	4	0	32	0	140	0	0	140	4	32	0	140	chr4_1037221
chr4	1037227	1037227	8.6	8.6%_35r	chr4	1037227	CaMKII	EXON	0	32	3	0	35	0	136	0	0	136	3	35	0	136	chr4_1037227
chr4	1037254	1037254	6.8	6.8%_44r	chr4	1037254	CaMKII	EXON	0	41	3	0	44	0	180	0	1	181	3	44	0	181	chr4_1037254
chr4	1037255	1037255	15.9	15.9%_44r	chr4	1037255	CaMKII	EXON	0	37	7	0	44	1	173	0	0	174	7	44	0	174	chr4_1037255
chr4	1037257	1037257	29.7	29.7%_37r	chr4	1037257	CaMKII	EXON	0	26	11	0	37	0	178	0	0	178	11	37	0	178	chr4_1037257
chr4	1037264	1037264	7.3	7.3%_41r	chr4	1037264	CaMKII	EXON	0	38	3	0	41	0	186	0	0	186	3	41	0	186	chr4_1037264
chr4	1037272	1037272	6.1	6.1%_49r	chr4	1037272	CaMKII	EXON	0	46	3	0	49	0	193	0	0	193	3	49	0	193	chr4_1037272
chr4	1037359	1037359	53.3	53.3%_30r	chr4	1037359	CaMKII	EXON	0	14	16	0	30	0	80	0	0	80	16	30	0	80	chr4_1037359
chr4	1037360	1037360	22.6	22.6%_31r	chr4	1037360	CaMKII	EXON	0	24	7	0	31	0	85	0	0	85	7	31	0	85	chr4_1037360
chr4	1037364	1037364	21.4	21.4%_28r	chr4	1037364	CaMKII	EXON	0	22	6	0	28	0	98	0	0	98	6	28	0	98	chr4_1037364
chr4	1037372	1037372	7.4	7.4%_27r	chr4	1037372	CaMKII	EXON	0	25	2	0	27	0	95	0	0	95	2	27	0	95	chr4_1037372
chr4	1037406	1037406	7.3	7.3%_55r	chr4	1037406	CaMKII	EXON	0	51	4	0	55	0	185	0	1	186	4	55	0	186	chr4_1037406
chr4	1037420	1037420	8	8.0%_25r	chr4	1037420	CaMKII	EXON	0	23	2	0	25	0	186	0	0	186	2	25	0	186	chr4_1037420
chr4	1037476	1037476	32	32.0%_25r	chr4	1037476	CaMKII	EXON	0	17	8	0	25	1	182	0	0	183	8	25	0	183	chr4_1037476
chr4	1037477	1037477	11.1	11.1%_27r	chr4	1037477	CaMKII	EXON	0	24	3	0	27	0	193	0	0	193	3	27	0	193	chr4_1037477
chr4	1037485	1037485	7.5	7.5%_40r	chr4	1037485	CaMKII	EXON	0	37	3	0	40	0	244	0	0	244	3	40	0	244	chr4_1037485
chr4	1037503	1037503	15.9	15.9%_44r	chr4	1037503	CaMKII	EXON	0	37	7	0	44	0	226	0	0	226	7	44	0	226	chr4_1037503
chr4	1037510	1037510	7.3	7.3%_41r	chr4	1037510	CaMKII	EXON	1	37	3	0	41	0	183	0	0	183	3	41	0	183	chr4_1037510
chr4	1037523	1037523	19.4	19.4%_36r	chr4	1037523	CaMKII	EXON	0	29	7	0	36	0	186	0	0	186	7	36	0	186	chr4_1037523
chr4	1037532	1037532	12.5	12.5%_40r	chr4	1037532	CaMKII	EXON	0	35	5	0	40	0	173	0	0	173	5	40	0	173	chr4_1037532
chr4	1037548	1037548	10.3	10.3%_29r	chr4	1037548	CaMKII	EXON	0	26	3	0	29	0	170	0	0	170	3	29	0	170	chr4_1037548
chr4	1037571	1037571	43.5	43.5%_23r	chr4	1037571	CaMKII	EXON	0	13	10	0	23	0	113	0	0	113	10	23	0	113	chr4_1037571
chr4	1037572	1037572	12.5	12.5%_24r	chr4	1037572	CaMKII	EXON	0	21	3	0	24	0	114	0	0	114	3	24	0	114	chr4_1037572
chr4	1037648	1037648	7.7	7.7%_26r	chr4	1037648	CaMKII	EXON	0	24	2	0	26	0	71	0	0	71	2	26	0	71	chr4_1037648
chr4	1037690	1037690	16.2	16.2%_37r	chr4	1037690	CaMKII	EXON	0	31	6	0	37	0	142	0	0	142	6	37	0	142	chr4_1037690
chr4	1037718	1037718	13.5	13.5%_37r	chr4	1037718	CaMKII	EXON	0	32	5	0	37	0	104	0	0	104	5	37	0	104	chr4_1037718
chr4	1037719	1037719	10.8	10.8%_37r	chr4	1037719	CaMKII	EXON	0	32	4	1	37	0	108	0	0	108	4	37	0	108	chr4_1037719
chr4	1037736	1037736	9.4	9.4%_53r	chr4	1037736	CaMKII	EXON	0	48	5	0	53	0	124	0	0	124	5	53	0	124	chr4_1037736
chr4	1038381	1038381	13.3	13.3%_30r	chr4	1038381	CaMKII	EXON	0	26	4	0	30	0	135	0	0	135	4	30	0	135	chr4_1038381
chr4	1038384	1038384	9.1	9.1%_33r	chr4	1038384	CaMKII	EXON	0	30	3	0	33	0	149	0	0	149	3	33	0	149	chr4_1038384
chr4	1038418	1038418	9.5	9.5%_21r	chr4	1038418	CaMKII	EXON	0	19	2	0	21	0	143	0	0	143	2	21	0	143	chr4_1038418
chr4	1038420	1038420	42.9	42.9%_21r	chr4	1038420	CaMKII	EXON	0	12	9	0	21	0	142	0	0	142	9	21	0	142	chr4_1038420
chr4	1045157	1045157	19	19.0%_21r	chr4	1045157	CaMKII	EXON	0	17	4	0	21	0	138	0	0	138	4	21	0	138	chr4_1045157
chr4	1045159	1045159	9.1	9.1%_22r	chr4	1045159	CaMKII	EXON	0	20	2	0	22	0	130	0	0	130	2	22	0	130	chr4_1045159
chr4	1045180	1045180	13.6	13.6%_22r	chr4	1045180	CaMKII	EXON	0	19	3	0	22	0	141	0	0	141	3	22	0	141	chr4_1045180
chr4	1045206	1045206	9.5	9.5%_21r	chr4	1045206	CaMKII	EXON	0	19	2	0	21	0	145	0	0	145	2	21	0	145	chr4_1045206
chr4	1045246	1045246	9.1	9.1%_22r	chr4	1045246	CaMKII	EXON	1	19	2	0	22	0	106	0	0	106	2	22	0	106	chr4_1045246
chr4	1047272	1047272	8.7	8.7%_23r	chr4	1047272	CaMKII	EXON	0	21	2	0	23	0	125	0	0	125	2	23	0	125	chr4_1047272
chr4	1047276	1047276	13	13.0%_23r	chr4	1047276	CaMKII	EXON	0	20	3	0	23	0	114	0	0	114	3	23	0	114	chr4_1047276
chr4	1047327	1047327	8.1	8.1%_37r	chr4	1047327	CaMKII	EXON	0	34	3	0	37	0	169	0	0	169	3	37	0	169	chr4_1047327
chr4	1047331	1047331	36.6	36.6%_41r	chr4	1047331	CaMKII	EXON	0	26	15	0	41	0	151	0	0	151	15	41	0	151	chr4_1047331
chr4	1047336	1047336	43.5	43.5%_46r	chr4	1047336	CaMKII	EXON	0	26	20	0	46	0	150	0	0	150	20	46	0	150	chr4_1047336
chr4	1047346	1047346	6.7	6.7%_45r	chr4	1047346	CaMKII	EXON	0	42	3	0	45	0	148	0	0	148	3	45	0	148	chr4_1047346
chr4	1047471	1047471	25	25.0%_20r	chr4	1047471	CaMKII	EXON	0	15	5	0	20	0	129	0	0	129	5	20	0	129	chr4_1047471
chr4	1047520	1047520	9.5	9.5%_21r	chr4	1047520	CaMKII	EXON	0	19	2	0	21	0	136	0	0	136	2	21	0	136	chr4_1047520
chr4	1047540	1047540	22.7	22.7%_22r	chr4	1047540	CaMKII	EXON	0	17	5	0	22	0	150	0	0	150	5	22	0	150	chr4_1047540
chr4	1047541	1047541	18.2	18.2%_22r	chr4	1047541	CaMKII	EXON	0	18	4	0	22	0	147	0	1	148	4	22	0	148	chr4_1047541
chr4	1047543	1047543	8	8.0%_25r	chr4	1047543	CaMKII	EXON	0	23	2	0	25	0	153	0	0	153	2	25	0	153	chr4_1047543
chr4	1047663	1047663	28.1	28.1%_32r	chr4	1047663	CaMKII	EXON	0	23	9	0	32	0	159	0	0	159	9	32	0	159	chr4_1047663
chr4	1047675	1047675	8.8	8.8%_34r	chr4	1047675	CaMKII	EXON	0	31	3	0	34	0	165	0	0	165	3	34	0	165	chr4_1047675
chr4	1047713	1047713	24.2	24.2%_33r	chr4	1047713	CaMKII	EXON	0	25	8	0	33	0	195	0	0	195	8	33	0	195	chr4_1047713
chr4	1047827	1047827	10.8	10.8%_37r	chr4	1047827	CaMKII	EXON	0	33	4	0	37	0	194	0	0	194	4	37	0	194	chr4_1047827
chr4	1047839	1047839	12.5	12.5%_40r	chr4	1047839	CaMKII	EXON	0	35	5	0	40	0	229	1	0	230	5	40	1	230	chr4_1047839
chr4	1047869	1047869	22	22.0%_41r	chr4	1047869	CaMKII	EXON	0	32	9	0	41	0	215	0	1	216	9	41	0	216	chr4_1047869
chr4	1047895	1047895	40	40.0%_25r	chr4	1047895	CaMKII	EXON	0	15	10	0	25	0	139	0	0	139	10	25	0	139	chr4_1047895
chr4	1047929	1047929	45.5	45.5%_22r	chr4	1047929	CaMKII	EXON	0	12	10	0	22	1	107	0	0	108	10	22	0	108	chr4_1047929
chr4	1047944	1047944	6.1	6.1%_33r	chr4	1047944	CaMKII	EXON	0	31	2	0	33	0	124	0	0	124	2	33	0	124	chr4_1047944
chr4	1047968	1047968	11.5	11.5%_26r	chr4	1047968	CaMKII	EXON	0	23	3	0	26	0	171	0	0	171	3	26	0	171	chr4_1047968
chr4	1047971	1047971	13.8	13.8%_29r	chr4	1047971	CaMKII	EXON	0	25	4	0	29	1	175	0	0	176	4	29	0	176	chr4_1047971
chr4	1048023	1048023	11.8	11.8%_34r	chr4	1048023	CaMKII	EXON	0	30	4	0	34	0	204	0	0	204	4	34	0	204	chr4_1048023
chr4	1048066	1048066	6.2	6.2%_32r	chr4	1048066	CaMKII	EXON	0	30	2	0	32	0	199	0	0	199	2	32	0	199	chr4_1048066
chr4	1048070	1048070	15.6	15.6%_32r	chr4	1048070	CaMKII	EXON	0	27	5	0	32	0	209	0	0	209	5	32	0	209	chr4_1048070
chr4	1048082	1048082	48.4	48.4%_31r	chr4	1048082	CaMKII	EXON	0	16	15	0	31	1	213	0	0	214	15	31	0	214	chr4_1048082
chr4	1048094	1048094	25	25.0%_24r	chr4	1048094	CaMKII	EXON	0	18	6	0	24	0	144	0	0	144	6	24	0	144	chr4_1048094
chr4	1048124	1048124	30.8	30.8%_26r	chr4	1048124	CaMKII	EXON	0	18	8	0	26	0	85	0	0	85	8	26	0	85	chr4_1048124
chr4	1048133	1048133	18.5	18.5%_27r	chr4	1048133	CaMKII	EXON	0	22	5	0	27	0	88	0	0	88	5	27	0	88	chr4_1048133
chr4	1048144	1048144	25	25.0%_20r	chr4	1048144	CaMKII	EXON	0	15	5	0	20	0	145	0	0	145	5	20	0	145	chr4_1048144
chr4	1048145	1048145	10	10.0%_20r	chr4	1048145	CaMKII	EXON	0	18	2	0	20	0	149	0	0	149	2	20	0	149	chr4_1048145
chr4	1048544	1048544	12.5	12.5%_24r	chr4	1048544	CaMKII	EXON	0	21	3	0	24	0	250	0	0	250	3	24	0	250	chr4_1048544
chr4	1049220	1049220	13	13.0%_23r	chr4	1049220	CaMKII	EXON	0	20	3	0	23	0	137	0	0	137	3	23	0	137	chr4_1049220
chr4	1050341	1050341	6.5	6.5%_31r	chr4	1050341	CaMKII	EXON	0	29	2	0	31	0	76	0	0	76	2	31	0	76	chr4_1050341
chr4	1050469	1050469	7.5	7.5%_40r	chr4	1050469	CaMKII	EXON	0	37	3	0	40	0	113	0	0	113	3	40	0	113	chr4_1050469
chr4	1050479	1050479	12.9	12.9%_31r	chr4	1050479	CaMKII	EXON	0	27	4	0	31	0	106	0	0	106	4	31	0	106	chr4_1050479
chr4	1050544	1050544	10.7	10.7%_28r	chr4	1050544	CaMKII	EXON	0	25	3	0	28	0	117	0	0	117	3	28	0	117	chr4_1050544
chr4	1050553	1050553	8.3	8.3%_24r	chr4	1050553	CaMKII	EXON	0	22	2	0	24	0	122	0	0	122	2	24	0	122	chr4_1050553
chr4	1050567	1050567	9.5	9.5%_21r	chr4	1050567	CaMKII	EXON	0	19	2	0	21	0	94	0	0	94	2	21	0	94	chr4_1050567
chr4	1050757	1050757	22.2	22.2%_27r	chr4	1050757	CaMKII	EXON	0	21	6	0	27	0	102	0	0	102	6	27	0	102	chr4_1050757
chr4	1050791	1050791	35.7	35.7%_28r	chr4	1050791	CaMKII	EXON	0	18	10	0	28	0	106	0	0	106	10	28	0	106	chr4_1050791
chr4	1050841	1050841	16.7	16.7%_30r	chr4	1050841	CaMKII	EXON	0	25	5	0	30	0	107	0	0	107	5	30	0	107	chr4_1050841
chr4	1050851	1050851	19.2	19.2%_26r	chr4	1050851	CaMKII	EXON	0	21	5	0	26	0	124	0	0	124	5	26	0	124	chr4_1050851
chr4	1050859	1050859	8.3	8.3%_24r	chr4	1050859	CaMKII	EXON	0	22	2	0	24	0	114	0	0	114	2	24	0	114	chr4_1050859
chr4	1050864	1050864	18.2	18.2%_33r	chr4	1050864	CaMKII	EXON	0	27	6	0	33	0	117	0	0	117	6	33	0	117	chr4_1050864
chr4	1050909	1050909	6.7	6.7%_30r	chr4	1050909	CaMKII	EXON	0	28	2	0	30	0	95	0	0	95	2	30	0	95	chr4_1050909
chr4	1050920	1050920	6.5	6.5%_31r	chr4	1050920	CaMKII	EXON	0	29	2	0	31	0	82	0	0	82	2	31	0	82	chr4_1050920
chr4	1050936	1050936	8.7	8.7%_23r	chr4	1050936	CaMKII	EXON	0	21	2	0	23	0	86	0	0	86	2	23	0	86	chr4_1050936
chr4	1051013	1051013	7.7	7.7%_39r	chr4	1051013	CaMKII	EXON	0	36	3	0	39	0	111	0	0	111	3	39	0	111	chr4_1051013
chr4	1051014	1051014	8.3	8.3%_36r	chr4	1051014	CaMKII	EXON	0	33	3	0	36	0	102	0	0	102	3	36	0	102	chr4_1051014
chr4	1051021	1051021	24.1	24.1%_29r	chr4	1051021	CaMKII	EXON	0	22	7	0	29	0	98	0	0	98	7	29	0	98	chr4_1051021
chr4	1051030	1051030	30.4	30.4%_23r	chr4	1051030	CaMKII	EXON	0	16	7	0	23	0	94	0	0	94	7	23	0	94	chr4_1051030
chr4	1051050	1051050	25.9	25.9%_27r	chr4	1051050	CaMKII	EXON	0	20	7	0	27	0	114	0	0	114	7	27	0	114	chr4_1051050
chr4	1013649	1013649	8	8.0%_25r	chr4	1013649	PlexA	EXON	0	22	2	1	25	0	23	0	0	23	2	25	0	23	chr4_1013649
chr4	1013654	1013654	12.2	12.2%_41r	chr4	1013654	PlexA	EXON	0	36	5	0	41	0	35	0	1	36	5	41	0	36	chr4_1013654
chr4	1013695	1013695	9.5	9.5%_63r	chr4	1013695	PlexA	EXON	0	57	6	0	63	0	76	0	0	76	6	63	0	76	chr4_1013695
chr4	1013723	1013723	13	13.0%_46r	chr4	1013723	PlexA	EXON	0	40	6	0	46	1	130	0	0	131	6	46	0	131	chr4_1013723
chr4	1013734	1013734	14.3	14.3%_49r	chr4	1013734	PlexA	EXON	0	42	7	0	49	0	124	0	0	124	7	49	0	124	chr4_1013734
chr4	1013741	1013741	25	25.0%_60r	chr4	1013741	PlexA	EXON	0	45	15	0	60	0	128	0	0	128	15	60	0	128	chr4_1013741
chr4	1013753	1013753	17	17.0%_47r	chr4	1013753	PlexA	EXON	0	39	8	0	47	0	93	0	0	93	8	47	0	93	chr4_1013753
chr4	1013758	1013758	48.8	48.8%_41r	chr4	1013758	PlexA	EXON	0	21	20	0	41	0	91	0	0	91	20	41	0	91	chr4_1013758
chr4	1014331	1014331	31.1	31.1%_45r	chr4	1014331	PlexA	EXON	1	30	14	0	45	0	92	0	0	92	14	45	0	92	chr4_1014331
chr4	1014339	1014339	6.8	6.8%_59r	chr4	1014339	PlexA	EXON	0	55	4	0	59	0	83	0	0	83	4	59	0	83	chr4_1014339
chr4	1014359	1014359	36	36.0%_50r	chr4	1014359	PlexA	EXON	0	32	18	0	50	0	113	0	0	113	18	50	0	113	chr4_1014359
chr4	1014360	1014360	26	26.0%_50r	chr4	1014360	PlexA	EXON	0	37	13	0	50	0	113	0	0	113	13	50	0	113	chr4_1014360
chr4	1014379	1014379	9.6	9.6%_73r	chr4	1014379	PlexA	EXON	0	66	7	0	73	1	112	0	0	113	7	73	0	113	chr4_1014379
chr4	1014386	1014386	10	10.0%_60r	chr4	1014386	PlexA	EXON	1	53	6	0	60	0	82	0	0	82	6	60	0	82	chr4_1014386
chr4	1014397	1014397	14.5	14.5%_69r	chr4	1014397	PlexA	EXON	0	59	10	0	69	0	60	0	0	60	10	69	0	60	chr4_1014397
chr4	1014411	1014411	9	9.0%_67r	chr4	1014411	PlexA	EXON	0	61	6	0	67	0	54	0	0	54	6	67	0	54	chr4_1014411
chr4	1014414	1014414	17.6	17.6%_68r	chr4	1014414	PlexA	EXON	0	56	12	0	68	0	57	0	0	57	12	68	0	57	chr4_1014414
chr4	1014416	1014416	10.6	10.6%_66r	chr4	1014416	PlexA	EXON	0	59	7	0	66	0	61	0	0	61	7	66	0	61	chr4_1014416
chr4	1014434	1014434	16.7	16.7%_84r	chr4	1014434	PlexA	EXON	0	70	14	0	84	0	92	0	0	92	14	84	0	92	chr4_1014434
chr4	1014459	1014459	10.5	10.5%_86r	chr4	1014459	PlexA	EXON	0	77	9	0	86	0	155	0	0	155	9	86	0	155	chr4_1014459
chr4	1014474	1014474	13.1	13.1%_84r	chr4	1014474	PlexA	EXON	0	73	11	0	84	0	213	0	0	213	11	84	0	213	chr4_1014474
chr4	1014482	1014482	19.6	19.6%_97r	chr4	1014482	PlexA	EXON	0	78	19	0	97	0	208	0	0	208	19	97	0	208	chr4_1014482
chr4	1014505	1014505	6.9	6.9%_58r	chr4	1014505	PlexA	EXON	0	54	4	0	58	0	145	0	0	145	4	58	0	145	chr4_1014505
chr4	1014507	1014507	18.5	18.5%_54r	chr4	1014507	PlexA	EXON	0	44	10	0	54	0	139	0	0	139	10	54	0	139	chr4_1014507
chr4	1014508	1014508	12.9	12.9%_62r	chr4	1014508	PlexA	EXON	0	54	8	0	62	1	139	0	0	140	8	62	0	140	chr4_1014508
chr4	1014517	1014517	7.2	7.2%_69r	chr4	1014517	PlexA	EXON	0	64	5	0	69	0	142	0	0	142	5	69	0	142	chr4_1014517
chr4	1014585	1014585	41.3	41.3%_46r	chr4	1014585	PlexA	EXON	0	27	19	0	46	0	95	0	0	95	19	46	0	95	chr4_1014585
chr4	1014586	1014586	15.6	15.6%_45r	chr4	1014586	PlexA	EXON	0	38	7	0	45	0	93	0	0	93	7	45	0	93	chr4_1014586
chr4	1014592	1014592	13.9	13.9%_36r	chr4	1014592	PlexA	EXON	0	31	5	0	36	0	88	0	0	88	5	36	0	88	chr4_1014592
chr4	1014603	1014603	38.6	38.6%_44r	chr4	1014603	PlexA	EXON	0	27	17	0	44	0	82	0	0	82	17	44	0	82	chr4_1014603
chr4	1014617	1014617	10.2	10.2%_49r	chr4	1014617	PlexA	EXON	0	44	5	0	49	0	101	0	0	101	5	49	0	101	chr4_1014617
chr4	1014622	1014622	22.6	22.6%_53r	chr4	1014622	PlexA	EXON	0	41	12	0	53	0	109	0	0	109	12	53	0	109	chr4_1014622
chr4	1014651	1014651	7.8	7.8%_90r	chr4	1014651	PlexA	EXON	0	83	7	0	90	0	186	0	0	186	7	90	0	186	chr4_1014651
chr4	1014664	1014664	26.7	26.7%_45r	chr4	1014664	PlexA	EXON	0	33	12	0	45	0	139	0	0	139	12	45	0	139	chr4_1014664
chr4	1014673	1014673	7.5	7.5%_40r	chr4	1014673	PlexA	EXON	0	37	3	0	40	0	149	0	0	149	3	40	0	149	chr4_1014673
chr4	1014707	1014707	30.8	30.8%_26r	chr4	1014707	PlexA	EXON	0	18	8	0	26	0	82	0	0	82	8	26	0	82	chr4_1014707
chr4	1014857	1014857	19.2	19.2%_26r	chr4	1014857	PlexA	EXON	0	21	5	0	26	0	81	0	0	81	5	26	0	81	chr4_1014857
chr4	1014974	1014974	32	32.0%_25r	chr4	1014974	PlexA	EXON	0	17	8	0	25	0	104	0	0	104	8	25	0	104	chr4_1014974
chr4	1014979	1014979	28.6	28.6%_21r	chr4	1014979	PlexA	EXON	0	15	6	0	21	0	106	0	0	106	6	21	0	106	chr4_1014979
chr4	1014981	1014981	9.5	9.5%_21r	chr4	1014981	PlexA	EXON	0	19	2	0	21	0	102	0	0	102	2	21	0	102	chr4_1014981
chr4	1014985	1014985	22.7	22.7%_22r	chr4	1014985	PlexA	EXON	0	17	5	0	22	0	105	0	0	105	5	22	0	105	chr4_1014985
chr4	1015004	1015004	26.9	26.9%_26r	chr4	1015004	PlexA	EXON	0	19	7	0	26	0	125	0	0	125	7	26	0	125	chr4_1015004
chr4	1015015	1015015	48.5	48.5%_33r	chr4	1015015	PlexA	EXON	0	17	16	0	33	0	140	0	0	140	16	33	0	140	chr4_1015015
chr4	1015018	1015018	50	50.0%_34r	chr4	1015018	PlexA	EXON	0	17	17	0	34	0	140	0	0	140	17	34	0	140	chr4_1015018
chr4	1015023	1015023	18.5	18.5%_27r	chr4	1015023	PlexA	EXON	0	22	5	0	27	0	99	0	0	99	5	27	0	99	chr4_1015023
chr4	1015034	1015034	14.8	14.8%_27r	chr4	1015034	PlexA	EXON	0	23	4	0	27	0	99	0	0	99	4	27	0	99	chr4_1015034
chr4	1015059	1015059	8.3	8.3%_36r	chr4	1015059	PlexA	EXON	0	33	3	0	36	0	135	0	0	135	3	36	0	135	chr4_1015059
chr4	1015073	1015073	8	8.0%_25r	chr4	1015073	PlexA	EXON	0	23	2	0	25	0	112	0	0	112	2	25	0	112	chr4_1015073
chr4	1015079	1015079	22.7	22.7%_22r	chr4	1015079	PlexA	EXON	0	17	5	0	22	0	95	0	0	95	5	22	0	95	chr4_1015079
chr4	1015208	1015208	13	13.0%_23r	chr4	1015208	PlexA	EXON	0	20	3	0	23	1	77	0	0	78	3	23	0	78	chr4_1015208
chr4	1015241	1015241	24.2	24.2%_33r	chr4	1015241	PlexA	EXON	0	25	8	0	33	0	100	0	0	100	8	33	0	100	chr4_1015241
chr4	1015251	1015251	16.7	16.7%_30r	chr4	1015251	PlexA	EXON	1	24	5	0	30	0	90	0	0	90	5	30	0	90	chr4_1015251
chr4	1015291	1015291	65.2	65.2%_23r	chr4	1015291	PlexA	EXON	0	8	15	0	23	0	85	0	0	85	15	23	0	85	chr4_1015291
chr4	1015292	1015292	17.4	17.4%_23r	chr4	1015292	PlexA	EXON	0	19	4	0	23	0	87	0	0	87	4	23	0	87	chr4_1015292
chr4	1015303	1015303	23.8	23.8%_21r	chr4	1015303	PlexA	EXON	0	16	5	0	21	0	92	0	0	92	5	21	0	92	chr4_1015303
chr4	1015309	1015309	7.4	7.4%_27r	chr4	1015309	PlexA	EXON	0	24	2	1	27	0	94	0	0	94	2	27	0	94	chr4_1015309
chr4	1015336	1015336	8.3	8.3%_24r	chr4	1015336	PlexA	EXON	0	22	2	0	24	0	84	0	0	84	2	24	0	84	chr4_1015336
chr4	1015465	1015465	7.7	7.7%_26r	chr4	1015465	PlexA	EXON	0	24	2	0	26	0	58	0	0	58	2	26	0	58	chr4_1015465
chr4	1015477	1015477	30	30.0%_20r	chr4	1015477	PlexA	EXON	0	14	6	0	20	0	63	0	0	63	6	20	0	63	chr4_1015477
chr4	1015487	1015487	68	68.0%_25r	chr4	1015487	PlexA	EXON	0	8	17	0	25	1	81	0	0	82	17	25	0	82	chr4_1015487
chr4	1015495	1015495	7.1	7.1%_28r	chr4	1015495	PlexA	EXON	0	26	2	0	28	0	88	0	0	88	2	28	0	88	chr4_1015495
chr4	1015524	1015524	48.1	48.1%_27r	chr4	1015524	PlexA	EXON	0	14	13	0	27	0	76	0	1	77	13	27	0	77	chr4_1015524
chr4	1015527	1015527	18.2	18.2%_22r	chr4	1015527	PlexA	EXON	0	18	4	0	22	0	73	0	0	73	4	22	0	73	chr4_1015527
chr4	1016635	1016635	32	32.0%_25r	chr4	1016635	PlexA	EXON	0	17	8	0	25	0	54	0	0	54	8	25	0	54	chr4_1016635
chr4	1016657	1016657	40.9	40.9%_22r	chr4	1016657	PlexA	EXON	0	13	9	0	22	0	56	0	0	56	9	22	0	56	chr4_1016657
chr4	1016662	1016662	8	8.0%_25r	chr4	1016662	PlexA	EXON	0	23	2	0	25	0	55	0	0	55	2	25	0	55	chr4_1016662
chr4	1016671	1016671	16.7	16.7%_24r	chr4	1016671	PlexA	EXON	0	20	4	0	24	0	53	0	0	53	4	24	0	53	chr4_1016671
chr4	1017070	1017070	13.6	13.6%_22r	chr4	1017070	PlexA	EXON	0	19	3	0	22	0	74	0	0	74	3	22	0	74	chr4_1017070
chr4	1017090	1017090	10	10.0%_20r	chr4	1017090	PlexA	EXON	0	18	2	0	20	0	57	0	0	57	2	20	0	57	chr4_1017090
chr4	1017092	1017092	19	19.0%_21r	chr4	1017092	PlexA	EXON	0	17	4	0	21	0	55	0	0	55	4	21	0	55	chr4_1017092
chr4	1017686	1017686	10	10.0%_20r	chr4	1017686	PlexA	EXON	0	18	2	0	20	0	21	0	0	21	2	20	0	21	chr4_1017686
chr4	1017893	1017893	45.5	45.5%_22r	chr4	1017893	PlexA	EXON	0	12	10	0	22	0	65	0	0	65	10	22	0	65	chr4_1017893
chr4	1017916	1017916	38.1	38.1%_21r	chr4	1017916	PlexA	EXON	0	13	8	0	21	0	34	0	0	34	8	21	0	34	chr4_1017916
chr4	1017972	1017972	8.3	8.3%_24r	chr4	1017972	PlexA	EXON	0	22	2	0	24	0	38	0	0	38	2	24	0	38	chr4_1017972
chr4	1018071	1018071	7.1	7.1%_28r	chr4	1018071	PlexA	EXON	0	26	2	0	28	0	63	0	0	63	2	28	0	63	chr4_1018071
chr4	1018157	1018157	11.1	11.1%_36r	chr4	1018157	PlexA	EXON	0	32	4	0	36	0	59	0	0	59	4	36	0	59	chr4_1018157
chr4	1018185	1018185	16	16.0%_25r	chr4	1018185	PlexA	EXON	0	21	4	0	25	0	43	0	0	43	4	25	0	43	chr4_1018185
chr4	1018194	1018194	7.4	7.4%_27r	chr4	1018194	PlexA	EXON	0	25	2	0	27	0	50	0	0	50	2	27	0	50	chr4_1018194
chr4	1018314	1018314	8.3	8.3%_24r	chr4	1018314	PlexA	EXON	0	22	2	0	24	0	71	0	0	71	2	24	0	71	chr4_1018314
chr4	1018316	1018316	12.5	12.5%_24r	chr4	1018316	PlexA	EXON	0	21	3	0	24	0	74	0	0	74	3	24	0	74	chr4_1018316
chr4	1018326	1018326	11.1	11.1%_27r	chr4	1018326	PlexA	EXON	0	24	3	0	27	0	90	0	0	90	3	27	0	90	chr4_1018326
chr4	1018334	1018334	10	10.0%_20r	chr4	1018334	PlexA	EXON	0	18	2	0	20	1	83	0	0	84	2	20	0	84	chr4_1018334
chr4	1018336	1018336	15	15.0%_20r	chr4	1018336	PlexA	EXON	0	17	3	0	20	0	83	0	0	83	3	20	0	83	chr4_1018336
chr4	1018477	1018477	9.1	9.1%_22r	chr4	1018477	PlexA	EXON	0	20	2	0	22	0	58	0	0	58	2	22	0	58	chr4_1018477
chr4	1018617	1018617	14.8	14.8%_27r	chr4	1018617	PlexA	EXON	0	23	4	0	27	0	56	0	0	56	4	27	0	56	chr4_1018617
chr4	1018646	1018646	8	8.0%_25r	chr4	1018646	PlexA	EXON	0	23	2	0	25	0	34	0	0	34	2	25	0	34	chr4_1018646
chr4	1018647	1018647	34.6	34.6%_26r	chr4	1018647	PlexA	EXON	0	17	9	0	26	0	43	0	0	43	9	26	0	43	chr4_1018647
chr4	1018648	1018648	7.7	7.7%_26r	chr4	1018648	PlexA	EXON	0	24	2	0	26	0	42	0	0	42	2	26	0	42	chr4_1018648
chr4	1018649	1018649	8	8.0%_25r	chr4	1018649	PlexA	EXON	0	23	2	0	25	0	42	0	0	42	2	25	0	42	chr4_1018649
chr4	1018668	1018668	6.5	6.5%_31r	chr4	1018668	PlexA	EXON	0	29	2	0	31	0	78	0	0	78	2	31	0	78	chr4_1018668
chr4	1018776	1018776	6.2	6.2%_32r	chr4	1018776	PlexA	EXON	0	30	2	0	32	0	83	0	0	83	2	32	0	83	chr4_1018776
chr4	1018838	1018838	15	15.0%_20r	chr4	1018838	PlexA	EXON	0	17	3	0	20	0	43	0	0	43	3	20	0	43	chr4_1018838
chr4	1018848	1018848	11.5	11.5%_26r	chr4	1018848	PlexA	EXON	0	23	3	0	26	0	65	0	0	65	3	26	0	65	chr4_1018848
chr4	1019211	1019211	18.2	18.2%_22r	chr4	1019211	PlexA	EXON	0	18	4	0	22	0	84	0	0	84	4	22	0	84	chr4_1019211
chr4	1019669	1019669	51.9	51.9%_27r	chr4	1019669	PlexA	EXON	0	13	14	0	27	0	63	0	0	63	14	27	0	63	chr4_1019669
chr4	1019691	1019691	44.4	44.4%_27r	chr4	1019691	PlexA	EXON	0	15	12	0	27	0	46	0	0	46	12	27	0	46	chr4_1019691
chr4	1019696	1019696	19.2	19.2%_26r	chr4	1019696	PlexA	EXON	0	21	5	0	26	0	43	0	0	43	5	26	0	43	chr4_1019696
chr4	1019738	1019738	12	12.0%_25r	chr4	1019738	PlexA	EXON	0	22	3	0	25	0	83	0	0	83	3	25	0	83	chr4_1019738
chr4	1019750	1019750	8.3	8.3%_24r	chr4	1019750	PlexA	EXON	0	22	2	0	24	0	71	0	0	71	2	24	0	71	chr4_1019750
chr4	1019763	1019763	8	8.0%_25r	chr4	1019763	PlexA	EXON	0	23	2	0	25	0	74	0	0	74	2	25	0	74	chr4_1019763
chr4	1019874	1019874	8.3	8.3%_24r	chr4	1019874	PlexA	EXON	0	22	2	0	24	0	63	0	0	63	2	24	0	63	chr4_1019874
chr4	1019883	1019883	18.2	18.2%_22r	chr4	1019883	PlexA	EXON	0	18	4	0	22	0	57	0	0	57	4	22	0	57	chr4_1019883
chr4	1019889	1019889	25	25.0%_24r	chr4	1019889	PlexA	EXON	0	18	6	0	24	0	51	0	0	51	6	24	0	51	chr4_1019889
chr4	1019908	1019908	9.5	9.5%_21r	chr4	1019908	PlexA	EXON	0	19	2	0	21	0	58	0	0	58	2	21	0	58	chr4_1019908
chr4	1019912	1019912	18.2	18.2%_22r	chr4	1019912	PlexA	EXON	0	18	4	0	22	0	59	0	0	59	4	22	0	59	chr4_1019912
chr4	1019919	1019919	7.7	7.7%_26r	chr4	1019919	PlexA	EXON	0	24	2	0	26	0	72	0	0	72	2	26	0	72	chr4_1019919
chr4	1019925	1019925	20	20.0%_25r	chr4	1019925	PlexA	EXON	0	20	5	0	25	0	57	0	2	59	5	25	0	59	chr4_1019925
chr4	1019973	1019973	28	28.0%_25r	chr4	1019973	PlexA	EXON	0	18	7	0	25	0	82	0	0	82	7	25	0	82	chr4_1019973
chr4	1019974	1019974	11.5	11.5%_26r	chr4	1019974	PlexA	EXON	0	23	3	0	26	0	81	0	0	81	3	26	0	81	chr4_1019974
chr4	1019993	1019993	7.1	7.1%_28r	chr4	1019993	PlexA	EXON	0	26	2	0	28	0	76	0	0	76	2	28	0	76	chr4_1019993
chr4	1020003	1020003	10	10.0%_40r	chr4	1020003	PlexA	EXON	0	36	4	0	40	0	89	0	0	89	4	40	0	89	chr4_1020003
chr4	1022245	1022245	22.9	22.9%_35r	chr4	1022245	PlexA	EXON	0	27	8	0	35	0	95	0	0	95	8	35	0	95	chr4_1022245
chr4	1022300	1022300	7.1	7.1%_28r	chr4	1022300	PlexA	EXON	0	26	2	0	28	0	77	0	0	77	2	28	0	77	chr4_1022300
chr4	1022313	1022313	6.5	6.5%_31r	chr4	1022313	PlexA	EXON	0	29	2	0	31	0	94	0	0	94	2	31	0	94	chr4_1022313
chr4	1022319	1022319	6.1	6.1%_33r	chr4	1022319	PlexA	EXON	0	31	2	0	33	0	70	0	0	70	2	33	0	70	chr4_1022319
chr4	1022325	1022325	8.8	8.8%_34r	chr4	1022325	PlexA	EXON	0	31	3	0	34	0	84	0	0	84	3	34	0	84	chr4_1022325
chr4	1022330	1022330	16.7	16.7%_30r	chr4	1022330	PlexA	EXON	0	25	5	0	30	0	86	0	0	86	5	30	0	86	chr4_1022330
chr4	1022344	1022344	6.5	6.5%_31r	chr4	1022344	PlexA	EXON	0	29	2	0	31	0	90	0	0	90	2	31	0	90	chr4_1022344
chr4	1022347	1022347	16.1	16.1%_31r	chr4	1022347	PlexA	EXON	0	26	5	0	31	0	87	0	0	87	5	31	0	87	chr4_1022347
chr4	1022354	1022354	25.8	25.8%_31r	chr4	1022354	PlexA	EXON	0	23	8	0	31	1	126	0	0	127	8	31	0	127	chr4_1022354
chr4	1022375	1022375	9.1	9.1%_33r	chr4	1022375	PlexA	EXON	0	30	3	0	33	0	107	0	0	107	3	33	0	107	chr4_1022375
chr4	1022379	1022379	6.2	6.2%_32r	chr4	1022379	PlexA	EXON	0	30	2	0	32	0	97	0	0	97	2	32	0	97	chr4_1022379
chr4	1022385	1022385	16.7	16.7%_30r	chr4	1022385	PlexA	EXON	0	25	5	0	30	0	114	0	0	114	5	30	0	114	chr4_1022385
chr4	1022392	1022392	14.7	14.7%_34r	chr4	1022392	PlexA	EXON	0	29	5	0	34	1	91	0	0	92	5	34	0	92	chr4_1022392
chr4	1022398	1022398	13.3	13.3%_30r	chr4	1022398	PlexA	EXON	0	26	4	0	30	1	99	0	0	100	4	30	0	100	chr4_1022398
chr4	1022400	1022400	13.8	13.8%_29r	chr4	1022400	PlexA	EXON	0	25	4	0	29	0	102	0	0	102	4	29	0	102	chr4_1022400
chr4	1022428	1022428	13.2	13.2%_53r	chr4	1022428	PlexA	EXON	0	46	7	0	53	0	112	0	0	112	7	53	0	112	chr4_1022428
chr4	1022443	1022443	23.1	23.1%_52r	chr4	1022443	PlexA	EXON	0	40	12	0	52	0	118	0	0	118	12	52	0	118	chr4_1022443
chr4	1022489	1022489	8.6	8.6%_35r	chr4	1022489	PlexA	EXON	0	32	3	0	35	0	59	0	0	59	3	35	0	59	chr4_1022489
chr4	1022498	1022498	34.4	34.4%_32r	chr4	1022498	PlexA	EXON	0	21	11	0	32	0	63	0	0	63	11	32	0	63	chr4_1022498
chr4	1022499	1022499	6.1	6.1%_33r	chr4	1022499	PlexA	EXON	0	31	2	0	33	0	60	0	0	60	2	33	0	60	chr4_1022499
chr4	1022504	1022504	10.3	10.3%_29r	chr4	1022504	PlexA	EXON	0	26	3	0	29	0	61	0	0	61	3	29	0	61	chr4_1022504
chr4	1022505	1022505	72.4	72.4%_29r	chr4	1022505	PlexA	EXON	0	8	21	0	29	0	61	0	0	61	21	29	0	61	chr4_1022505
chr4	1022515	1022515	22.2	22.2%_27r	chr4	1022515	PlexA	EXON	0	21	6	0	27	0	110	0	0	110	6	27	0	110	chr4_1022515
chr4	1022516	1022516	7.4	7.4%_27r	chr4	1022516	PlexA	EXON	0	25	2	0	27	0	110	0	0	110	2	27	0	110	chr4_1022516
chr4	1022526	1022526	6.5	6.5%_46r	chr4	1022526	PlexA	EXON	0	43	3	0	46	0	161	0	0	161	3	46	0	161	chr4_1022526
chr4	1022564	1022564	11.4	11.4%_35r	chr4	1022564	PlexA	EXON	0	31	4	0	35	0	117	0	0	117	4	35	0	117	chr4_1022564
chr4	1022572	1022572	48.6	48.6%_35r	chr4	1022572	PlexA	EXON	0	18	17	0	35	0	104	0	0	104	17	35	0	104	chr4_1022572
chr4	1022576	1022576	11.6	11.6%_43r	chr4	1022576	PlexA	EXON	0	38	5	0	43	1	97	0	0	98	5	43	0	98	chr4_1022576
chr4	1022603	1022603	7.1	7.1%_42r	chr4	1022603	PlexA	EXON	0	39	3	0	42	0	141	0	0	141	3	42	0	141	chr4_1022603
chr4	1022608	1022608	9.1	9.1%_44r	chr4	1022608	PlexA	EXON	0	40	4	0	44	0	157	0	0	157	4	44	0	157	chr4_1022608
chr4	1022610	1022610	12.8	12.8%_47r	chr4	1022610	PlexA	EXON	0	41	6	0	47	1	151	0	0	152	6	47	0	152	chr4_1022610
chr4	1022628	1022628	19.2	19.2%_26r	chr4	1022628	PlexA	EXON	0	21	5	0	26	0	130	0	0	130	5	26	0	130	chr4_1022628
chr4	1022633	1022633	21.4	21.4%_28r	chr4	1022633	PlexA	EXON	0	22	6	0	28	0	164	0	0	164	6	28	0	164	chr4_1022633
chr4	1022634	1022634	25	25.0%_28r	chr4	1022634	PlexA	EXON	0	21	7	0	28	0	164	0	0	164	7	28	0	164	chr4_1022634
chr4	1022635	1022635	13.8	13.8%_29r	chr4	1022635	PlexA	EXON	0	25	4	0	29	1	164	0	0	165	4	29	0	165	chr4_1022635
chr4	1022643	1022643	8.7	8.7%_23r	chr4	1022643	PlexA	EXON	0	21	2	0	23	0	154	0	1	155	2	23	0	155	chr4_1022643
chr4	1022647	1022647	21.7	21.7%_23r	chr4	1022647	PlexA	EXON	0	18	5	0	23	0	151	0	0	151	5	23	0	151	chr4_1022647
chr4	1022662	1022662	12.1	12.1%_33r	chr4	1022662	PlexA	EXON	0	29	4	0	33	0	113	0	0	113	4	33	0	113	chr4_1022662
chr4	1022681	1022681	25.5	25.5%_47r	chr4	1022681	PlexA	EXON	1	34	12	0	47	0	111	0	0	111	12	47	0	111	chr4_1022681
chr4	1022687	1022687	10.6	10.6%_47r	chr4	1022687	PlexA	EXON	0	42	5	0	47	0	118	0	0	118	5	47	0	118	chr4_1022687
chr4	1022691	1022691	7	7.0%_43r	chr4	1022691	PlexA	EXON	0	40	3	0	43	0	98	0	0	98	3	43	0	98	chr4_1022691
chr4	1022703	1022703	7.3	7.3%_41r	chr4	1022703	PlexA	EXON	0	38	3	0	41	0	97	0	0	97	3	41	0	97	chr4_1022703
chr4	1022710	1022710	7.9	7.9%_38r	chr4	1022710	PlexA	EXON	0	35	3	0	38	0	86	0	0	86	3	38	0	86	chr4_1022710
chr4	1022742	1022742	11.5	11.5%_26r	chr4	1022742	PlexA	EXON	0	23	3	0	26	0	84	0	0	84	3	26	0	84	chr4_1022742
chr4	1022745	1022745	7.4	7.4%_27r	chr4	1022745	PlexA	EXON	0	25	2	0	27	0	77	0	0	77	2	27	0	77	chr4_1022745
chr4	1022765	1022765	45.5	45.5%_22r	chr4	1022765	PlexA	EXON	0	12	10	0	22	0	70	0	0	70	10	22	0	70	chr4_1022765
chr4	1022780	1022780	6.9	6.9%_29r	chr4	1022780	PlexA	EXON	0	27	2	0	29	0	69	0	0	69	2	29	0	69	chr4_1022780
chr4	1022781	1022781	10	10.0%_30r	chr4	1022781	PlexA	EXON	0	27	3	0	30	0	74	0	1	75	3	30	0	75	chr4_1022781
chr4	1022813	1022813	10.7	10.7%_28r	chr4	1022813	PlexA	EXON	0	25	3	0	28	1	105	0	0	106	3	28	0	106	chr4_1022813
chr4	1022817	1022817	44.4	44.4%_27r	chr4	1022817	PlexA	EXON	0	15	12	0	27	0	110	0	0	110	12	27	0	110	chr4_1022817
chr4	1022838	1022838	6.5	6.5%_31r	chr4	1022838	PlexA	EXON	0	29	2	0	31	0	140	0	0	140	2	31	0	140	chr4_1022838
chr4	1022844	1022844	27.6	27.6%_29r	chr4	1022844	PlexA	EXON	0	21	8	0	29	1	137	0	0	138	8	29	0	138	chr4_1022844
chr4	1022855	1022855	10.3	10.3%_29r	chr4	1022855	PlexA	EXON	0	26	3	0	29	0	117	0	0	117	3	29	0	117	chr4_1022855
chr4	1022878	1022878	43.3	43.3%_30r	chr4	1022878	PlexA	EXON	0	17	13	0	30	0	116	0	1	117	13	30	0	117	chr4_1022878
chr4	1022879	1022879	6.7	6.7%_30r	chr4	1022879	PlexA	EXON	0	28	2	0	30	0	117	0	1	118	2	30	0	118	chr4_1022879
chr4	1022881	1022881	13.3	13.3%_30r	chr4	1022881	PlexA	EXON	0	26	4	0	30	0	119	0	0	119	4	30	0	119	chr4_1022881
chr4	1022898	1022898	6.1	6.1%_33r	chr4	1022898	PlexA	EXON	0	31	2	0	33	0	117	0	0	117	2	33	0	117	chr4_1022898
chr4	1022911	1022911	12.8	12.8%_47r	chr4	1022911	PlexA	EXON	0	41	6	0	47	0	100	0	1	101	6	47	0	101	chr4_1022911
chr4	1022918	1022918	8.3	8.3%_36r	chr4	1022918	PlexA	EXON	0	33	3	0	36	0	84	0	0	84	3	36	0	84	chr4_1022918
chr4	1022919	1022919	11.1	11.1%_36r	chr4	1022919	PlexA	EXON	0	32	4	0	36	1	86	0	0	87	4	36	0	87	chr4_1022919
chr4	1022927	1022927	16.1	16.1%_31r	chr4	1022927	PlexA	EXON	0	26	5	0	31	0	92	0	0	92	5	31	0	92	chr4_1022927
chr4	1022928	1022928	6.2	6.2%_32r	chr4	1022928	PlexA	EXON	0	30	2	0	32	0	91	0	0	91	2	32	0	91	chr4_1022928
chr4	1022974	1022974	8	8.0%_25r	chr4	1022974	PlexA	EXON	0	23	2	0	25	0	107	0	0	107	2	25	0	107	chr4_1022974
chr4	1022989	1022989	20.8	20.8%_24r	chr4	1022989	PlexA	EXON	0	19	5	0	24	0	132	0	0	132	5	24	0	132	chr4_1022989
chr4	1023001	1023001	9.5	9.5%_21r	chr4	1023001	PlexA	EXON	0	19	2	0	21	0	138	0	0	138	2	21	0	138	chr4_1023001
chr4	1023002	1023002	9.1	9.1%_22r	chr4	1023002	PlexA	EXON	0	20	2	0	22	0	142	0	0	142	2	22	0	142	chr4_1023002
chr4	1023030	1023030	15.6	15.6%_32r	chr4	1023030	PlexA	EXON	0	27	5	0	32	0	121	0	0	121	5	32	0	121	chr4_1023030
chr4	1023031	1023031	15.6	15.6%_32r	chr4	1023031	PlexA	EXON	0	27	5	0	32	0	123	0	0	123	5	32	0	123	chr4_1023031
chr4	1023060	1023060	6.5	6.5%_46r	chr4	1023060	PlexA	EXON	0	43	3	0	46	1	132	0	0	133	3	46	0	133	chr4_1023060
chr4	1023097	1023097	29	29.0%_31r	chr4	1023097	PlexA	EXON	0	22	9	0	31	0	89	0	0	89	9	31	0	89	chr4_1023097
chr4	1023119	1023119	6.5	6.5%_31r	chr4	1023119	PlexA	EXON	0	29	2	0	31	0	89	0	0	89	2	31	0	89	chr4_1023119
chr4	1023131	1023131	7.1	7.1%_28r	chr4	1023131	PlexA	EXON	0	26	2	0	28	0	80	0	0	80	2	28	0	80	chr4_1023131
chr4	1023132	1023132	7.4	7.4%_27r	chr4	1023132	PlexA	EXON	0	25	2	0	27	0	82	0	0	82	2	27	0	82	chr4_1023132
chr4	1023134	1023134	12	12.0%_25r	chr4	1023134	PlexA	EXON	0	22	3	0	25	0	77	0	0	77	3	25	0	77	chr4_1023134
chr4	1023144	1023144	7.1	7.1%_28r	chr4	1023144	PlexA	EXON	1	25	2	0	28	0	78	0	0	78	2	28	0	78	chr4_1023144
chr4	1023153	1023153	21.7	21.7%_23r	chr4	1023153	PlexA	EXON	0	18	5	0	23	0	87	0	1	88	5	23	0	88	chr4_1023153
chr4	1023155	1023155	8.7	8.7%_23r	chr4	1023155	PlexA	EXON	0	21	2	0	23	0	84	0	0	84	2	23	0	84	chr4_1023155
chr4	1023182	1023182	9.8	9.8%_41r	chr4	1023182	PlexA	EXON	0	37	4	0	41	0	103	0	0	103	4	41	0	103	chr4_1023182
chr4	1023192	1023192	25.8	25.8%_31r	chr4	1023192	PlexA	EXON	0	23	8	0	31	0	123	0	0	123	8	31	0	123	chr4_1023192
chr4	1023194	1023194	22.6	22.6%_31r	chr4	1023194	PlexA	EXON	0	24	7	0	31	0	136	0	0	136	7	31	0	136	chr4_1023194
chr4	1023238	1023238	22.6	22.6%_31r	chr4	1023238	PlexA	EXON	0	24	7	0	31	0	149	0	0	149	7	31	0	149	chr4_1023238
chr4	1023273	1023273	12.5	12.5%_24r	chr4	1023273	PlexA	EXON	0	21	3	0	24	0	98	0	0	98	3	24	0	98	chr4_1023273
chr4	1023276	1023276	8	8.0%_25r	chr4	1023276	PlexA	EXON	0	23	2	0	25	0	88	0	0	88	2	25	0	88	chr4_1023276
chr4	1023289	1023289	43.5	43.5%_23r	chr4	1023289	PlexA	EXON	0	13	10	0	23	0	96	0	0	96	10	23	0	96	chr4_1023289
chr4	1023318	1023318	11.4	11.4%_35r	chr4	1023318	PlexA	EXON	0	31	4	0	35	0	114	0	0	114	4	35	0	114	chr4_1023318
chr4	1023319	1023319	11.4	11.4%_35r	chr4	1023319	PlexA	EXON	0	31	4	0	35	1	112	0	0	113	4	35	0	113	chr4_1023319
chr4	1023334	1023334	23.1	23.1%_26r	chr4	1023334	PlexA	EXON	0	20	6	0	26	0	116	0	0	116	6	26	0	116	chr4_1023334
chr4	1023341	1023341	9.5	9.5%_21r	chr4	1023341	PlexA	EXON	0	19	2	0	21	0	106	0	0	106	2	21	0	106	chr4_1023341
chr4	1023359	1023359	8.6	8.6%_35r	chr4	1023359	PlexA	EXON	0	32	3	0	35	1	125	0	0	126	3	35	0	126	chr4_1023359
chr4	1023387	1023387	7.7	7.7%_39r	chr4	1023387	PlexA	EXON	0	34	3	2	39	0	120	0	0	120	3	39	0	120	chr4_1023387
chr4	1023388	1023388	23.1	23.1%_39r	chr4	1023388	PlexA	EXON	0	30	9	0	39	0	124	0	0	124	9	39	0	124	chr4_1023388
chr4	1023389	1023389	11.6	11.6%_43r	chr4	1023389	PlexA	EXON	0	38	5	0	43	0	125	0	0	125	5	43	0	125	chr4_1023389
chr4	1023399	1023399	8.7	8.7%_46r	chr4	1023399	PlexA	EXON	0	41	4	1	46	0	118	0	0	118	4	46	0	118	chr4_1023399
chr4	1023442	1023442	13.3	13.3%_30r	chr4	1023442	PlexA	EXON	0	26	4	0	30	0	163	0	0	163	4	30	0	163	chr4_1023442
chr4	1023444	1023444	16.1	16.1%_31r	chr4	1023444	PlexA	EXON	0	26	5	0	31	0	184	0	0	184	5	31	0	184	chr4_1023444
chr4	1023445	1023445	12.5	12.5%_32r	chr4	1023445	PlexA	EXON	0	28	4	0	32	0	194	0	0	194	4	32	0	194	chr4_1023445
chr4	1023467	1023467	14.8	14.8%_27r	chr4	1023467	PlexA	EXON	0	23	4	0	27	0	128	0	0	128	4	27	0	128	chr4_1023467
chr4	1023524	1023524	8.8	8.8%_34r	chr4	1023524	PlexA	EXON	0	31	3	0	34	0	103	0	0	103	3	34	0	103	chr4_1023524
chr4	1023526	1023526	8.8	8.8%_34r	chr4	1023526	PlexA	EXON	0	31	3	0	34	0	104	0	0	104	3	34	0	104	chr4_1023526
chr4	1023530	1023530	11.4	11.4%_35r	chr4	1023530	PlexA	EXON	0	31	4	0	35	0	108	0	0	108	4	35	0	108	chr4_1023530
chr4	1023540	1023540	15	15.0%_40r	chr4	1023540	PlexA	EXON	1	33	6	0	40	0	98	0	0	98	6	40	0	98	chr4_1023540
chr4	1023565	1023565	9.5	9.5%_21r	chr4	1023565	PlexA	EXON	0	19	2	0	21	0	69	0	0	69	2	21	0	69	chr4_1023565
chr4	1023584	1023584	16.7	16.7%_24r	chr4	1023584	PlexA	EXON	0	20	4	0	24	0	62	0	0	62	4	24	0	62	chr4_1023584
chr4	1023589	1023589	19.2	19.2%_26r	chr4	1023589	PlexA	EXON	0	21	5	0	26	0	61	0	0	61	5	26	0	61	chr4_1023589
chr4	1023604	1023604	15	15.0%_20r	chr4	1023604	PlexA	EXON	0	17	3	0	20	0	71	0	0	71	3	20	0	71	chr4_1023604
chr4	1023616	1023616	10	10.0%_20r	chr4	1023616	PlexA	EXON	0	18	2	0	20	0	84	0	0	84	2	20	0	84	chr4_1023616
chr4	1023620	1023620	15.4	15.4%_26r	chr4	1023620	PlexA	EXON	0	22	4	0	26	0	104	0	0	104	4	26	0	104	chr4_1023620
chr4	1023638	1023638	6.7	6.7%_30r	chr4	1023638	PlexA	EXON	0	28	2	0	30	0	115	0	0	115	2	30	0	115	chr4_1023638
chr4	1023647	1023647	12	12.0%_25r	chr4	1023647	PlexA	EXON	0	22	3	0	25	0	126	0	0	126	3	25	0	126	chr4_1023647
chr4	1023656	1023656	18.2	18.2%_22r	chr4	1023656	PlexA	EXON	0	18	4	0	22	0	140	0	0	140	4	22	0	140	chr4_1023656
chr4	1023676	1023676	6.5	6.5%_31r	chr4	1023676	PlexA	EXON	0	29	2	0	31	0	107	0	0	107	2	31	0	107	chr4_1023676
chr4	1027025	1027025	9.5	9.5%_21r	chr4	1027025	PlexA	EXON	0	19	2	0	21	0	26	0	0	26	2	21	0	26	chr4_1027025
chr4	460020	460020	7	7.0%_57r	chr4	460020	bip2	EXON	0	53	4	0	57	0	37	0	0	37	4	57	0	37	chr4_460020
chr4	460106	460106	10.1	10.1%_89r	chr4	460106	bip2	EXON	1	79	9	0	89	0	60	0	0	60	9	89	0	60	chr4_460106
chr4	460206	460206	6.2	6.2%_162r	chr4	460206	bip2	EXON	1	151	10	0	162	0	105	0	0	105	10	162	0	105	chr4_460206
chr4	460244	460244	6.3	6.3%_175r	chr4	460244	bip2	EXON	1	163	11	0	175	0	59	0	0	59	11	175	0	59	chr4_460244
chr4	460260	460260	17	17.0%_147r	chr4	460260	bip2	EXON	0	122	25	0	147	0	58	0	0	58	25	147	0	58	chr4_460260
chr4	460310	460310	36.8	36.8%_117r	chr4	460310	bip2	EXON	1	73	43	0	117	0	78	0	0	78	43	117	0	78	chr4_460310
chr4	460324	460324	8.3	8.3%_109r	chr4	460324	bip2	EXON	0	100	9	0	109	0	67	0	0	67	9	109	0	67	chr4_460324
chr4	460342	460342	8.7	8.7%_127r	chr4	460342	bip2	EXON	0	116	11	0	127	0	70	0	0	70	11	127	0	70	chr4_460342
chr4	460393	460393	6.8	6.8%_133r	chr4	460393	bip2	EXON	1	123	9	0	133	0	116	0	0	116	9	133	0	116	chr4_460393
chr4	460394	460394	20.9	20.9%_134r	chr4	460394	bip2	EXON	0	106	28	0	134	0	119	0	0	119	28	134	0	119	chr4_460394
chr4	460405	460405	9.4	9.4%_139r	chr4	460405	bip2	EXON	1	125	13	0	139	0	142	0	0	142	13	139	0	142	chr4_460405
chr4	460438	460438	41.4	41.4%_70r	chr4	460438	bip2	EXON	0	41	29	0	70	0	81	0	0	81	29	70	0	81	chr4_460438
chr4	460441	460441	16	16.0%_75r	chr4	460441	bip2	EXON	0	63	12	0	75	0	79	0	0	79	12	75	0	79	chr4_460441
chr4	460444	460444	12.6	12.6%_87r	chr4	460444	bip2	EXON	0	76	11	0	87	0	74	0	0	74	11	87	0	74	chr4_460444
chr4	460472	460472	12.4	12.4%_97r	chr4	460472	bip2	EXON	0	85	12	0	97	0	57	0	0	57	12	97	0	57	chr4_460472
chr4	460478	460478	48.8	48.8%_80r	chr4	460478	bip2	EXON	0	41	39	0	80	0	61	0	0	61	39	80	0	61	chr4_460478
chr4	460492	460492	20.3	20.3%_79r	chr4	460492	bip2	EXON	0	63	16	0	79	0	50	0	0	50	16	79	0	50	chr4_460492
chr4	460580	460580	9.2	9.2%_65r	chr4	460580	bip2	EXON	1	58	6	0	65	0	58	0	0	58	6	65	0	58	chr4_460580
chr4	460738	460738	17.1	17.1%_35r	chr4	460738	bip2	EXON	0	29	6	0	35	0	55	0	0	55	6	35	0	55	chr4_460738
chr4	460764	460764	20	20.0%_25r	chr4	460764	bip2	EXON	0	20	5	0	25	0	44	0	0	44	5	25	0	44	chr4_460764
chr4	460848	460848	10	10.0%_20r	chr4	460848	bip2	EXON	0	18	2	0	20	0	30	0	0	30	2	20	0	30	chr4_460848
chr4	460870	460870	31	31.0%_29r	chr4	460870	bip2	EXON	0	20	9	0	29	0	32	0	0	32	9	29	0	32	chr4_460870
chr4	460876	460876	7.7	7.7%_26r	chr4	460876	bip2	EXON	0	24	2	0	26	0	28	0	0	28	2	26	0	28	chr4_460876
chr4	460882	460882	11.1	11.1%_27r	chr4	460882	bip2	EXON	0	24	3	0	27	0	30	0	0	30	3	27	0	30	chr4_460882
chr4	460912	460912	11.8	11.8%_34r	chr4	460912	bip2	EXON	0	30	4	0	34	0	24	0	0	24	4	34	0	24	chr4_460912
chr4	460940	460940	50	50.0%_28r	chr4	460940	bip2	EXON	0	14	14	0	28	0	32	0	0	32	14	28	0	32	chr4_460940
chr4	460952	460952	10.7	10.7%_28r	chr4	460952	bip2	EXON	0	25	3	0	28	0	30	0	0	30	3	28	0	30	chr4_460952
chr4	460966	460966	36.4	36.4%_22r	chr4	460966	bip2	EXON	0	14	8	0	22	0	36	0	0	36	8	22	0	36	chr4_460966
chr4	461023	461023	7.7	7.7%_26r	chr4	461023	bip2	EXON	0	24	2	0	26	0	54	0	0	54	2	26	0	54	chr4_461023
chr4	461836	461836	19	19.0%_21r	chr4	461836	bip2	EXON	0	17	4	0	21	0	62	0	0	62	4	21	0	62	chr4_461836
chr4	461838	461838	9.1	9.1%_22r	chr4	461838	bip2	EXON	0	20	2	0	22	0	68	0	0	68	2	22	0	68	chr4_461838
chr4	462216	462216	8.7	8.7%_23r	chr4	462216	bip2	EXON	0	21	2	0	23	0	46	0	0	46	2	23	0	46	chr4_462216
chr4	462413	462413	9.1	9.1%_22r	chr4	462413	bip2	EXON	0	20	2	0	22	0	43	0	0	43	2	22	0	43	chr4_462413
chr4	463584	463584	8	8.0%_25r	chr4	463584	bip2	EXON	0	23	2	0	25	0	22	0	0	22	2	25	0	22	chr4_463584
chr4	463595	463595	13.6	13.6%_22r	chr4	463595	bip2	EXON	0	19	3	0	22	0	32	0	0	32	3	22	0	32	chr4_463595
chr4	463602	463602	15	15.0%_20r	chr4	463602	bip2	EXON	0	17	3	0	20	0	24	0	0	24	3	20	0	24	chr4_463602
chr4	464576	464576	12	12.0%_25r	chr4	464576	bip2	EXON	0	22	3	0	25	0	108	0	0	108	3	25	0	108	chr4_464576
chr4	464583	464583	29.2	29.2%_24r	chr4	464583	bip2	EXON	0	17	7	0	24	0	109	0	1	110	7	24	0	110	chr4_464583
chr4	464595	464595	9.1	9.1%_22r	chr4	464595	bip2	EXON	0	20	2	0	22	0	92	0	0	92	2	22	0	92	chr4_464595
chr4	464810	464810	33.3	33.3%_21r	chr4	464810	bip2	EXON	0	14	7	0	21	1	125	0	0	126	7	21	0	126	chr4_464810
chr4	464894	464894	10	10.0%_20r	chr4	464894	bip2	EXON	0	18	2	0	20	0	67	0	0	67	2	20	0	67	chr4_464894
chr4	464912	464912	8.7	8.7%_23r	chr4	464912	bip2	EXON	0	21	2	0	23	0	113	0	0	113	2	23	0	113	chr4_464912
chr4	465114	465114	31	31.0%_29r	chr4	465114	bip2	EXON	0	20	9	0	29	0	150	0	0	150	9	29	0	150	chr4_465114
chr4	465189	465189	23.8	23.8%_21r	chr4	465189	bip2	EXON	0	16	5	0	21	0	105	0	0	105	5	21	0	105	chr4_465189
chr4	465191	465191	10	10.0%_20r	chr4	465191	bip2	EXON	0	18	2	0	20	0	110	0	0	110	2	20	0	110	chr4_465191
chr4	466503	466503	6.9	6.9%_29r	chr4	466503	bip2	EXON	0	27	2	0	29	0	136	0	0	136	2	29	0	136	chr4_466503
chr4	466516	466516	9.6	9.6%_52r	chr4	466516	bip2	EXON	0	47	5	0	52	0	168	0	0	168	5	52	0	168	chr4_466516
chr4	466522	466522	6.5	6.5%_46r	chr4	466522	bip2	EXON	0	43	3	0	46	0	158	0	0	158	3	46	0	158	chr4_466522
chr4	466548	466548	6.7	6.7%_45r	chr4	466548	bip2	EXON	0	42	3	0	45	0	144	0	0	144	3	45	0	144	chr4_466548
chr4	466562	466562	6.4	6.4%_47r	chr4	466562	bip2	EXON	0	44	3	0	47	0	122	0	0	122	3	47	0	122	chr4_466562
chr4	466620	466620	7.1	7.1%_28r	chr4	466620	bip2	EXON	0	26	2	0	28	0	68	0	0	68	2	28	0	68	chr4_466620
chr4	466646	466646	25.9	25.9%_27r	chr4	466646	bip2	EXON	0	20	7	0	27	0	85	0	0	85	7	27	0	85	chr4_466646
chr4	467538	467538	19	19.0%_21r	chr4	467538	pncr013:4	EXON	17	0	0	4	21	48	0	0	0	48	4	21	0	48	chr4_467538
chr4	467575	467575	22.9	22.9%_35r	chr4	467575	pncr013:4	EXON	27	0	0	8	35	55	0	0	0	55	8	35	0	55	chr4_467575
chr4	467577	467577	8.3	8.3%_36r	chr4	467577	pncr013:4	EXON	33	0	0	3	36	59	0	0	0	59	3	36	0	59	chr4_467577
chr4	467584	467584	8.8	8.8%_34r	chr4	467584	pncr013:4	EXON	31	0	0	3	34	57	0	0	0	57	3	34	0	57	chr4_467584
chr4	467594	467594	7.1	7.1%_28r	chr4	467594	pncr013:4	EXON	26	0	0	2	28	53	0	0	0	53	2	28	0	53	chr4_467594
chr4	467609	467609	7.4	7.4%_27r	chr4	467609	pncr013:4	EXON	25	0	0	2	27	41	0	0	0	41	2	27	0	41	chr4_467609
chr4	467753	467753	42.9	42.9%_21r	chr4	467753	pncr013:4	EXON	12	0	0	9	21	110	0	0	0	110	9	21	0	110	chr4_467753
chr4	467765	467765	8.8	8.8%_34r	chr4	467765	pncr013:4	EXON	31	0	0	3	34	135	0	0	0	135	3	34	0	135	chr4_467765
chr4	467782	467782	10.7	10.7%_28r	chr4	467782	pncr013:4	EXON	25	0	0	3	28	144	0	0	0	144	3	28	0	144	chr4_467782
chr4	467783	467783	11.1	11.1%_27r	chr4	467783	pncr013:4	EXON	24	0	0	3	27	137	0	0	0	137	3	27	0	137	chr4_467783
chr4	467786	467786	10.3	10.3%_29r	chr4	467786	pncr013:4	EXON	26	0	0	3	29	130	0	0	0	130	3	29	0	130	chr4_467786
chr4	467798	467798	10.7	10.7%_28r	chr4	467798	pncr013:4	EXON	25	0	0	3	28	111	0	0	0	111	3	28	0	111	chr4_467798
chr4	467800	467800	6.9	6.9%_29r	chr4	467800	pncr013:4	EXON	27	0	0	2	29	113	0	0	0	113	2	29	0	113	chr4_467800
chr4	467813	467813	7.4	7.4%_27r	chr4	467813	pncr013:4	EXON	25	0	0	2	27	93	0	0	0	93	2	27	0	93	chr4_467813
chr4	467820	467820	20	20.0%_25r	chr4	467820	pncr013:4	EXON	20	0	0	5	25	67	0	0	0	67	5	25	0	67	chr4_467820
chr4	467944	467944	9.1	9.1%_44r	chr4	467944	pncr013:4	EXON	40	0	0	4	44	117	0	0	0	117	4	44	0	117	chr4_467944
chr4	467954	467954	48.3	48.3%_29r	chr4	467954	pncr013:4	EXON	15	0	0	14	29	107	0	0	0	107	14	29	0	107	chr4_467954
chr4	467969	467969	6.7	6.7%_30r	chr4	467969	pncr013:4	EXON	28	0	0	2	30	96	0	0	0	96	2	30	0	96	chr4_467969
chr4	467979	467979	7.4	7.4%_27r	chr4	467979	pncr013:4	EXON	25	0	0	2	27	88	0	0	0	88	2	27	0	88	chr4_467979
chr4	467980	467980	7.1	7.1%_28r	chr4	467980	pncr013:4	EXON	25	1	0	2	28	91	0	0	0	91	2	28	0	91	chr4_467980
chr4	467986	467986	8.3	8.3%_24r	chr4	467986	pncr013:4	EXON	22	0	0	2	24	90	0	0	0	90	2	24	0	90	chr4_467986
chr4	467987	467987	18.2	18.2%_22r	chr4	467987	pncr013:4	EXON	18	0	0	4	22	89	0	0	0	89	4	22	0	89	chr4_467987
chr4	467993	467993	30	30.0%_20r	chr4	467993	pncr013:4	EXON	14	0	0	6	20	83	0	2	0	85	6	20	0	85	chr4_467993
chr4	469257	469257	20	20.0%_25r	chr4	469257	pncr013:4	EXON	20	0	0	5	25	64	0	0	0	64	5	25	0	64	chr4_469257
chr4	471025	471025	20	20.0%_20r	chr4	471025	pncr013:4	EXON	15	1	0	4	20	93	0	0	0	93	4	20	0	93	chr4_471025
chr4	471089	471089	10	10.0%_20r	chr4	471089	pncr013:4	EXON	18	0	0	2	20	58	0	0	0	58	2	20	0	58	chr4_471089
chr4	471090	471090	13	13.0%_23r	chr4	471090	pncr013:4	EXON	20	0	0	3	23	58	0	0	0	58	3	23	0	58	chr4_471090
chr4	471100	471100	45.8	45.8%_24r	chr4	471100	pncr013:4	EXON	13	0	0	11	24	77	0	0	0	77	11	24	0	77	chr4_471100
chr4	471150	471150	9.1	9.1%_22r	chr4	471150	pncr013:4	EXON	20	0	0	2	22	62	0	0	0	62	2	22	0	62	chr4_471150
chr4	471154	471154	8.7	8.7%_23r	chr4	471154	pncr013:4	EXON	21	0	0	2	23	48	0	0	0	48	2	23	0	48	chr4_471154
chr4	471155	471155	7.4	7.4%_27r	chr4	471155	pncr013:4	EXON	25	0	0	2	27	47	0	0	0	47	2	27	0	47	chr4_471155
chr4	471338	471338	14.3	14.3%_21r	chr4	471338	pncr013:4	EXON	18	0	0	3	21	36	0	0	0	36	3	21	0	36	chr4_471338
chr4	471351	471351	8.7	8.7%_23r	chr4	471351	pncr013:4	EXON	21	0	0	2	23	34	0	0	0	34	2	23	0	34	chr4_471351
chr4	471374	471374	6.7	6.7%_30r	chr4	471374	pncr013:4	EXON	28	0	0	2	30	36	0	0	0	36	2	30	0	36	chr4_471374
chr4	503876	503876	10	10.0%_20r	chr4	503876	zfh2	EXON	18	0	0	2	20	95	0	0	0	95	2	20	0	95	chr4_503876
chr4	503882	503882	13.6	13.6%_22r	chr4	503882	zfh2	EXON	19	0	0	3	22	109	0	0	0	109	3	22	0	109	chr4_503882
chr4	503900	503900	9.1	9.1%_22r	chr4	503900	zfh2	EXON	20	0	0	2	22	108	0	0	0	108	2	22	0	108	chr4_503900
chr4	503963	503963	7	7.0%_43r	chr4	503963	zfh2	EXON	39	1	0	3	43	275	0	0	0	275	3	43	0	275	chr4_503963
chr4	503996	503996	6.4	6.4%_47r	chr4	503996	zfh2	EXON	44	0	0	3	47	221	0	0	0	221	3	47	0	221	chr4_503996
chr4	504006	504006	7.7	7.7%_26r	chr4	504006	zfh2	EXON	24	0	0	2	26	217	0	0	0	217	2	26	0	217	chr4_504006
chr4	504007	504007	19.2	19.2%_26r	chr4	504007	zfh2	EXON	21	0	0	5	26	220	0	0	0	220	5	26	0	220	chr4_504007
chr4	504039	504039	9.7	9.7%_31r	chr4	504039	zfh2	EXON	28	0	0	3	31	239	0	0	0	239	3	31	0	239	chr4_504039
chr4	504066	504066	20.8	20.8%_24r	chr4	504066	zfh2	EXON	19	0	0	5	24	193	0	1	0	194	5	24	0	194	chr4_504066
chr4	504074	504074	13.5	13.5%_37r	chr4	504074	zfh2	EXON	32	0	0	5	37	256	3	0	0	259	5	37	0	259	chr4_504074
chr4	504080	504080	14.7	14.7%_34r	chr4	504080	zfh2	EXON	29	0	0	5	34	202	0	0	0	202	5	34	0	202	chr4_504080
chr4	504110	504110	19.4	19.4%_31r	chr4	504110	zfh2	EXON	25	0	0	6	31	228	0	0	0	228	6	31	0	228	chr4_504110
chr4	504118	504118	9.4	9.4%_32r	chr4	504118	zfh2	EXON	29	0	0	3	32	230	0	1	0	231	3	32	0	231	chr4_504118
chr4	504128	504128	10.3	10.3%_29r	chr4	504128	zfh2	EXON	26	0	0	3	29	237	0	0	0	237	3	29	0	237	chr4_504128
chr4	504129	504129	48.3	48.3%_29r	chr4	504129	zfh2	EXON	15	0	0	14	29	235	0	0	0	235	14	29	0	235	chr4_504129
chr4	504132	504132	17.9	17.9%_28r	chr4	504132	zfh2	EXON	23	0	0	5	28	192	0	0	0	192	5	28	0	192	chr4_504132
chr4	515599	515599	10.8	10.8%_37r	chr4	515599	zfh2	EXON	33	0	0	4	37	286	0	0	0	286	4	37	0	286	chr4_515599
chr4	515626	515626	44	44.0%_25r	chr4	515626	zfh2	EXON	14	0	0	11	25	348	0	0	0	348	11	25	0	348	chr4_515626
chr4	515627	515627	7.7	7.7%_26r	chr4	515627	zfh2	EXON	24	0	0	2	26	328	0	0	0	328	2	26	0	328	chr4_515627
chr4	521486	521486	13.3	13.3%_30r	chr4	521486	zfh2	EXON	26	0	0	4	30	336	0	0	0	336	4	30	0	336	chr4_521486
chr4	521487	521487	6.9	6.9%_29r	chr4	521487	zfh2	EXON	27	0	0	2	29	322	1	0	0	323	2	29	0	323	chr4_521487
chr4	521493	521493	8	8.0%_25r	chr4	521493	zfh2	EXON	23	0	0	2	25	262	0	5	0	267	2	25	0	267	chr4_521493
chr4	521523	521523	6.7	6.7%_30r	chr4	521523	zfh2	EXON	27	1	0	2	30	244	0	0	0	244	2	30	0	244	chr4_521523
chr4	521524	521524	6.7	6.7%_30r	chr4	521524	zfh2	EXON	27	1	0	2	30	247	0	0	0	247	2	30	0	247	chr4_521524
chr4	521525	521525	20	20.0%_30r	chr4	521525	zfh2	EXON	24	0	0	6	30	243	0	0	0	243	6	30	0	243	chr4_521525
chr4	521531	521531	42.5	42.5%_40r	chr4	521531	zfh2	EXON	23	0	0	17	40	247	0	0	0	247	17	40	0	247	chr4_521531
chr4	521542	521542	9.4	9.4%_53r	chr4	521542	zfh2	EXON	48	0	0	5	53	299	0	0	0	299	5	53	0	299	chr4_521542
chr4	521561	521561	44.9	44.9%_49r	chr4	521561	zfh2	EXON	27	0	0	22	49	289	1	1	0	291	22	49	0	291	chr4_521561
chr4	521579	521579	10.2	10.2%_49r	chr4	521579	zfh2	EXON	44	0	0	5	49	333	0	1	0	334	5	49	0	334	chr4_521579
chr4	521605	521605	16.9	16.9%_59r	chr4	521605	zfh2	EXON	49	0	0	10	59	371	0	0	1	372	10	59	1	372	chr4_521605
chr4	521618	521618	8.2	8.2%_61r	chr4	521618	zfh2	EXON	56	0	0	5	61	333	0	0	0	333	5	61	0	333	chr4_521618
chr4	521639	521639	12.3	12.3%_65r	chr4	521639	zfh2	EXON	57	0	0	8	65	259	1	0	0	260	8	65	0	260	chr4_521639
chr4	521661	521661	10.2	10.2%_59r	chr4	521661	zfh2	EXON	53	0	0	6	59	325	1	1	0	327	6	59	0	327	chr4_521661
chr4	521679	521679	6.7	6.7%_45r	chr4	521679	zfh2	EXON	41	0	1	3	45	357	0	0	0	357	3	45	0	357	chr4_521679
chr4	521689	521689	11.1	11.1%_54r	chr4	521689	zfh2	EXON	48	0	0	6	54	388	0	0	0	388	6	54	0	388	chr4_521689
chr4	521695	521695	10.2	10.2%_59r	chr4	521695	zfh2	EXON	53	0	0	6	59	450	0	0	0	450	6	59	0	450	chr4_521695
chr4	521725	521725	10.8	10.8%_37r	chr4	521725	zfh2	EXON	32	1	0	4	37	346	1	1	0	348	4	37	0	348	chr4_521725
chr4	521726	521726	13.2	13.2%_38r	chr4	521726	zfh2	EXON	33	0	0	5	38	344	0	0	0	344	5	38	0	344	chr4_521726
chr4	521736	521736	7.1	7.1%_42r	chr4	521736	zfh2	EXON	39	0	0	3	42	340	1	0	0	341	3	42	0	341	chr4_521736
chr4	521796	521796	14.3	14.3%_35r	chr4	521796	zfh2	EXON	30	0	0	5	35	246	0	0	0	246	5	35	0	246	chr4_521796
chr4	521803	521803	12.9	12.9%_31r	chr4	521803	zfh2	EXON	27	0	0	4	31	204	0	1	0	205	4	31	0	205	chr4_521803
chr4	521830	521830	20	20.0%_30r	chr4	521830	zfh2	EXON	23	1	0	6	30	328	0	0	0	328	6	30	0	328	chr4_521830
chr4	521854	521854	25	25.0%_24r	chr4	521854	zfh2	EXON	18	0	0	6	24	290	0	0	1	291	6	24	1	291	chr4_521854
chr4	521855	521855	19.2	19.2%_26r	chr4	521855	zfh2	EXON	21	0	0	5	26	294	0	0	0	294	5	26	0	294	chr4_521855
chr4	521883	521883	15.4	15.4%_26r	chr4	521883	zfh2	EXON	22	0	0	4	26	234	0	0	0	234	4	26	0	234	chr4_521883
chr4	521884	521884	19.2	19.2%_26r	chr4	521884	zfh2	EXON	21	0	0	5	26	231	0	0	0	231	5	26	0	231	chr4_521884
chr4	521912	521912	34.1	34.1%_41r	chr4	521912	zfh2	EXON	27	0	0	14	41	317	0	0	0	317	14	41	0	317	chr4_521912
chr4	521919	521919	25	25.0%_36r	chr4	521919	zfh2	EXON	27	0	0	9	36	281	1	0	0	282	9	36	0	282	chr4_521919
chr4	521939	521939	51.7	51.7%_29r	chr4	521939	zfh2	EXON	14	0	0	15	29	353	0	0	0	353	15	29	0	353	chr4_521939
chr4	521940	521940	13.3	13.3%_30r	chr4	521940	zfh2	EXON	26	0	0	4	30	350	0	1	0	351	4	30	0	351	chr4_521940
chr4	521948	521948	8.1	8.1%_37r	chr4	521948	zfh2	EXON	33	1	0	3	37	394	0	0	0	394	3	37	0	394	chr4_521948
chr4	521960	521960	9.4	9.4%_32r	chr4	521960	zfh2	EXON	28	1	0	3	32	329	0	1	0	330	3	32	0	330	chr4_521960
chr4	522000	522000	13.7	13.7%_51r	chr4	522000	zfh2	EXON	44	0	0	7	51	348	0	0	0	348	7	51	0	348	chr4_522000
chr4	522032	522032	16.4	16.4%_67r	chr4	522032	zfh2	EXON	55	1	0	11	67	547	0	0	0	547	11	67	0	547	chr4_522032
chr4	522053	522053	13.3	13.3%_45r	chr4	522053	zfh2	EXON	39	0	0	6	45	368	1	1	0	370	6	45	0	370	chr4_522053
chr4	522054	522054	6.4	6.4%_47r	chr4	522054	zfh2	EXON	44	0	0	3	47	348	0	1	0	349	3	47	0	349	chr4_522054
chr4	522073	522073	7.7	7.7%_52r	chr4	522073	zfh2	EXON	46	0	2	4	52	462	0	0	0	462	4	52	0	462	chr4_522073
chr4	522086	522086	18	18.0%_61r	chr4	522086	zfh2	EXON	50	0	0	11	61	433	1	0	0	434	11	61	0	434	chr4_522086
chr4	522110	522110	11.8	11.8%_51r	chr4	522110	zfh2	EXON	45	0	0	6	51	462	1	0	0	463	6	51	0	463	chr4_522110
chr4	522111	522111	6.8	6.8%_59r	chr4	522111	zfh2	EXON	55	0	0	4	59	476	1	0	0	477	4	59	0	477	chr4_522111
chr4	522116	522116	11.8	11.8%_51r	chr4	522116	zfh2	EXON	45	0	0	6	51	465	0	0	0	465	6	51	0	465	chr4_522116
chr4	522118	522118	10.6	10.6%_47r	chr4	522118	zfh2	EXON	42	0	0	5	47	428	0	0	0	428	5	47	0	428	chr4_522118
chr4	522123	522123	18.9	18.9%_37r	chr4	522123	zfh2	EXON	30	0	0	7	37	359	0	0	0	359	7	37	0	359	chr4_522123
chr4	522146	522146	13.9	13.9%_36r	chr4	522146	zfh2	EXON	31	0	0	5	36	238	2	0	0	240	5	36	0	240	chr4_522146
chr4	522178	522178	12.5	12.5%_24r	chr4	522178	zfh2	EXON	21	0	0	3	24	154	0	1	0	155	3	24	0	155	chr4_522178
chr4	522185	522185	41.7	41.7%_24r	chr4	522185	zfh2	EXON	14	0	0	10	24	154	0	0	0	154	10	24	0	154	chr4_522185
chr4	522216	522216	10	10.0%_20r	chr4	522216	zfh2	EXON	18	0	0	2	20	166	0	0	0	166	2	20	0	166	chr4_522216
chr4	522231	522231	6.7	6.7%_30r	chr4	522231	zfh2	EXON	28	0	0	2	30	212	0	0	0	212	2	30	0	212	chr4_522231
chr4	522234	522234	23.3	23.3%_30r	chr4	522234	zfh2	EXON	23	0	0	7	30	230	0	0	0	230	7	30	0	230	chr4_522234
chr4	522249	522249	7.7	7.7%_39r	chr4	522249	zfh2	EXON	36	0	0	3	39	270	0	0	0	270	3	39	0	270	chr4_522249
chr4	522262	522262	14.6	14.6%_41r	chr4	522262	zfh2	EXON	35	0	0	6	41	285	1	0	0	286	6	41	0	286	chr4_522262
chr4	522287	522287	8.2	8.2%_61r	chr4	522287	zfh2	EXON	56	0	0	5	61	462	0	0	0	462	5	61	0	462	chr4_522287
chr4	522290	522290	9.3	9.3%_54r	chr4	522290	zfh2	EXON	49	0	0	5	54	423	1	0	0	424	5	54	0	424	chr4_522290
chr4	522328	522328	8.6	8.6%_58r	chr4	522328	zfh2	EXON	53	0	0	5	58	346	0	0	0	346	5	58	0	346	chr4_522328
chr4	522376	522376	9.8	9.8%_41r	chr4	522376	zfh2	EXON	36	1	0	4	41	227	0	1	0	228	4	41	0	228	chr4_522376
chr4	522378	522378	9.8	9.8%_41r	chr4	522378	zfh2	EXON	37	0	0	4	41	245	0	0	0	245	4	41	0	245	chr4_522378
chr4	522388	522388	9.4	9.4%_32r	chr4	522388	zfh2	EXON	29	0	0	3	32	252	0	0	0	252	3	32	0	252	chr4_522388
chr4	522409	522409	15.6	15.6%_45r	chr4	522409	zfh2	EXON	38	0	0	7	45	245	0	0	0	245	7	45	0	245	chr4_522409
chr4	522412	522412	25	25.0%_40r	chr4	522412	zfh2	EXON	30	0	0	10	40	245	1	0	0	246	10	40	0	246	chr4_522412
chr4	522425	522425	51.9	51.9%_54r	chr4	522425	zfh2	EXON	26	0	0	28	54	228	0	0	0	228	28	54	0	228	chr4_522425
chr4	522433	522433	6.3	6.3%_63r	chr4	522433	zfh2	EXON	59	0	0	4	63	320	0	1	0	321	4	63	0	321	chr4_522433
chr4	522470	522470	10	10.0%_70r	chr4	522470	zfh2	EXON	63	0	0	7	70	346	0	0	0	346	7	70	0	346	chr4_522470
chr4	522510	522510	33.3	33.3%_39r	chr4	522510	zfh2	EXON	26	0	0	13	39	215	0	1	0	216	13	39	0	216	chr4_522510
chr4	522514	522514	11.6	11.6%_43r	chr4	522514	zfh2	EXON	38	0	0	5	43	221	0	1	0	222	5	43	0	222	chr4_522514
chr4	522520	522520	14.3	14.3%_42r	chr4	522520	zfh2	EXON	35	1	0	6	42	177	0	0	0	177	6	42	0	177	chr4_522520
chr4	522544	522544	17.4	17.4%_23r	chr4	522544	zfh2	EXON	19	0	0	4	23	104	0	0	0	104	4	23	0	104	chr4_522544
chr4	522546	522546	8	8.0%_25r	chr4	522546	zfh2	EXON	23	0	0	2	25	92	0	0	0	92	2	25	0	92	chr4_522546
chr4	522569	522569	27.3	27.3%_22r	chr4	522569	zfh2	EXON	16	0	0	6	22	136	0	0	0	136	6	22	0	136	chr4_522569
chr4	522624	522624	10.5	10.5%_38r	chr4	522624	zfh2	EXON	34	0	0	4	38	217	0	0	0	217	4	38	0	217	chr4_522624
chr4	522625	522625	13.2	13.2%_38r	chr4	522625	zfh2	EXON	33	0	0	5	38	212	0	0	0	212	5	38	0	212	chr4_522625
chr4	522656	522656	34.7	34.7%_49r	chr4	522656	zfh2	EXON	32	0	0	17	49	279	0	0	0	279	17	49	0	279	chr4_522656
chr4	522668	522668	6.2	6.2%_48r	chr4	522668	zfh2	EXON	45	0	0	3	48	185	0	0	0	185	3	48	0	185	chr4_522668
chr4	522688	522688	30.2	30.2%_43r	chr4	522688	zfh2	EXON	29	1	0	13	43	151	1	0	0	152	13	43	0	152	chr4_522688
chr4	522704	522704	9.5	9.5%_42r	chr4	522704	zfh2	EXON	38	0	0	4	42	107	0	0	0	107	4	42	0	107	chr4_522704
chr4	522709	522709	8.7	8.7%_46r	chr4	522709	zfh2	EXON	41	0	1	4	46	118	0	0	0	118	4	46	0	118	chr4_522709
chr4	522719	522719	7.5	7.5%_40r	chr4	522719	zfh2	EXON	37	0	0	3	40	125	0	0	0	125	3	40	0	125	chr4_522719
chr4	522737	522737	8.6	8.6%_35r	chr4	522737	zfh2	EXON	32	0	0	3	35	138	0	0	0	138	3	35	0	138	chr4_522737
chr4	522739	522739	6.2	6.2%_32r	chr4	522739	zfh2	EXON	30	0	0	2	32	130	0	0	0	130	2	32	0	130	chr4_522739
chr4	522751	522751	6.9	6.9%_29r	chr4	522751	zfh2	EXON	27	0	0	2	29	125	0	1	0	126	2	29	0	126	chr4_522751
chr4	522858	522858	14.3	14.3%_21r	chr4	522858	zfh2	EXON	18	0	0	3	21	59	0	0	0	59	3	21	0	59	chr4_522858
chr4	522912	522912	9.1	9.1%_22r	chr4	522912	zfh2	EXON	19	1	0	2	22	30	0	0	0	30	2	22	0	30	chr4_522912
chr4	522930	522930	7.1	7.1%_28r	chr4	522930	zfh2	EXON	26	0	0	2	28	50	0	0	0	50	2	28	0	50	chr4_522930
chr4	522962	522962	6.5	6.5%_31r	chr4	522962	zfh2	EXON	29	0	0	2	31	72	0	0	0	72	2	31	0	72	chr4_522962
chr4	523034	523034	6.9	6.9%_29r	chr4	523034	zfh2	EXON	26	0	1	2	29	36	0	0	0	36	2	29	0	36	chr4_523034
chr4	523093	523093	15.2	15.2%_33r	chr4	523093	zfh2	EXON	27	1	0	5	33	87	1	0	0	88	5	33	0	88	chr4_523093
chr4	524361	524361	58.6	58.6%_29r	chr4	524361	zfh2	EXON	12	0	0	17	29	40	0	0	0	40	17	29	0	40	chr4_524361
chr4	524383	524383	14.3	14.3%_21r	chr4	524383	zfh2	EXON	18	0	0	3	21	24	0	0	0	24	3	21	0	24	chr4_524383
chr4	524417	524417	21.7	21.7%_23r	chr4	524417	zfh2	EXON	18	0	0	5	23	49	0	1	0	50	5	23	0	50	chr4_524417
chr4	524441	524441	15.4	15.4%_26r	chr4	524441	zfh2	EXON	21	1	0	4	26	47	0	0	0	47	4	26	0	47	chr4_524441
chr4	524453	524453	18.2	18.2%_22r	chr4	524453	zfh2	EXON	18	0	0	4	22	42	0	0	0	42	4	22	0	42	chr4_524453
chr4	524478	524478	8.7	8.7%_23r	chr4	524478	zfh2	EXON	21	0	0	2	23	44	0	0	0	44	2	23	0	44	chr4_524478
chr4	524501	524501	7.1	7.1%_28r	chr4	524501	zfh2	EXON	26	0	0	2	28	28	0	0	0	28	2	28	0	28	chr4_524501
chr4	524971	524971	8	8.0%_25r	chr4	524971	zfh2	EXON	22	1	0	2	25	42	0	0	0	42	2	25	0	42	chr4_524971
chr4	524982	524982	11.5	11.5%_26r	chr4	524982	zfh2	EXON	23	0	0	3	26	43	0	0	0	43	3	26	0	43	chr4_524982
chr4	524996	524996	7.1	7.1%_28r	chr4	524996	zfh2	EXON	26	0	0	2	28	47	0	0	0	47	2	28	0	47	chr4_524996
chr4	525002	525002	10	10.0%_30r	chr4	525002	zfh2	EXON	27	0	0	3	30	43	0	0	0	43	3	30	0	43	chr4_525002
chr4	525017	525017	39.1	39.1%_23r	chr4	525017	zfh2	EXON	14	0	0	9	23	46	0	0	0	46	9	23	0	46	chr4_525017
chr4	525021	525021	18.2	18.2%_22r	chr4	525021	zfh2	EXON	18	0	0	4	22	42	0	0	0	42	4	22	0	42	chr4_525021
chr4	525030	525030	13	13.0%_23r	chr4	525030	zfh2	EXON	20	0	0	3	23	44	0	0	0	44	3	23	0	44	chr4_525030
chr4	525031	525031	8.7	8.7%_23r	chr4	525031	zfh2	EXON	21	0	0	2	23	44	0	0	0	44	2	23	0	44	chr4_525031
chr4	537616	537616	6.7	6.7%_30r	chr4	537616	zfh2	EXON	28	0	0	2	30	203	0	0	0	203	2	30	0	203	chr4_537616
chr4	538050	538050	15	15.0%_20r	chr4	538050	zfh2	EXON	17	0	0	3	20	210	1	0	0	211	3	20	0	211	chr4_538050
chr4	538053	538053	13	13.0%_23r	chr4	538053	zfh2	EXON	20	0	0	3	23	214	0	0	1	215	3	23	1	215	chr4_538053
chr4	538056	538056	16.7	16.7%_24r	chr4	538056	zfh2	EXON	20	0	0	4	24	207	0	0	0	207	4	24	0	207	chr4_538056
chr4	538070	538070	6.7	6.7%_30r	chr4	538070	zfh2	EXON	28	0	0	2	30	198	0	0	0	198	2	30	0	198	chr4_538070
chr4	538078	538078	12	12.0%_25r	chr4	538078	zfh2	EXON	22	0	0	3	25	189	0	0	0	189	3	25	0	189	chr4_538078
chr4	538268	538268	9.5	9.5%_21r	chr4	538268	zfh2	EXON	19	0	0	2	21	231	0	1	0	232	2	21	0	232	chr4_538268
chr4	538303	538303	6.7	6.7%_30r	chr4	538303	zfh2	EXON	27	1	0	2	30	249	0	0	0	249	2	30	0	249	chr4_538303
chr4	538307	538307	14.3	14.3%_28r	chr4	538307	zfh2	EXON	24	0	0	4	28	251	0	0	0	251	4	28	0	251	chr4_538307
chr4	538310	538310	7.1	7.1%_28r	chr4	538310	zfh2	EXON	26	0	0	2	28	275	0	0	0	275	2	28	0	275	chr4_538310
chr4	133798	133798	15	15.0%_20r	chr4	133798	CG32000	EXON	17	0	0	3	20	79	0	0	0	79	3	20	0	79	chr4_133798
chr4	137922	137922	10	10.0%_20r	chr4	137922	CG32000	EXON	18	0	0	2	20	60	0	0	0	60	2	20	0	60	chr4_137922
chr4	141659	141659	14.3	14.3%_21r	chr4	141659	CG32000	EXON	18	0	0	3	21	45	0	0	0	45	3	21	0	45	chr4_141659
chr4	141661	141661	10	10.0%_20r	chr4	141661	CG32000	EXON	18	0	0	2	20	44	0	0	0	44	2	20	0	44	chr4_141661
chr4	143042	143042	15	15.0%_20r	chr4	143042	CG32000	EXON	17	0	0	3	20	60	0	0	0	60	3	20	0	60	chr4_143042
chr4	311200	311200	10	10.0%_20r	chr4	311200	Zip102B	EXON	0	18	2	0	20	0	39	0	0	39	2	20	0	39	chr4_311200
chr4	311458	311458	9.5	9.5%_21r	chr4	311458	Zip102B	EXON	0	19	2	0	21	0	63	0	0	63	2	21	0	63	chr4_311458
chr4	311459	311459	15	15.0%_20r	chr4	311459	Zip102B	EXON	0	17	3	0	20	0	63	0	0	63	3	20	0	63	chr4_311459
chr4	311486	311486	6.5	6.5%_31r	chr4	311486	Zip102B	EXON	0	29	2	0	31	0	96	0	0	96	2	31	0	96	chr4_311486
chr4	311491	311491	6.7	6.7%_30r	chr4	311491	Zip102B	EXON	0	28	2	0	30	0	93	0	0	93	2	30	0	93	chr4_311491
chr4	311495	311495	62.1	62.1%_29r	chr4	311495	Zip102B	EXON	0	11	18	0	29	0	94	0	0	94	18	29	0	94	chr4_311495
chr4	311518	311518	35.7	35.7%_28r	chr4	311518	Zip102B	EXON	0	18	10	0	28	0	44	0	0	44	10	28	0	44	chr4_311518
chr4	311520	311520	48	48.0%_25r	chr4	311520	Zip102B	EXON	0	13	12	0	25	0	43	0	0	43	12	25	0	43	chr4_311520
chr4	311533	311533	8.3	8.3%_24r	chr4	311533	Zip102B	EXON	0	22	2	0	24	0	29	0	0	29	2	24	0	29	chr4_311533
chr4	311586	311586	20	20.0%_20r	chr4	311586	Zip102B	EXON	0	16	4	0	20	0	42	0	0	42	4	20	0	42	chr4_311586
chr4	311724	311724	6.1	6.1%_33r	chr4	311724	Zip102B	EXON	0	31	2	0	33	0	64	0	0	64	2	33	0	64	chr4_311724
chr4	311726	311726	6.2	6.2%_32r	chr4	311726	Zip102B	EXON	0	30	2	0	32	0	65	0	0	65	2	32	0	65	chr4_311726
chr4	312131	312131	17.4	17.4%_23r	chr4	312131	Zip102B	EXON	0	19	4	0	23	0	35	0	0	35	4	23	0	35	chr4_312131
chr4	312151	312151	7.7	7.7%_26r	chr4	312151	Zip102B	EXON	0	24	2	0	26	0	18	0	0	18	2	26	0	18	chr4_312151
chr4	312165	312165	9.5	9.5%_21r	chr4	312165	Zip102B	EXON	0	19	2	0	21	0	24	0	0	24	2	21	0	24	chr4_312165
chr4	312757	312757	7.7	7.7%_26r	chr4	312757	Zip102B	EXON	0	24	2	0	26	0	173	0	0	173	2	26	0	173	chr4_312757
chr4	312813	312813	12.6	12.6%_111r	chr4	312813	Zip102B	EXON	0	97	14	0	111	0	496	0	0	496	14	111	0	496	chr4_312813
chr4	312823	312823	31	31.0%_113r	chr4	312823	Zip102B	EXON	0	77	35	1	113	0	556	0	0	556	35	113	0	556	chr4_312823
chr4	312829	312829	9.3	9.3%_107r	chr4	312829	Zip102B	EXON	0	97	10	0	107	1	485	0	2	488	10	107	0	488	chr4_312829
chr4	312840	312840	7.6	7.6%_92r	chr4	312840	Zip102B	EXON	0	85	7	0	92	2	343	0	0	345	7	92	0	345	chr4_312840
chr4	312846	312846	14	14.0%_86r	chr4	312846	Zip102B	EXON	1	73	12	0	86	0	310	0	0	310	12	86	0	310	chr4_312846
chr4	312847	312847	7	7.0%_86r	chr4	312847	Zip102B	EXON	0	80	6	0	86	0	320	0	0	320	6	86	0	320	chr4_312847
chr4	312871	312871	34	34.0%_53r	chr4	312871	Zip102B	EXON	0	35	18	0	53	0	393	0	0	393	18	53	0	393	chr4_312871
chr4	312872	312872	56.6	56.6%_53r	chr4	312872	Zip102B	EXON	0	23	30	0	53	0	403	0	0	403	30	53	0	403	chr4_312872
chr4	312879	312879	11.8	11.8%_68r	chr4	312879	Zip102B	EXON	0	60	8	0	68	0	518	0	0	518	8	68	0	518	chr4_312879
chr4	312890	312890	7.4	7.4%_81r	chr4	312890	Zip102B	EXON	0	75	6	0	81	0	536	0	0	536	6	81	0	536	chr4_312890
chr4	312903	312903	66.7	66.7%_45r	chr4	312903	Zip102B	EXON	0	15	30	0	45	0	518	0	0	518	30	45	0	518	chr4_312903
chr4	312925	312925	42.9	42.9%_49r	chr4	312925	Zip102B	EXON	0	28	21	0	49	0	370	0	0	370	21	49	0	370	chr4_312925
chr4	312951	312951	6.3	6.3%_63r	chr4	312951	Zip102B	EXON	0	59	4	0	63	0	351	0	1	352	4	63	0	352	chr4_312951
chr4	312953	312953	16.1	16.1%_62r	chr4	312953	Zip102B	EXON	0	52	10	0	62	0	355	0	0	355	10	62	0	355	chr4_312953
chr4	312954	312954	7.6	7.6%_66r	chr4	312954	Zip102B	EXON	0	61	5	0	66	0	384	0	0	384	5	66	0	384	chr4_312954
chr4	312977	312977	28.7	28.7%_80r	chr4	312977	Zip102B	EXON	0	57	23	0	80	0	430	0	0	430	23	80	0	430	chr4_312977
chr4	312979	312979	44.3	44.3%_79r	chr4	312979	Zip102B	EXON	0	44	35	0	79	0	423	0	0	423	35	79	0	423	chr4_312979
chr4	312982	312982	10.5	10.5%_86r	chr4	312982	Zip102B	EXON	0	77	9	0	86	0	443	0	0	443	9	86	0	443	chr4_312982
chr4	312996	312996	22.4	22.4%_76r	chr4	312996	Zip102B	EXON	0	59	17	0	76	1	505	0	1	507	17	76	0	507	chr4_312996
chr4	313038	313038	13	13.0%_92r	chr4	313038	Zip102B	EXON	0	80	12	0	92	1	708	0	0	709	12	92	0	709	chr4_313038
chr4	313044	313044	41.8	41.8%_67r	chr4	313044	Zip102B	EXON	0	39	28	0	67	1	594	0	0	595	28	67	0	595	chr4_313044
chr4	313065	313065	13.9	13.9%_72r	chr4	313065	Zip102B	EXON	0	62	10	0	72	0	473	0	0	473	10	72	0	473	chr4_313065
chr4	313070	313070	43.8	43.8%_64r	chr4	313070	Zip102B	EXON	0	36	28	0	64	0	554	0	1	555	28	64	0	555	chr4_313070
chr4	313076	313076	18.2	18.2%_77r	chr4	313076	Zip102B	EXON	1	62	14	0	77	0	550	0	0	550	14	77	0	550	chr4_313076
chr4	313146	313146	37.5	37.5%_40r	chr4	313146	Zip102B	EXON	0	25	15	0	40	0	440	0	0	440	15	40	0	440	chr4_313146
chr4	313165	313165	14.3	14.3%_49r	chr4	313165	Zip102B	EXON	0	42	7	0	49	0	431	0	0	431	7	49	0	431	chr4_313165
chr4	313168	313168	17	17.0%_47r	chr4	313168	Zip102B	EXON	0	39	8	0	47	0	444	1	0	445	8	47	1	445	chr4_313168
chr4	313169	313169	28.3	28.3%_46r	chr4	313169	Zip102B	EXON	0	33	13	0	46	0	450	0	1	451	13	46	0	451	chr4_313169
chr4	313170	313170	10.9	10.9%_46r	chr4	313170	Zip102B	EXON	0	41	5	0	46	0	462	0	0	462	5	46	0	462	chr4_313170
chr4	313171	313171	17.5	17.5%_40r	chr4	313171	Zip102B	EXON	0	33	7	0	40	0	448	0	0	448	7	40	0	448	chr4_313171
chr4	313186	313186	10.8	10.8%_74r	chr4	313186	Zip102B	EXON	0	66	8	0	74	0	539	0	2	541	8	74	0	541	chr4_313186
chr4	313192	313192	8.3	8.3%_60r	chr4	313192	Zip102B	EXON	0	55	5	0	60	0	497	0	1	498	5	60	0	498	chr4_313192
chr4	313201	313201	17.9	17.9%_56r	chr4	313201	Zip102B	EXON	0	46	10	0	56	0	601	0	0	601	10	56	0	601	chr4_313201
chr4	313204	313204	67.9	67.9%_53r	chr4	313204	Zip102B	EXON	0	17	36	0	53	1	540	0	0	541	36	53	0	541	chr4_313204
chr4	313225	313225	31.6	31.6%_57r	chr4	313225	Zip102B	EXON	0	39	18	0	57	0	605	0	1	606	18	57	0	606	chr4_313225
chr4	313255	313255	35.6	35.6%_59r	chr4	313255	Zip102B	EXON	0	38	21	0	59	0	481	0	0	481	21	59	0	481	chr4_313255
chr4	313263	313263	8.5	8.5%_71r	chr4	313263	Zip102B	EXON	0	65	6	0	71	1	443	0	0	444	6	71	0	444	chr4_313263
chr4	313276	313276	68.2	68.2%_66r	chr4	313276	Zip102B	EXON	0	21	45	0	66	0	445	0	0	445	45	66	0	445	chr4_313276
chr4	313279	313279	26	26.0%_73r	chr4	313279	Zip102B	EXON	0	54	19	0	73	0	480	0	2	482	19	73	0	482	chr4_313279
chr4	313358	313358	42.9	42.9%_77r	chr4	313358	Zip102B	EXON	0	44	33	0	77	0	488	0	0	488	33	77	0	488	chr4_313358
chr4	313411	313411	31.2	31.2%_64r	chr4	313411	Zip102B	EXON	0	44	20	0	64	0	482	0	1	483	20	64	0	483	chr4_313411
chr4	313419	313419	41.9	41.9%_74r	chr4	313419	Zip102B	EXON	0	43	31	0	74	0	552	0	0	552	31	74	0	552	chr4_313419
chr4	313420	313420	41.1	41.1%_73r	chr4	313420	Zip102B	EXON	0	43	30	0	73	0	552	0	0	552	30	73	0	552	chr4_313420
chr4	313431	313431	10.4	10.4%_96r	chr4	313431	Zip102B	EXON	0	86	10	0	96	0	498	0	0	498	10	96	0	498	chr4_313431
chr4	313493	313493	8.3	8.3%_133r	chr4	313493	Zip102B	EXON	0	121	11	1	133	0	423	0	0	423	11	133	0	423	chr4_313493
chr4	313497	313497	6.3	6.3%_127r	chr4	313497	Zip102B	EXON	0	119	8	0	127	0	420	0	0	420	8	127	0	420	chr4_313497
chr4	313505	313505	6.5	6.5%_107r	chr4	313505	Zip102B	EXON	0	100	7	0	107	0	370	0	3	373	7	107	0	373	chr4_313505
chr4	313517	313517	9.5	9.5%_95r	chr4	313517	Zip102B	EXON	0	86	9	0	95	0	352	0	0	352	9	95	0	352	chr4_313517
chr4	313601	313601	20.5	20.5%_73r	chr4	313601	Zip102B	EXON	0	58	15	0	73	0	396	0	0	396	15	73	0	396	chr4_313601
chr4	313638	313638	20.4	20.4%_49r	chr4	313638	Zip102B	EXON	1	38	10	0	49	0	233	0	0	233	10	49	0	233	chr4_313638
chr4	313639	313639	8.3	8.3%_48r	chr4	313639	Zip102B	EXON	0	44	4	0	48	0	253	0	2	255	4	48	0	255	chr4_313639
chr4	313640	313640	8.3	8.3%_48r	chr4	313640	Zip102B	EXON	0	44	4	0	48	1	253	0	0	254	4	48	0	254	chr4_313640
chr4	313723	313723	6.7	6.7%_45r	chr4	313723	Zip102B	EXON	0	42	3	0	45	0	63	0	0	63	3	45	0	63	chr4_313723
chr4	313733	313733	20.8	20.8%_53r	chr4	313733	Zip102B	EXON	0	42	11	0	53	0	68	0	0	68	11	53	0	68	chr4_313733
chr4	313754	313754	9.8	9.8%_61r	chr4	313754	Zip102B	EXON	0	55	6	0	61	0	307	1	0	308	6	61	1	308	chr4_313754
chr4	313757	313757	6.1	6.1%_66r	chr4	313757	Zip102B	EXON	0	62	4	0	66	0	329	0	0	329	4	66	0	329	chr4_313757
chr4	313772	313772	22.1	22.1%_77r	chr4	313772	Zip102B	EXON	0	60	17	0	77	0	440	0	0	440	17	77	0	440	chr4_313772
chr4	313781	313781	13.4	13.4%_67r	chr4	313781	Zip102B	EXON	0	58	9	0	67	0	367	0	0	367	9	67	0	367	chr4_313781
chr4	313788	313788	6.3	6.3%_79r	chr4	313788	Zip102B	EXON	0	74	5	0	79	0	408	0	0	408	5	79	0	408	chr4_313788
chr4	313804	313804	14	14.0%_86r	chr4	313804	Zip102B	EXON	0	74	12	0	86	0	360	0	0	360	12	86	0	360	chr4_313804
chr4	313829	313829	10.9	10.9%_64r	chr4	313829	Zip102B	EXON	0	57	7	0	64	0	248	0	0	248	7	64	0	248	chr4_313829
chr4	313834	313834	8.2	8.2%_61r	chr4	313834	Zip102B	EXON	0	54	5	2	61	0	262	0	0	262	5	61	0	262	chr4_313834
chr4	313839	313839	6.9	6.9%_58r	chr4	313839	Zip102B	EXON	0	54	4	0	58	0	259	0	0	259	4	58	0	259	chr4_313839
chr4	313846	313846	8	8.0%_50r	chr4	313846	Zip102B	EXON	0	46	4	0	50	0	276	0	0	276	4	50	0	276	chr4_313846
chr4	610738	610738	20	20.0%_20r	chr4	610738	Eph	EXON	16	0	0	4	20	58	0	0	0	58	4	20	0	58	chr4_610738
chr4	610787	610787	13.3	13.3%_30r	chr4	610787	Eph	EXON	26	0	0	4	30	74	0	0	0	74	4	30	0	74	chr4_610787
chr4	610806	610806	10.7	10.7%_28r	chr4	610806	Eph	EXON	25	0	0	3	28	110	0	0	0	110	3	28	0	110	chr4_610806
chr4	610809	610809	17.9	17.9%_28r	chr4	610809	Eph	EXON	23	0	0	5	28	96	0	0	0	96	5	28	0	96	chr4_610809
chr4	610812	610812	13.8	13.8%_29r	chr4	610812	Eph	EXON	25	0	0	4	29	91	0	0	0	91	4	29	0	91	chr4_610812
chr4	610817	610817	24.1	24.1%_29r	chr4	610817	Eph	EXON	22	0	0	7	29	87	0	0	0	87	7	29	0	87	chr4_610817
chr4	610855	610855	18.8	18.8%_32r	chr4	610855	Eph	EXON	26	0	0	6	32	60	0	0	0	60	6	32	0	60	chr4_610855
chr4	610856	610856	15.6	15.6%_32r	chr4	610856	Eph	EXON	27	0	0	5	32	59	0	0	0	59	5	32	0	59	chr4_610856
chr4	610857	610857	6.2	6.2%_32r	chr4	610857	Eph	EXON	30	0	0	2	32	59	0	0	0	59	2	32	0	59	chr4_610857
chr4	610895	610895	22.6	22.6%_31r	chr4	610895	Eph	EXON	24	0	0	7	31	103	0	0	0	103	7	31	0	103	chr4_610895
chr4	611401	611401	9.7	9.7%_31r	chr4	611401	Eph	EXON	28	0	0	3	31	69	0	0	0	69	3	31	0	69	chr4_611401
chr4	611428	611428	10	10.0%_40r	chr4	611428	Eph	EXON	36	0	0	4	40	97	0	0	0	97	4	40	0	97	chr4_611428
chr4	611487	611487	7.5	7.5%_40r	chr4	611487	Eph	EXON	37	0	0	3	40	119	0	0	0	119	3	40	0	119	chr4_611487
chr4	1172557	1172557	14.3	14.3%_21r	chr4	1172557	pho	EXON	0	18	3	0	21	0	36	0	0	36	3	21	0	36	chr4_1172557
chr4	1172839	1172839	36.4	36.4%_22r	chr4	1172839	pho	EXON	0	14	8	0	22	0	101	0	0	101	8	22	0	101	chr4_1172839
chr4	1172840	1172840	22.7	22.7%_22r	chr4	1172840	pho	EXON	0	17	5	0	22	0	101	0	0	101	5	22	0	101	chr4_1172840
chr4	1172852	1172852	13	13.0%_23r	chr4	1172852	pho	EXON	0	20	3	0	23	0	95	0	0	95	3	23	0	95	chr4_1172852
chr4	1172857	1172857	70	70.0%_20r	chr4	1172857	pho	EXON	0	6	14	0	20	0	88	0	0	88	14	20	0	88	chr4_1172857
chr4	1172866	1172866	30.4	30.4%_23r	chr4	1172866	pho	EXON	0	16	7	0	23	0	94	0	0	94	7	23	0	94	chr4_1172866
chr4	1172867	1172867	17.4	17.4%_23r	chr4	1172867	pho	EXON	0	19	4	0	23	0	87	0	0	87	4	23	0	87	chr4_1172867
chr4	1172895	1172895	7.7	7.7%_26r	chr4	1172895	pho	EXON	0	24	2	0	26	0	192	0	0	192	2	26	0	192	chr4_1172895
chr4	1172921	1172921	7.7	7.7%_39r	chr4	1172921	pho	EXON	0	36	3	0	39	0	186	0	1	187	3	39	0	187	chr4_1172921
chr4	1172932	1172932	9.4	9.4%_32r	chr4	1172932	pho	EXON	0	29	3	0	32	0	196	0	0	196	3	32	0	196	chr4_1172932
chr4	1172963	1172963	7.7	7.7%_26r	chr4	1172963	pho	EXON	0	24	2	0	26	0	160	0	0	160	2	26	0	160	chr4_1172963
chr4	1172978	1172978	45.5	45.5%_22r	chr4	1172978	pho	EXON	0	12	10	0	22	0	111	0	0	111	10	22	0	111	chr4_1172978
chr4	1172980	1172980	45	45.0%_20r	chr4	1172980	pho	EXON	0	11	9	0	20	0	112	0	0	112	9	20	0	112	chr4_1172980
chr4	1172981	1172981	20	20.0%_20r	chr4	1172981	pho	EXON	0	16	4	0	20	0	116	0	1	117	4	20	0	117	chr4_1172981
chr4	1172992	1172992	8.7	8.7%_23r	chr4	1172992	pho	EXON	0	21	2	0	23	0	90	0	0	90	2	23	0	90	chr4_1172992
chr4	1173141	1173141	7.7	7.7%_26r	chr4	1173141	pho	EXON	0	24	2	0	26	0	87	0	0	87	2	26	0	87	chr4_1173141
chr4	1173142	1173142	25	25.0%_28r	chr4	1173142	pho	EXON	0	21	7	0	28	0	90	0	0	90	7	28	0	90	chr4_1173142
chr4	1173145	1173145	11.5	11.5%_26r	chr4	1173145	pho	EXON	0	23	3	0	26	0	102	0	0	102	3	26	0	102	chr4_1173145
chr4	1173170	1173170	12.5	12.5%_24r	chr4	1173170	pho	EXON	0	21	3	0	24	0	169	0	0	169	3	24	0	169	chr4_1173170
chr4	1173812	1173812	10	10.0%_20r	chr4	1173812	pho	EXON	0	18	2	0	20	1	131	0	0	132	2	20	0	132	chr4_1173812
chr4	1173832	1173832	23.8	23.8%_21r	chr4	1173832	pho	EXON	0	16	5	0	21	0	89	0	0	89	5	21	0	89	chr4_1173832
chr4	1173833	1173833	42.9	42.9%_21r	chr4	1173833	pho	EXON	0	12	9	0	21	0	90	0	0	90	9	21	0	90	chr4_1173833
chr4	1173834	1173834	42.9	42.9%_21r	chr4	1173834	pho	EXON	0	12	9	0	21	0	94	0	0	94	9	21	0	94	chr4_1173834
chr4	1173974	1173974	10	10.0%_20r	chr4	1173974	pho	EXON	0	18	2	0	20	0	120	0	0	120	2	20	0	120	chr4_1173974
chr4	1173981	1173981	18.2	18.2%_22r	chr4	1173981	pho	EXON	0	18	4	0	22	0	122	0	0	122	4	22	0	122	chr4_1173981
chr4	1173994	1173994	10	10.0%_20r	chr4	1173994	pho	EXON	0	18	2	0	20	0	140	0	0	140	2	20	0	140	chr4_1173994
chr4	1174004	1174004	8.7	8.7%_23r	chr4	1174004	pho	EXON	0	21	2	0	23	0	153	0	0	153	2	23	0	153	chr4_1174004
chr4	1174059	1174059	25	25.0%_20r	chr4	1174059	pho	EXON	0	15	5	0	20	0	131	0	0	131	5	20	0	131	chr4_1174059
chr4	1174244	1174244	14.3	14.3%_21r	chr4	1174244	pho	EXON	1	17	3	0	21	0	117	0	0	117	3	21	0	117	chr4_1174244
chr4	1174470	1174470	27.3	27.3%_22r	chr4	1174470	pho	EXON	0	16	6	0	22	0	160	0	0	160	6	22	0	160	chr4_1174470
chr4	1174512	1174512	21.7	21.7%_23r	chr4	1174512	pho	EXON	0	18	5	0	23	0	120	0	0	120	5	23	0	120	chr4_1174512
chr4	1174513	1174513	9.1	9.1%_22r	chr4	1174513	pho	EXON	0	20	2	0	22	0	120	0	0	120	2	22	0	120	chr4_1174513
chr4	1174675	1174675	9.5	9.5%_21r	chr4	1174675	pho	EXON	0	19	2	0	21	0	133	0	0	133	2	21	0	133	chr4_1174675
chr4	1174760	1174760	6.7	6.7%_30r	chr4	1174760	pho	EXON	0	28	2	0	30	0	137	0	0	137	2	30	0	137	chr4_1174760
chr4	1174775	1174775	8.7	8.7%_23r	chr4	1174775	pho	EXON	0	21	2	0	23	0	114	0	0	114	2	23	0	114	chr4_1174775
chr4	1174781	1174781	13	13.0%_23r	chr4	1174781	pho	EXON	0	20	3	0	23	0	120	0	0	120	3	23	0	120	chr4_1174781
chr4	1174782	1174782	18.2	18.2%_22r	chr4	1174782	pho	EXON	0	18	4	0	22	0	117	0	0	117	4	22	0	117	chr4_1174782
chr4	1174783	1174783	77.3	77.3%_22r	chr4	1174783	pho	EXON	0	5	17	0	22	0	119	0	0	119	17	22	0	119	chr4_1174783
chr4	1175011	1175011	9.5	9.5%_21r	chr4	1175011	pho	EXON	0	19	2	0	21	0	60	0	1	61	2	21	0	61	chr4_1175011
chr4	1181172	1181172	9.5	9.5%_21r	chr4	1181172	pho	EXON	0	19	2	0	21	0	84	0	0	84	2	21	0	84	chr4_1181172
chr4	545486	545486	8.7	8.7%_23r	chr4	545486	Thd1	EXON	0	21	2	0	23	0	60	0	0	60	2	23	0	60	chr4_545486
chr4	545496	545496	8.3	8.3%_24r	chr4	545496	Thd1	EXON	1	21	2	0	24	0	79	0	0	79	2	24	0	79	chr4_545496
chr4	545541	545541	9.5	9.5%_21r	chr4	545541	Thd1	EXON	0	19	2	0	21	0	48	0	0	48	2	21	0	48	chr4_545541
chr4	545550	545550	19	19.0%_21r	chr4	545550	Thd1	EXON	0	17	4	0	21	0	66	0	0	66	4	21	0	66	chr4_545550
chr4	545684	545684	9.1	9.1%_22r	chr4	545684	Thd1	EXON	0	20	2	0	22	0	67	0	0	67	2	22	0	67	chr4_545684
chr4	545697	545697	20	20.0%_30r	chr4	545697	Thd1	EXON	0	24	6	0	30	0	63	0	0	63	6	30	0	63	chr4_545697
chr4	545721	545721	35.5	35.5%_31r	chr4	545721	Thd1	EXON	0	20	11	0	31	0	77	0	0	77	11	31	0	77	chr4_545721
chr4	545724	545724	10	10.0%_30r	chr4	545724	Thd1	EXON	0	27	3	0	30	0	76	0	1	77	3	30	0	77	chr4_545724
chr4	545796	545796	11.1	11.1%_36r	chr4	545796	Thd1	EXON	0	32	4	0	36	0	85	0	0	85	4	36	0	85	chr4_545796
chr4	545802	545802	15.2	15.2%_46r	chr4	545802	Thd1	EXON	0	39	7	0	46	0	90	0	0	90	7	46	0	90	chr4_545802
chr4	545858	545858	9.5	9.5%_21r	chr4	545858	Thd1	EXON	0	19	2	0	21	0	55	0	0	55	2	21	0	55	chr4_545858
chr4	545881	545881	30	30.0%_20r	chr4	545881	Thd1	EXON	0	14	6	0	20	0	81	0	0	81	6	20	0	81	chr4_545881
chr4	545893	545893	14.7	14.7%_34r	chr4	545893	Thd1	EXON	0	29	5	0	34	0	98	0	0	98	5	34	0	98	chr4_545893
chr4	545895	545895	11.8	11.8%_34r	chr4	545895	Thd1	EXON	0	30	4	0	34	0	97	0	0	97	4	34	0	97	chr4_545895
chr4	545906	545906	7.7	7.7%_26r	chr4	545906	Thd1	EXON	0	24	2	0	26	0	95	0	0	95	2	26	0	95	chr4_545906
chr4	545926	545926	9.5	9.5%_42r	chr4	545926	Thd1	EXON	0	38	4	0	42	0	134	0	0	134	4	42	0	134	chr4_545926
chr4	545936	545936	7.1	7.1%_28r	chr4	545936	Thd1	EXON	1	25	2	0	28	1	109	0	0	110	2	28	0	110	chr4_545936
chr4	545961	545961	7.1	7.1%_28r	chr4	545961	Thd1	EXON	0	26	2	0	28	0	81	0	0	81	2	28	0	81	chr4_545961
chr4	546044	546044	8	8.0%_25r	chr4	546044	Thd1	EXON	0	23	2	0	25	0	46	0	1	47	2	25	0	47	chr4_546044
chr4	546097	546097	10.7	10.7%_28r	chr4	546097	Thd1	EXON	0	25	3	0	28	0	78	0	0	78	3	28	0	78	chr4_546097
chr4	546109	546109	7.7	7.7%_26r	chr4	546109	Thd1	EXON	0	24	2	0	26	0	81	0	0	81	2	26	0	81	chr4_546109
chr4	546147	546147	13	13.0%_23r	chr4	546147	Thd1	EXON	0	20	3	0	23	0	95	0	0	95	3	23	0	95	chr4_546147
chr4	546168	546168	9.1	9.1%_33r	chr4	546168	Thd1	EXON	0	30	3	0	33	0	118	0	0	118	3	33	0	118	chr4_546168
chr4	546169	546169	6.2	6.2%_32r	chr4	546169	Thd1	EXON	0	30	2	0	32	0	106	0	0	106	2	32	0	106	chr4_546169
chr4	546181	546181	14.3	14.3%_35r	chr4	546181	Thd1	EXON	0	30	5	0	35	0	91	0	0	91	5	35	0	91	chr4_546181
chr4	546198	546198	6.2	6.2%_32r	chr4	546198	Thd1	EXON	0	30	2	0	32	0	104	0	0	104	2	32	0	104	chr4_546198
chr4	546232	546232	9.4	9.4%_32r	chr4	546232	Thd1	EXON	0	29	3	0	32	0	137	0	0	137	3	32	0	137	chr4_546232
chr4	546277	546277	13	13.0%_23r	chr4	546277	Thd1	EXON	0	19	3	1	23	0	46	0	0	46	3	23	0	46	chr4_546277
chr4	546337	546337	7.4	7.4%_27r	chr4	546337	Thd1	EXON	0	25	2	0	27	0	80	0	0	80	2	27	0	80	chr4_546337
chr4	546353	546353	19	19.0%_21r	chr4	546353	Thd1	EXON	0	17	4	0	21	0	63	0	0	63	4	21	0	63	chr4_546353
chr4	546485	546485	8	8.0%_25r	chr4	546485	Thd1	EXON	0	23	2	0	25	0	88	0	0	88	2	25	0	88	chr4_546485
chr4	546491	546491	8.3	8.3%_24r	chr4	546491	Thd1	EXON	0	22	2	0	24	0	91	0	1	92	2	24	0	92	chr4_546491
chr4	547873	547873	42.9	42.9%_21r	chr4	547873	Thd1	EXON	0	12	9	0	21	0	80	0	0	80	9	21	0	80	chr4_547873
chr4	549465	549465	20	20.0%_20r	chr4	549465	Thd1	EXON	0	16	4	0	20	0	82	0	0	82	4	20	0	82	chr4_549465
chr4	552838	552838	15	15.0%_20r	chr4	552838	Thd1	EXON	0	17	3	0	20	0	89	0	0	89	3	20	0	89	chr4_552838
chr4	552944	552944	24	24.0%_25r	chr4	552944	Thd1	EXON	0	19	6	0	25	0	47	0	0	47	6	25	0	47	chr4_552944
chr4	552948	552948	8	8.0%_25r	chr4	552948	Thd1	EXON	0	23	2	0	25	0	52	0	0	52	2	25	0	52	chr4_552948
chr4	552955	552955	34.6	34.6%_26r	chr4	552955	Thd1	EXON	0	17	9	0	26	0	74	0	0	74	9	26	0	74	chr4_552955
chr4	552965	552965	28.6	28.6%_21r	chr4	552965	Thd1	EXON	0	15	6	0	21	0	84	0	0	84	6	21	0	84	chr4_552965
chr4	553040	553040	11.1	11.1%_27r	chr4	553040	Thd1	EXON	0	24	3	0	27	0	99	0	0	99	3	27	0	99	chr4_553040
chr4	553042	553042	6.9	6.9%_29r	chr4	553042	Thd1	EXON	0	27	2	0	29	0	99	0	0	99	2	29	0	99	chr4_553042
chr4	553180	553180	15.4	15.4%_26r	chr4	553180	Thd1	EXON	0	22	4	0	26	0	90	0	0	90	4	26	0	90	chr4_553180
chr4	553185	553185	13.3	13.3%_30r	chr4	553185	Thd1	EXON	0	26	4	0	30	0	105	0	0	105	4	30	0	105	chr4_553185
chr4	553194	553194	7.7	7.7%_39r	chr4	553194	Thd1	EXON	1	34	3	1	39	0	103	0	0	103	3	39	0	103	chr4_553194
chr4	553197	553197	7.9	7.9%_38r	chr4	553197	Thd1	EXON	0	35	3	0	38	0	88	0	0	88	3	38	0	88	chr4_553197
chr4	553215	553215	16.7	16.7%_30r	chr4	553215	Thd1	EXON	0	25	5	0	30	0	70	0	0	70	5	30	0	70	chr4_553215
chr4	553218	553218	10.7	10.7%_28r	chr4	553218	Thd1	EXON	0	25	3	0	28	0	68	0	0	68	3	28	0	68	chr4_553218
chr4	553259	553259	8.3	8.3%_24r	chr4	553259	Thd1	EXON	0	22	2	0	24	0	87	0	0	87	2	24	0	87	chr4_553259
chr4	553269	553269	31.8	31.8%_22r	chr4	553269	Thd1	EXON	0	15	7	0	22	0	76	0	0	76	7	22	0	76	chr4_553269
chr4	553331	553331	13	13.0%_23r	chr4	553331	Thd1	EXON	0	20	3	0	23	0	71	0	0	71	3	23	0	71	chr4_553331
chr4	553345	553345	9.5	9.5%_21r	chr4	553345	Thd1	EXON	0	19	2	0	21	0	67	0	0	67	2	21	0	67	chr4_553345
chr4	553358	553358	71.4	71.4%_21r	chr4	553358	Thd1	EXON	0	6	15	0	21	0	82	0	0	82	15	21	0	82	chr4_553358
chr4	553388	553388	9.5	9.5%_21r	chr4	553388	Thd1	EXON	0	19	2	0	21	0	61	0	0	61	2	21	0	61	chr4_553388
chr4	553392	553392	13.6	13.6%_22r	chr4	553392	Thd1	EXON	0	19	3	0	22	0	66	0	0	66	3	22	0	66	chr4_553392
chr4	553395	553395	21.7	21.7%_23r	chr4	553395	Thd1	EXON	0	18	5	0	23	0	61	0	0	61	5	23	0	61	chr4_553395
chr4	553481	553481	8.7	8.7%_23r	chr4	553481	Thd1	EXON	0	21	2	0	23	0	74	0	0	74	2	23	0	74	chr4_553481
chr4	553653	553653	15	15.0%_20r	chr4	553653	Thd1	EXON	0	17	3	0	20	0	84	0	0	84	3	20	0	84	chr4_553653
chr4	557112	557112	14.8	14.8%_27r	chr4	557112	Thd1	INTRON	0	23	4	0	27	0	178	0	0	178	4	27	0	178	chr4_557112
chr4	557125	557125	7.7	7.7%_26r	chr4	557125	Thd1	INTRON	0	24	2	0	26	0	160	0	0	160	2	26	0	160	chr4_557125
chr4	557135	557135	6.9	6.9%_29r	chr4	557135	Thd1	INTRON	0	27	2	0	29	0	119	0	0	119	2	29	0	119	chr4_557135
chr4	557161	557161	12.5	12.5%_24r	chr4	557161	Thd1	INTRON	0	21	3	0	24	0	66	0	0	66	3	24	0	66	chr4_557161
chr4	557176	557176	8.3	8.3%_24r	chr4	557176	Thd1	INTRON	0	22	2	0	24	0	66	0	0	66	2	24	0	66	chr4_557176
chr4	557191	557191	11.1	11.1%_27r	chr4	557191	Thd1	INTRON	0	24	3	0	27	0	79	0	0	79	3	27	0	79	chr4_557191
chr4	557196	557196	37.5	37.5%_24r	chr4	557196	Thd1	INTRON	0	15	9	0	24	0	70	0	0	70	9	24	0	70	chr4_557196
chr4	557197	557197	12.5	12.5%_24r	chr4	557197	Thd1	INTRON	0	21	3	0	24	0	71	0	0	71	3	24	0	71	chr4_557197
chr4	557206	557206	19	19.0%_21r	chr4	557206	Thd1	INTRON	0	17	4	0	21	0	89	0	0	89	4	21	0	89	chr4_557206
chr4	557228	557228	6.3	6.3%_63r	chr4	557228	Thd1	INTRON	0	59	4	0	63	1	310	0	0	311	4	63	0	311	chr4_557228
chr4	557253	557253	42.2	42.2%_45r	chr4	557253	Thd1	INTRON	0	26	19	0	45	0	330	0	0	330	19	45	0	330	chr4_557253
chr4	557256	557256	37.8	37.8%_45r	chr4	557256	Thd1	INTRON	0	28	17	0	45	0	306	1	0	307	17	45	1	307	chr4_557256
chr4	557524	557524	23.4	23.4%_47r	chr4	557524	Thd1	EXON	0	36	11	0	47	0	217	0	0	217	11	47	0	217	chr4_557524
chr4	557530	557530	6.7	6.7%_45r	chr4	557530	Thd1	EXON	0	42	3	0	45	0	250	0	0	250	3	45	0	250	chr4_557530
chr4	557539	557539	10	10.0%_40r	chr4	557539	Thd1	EXON	0	36	4	0	40	0	212	0	0	212	4	40	0	212	chr4_557539
chr4	557542	557542	9.1	9.1%_44r	chr4	557542	Thd1	EXON	0	40	4	0	44	0	241	0	0	241	4	44	0	241	chr4_557542
chr4	557598	557598	10.7	10.7%_56r	chr4	557598	Thd1	EXON	0	50	6	0	56	0	350	0	0	350	6	56	0	350	chr4_557598
chr4	557614	557614	6.9	6.9%_87r	chr4	557614	Thd1	EXON	0	81	6	0	87	0	454	0	0	454	6	87	0	454	chr4_557614
chr4	557626	557626	10.8	10.8%_65r	chr4	557626	Thd1	EXON	0	58	7	0	65	0	329	0	0	329	7	65	0	329	chr4_557626
chr4	557633	557633	75	75.0%_56r	chr4	557633	Thd1	EXON	0	14	42	0	56	0	266	1	1	268	42	56	1	268	chr4_557633
chr4	557681	557681	9.4	9.4%_32r	chr4	557681	Thd1	EXON	0	29	3	0	32	0	149	0	0	149	3	32	0	149	chr4_557681
chr4	557685	557685	16.7	16.7%_30r	chr4	557685	Thd1	EXON	0	25	5	0	30	0	124	0	0	124	5	30	0	124	chr4_557685
chr4	557702	557702	11.1	11.1%_27r	chr4	557702	Thd1	EXON	0	24	3	0	27	0	104	0	0	104	3	27	0	104	chr4_557702
chr4	557716	557716	16.1	16.1%_31r	chr4	557716	Thd1	EXON	0	26	5	0	31	0	89	0	1	90	5	31	0	90	chr4_557716
chr4	557717	557717	9.7	9.7%_31r	chr4	557717	Thd1	EXON	0	28	3	0	31	0	98	0	0	98	3	31	0	98	chr4_557717
chr4	557777	557777	33.3	33.3%_21r	chr4	557777	Thd1	EXON	0	14	7	0	21	0	114	0	0	114	7	21	0	114	chr4_557777
chr4	557788	557788	11.5	11.5%_26r	chr4	557788	Thd1	EXON	0	23	3	0	26	0	132	0	0	132	3	26	0	132	chr4_557788
chr4	557791	557791	7.7	7.7%_26r	chr4	557791	Thd1	EXON	0	24	2	0	26	0	119	0	0	119	2	26	0	119	chr4_557791
chr4	557797	557797	13.6	13.6%_22r	chr4	557797	Thd1	EXON	0	19	3	0	22	0	122	0	0	122	3	22	0	122	chr4_557797
chr4	460199	460199	9.1	9.1%_33r	chr4	460199	CR45126	EXON	30	0	0	3	33	51	0	0	0	51	3	33	0	51	chr4_460199
chr4	460599	460599	6.2	6.2%_65r	chr4	460599	CR45126	EXON	61	0	0	4	65	74	0	0	0	74	4	65	0	74	chr4_460599
chr4	460628	460628	9.3	9.3%_54r	chr4	460628	CR45126	EXON	49	0	0	5	54	50	0	0	0	50	5	54	0	50	chr4_460628
chr4	460793	460793	12.5	12.5%_24r	chr4	460793	CR45126	EXON	21	0	0	3	24	39	0	0	0	39	3	24	0	39	chr4_460793
chr4	460953	460953	14.3	14.3%_28r	chr4	460953	CR45126	EXON	24	0	0	4	28	31	0	0	0	31	4	28	0	31	chr4_460953
chr4	460979	460979	9.1	9.1%_22r	chr4	460979	CR45126	EXON	20	0	0	2	22	39	0	0	0	39	2	22	0	39	chr4_460979
chr4	460994	460994	25	25.0%_20r	chr4	460994	CR45126	EXON	15	0	0	5	20	47	0	0	0	47	5	20	0	47	chr4_460994
chr4	460998	460998	15	15.0%_20r	chr4	460998	CR45126	EXON	17	0	0	3	20	44	0	0	0	44	3	20	0	44	chr4_460998
chr4	461034	461034	10	10.0%_30r	chr4	461034	CR45126	EXON	27	0	0	3	30	55	0	0	0	55	3	30	0	55	chr4_461034
chr4	154737	154737	7.4	7.4%_27r	chr4	154737	CG31997	EXON	0	25	2	0	27	0	26	0	0	26	2	27	0	26	chr4_154737
chr4	154738	154738	11.1	11.1%_27r	chr4	154738	CG31997	EXON	0	24	3	0	27	0	26	0	0	26	3	27	0	26	chr4_154738
chr4	154745	154745	6.9	6.9%_29r	chr4	154745	CG31997	EXON	0	27	2	0	29	0	53	0	0	53	2	29	0	53	chr4_154745
chr4	154807	154807	23.6	23.6%_55r	chr4	154807	CG31997	EXON	0	42	13	0	55	0	84	0	0	84	13	55	0	84	chr4_154807
chr4	154824	154824	10	10.0%_70r	chr4	154824	CG31997	EXON	0	63	7	0	70	0	92	0	0	92	7	70	0	92	chr4_154824
chr4	154831	154831	7	7.0%_71r	chr4	154831	CG31997	EXON	0	66	5	0	71	0	113	0	1	114	5	71	0	114	chr4_154831
chr4	154832	154832	31	31.0%_71r	chr4	154832	CG31997	EXON	0	49	22	0	71	0	112	0	0	112	22	71	0	112	chr4_154832
chr4	154850	154850	21	21.0%_105r	chr4	154850	CG31997	EXON	0	83	22	0	105	0	153	0	1	154	22	105	0	154	chr4_154850
chr4	154909	154909	11.2	11.2%_89r	chr4	154909	CG31997	EXON	0	79	10	0	89	0	118	0	0	118	10	89	0	118	chr4_154909
chr4	154910	154910	11.1	11.1%_90r	chr4	154910	CG31997	EXON	0	80	10	0	90	0	112	0	0	112	10	90	0	112	chr4_154910
chr4	154914	154914	6.3	6.3%_79r	chr4	154914	CG31997	EXON	0	74	5	0	79	1	106	0	0	107	5	79	0	107	chr4_154914
chr4	154915	154915	15.5	15.5%_84r	chr4	154915	CG31997	EXON	0	71	13	0	84	0	103	0	0	103	13	84	0	103	chr4_154915
chr4	154947	154947	8.7	8.7%_92r	chr4	154947	CG31997	EXON	0	84	8	0	92	0	85	0	0	85	8	92	0	85	chr4_154947
chr4	155045	155045	7.6	7.6%_66r	chr4	155045	CG31997	EXON	0	61	5	0	66	0	92	0	0	92	5	66	0	92	chr4_155045
chr4	155047	155047	13.4	13.4%_67r	chr4	155047	CG31997	EXON	0	58	9	0	67	0	91	0	0	91	9	67	0	91	chr4_155047
chr4	155048	155048	28.8	28.8%_66r	chr4	155048	CG31997	EXON	0	47	19	0	66	0	90	0	0	90	19	66	0	90	chr4_155048
chr4	155093	155093	18.8	18.8%_96r	chr4	155093	CG31997	EXON	0	78	18	0	96	0	121	0	0	121	18	96	0	121	chr4_155093
chr4	155766	155766	6.1	6.1%_66r	chr4	155766	CG31997	EXON	0	62	4	0	66	0	55	0	0	55	4	66	0	55	chr4_155766
chr4	155822	155822	20	20.0%_85r	chr4	155822	CG31997	EXON	0	68	17	0	85	0	76	0	0	76	17	85	0	76	chr4_155822
chr4	155824	155824	6.1	6.1%_82r	chr4	155824	CG31997	EXON	0	77	5	0	82	0	67	0	0	67	5	82	0	67	chr4_155824
chr4	155831	155831	6.1	6.1%_98r	chr4	155831	CG31997	EXON	0	92	6	0	98	0	96	0	0	96	6	98	0	96	chr4_155831
chr4	155833	155833	8.4	8.4%_95r	chr4	155833	CG31997	EXON	0	87	8	0	95	0	86	0	0	86	8	95	0	86	chr4_155833
chr4	155904	155904	7.5	7.5%_53r	chr4	155904	CG31997	EXON	0	49	4	0	53	0	85	0	0	85	4	53	0	85	chr4_155904
chr4	155907	155907	11.5	11.5%_52r	chr4	155907	CG31997	EXON	1	45	6	0	52	0	93	0	0	93	6	52	0	93	chr4_155907
chr4	155929	155929	9.8	9.8%_41r	chr4	155929	CG31997	EXON	0	37	4	0	41	0	90	0	0	90	4	41	0	90	chr4_155929
chr4	155977	155977	7.7	7.7%_26r	chr4	155977	CG31997	EXON	0	24	2	0	26	0	42	0	0	42	2	26	0	42	chr4_155977
chr4	155983	155983	8	8.0%_25r	chr4	155983	CG31997	EXON	0	23	2	0	25	0	40	0	0	40	2	25	0	40	chr4_155983
chr4	316438	316438	9.5	9.5%_21r	chr4	316438	CG32850	EXON	19	0	0	2	21	100	0	0	0	100	2	21	0	100	chr4_316438
chr4	316464	316464	13	13.0%_23r	chr4	316464	CG32850	EXON	20	0	0	3	23	134	0	0	0	134	3	23	0	134	chr4_316464
chr4	319450	319450	12.1	12.1%_33r	chr4	319450	CG32850	EXON	29	0	0	4	33	264	0	0	0	264	4	33	0	264	chr4_319450
chr4	319456	319456	12.5	12.5%_40r	chr4	319456	CG32850	EXON	35	0	0	5	40	284	0	0	0	284	5	40	0	284	chr4_319456
chr4	319466	319466	20	20.0%_35r	chr4	319466	CG32850	EXON	28	0	0	7	35	255	0	0	0	255	7	35	0	255	chr4_319466
chr4	319469	319469	6.1	6.1%_33r	chr4	319469	CG32850	EXON	31	0	0	2	33	250	0	0	0	250	2	33	0	250	chr4_319469
chr4	319500	319500	12.8	12.8%_39r	chr4	319500	CG32850	EXON	34	0	0	5	39	213	0	0	0	213	5	39	0	213	chr4_319500
chr4	319518	319518	6.4	6.4%_47r	chr4	319518	CG32850	EXON	44	0	0	3	47	229	1	0	0	230	3	47	0	230	chr4_319518
chr4	319529	319529	9.5	9.5%_42r	chr4	319529	CG32850	EXON	38	0	0	4	42	179	0	0	0	179	4	42	0	179	chr4_319529
chr4	319553	319553	30.8	30.8%_26r	chr4	319553	CG32850	EXON	18	0	0	8	26	159	0	0	0	159	8	26	0	159	chr4_319553
chr4	319590	319590	7.5	7.5%_40r	chr4	319590	CG32850	EXON	37	0	0	3	40	257	0	0	0	257	3	40	0	257	chr4_319590
chr4	319592	319592	10.5	10.5%_38r	chr4	319592	CG32850	EXON	34	0	0	4	38	260	0	0	0	260	4	38	0	260	chr4_319592
chr4	319596	319596	25	25.0%_36r	chr4	319596	CG32850	EXON	27	0	0	9	36	260	0	0	0	260	9	36	0	260	chr4_319596
chr4	319598	319598	13.5	13.5%_37r	chr4	319598	CG32850	EXON	32	0	0	5	37	260	0	0	0	260	5	37	0	260	chr4_319598
chr4	319600	319600	16.7	16.7%_36r	chr4	319600	CG32850	EXON	30	0	0	6	36	246	0	1	0	248	6	36	0	248	chr4_319600
chr4	319615	319615	9.8	9.8%_41r	chr4	319615	CG32850	EXON	37	0	0	4	41	251	0	1	0	252	4	41	0	252	chr4_319615
chr4	319659	319659	12.7	12.7%_55r	chr4	319659	CG32850	EXON	48	0	0	7	55	343	1	0	0	344	7	55	0	344	chr4_319659
chr4	319660	319660	10.7	10.7%_56r	chr4	319660	CG32850	EXON	50	0	0	6	56	346	0	0	0	346	6	56	0	346	chr4_319660
chr4	319670	319670	10.2	10.2%_59r	chr4	319670	CG32850	EXON	53	0	0	6	59	391	0	0	0	391	6	59	0	391	chr4_319670
chr4	319690	319690	13	13.0%_54r	chr4	319690	CG32850	EXON	47	0	0	7	54	395	0	0	1	396	7	54	1	396	chr4_319690
chr4	319699	319699	25.6	25.6%_43r	chr4	319699	CG32850	EXON	32	0	0	11	43	374	0	0	0	374	11	43	0	374	chr4_319699
chr4	319704	319704	7.4	7.4%_54r	chr4	319704	CG32850	EXON	50	0	0	4	54	373	1	0	0	374	4	54	0	374	chr4_319704
chr4	319712	319712	8.2	8.2%_73r	chr4	319712	CG32850	EXON	67	0	0	6	73	402	0	0	0	402	6	73	0	402	chr4_319712
chr4	319731	319731	11.8	11.8%_51r	chr4	319731	CG32850	EXON	45	0	0	6	51	288	0	0	0	288	6	51	0	288	chr4_319731
chr4	319736	319736	20.8	20.8%_53r	chr4	319736	CG32850	EXON	42	0	0	11	53	296	0	0	0	296	11	53	0	296	chr4_319736
chr4	319754	319754	29.1	29.1%_55r	chr4	319754	CG32850	EXON	38	0	1	16	55	263	0	0	0	263	16	55	0	263	chr4_319754
chr4	319779	319779	11.9	11.9%_42r	chr4	319779	CG32850	EXON	37	0	0	5	42	186	0	0	0	186	5	42	0	186	chr4_319779
chr4	319790	319790	6.5	6.5%_46r	chr4	319790	CG32850	EXON	43	0	0	3	46	196	0	0	0	196	3	46	0	196	chr4_319790
chr4	319851	319851	9.4	9.4%_32r	chr4	319851	CG32850	EXON	29	0	0	3	32	182	0	0	0	182	3	32	0	182	chr4_319851
chr4	319852	319852	9.7	9.7%_31r	chr4	319852	CG32850	EXON	28	0	0	3	31	182	0	1	0	183	3	31	0	183	chr4_319852
chr4	319854	319854	6.9	6.9%_29r	chr4	319854	CG32850	EXON	27	0	0	2	29	178	0	0	0	178	2	29	0	178	chr4_319854
chr4	319856	319856	9.1	9.1%_33r	chr4	319856	CG32850	EXON	30	0	0	3	33	207	0	0	0	207	3	33	0	207	chr4_319856
chr4	319857	319857	12.9	12.9%_31r	chr4	319857	CG32850	EXON	27	0	0	4	31	207	1	0	0	208	4	31	0	208	chr4_319857
chr4	319876	319876	6.1	6.1%_33r	chr4	319876	CG32850	EXON	31	0	0	2	33	219	0	0	0	219	2	33	0	219	chr4_319876
chr4	319877	319877	8.6	8.6%_35r	chr4	319877	CG32850	EXON	32	0	0	3	35	222	0	0	0	222	3	35	0	222	chr4_319877
chr4	319878	319878	8.6	8.6%_35r	chr4	319878	CG32850	EXON	32	0	0	3	35	228	0	0	0	228	3	35	0	228	chr4_319878
chr4	319935	319935	47.8	47.8%_23r	chr4	319935	CG32850	EXON	12	0	0	11	23	124	0	0	0	124	11	23	0	124	chr4_319935
chr4	319938	319938	19.2	19.2%_26r	chr4	319938	CG32850	EXON	21	0	0	5	26	122	0	0	0	122	5	26	0	122	chr4_319938
chr4	319944	319944	13.8	13.8%_29r	chr4	319944	CG32850	EXON	25	0	0	4	29	120	1	0	0	121	4	29	0	121	chr4_319944
chr4	319982	319982	7.7	7.7%_26r	chr4	319982	CG32850	EXON	24	0	0	2	26	108	0	0	0	108	2	26	0	108	chr4_319982
chr4	319983	319983	7.7	7.7%_26r	chr4	319983	CG32850	EXON	24	0	0	2	26	112	0	0	0	112	2	26	0	112	chr4_319983
chr4	319994	319994	6.9	6.9%_29r	chr4	319994	CG32850	EXON	27	0	0	2	29	151	0	0	0	151	2	29	0	151	chr4_319994
chr4	320000	320000	6.9	6.9%_29r	chr4	320000	CG32850	EXON	27	0	0	2	29	125	3	0	0	128	2	29	0	128	chr4_320000
chr4	320001	320001	7.4	7.4%_27r	chr4	320001	CG32850	EXON	25	0	0	2	27	126	0	0	0	126	2	27	0	126	chr4_320001
chr4	198353	198353	9.1	9.1%_22r	chr4	198353	CG31998	EXON	0	20	2	0	22	0	47	0	0	47	2	22	0	47	chr4_198353
chr4	199585	199585	18.2	18.2%_22r	chr4	199585	CG31998	EXON	0	18	4	0	22	0	43	0	0	43	4	22	0	43	chr4_199585
chr4	201060	201060	9.5	9.5%_21r	chr4	201060	CG31998	EXON	0	19	2	0	21	0	41	0	0	41	2	21	0	41	chr4_201060
chr4	201117	201117	21.4	21.4%_28r	chr4	201117	CG31998	EXON	0	22	6	0	28	0	42	0	0	42	6	28	0	42	chr4_201117
chr4	201128	201128	7.7	7.7%_26r	chr4	201128	CG31998	EXON	0	24	2	0	26	0	37	0	0	37	2	26	0	37	chr4_201128
chr4	201159	201159	8.3	8.3%_24r	chr4	201159	CG31998	EXON	0	22	2	0	24	0	40	0	0	40	2	24	0	40	chr4_201159
chr4	201171	201171	30	30.0%_30r	chr4	201171	CG31998	EXON	0	21	9	0	30	0	42	0	0	42	9	30	0	42	chr4_201171
chr4	201192	201192	24	24.0%_25r	chr4	201192	CG31998	EXON	0	19	6	0	25	0	53	0	0	53	6	25	0	53	chr4_201192
chr4	201199	201199	17.2	17.2%_29r	chr4	201199	CG31998	EXON	0	24	5	0	29	0	48	0	0	48	5	29	0	48	chr4_201199
chr4	201205	201205	6.1	6.1%_33r	chr4	201205	CG31998	EXON	0	31	2	0	33	0	56	0	0	56	2	33	0	56	chr4_201205
chr4	201244	201244	30.8	30.8%_26r	chr4	201244	CG31998	EXON	0	18	8	0	26	0	40	0	0	40	8	26	0	40	chr4_201244
chr4	201263	201263	12.5	12.5%_32r	chr4	201263	CG31998	EXON	0	28	4	0	32	0	38	0	0	38	4	32	0	38	chr4_201263
chr4	201265	201265	6.9	6.9%_29r	chr4	201265	CG31998	EXON	0	27	2	0	29	0	29	0	0	29	2	29	0	29	chr4_201265
chr4	201308	201308	9.3	9.3%_43r	chr4	201308	CG31998	EXON	0	39	4	0	43	0	84	0	0	84	4	43	0	84	chr4_201308
chr4	201320	201320	9.7	9.7%_31r	chr4	201320	CG31998	EXON	0	28	3	0	31	0	75	0	1	76	3	31	0	76	chr4_201320
chr4	201492	201492	25.6	25.6%_43r	chr4	201492	CG31998	EXON	0	32	11	0	43	0	73	0	0	73	11	43	0	73	chr4_201492
chr4	201512	201512	30.8	30.8%_26r	chr4	201512	CG31998	EXON	0	18	8	0	26	0	59	0	0	59	8	26	0	59	chr4_201512
chr4	201513	201513	11.1	11.1%_27r	chr4	201513	CG31998	EXON	0	24	3	0	27	0	54	0	0	54	3	27	0	54	chr4_201513
chr4	201524	201524	12.5	12.5%_32r	chr4	201524	CG31998	EXON	0	27	4	1	32	0	49	0	0	49	4	32	0	49	chr4_201524
chr4	201552	201552	6.1	6.1%_33r	chr4	201552	CG31998	EXON	0	31	2	0	33	0	48	0	0	48	2	33	0	48	chr4_201552
chr4	201612	201612	6.5	6.5%_31r	chr4	201612	CG31998	EXON	0	29	2	0	31	0	58	0	0	58	2	31	0	58	chr4_201612
chr4	201613	201613	6.2	6.2%_32r	chr4	201613	CG31998	EXON	0	30	2	0	32	0	59	0	0	59	2	32	0	59	chr4_201613
chr4	201640	201640	14.6	14.6%_41r	chr4	201640	CG31998	EXON	0	35	6	0	41	0	69	0	0	69	6	41	0	69	chr4_201640
chr4	204021	204021	10.8	10.8%_37r	chr4	204021	CG31998	EXON	0	33	4	0	37	0	56	0	0	56	4	37	0	56	chr4_204021
chr4	204028	204028	16.2	16.2%_37r	chr4	204028	CG31998	EXON	0	31	6	0	37	0	55	0	0	55	6	37	0	55	chr4_204028
chr4	204047	204047	11.8	11.8%_34r	chr4	204047	CG31998	EXON	0	30	4	0	34	0	69	0	0	69	4	34	0	69	chr4_204047
chr4	204096	204096	10.7	10.7%_28r	chr4	204096	CG31998	EXON	1	24	3	0	28	0	85	0	0	85	3	28	0	85	chr4_204096
chr4	204115	204115	12	12.0%_25r	chr4	204115	CG31998	EXON	0	22	3	0	25	0	73	0	0	73	3	25	0	73	chr4_204115
chr4	204147	204147	6.7	6.7%_30r	chr4	204147	CG31998	EXON	0	28	2	0	30	0	62	0	0	62	2	30	0	62	chr4_204147
chr4	204170	204170	8	8.0%_25r	chr4	204170	CG31998	EXON	0	23	2	0	25	0	59	0	0	59	2	25	0	59	chr4_204170
chr4	204172	204172	11.5	11.5%_26r	chr4	204172	CG31998	EXON	0	23	3	0	26	0	48	0	0	48	3	26	0	48	chr4_204172
chr4	204177	204177	6.1	6.1%_33r	chr4	204177	CG31998	EXON	0	31	2	0	33	0	47	0	0	47	2	33	0	47	chr4_204177
chr4	204185	204185	13.3	13.3%_30r	chr4	204185	CG31998	EXON	0	26	4	0	30	0	45	0	0	45	4	30	0	45	chr4_204185
chr4	204187	204187	9.7	9.7%_31r	chr4	204187	CG31998	EXON	0	28	3	0	31	0	47	0	1	48	3	31	0	48	chr4_204187
chr4	204191	204191	7.1	7.1%_28r	chr4	204191	CG31998	EXON	0	26	2	0	28	0	52	0	0	52	2	28	0	52	chr4_204191
chr4	204202	204202	13.3	13.3%_30r	chr4	204202	CG31998	EXON	0	26	4	0	30	0	44	0	0	44	4	30	0	44	chr4_204202
chr4	204264	204264	7.4	7.4%_27r	chr4	204264	CG31998	EXON	0	25	2	0	27	0	60	0	0	60	2	27	0	60	chr4_204264
chr4	204389	204389	24.2	24.2%_33r	chr4	204389	CG31998	EXON	0	25	8	0	33	0	79	0	0	79	8	33	0	79	chr4_204389
chr4	204394	204394	21.4	21.4%_28r	chr4	204394	CG31998	EXON	0	22	6	0	28	0	72	0	0	72	6	28	0	72	chr4_204394
chr4	204401	204401	10	10.0%_20r	chr4	204401	CG31998	EXON	0	18	2	0	20	0	68	0	0	68	2	20	0	68	chr4_204401
chr4	204404	204404	10	10.0%_20r	chr4	204404	CG31998	EXON	0	18	2	0	20	0	61	0	0	61	2	20	0	61	chr4_204404
chr4	204431	204431	13	13.0%_23r	chr4	204431	CG31998	EXON	0	20	3	0	23	0	78	0	0	78	3	23	0	78	chr4_204431
chr4	204447	204447	15.6	15.6%_32r	chr4	204447	CG31998	EXON	0	27	5	0	32	0	89	0	0	89	5	32	0	89	chr4_204447
chr4	204450	204450	6.2	6.2%_32r	chr4	204450	CG31998	EXON	0	30	2	0	32	0	94	0	0	94	2	32	0	94	chr4_204450
chr4	204483	204483	10	10.0%_30r	chr4	204483	CG31998	EXON	0	27	3	0	30	0	97	0	0	97	3	30	0	97	chr4_204483
chr4	204486	204486	13.3	13.3%_30r	chr4	204486	CG31998	EXON	0	26	4	0	30	1	83	0	0	84	4	30	0	84	chr4_204486
chr4	204498	204498	12.1	12.1%_33r	chr4	204498	CG31998	EXON	0	29	4	0	33	0	94	0	0	94	4	33	0	94	chr4_204498
chr4	204703	204703	8.3	8.3%_24r	chr4	204703	CG31998	EXON	0	22	2	0	24	0	58	0	0	58	2	24	0	58	chr4_204703
chr4	204768	204768	6.9	6.9%_29r	chr4	204768	CG31998	EXON	0	27	2	0	29	0	64	0	0	64	2	29	0	64	chr4_204768
chr4	205742	205742	31.7	31.7%_41r	chr4	205742	CG31998	EXON	0	28	13	0	41	0	134	0	0	134	13	41	0	134	chr4_205742
chr4	205771	205771	24	24.0%_25r	chr4	205771	CG31998	EXON	0	19	6	0	25	0	74	0	0	74	6	25	0	74	chr4_205771
chr4	437043	437043	7	7.0%_43r	chr4	437043	lgs	EXON	0	40	3	0	43	0	74	0	1	75	3	43	0	75	chr4_437043
chr4	437066	437066	6.7	6.7%_45r	chr4	437066	lgs	EXON	0	42	3	0	45	0	84	0	0	84	3	45	0	84	chr4_437066
chr4	437067	437067	9.3	9.3%_43r	chr4	437067	lgs	EXON	0	39	4	0	43	0	83	0	0	83	4	43	0	83	chr4_437067
chr4	437068	437068	23.8	23.8%_42r	chr4	437068	lgs	EXON	0	32	10	0	42	0	80	0	0	80	10	42	0	80	chr4_437068
chr4	437098	437098	13.3	13.3%_45r	chr4	437098	lgs	EXON	0	39	6	0	45	0	104	0	0	104	6	45	0	104	chr4_437098
chr4	437111	437111	18.8	18.8%_32r	chr4	437111	lgs	EXON	0	26	6	0	32	0	95	0	0	95	6	32	0	95	chr4_437111
chr4	437115	437115	6.2	6.2%_32r	chr4	437115	lgs	EXON	0	30	2	0	32	0	70	0	0	70	2	32	0	70	chr4_437115
chr4	437121	437121	9.1	9.1%_33r	chr4	437121	lgs	EXON	0	30	3	0	33	0	70	0	0	70	3	33	0	70	chr4_437121
chr4	437193	437193	8.9	8.9%_45r	chr4	437193	lgs	EXON	0	41	4	0	45	0	95	0	0	95	4	45	0	95	chr4_437193
chr4	437204	437204	69	69.0%_42r	chr4	437204	lgs	EXON	0	13	29	0	42	0	89	0	0	89	29	42	0	89	chr4_437204
chr4	437207	437207	32.6	32.6%_43r	chr4	437207	lgs	EXON	0	29	14	0	43	0	89	0	0	89	14	43	0	89	chr4_437207
chr4	437220	437220	7.3	7.3%_41r	chr4	437220	lgs	EXON	0	38	3	0	41	0	58	0	0	58	3	41	0	58	chr4_437220
chr4	437247	437247	36.4	36.4%_22r	chr4	437247	lgs	EXON	0	14	8	0	22	0	74	0	0	74	8	22	0	74	chr4_437247
chr4	437248	437248	28.6	28.6%_21r	chr4	437248	lgs	EXON	0	15	6	0	21	0	70	0	0	70	6	21	0	70	chr4_437248
chr4	437293	437293	11.4	11.4%_35r	chr4	437293	lgs	EXON	0	31	4	0	35	0	93	0	0	93	4	35	0	93	chr4_437293
chr4	437297	437297	25.9	25.9%_27r	chr4	437297	lgs	EXON	0	20	7	0	27	0	86	0	0	86	7	27	0	86	chr4_437297
chr4	437313	437313	52	52.0%_25r	chr4	437313	lgs	EXON	0	12	13	0	25	0	95	0	0	95	13	25	0	95	chr4_437313
chr4	437314	437314	28	28.0%_25r	chr4	437314	lgs	EXON	0	18	7	0	25	0	100	0	0	100	7	25	0	100	chr4_437314
chr4	437316	437316	7.1	7.1%_28r	chr4	437316	lgs	EXON	0	26	2	0	28	0	104	0	0	104	2	28	0	104	chr4_437316
chr4	437317	437317	11.5	11.5%_26r	chr4	437317	lgs	EXON	0	23	3	0	26	0	98	0	0	98	3	26	0	98	chr4_437317
chr4	437318	437318	15.4	15.4%_26r	chr4	437318	lgs	EXON	0	22	4	0	26	0	100	0	0	100	4	26	0	100	chr4_437318
chr4	437333	437333	8.7	8.7%_46r	chr4	437333	lgs	EXON	0	42	4	0	46	0	117	0	0	117	4	46	0	117	chr4_437333
chr4	437345	437345	14.6	14.6%_41r	chr4	437345	lgs	EXON	0	35	6	0	41	0	132	0	0	132	6	41	0	132	chr4_437345
chr4	437348	437348	9.1	9.1%_44r	chr4	437348	lgs	EXON	0	40	4	0	44	1	135	0	0	136	4	44	0	136	chr4_437348
chr4	437385	437385	6.8	6.8%_44r	chr4	437385	lgs	EXON	0	41	3	0	44	1	83	0	1	85	3	44	0	85	chr4_437385
chr4	437386	437386	57.1	57.1%_42r	chr4	437386	lgs	EXON	0	18	24	0	42	0	84	0	0	84	24	42	0	84	chr4_437386
chr4	437387	437387	45.2	45.2%_42r	chr4	437387	lgs	EXON	0	23	19	0	42	0	84	0	0	84	19	42	0	84	chr4_437387
chr4	437389	437389	9.3	9.3%_43r	chr4	437389	lgs	EXON	0	39	4	0	43	0	85	0	1	86	4	43	0	86	chr4_437389
chr4	437393	437393	17.1	17.1%_41r	chr4	437393	lgs	EXON	0	34	7	0	41	0	83	0	0	83	7	41	0	83	chr4_437393
chr4	437444	437444	10.1	10.1%_69r	chr4	437444	lgs	EXON	0	62	7	0	69	0	96	0	0	96	7	69	0	96	chr4_437444
chr4	437450	437450	11.5	11.5%_61r	chr4	437450	lgs	EXON	0	54	7	0	61	0	101	0	0	101	7	61	0	101	chr4_437450
chr4	437453	437453	8.5	8.5%_59r	chr4	437453	lgs	EXON	0	54	5	0	59	0	102	0	0	102	5	59	0	102	chr4_437453
chr4	437459	437459	12.9	12.9%_62r	chr4	437459	lgs	EXON	0	54	8	0	62	0	114	0	0	114	8	62	0	114	chr4_437459
chr4	437480	437480	7.5	7.5%_80r	chr4	437480	lgs	EXON	1	73	6	0	80	0	113	0	2	115	6	80	0	115	chr4_437480
chr4	437496	437496	18.6	18.6%_86r	chr4	437496	lgs	EXON	0	70	16	0	86	0	119	0	1	120	16	86	0	120	chr4_437496
chr4	437510	437510	14.9	14.9%_74r	chr4	437510	lgs	EXON	0	63	11	0	74	0	113	0	0	113	11	74	0	113	chr4_437510
chr4	437520	437520	7.1	7.1%_98r	chr4	437520	lgs	EXON	0	91	7	0	98	0	110	0	0	110	7	98	0	110	chr4_437520
chr4	437528	437528	11.9	11.9%_84r	chr4	437528	lgs	EXON	0	74	10	0	84	0	110	0	0	110	10	84	0	110	chr4_437528
chr4	437563	437563	10.5	10.5%_57r	chr4	437563	lgs	EXON	0	51	6	0	57	0	67	0	0	67	6	57	0	67	chr4_437563
chr4	437571	437571	30.4	30.4%_56r	chr4	437571	lgs	EXON	0	39	17	0	56	0	74	0	0	74	17	56	0	74	chr4_437571
chr4	437592	437592	29.2	29.2%_65r	chr4	437592	lgs	EXON	0	46	19	0	65	0	89	0	0	89	19	65	0	89	chr4_437592
chr4	437598	437598	15.2	15.2%_46r	chr4	437598	lgs	EXON	1	38	7	0	46	0	75	0	0	75	7	46	0	75	chr4_437598
chr4	437619	437619	6.4	6.4%_47r	chr4	437619	lgs	EXON	0	44	3	0	47	0	110	0	0	110	3	47	0	110	chr4_437619
chr4	437620	437620	57.4	57.4%_47r	chr4	437620	lgs	EXON	0	20	27	0	47	0	110	0	0	110	27	47	0	110	chr4_437620
chr4	437657	437657	8.2	8.2%_49r	chr4	437657	lgs	EXON	0	45	4	0	49	0	77	0	0	77	4	49	0	77	chr4_437657
chr4	437668	437668	7.1	7.1%_56r	chr4	437668	lgs	EXON	0	52	4	0	56	0	40	0	0	40	4	56	0	40	chr4_437668
chr4	437680	437680	14	14.0%_43r	chr4	437680	lgs	EXON	0	37	6	0	43	0	31	0	0	31	6	43	0	31	chr4_437680
chr4	437687	437687	7.5	7.5%_40r	chr4	437687	lgs	EXON	0	37	3	0	40	0	29	0	0	29	3	40	0	29	chr4_437687
chr4	437717	437717	7.5	7.5%_40r	chr4	437717	lgs	EXON	0	36	3	1	40	0	29	0	1	30	3	40	0	30	chr4_437717
chr4	437779	437779	17.5	17.5%_40r	chr4	437779	lgs	EXON	0	33	7	0	40	0	38	0	0	38	7	40	0	38	chr4_437779
chr4	437795	437795	11.9	11.9%_42r	chr4	437795	lgs	EXON	0	37	5	0	42	0	35	0	0	35	5	42	0	35	chr4_437795
chr4	437823	437823	26.8	26.8%_41r	chr4	437823	lgs	EXON	0	30	11	0	41	0	19	0	0	19	11	41	0	19	chr4_437823
chr4	437894	437894	10.7	10.7%_28r	chr4	437894	lgs	EXON	0	25	3	0	28	0	21	0	0	21	3	28	0	21	chr4_437894
chr4	437895	437895	14.3	14.3%_28r	chr4	437895	lgs	EXON	0	24	4	0	28	0	22	0	0	22	4	28	0	22	chr4_437895
chr4	437902	437902	27.3	27.3%_22r	chr4	437902	lgs	EXON	1	15	6	0	22	0	19	0	0	19	6	22	0	19	chr4_437902
chr4	437934	437934	9.5	9.5%_21r	chr4	437934	lgs	EXON	0	19	2	0	21	0	22	0	0	22	2	21	0	22	chr4_437934
chr4	437939	437939	13	13.0%_23r	chr4	437939	lgs	EXON	0	20	3	0	23	0	26	0	0	26	3	23	0	26	chr4_437939
chr4	437941	437941	40.9	40.9%_22r	chr4	437941	lgs	EXON	1	12	9	0	22	0	28	0	0	28	9	22	0	28	chr4_437941
chr4	438013	438013	16.7	16.7%_24r	chr4	438013	lgs	EXON	0	20	4	0	24	0	32	0	0	32	4	24	0	32	chr4_438013
chr4	438024	438024	7.7	7.7%_26r	chr4	438024	lgs	EXON	0	24	2	0	26	1	29	0	0	30	2	26	0	30	chr4_438024
chr4	438041	438041	8.3	8.3%_24r	chr4	438041	lgs	EXON	0	22	2	0	24	0	23	0	0	23	2	24	0	23	chr4_438041
chr4	438042	438042	30.4	30.4%_23r	chr4	438042	lgs	EXON	0	16	7	0	23	0	24	0	0	24	7	23	0	24	chr4_438042
chr4	438053	438053	40.7	40.7%_27r	chr4	438053	lgs	EXON	0	16	11	0	27	0	24	0	0	24	11	27	0	24	chr4_438053
chr4	438054	438054	18.5	18.5%_27r	chr4	438054	lgs	EXON	0	22	5	0	27	0	23	0	0	23	5	27	0	23	chr4_438054
chr4	438067	438067	16	16.0%_25r	chr4	438067	lgs	EXON	0	21	4	0	25	0	18	0	0	18	4	25	0	18	chr4_438067
chr4	438089	438089	6.5	6.5%_31r	chr4	438089	lgs	EXON	0	29	2	0	31	0	19	0	0	19	2	31	0	19	chr4_438089
chr4	438100	438100	12.5	12.5%_24r	chr4	438100	lgs	EXON	0	21	3	0	24	0	16	0	0	16	3	24	0	16	chr4_438100
chr4	438104	438104	8.7	8.7%_23r	chr4	438104	lgs	EXON	0	21	2	0	23	0	15	0	0	15	2	23	0	15	chr4_438104
chr4	438121	438121	33.3	33.3%_24r	chr4	438121	lgs	EXON	0	16	8	0	24	0	16	0	0	16	8	24	0	16	chr4_438121
chr4	438190	438190	30	30.0%_20r	chr4	438190	lgs	EXON	0	14	6	0	20	0	18	0	0	18	6	20	0	18	chr4_438190
chr4	438234	438234	14.3	14.3%_21r	chr4	438234	lgs	EXON	0	18	3	0	21	0	20	0	0	20	3	21	0	20	chr4_438234
chr4	438243	438243	10	10.0%_20r	chr4	438243	lgs	EXON	0	18	2	0	20	0	23	0	0	23	2	20	0	23	chr4_438243
chr4	438245	438245	33.3	33.3%_21r	chr4	438245	lgs	EXON	0	14	7	0	21	0	23	0	0	23	7	21	0	23	chr4_438245
chr4	438279	438279	6.2	6.2%_32r	chr4	438279	lgs	EXON	0	30	2	0	32	0	37	0	0	37	2	32	0	37	chr4_438279
chr4	438281	438281	9.1	9.1%_33r	chr4	438281	lgs	EXON	0	30	3	0	33	0	36	0	0	36	3	33	0	36	chr4_438281
chr4	438296	438296	6.2	6.2%_32r	chr4	438296	lgs	EXON	0	30	2	0	32	0	37	0	0	37	2	32	0	37	chr4_438296
chr4	438351	438351	23.8	23.8%_21r	chr4	438351	lgs	EXON	0	16	5	0	21	0	37	0	1	38	5	21	0	38	chr4_438351
chr4	438365	438365	7.1	7.1%_28r	chr4	438365	lgs	EXON	0	25	2	1	28	0	25	0	0	25	2	28	0	25	chr4_438365
chr4	438378	438378	68.2	68.2%_22r	chr4	438378	lgs	EXON	0	7	15	0	22	0	20	0	0	20	15	22	0	20	chr4_438378
chr4	438442	438442	15	15.0%_20r	chr4	438442	lgs	EXON	0	17	3	0	20	0	19	0	0	20	3	20	0	20	chr4_438442
chr4	438443	438443	10	10.0%_20r	chr4	438443	lgs	EXON	0	18	2	0	20	0	21	0	0	21	2	20	0	21	chr4_438443
chr4	438610	438610	14.8	14.8%_27r	chr4	438610	lgs	EXON	0	23	4	0	27	0	15	0	0	15	4	27	0	15	chr4_438610
chr4	438636	438636	7.7	7.7%_26r	chr4	438636	lgs	EXON	0	24	2	0	26	0	14	0	0	14	2	26	0	14	chr4_438636
chr4	438640	438640	6.9	6.9%_29r	chr4	438640	lgs	EXON	0	27	2	0	29	0	23	0	0	23	2	29	0	23	chr4_438640
chr4	438646	438646	13.3	13.3%_30r	chr4	438646	lgs	EXON	0	26	4	0	30	0	21	0	0	22	4	30	0	22	chr4_438646
chr4	438655	438655	71.4	71.4%_21r	chr4	438655	lgs	EXON	0	6	15	0	21	0	26	0	0	26	15	21	0	26	chr4_438655
chr4	438901	438901	32	32.0%_25r	chr4	438901	lgs	EXON	0	17	8	0	25	0	21	0	0	21	8	25	0	21	chr4_438901
chr4	439638	439638	8	8.0%_25r	chr4	439638	lgs	EXON	0	23	2	0	25	0	11	0	0	11	2	25	0	11	chr4_439638
chr4	439642	439642	7.7	7.7%_26r	chr4	439642	lgs	EXON	0	24	2	0	26	0	11	0	0	11	2	26	0	11	chr4_439642
chr4	440711	440711	20.7	20.7%_29r	chr4	440711	lgs	EXON	0	23	6	0	29	0	26	0	0	26	6	29	0	26	chr4_440711
chr4	440724	440724	7.7	7.7%_26r	chr4	440724	lgs	EXON	0	24	2	0	26	0	31	0	0	31	2	26	0	31	chr4_440724
chr4	440916	440916	8.7	8.7%_23r	chr4	440916	lgs	EXON	0	21	2	0	23	0	21	0	0	21	2	23	0	21	chr4_440916
chr4	441278	441278	14.3	14.3%_21r	chr4	441278	lgs	EXON	0	18	3	0	21	0	10	0	0	10	3	21	0	10	chr4_441278
chr4	442280	442280	7.4	7.4%_27r	chr4	442280	lgs	EXON	0	25	2	0	27	0	12	0	0	12	2	27	0	12	chr4_442280
chr4	442285	442285	6.5	6.5%_31r	chr4	442285	lgs	EXON	0	29	2	0	31	0	15	0	0	15	2	31	0	15	chr4_442285
chr4	442304	442304	14.3	14.3%_28r	chr4	442304	lgs	EXON	0	24	4	0	28	0	37	0	0	37	4	28	0	37	chr4_442304
chr4	442307	442307	9.4	9.4%_32r	chr4	442307	lgs	EXON	0	29	3	0	32	0	43	0	0	43	3	32	0	43	chr4_442307
chr4	442324	442324	10.3	10.3%_29r	chr4	442324	lgs	EXON	0	26	3	0	29	0	25	0	0	25	3	29	0	25	chr4_442324
chr4	442330	442330	32.3	32.3%_31r	chr4	442330	lgs	EXON	0	21	10	0	31	0	32	0	0	32	10	31	0	32	chr4_442330
chr4	442384	442384	19	19.0%_21r	chr4	442384	lgs	EXON	0	17	4	0	21	0	21	0	0	21	4	21	0	21	chr4_442384
chr4	442385	442385	13	13.0%_23r	chr4	442385	lgs	EXON	0	20	3	0	23	0	21	0	0	21	3	23	0	21	chr4_442385
chr4	442893	442893	6.2	6.2%_32r	chr4	442893	lgs	EXON	0	30	2	0	32	0	27	0	0	27	2	32	0	27	chr4_442893
chr4	442957	442957	7.9	7.9%_38r	chr4	442957	lgs	EXON	0	34	3	1	38	0	29	0	0	29	3	38	0	29	chr4_442957
chr4	442960	442960	9.8	9.8%_41r	chr4	442960	lgs	EXON	0	37	4	0	41	0	29	0	0	29	4	41	0	29	chr4_442960
chr4	442985	442985	7.9	7.9%_38r	chr4	442985	lgs	EXON	0	35	3	0	38	0	18	0	0	18	3	38	0	18	chr4_442985
chr4	442997	442997	40	40.0%_30r	chr4	442997	lgs	EXON	0	18	12	0	30	0	15	0	0	15	12	30	0	15	chr4_442997
chr4	443008	443008	6.9	6.9%_29r	chr4	443008	lgs	EXON	0	27	2	0	29	0	21	0	0	21	2	29	0	21	chr4_443008
chr4	443017	443017	28.6	28.6%_21r	chr4	443017	lgs	EXON	0	15	6	0	21	0	24	0	0	24	6	21	0	24	chr4_443017
chr4	443059	443059	16.7	16.7%_24r	chr4	443059	lgs	EXON	0	20	4	0	24	0	35	0	0	35	4	24	0	35	chr4_443059
chr4	443072	443072	52.2	52.2%_23r	chr4	443072	lgs	EXON	0	11	12	0	23	0	47	0	0	47	12	23	0	47	chr4_443072
chr4	443093	443093	20.8	20.8%_24r	chr4	443093	lgs	EXON	0	19	5	0	24	0	34	0	0	34	5	24	0	34	chr4_443093
chr4	443116	443116	27.3	27.3%_22r	chr4	443116	lgs	EXON	0	16	6	0	22	0	23	0	0	23	6	22	0	23	chr4_443116
chr4	443117	443117	8.7	8.7%_23r	chr4	443117	lgs	EXON	0	21	2	0	23	0	22	0	0	22	2	23	0	22	chr4_443117
chr4	443135	443135	20.8	20.8%_24r	chr4	443135	lgs	EXON	0	19	5	0	24	1	25	0	0	26	5	24	0	26	chr4_443135
chr4	443225	443225	36.4	36.4%_22r	chr4	443225	lgs	EXON	0	14	8	0	22	0	35	0	0	35	8	22	0	35	chr4_443225
chr4	443261	443261	29	29.0%_31r	chr4	443261	lgs	EXON	0	22	9	0	31	0	44	0	0	44	9	31	0	44	chr4_443261
chr4	443264	443264	26.7	26.7%_30r	chr4	443264	lgs	EXON	0	22	8	0	30	0	38	0	0	38	8	30	0	38	chr4_443264
chr4	443295	443295	8.3	8.3%_36r	chr4	443295	lgs	EXON	0	33	3	0	36	0	26	0	0	26	3	36	0	26	chr4_443295
chr4	443343	443343	6.9	6.9%_29r	chr4	443343	lgs	EXON	0	27	2	0	29	0	31	0	0	31	2	29	0	31	chr4_443343
chr4	443411	443411	18.5	18.5%_27r	chr4	443411	lgs	EXON	0	22	5	0	27	0	26	0	0	26	5	27	0	26	chr4_443411
chr4	443423	443423	40.9	40.9%_22r	chr4	443423	lgs	EXON	0	13	9	0	22	0	32	0	0	32	9	22	0	32	chr4_443423
chr4	443436	443436	23.1	23.1%_26r	chr4	443436	lgs	EXON	0	20	6	0	26	0	36	0	0	36	6	26	0	36	chr4_443436
chr4	443445	443445	9.1	9.1%_22r	chr4	443445	lgs	EXON	0	20	2	0	22	0	40	0	0	40	2	22	0	40	chr4_443445
chr4	443457	443457	12.5	12.5%_24r	chr4	443457	lgs	EXON	0	21	3	0	24	0	33	0	0	33	3	24	0	33	chr4_443457
chr4	443476	443476	7.4	7.4%_27r	chr4	443476	lgs	EXON	0	25	2	0	27	0	30	0	0	30	2	27	0	30	chr4_443476
chr4	443482	443482	10.7	10.7%_28r	chr4	443482	lgs	EXON	0	25	3	0	28	0	31	0	0	31	3	28	0	31	chr4_443482
chr4	443529	443529	16.7	16.7%_24r	chr4	443529	lgs	EXON	0	20	4	0	24	0	44	0	0	44	4	24	0	44	chr4_443529
chr4	443606	443606	10	10.0%_30r	chr4	443606	lgs	EXON	0	27	3	0	30	0	12	0	0	12	3	30	0	12	chr4_443606
chr4	443613	443613	8	8.0%_25r	chr4	443613	lgs	EXON	0	23	2	0	25	0	14	0	0	14	2	25	0	14	chr4_443613
chr4	443658	443658	16.7	16.7%_24r	chr4	443658	lgs	EXON	0	20	4	0	24	0	28	0	0	28	4	24	0	28	chr4_443658
chr4	443712	443712	8.3	8.3%_24r	chr4	443712	lgs	EXON	0	22	2	0	24	0	24	0	1	25	2	24	0	25	chr4_443712
chr4	443718	443718	21.7	21.7%_23r	chr4	443718	lgs	EXON	0	18	5	0	23	0	28	0	0	28	5	23	0	28	chr4_443718
chr4	1029880	1029880	8.5	8.5%_59r	chr4	1029880	CG11076	EXON	0	54	5	0	59	0	270	0	1	271	5	59	0	271	chr4_1029880
chr4	1029903	1029903	9.8	9.8%_51r	chr4	1029903	CG11076	EXON	0	46	5	0	51	0	215	0	0	215	5	51	0	215	chr4_1029903
chr4	1029909	1029909	22	22.0%_50r	chr4	1029909	CG11076	EXON	0	39	11	0	50	1	221	0	0	222	11	50	0	222	chr4_1029909
chr4	1029957	1029957	12.5	12.5%_40r	chr4	1029957	CG11076	EXON	0	35	5	0	40	0	199	0	0	199	5	40	0	199	chr4_1029957
chr4	1029974	1029974	12.2	12.2%_41r	chr4	1029974	CG11076	EXON	0	36	5	0	41	0	222	0	0	222	5	41	0	222	chr4_1029974
chr4	1029975	1029975	12.2	12.2%_41r	chr4	1029975	CG11076	EXON	0	36	5	0	41	0	221	0	0	221	5	41	0	221	chr4_1029975
chr4	1029980	1029980	7.7	7.7%_39r	chr4	1029980	CG11076	EXON	0	36	3	0	39	0	214	0	0	214	3	39	0	214	chr4_1029980
chr4	1029994	1029994	35.7	35.7%_28r	chr4	1029994	CG11076	EXON	0	18	10	0	28	0	206	0	0	206	10	28	0	206	chr4_1029994
chr4	1030012	1030012	9.1	9.1%_33r	chr4	1030012	CG11076	EXON	0	30	3	0	33	0	163	0	0	163	3	33	0	163	chr4_1030012
chr4	1030023	1030023	34.4	34.4%_32r	chr4	1030023	CG11076	EXON	0	21	11	0	32	1	125	0	0	126	11	32	0	126	chr4_1030023
chr4	1030030	1030030	11.1	11.1%_36r	chr4	1030030	CG11076	EXON	0	32	4	0	36	0	138	0	0	138	4	36	0	138	chr4_1030030
chr4	1030197	1030197	12	12.0%_83r	chr4	1030197	CG11076	EXON	0	73	10	0	83	1	341	0	1	343	10	83	0	343	chr4_1030197
chr4	1030237	1030237	19	19.0%_79r	chr4	1030237	CG11076	EXON	0	64	15	0	79	0	390	0	0	390	15	79	0	390	chr4_1030237
chr4	1030246	1030246	6.7	6.7%_60r	chr4	1030246	CG11076	EXON	0	56	4	0	60	1	341	1	0	343	4	60	1	343	chr4_1030246
chr4	1030261	1030261	17.3	17.3%_52r	chr4	1030261	CG11076	EXON	0	43	9	0	52	0	268	0	0	268	9	52	0	268	chr4_1030261
chr4	1030265	1030265	6.5	6.5%_46r	chr4	1030265	CG11076	EXON	0	43	3	0	46	0	251	0	0	251	3	46	0	251	chr4_1030265
chr4	1030283	1030283	7.5	7.5%_53r	chr4	1030283	CG11076	EXON	0	49	4	0	53	0	220	0	0	220	4	53	0	220	chr4_1030283
chr4	1030298	1030298	19.6	19.6%_56r	chr4	1030298	CG11076	EXON	0	45	11	0	56	0	223	0	0	223	11	56	0	223	chr4_1030298
chr4	1030335	1030335	14.9	14.9%_67r	chr4	1030335	CG11076	EXON	0	57	10	0	67	0	282	0	0	282	10	67	0	282	chr4_1030335
chr4	1030456	1030456	15.2	15.2%_79r	chr4	1030456	CG11076	EXON	1	66	12	0	79	1	390	0	0	391	12	79	0	391	chr4_1030456
chr4	1030457	1030457	12.7	12.7%_79r	chr4	1030457	CG11076	EXON	0	69	10	0	79	1	387	0	0	388	10	79	0	388	chr4_1030457
chr4	1030464	1030464	23.8	23.8%_80r	chr4	1030464	CG11076	EXON	0	61	19	0	80	0	329	0	1	330	19	80	0	330	chr4_1030464
chr4	1030585	1030585	24.3	24.3%_70r	chr4	1030585	CG11076	EXON	0	53	17	0	70	0	182	0	0	182	17	70	0	182	chr4_1030585
chr4	1030605	1030605	11.9	11.9%_67r	chr4	1030605	CG11076	EXON	0	59	8	0	67	0	253	0	0	253	8	67	0	253	chr4_1030605
chr4	1030622	1030622	33.8	33.8%_65r	chr4	1030622	CG11076	EXON	0	43	22	0	65	0	318	0	0	318	22	65	0	318	chr4_1030622
chr4	1030635	1030635	14.9	14.9%_87r	chr4	1030635	CG11076	EXON	0	74	13	0	87	0	329	0	0	329	13	87	0	329	chr4_1030635
chr4	1030644	1030644	10.6	10.6%_66r	chr4	1030644	CG11076	EXON	0	59	7	0	66	0	254	0	0	254	7	66	0	254	chr4_1030644
chr4	1030658	1030658	6.8	6.8%_73r	chr4	1030658	CG11076	EXON	0	68	5	0	73	0	193	0	0	193	5	73	0	193	chr4_1030658
chr4	1030666	1030666	9.2	9.2%_76r	chr4	1030666	CG11076	EXON	0	68	7	1	76	0	202	0	1	203	7	76	0	203	chr4_1030666
chr4	1030742	1030742	17.1	17.1%_41r	chr4	1030742	CG11076	EXON	0	34	7	0	41	0	109	0	1	110	7	41	0	110	chr4_1030742
chr4	1115843	1115843	6.7	6.7%_30r	chr4	1115843	Cals	EXON	0	28	2	0	30	0	164	0	0	164	2	30	0	164	chr4_1115843
chr4	1116893	1116893	16	16.0%_25r	chr4	1116893	Cals	EXON	0	21	4	0	25	0	182	0	0	182	4	25	0	182	chr4_1116893
chr4	1116895	1116895	16.7	16.7%_24r	chr4	1116895	Cals	EXON	0	20	4	0	24	0	181	0	0	181	4	24	0	181	chr4_1116895
chr4	1116914	1116914	30.8	30.8%_26r	chr4	1116914	Cals	EXON	0	18	8	0	26	0	195	0	0	195	8	26	0	195	chr4_1116914
chr4	1117202	1117202	11.1	11.1%_27r	chr4	1117202	Cals	EXON	0	24	3	0	27	0	166	0	0	166	3	27	0	166	chr4_1117202
chr4	1118040	1118040	8.7	8.7%_23r	chr4	1118040	Cals	EXON	0	21	2	0	23	0	176	0	0	176	2	23	0	176	chr4_1118040
chr4	1118126	1118126	18.2	18.2%_22r	chr4	1118126	Cals	EXON	0	18	4	0	22	0	243	0	0	243	4	22	0	243	chr4_1118126
chr4	1118336	1118336	25	25.0%_20r	chr4	1118336	Cals	EXON	0	15	5	0	20	0	217	0	0	217	5	20	0	217	chr4_1118336
chr4	1118379	1118379	9.1	9.1%_22r	chr4	1118379	Cals	EXON	0	20	2	0	22	0	171	0	0	171	2	22	0	171	chr4_1118379
chr4	1118389	1118389	10	10.0%_20r	chr4	1118389	Cals	EXON	0	18	2	0	20	0	162	0	0	162	2	20	0	162	chr4_1118389
chr4	1118421	1118421	8.3	8.3%_24r	chr4	1118421	Cals	EXON	0	22	2	0	24	0	200	0	0	200	2	24	0	200	chr4_1118421
chr4	1118429	1118429	6.5	6.5%_31r	chr4	1118429	Cals	EXON	0	29	2	0	31	0	233	0	0	233	2	31	0	233	chr4_1118429
chr4	1118557	1118557	10	10.0%_20r	chr4	1118557	Cals	EXON	0	18	2	0	20	0	206	0	0	206	2	20	0	206	chr4_1118557
chr4	1118984	1118984	12	12.0%_25r	chr4	1118984	Cals	EXON	0	22	3	0	25	1	254	0	0	255	3	25	0	255	chr4_1118984
chr4	59986	59986	10.7	10.7%_28r	chr4	59986	CR43957	EXON	25	0	0	3	28	28	0	0	0	28	3	28	0	28	chr4_59986
chr4	59999	59999	6.5	6.5%_31r	chr4	59999	CR43957	EXON	29	0	0	2	31	31	0	0	0	31	2	31	0	31	chr4_59999
chr4	60008	60008	65.2	65.2%_23r	chr4	60008	CR43957	EXON	8	0	0	15	23	35	0	0	0	35	15	23	0	35	chr4_60008
chr4	60011	60011	17.4	17.4%_23r	chr4	60011	CR43957	EXON	19	0	0	4	23	33	0	0	0	33	4	23	0	33	chr4_60011
chr4	60086	60086	13.8	13.8%_29r	chr4	60086	CR43957	EXON	25	0	0	4	29	19	0	0	0	19	4	29	0	19	chr4_60086
chr4	60097	60097	22.5	22.5%_40r	chr4	60097	CR43957	EXON	31	0	0	9	40	27	0	0	0	27	9	40	0	27	chr4_60097
chr4	60098	60098	10	10.0%_40r	chr4	60098	CR43957	EXON	36	0	0	4	40	27	0	0	0	27	4	40	0	27	chr4_60098
chr4	60122	60122	6.3	6.3%_79r	chr4	60122	CR43957	EXON	74	0	0	5	79	55	0	0	0	55	5	79	0	55	chr4_60122
chr4	60134	60134	11.5	11.5%_52r	chr4	60134	CR43957	EXON	46	0	0	6	52	45	0	0	0	45	6	52	0	45	chr4_60134
chr4	60136	60136	14.3	14.3%_49r	chr4	60136	CR43957	EXON	42	0	0	7	49	44	0	0	0	44	7	49	0	44	chr4_60136
chr4	60138	60138	6.1	6.1%_49r	chr4	60138	CR43957	EXON	46	0	0	3	49	41	0	0	0	41	3	49	0	41	chr4_60138
chr4	60140	60140	11.1	11.1%_45r	chr4	60140	CR43957	EXON	40	0	0	5	45	33	0	0	0	33	5	45	0	33	chr4_60140
chr4	60155	60155	16	16.0%_25r	chr4	60155	CR43957	EXON	21	0	0	4	25	49	0	0	0	49	4	25	0	49	chr4_60155
chr4	60159	60159	7.7	7.7%_26r	chr4	60159	CR43957	EXON	24	0	0	2	26	66	0	0	0	66	2	26	0	66	chr4_60159
chr4	60163	60163	10	10.0%_30r	chr4	60163	CR43957	EXON	27	0	0	3	30	80	0	0	0	80	3	30	0	80	chr4_60163
chr4	60172	60172	16.1	16.1%_31r	chr4	60172	CR43957	EXON	26	0	0	5	31	103	0	0	0	103	5	31	0	103	chr4_60172
chr4	60195	60195	70.4	70.4%_27r	chr4	60195	CR43957	EXON	8	0	0	19	27	73	0	0	0	73	19	27	0	73	chr4_60195
chr4	60196	60196	37	37.0%_27r	chr4	60196	CR43957	EXON	17	0	0	10	27	73	0	0	0	73	10	27	0	73	chr4_60196
chr4	60212	60212	12	12.0%_25r	chr4	60212	CR43957	EXON	22	0	0	3	25	48	0	0	0	48	3	25	0	48	chr4_60212
chr4	60245	60245	8.6	8.6%_35r	chr4	60245	CR43957	EXON	32	0	0	3	35	52	0	0	0	52	3	35	0	52	chr4_60245
chr4	60261	60261	18.2	18.2%_33r	chr4	60261	CR43957	EXON	27	0	0	6	33	45	0	0	0	45	6	33	0	45	chr4_60261
chr4	60264	60264	12.9	12.9%_31r	chr4	60264	CR43957	EXON	27	0	0	4	31	43	0	0	0	43	4	31	0	43	chr4_60264
chr4	60268	60268	6.2	6.2%_32r	chr4	60268	CR43957	EXON	30	0	0	2	32	50	0	0	0	50	2	32	0	50	chr4_60268
chr4	60272	60272	18.8	18.8%_32r	chr4	60272	CR43957	EXON	26	0	0	6	32	54	0	0	0	54	6	32	0	54	chr4_60272
chr4	60284	60284	16.1	16.1%_56r	chr4	60284	CR43957	EXON	47	0	0	9	56	58	0	0	0	58	9	56	0	58	chr4_60284
chr4	60306	60306	7.4	7.4%_54r	chr4	60306	CR43957	EXON	50	0	0	4	54	64	0	0	0	64	4	54	0	64	chr4_60306
chr4	60326	60326	23.8	23.8%_63r	chr4	60326	CR43957	EXON	48	0	0	15	63	90	0	0	0	90	15	63	0	90	chr4_60326
chr4	60367	60367	7.7	7.7%_52r	chr4	60367	CR43957	EXON	48	0	0	4	52	83	0	0	0	83	4	52	0	83	chr4_60367
chr4	60368	60368	7.5	7.5%_53r	chr4	60368	CR43957	EXON	49	0	0	4	53	83	0	0	0	83	4	53	0	83	chr4_60368
chr4	60377	60377	6.6	6.6%_61r	chr4	60377	CR43957	EXON	57	0	0	4	61	79	0	0	0	79	4	61	0	79	chr4_60377
chr4	60383	60383	9	9.0%_67r	chr4	60383	CR43957	EXON	61	0	0	6	67	75	0	0	0	75	6	67	0	75	chr4_60383
chr4	60386	60386	10.3	10.3%_68r	chr4	60386	CR43957	EXON	60	1	0	7	68	83	0	0	0	83	7	68	0	83	chr4_60386
chr4	60418	60418	8.5	8.5%_47r	chr4	60418	CR43957	INTRON	43	0	0	4	47	134	0	0	0	134	4	47	0	134	chr4_60418
chr4	60431	60431	6.7	6.7%_60r	chr4	60431	CR43957	INTRON	56	0	0	4	60	178	0	0	0	178	4	60	0	178	chr4_60431
chr4	60437	60437	13.4	13.4%_82r	chr4	60437	CR43957	INTRON	71	0	0	11	82	176	0	0	0	176	11	82	0	176	chr4_60437
chr4	60441	60441	17	17.0%_88r	chr4	60441	CR43957	INTRON	73	0	0	15	88	171	0	0	0	171	15	88	0	171	chr4_60441
chr4	60449	60449	10.4	10.4%_67r	chr4	60449	CR43957	INTRON	60	0	0	7	67	134	0	0	0	134	7	67	0	134	chr4_60449
chr4	60453	60453	30.2	30.2%_53r	chr4	60453	CR43957	INTRON	37	0	0	16	53	92	0	0	0	92	16	53	0	92	chr4_60453
chr4	60457	60457	19.6	19.6%_51r	chr4	60457	CR43957	INTRON	41	0	0	10	51	73	0	0	0	73	10	51	0	73	chr4_60457
chr4	308137	308137	44	44.0%_25r	chr4	308137	Rad23	EXON	14	0	0	11	25	61	0	0	0	61	11	25	0	61	chr4_308137
chr4	308138	308138	8	8.0%_25r	chr4	308138	Rad23	EXON	23	0	0	2	25	59	0	0	0	59	2	25	0	59	chr4_308138
chr4	308144	308144	15.8	15.8%_38r	chr4	308144	Rad23	EXON	32	0	0	6	38	115	0	0	0	115	6	38	0	115	chr4_308144
chr4	308242	308242	18.9	18.9%_90r	chr4	308242	Rad23	EXON	73	0	0	17	90	246	0	0	0	246	17	90	0	246	chr4_308242
chr4	308257	308257	13.5	13.5%_104r	chr4	308257	Rad23	EXON	90	0	0	14	104	195	0	0	0	195	14	104	0	195	chr4_308257
chr4	308284	308284	9.6	9.6%_115r	chr4	308284	Rad23	EXON	104	0	0	11	115	166	0	0	0	166	11	115	0	166	chr4_308284
chr4	308472	308472	11.2	11.2%_178r	chr4	308472	Rad23	EXON	157	1	0	20	178	299	2	0	1	302	20	178	1	302	chr4_308472
chr4	308533	308533	10.3	10.3%_185r	chr4	308533	Rad23	EXON	166	0	0	19	185	316	0	0	0	316	19	185	0	316	chr4_308533
chr4	308546	308546	7.2	7.2%_223r	chr4	308546	Rad23	EXON	207	0	0	16	223	363	0	0	0	363	16	223	0	363	chr4_308546
chr4	308549	308549	34.3	34.3%_204r	chr4	308549	Rad23	EXON	133	1	0	70	204	325	0	0	0	325	70	204	0	325	chr4_308549
chr4	308564	308564	22.7	22.7%_194r	chr4	308564	Rad23	EXON	150	0	0	44	194	293	0	0	0	293	44	194	0	293	chr4_308564
chr4	308599	308599	21.6	21.6%_232r	chr4	308599	Rad23	EXON	182	0	0	50	232	342	2	0	0	344	50	232	0	344	chr4_308599
chr4	308616	308616	6	6.0%_249r	chr4	308616	Rad23	EXON	234	0	0	15	249	416	0	0	0	416	15	249	0	416	chr4_308616
chr4	308647	308647	22.7	22.7%_194r	chr4	308647	Rad23	EXON	150	0	0	44	194	355	1	0	0	356	44	194	0	356	chr4_308647
chr4	308663	308663	36.9	36.9%_203r	chr4	308663	Rad23	EXON	127	1	0	75	203	384	1	0	0	385	75	203	0	385	chr4_308663
chr4	308682	308682	10.1	10.1%_179r	chr4	308682	Rad23	EXON	161	0	0	18	179	359	0	0	0	359	18	179	0	359	chr4_308682
chr4	308685	308685	7	7.0%_172r	chr4	308685	Rad23	EXON	159	0	1	12	172	364	0	2	0	366	12	172	0	366	chr4_308685
chr4	308707	308707	17.7	17.7%_164r	chr4	308707	Rad23	EXON	135	0	0	29	164	349	0	0	0	349	29	164	0	349	chr4_308707
chr4	308716	308716	7.4	7.4%_217r	chr4	308716	Rad23	EXON	201	0	0	16	217	419	0	0	0	419	16	217	0	419	chr4_308716
chr4	308726	308726	15.3	15.3%_176r	chr4	308726	Rad23	EXON	149	0	0	27	176	369	0	0	0	369	27	176	0	369	chr4_308726
chr4	308730	308730	16.3	16.3%_153r	chr4	308730	Rad23	EXON	128	0	0	25	153	354	1	0	1	356	25	153	1	356	chr4_308730
chr4	308749	308749	23.5	23.5%_183r	chr4	308749	Rad23	EXON	140	0	0	43	183	351	0	0	0	351	43	183	0	351	chr4_308749
chr4	308757	308757	10.5	10.5%_209r	chr4	308757	Rad23	EXON	186	1	0	22	209	449	0	0	0	449	22	209	0	449	chr4_308757
chr4	308813	308813	13	13.0%_230r	chr4	308813	Rad23	EXON	199	1	0	30	230	404	0	0	0	404	30	230	0	404	chr4_308813
chr4	308818	308818	73.6	73.6%_208r	chr4	308818	Rad23	EXON	54	1	0	153	208	430	0	0	0	430	153	208	0	430	chr4_308818
chr4	308881	308881	8.1	8.1%_283r	chr4	308881	Rad23	EXON	260	0	0	23	283	448	0	0	2	450	23	283	2	450	chr4_308881
chr4	308888	308888	30.4	30.4%_240r	chr4	308888	Rad23	EXON	167	0	0	73	240	375	0	2	1	378	73	240	1	378	chr4_308888
chr4	308895	308895	51	51.0%_249r	chr4	308895	Rad23	EXON	122	0	0	127	249	421	0	0	0	421	127	249	0	421	chr4_308895
chr4	308911	308911	19.8	19.8%_262r	chr4	308911	Rad23	EXON	209	0	1	52	262	433	0	0	0	433	52	262	0	433	chr4_308911
chr4	308986	308986	44.4	44.4%_243r	chr4	308986	Rad23	EXON	134	0	1	108	243	498	0	0	0	498	108	243	0	498	chr4_308986
chr4	309001	309001	19.1	19.1%_215r	chr4	309001	Rad23	EXON	174	0	0	41	215	453	0	1	0	454	41	215	0	454	chr4_309001
chr4	309010	309010	6.2	6.2%_306r	chr4	309010	Rad23	EXON	287	0	0	19	306	497	1	1	1	500	19	306	1	500	chr4_309010
chr4	309073	309073	6.2	6.2%_177r	chr4	309073	Rad23	EXON	165	1	0	11	177	258	0	0	0	258	11	177	0	258	chr4_309073
chr4	309578	309578	26.3	26.3%_186r	chr4	309578	Rad23	EXON	137	0	0	49	186	315	0	0	0	315	49	186	0	315	chr4_309578
chr4	309592	309592	10.8	10.8%_176r	chr4	309592	Rad23	EXON	157	0	0	19	176	403	0	0	0	403	19	176	0	403	chr4_309592
chr4	309596	309596	12.3	12.3%_162r	chr4	309596	Rad23	EXON	140	2	0	20	162	386	0	0	0	386	20	162	0	386	chr4_309596
chr4	309757	309757	6.4	6.4%_235r	chr4	309757	Rad23	EXON	219	1	0	15	235	434	0	0	0	434	15	235	0	434	chr4_309757
chr4	309763	309763	25	25.0%_196r	chr4	309763	Rad23	EXON	147	0	0	49	196	406	0	1	0	407	49	196	0	407	chr4_309763
chr4	309792	309792	25.8	25.8%_155r	chr4	309792	Rad23	EXON	114	1	0	40	155	273	0	0	0	273	40	155	0	273	chr4_309792
chr4	309799	309799	8.8	8.8%_171r	chr4	309799	Rad23	EXON	155	1	0	15	171	289	1	2	0	292	15	171	0	292	chr4_309799
chr4	309864	309864	7.7	7.7%_130r	chr4	309864	Rad23	EXON	120	0	0	10	130	357	0	0	0	357	10	130	0	357	chr4_309864
chr4	309870	309870	9	9.0%_144r	chr4	309870	Rad23	EXON	131	0	0	13	144	420	1	0	0	421	13	144	0	421	chr4_309870
chr4	309873	309873	12.2	12.2%_139r	chr4	309873	Rad23	EXON	122	0	0	17	139	461	0	0	0	461	17	139	0	461	chr4_309873
chr4	309876	309876	20.5	20.5%_132r	chr4	309876	Rad23	EXON	105	0	0	27	132	439	0	1	0	440	27	132	0	440	chr4_309876
chr4	309888	309888	23	23.0%_126r	chr4	309888	Rad23	EXON	96	1	0	29	126	435	2	0	0	437	29	126	0	437	chr4_309888
chr4	309891	309891	8.3	8.3%_121r	chr4	309891	Rad23	EXON	111	0	0	10	121	407	0	0	0	407	10	121	0	407	chr4_309891
chr4	309892	309892	52.1	52.1%_117r	chr4	309892	Rad23	EXON	56	0	0	61	117	402	0	0	0	402	61	117	0	402	chr4_309892
chr4	309897	309897	31.3	31.3%_115r	chr4	309897	Rad23	EXON	78	0	1	36	115	365	0	0	1	366	36	115	1	366	chr4_309897
chr4	309931	309931	14	14.0%_164r	chr4	309931	Rad23	EXON	141	0	0	23	164	413	0	0	2	415	23	164	2	415	chr4_309931
chr4	309936	309936	12.1	12.1%_157r	chr4	309936	Rad23	EXON	137	1	0	19	157	390	0	0	0	390	19	157	0	390	chr4_309936
chr4	309944	309944	14.9	14.9%_175r	chr4	309944	Rad23	EXON	148	0	1	26	175	425	1	0	0	426	26	175	0	426	chr4_309944
chr4	309948	309948	7.9	7.9%_178r	chr4	309948	Rad23	EXON	164	0	0	14	178	398	0	0	0	398	14	178	0	398	chr4_309948
chr4	309966	309966	18.2	18.2%_286r	chr4	309966	Rad23	EXON	234	0	0	52	286	499	0	0	0	499	52	286	0	499	chr4_309966
chr4	310001	310001	7.8	7.8%_217r	chr4	310001	Rad23	EXON	200	0	0	17	217	376	0	0	0	376	17	217	0	376	chr4_310001
chr4	310011	310011	51.8	51.8%_191r	chr4	310011	Rad23	EXON	92	0	0	99	191	390	2	0	0	392	99	191	0	392	chr4_310011
chr4	310099	310099	31.8	31.8%_151r	chr4	310099	Rad23	EXON	103	0	0	48	151	369	0	0	0	369	48	151	0	369	chr4_310099
chr4	310117	310117	7	7.0%_157r	chr4	310117	Rad23	EXON	146	0	0	11	157	308	0	0	0	308	11	157	0	308	chr4_310117
chr4	310137	310137	45.9	45.9%_109r	chr4	310137	Rad23	EXON	59	0	0	50	109	222	0	0	0	222	50	109	0	222	chr4_310137
chr4	310153	310153	8	8.0%_112r	chr4	310153	Rad23	EXON	103	0	0	9	112	193	0	0	0	193	9	112	0	193	chr4_310153
chr4	310157	310157	34.7	34.7%_124r	chr4	310157	Rad23	EXON	81	0	0	43	124	215	0	0	0	215	43	124	0	215	chr4_310157
chr4	310168	310168	10.3	10.3%_146r	chr4	310168	Rad23	EXON	131	0	0	15	146	285	0	0	0	285	15	146	0	285	chr4_310168
chr4	310175	310175	58.9	58.9%_141r	chr4	310175	Rad23	EXON	58	0	0	83	141	321	0	1	0	322	83	141	0	322	chr4_310175
chr4	310228	310228	15.6	15.6%_135r	chr4	310228	Rad23	EXON	114	0	0	21	135	338	0	0	0	338	21	135	0	338	chr4_310228
chr4	310234	310234	7.1	7.1%_155r	chr4	310234	Rad23	EXON	144	0	0	11	155	299	0	0	0	299	11	155	0	299	chr4_310234
chr4	310240	310240	12.5	12.5%_168r	chr4	310240	Rad23	EXON	147	0	0	21	168	273	1	0	0	274	21	168	0	274	chr4_310240
chr4	310246	310246	23	23.0%_100r	chr4	310246	Rad23	EXON	77	0	0	23	100	205	0	0	0	205	23	100	0	205	chr4_310246
chr4	310329	310329	15.9	15.9%_44r	chr4	310329	Rad23	EXON	37	0	0	7	44	150	0	0	0	150	7	44	0	150	chr4_310329
chr4	310355	310355	14.5	14.5%_55r	chr4	310355	Rad23	EXON	47	0	0	8	55	140	0	0	0	140	8	55	0	140	chr4_310355
chr4	310360	310360	15.9	15.9%_63r	chr4	310360	Rad23	EXON	53	0	0	10	63	132	0	0	0	132	10	63	0	132	chr4_310360
chr4	310374	310374	23.5	23.5%_51r	chr4	310374	Rad23	EXON	39	0	0	12	51	110	0	0	0	110	12	51	0	110	chr4_310374
chr4	310380	310380	10.2	10.2%_49r	chr4	310380	Rad23	EXON	44	0	0	5	49	103	0	0	0	103	5	49	0	103	chr4_310380
chr4	310409	310409	13.3	13.3%_75r	chr4	310409	Rad23	EXON	65	0	0	10	75	137	0	0	0	137	10	75	0	137	chr4_310409
chr4	310415	310415	12.3	12.3%_73r	chr4	310415	Rad23	EXON	63	1	0	9	73	152	0	0	0	152	9	73	0	152	chr4_310415
chr4	310417	310417	7.1	7.1%_70r	chr4	310417	Rad23	EXON	65	0	0	5	70	151	0	0	0	151	5	70	0	151	chr4_310417
chr4	310448	310448	6.8	6.8%_73r	chr4	310448	Rad23	EXON	68	0	0	5	73	153	0	0	0	153	5	73	0	153	chr4_310448
chr4	310452	310452	8.8	8.8%_80r	chr4	310452	Rad23	EXON	73	0	0	7	80	156	0	0	0	156	7	80	0	156	chr4_310452
chr4	310457	310457	73	73.0%_74r	chr4	310457	Rad23	EXON	20	0	0	54	74	136	0	0	0	136	54	74	0	136	chr4_310457
chr4	310473	310473	53.4	53.4%_73r	chr4	310473	Rad23	EXON	34	0	0	39	73	180	0	0	0	180	39	73	0	180	chr4_310473
chr4	310490	310490	7.8	7.8%_64r	chr4	310490	Rad23	EXON	59	0	0	5	64	222	0	0	0	222	5	64	0	222	chr4_310490
chr4	310497	310497	67.9	67.9%_56r	chr4	310497	Rad23	EXON	18	0	0	38	56	226	0	0	0	226	38	56	0	226	chr4_310497
chr4	310500	310500	8.1	8.1%_74r	chr4	310500	Rad23	EXON	68	0	0	6	74	249	0	0	0	249	6	74	0	249	chr4_310500
chr4	310517	310517	72.5	72.5%_51r	chr4	310517	Rad23	EXON	14	0	0	37	51	204	0	0	0	204	37	51	0	204	chr4_310517
chr4	310523	310523	10.3	10.3%_68r	chr4	310523	Rad23	EXON	61	0	0	7	68	187	0	0	0	187	7	68	0	187	chr4_310523
chr4	310528	310528	7.8	7.8%_77r	chr4	310528	Rad23	EXON	71	0	0	6	77	183	0	0	0	183	6	77	0	183	chr4_310528
chr4	310537	310537	22.5	22.5%_71r	chr4	310537	Rad23	EXON	55	0	0	16	71	159	0	1	0	160	16	71	0	160	chr4_310537
chr4	310541	310541	17.7	17.7%_62r	chr4	310541	Rad23	EXON	51	0	0	11	62	131	0	0	0	131	11	62	0	131	chr4_310541
chr4	310571	310571	7.8	7.8%_64r	chr4	310571	Rad23	EXON	59	0	0	5	64	84	0	0	0	84	5	64	0	84	chr4_310571
chr4	310573	310573	16.4	16.4%_55r	chr4	310573	Rad23	EXON	46	0	0	9	55	82	0	1	0	83	9	55	0	83	chr4_310573
chr4	310576	310576	22.4	22.4%_49r	chr4	310576	Rad23	EXON	38	0	0	11	49	67	0	0	0	67	11	49	0	67	chr4_310576
chr4	310582	310582	24	24.0%_50r	chr4	310582	Rad23	EXON	38	0	0	12	50	63	0	0	0	63	12	50	0	63	chr4_310582
chr4	310589	310589	13.6	13.6%_44r	chr4	310589	Rad23	EXON	38	0	0	6	44	63	0	0	0	63	6	44	0	63	chr4_310589
chr4	310600	310600	24.4	24.4%_41r	chr4	310600	Rad23	EXON	31	0	0	10	41	55	0	0	0	55	10	41	0	55	chr4_310600
chr4	310614	310614	7.5	7.5%_40r	chr4	310614	Rad23	EXON	37	0	0	3	40	51	0	0	0	51	3	40	0	51	chr4_310614
chr4	310618	310618	53.8	53.8%_39r	chr4	310618	Rad23	EXON	18	0	0	21	39	50	0	0	0	50	21	39	0	50	chr4_310618
chr4	310619	310619	76.3	76.3%_38r	chr4	310619	Rad23	EXON	9	0	0	29	38	53	0	0	0	53	29	38	0	53	chr4_310619
chr4	185864	185864	20	20.0%_20r	chr4	185864	CG2316	EXON	0	16	4	0	20	0	156	0	0	156	4	20	0	156	chr4_185864
chr4	186015	186015	7.4	7.4%_27r	chr4	186015	CG2316	EXON	0	25	2	0	27	0	108	0	0	108	2	27	0	108	chr4_186015
chr4	186029	186029	14.3	14.3%_28r	chr4	186029	CG2316	EXON	0	24	4	0	28	0	110	0	0	110	4	28	0	110	chr4_186029
chr4	186039	186039	6.2	6.2%_32r	chr4	186039	CG2316	EXON	0	30	2	0	32	0	163	0	0	163	2	32	0	163	chr4_186039
chr4	186044	186044	66.7	66.7%_21r	chr4	186044	CG2316	EXON	0	7	14	0	21	0	131	0	0	131	14	21	0	131	chr4_186044
chr4	186110	186110	13.6	13.6%_22r	chr4	186110	CG2316	EXON	0	19	3	0	22	0	224	0	0	224	3	22	0	224	chr4_186110
chr4	186163	186163	25	25.0%_20r	chr4	186163	CG2316	EXON	0	15	5	0	20	0	221	0	0	221	5	20	0	221	chr4_186163
chr4	186223	186223	9.1	9.1%_22r	chr4	186223	CG2316	EXON	0	20	2	0	22	0	137	0	0	137	2	22	0	137	chr4_186223
chr4	186225	186225	9.5	9.5%_21r	chr4	186225	CG2316	EXON	0	19	2	0	21	0	141	0	0	141	2	21	0	141	chr4_186225
chr4	186238	186238	19	19.0%_21r	chr4	186238	CG2316	EXON	0	17	4	0	21	0	162	0	0	162	4	21	0	162	chr4_186238
chr4	186250	186250	9.7	9.7%_31r	chr4	186250	CG2316	EXON	0	28	3	0	31	0	174	0	0	174	3	31	0	174	chr4_186250
chr4	186282	186282	8.3	8.3%_24r	chr4	186282	CG2316	EXON	0	22	2	0	24	0	214	0	0	214	2	24	0	214	chr4_186282
chr4	186286	186286	8.3	8.3%_24r	chr4	186286	CG2316	EXON	0	21	2	1	24	0	205	1	1	207	2	24	1	207	chr4_186286
chr4	186287	186287	8.7	8.7%_23r	chr4	186287	CG2316	EXON	0	21	2	0	23	0	206	0	0	206	2	23	0	206	chr4_186287
chr4	186313	186313	11.5	11.5%_26r	chr4	186313	CG2316	EXON	0	23	3	0	26	0	207	0	0	207	3	26	0	207	chr4_186313
chr4	186372	186372	15	15.0%_20r	chr4	186372	CG2316	EXON	0	17	3	0	20	0	156	0	0	156	3	20	0	156	chr4_186372
chr4	188025	188025	15	15.0%_20r	chr4	188025	CG2316	EXON	0	17	3	0	20	0	119	0	0	119	3	20	0	119	chr4_188025
chr4	188035	188035	9.5	9.5%_21r	chr4	188035	CG2316	EXON	0	19	2	0	21	0	161	0	0	161	2	21	0	161	chr4_188035
chr4	188059	188059	8	8.0%_25r	chr4	188059	CG2316	EXON	0	23	2	0	25	0	157	0	0	157	2	25	0	157	chr4_188059
chr4	188317	188317	8.7	8.7%_23r	chr4	188317	CG2316	EXON	0	21	2	0	23	0	151	0	0	151	2	23	0	151	chr4_188317
chr4	189020	189020	10.3	10.3%_29r	chr4	189020	CG2316	EXON	0	26	3	0	29	0	145	0	0	145	3	29	0	145	chr4_189020
chr4	189046	189046	18.5	18.5%_27r	chr4	189046	CG2316	EXON	0	22	5	0	27	0	146	0	0	146	5	27	0	146	chr4_189046
chr4	189056	189056	20.7	20.7%_29r	chr4	189056	CG2316	EXON	0	23	6	0	29	0	168	0	0	168	6	29	0	168	chr4_189056
chr4	189061	189061	8.3	8.3%_24r	chr4	189061	CG2316	EXON	0	22	2	0	24	0	157	0	0	157	2	24	0	157	chr4_189061
chr4	1028755	1028755	6.1	6.1%_99r	chr4	1028755	CG11077	EXON	0	93	6	0	99	1	430	0	1	432	6	99	0	432	chr4_1028755
chr4	1028810	1028810	10	10.0%_70r	chr4	1028810	CG11077	EXON	0	63	7	0	70	0	262	0	0	262	7	70	0	262	chr4_1028810
chr4	1028832	1028832	8.6	8.6%_81r	chr4	1028832	CG11077	EXON	0	74	7	0	81	0	215	0	0	215	7	81	0	215	chr4_1028832
chr4	1028839	1028839	37.7	37.7%_77r	chr4	1028839	CG11077	EXON	0	48	29	0	77	0	266	0	0	266	29	77	0	266	chr4_1028839
chr4	1028846	1028846	63	63.0%_73r	chr4	1028846	CG11077	EXON	0	27	46	0	73	0	268	0	0	268	46	73	0	268	chr4_1028846
chr4	1028848	1028848	9.5	9.5%_74r	chr4	1028848	CG11077	EXON	0	67	7	0	74	0	277	0	0	277	7	74	0	277	chr4_1028848
chr4	1028867	1028867	9.2	9.2%_87r	chr4	1028867	CG11077	EXON	0	79	8	0	87	0	377	0	0	377	8	87	0	377	chr4_1028867
chr4	1028891	1028891	22.8	22.8%_101r	chr4	1028891	CG11077	EXON	0	78	23	0	101	0	403	0	1	404	23	101	0	404	chr4_1028891
chr4	1028895	1028895	11.2	11.2%_98r	chr4	1028895	CG11077	EXON	0	87	11	0	98	0	419	0	1	420	11	98	0	420	chr4_1028895
chr4	1028909	1028909	11	11.0%_91r	chr4	1028909	CG11077	EXON	0	81	10	0	91	0	326	0	0	326	10	91	0	326	chr4_1028909
chr4	1028977	1028977	25.3	25.3%_75r	chr4	1028977	CG11077	EXON	0	56	19	0	75	0	409	0	1	410	19	75	0	410	chr4_1028977
chr4	1029008	1029008	7.4	7.4%_68r	chr4	1029008	CG11077	EXON	0	63	5	0	68	0	303	0	0	303	5	68	0	303	chr4_1029008
chr4	1227204	1227204	13.6	13.6%_22r	chr4	1227204	Dyrk3	EXON	0	19	3	0	22	0	88	0	0	88	3	22	0	88	chr4_1227204
chr4	328840	328840	8	8.0%_25r	chr4	328840	PMCA	EXON	0	23	2	0	25	0	25	0	0	25	2	25	0	25	chr4_328840
chr4	328860	328860	16.7	16.7%_36r	chr4	328860	PMCA	EXON	1	29	6	0	36	0	42	0	0	42	6	36	0	42	chr4_328860
chr4	328983	328983	12.5	12.5%_32r	chr4	328983	PMCA	EXON	0	28	4	0	32	0	61	0	0	61	4	32	0	61	chr4_328983
chr4	328996	328996	10.7	10.7%_28r	chr4	328996	PMCA	EXON	0	25	3	0	28	0	56	0	0	56	3	28	0	56	chr4_328996
chr4	329044	329044	10.7	10.7%_28r	chr4	329044	PMCA	EXON	0	25	3	0	28	0	10	0	0	10	3	28	0	10	chr4_329044
chr4	329056	329056	9.1	9.1%_33r	chr4	329056	PMCA	EXON	0	30	3	0	33	0	28	0	0	28	3	33	0	28	chr4_329056
chr4	329083	329083	6.7	6.7%_30r	chr4	329083	PMCA	EXON	0	28	2	0	30	0	67	0	0	67	2	30	0	67	chr4_329083
chr4	329094	329094	6.2	6.2%_32r	chr4	329094	PMCA	EXON	0	30	2	0	32	0	72	0	0	72	2	32	0	72	chr4_329094
chr4	329143	329143	39.5	39.5%_43r	chr4	329143	PMCA	EXON	0	26	17	0	43	0	83	0	0	83	17	43	0	83	chr4_329143
chr4	329158	329158	22.2	22.2%_45r	chr4	329158	PMCA	EXON	0	35	10	0	45	0	91	0	0	91	10	45	0	91	chr4_329158
chr4	329189	329189	7.1	7.1%_56r	chr4	329189	PMCA	EXON	0	52	4	0	56	0	102	0	0	102	4	56	0	102	chr4_329189
chr4	329213	329213	18.4	18.4%_38r	chr4	329213	PMCA	EXON	0	31	7	0	38	0	65	0	0	65	7	38	0	65	chr4_329213
chr4	329232	329232	14.5	14.5%_55r	chr4	329232	PMCA	EXON	0	47	8	0	55	1	89	0	0	90	8	55	0	90	chr4_329232
chr4	329295	329295	10.6	10.6%_66r	chr4	329295	PMCA	EXON	0	58	7	1	66	0	85	0	0	85	7	66	0	85	chr4_329295
chr4	329298	329298	7.8	7.8%_77r	chr4	329298	PMCA	EXON	0	71	6	0	77	0	93	0	0	93	6	77	0	93	chr4_329298
chr4	329340	329340	6.3	6.3%_63r	chr4	329340	PMCA	EXON	0	59	4	0	63	0	91	0	0	91	4	63	0	91	chr4_329340
chr4	329343	329343	6.3	6.3%_63r	chr4	329343	PMCA	EXON	0	59	4	0	63	0	102	0	0	102	4	63	0	102	chr4_329343
chr4	329357	329357	37.5	37.5%_64r	chr4	329357	PMCA	EXON	0	40	24	0	64	0	92	0	0	92	24	64	0	92	chr4_329357
chr4	329403	329403	8.8	8.8%_68r	chr4	329403	PMCA	EXON	0	62	6	0	68	0	66	0	0	66	6	68	0	66	chr4_329403
chr4	329423	329423	6.1	6.1%_66r	chr4	329423	PMCA	EXON	0	62	4	0	66	0	84	0	0	84	4	66	0	84	chr4_329423
chr4	330294	330294	7.8	7.8%_51r	chr4	330294	PMCA	EXON	0	47	4	0	51	0	108	0	0	108	4	51	0	108	chr4_330294
chr4	330298	330298	7.5	7.5%_53r	chr4	330298	PMCA	EXON	0	49	4	0	53	0	115	0	0	115	4	53	0	115	chr4_330298
chr4	330319	330319	7.3	7.3%_41r	chr4	330319	PMCA	EXON	0	38	3	0	41	0	87	0	0	87	3	41	0	87	chr4_330319
chr4	330334	330334	6	6.0%_50r	chr4	330334	PMCA	EXON	0	47	3	0	50	0	86	0	0	86	3	50	0	86	chr4_330334
chr4	330337	330337	14	14.0%_50r	chr4	330337	PMCA	EXON	0	43	7	0	50	0	86	0	0	86	7	50	0	86	chr4_330337
chr4	331260	331260	8.3	8.3%_24r	chr4	331260	PMCA	EXON	0	22	2	0	24	0	87	0	0	87	2	24	0	87	chr4_331260
chr4	331280	331280	16.7	16.7%_24r	chr4	331280	PMCA	EXON	0	20	4	0	24	0	84	0	0	84	4	24	0	84	chr4_331280
chr4	331307	331307	10	10.0%_20r	chr4	331307	PMCA	EXON	0	18	2	0	20	0	95	0	0	95	2	20	0	95	chr4_331307
chr4	331424	331424	6.7	6.7%_30r	chr4	331424	PMCA	EXON	0	28	2	0	30	0	112	0	0	112	2	30	0	112	chr4_331424
chr4	331442	331442	6.5	6.5%_31r	chr4	331442	PMCA	EXON	0	29	2	0	31	0	131	0	0	131	2	31	0	131	chr4_331442
chr4	331447	331447	58.1	58.1%_31r	chr4	331447	PMCA	EXON	0	13	18	0	31	1	120	0	0	121	18	31	0	121	chr4_331447
chr4	331450	331450	6.2	6.2%_32r	chr4	331450	PMCA	EXON	0	30	2	0	32	0	119	0	0	119	2	32	0	119	chr4_331450
chr4	331458	331458	8.2	8.2%_49r	chr4	331458	PMCA	EXON	0	45	4	0	49	0	141	0	0	141	4	49	0	141	chr4_331458
chr4	331471	331471	10	10.0%_50r	chr4	331471	PMCA	EXON	1	44	5	0	50	0	125	0	0	125	5	50	0	125	chr4_331471
chr4	331472	331472	8.5	8.5%_47r	chr4	331472	PMCA	EXON	0	43	4	0	47	0	125	0	0	125	4	47	0	125	chr4_331472
chr4	331499	331499	26.7	26.7%_45r	chr4	331499	PMCA	EXON	0	33	12	0	45	0	128	0	1	129	12	45	0	129	chr4_331499
chr4	331508	331508	6.4	6.4%_47r	chr4	331508	PMCA	EXON	0	44	3	0	47	0	124	0	0	124	3	47	0	124	chr4_331508
chr4	331543	331543	7.7	7.7%_39r	chr4	331543	PMCA	EXON	0	36	3	0	39	0	179	0	0	179	3	39	0	179	chr4_331543
chr4	331556	331556	25	25.0%_32r	chr4	331556	PMCA	EXON	0	24	8	0	32	0	150	0	0	150	8	32	0	150	chr4_331556
chr4	331566	331566	16.7	16.7%_30r	chr4	331566	PMCA	EXON	0	25	5	0	30	0	157	0	0	157	5	30	0	157	chr4_331566
chr4	331598	331598	6.2	6.2%_32r	chr4	331598	PMCA	EXON	0	30	2	0	32	0	116	0	0	116	2	32	0	116	chr4_331598
chr4	331657	331657	7.1	7.1%_28r	chr4	331657	PMCA	EXON	0	26	2	0	28	0	90	0	0	90	2	28	0	90	chr4_331657
chr4	331698	331698	6.4	6.4%_47r	chr4	331698	PMCA	EXON	0	44	3	0	47	0	116	0	1	117	3	47	0	117	chr4_331698
chr4	331728	331728	20.8	20.8%_53r	chr4	331728	PMCA	EXON	0	42	11	0	53	0	159	0	0	159	11	53	0	159	chr4_331728
chr4	331737	331737	7	7.0%_57r	chr4	331737	PMCA	EXON	0	53	4	0	57	0	176	0	1	177	4	57	0	177	chr4_331737
chr4	331783	331783	21.9	21.9%_32r	chr4	331783	PMCA	EXON	0	25	7	0	32	0	123	0	0	123	7	32	0	123	chr4_331783
chr4	331824	331824	40.5	40.5%_37r	chr4	331824	PMCA	EXON	0	22	15	0	37	0	98	0	0	98	15	37	0	98	chr4_331824
chr4	331906	331906	11.9	11.9%_67r	chr4	331906	PMCA	EXON	0	59	8	0	67	0	193	0	0	193	8	67	0	193	chr4_331906
chr4	331939	331939	6.2	6.2%_65r	chr4	331939	PMCA	EXON	0	61	4	0	65	0	187	0	0	187	4	65	0	187	chr4_331939
chr4	331967	331967	6.2	6.2%_64r	chr4	331967	PMCA	EXON	0	60	4	0	64	0	126	0	0	126	4	64	0	126	chr4_331967
chr4	342961	342961	14.3	14.3%_49r	chr4	342961	PMCA	EXON	0	42	7	0	49	0	178	0	0	178	7	49	0	178	chr4_342961
chr4	342993	342993	7.3	7.3%_55r	chr4	342993	PMCA	EXON	0	51	4	0	55	0	138	0	0	138	4	55	0	138	chr4_342993
chr4	343023	343023	19.7	19.7%_61r	chr4	343023	PMCA	EXON	0	49	12	0	61	0	248	0	0	248	12	61	0	248	chr4_343023
chr4	349063	349063	30.8	30.8%_26r	chr4	349063	PMCA	EXON	0	18	8	0	26	0	167	0	0	167	8	26	0	167	chr4_349063
chr4	349130	349130	17.5	17.5%_63r	chr4	349130	PMCA	EXON	0	52	11	0	63	0	236	0	0	236	11	63	0	236	chr4_349130
chr4	349244	349244	8.9	8.9%_45r	chr4	349244	PMCA	EXON	0	41	4	0	45	0	255	0	1	256	4	45	0	256	chr4_349244
chr4	349264	349264	11.5	11.5%_26r	chr4	349264	PMCA	EXON	0	23	3	0	26	0	174	0	0	174	3	26	0	174	chr4_349264
chr4	349270	349270	11.1	11.1%_27r	chr4	349270	PMCA	EXON	0	24	3	0	27	0	144	0	0	144	3	27	0	144	chr4_349270
chr4	349302	349302	6.2	6.2%_32r	chr4	349302	PMCA	EXON	0	30	2	0	32	0	81	0	0	81	2	32	0	81	chr4_349302
chr4	349307	349307	6.1	6.1%_33r	chr4	349307	PMCA	EXON	0	31	2	0	33	0	82	0	0	82	2	33	0	82	chr4_349307
chr4	349353	349353	21.1	21.1%_38r	chr4	349353	PMCA	EXON	0	30	8	0	38	1	179	0	0	180	8	38	0	180	chr4_349353
chr4	349356	349356	11.4	11.4%_35r	chr4	349356	PMCA	EXON	0	31	4	0	35	0	183	0	0	183	4	35	0	183	chr4_349356
chr4	349387	349387	8.6	8.6%_35r	chr4	349387	PMCA	EXON	0	32	3	0	35	0	166	0	0	166	3	35	0	166	chr4_349387
chr4	349506	349506	8.7	8.7%_46r	chr4	349506	PMCA	EXON	0	42	4	0	46	0	169	0	0	169	4	46	0	169	chr4_349506
chr4	349513	349513	9.1	9.1%_44r	chr4	349513	PMCA	EXON	0	40	4	0	44	0	186	0	0	186	4	44	0	186	chr4_349513
chr4	349607	349607	7.9	7.9%_38r	chr4	349607	PMCA	EXON	0	35	3	0	38	0	155	0	0	155	3	38	0	155	chr4_349607
chr4	349619	349619	7.1	7.1%_28r	chr4	349619	PMCA	EXON	0	26	2	0	28	0	130	0	0	130	2	28	0	130	chr4_349619
chr4	349623	349623	6.9	6.9%_29r	chr4	349623	PMCA	EXON	0	27	2	0	29	0	135	0	0	135	2	29	0	135	chr4_349623
chr4	349670	349670	35.7	35.7%_28r	chr4	349670	PMCA	EXON	0	18	10	0	28	0	178	0	0	178	10	28	0	178	chr4_349670
chr4	349671	349671	7.1	7.1%_28r	chr4	349671	PMCA	EXON	0	26	2	0	28	0	180	0	0	180	2	28	0	180	chr4_349671
chr4	349745	349745	26.7	26.7%_30r	chr4	349745	PMCA	EXON	0	22	8	0	30	0	152	0	0	152	8	30	0	152	chr4_349745
chr4	349746	349746	12.9	12.9%_31r	chr4	349746	PMCA	EXON	0	27	4	0	31	0	154	0	0	154	4	31	0	154	chr4_349746
chr4	349765	349765	14.6	14.6%_41r	chr4	349765	PMCA	EXON	0	35	6	0	41	0	156	0	0	156	6	41	0	156	chr4_349765
chr4	349803	349803	8.3	8.3%_24r	chr4	349803	PMCA	EXON	0	22	2	0	24	0	172	0	0	172	2	24	0	172	chr4_349803
chr4	349818	349818	13	13.0%_23r	chr4	349818	PMCA	EXON	0	20	3	0	23	0	190	0	0	190	3	23	0	190	chr4_349818
chr4	349819	349819	12.5	12.5%_24r	chr4	349819	PMCA	EXON	0	21	3	0	24	0	195	0	0	195	3	24	0	195	chr4_349819
chr4	349873	349873	18.2	18.2%_33r	chr4	349873	PMCA	EXON	0	27	6	0	33	0	184	0	0	184	6	33	0	184	chr4_349873
chr4	349910	349910	14.3	14.3%_21r	chr4	349910	PMCA	EXON	0	18	3	0	21	0	150	0	0	150	3	21	0	150	chr4_349910
chr4	349912	349912	25	25.0%_20r	chr4	349912	PMCA	EXON	0	15	5	0	20	0	144	0	0	144	5	20	0	144	chr4_349912
chr4	349924	349924	8.3	8.3%_24r	chr4	349924	PMCA	EXON	0	22	2	0	24	0	164	0	0	164	2	24	0	164	chr4_349924
chr4	349931	349931	7.1	7.1%_28r	chr4	349931	PMCA	EXON	0	26	2	0	28	0	194	0	0	194	2	28	0	194	chr4_349931
chr4	349949	349949	11.5	11.5%_26r	chr4	349949	PMCA	EXON	0	23	3	0	26	0	149	0	1	150	3	26	0	150	chr4_349949
chr4	349970	349970	11.1	11.1%_27r	chr4	349970	PMCA	EXON	0	24	3	0	27	0	111	0	0	111	3	27	0	111	chr4_349970
chr4	350032	350032	12.9	12.9%_31r	chr4	350032	PMCA	EXON	0	27	4	0	31	0	186	0	1	187	4	31	0	187	chr4_350032
chr4	350041	350041	6.5	6.5%_31r	chr4	350041	PMCA	EXON	0	29	2	0	31	0	214	0	0	214	2	31	0	214	chr4_350041
chr4	350617	350617	6.8	6.8%_44r	chr4	350617	PMCA	EXON	0	41	3	0	44	0	239	0	0	239	3	44	0	239	chr4_350617
[truncated: 196,048 more rows]

## Sheet: 2-Hrp48-ADAR replicate 2
Chr	Start coordinate	End coordinate	Editing percentage	Concatenation of editing percentage and reads	Chr name	Edit coordinate	Name	Type	A count	T count	C count	G count	Total nt count	A count from wtRNA	T count from WT RNA	C count from WT RNA	G count from WT RNA	Total count from WT RNA	Editbase count	Total nt count	Editbase count from WT RNA	Total nt count from WT Rna	Identifier
chr4	116495	116495	11	11.0%_109r	chr4	116495	Ank	EXON	0	96	12	1	109	0	37	0	0	37	12	109	0	37	chr4_116495
chr4	116529	116529	9.7	9.7%_31r	chr4	116529	Ank	EXON	0	28	3	0	31	0	16	0	0	16	3	31	0	16	chr4_116529
chr4	116616	116616	20.5	20.5%_44r	chr4	116616	Ank	EXON	0	35	9	0	44	0	24	0	0	24	9	44	0	24	chr4_116616
chr4	116725	116725	28.8	28.8%_59r	chr4	116725	Ank	EXON	0	42	17	0	59	0	32	0	0	32	17	59	0	32	chr4_116725
chr4	116736	116736	10.5	10.5%_76r	chr4	116736	Ank	EXON	0	68	8	0	76	1	46	0	0	47	8	76	0	47	chr4_116736
chr4	116745	116745	36.4	36.4%_77r	chr4	116745	Ank	EXON	0	49	28	0	77	0	44	0	0	44	28	77	0	44	chr4_116745
chr4	116797	116797	10.7	10.7%_112r	chr4	116797	Ank	EXON	0	100	12	0	112	0	59	0	0	59	12	112	0	59	chr4_116797
chr4	116816	116816	16	16.0%_75r	chr4	116816	Ank	EXON	0	63	12	0	75	0	45	0	0	45	12	75	0	45	chr4_116816
chr4	116926	116926	9.5	9.5%_42r	chr4	116926	Ank	EXON	0	37	4	1	42	0	20	0	0	20	4	42	0	20	chr4_116926
chr4	116958	116958	10	10.0%_60r	chr4	116958	Ank	EXON	0	54	6	0	60	0	35	0	0	35	6	60	0	35	chr4_116958
chr4	116960	116960	6.8	6.8%_74r	chr4	116960	Ank	EXON	0	69	5	0	74	0	40	0	0	40	5	74	0	40	chr4_116960
chr4	117034	117034	6.2	6.2%_80r	chr4	117034	Ank	EXON	0	75	5	0	80	0	51	0	0	51	5	80	0	51	chr4_117034
chr4	117037	117037	11.4	11.4%_79r	chr4	117037	Ank	EXON	0	70	9	0	79	0	50	0	0	50	9	79	0	50	chr4_117037
chr4	117137	117137	8.5	8.5%_47r	chr4	117137	Ank	EXON	0	43	4	0	47	0	25	0	0	25	4	47	0	25	chr4_117137
chr4	117159	117159	7.2	7.2%_69r	chr4	117159	Ank	EXON	0	64	5	0	69	0	36	0	0	36	5	69	0	36	chr4_117159
chr4	117229	117229	7.7	7.7%_52r	chr4	117229	Ank	EXON	0	48	4	0	52	0	48	0	0	48	4	52	0	48	chr4_117229
chr4	117246	117246	18.2	18.2%_33r	chr4	117246	Ank	EXON	0	27	6	0	33	0	32	0	0	32	6	33	0	32	chr4_117246
chr4	117309	117309	6.5	6.5%_46r	chr4	117309	Ank	EXON	0	43	3	0	46	0	32	0	0	32	3	46	0	32	chr4_117309
chr4	117375	117375	15.6	15.6%_32r	chr4	117375	Ank	EXON	0	27	5	0	32	0	32	0	0	32	5	32	0	32	chr4_117375
chr4	117395	117395	13.8	13.8%_29r	chr4	117395	Ank	EXON	0	25	4	0	29	0	32	0	0	32	4	29	0	32	chr4_117395
chr4	117494	117494	8	8.0%_25r	chr4	117494	Ank	EXON	0	23	2	0	25	0	35	0	0	35	2	25	0	35	chr4_117494
chr4	117501	117501	10.8	10.8%_37r	chr4	117501	Ank	EXON	0	33	4	0	37	0	41	0	0	41	4	37	0	41	chr4_117501
chr4	117536	117536	6.9	6.9%_29r	chr4	117536	Ank	EXON	0	27	2	0	29	0	22	0	0	22	2	29	0	22	chr4_117536
chr4	117579	117579	7.1	7.1%_56r	chr4	117579	Ank	EXON	0	52	4	0	56	0	38	0	0	38	4	56	0	38	chr4_117579
chr4	117682	117682	15.8	15.8%_38r	chr4	117682	Ank	EXON	0	32	6	0	38	0	41	0	0	41	6	38	0	41	chr4_117682
chr4	117835	117835	17.1	17.1%_41r	chr4	117835	Ank	EXON	0	34	7	0	41	0	35	0	0	35	7	41	0	35	chr4_117835
chr4	117903	117903	7.7	7.7%_26r	chr4	117903	Ank	EXON	0	24	2	0	26	0	41	0	0	41	2	26	0	41	chr4_117903
chr4	117912	117912	13.6	13.6%_22r	chr4	117912	Ank	EXON	0	19	3	0	22	0	33	0	0	33	3	22	0	33	chr4_117912
chr4	117981	117981	16	16.0%_25r	chr4	117981	Ank	EXON	0	21	4	0	25	0	17	0	0	17	4	25	0	17	chr4_117981
chr4	118131	118131	38.5	38.5%_26r	chr4	118131	Ank	EXON	0	16	10	0	26	0	30	0	0	30	10	26	0	30	chr4_118131
chr4	118403	118403	6.2	6.2%_48r	chr4	118403	Ank	EXON	0	45	3	0	48	0	34	0	0	34	3	48	0	34	chr4_118403
chr4	118438	118438	12.5	12.5%_32r	chr4	118438	Ank	EXON	0	28	4	0	32	0	24	0	0	24	4	32	0	24	chr4_118438
chr4	118457	118457	8	8.0%_25r	chr4	118457	Ank	EXON	0	23	2	0	25	0	22	0	0	22	2	25	0	22	chr4_118457
chr4	118458	118458	8	8.0%_25r	chr4	118458	Ank	EXON	0	23	2	0	25	0	22	0	0	22	2	25	0	22	chr4_118458
chr4	118461	118461	7.4	7.4%_27r	chr4	118461	Ank	EXON	0	25	2	0	27	0	23	0	0	23	2	27	0	23	chr4_118461
chr4	118598	118598	10	10.0%_20r	chr4	118598	Ank	EXON	0	18	2	0	20	0	10	0	0	10	2	20	0	10	chr4_118598
chr4	118879	118879	8	8.0%_25r	chr4	118879	Ank	EXON	0	23	2	0	25	0	20	0	0	20	2	25	0	20	chr4_118879
chr4	118891	118891	7.7	7.7%_26r	chr4	118891	Ank	EXON	0	24	2	0	26	0	19	0	0	19	2	26	0	19	chr4_118891
chr4	118892	118892	7.4	7.4%_27r	chr4	118892	Ank	EXON	0	25	2	0	27	0	19	0	0	19	2	27	0	19	chr4_118892
chr4	119953	119953	8.3	8.3%_24r	chr4	119953	Ank	EXON	0	22	2	0	24	0	26	0	0	26	2	24	0	26	chr4_119953
chr4	120001	120001	7.1	7.1%_42r	chr4	120001	Ank	EXON	0	39	3	0	42	0	18	0	0	18	3	42	0	18	chr4_120001
chr4	120146	120146	9.7	9.7%_31r	chr4	120146	Ank	EXON	0	28	3	0	31	0	30	0	0	30	3	31	0	30	chr4_120146
chr4	120147	120147	21.9	21.9%_32r	chr4	120147	Ank	EXON	0	25	7	0	32	0	31	0	0	31	7	32	0	31	chr4_120147
chr4	120921	120921	13.5	13.5%_37r	chr4	120921	Ank	EXON	0	32	5	0	37	0	27	0	0	27	5	37	0	27	chr4_120921
chr4	120922	120922	8.1	8.1%_37r	chr4	120922	Ank	EXON	0	34	3	0	37	0	27	0	0	27	3	37	0	27	chr4_120922
chr4	120968	120968	8	8.0%_25r	chr4	120968	Ank	EXON	0	23	2	0	25	0	26	0	0	26	2	25	0	26	chr4_120968
chr4	121000	121000	12.5	12.5%_24r	chr4	121000	Ank	EXON	0	21	3	0	24	0	25	0	0	25	3	24	0	25	chr4_121000
chr4	121066	121066	12.5	12.5%_32r	chr4	121066	Ank	EXON	0	28	4	0	32	0	35	0	0	35	4	32	0	35	chr4_121066
chr4	121099	121099	25	25.0%_20r	chr4	121099	Ank	EXON	0	15	5	0	20	0	22	0	0	22	5	20	0	22	chr4_121099
chr4	121114	121114	24	24.0%_25r	chr4	121114	Ank	EXON	0	19	6	0	25	0	29	0	0	29	6	25	0	29	chr4_121114
chr4	121137	121137	7.1	7.1%_42r	chr4	121137	Ank	EXON	0	39	3	0	42	0	45	0	0	45	3	42	0	45	chr4_121137
chr4	121172	121172	6.7	6.7%_30r	chr4	121172	Ank	EXON	0	28	2	0	30	0	36	0	0	36	2	30	0	36	chr4_121172
chr4	121210	121210	6.1	6.1%_33r	chr4	121210	Ank	EXON	0	31	2	0	33	0	29	0	0	29	2	33	0	29	chr4_121210
chr4	121233	121233	13.3	13.3%_30r	chr4	121233	Ank	EXON	0	26	4	0	30	1	26	0	0	27	4	30	0	27	chr4_121233
chr4	121392	121392	14.3	14.3%_42r	chr4	121392	Ank	EXON	0	36	6	0	42	0	39	0	1	40	6	42	0	40	chr4_121392
chr4	121439	121439	17.4	17.4%_46r	chr4	121439	Ank	EXON	0	38	8	0	46	0	32	0	0	32	8	46	0	32	chr4_121439
chr4	121466	121466	7.1	7.1%_42r	chr4	121466	Ank	EXON	0	39	3	0	42	0	25	0	0	25	3	42	0	25	chr4_121466
chr4	121524	121524	9.7	9.7%_31r	chr4	121524	Ank	EXON	0	28	3	0	31	0	22	0	0	22	3	31	0	22	chr4_121524
chr4	121533	121533	10.7	10.7%_28r	chr4	121533	Ank	EXON	0	25	3	0	28	0	23	0	0	23	3	28	0	23	chr4_121533
chr4	121538	121538	8.3	8.3%_24r	chr4	121538	Ank	EXON	0	22	2	0	24	0	21	0	0	21	2	24	0	21	chr4_121538
chr4	121605	121605	9.3	9.3%_43r	chr4	121605	Ank	EXON	0	39	4	0	43	0	31	0	0	31	4	43	0	31	chr4_121605
chr4	121648	121648	14.6	14.6%_41r	chr4	121648	Ank	EXON	0	35	6	0	41	0	45	0	0	45	6	41	0	45	chr4_121648
chr4	121668	121668	6.8	6.8%_59r	chr4	121668	Ank	EXON	0	55	4	0	59	0	37	0	0	37	4	59	0	37	chr4_121668
chr4	121736	121736	13	13.0%_23r	chr4	121736	Ank	EXON	0	20	3	0	23	0	16	0	0	16	3	23	0	16	chr4_121736
chr4	121904	121904	14.6	14.6%_41r	chr4	121904	Ank	EXON	0	35	6	0	41	0	26	0	0	26	6	41	0	26	chr4_121904
chr4	121915	121915	6.5	6.5%_46r	chr4	121915	Ank	EXON	0	43	3	0	46	0	27	0	0	27	3	46	0	27	chr4_121915
chr4	121949	121949	12.9	12.9%_62r	chr4	121949	Ank	EXON	0	54	8	0	62	0	42	0	0	42	8	62	0	42	chr4_121949
chr4	122336	122336	7.3	7.3%_41r	chr4	122336	Ank	EXON	0	38	3	0	41	0	30	0	0	30	3	41	0	30	chr4_122336
chr4	122337	122337	7.3	7.3%_41r	chr4	122337	Ank	EXON	0	38	3	0	41	0	30	0	0	30	3	41	0	30	chr4_122337
chr4	122378	122378	9.1	9.1%_33r	chr4	122378	Ank	EXON	0	29	3	1	33	0	35	0	0	35	3	33	0	35	chr4_122378
chr4	122388	122388	10.3	10.3%_39r	chr4	122388	Ank	EXON	0	35	4	0	39	0	32	0	0	32	4	39	0	32	chr4_122388
chr4	122444	122444	8.6	8.6%_35r	chr4	122444	Ank	EXON	1	31	3	0	35	0	35	0	0	35	3	35	0	35	chr4_122444
chr4	122459	122459	12.1	12.1%_33r	chr4	122459	Ank	EXON	0	29	4	0	33	0	35	0	0	35	4	33	0	35	chr4_122459
chr4	122489	122489	8.3	8.3%_36r	chr4	122489	Ank	EXON	0	33	3	0	36	0	30	0	0	30	3	36	0	30	chr4_122489
chr4	122493	122493	10.5	10.5%_38r	chr4	122493	Ank	EXON	0	34	4	0	38	0	30	0	0	30	4	38	0	30	chr4_122493
chr4	122496	122496	15.9	15.9%_44r	chr4	122496	Ank	EXON	0	37	7	0	44	0	34	0	0	34	7	44	0	34	chr4_122496
chr4	122498	122498	17	17.0%_47r	chr4	122498	Ank	EXON	0	39	8	0	47	0	37	0	0	37	8	47	0	37	chr4_122498
chr4	122549	122549	46.7	46.7%_30r	chr4	122549	Ank	EXON	0	16	14	0	30	0	47	0	0	47	14	30	0	47	chr4_122549
chr4	122592	122592	22.9	22.9%_48r	chr4	122592	Ank	EXON	0	37	11	0	48	0	31	0	1	32	11	48	0	32	chr4_122592
chr4	122648	122648	16.7	16.7%_24r	chr4	122648	Ank	EXON	0	20	4	0	24	0	25	0	0	25	4	24	0	25	chr4_122648
chr4	122697	122697	20	20.0%_35r	chr4	122697	Ank	EXON	0	28	7	0	35	0	34	0	0	34	7	35	0	34	chr4_122697
chr4	122747	122747	6.9	6.9%_29r	chr4	122747	Ank	EXON	0	27	2	0	29	0	29	0	0	29	2	29	0	29	chr4_122747
chr4	122899	122899	11.5	11.5%_52r	chr4	122899	Ank	EXON	1	45	6	0	52	0	47	0	0	47	6	52	0	47	chr4_122899
chr4	123131	123131	6.2	6.2%_48r	chr4	123131	Ank	EXON	0	45	3	0	48	0	44	0	0	44	3	48	0	44	chr4_123131
chr4	123192	123192	8.6	8.6%_35r	chr4	123192	Ank	EXON	0	32	3	0	35	0	43	0	0	43	3	35	0	43	chr4_123192
chr4	123245	123245	30	30.0%_60r	chr4	123245	Ank	EXON	0	42	18	0	60	0	52	0	0	52	18	60	0	52	chr4_123245
chr4	123265	123265	20.8	20.8%_53r	chr4	123265	Ank	EXON	0	41	11	1	53	0	40	0	0	40	11	53	0	40	chr4_123265
chr4	123272	123272	6.7	6.7%_45r	chr4	123272	Ank	EXON	0	42	3	0	45	0	38	0	0	38	3	45	0	38	chr4_123272
chr4	123399	123399	6.1	6.1%_33r	chr4	123399	Ank	EXON	0	31	2	0	33	0	47	0	0	47	2	33	0	47	chr4_123399
chr4	129349	129349	6.5	6.5%_31r	chr4	129349	Ank	EXON	0	29	2	0	31	0	34	0	0	34	2	31	0	34	chr4_129349
chr4	778674	778674	14.8	14.8%_27r	chr4	778674	MED26	EXON	0	23	4	0	27	0	14	0	0	14	4	27	0	14	chr4_778674
chr4	778679	778679	15.6	15.6%_32r	chr4	778679	MED26	EXON	0	27	5	0	32	0	14	0	0	14	5	32	0	14	chr4_778679
chr4	778684	778684	6.9	6.9%_29r	chr4	778684	MED26	EXON	0	27	2	0	29	0	14	0	0	14	2	29	0	14	chr4_778684
chr4	778943	778943	36.7	36.7%_30r	chr4	778943	MED26	EXON	0	19	11	0	30	0	17	0	0	17	11	30	0	17	chr4_778943
chr4	779011	779011	14.3	14.3%_28r	chr4	779011	MED26	EXON	0	24	4	0	28	0	13	0	0	13	4	28	0	13	chr4_779011
chr4	779130	779130	10.7	10.7%_28r	chr4	779130	MED26	EXON	0	24	3	1	28	0	11	0	0	11	3	28	0	11	chr4_779130
chr4	779150	779150	6.1	6.1%_33r	chr4	779150	MED26	EXON	0	31	2	0	33	0	13	0	0	13	2	33	0	13	chr4_779150
chr4	779171	779171	19.6	19.6%_46r	chr4	779171	MED26	EXON	0	37	9	0	46	0	13	0	0	13	9	46	0	13	chr4_779171
chr4	779266	779266	8.3	8.3%_24r	chr4	779266	MED26	EXON	0	22	2	0	24	0	13	0	0	13	2	24	0	13	chr4_779266
chr4	779507	779507	32.1	32.1%_28r	chr4	779507	MED26	EXON	0	19	9	0	28	0	13	0	0	13	9	28	0	13	chr4_779507
chr4	779510	779510	37.9	37.9%_29r	chr4	779510	MED26	EXON	0	18	11	0	29	0	13	0	0	13	11	29	0	13	chr4_779510
chr4	779518	779518	6.2	6.2%_32r	chr4	779518	MED26	EXON	0	30	2	0	32	0	14	0	0	14	2	32	0	14	chr4_779518
chr4	779558	779558	28.6	28.6%_35r	chr4	779558	MED26	EXON	0	25	10	0	35	0	16	0	0	16	10	35	0	16	chr4_779558
chr4	780305	780305	9.5	9.5%_21r	chr4	780305	MED26	EXON	0	19	2	0	21	0	13	0	0	13	2	21	0	13	chr4_780305
chr4	780602	780602	12.5	12.5%_24r	chr4	780602	MED26	EXON	0	21	3	0	24	0	12	0	0	12	3	24	0	12	chr4_780602
chr4	780800	780800	9.1	9.1%_22r	chr4	780800	MED26	EXON	0	20	2	0	22	0	17	0	0	17	2	22	0	17	chr4_780800
chr4	780871	780871	31	31.0%_29r	chr4	780871	MED26	EXON	0	20	9	0	29	0	27	0	0	27	9	29	0	27	chr4_780871
chr4	781054	781054	22.7	22.7%_22r	chr4	781054	MED26	EXON	0	17	5	0	22	0	15	0	0	15	5	22	0	15	chr4_781054
chr4	781206	781206	10	10.0%_30r	chr4	781206	MED26	EXON	0	27	3	0	30	0	13	0	0	13	3	30	0	13	chr4_781206
chr4	781214	781214	11.1	11.1%_27r	chr4	781214	MED26	EXON	0	24	3	0	27	0	11	0	0	11	3	27	0	11	chr4_781214
chr4	781376	781376	7.7	7.7%_26r	chr4	781376	MED26	EXON	0	24	2	0	26	0	30	0	0	30	2	26	0	30	chr4_781376
chr4	781389	781389	6.1	6.1%_33r	chr4	781389	MED26	EXON	0	31	2	0	33	0	22	0	0	22	2	33	0	22	chr4_781389
chr4	781454	781454	6.9	6.9%_29r	chr4	781454	MED26	EXON	0	27	2	0	29	0	19	0	0	19	2	29	0	19	chr4_781454
chr4	781472	781472	12.5	12.5%_24r	chr4	781472	MED26	EXON	0	21	3	0	24	0	13	0	0	13	3	24	0	13	chr4_781472
chr4	781491	781491	11.8	11.8%_34r	chr4	781491	MED26	EXON	0	30	4	0	34	0	20	0	0	20	4	34	0	20	chr4_781491
chr4	781528	781528	25	25.0%_24r	chr4	781528	MED26	EXON	0	18	6	0	24	0	17	0	0	17	6	24	0	17	chr4_781528
chr4	781529	781529	8.3	8.3%_24r	chr4	781529	MED26	EXON	0	22	2	0	24	0	16	0	0	16	2	24	0	16	chr4_781529
chr4	783181	783181	20	20.0%_40r	chr4	783181	MED26	EXON	0	32	8	0	40	0	20	0	0	20	8	40	0	20	chr4_783181
chr4	783182	783182	20	20.0%_40r	chr4	783182	MED26	EXON	0	32	8	0	40	0	20	0	0	20	8	40	0	20	chr4_783182
chr4	783186	783186	12.5	12.5%_32r	chr4	783186	MED26	EXON	0	28	4	0	32	0	20	0	0	20	4	32	0	20	chr4_783186
chr4	783214	783214	34.5	34.5%_29r	chr4	783214	MED26	EXON	0	19	10	0	29	0	11	0	0	11	10	29	0	11	chr4_783214
chr4	783330	783330	7.1	7.1%_28r	chr4	783330	MED26	EXON	0	26	2	0	28	0	13	0	0	13	2	28	0	13	chr4_783330
chr4	783395	783395	6.9	6.9%_29r	chr4	783395	MED26	EXON	0	27	2	0	29	0	19	0	0	19	2	29	0	19	chr4_783395
chr4	783408	783408	6.7	6.7%_30r	chr4	783408	MED26	EXON	0	28	2	0	30	0	11	0	0	11	2	30	0	11	chr4_783408
chr4	783428	783428	13.8	13.8%_29r	chr4	783428	MED26	EXON	0	25	4	0	29	0	11	0	0	11	4	29	0	11	chr4_783428
chr4	783458	783458	7.4	7.4%_27r	chr4	783458	MED26	EXON	0	25	2	0	27	0	17	0	0	17	2	27	0	17	chr4_783458
chr4	783483	783483	6.7	6.7%_30r	chr4	783483	MED26	EXON	0	28	2	0	30	0	12	0	0	12	2	30	0	12	chr4_783483
chr4	783497	783497	7.7	7.7%_39r	chr4	783497	MED26	EXON	0	36	3	0	39	0	14	0	0	14	3	39	0	14	chr4_783497
chr4	783508	783508	26.5	26.5%_34r	chr4	783508	MED26	EXON	0	25	9	0	34	0	16	0	0	16	9	34	0	16	chr4_783508
chr4	783687	783687	46.2	46.2%_26r	chr4	783687	MED26	EXON	0	14	12	0	26	0	15	0	0	15	12	26	0	15	chr4_783687
chr4	783775	783775	7.7	7.7%_39r	chr4	783775	MED26	EXON	0	36	3	0	39	0	10	0	0	10	3	39	0	10	chr4_783775
chr4	783777	783777	31.6	31.6%_38r	chr4	783777	MED26	EXON	0	25	12	1	38	0	10	0	0	10	12	38	0	10	chr4_783777
chr4	783794	783794	60	60.0%_20r	chr4	783794	MED26	EXON	0	8	12	0	20	0	11	0	0	11	12	20	0	11	chr4_783794
chr4	783805	783805	8.7	8.7%_23r	chr4	783805	MED26	EXON	0	21	2	0	23	0	14	0	0	14	2	23	0	14	chr4_783805
chr4	786160	786160	32.3	32.3%_62r	chr4	786160	MED26	INTRON	0	42	20	0	62	0	20	0	0	20	20	62	0	20	chr4_786160
chr4	786215	786215	10.2	10.2%_59r	chr4	786215	MED26	EXON	0	53	6	0	59	0	15	0	0	15	6	59	0	15	chr4_786215
chr4	786258	786258	12.5	12.5%_72r	chr4	786258	MED26	EXON	0	63	9	0	72	0	21	0	0	21	9	72	0	21	chr4_786258
chr4	786296	786296	6.2	6.2%_65r	chr4	786296	MED26	EXON	0	61	4	0	65	0	23	0	0	23	4	65	0	23	chr4_786296
chr4	786426	786426	7.1	7.1%_155r	chr4	786426	MED26	EXON	0	144	11	0	155	0	54	0	0	54	11	155	0	54	chr4_786426
chr4	786715	786715	27.9	27.9%_136r	chr4	786715	MED26	EXON	0	98	38	0	136	0	42	0	1	43	38	136	0	43	chr4_786715
chr4	786801	786801	9.2	9.2%_109r	chr4	786801	MED26	EXON	0	99	10	0	109	0	46	0	0	46	10	109	0	46	chr4_786801
chr4	786802	786802	10.1	10.1%_109r	chr4	786802	MED26	EXON	0	98	11	0	109	0	46	0	0	46	11	109	0	46	chr4_786802
chr4	786812	786812	28.1	28.1%_96r	chr4	786812	MED26	EXON	0	69	27	0	96	0	33	0	0	33	27	96	0	33	chr4_786812
chr4	786879	786879	8.8	8.8%_125r	chr4	786879	MED26	EXON	0	114	11	0	125	0	42	0	0	42	11	125	0	42	chr4_786879
chr4	503863	503863	11.1	11.1%_27r	chr4	503863	zfh2	EXON	24	0	0	3	27	29	0	0	0	29	3	27	0	29	chr4_503863
chr4	503900	503900	6.1	6.1%_33r	chr4	503900	zfh2	EXON	31	0	0	2	33	29	0	0	0	29	2	33	0	29	chr4_503900
chr4	504118	504118	6.3	6.3%_79r	chr4	504118	zfh2	EXON	74	0	0	5	79	78	0	0	0	78	5	79	0	78	chr4_504118
chr4	504129	504129	6.5	6.5%_77r	chr4	504129	zfh2	EXON	72	0	0	5	77	76	0	0	0	76	5	77	0	76	chr4_504129
chr4	504132	504132	9.4	9.4%_64r	chr4	504132	zfh2	EXON	58	0	0	6	64	60	0	0	0	60	6	64	0	60	chr4_504132
chr4	521531	521531	17.6	17.6%_74r	chr4	521531	zfh2	EXON	61	0	0	13	74	82	0	0	0	82	13	74	0	82	chr4_521531
chr4	521561	521561	8.2	8.2%_97r	chr4	521561	zfh2	EXON	89	0	0	8	97	119	0	0	0	119	8	97	0	119	chr4_521561
chr4	521854	521854	6	6.0%_100r	chr4	521854	zfh2	EXON	94	0	0	6	100	105	0	0	0	105	6	100	0	105	chr4_521854
chr4	521855	521855	7.8	7.8%_102r	chr4	521855	zfh2	EXON	94	0	0	8	102	105	0	0	0	105	8	102	0	105	chr4_521855
chr4	521939	521939	28.9	28.9%_114r	chr4	521939	zfh2	EXON	81	0	0	33	114	162	0	0	0	162	33	114	0	162	chr4_521939
chr4	522185	522185	28.6	28.6%_56r	chr4	522185	zfh2	EXON	40	0	0	16	56	52	0	0	0	52	16	56	0	52	chr4_522185
chr4	522262	522262	17.3	17.3%_127r	chr4	522262	zfh2	EXON	105	0	0	22	127	145	1	0	0	146	22	127	0	146	chr4_522262
chr4	522425	522425	7.1	7.1%_99r	chr4	522425	zfh2	EXON	92	0	0	7	99	111	0	0	0	111	7	99	0	111	chr4_522425
chr4	522569	522569	7.8	7.8%_51r	chr4	522569	zfh2	EXON	47	0	0	4	51	65	0	0	0	65	4	51	0	65	chr4_522569
chr4	537580	537580	35.7	35.7%_56r	chr4	537580	zfh2	EXON	36	0	0	20	56	66	0	0	0	66	20	56	0	66	chr4_537580
chr4	537650	537650	11.1	11.1%_54r	chr4	537650	zfh2	EXON	48	0	0	6	54	50	0	0	0	50	6	54	0	50	chr4_537650
chr4	537662	537662	7.5	7.5%_53r	chr4	537662	zfh2	EXON	49	0	0	4	53	39	0	0	0	39	4	53	0	39	chr4_537662
chr4	537742	537742	8.3	8.3%_24r	chr4	537742	zfh2	EXON	22	0	0	2	24	30	0	0	0	30	2	24	0	30	chr4_537742
chr4	537764	537764	7.7	7.7%_39r	chr4	537764	zfh2	EXON	36	0	0	3	39	29	0	0	0	29	3	39	0	29	chr4_537764
chr4	537821	537821	9.1	9.1%_66r	chr4	537821	zfh2	EXON	60	0	0	6	66	62	0	0	0	62	6	66	0	62	chr4_537821
chr4	537823	537823	14.5	14.5%_62r	chr4	537823	zfh2	EXON	53	0	0	9	62	62	0	0	0	62	9	62	0	62	chr4_537823
chr4	537972	537972	10.4	10.4%_48r	chr4	537972	zfh2	EXON	43	0	0	5	48	46	0	0	0	46	5	48	0	46	chr4_537972
chr4	537985	537985	28.9	28.9%_45r	chr4	537985	zfh2	EXON	31	1	0	13	45	44	0	0	0	44	13	45	0	44	chr4_537985
chr4	538108	538108	47.1	47.1%_34r	chr4	538108	zfh2	EXON	18	0	0	16	34	61	0	0	0	61	16	34	0	61	chr4_538108
chr4	538130	538130	11.8	11.8%_51r	chr4	538130	zfh2	EXON	45	0	0	6	51	56	0	0	0	56	6	51	0	56	chr4_538130
chr4	538131	538131	9.8	9.8%_51r	chr4	538131	zfh2	EXON	46	0	0	5	51	56	0	0	0	56	5	51	0	56	chr4_538131
chr4	538157	538157	37.3	37.3%_59r	chr4	538157	zfh2	EXON	37	0	0	22	59	37	0	0	0	37	22	59	0	37	chr4_538157
chr4	538158	538158	10.5	10.5%_57r	chr4	538158	zfh2	EXON	51	0	0	6	57	36	0	0	0	36	6	57	0	36	chr4_538158
chr4	538177	538177	7.3	7.3%_41r	chr4	538177	zfh2	EXON	37	0	1	3	41	28	0	0	0	28	3	41	0	28	chr4_538177
chr4	538188	538188	10.5	10.5%_38r	chr4	538188	zfh2	EXON	34	0	0	4	38	41	0	0	0	41	4	38	0	41	chr4_538188
chr4	538208	538208	7.7	7.7%_39r	chr4	538208	zfh2	EXON	36	0	0	3	39	42	0	0	0	42	3	39	0	42	chr4_538208
chr4	538223	538223	7.1	7.1%_28r	chr4	538223	zfh2	EXON	26	0	0	2	28	28	0	0	0	28	2	28	0	28	chr4_538223
chr4	538224	538224	6.9	6.9%_29r	chr4	538224	zfh2	EXON	27	0	0	2	29	28	0	0	0	28	2	29	0	28	chr4_538224
chr4	538231	538231	11.5	11.5%_26r	chr4	538231	zfh2	EXON	23	0	0	3	26	33	0	0	0	33	3	26	0	33	chr4_538231
chr4	538232	538232	8.6	8.6%_35r	chr4	538232	zfh2	EXON	32	0	0	3	35	38	1	0	0	39	3	35	0	39	chr4_538232
chr4	538237	538237	16.3	16.3%_43r	chr4	538237	zfh2	EXON	36	0	0	7	43	41	0	0	0	41	7	43	0	41	chr4_538237
chr4	315013	315013	47.8	47.8%_23r	chr4	315013	CG32850	EXON	12	0	0	11	23	16	0	0	0	16	11	23	0	16	chr4_315013
chr4	315117	315117	11.4	11.4%_176r	chr4	315117	CG32850	EXON	156	0	0	20	176	81	0	0	0	81	20	176	0	81	chr4_315117
chr4	316412	316412	12.5	12.5%_160r	chr4	316412	CG32850	EXON	140	0	0	20	160	64	0	0	0	64	20	160	0	64	chr4_316412
chr4	316417	316417	10.7	10.7%_150r	chr4	316417	CG32850	EXON	133	1	0	16	150	68	0	0	0	68	16	150	0	68	chr4_316417
chr4	316423	316423	7.9	7.9%_165r	chr4	316423	CG32850	EXON	152	0	0	13	165	70	0	0	0	70	13	165	0	70	chr4_316423
chr4	316505	316505	8.2	8.2%_245r	chr4	316505	CG32850	EXON	225	0	0	20	245	99	0	0	0	99	20	245	0	99	chr4_316505
chr4	319466	319466	7	7.0%_287r	chr4	319466	CG32850	EXON	267	0	0	20	287	130	0	0	0	130	20	287	0	130	chr4_319466
chr4	319553	319553	11.3	11.3%_194r	chr4	319553	CG32850	EXON	172	0	0	22	194	63	0	0	0	63	22	194	0	63	chr4_319553
chr4	319554	319554	22.1	22.1%_199r	chr4	319554	CG32850	EXON	154	1	0	44	199	68	0	0	0	68	44	199	0	68	chr4_319554
chr4	319596	319596	9.9	9.9%_334r	chr4	319596	CG32850	EXON	301	0	0	33	334	122	0	0	0	122	33	334	0	122	chr4_319596
chr4	319699	319699	11.9	11.9%_438r	chr4	319699	CG32850	EXON	385	1	0	52	438	181	0	0	0	181	52	438	0	181	chr4_319699
chr4	319736	319736	6.6	6.6%_320r	chr4	319736	CG32850	EXON	299	0	0	21	320	128	0	0	0	128	21	320	0	128	chr4_319736
chr4	319857	319857	6.7	6.7%_285r	chr4	319857	CG32850	EXON	266	0	0	19	285	88	1	0	0	89	19	285	0	89	chr4_319857
chr4	319878	319878	11	11.0%_309r	chr4	319878	CG32850	EXON	274	1	0	34	309	109	1	0	0	110	34	309	0	110	chr4_319878
chr4	319935	319935	15	15.0%_147r	chr4	319935	CG32850	EXON	124	0	1	22	147	50	0	0	0	50	22	147	0	50	chr4_319935
chr4	1033064	1033064	9.1	9.1%_1403r	chr4	1033064	ATPsyn-beta	EXON	1274	1	0	128	1403	621	0	0	0	621	128	1403	0	621	chr4_1033064
chr4	1033366	1033366	6.5	6.5%_1444r	chr4	1033366	ATPsyn-beta	EXON	1349	1	0	94	1444	555	0	1	0	556	94	1444	0	556	chr4_1033366
chr4	1034232	1034232	9.1	9.1%_1370r	chr4	1034232	ATPsyn-beta	EXON	1243	2	0	125	1370	631	0	0	0	631	125	1370	0	631	chr4_1034232
chr4	1034322	1034322	12	12.0%_1553r	chr4	1034322	ATPsyn-beta	EXON	1365	1	1	186	1553	760	1	0	0	761	186	1553	0	761	chr4_1034322
chr4	1034416	1034416	12.5	12.5%_1376r	chr4	1034416	ATPsyn-beta	EXON	1203	0	1	172	1376	696	1	1	0	698	172	1376	0	698	chr4_1034416
chr4	1034512	1034512	49.6	49.6%_768r	chr4	1034512	ATPsyn-beta	EXON	386	0	1	381	768	294	1	0	0	295	381	768	0	295	chr4_1034512
chr4	1034566	1034566	6	6.0%_83r	chr4	1034566	ATPsyn-beta	EXON	78	0	0	5	83	20	0	0	0	20	5	83	0	20	chr4_1034566
chr4	1034646	1034646	10	10.0%_80r	chr4	1034646	ATPsyn-beta	EXON	72	0	0	8	80	24	0	0	0	24	8	80	0	24	chr4_1034646
chr4	1034723	1034723	6.1	6.1%_66r	chr4	1034723	ATPsyn-beta	EXON	62	0	0	4	66	13	0	0	0	13	4	66	0	13	chr4_1034723
chr4	69674	69674	7.7	7.7%_26r	chr4	69674	pan	EXON	24	0	0	2	26	13	0	0	0	13	2	26	0	13	chr4_69674
chr4	69742	69742	19.5	19.5%_41r	chr4	69742	pan	EXON	33	0	0	8	41	21	0	0	0	21	8	41	0	21	chr4_69742
chr4	69743	69743	7.3	7.3%_41r	chr4	69743	pan	EXON	38	0	0	3	41	23	0	0	0	23	3	41	0	23	chr4_69743
chr4	69927	69927	7.7	7.7%_26r	chr4	69927	pan	EXON	24	0	0	2	26	15	0	0	0	15	2	26	0	15	chr4_69927
chr4	69971	69971	18.3	18.3%_60r	chr4	69971	pan	EXON	49	0	0	11	60	47	0	0	0	47	11	60	0	47	chr4_69971
chr4	69972	69972	14.5	14.5%_62r	chr4	69972	pan	EXON	52	1	0	9	62	46	0	0	0	46	9	62	0	46	chr4_69972
chr4	72349	72349	11.9	11.9%_109r	chr4	72349	pan	EXON	96	0	0	13	109	59	0	0	0	59	13	109	0	59	chr4_72349
chr4	72448	72448	34	34.0%_53r	chr4	72448	pan	EXON	35	0	0	18	53	53	1	0	0	54	18	53	0	54	chr4_72448
chr4	72481	72481	51.5	51.5%_68r	chr4	72481	pan	EXON	33	0	0	35	68	60	0	0	0	60	35	68	0	60	chr4_72481
chr4	72489	72489	22.2	22.2%_54r	chr4	72489	pan	EXON	42	0	0	12	54	44	0	0	0	44	12	54	0	44	chr4_72489
chr4	72494	72494	23.4	23.4%_47r	chr4	72494	pan	EXON	36	0	0	11	47	38	0	0	0	38	11	47	0	38	chr4_72494
chr4	72838	72838	16	16.0%_25r	chr4	72838	pan	EXON	20	0	1	4	25	20	0	0	0	20	4	25	0	20	chr4_72838
chr4	75128	75128	11.1	11.1%_63r	chr4	75128	pan	EXON	56	0	0	7	63	33	0	0	0	33	7	63	0	33	chr4_75128
chr4	75133	75133	16.4	16.4%_61r	chr4	75133	pan	EXON	51	0	0	10	61	34	0	0	0	34	10	61	0	34	chr4_75133
chr4	82674	82674	7.3	7.3%_41r	chr4	82674	pan	EXON	38	0	0	3	41	32	0	0	0	32	3	41	0	32	chr4_82674
chr4	82675	82675	6.5	6.5%_46r	chr4	82675	pan	EXON	43	0	0	3	46	35	0	0	0	35	3	46	0	35	chr4_82675
chr4	85717	85717	33.3	33.3%_78r	chr4	85717	pan	EXON	52	0	0	26	78	27	0	0	0	27	26	78	0	27	chr4_85717
chr4	85881	85881	6.2	6.2%_65r	chr4	85881	pan	EXON	61	0	0	4	65	32	0	1	0	33	4	65	0	33	chr4_85881
chr4	85890	85890	6.5	6.5%_62r	chr4	85890	pan	EXON	58	0	0	4	62	31	0	0	0	31	4	62	0	31	chr4_85890
chr4	87059	87059	14	14.0%_43r	chr4	87059	pan	EXON	37	0	0	6	43	36	0	0	0	36	6	43	0	36	chr4_87059
chr4	87066	87066	6.5	6.5%_62r	chr4	87066	pan	EXON	58	0	0	4	62	38	0	0	0	38	4	62	0	38	chr4_87066
chr4	87111	87111	12.5	12.5%_56r	chr4	87111	pan	EXON	49	0	0	7	56	26	0	0	0	26	7	56	0	26	chr4_87111
chr4	87117	87117	12.9	12.9%_62r	chr4	87117	pan	EXON	54	0	0	8	62	37	0	0	0	37	8	62	0	37	chr4_87117
chr4	87136	87136	8.6	8.6%_58r	chr4	87136	pan	EXON	53	0	0	5	58	32	1	0	0	33	5	58	0	33	chr4_87136
chr4	94539	94539	7.4	7.4%_68r	chr4	94539	pan	EXON	63	0	0	5	68	26	0	0	0	26	5	68	0	26	chr4_94539
chr4	94578	94578	10.3	10.3%_29r	chr4	94578	pan	EXON	26	0	0	3	29	11	0	0	0	11	3	29	0	11	chr4_94578
chr4	94899	94899	9.1	9.1%_44r	chr4	94899	pan	EXON	40	0	0	4	44	15	0	0	0	15	4	44	0	15	chr4_94899
chr4	94935	94935	8	8.0%_50r	chr4	94935	pan	EXON	46	0	0	4	50	19	0	0	0	19	4	50	0	19	chr4_94935
chr4	107646	107646	10.7	10.7%_28r	chr4	107646	pan	EXON	25	0	0	3	28	10	0	0	0	10	3	28	0	10	chr4_107646
chr4	107827	107827	10	10.0%_20r	chr4	107827	pan	EXON	18	0	0	2	20	10	0	0	0	10	2	20	0	10	chr4_107827
chr4	108219	108219	25	25.0%_20r	chr4	108219	pan	EXON	15	0	0	5	20	13	0	0	0	13	5	20	0	13	chr4_108219
chr4	108255	108255	10	10.0%_20r	chr4	108255	pan	EXON	18	0	0	2	20	12	0	0	0	12	2	20	0	12	chr4_108255
chr4	1124294	1124294	12.6	12.6%_1035r	chr4	1124294	Arf102F	EXON	902	1	2	130	1035	363	0	0	1	364	130	1035	1	364	chr4_1124294
chr4	1124328	1124328	6.9	6.9%_742r	chr4	1124328	Arf102F	EXON	691	0	0	51	742	268	0	0	0	268	51	742	0	268	chr4_1124328
chr4	1124515	1124515	25.1	25.1%_1272r	chr4	1124515	Arf102F	EXON	953	0	0	319	1272	467	0	0	0	467	319	1272	0	467	chr4_1124515
chr4	1124641	1124641	25.7	25.7%_1242r	chr4	1124641	Arf102F	EXON	914	5	4	319	1242	490	0	0	0	490	319	1242	0	490	chr4_1124641
chr4	1124820	1124820	6.2	6.2%_813r	chr4	1124820	Arf102F	EXON	761	1	1	50	813	298	1	0	0	299	50	813	0	299	chr4_1124820
chr4	1124997	1124997	9.8	9.8%_906r	chr4	1124997	Arf102F	EXON	815	2	0	89	906	305	0	0	0	305	89	906	0	305	chr4_1124997
chr4	1125090	1125090	14.3	14.3%_614r	chr4	1125090	Arf102F	EXON	525	0	1	88	614	168	0	0	0	168	88	614	0	168	chr4_1125090
chr4	1125282	1125282	8.5	8.5%_142r	chr4	1125282	Arf102F	EXON	129	0	1	12	142	17	0	0	0	17	12	142	0	17	chr4_1125282
chr4	1225895	1225895	20	20.0%_20r	chr4	1225895	Dyrk3	EXON	0	16	4	0	20	0	10	0	0	10	4	20	0	10	chr4_1225895
chr4	1226295	1226295	11.8	11.8%_51r	chr4	1226295	Dyrk3	EXON	0	45	6	0	51	0	22	0	0	22	6	51	0	22	chr4_1226295
chr4	1226401	1226401	12.9	12.9%_31r	chr4	1226401	Dyrk3	EXON	0	27	4	0	31	0	20	0	0	20	4	31	0	20	chr4_1226401
chr4	1226574	1226574	11.1	11.1%_36r	chr4	1226574	Dyrk3	EXON	0	32	4	0	36	0	13	0	0	13	4	36	0	13	chr4_1226574
chr4	1226611	1226611	7.7	7.7%_26r	chr4	1226611	Dyrk3	EXON	0	24	2	0	26	0	25	0	0	25	2	26	0	25	chr4_1226611
chr4	1226661	1226661	17.1	17.1%_41r	chr4	1226661	Dyrk3	EXON	0	34	7	0	41	0	26	0	0	26	7	41	0	26	chr4_1226661
chr4	1226701	1226701	6.7	6.7%_30r	chr4	1226701	Dyrk3	EXON	0	28	2	0	30	0	17	0	0	17	2	30	0	17	chr4_1226701
chr4	1226721	1226721	7.7	7.7%_26r	chr4	1226721	Dyrk3	EXON	0	24	2	0	26	0	22	0	0	22	2	26	0	22	chr4_1226721
chr4	1226796	1226796	15.2	15.2%_46r	chr4	1226796	Dyrk3	EXON	0	39	7	0	46	0	39	0	0	39	7	46	0	39	chr4_1226796
chr4	1227083	1227083	9.4	9.4%_32r	chr4	1227083	Dyrk3	EXON	0	29	3	0	32	0	20	0	0	20	3	32	0	20	chr4_1227083
chr4	1227113	1227113	6.2	6.2%_32r	chr4	1227113	Dyrk3	EXON	0	30	2	0	32	0	24	0	0	24	2	32	0	24	chr4_1227113
chr4	1227220	1227220	6.8	6.8%_59r	chr4	1227220	Dyrk3	EXON	0	55	4	0	59	0	26	0	0	26	4	59	0	26	chr4_1227220
chr4	1227253	1227253	14.7	14.7%_34r	chr4	1227253	Dyrk3	EXON	0	29	5	0	34	0	16	0	0	16	5	34	0	16	chr4_1227253
chr4	1227281	1227281	8.1	8.1%_37r	chr4	1227281	Dyrk3	EXON	0	34	3	0	37	0	20	0	0	20	3	37	0	20	chr4_1227281
chr4	1227344	1227344	13.9	13.9%_36r	chr4	1227344	Dyrk3	EXON	0	31	5	0	36	0	19	0	0	19	5	36	0	19	chr4_1227344
chr4	1227465	1227465	10.2	10.2%_49r	chr4	1227465	Dyrk3	EXON	0	44	5	0	49	0	23	0	0	23	5	49	0	23	chr4_1227465
chr4	1228749	1228749	34.5	34.5%_58r	chr4	1228749	Dyrk3	EXON	0	38	20	0	58	0	20	0	0	20	20	58	0	20	chr4_1228749
chr4	1228879	1228879	64.8	64.8%_71r	chr4	1228879	Dyrk3	EXON	0	25	46	0	71	0	28	0	0	28	46	71	0	28	chr4_1228879
chr4	1228929	1228929	22	22.0%_50r	chr4	1228929	Dyrk3	EXON	0	39	11	0	50	0	32	0	0	32	11	50	0	32	chr4_1228929
chr4	1228933	1228933	6.7	6.7%_45r	chr4	1228933	Dyrk3	EXON	0	42	3	0	45	0	25	0	0	25	3	45	0	25	chr4_1228933
chr4	1229094	1229094	8.9	8.9%_45r	chr4	1229094	Dyrk3	EXON	0	41	4	0	45	0	17	0	0	17	4	45	0	17	chr4_1229094
chr4	1229140	1229140	6.8	6.8%_44r	chr4	1229140	Dyrk3	EXON	0	41	3	0	44	0	24	0	0	24	3	44	0	24	chr4_1229140
chr4	1229150	1229150	9.3	9.3%_43r	chr4	1229150	Dyrk3	EXON	0	39	4	0	43	0	20	0	0	20	4	43	0	20	chr4_1229150
chr4	1229286	1229286	17	17.0%_47r	chr4	1229286	Dyrk3	EXON	0	39	8	0	47	0	23	0	0	23	8	47	0	23	chr4_1229286
chr4	1229323	1229323	11.4	11.4%_44r	chr4	1229323	Dyrk3	EXON	0	39	5	0	44	0	13	0	0	13	5	44	0	13	chr4_1229323
chr4	1229355	1229355	14.6	14.6%_48r	chr4	1229355	Dyrk3	EXON	0	41	7	0	48	0	17	0	0	17	7	48	0	17	chr4_1229355
chr4	1229365	1229365	7.7	7.7%_39r	chr4	1229365	Dyrk3	EXON	0	36	3	0	39	0	12	0	0	12	3	39	0	12	chr4_1229365
chr4	1229388	1229388	46.9	46.9%_32r	chr4	1229388	Dyrk3	EXON	0	17	15	0	32	0	14	0	0	14	15	32	0	14	chr4_1229388
chr4	1229389	1229389	6.2	6.2%_32r	chr4	1229389	Dyrk3	EXON	0	30	2	0	32	0	14	0	0	14	2	32	0	14	chr4_1229389
chr4	1229475	1229475	6.5	6.5%_46r	chr4	1229475	Dyrk3	EXON	1	42	3	0	46	0	15	0	0	15	3	46	0	15	chr4_1229475
chr4	1229477	1229477	13	13.0%_46r	chr4	1229477	Dyrk3	EXON	0	40	6	0	46	0	17	0	0	17	6	46	0	17	chr4_1229477
chr4	1229659	1229659	25	25.0%_36r	chr4	1229659	Dyrk3	EXON	0	27	9	0	36	0	23	0	0	23	9	36	0	23	chr4_1229659
chr4	1229731	1229731	7.8	7.8%_51r	chr4	1229731	Dyrk3	EXON	0	47	4	0	51	0	26	0	0	26	4	51	0	26	chr4_1229731
chr4	1229742	1229742	12.2	12.2%_49r	chr4	1229742	Dyrk3	EXON	0	43	6	0	49	0	19	0	0	19	6	49	0	19	chr4_1229742
chr4	1229822	1229822	9.8	9.8%_41r	chr4	1229822	Dyrk3	EXON	0	37	4	0	41	0	17	0	0	17	4	41	0	17	chr4_1229822
chr4	1229910	1229910	13.9	13.9%_36r	chr4	1229910	Dyrk3	EXON	0	31	5	0	36	0	13	0	0	13	5	36	0	13	chr4_1229910
chr4	1229916	1229916	9.1	9.1%_33r	chr4	1229916	Dyrk3	EXON	0	30	3	0	33	0	11	0	0	11	3	33	0	11	chr4_1229916
chr4	1229925	1229925	6.7	6.7%_30r	chr4	1229925	Dyrk3	EXON	0	27	2	1	30	0	10	0	0	10	2	30	0	10	chr4_1229925
chr4	1229959	1229959	20	20.0%_30r	chr4	1229959	Dyrk3	EXON	0	24	6	0	30	0	11	0	0	11	6	30	0	11	chr4_1229959
chr4	1230370	1230370	50	50.0%_30r	chr4	1230370	Dyrk3	EXON	0	15	15	0	30	0	13	0	0	13	15	30	0	13	chr4_1230370
chr4	1230449	1230449	7.7	7.7%_26r	chr4	1230449	Dyrk3	EXON	0	24	2	0	26	0	17	0	0	17	2	26	0	17	chr4_1230449
chr4	1230491	1230491	10.9	10.9%_46r	chr4	1230491	Dyrk3	EXON	0	41	5	0	46	0	15	0	0	15	5	46	0	15	chr4_1230491
chr4	1230586	1230586	23.3	23.3%_60r	chr4	1230586	Dyrk3	EXON	0	46	14	0	60	0	23	0	0	23	14	60	0	23	chr4_1230586
chr4	1230646	1230646	10	10.0%_20r	chr4	1230646	Dyrk3	EXON	0	18	2	0	20	0	12	0	0	12	2	20	0	12	chr4_1230646
chr4	1230651	1230651	13	13.0%_23r	chr4	1230651	Dyrk3	EXON	0	20	3	0	23	0	11	0	0	11	3	23	0	11	chr4_1230651
chr4	436985	436985	34.6	34.6%_26r	chr4	436985	lgs	EXON	0	17	9	0	26	0	10	0	0	10	9	26	0	10	chr4_436985
chr4	437111	437111	14.9	14.9%_134r	chr4	437111	lgs	EXON	0	114	20	0	134	0	42	0	0	42	20	134	0	42	chr4_437111
chr4	437204	437204	25.6	25.6%_86r	chr4	437204	lgs	EXON	1	63	22	0	86	0	33	0	0	33	22	86	0	33	chr4_437204
chr4	437207	437207	9.8	9.8%_92r	chr4	437207	lgs	EXON	0	83	9	0	92	0	36	0	0	36	9	92	0	36	chr4_437207
chr4	437247	437247	21.6	21.6%_74r	chr4	437247	lgs	EXON	0	58	16	0	74	0	28	0	0	28	16	74	0	28	chr4_437247
chr4	437248	437248	11	11.0%_73r	chr4	437248	lgs	EXON	0	65	8	0	73	0	27	0	0	27	8	73	0	27	chr4_437248
chr4	437263	437263	29	29.0%_69r	chr4	437263	lgs	EXON	0	49	20	0	69	0	30	0	0	30	20	69	0	30	chr4_437263
chr4	437264	437264	22.1	22.1%_68r	chr4	437264	lgs	EXON	0	53	15	0	68	0	30	0	0	30	15	68	0	30	chr4_437264
chr4	437265	437265	10.4	10.4%_67r	chr4	437265	lgs	EXON	0	60	7	0	67	0	30	0	0	30	7	67	0	30	chr4_437265
chr4	437302	437302	6.8	6.8%_74r	chr4	437302	lgs	EXON	0	69	5	0	74	0	32	0	0	32	5	74	0	32	chr4_437302
chr4	437313	437313	23.6	23.6%_89r	chr4	437313	lgs	EXON	0	68	21	0	89	0	40	0	0	40	21	89	0	40	chr4_437313
chr4	437314	437314	18.2	18.2%_88r	chr4	437314	lgs	EXON	0	72	16	0	88	0	43	0	0	43	16	88	0	43	chr4_437314
chr4	437316	437316	7.3	7.3%_96r	chr4	437316	lgs	EXON	0	89	7	0	96	0	44	0	0	44	7	96	0	44	chr4_437316
chr4	437386	437386	25	25.0%_60r	chr4	437386	lgs	EXON	0	45	15	0	60	0	34	0	0	34	15	60	0	34	chr4_437386
chr4	437387	437387	9.5	9.5%_63r	chr4	437387	lgs	EXON	0	57	6	0	63	0	36	0	0	36	6	63	0	36	chr4_437387
chr4	437444	437444	11.1	11.1%_108r	chr4	437444	lgs	EXON	0	96	12	0	108	0	51	0	0	51	12	108	0	51	chr4_437444
chr4	437592	437592	14.9	14.9%_87r	chr4	437592	lgs	EXON	0	74	13	0	87	0	45	0	0	45	13	87	0	45	chr4_437592
chr4	437620	437620	15.4	15.4%_104r	chr4	437620	lgs	EXON	0	88	16	0	104	0	53	0	0	53	16	104	0	53	chr4_437620
chr4	437873	437873	7.1	7.1%_28r	chr4	437873	lgs	EXON	0	26	2	0	28	0	15	0	0	15	2	28	0	15	chr4_437873
chr4	438053	438053	47.6	47.6%_21r	chr4	438053	lgs	EXON	0	11	10	0	21	0	23	0	0	23	10	21	0	23	chr4_438053
chr4	438067	438067	9.1	9.1%_22r	chr4	438067	lgs	EXON	0	20	2	0	22	0	21	0	0	21	2	22	0	21	chr4_438067
chr4	438655	438655	22.7	22.7%_22r	chr4	438655	lgs	EXON	0	17	5	0	22	0	23	0	1	24	5	22	0	24	chr4_438655
chr4	440588	440588	8.3	8.3%_24r	chr4	440588	lgs	EXON	0	22	2	0	24	0	10	0	0	10	2	24	0	10	chr4_440588
chr4	440601	440601	24	24.0%_25r	chr4	440601	lgs	EXON	0	19	6	0	25	0	12	0	0	12	6	25	0	12	chr4_440601
chr4	440724	440724	14.3	14.3%_28r	chr4	440724	lgs	EXON	0	24	4	0	28	0	18	0	0	18	4	28	0	18	chr4_440724
chr4	440753	440753	10	10.0%_20r	chr4	440753	lgs	EXON	0	18	2	0	20	0	10	0	0	10	2	20	0	10	chr4_440753
chr4	440759	440759	9.5	9.5%_21r	chr4	440759	lgs	EXON	0	19	2	0	21	0	10	0	0	10	2	21	0	10	chr4_440759
chr4	440916	440916	13	13.0%_23r	chr4	440916	lgs	EXON	0	19	3	1	23	0	17	0	0	17	3	23	0	17	chr4_440916
chr4	440935	440935	8	8.0%_25r	chr4	440935	lgs	EXON	0	23	2	0	25	0	18	0	0	18	2	25	0	18	chr4_440935
chr4	442304	442304	7.4	7.4%_81r	chr4	442304	lgs	EXON	0	75	6	0	81	0	34	0	0	34	6	81	0	34	chr4_442304
chr4	442330	442330	12.5	12.5%_88r	chr4	442330	lgs	EXON	0	77	11	0	88	0	21	0	0	21	11	88	0	21	chr4_442330
chr4	442384	442384	23.4	23.4%_47r	chr4	442384	lgs	EXON	0	36	11	0	47	0	13	0	0	13	11	47	0	13	chr4_442384
chr4	442385	442385	23.9	23.9%_46r	chr4	442385	lgs	EXON	0	35	11	0	46	0	16	0	0	16	11	46	0	16	chr4_442385
chr4	442960	442960	8.1	8.1%_111r	chr4	442960	lgs	EXON	1	101	9	0	111	0	35	0	0	35	9	111	0	35	chr4_442960
chr4	442985	442985	16.7	16.7%_66r	chr4	442985	lgs	EXON	0	55	11	0	66	0	24	0	0	24	11	66	0	24	chr4_442985
chr4	442997	442997	67.3	67.3%_49r	chr4	442997	lgs	EXON	0	16	33	0	49	0	26	0	0	26	33	49	0	26	chr4_442997
chr4	443017	443017	19.4	19.4%_62r	chr4	443017	lgs	EXON	0	50	12	0	62	0	29	0	0	29	12	62	0	29	chr4_443017
chr4	443093	443093	7.8	7.8%_90r	chr4	443093	lgs	EXON	0	83	7	0	90	0	35	0	1	36	7	90	0	36	chr4_443093
chr4	443116	443116	11.1	11.1%_63r	chr4	443116	lgs	EXON	0	56	7	0	63	0	29	0	0	29	7	63	0	29	chr4_443116
chr4	443117	443117	6.3	6.3%_63r	chr4	443117	lgs	EXON	0	59	4	0	63	0	29	0	0	29	4	63	0	29	chr4_443117
chr4	443135	443135	17.4	17.4%_46r	chr4	443135	lgs	EXON	0	38	8	0	46	0	21	0	0	21	8	46	0	21	chr4_443135
chr4	443225	443225	18	18.0%_89r	chr4	443225	lgs	EXON	1	72	16	0	89	0	37	0	0	37	16	89	0	37	chr4_443225
chr4	443411	443411	8.6	8.6%_81r	chr4	443411	lgs	EXON	0	74	7	0	81	0	23	0	0	23	7	81	0	23	chr4_443411
chr4	443423	443423	14.7	14.7%_75r	chr4	443423	lgs	EXON	0	64	11	0	75	0	21	0	0	21	11	75	0	21	chr4_443423
chr4	443445	443445	7	7.0%_71r	chr4	443445	lgs	EXON	0	66	5	0	71	0	24	0	0	24	5	71	0	24	chr4_443445
chr4	443457	443457	8.7	8.7%_69r	chr4	443457	lgs	EXON	0	63	6	0	69	0	16	0	0	16	6	69	0	16	chr4_443457
chr4	443529	443529	7.9	7.9%_89r	chr4	443529	lgs	EXON	0	82	7	0	89	0	36	0	0	36	7	89	0	36	chr4_443529
chr4	443607	443607	7	7.0%_43r	chr4	443607	lgs	EXON	0	40	3	0	43	0	12	0	0	12	3	43	0	12	chr4_443607
chr4	443637	443637	6.5	6.5%_77r	chr4	443637	lgs	EXON	0	72	5	0	77	0	17	0	0	17	5	77	0	17	chr4_443637
chr4	443758	443758	8.3	8.3%_36r	chr4	443758	lgs	EXON	0	33	3	0	36	0	15	0	0	15	3	36	0	15	chr4_443758
chr4	443827	443827	6.2	6.2%_81r	chr4	443827	lgs	EXON	0	76	5	0	81	0	19	0	0	19	5	81	0	19	chr4_443827
chr4	573643	573643	22.2	22.2%_27r	chr4	573643	Ephrin	EXON	21	0	0	6	27	17	0	0	0	17	6	27	0	17	chr4_573643
chr4	573651	573651	14.3	14.3%_35r	chr4	573651	Ephrin	EXON	30	0	0	5	35	24	0	0	0	24	5	35	0	24	chr4_573651
chr4	573661	573661	7.1	7.1%_28r	chr4	573661	Ephrin	EXON	26	0	0	2	28	23	0	0	0	23	2	28	0	23	chr4_573661
chr4	573800	573800	9.1	9.1%_22r	chr4	573800	Ephrin	EXON	20	0	0	2	22	17	0	0	0	17	2	22	0	17	chr4_573800
chr4	573807	573807	12	12.0%_25r	chr4	573807	Ephrin	EXON	22	0	0	3	25	15	0	0	0	15	3	25	0	15	chr4_573807
chr4	573886	573886	13.6	13.6%_22r	chr4	573886	Ephrin	EXON	19	0	0	3	22	18	0	0	0	18	3	22	0	18	chr4_573886
chr4	573945	573945	7.1	7.1%_28r	chr4	573945	Ephrin	EXON	26	0	0	2	28	17	0	0	0	17	2	28	0	17	chr4_573945
chr4	574000	574000	7.1	7.1%_28r	chr4	574000	Ephrin	EXON	26	0	0	2	28	25	0	0	0	25	2	28	0	25	chr4_574000
chr4	574043	574043	8	8.0%_25r	chr4	574043	Ephrin	EXON	23	0	0	2	25	20	0	0	0	20	2	25	0	20	chr4_574043
chr4	574085	574085	22.7	22.7%_22r	chr4	574085	Ephrin	EXON	17	0	0	5	22	10	0	0	0	10	5	22	0	10	chr4_574085
chr4	574131	574131	8.3	8.3%_36r	chr4	574131	Ephrin	EXON	33	0	0	3	36	17	0	0	0	17	3	36	0	17	chr4_574131
chr4	574145	574145	7.9	7.9%_38r	chr4	574145	Ephrin	EXON	34	1	0	3	38	14	0	0	0	14	3	38	0	14	chr4_574145
chr4	574192	574192	50	50.0%_26r	chr4	574192	Ephrin	EXON	13	0	0	13	26	28	0	0	0	28	13	26	0	28	chr4_574192
chr4	574331	574331	21.9	21.9%_32r	chr4	574331	Ephrin	EXON	25	0	0	7	32	16	0	0	0	16	7	32	0	16	chr4_574331
chr4	574401	574401	7.4	7.4%_27r	chr4	574401	Ephrin	EXON	25	0	0	2	27	14	0	0	0	14	2	27	0	14	chr4_574401
chr4	575363	575363	6.9	6.9%_29r	chr4	575363	Ephrin	EXON	27	0	0	2	29	15	0	0	0	15	2	29	0	15	chr4_575363
chr4	575411	575411	10.5	10.5%_38r	chr4	575411	Ephrin	EXON	33	0	1	4	38	19	0	0	0	19	4	38	0	19	chr4_575411
chr4	575422	575422	6.7	6.7%_30r	chr4	575422	Ephrin	EXON	28	0	0	2	30	15	0	0	0	15	2	30	0	15	chr4_575422
chr4	575434	575434	6.7	6.7%_30r	chr4	575434	Ephrin	EXON	28	0	0	2	30	18	0	0	0	18	2	30	0	18	chr4_575434
chr4	575448	575448	12	12.0%_25r	chr4	575448	Ephrin	EXON	22	0	0	3	25	10	0	0	0	10	3	25	0	10	chr4_575448
chr4	575485	575485	23.8	23.8%_21r	chr4	575485	Ephrin	EXON	16	0	0	5	21	24	0	0	0	24	5	21	0	24	chr4_575485
chr4	575548	575548	10	10.0%_30r	chr4	575548	Ephrin	EXON	27	0	0	3	30	18	0	0	0	18	3	30	0	18	chr4_575548
chr4	575752	575752	6.7	6.7%_30r	chr4	575752	Ephrin	EXON	28	0	0	2	30	25	0	0	0	25	2	30	0	25	chr4_575752
chr4	575804	575804	6.7	6.7%_30r	chr4	575804	Ephrin	EXON	27	0	1	2	30	13	0	0	0	13	2	30	0	13	chr4_575804
chr4	575824	575824	8	8.0%_25r	chr4	575824	Ephrin	EXON	23	0	0	2	25	12	0	0	0	12	2	25	0	12	chr4_575824
chr4	575869	575869	28.6	28.6%_35r	chr4	575869	Ephrin	EXON	25	0	0	10	35	26	0	0	0	26	10	35	0	26	chr4_575869
chr4	575879	575879	12.5	12.5%_32r	chr4	575879	Ephrin	EXON	28	0	0	4	32	22	0	0	0	22	4	32	0	22	chr4_575879
chr4	575891	575891	12	12.0%_25r	chr4	575891	Ephrin	EXON	22	0	0	3	25	18	0	0	0	18	3	25	0	18	chr4_575891
chr4	575899	575899	8.7	8.7%_23r	chr4	575899	Ephrin	EXON	21	0	0	2	23	15	0	0	0	15	2	23	0	15	chr4_575899
chr4	575912	575912	7.7	7.7%_26r	chr4	575912	Ephrin	EXON	24	0	0	2	26	24	0	0	0	24	2	26	0	24	chr4_575912
chr4	575916	575916	17.4	17.4%_23r	chr4	575916	Ephrin	EXON	19	0	0	4	23	23	0	0	0	23	4	23	0	23	chr4_575916
chr4	575956	575956	39.3	39.3%_28r	chr4	575956	Ephrin	EXON	17	0	0	11	28	24	0	0	0	24	11	28	0	24	chr4_575956
chr4	575958	575958	7.1	7.1%_28r	chr4	575958	Ephrin	EXON	26	0	0	2	28	21	0	1	0	22	2	28	0	22	chr4_575958
chr4	575985	575985	13	13.0%_23r	chr4	575985	Ephrin	EXON	20	0	0	3	23	14	0	0	0	14	3	23	0	14	chr4_575985
chr4	576106	576106	12.2	12.2%_41r	chr4	576106	Ephrin	EXON	36	0	0	5	41	19	0	0	0	19	5	41	0	19	chr4_576106
chr4	576114	576114	10.5	10.5%_38r	chr4	576114	Ephrin	EXON	34	0	0	4	38	14	0	0	0	14	4	38	0	14	chr4_576114
chr4	576142	576142	9.1	9.1%_44r	chr4	576142	Ephrin	EXON	40	0	0	4	44	20	0	0	0	20	4	44	0	20	chr4_576142
chr4	576144	576144	9.3	9.3%_43r	chr4	576144	Ephrin	EXON	39	0	0	4	43	19	0	0	0	19	4	43	0	19	chr4_576144
chr4	576167	576167	8.6	8.6%_35r	chr4	576167	Ephrin	EXON	32	0	0	3	35	25	0	0	0	25	3	35	0	25	chr4_576167
chr4	576173	576173	16.7	16.7%_30r	chr4	576173	Ephrin	EXON	25	0	0	5	30	23	0	0	0	23	5	30	0	23	chr4_576173
chr4	576188	576188	6.9	6.9%_29r	chr4	576188	Ephrin	EXON	27	0	0	2	29	28	0	0	0	28	2	29	0	28	chr4_576188
chr4	576249	576249	24.1	24.1%_29r	chr4	576249	Ephrin	EXON	22	0	0	7	29	25	0	0	0	25	7	29	0	25	chr4_576249
chr4	576253	576253	6.1	6.1%_33r	chr4	576253	Ephrin	EXON	31	0	0	2	33	25	0	0	0	25	2	33	0	25	chr4_576253
chr4	576255	576255	8.6	8.6%_35r	chr4	576255	Ephrin	EXON	32	0	0	3	35	25	0	0	0	25	3	35	0	25	chr4_576255
chr4	577024	577024	11.1	11.1%_27r	chr4	577024	Ephrin	EXON	24	0	0	3	27	20	0	0	0	20	3	27	0	20	chr4_577024
chr4	577044	577044	11.3	11.3%_53r	chr4	577044	Ephrin	EXON	47	0	0	6	53	27	0	0	0	27	6	53	0	27	chr4_577044
chr4	577068	577068	17.2	17.2%_29r	chr4	577068	Ephrin	EXON	24	0	0	5	29	13	0	0	0	13	5	29	0	13	chr4_577068
chr4	577069	577069	10.3	10.3%_29r	chr4	577069	Ephrin	EXON	26	0	0	3	29	14	0	0	0	14	3	29	0	14	chr4_577069
chr4	577082	577082	9.1	9.1%_33r	chr4	577082	Ephrin	EXON	30	0	0	3	33	16	0	0	0	16	3	33	0	16	chr4_577082
chr4	577152	577152	22.2	22.2%_36r	chr4	577152	Ephrin	EXON	28	0	0	8	36	21	0	0	0	21	8	36	0	21	chr4_577152
chr4	577166	577166	7.5	7.5%_40r	chr4	577166	Ephrin	EXON	37	0	0	3	40	27	0	0	0	27	3	40	0	27	chr4_577166
chr4	577191	577191	6.9	6.9%_29r	chr4	577191	Ephrin	EXON	27	0	0	2	29	21	0	0	0	21	2	29	0	21	chr4_577191
chr4	577212	577212	7.7	7.7%_26r	chr4	577212	Ephrin	EXON	24	0	0	2	26	19	0	0	0	19	2	26	0	19	chr4_577212
chr4	577231	577231	6.7	6.7%_30r	chr4	577231	Ephrin	EXON	28	0	0	2	30	19	0	0	0	19	2	30	0	19	chr4_577231
chr4	577239	577239	15.2	15.2%_33r	chr4	577239	Ephrin	EXON	28	0	0	5	33	19	0	0	0	19	5	33	0	19	chr4_577239
chr4	577291	577291	12.5	12.5%_24r	chr4	577291	Ephrin	EXON	21	0	0	3	24	18	0	0	0	18	3	24	0	18	chr4_577291
chr4	577294	577294	6.2	6.2%_32r	chr4	577294	Ephrin	EXON	30	0	0	2	32	20	0	0	0	20	2	32	0	20	chr4_577294
chr4	577354	577354	17.4	17.4%_23r	chr4	577354	Ephrin	EXON	19	0	0	4	23	11	0	0	0	11	4	23	0	11	chr4_577354
chr4	577424	577424	10	10.0%_30r	chr4	577424	Ephrin	EXON	27	0	0	3	30	25	0	0	0	25	3	30	0	25	chr4_577424
chr4	577447	577447	7.1	7.1%_28r	chr4	577447	Ephrin	EXON	26	0	0	2	28	16	0	0	0	16	2	28	0	16	chr4_577447
chr4	577456	577456	16.7	16.7%_24r	chr4	577456	Ephrin	EXON	20	0	0	4	24	13	0	0	0	13	4	24	0	13	chr4_577456
chr4	577714	577714	10	10.0%_20r	chr4	577714	Ephrin	EXON	18	0	0	2	20	13	0	0	0	13	2	20	0	13	chr4_577714
chr4	577944	577944	6.7	6.7%_30r	chr4	577944	Ephrin	EXON	28	0	0	2	30	12	0	0	0	12	2	30	0	12	chr4_577944
chr4	577957	577957	21.9	21.9%_32r	chr4	577957	Ephrin	EXON	25	0	0	7	32	10	0	0	0	10	7	32	0	10	chr4_577957
chr4	577978	577978	25	25.0%_28r	chr4	577978	Ephrin	EXON	21	0	0	7	28	14	0	0	0	14	7	28	0	14	chr4_577978
chr4	577986	577986	8	8.0%_25r	chr4	577986	Ephrin	EXON	23	0	0	2	25	11	0	0	0	11	2	25	0	11	chr4_577986
chr4	577996	577996	16.7	16.7%_24r	chr4	577996	Ephrin	EXON	20	0	0	4	24	14	0	0	0	14	4	24	0	14	chr4_577996
chr4	577997	577997	17.4	17.4%_23r	chr4	577997	Ephrin	EXON	19	0	0	4	23	14	0	0	0	14	4	23	0	14	chr4_577997
chr4	578151	578151	12.9	12.9%_31r	chr4	578151	Ephrin	EXON	27	0	0	4	31	13	0	0	0	13	4	31	0	13	chr4_578151
chr4	578215	578215	10	10.0%_30r	chr4	578215	Ephrin	EXON	27	0	0	3	30	10	0	0	0	10	3	30	0	10	chr4_578215
chr4	578366	578366	8.7	8.7%_23r	chr4	578366	Ephrin	EXON	21	0	0	2	23	15	0	0	0	15	2	23	0	15	chr4_578366
chr4	328980	328980	7.2	7.2%_111r	chr4	328980	PMCA	EXON	0	103	8	0	111	0	39	0	0	39	8	111	0	39	chr4_328980
chr4	328996	328996	7.7	7.7%_104r	chr4	328996	PMCA	EXON	0	96	8	0	104	0	38	0	0	38	8	104	0	38	chr4_328996
chr4	329094	329094	7.5	7.5%_93r	chr4	329094	PMCA	EXON	0	86	7	0	93	0	45	0	0	45	7	93	0	45	chr4_329094
chr4	329143	329143	41.7	41.7%_84r	chr4	329143	PMCA	EXON	0	49	35	0	84	0	49	0	0	49	35	84	0	49	chr4_329143
chr4	329158	329158	19.8	19.8%_111r	chr4	329158	PMCA	EXON	0	89	22	0	111	0	65	0	0	65	22	111	0	65	chr4_329158
chr4	329298	329298	10.2	10.2%_147r	chr4	329298	PMCA	EXON	0	132	15	0	147	0	76	0	0	76	15	147	0	76	chr4_329298
chr4	329357	329357	29.1	29.1%_117r	chr4	329357	PMCA	EXON	0	83	34	0	117	0	72	0	0	72	34	117	0	72	chr4_329357
chr4	330719	330719	9.4	9.4%_32r	chr4	330719	PMCA	EXON	0	29	3	0	32	0	23	0	0	23	3	32	0	23	chr4_330719
chr4	330799	330799	9.4	9.4%_32r	chr4	330799	PMCA	EXON	0	29	3	0	32	0	21	0	0	21	3	32	0	21	chr4_330799
chr4	330852	330852	6.7	6.7%_30r	chr4	330852	PMCA	EXON	0	28	2	0	30	0	11	0	0	11	2	30	0	11	chr4_330852
chr4	330874	330874	11.5	11.5%_26r	chr4	330874	PMCA	EXON	0	23	3	0	26	0	16	0	0	16	3	26	0	16	chr4_330874
chr4	330875	330875	11.1	11.1%_27r	chr4	330875	PMCA	EXON	0	24	3	0	27	0	15	0	0	15	3	27	0	15	chr4_330875
chr4	330876	330876	14.8	14.8%_27r	chr4	330876	PMCA	EXON	0	23	4	0	27	0	15	0	0	15	4	27	0	15	chr4_330876
chr4	330926	330926	10.7	10.7%_28r	chr4	330926	PMCA	EXON	0	25	3	0	28	0	11	0	0	11	3	28	0	11	chr4_330926
chr4	331061	331061	20	20.0%_45r	chr4	331061	PMCA	EXON	0	36	9	0	45	0	29	0	0	29	9	45	0	29	chr4_331061
chr4	331067	331067	10.5	10.5%_57r	chr4	331067	PMCA	EXON	0	51	6	0	57	0	33	0	0	33	6	57	0	33	chr4_331067
chr4	331073	331073	6.5	6.5%_62r	chr4	331073	PMCA	EXON	0	58	4	0	62	0	34	0	0	34	4	62	0	34	chr4_331073
chr4	331178	331178	17	17.0%_47r	chr4	331178	PMCA	EXON	0	39	8	0	47	0	16	0	0	16	8	47	0	16	chr4_331178
chr4	331179	331179	6	6.0%_50r	chr4	331179	PMCA	EXON	0	47	3	0	50	0	17	0	0	17	3	50	0	17	chr4_331179
chr4	331229	331229	7.1	7.1%_70r	chr4	331229	PMCA	EXON	0	65	5	0	70	0	47	0	0	47	5	70	0	47	chr4_331229
chr4	331231	331231	7.9	7.9%_76r	chr4	331231	PMCA	EXON	0	70	6	0	76	0	47	0	0	47	6	76	0	47	chr4_331231
chr4	331303	331303	9.1	9.1%_77r	chr4	331303	PMCA	EXON	0	70	7	0	77	0	48	0	0	48	7	77	0	48	chr4_331303
chr4	331372	331372	23.9	23.9%_46r	chr4	331372	PMCA	EXON	0	35	11	0	46	0	11	0	0	11	11	46	0	11	chr4_331372
chr4	331447	331447	20.2	20.2%_104r	chr4	331447	PMCA	EXON	0	83	21	0	104	0	47	0	0	47	21	104	0	47	chr4_331447
chr4	331499	331499	18.5	18.5%_108r	chr4	331499	PMCA	EXON	0	88	20	0	108	0	62	0	0	62	20	108	0	62	chr4_331499
chr4	331556	331556	19.3	19.3%_135r	chr4	331556	PMCA	EXON	0	109	26	0	135	0	56	0	0	56	26	135	0	56	chr4_331556
chr4	331728	331728	7.8	7.8%_129r	chr4	331728	PMCA	EXON	0	118	10	1	129	0	64	0	0	64	10	129	0	64	chr4_331728
chr4	331824	331824	7.7	7.7%_91r	chr4	331824	PMCA	EXON	0	84	7	0	91	0	46	0	0	46	7	91	0	46	chr4_331824
chr4	343023	343023	6.7	6.7%_209r	chr4	343023	PMCA	EXON	0	195	14	0	209	0	101	0	0	101	14	209	0	101	chr4_343023
chr4	349670	349670	12.2	12.2%_123r	chr4	349670	PMCA	EXON	0	108	15	0	123	0	90	0	0	90	15	123	0	90	chr4_349670
chr4	349873	349873	15.7	15.7%_134r	chr4	349873	PMCA	EXON	0	113	21	0	134	0	82	0	0	82	21	134	0	82	chr4_349873
chr4	349970	349970	11.6	11.6%_69r	chr4	349970	PMCA	EXON	0	61	8	0	69	0	49	0	0	49	8	69	0	49	chr4_349970
chr4	351140	351140	11.3	11.3%_115r	chr4	351140	PMCA	EXON	0	102	13	0	115	0	71	0	0	71	13	115	0	71	chr4_351140
chr4	351728	351728	10.7	10.7%_112r	chr4	351728	PMCA	EXON	0	100	12	0	112	0	78	0	0	78	12	112	0	78	chr4_351728
chr4	351804	351804	6.9	6.9%_72r	chr4	351804	PMCA	EXON	0	66	5	1	72	0	49	0	0	49	5	72	0	49	chr4_351804
chr4	351978	351978	8.6	8.6%_128r	chr4	351978	PMCA	EXON	0	117	11	0	128	0	92	0	1	93	11	128	0	93	chr4_351978
chr4	351995	351995	7.7	7.7%_156r	chr4	351995	PMCA	EXON	0	144	12	0	156	0	98	0	0	98	12	156	0	98	chr4_351995
chr4	352196	352196	6.1	6.1%_131r	chr4	352196	PMCA	EXON	0	123	8	0	131	0	73	0	0	73	8	131	0	73	chr4_352196
chr4	352247	352247	8.1	8.1%_185r	chr4	352247	PMCA	EXON	0	170	15	0	185	0	103	0	0	103	15	185	0	103	chr4_352247
chr4	352517	352517	7.6	7.6%_105r	chr4	352517	PMCA	EXON	0	97	8	0	105	0	33	0	0	33	8	105	0	33	chr4_352517
chr4	354373	354373	7.7	7.7%_65r	chr4	354373	PMCA	EXON	0	60	5	0	65	0	47	0	0	47	5	65	0	47	chr4_354373
chr4	354681	354681	6.1	6.1%_147r	chr4	354681	PMCA	EXON	0	138	9	0	147	0	72	0	1	73	9	147	0	73	chr4_354681
chr4	354813	354813	7.1	7.1%_140r	chr4	354813	PMCA	EXON	1	129	10	0	140	0	66	0	0	66	10	140	0	66	chr4_354813
chr4	355341	355341	9.7	9.7%_155r	chr4	355341	PMCA	EXON	0	140	15	0	155	1	129	0	0	130	15	155	0	130	chr4_355341
chr4	355478	355478	10	10.0%_60r	chr4	355478	PMCA	EXON	0	54	6	0	60	0	29	0	0	29	6	60	0	29	chr4_355478
chr4	460655	460655	6.2	6.2%_80r	chr4	460655	CR45126	EXON	75	0	0	5	80	18	0	0	0	18	5	80	0	18	chr4_460655
chr4	460856	460856	11.4	11.4%_44r	chr4	460856	CR45126	EXON	39	0	0	5	44	11	0	0	0	11	5	44	0	11	chr4_460856
chr4	460871	460871	6.5	6.5%_46r	chr4	460871	CR45126	EXON	43	0	0	3	46	13	0	0	0	13	3	46	0	13	chr4_460871
chr4	951761	951761	8.7	8.7%_46r	chr4	951761	4E-T	EXON	0	42	4	0	46	0	19	0	0	19	4	46	0	19	chr4_951761
chr4	951857	951857	8.8	8.8%_68r	chr4	951857	4E-T	EXON	0	62	6	0	68	0	22	0	0	22	6	68	0	22	chr4_951857
chr4	951884	951884	40.8	40.8%_49r	chr4	951884	4E-T	EXON	0	29	20	0	49	0	20	0	0	20	20	49	0	20	chr4_951884
chr4	951887	951887	87.5	87.5%_40r	chr4	951887	4E-T	EXON	0	5	35	0	40	0	21	0	0	21	35	40	0	21	chr4_951887
chr4	951941	951941	21.6	21.6%_37r	chr4	951941	4E-T	EXON	0	29	8	0	37	0	15	0	0	15	8	37	0	15	chr4_951941
chr4	952036	952036	14.3	14.3%_49r	chr4	952036	4E-T	EXON	0	42	7	0	49	0	23	0	0	23	7	49	0	23	chr4_952036
chr4	952051	952051	7.5	7.5%_53r	chr4	952051	4E-T	EXON	0	49	4	0	53	0	22	0	0	22	4	53	0	22	chr4_952051
chr4	952066	952066	6.4	6.4%_47r	chr4	952066	4E-T	EXON	0	44	3	0	47	0	17	0	0	17	3	47	0	17	chr4_952066
chr4	952188	952188	40	40.0%_70r	chr4	952188	4E-T	EXON	0	42	28	0	70	0	20	0	0	20	28	70	0	20	chr4_952188
chr4	952198	952198	18.1	18.1%_83r	chr4	952198	4E-T	EXON	0	68	15	0	83	0	29	0	0	29	15	83	0	29	chr4_952198
chr4	952204	952204	6.2	6.2%_80r	chr4	952204	4E-T	EXON	0	75	5	0	80	0	26	0	0	26	5	80	0	26	chr4_952204
chr4	952381	952381	29.3	29.3%_58r	chr4	952381	4E-T	EXON	0	41	17	0	58	0	26	0	0	26	17	58	0	26	chr4_952381
chr4	953565	953565	7.1	7.1%_56r	chr4	953565	4E-T	EXON	0	52	4	0	56	0	22	0	0	22	4	56	0	22	chr4_953565
chr4	953613	953613	21.2	21.2%_52r	chr4	953613	4E-T	EXON	0	41	11	0	52	0	16	0	0	16	11	52	0	16	chr4_953613
chr4	953640	953640	19.8	19.8%_81r	chr4	953640	4E-T	EXON	0	65	16	0	81	0	36	0	0	36	16	81	0	36	chr4_953640
chr4	953835	953835	7.2	7.2%_69r	chr4	953835	4E-T	EXON	0	64	5	0	69	0	19	0	0	19	5	69	0	19	chr4_953835
chr4	953886	953886	6.7	6.7%_75r	chr4	953886	4E-T	EXON	0	70	5	0	75	0	21	0	0	21	5	75	0	21	chr4_953886
chr4	954121	954121	8.1	8.1%_74r	chr4	954121	4E-T	EXON	0	68	6	0	74	0	31	0	0	31	6	74	0	31	chr4_954121
chr4	954135	954135	11.1	11.1%_72r	chr4	954135	4E-T	EXON	0	64	8	0	72	0	29	0	0	29	8	72	0	29	chr4_954135
chr4	954186	954186	14.3	14.3%_35r	chr4	954186	4E-T	EXON	0	30	5	0	35	0	10	0	0	10	5	35	0	10	chr4_954186
chr4	954489	954489	15	15.0%_20r	chr4	954489	4E-T	EXON	0	17	3	0	20	0	14	0	0	14	3	20	0	14	chr4_954489
chr4	954490	954490	20	20.0%_20r	chr4	954490	4E-T	EXON	0	16	4	0	20	0	14	0	0	14	4	20	0	14	chr4_954490
chr4	954518	954518	6.8	6.8%_44r	chr4	954518	4E-T	EXON	0	41	3	0	44	0	10	0	0	10	3	44	0	10	chr4_954518
chr4	954521	954521	19.1	19.1%_47r	chr4	954521	4E-T	EXON	0	38	9	0	47	0	11	0	0	11	9	47	0	11	chr4_954521
chr4	954697	954697	24.4	24.4%_41r	chr4	954697	4E-T	EXON	0	31	10	0	41	0	14	0	0	14	10	41	0	14	chr4_954697
chr4	954698	954698	7	7.0%_43r	chr4	954698	4E-T	EXON	0	40	3	0	43	0	15	0	0	15	3	43	0	15	chr4_954698
chr4	954744	954744	13	13.0%_69r	chr4	954744	4E-T	EXON	0	60	9	0	69	0	25	0	0	25	9	69	0	25	chr4_954744
chr4	954799	954799	6.3	6.3%_79r	chr4	954799	4E-T	EXON	0	74	5	0	79	0	22	0	0	22	5	79	0	22	chr4_954799
chr4	954802	954802	30.7	30.7%_75r	chr4	954802	4E-T	EXON	0	52	23	0	75	0	22	0	0	22	23	75	0	22	chr4_954802
chr4	954855	954855	8.2	8.2%_49r	chr4	954855	4E-T	EXON	0	45	4	0	49	0	18	0	0	18	4	49	0	18	chr4_954855
chr4	954962	954962	7.7	7.7%_39r	chr4	954962	4E-T	EXON	0	36	3	0	39	0	11	0	0	11	3	39	0	11	chr4_954962
chr4	955018	955018	9.1	9.1%_33r	chr4	955018	4E-T	EXON	0	29	3	1	33	0	14	0	0	14	3	33	0	14	chr4_955018
chr4	956982	956982	6.5	6.5%_46r	chr4	956982	4E-T	EXON	0	43	3	0	46	0	12	0	0	12	3	46	0	12	chr4_956982
chr4	957150	957150	6.8	6.8%_59r	chr4	957150	4E-T	EXON	0	55	4	0	59	0	31	0	0	31	4	59	0	31	chr4_957150
chr4	957213	957213	9.8	9.8%_41r	chr4	957213	4E-T	EXON	0	37	4	0	41	0	18	0	0	18	4	41	0	18	chr4_957213
chr4	957384	957384	22.4	22.4%_49r	chr4	957384	4E-T	EXON	0	38	11	0	49	0	15	0	0	15	11	49	0	15	chr4_957384
chr4	957569	957569	14.6	14.6%_89r	chr4	957569	4E-T	EXON	0	76	13	0	89	1	36	0	0	37	13	89	0	37	chr4_957569
chr4	957647	957647	12.5	12.5%_40r	chr4	957647	4E-T	EXON	0	35	5	0	40	0	14	0	0	14	5	40	0	14	chr4_957647
chr4	957681	957681	6.8	6.8%_44r	chr4	957681	4E-T	EXON	0	41	3	0	44	0	22	0	0	22	3	44	0	22	chr4_957681
chr4	957709	957709	10	10.0%_40r	chr4	957709	4E-T	EXON	0	36	4	0	40	0	20	0	0	20	4	40	0	20	chr4_957709
chr4	957772	957772	25.8	25.8%_31r	chr4	957772	4E-T	EXON	0	23	8	0	31	0	14	0	0	14	8	31	0	14	chr4_957772
chr4	472327	472327	55	55.0%_20r	chr4	472327	Asator	EXON	0	9	11	0	20	0	13	0	0	13	11	20	0	13	chr4_472327
chr4	473160	473160	8.3	8.3%_24r	chr4	473160	Asator	EXON	0	22	2	0	24	0	12	0	0	12	2	24	0	12	chr4_473160
chr4	473181	473181	7.4	7.4%_27r	chr4	473181	Asator	EXON	0	25	2	0	27	0	17	0	0	17	2	27	0	17	chr4_473181
chr4	480378	480378	7.5	7.5%_40r	chr4	480378	Asator	EXON	0	37	3	0	40	0	19	0	0	19	3	40	0	19	chr4_480378
chr4	480386	480386	10.8	10.8%_37r	chr4	480386	Asator	EXON	0	33	4	0	37	0	28	0	0	28	4	37	0	28	chr4_480386
chr4	480885	480885	10	10.0%_30r	chr4	480885	Asator	EXON	0	27	3	0	30	0	19	0	0	19	3	30	0	19	chr4_480885
chr4	485416	485416	42.9	42.9%_35r	chr4	485416	Asator	EXON	0	20	15	0	35	0	23	0	0	23	15	35	0	23	chr4_485416
chr4	485424	485424	9.4	9.4%_32r	chr4	485424	Asator	EXON	0	29	3	0	32	0	21	0	0	21	3	32	0	21	chr4_485424
chr4	210584	210584	22.7	22.7%_203r	chr4	210584	Crk	EXON	157	0	0	46	203	92	0	0	0	92	46	203	0	92	chr4_210584
chr4	210657	210657	11.1	11.1%_279r	chr4	210657	Crk	EXON	248	0	0	31	279	113	1	0	0	114	31	279	0	114	chr4_210657
chr4	210814	210814	12.5	12.5%_24r	chr4	210814	Crk	INTRON	21	0	0	3	24	10	0	0	0	10	3	24	0	10	chr4_210814
chr4	210831	210831	9.3	9.3%_43r	chr4	210831	Crk	INTRON	38	1	0	4	43	17	0	0	0	17	4	43	0	17	chr4_210831
chr4	210841	210841	7.7	7.7%_26r	chr4	210841	Crk	INTRON	24	0	0	2	26	15	0	0	0	15	2	26	0	15	chr4_210841
chr4	211764	211764	16.8	16.8%_191r	chr4	211764	Crk	EXON	159	0	0	32	191	70	0	0	0	70	32	191	0	70	chr4_211764
chr4	211775	211775	28	28.0%_150r	chr4	211775	Crk	EXON	108	0	0	42	150	65	0	0	0	65	42	150	0	65	chr4_211775
chr4	212655	212655	7.7	7.7%_310r	chr4	212655	Crk	EXON	285	1	0	24	310	103	0	0	0	103	24	310	0	103	chr4_212655
chr4	212669	212669	6.7	6.7%_225r	chr4	212669	Crk	EXON	210	0	0	15	225	71	1	0	0	72	15	225	0	72	chr4_212669
chr4	212827	212827	6.5	6.5%_279r	chr4	212827	Crk	EXON	261	0	0	18	279	100	1	0	0	101	18	279	0	101	chr4_212827
chr4	212906	212906	7.7	7.7%_208r	chr4	212906	Crk	EXON	191	0	1	16	208	67	0	0	0	67	16	208	0	67	chr4_212906
chr4	213015	213015	22.6	22.6%_164r	chr4	213015	Crk	EXON	126	1	0	37	164	59	0	0	0	59	37	164	0	59	chr4_213015
chr4	213031	213031	7.1	7.1%_127r	chr4	213031	Crk	EXON	117	0	1	9	127	48	0	0	0	48	9	127	0	48	chr4_213031
chr4	213156	213156	6.9	6.9%_72r	chr4	213156	Crk	EXON	67	0	0	5	72	18	0	0	0	18	5	72	0	18	chr4_213156
chr4	310969	310969	6.7	6.7%_30r	chr4	310969	Zip102B	EXON	0	28	2	0	30	0	10	0	0	10	2	30	0	10	chr4_310969
chr4	310978	310978	8.6	8.6%_35r	chr4	310978	Zip102B	EXON	0	32	3	0	35	0	13	0	0	13	3	35	0	13	chr4_310978
chr4	310979	310979	11.4	11.4%_35r	chr4	310979	Zip102B	EXON	0	31	4	0	35	0	14	0	0	14	4	35	0	14	chr4_310979
chr4	311004	311004	20	20.0%_45r	chr4	311004	Zip102B	EXON	0	36	9	0	45	0	16	0	0	16	9	45	0	16	chr4_311004
chr4	311023	311023	12.8	12.8%_39r	chr4	311023	Zip102B	EXON	0	34	5	0	39	0	17	0	0	17	5	39	0	17	chr4_311023
chr4	311046	311046	13	13.0%_23r	chr4	311046	Zip102B	EXON	0	20	3	0	23	0	10	0	0	10	3	23	0	10	chr4_311046
chr4	311144	311144	13	13.0%_46r	chr4	311144	Zip102B	EXON	0	40	6	0	46	0	24	0	0	24	6	46	0	24	chr4_311144
chr4	311175	311175	7.1	7.1%_99r	chr4	311175	Zip102B	EXON	1	91	7	0	99	0	49	0	0	49	7	99	0	49	chr4_311175
chr4	311177	311177	6	6.0%_100r	chr4	311177	Zip102B	EXON	0	94	6	0	100	0	50	0	0	50	6	100	0	50	chr4_311177
chr4	311186	311186	13.9	13.9%_79r	chr4	311186	Zip102B	EXON	0	68	11	0	79	0	43	0	0	43	11	79	0	43	chr4_311186
chr4	311200	311200	8.5	8.5%_71r	chr4	311200	Zip102B	EXON	0	65	6	0	71	0	34	0	0	34	6	71	0	34	chr4_311200
chr4	311205	311205	15.9	15.9%_69r	chr4	311205	Zip102B	EXON	0	58	11	0	69	0	31	0	0	31	11	69	0	31	chr4_311205
chr4	311247	311247	28.1	28.1%_32r	chr4	311247	Zip102B	EXON	1	22	9	0	32	0	17	0	0	17	9	32	0	17	chr4_311247
chr4	311248	311248	9.1	9.1%_33r	chr4	311248	Zip102B	EXON	0	30	3	0	33	0	17	0	0	17	3	33	0	17	chr4_311248
chr4	311291	311291	8	8.0%_50r	chr4	311291	Zip102B	EXON	0	46	4	0	50	0	25	0	0	25	4	50	0	25	chr4_311291
chr4	311294	311294	36.4	36.4%_44r	chr4	311294	Zip102B	EXON	0	28	16	0	44	0	23	0	0	23	16	44	0	23	chr4_311294
chr4	311295	311295	11.1	11.1%_45r	chr4	311295	Zip102B	EXON	0	40	5	0	45	0	23	0	0	23	5	45	0	23	chr4_311295
chr4	311347	311347	7.7	7.7%_65r	chr4	311347	Zip102B	EXON	0	60	5	0	65	0	19	0	0	19	5	65	0	19	chr4_311347
chr4	311371	311371	9.8	9.8%_61r	chr4	311371	Zip102B	EXON	0	55	6	0	61	0	31	0	0	31	6	61	0	31	chr4_311371
chr4	311382	311382	17.9	17.9%_67r	chr4	311382	Zip102B	EXON	0	55	12	0	67	0	26	0	0	26	12	67	0	26	chr4_311382
chr4	311405	311405	43.1	43.1%_58r	chr4	311405	Zip102B	EXON	0	33	25	0	58	0	30	0	0	30	25	58	0	30	chr4_311405
chr4	311436	311436	13.2	13.2%_53r	chr4	311436	Zip102B	EXON	0	46	7	0	53	0	30	0	0	30	7	53	0	30	chr4_311436
chr4	311447	311447	11.3	11.3%_53r	chr4	311447	Zip102B	EXON	0	47	6	0	53	0	33	0	0	33	6	53	0	33	chr4_311447
chr4	311458	311458	8.3	8.3%_60r	chr4	311458	Zip102B	EXON	0	55	5	0	60	0	33	0	0	33	5	60	0	33	chr4_311458
chr4	311459	311459	19.7	19.7%_61r	chr4	311459	Zip102B	EXON	0	49	12	0	61	0	34	0	0	34	12	61	0	34	chr4_311459
chr4	311495	311495	51.8	51.8%_83r	chr4	311495	Zip102B	EXON	0	40	43	0	83	0	36	0	0	36	43	83	0	36	chr4_311495
chr4	311518	311518	9.4	9.4%_53r	chr4	311518	Zip102B	EXON	0	48	5	0	53	0	32	0	0	32	5	53	0	32	chr4_311518
chr4	311520	311520	31.5	31.5%_54r	chr4	311520	Zip102B	EXON	0	37	17	0	54	0	32	0	0	32	17	54	0	32	chr4_311520
chr4	311562	311562	62.5	62.5%_32r	chr4	311562	Zip102B	EXON	0	12	20	0	32	0	24	0	0	24	20	32	0	24	chr4_311562
chr4	311586	311586	8.3	8.3%_48r	chr4	311586	Zip102B	EXON	0	44	4	0	48	0	32	0	0	32	4	48	0	32	chr4_311586
chr4	311594	311594	6.7	6.7%_45r	chr4	311594	Zip102B	EXON	0	41	3	1	45	0	35	0	0	35	3	45	0	35	chr4_311594
chr4	311617	311617	12.9	12.9%_62r	chr4	311617	Zip102B	EXON	0	54	8	0	62	0	31	0	0	31	8	62	0	31	chr4_311617
chr4	311630	311630	12.9	12.9%_62r	chr4	311630	Zip102B	EXON	0	53	8	1	62	0	28	0	0	28	8	62	0	28	chr4_311630
chr4	311668	311668	7	7.0%_71r	chr4	311668	Zip102B	EXON	0	66	5	0	71	1	29	0	0	30	5	71	0	30	chr4_311668
chr4	311675	311675	14.6	14.6%_82r	chr4	311675	Zip102B	EXON	0	70	12	0	82	0	33	0	0	33	12	82	0	33	chr4_311675
chr4	311689	311689	9.8	9.8%_82r	chr4	311689	Zip102B	EXON	0	74	8	0	82	0	34	0	0	34	8	82	0	34	chr4_311689
chr4	311774	311774	8.8	8.8%_34r	chr4	311774	Zip102B	EXON	0	31	3	0	34	0	26	0	0	26	3	34	0	26	chr4_311774
chr4	311791	311791	7.1	7.1%_28r	chr4	311791	Zip102B	EXON	0	26	2	0	28	1	18	0	0	19	2	28	0	19	chr4_311791
chr4	311792	311792	10.7	10.7%_28r	chr4	311792	Zip102B	EXON	0	25	3	0	28	0	19	0	0	19	3	28	0	19	chr4_311792
chr4	311793	311793	7.1	7.1%_28r	chr4	311793	Zip102B	EXON	0	26	2	0	28	0	17	0	0	17	2	28	0	17	chr4_311793
chr4	311809	311809	11.1	11.1%_36r	chr4	311809	Zip102B	EXON	0	32	4	0	36	0	15	0	1	16	4	36	0	16	chr4_311809
chr4	311842	311842	10	10.0%_30r	chr4	311842	Zip102B	EXON	0	27	3	0	30	0	12	0	0	12	3	30	0	12	chr4_311842
chr4	311849	311849	14.3	14.3%_21r	chr4	311849	Zip102B	EXON	0	18	3	0	21	0	11	0	0	11	3	21	0	11	chr4_311849
chr4	311865	311865	32.1	32.1%_28r	chr4	311865	Zip102B	EXON	0	19	9	0	28	0	18	0	0	18	9	28	0	18	chr4_311865
chr4	311868	311868	25.9	25.9%_27r	chr4	311868	Zip102B	EXON	0	20	7	0	27	0	15	0	0	15	7	27	0	15	chr4_311868
chr4	311887	311887	7.7	7.7%_26r	chr4	311887	Zip102B	EXON	0	24	2	0	26	0	11	0	0	11	2	26	0	11	chr4_311887
chr4	311888	311888	22.2	22.2%_27r	chr4	311888	Zip102B	EXON	0	21	6	0	27	0	11	0	0	11	6	27	0	11	chr4_311888
chr4	311889	311889	25	25.0%_28r	chr4	311889	Zip102B	EXON	0	21	7	0	28	0	11	0	0	11	7	28	0	11	chr4_311889
chr4	311907	311907	17.6	17.6%_34r	chr4	311907	Zip102B	EXON	0	28	6	0	34	0	18	0	0	18	6	34	0	18	chr4_311907
chr4	311923	311923	8.3	8.3%_36r	chr4	311923	Zip102B	EXON	0	33	3	0	36	0	21	0	0	21	3	36	0	21	chr4_311923
chr4	311946	311946	10.5	10.5%_57r	chr4	311946	Zip102B	EXON	0	51	6	0	57	0	25	0	0	25	6	57	0	25	chr4_311946
chr4	311958	311958	47.1	47.1%_34r	chr4	311958	Zip102B	EXON	1	17	16	0	34	0	20	0	0	20	16	34	0	20	chr4_311958
chr4	311994	311994	8	8.0%_25r	chr4	311994	Zip102B	EXON	0	23	2	0	25	0	15	0	0	15	2	25	0	15	chr4_311994
chr4	311996	311996	40	40.0%_25r	chr4	311996	Zip102B	EXON	0	15	10	0	25	0	16	0	0	16	10	25	0	16	chr4_311996
chr4	311997	311997	29.6	29.6%_27r	chr4	311997	Zip102B	EXON	0	19	8	0	27	0	22	0	0	22	8	27	0	22	chr4_311997
chr4	312007	312007	11.8	11.8%_34r	chr4	312007	Zip102B	EXON	1	29	4	0	34	0	31	0	0	31	4	34	0	31	chr4_312007
chr4	312018	312018	12.5	12.5%_40r	chr4	312018	Zip102B	EXON	1	34	5	0	40	0	37	0	0	37	5	40	0	37	chr4_312018
chr4	312057	312057	20	20.0%_50r	chr4	312057	Zip102B	EXON	0	40	10	0	50	0	26	0	0	26	10	50	0	26	chr4_312057
chr4	312081	312081	6.1	6.1%_33r	chr4	312081	Zip102B	EXON	0	31	2	0	33	0	13	0	0	13	2	33	0	13	chr4_312081
chr4	312082	312082	64.7	64.7%_34r	chr4	312082	Zip102B	EXON	0	12	22	0	34	0	13	0	0	13	22	34	0	13	chr4_312082
chr4	312086	312086	33.3	33.3%_33r	chr4	312086	Zip102B	EXON	0	22	11	0	33	0	19	0	0	19	11	33	0	19	chr4_312086
chr4	312097	312097	25	25.0%_40r	chr4	312097	Zip102B	EXON	0	30	10	0	40	0	26	0	0	26	10	40	0	26	chr4_312097
chr4	312100	312100	6.8	6.8%_44r	chr4	312100	Zip102B	EXON	0	41	3	0	44	0	24	0	0	24	3	44	0	24	chr4_312100
chr4	312199	312199	11.3	11.3%_53r	chr4	312199	Zip102B	EXON	0	47	6	0	53	0	28	0	0	28	6	53	0	28	chr4_312199
chr4	312259	312259	29	29.0%_31r	chr4	312259	Zip102B	EXON	0	22	9	0	31	0	21	0	0	21	9	31	0	21	chr4_312259
chr4	312279	312279	19.2	19.2%_26r	chr4	312279	Zip102B	EXON	0	21	5	0	26	0	18	0	0	18	5	26	0	18	chr4_312279
chr4	312304	312304	13	13.0%_23r	chr4	312304	Zip102B	EXON	0	20	3	0	23	0	23	0	0	23	3	23	0	23	chr4_312304
chr4	312308	312308	20	20.0%_25r	chr4	312308	Zip102B	EXON	0	20	5	0	25	0	26	0	0	26	5	25	0	26	chr4_312308
chr4	312321	312321	13.5	13.5%_37r	chr4	312321	Zip102B	EXON	0	32	5	0	37	0	23	0	0	23	5	37	0	23	chr4_312321
chr4	312325	312325	15.8	15.8%_38r	chr4	312325	Zip102B	EXON	0	32	6	0	38	0	24	0	0	24	6	38	0	24	chr4_312325
chr4	312326	312326	7.5	7.5%_40r	chr4	312326	Zip102B	EXON	0	37	3	0	40	0	23	0	0	23	3	40	0	23	chr4_312326
chr4	312328	312328	11.4	11.4%_44r	chr4	312328	Zip102B	EXON	0	39	5	0	44	0	25	0	0	25	5	44	0	25	chr4_312328
chr4	312332	312332	8.9	8.9%_45r	chr4	312332	Zip102B	EXON	0	41	4	0	45	0	26	0	0	26	4	45	0	26	chr4_312332
chr4	312340	312340	15.1	15.1%_53r	chr4	312340	Zip102B	EXON	0	45	8	0	53	0	25	0	0	25	8	53	0	25	chr4_312340
chr4	312424	312424	13.7	13.7%_102r	chr4	312424	Zip102B	EXON	0	88	14	0	102	0	55	0	0	55	14	102	0	55	chr4_312424
chr4	312446	312446	18	18.0%_50r	chr4	312446	Zip102B	EXON	0	41	9	0	50	1	29	0	0	30	9	50	0	30	chr4_312446
chr4	312447	312447	18	18.0%_50r	chr4	312447	Zip102B	EXON	0	41	9	0	50	0	29	0	0	29	9	50	0	29	chr4_312447
chr4	312472	312472	14.3	14.3%_21r	chr4	312472	Zip102B	EXON	0	18	3	0	21	0	13	0	0	13	3	21	0	13	chr4_312472
chr4	312509	312509	8.1	8.1%_37r	chr4	312509	Zip102B	EXON	0	34	3	0	37	0	20	0	0	20	3	37	0	20	chr4_312509
chr4	312515	312515	6.8	6.8%_44r	chr4	312515	Zip102B	EXON	0	41	3	0	44	0	22	0	0	22	3	44	0	22	chr4_312515
chr4	312527	312527	6.7	6.7%_45r	chr4	312527	Zip102B	EXON	0	42	3	0	45	0	24	0	0	24	3	45	0	24	chr4_312527
chr4	312536	312536	18.4	18.4%_49r	chr4	312536	Zip102B	EXON	0	40	9	0	49	0	32	0	0	32	9	49	0	32	chr4_312536
chr4	312546	312546	7	7.0%_57r	chr4	312546	Zip102B	EXON	0	53	4	0	57	0	31	0	0	31	4	57	0	31	chr4_312546
chr4	312565	312565	12	12.0%_83r	chr4	312565	Zip102B	EXON	0	72	10	1	83	0	32	0	0	32	10	83	0	32	chr4_312565
chr4	312576	312576	18.2	18.2%_55r	chr4	312576	Zip102B	EXON	0	45	10	0	55	0	25	0	0	25	10	55	0	25	chr4_312576
chr4	312611	312611	25	25.0%_20r	chr4	312611	Zip102B	EXON	0	15	5	0	20	0	13	0	0	13	5	20	0	13	chr4_312611
chr4	312612	312612	10	10.0%_20r	chr4	312612	Zip102B	EXON	0	18	2	0	20	0	11	0	0	11	2	20	0	11	chr4_312612
chr4	312665	312665	6.8	6.8%_59r	chr4	312665	Zip102B	EXON	0	55	4	0	59	0	22	0	0	22	4	59	0	22	chr4_312665
chr4	312823	312823	6	6.0%_547r	chr4	312823	Zip102B	EXON	0	513	33	1	547	0	204	0	0	204	33	547	0	204	chr4_312823
chr4	312871	312871	8.9	8.9%_369r	chr4	312871	Zip102B	EXON	1	335	33	0	369	0	150	0	0	150	33	369	0	150	chr4_312871
chr4	312872	312872	22.5	22.5%_373r	chr4	312872	Zip102B	EXON	0	289	84	0	373	0	158	0	0	158	84	373	0	158	chr4_312872
chr4	312925	312925	7.6	7.6%_290r	chr4	312925	Zip102B	EXON	1	267	22	0	290	0	117	0	0	117	22	290	0	117	chr4_312925
chr4	312979	312979	8.5	8.5%_364r	chr4	312979	Zip102B	EXON	0	333	31	0	364	0	145	0	0	145	31	364	0	145	chr4_312979
chr4	313044	313044	21.7	21.7%_497r	chr4	313044	Zip102B	EXON	0	388	108	1	497	0	191	0	0	191	108	497	0	191	chr4_313044
chr4	313070	313070	13.9	13.9%_475r	chr4	313070	Zip102B	EXON	1	408	66	0	475	0	206	0	1	207	66	475	0	207	chr4_313070
chr4	313146	313146	8	8.0%_350r	chr4	313146	Zip102B	EXON	0	321	28	1	350	0	143	0	0	143	28	350	0	143	chr4_313146
chr4	313169	313169	8.4	8.4%_431r	chr4	313169	Zip102B	EXON	1	394	36	0	431	0	158	0	1	159	36	431	0	159	chr4_313169
chr4	313204	313204	21.9	21.9%_553r	chr4	313204	Zip102B	EXON	0	432	121	0	553	0	220	0	1	221	121	553	0	221	chr4_313204
chr4	313225	313225	20.1	20.1%_598r	chr4	313225	Zip102B	EXON	0	478	120	0	598	0	232	0	0	232	120	598	0	232	chr4_313225
chr4	313255	313255	15.2	15.2%_427r	chr4	313255	Zip102B	EXON	0	362	65	0	427	0	169	0	0	169	65	427	0	169	chr4_313255
chr4	313276	313276	30.4	30.4%_352r	chr4	313276	Zip102B	EXON	0	245	107	0	352	1	138	0	0	139	107	352	0	139	chr4_313276
chr4	313358	313358	11.3	11.3%_381r	chr4	313358	Zip102B	EXON	0	338	43	0	381	0	149	0	0	149	43	381	0	149	chr4_313358
chr4	313419	313419	8.8	8.8%_467r	chr4	313419	Zip102B	EXON	0	426	41	0	467	1	168	0	0	169	41	467	0	169	chr4_313419
chr4	313420	313420	6.8	6.8%_469r	chr4	313420	Zip102B	EXON	0	437	32	0	469	0	169	0	0	169	32	469	0	169	chr4_313420
chr4	313645	313645	8.9	8.9%_56r	chr4	313645	Zip102B	INTRON	0	51	5	0	56	0	12	0	0	12	5	56	0	12	chr4_313645
chr4	313673	313673	13.3	13.3%_75r	chr4	313673	Zip102B	INTRON	0	65	10	0	75	0	15	0	0	15	10	75	0	15	chr4_313673
chr4	313681	313681	6.8	6.8%_74r	chr4	313681	Zip102B	INTRON	0	69	5	0	74	0	18	0	0	18	5	74	0	18	chr4_313681
chr4	313733	313733	12.9	12.9%_116r	chr4	313733	Zip102B	EXON	0	101	15	0	116	0	39	0	0	39	15	116	0	39	chr4_313733
chr4	1199118	1199118	6.5	6.5%_31r	chr4	1199118	Mitf	EXON	29	0	0	2	31	12	0	0	0	12	2	31	0	12	chr4_1199118
chr4	1199120	1199120	6.5	6.5%_31r	chr4	1199120	Mitf	EXON	29	0	0	2	31	14	0	0	0	14	2	31	0	14	chr4_1199120
chr4	1219793	1219793	7.1	7.1%_28r	chr4	1219793	Mitf	EXON	26	0	0	2	28	25	0	0	0	25	2	28	0	25	chr4_1219793
chr4	1219803	1219803	8	8.0%_25r	chr4	1219803	Mitf	EXON	23	0	0	2	25	22	0	0	0	22	2	25	0	22	chr4_1219803
chr4	1219946	1219946	13	13.0%_23r	chr4	1219946	Mitf	EXON	20	0	0	3	23	10	0	0	0	10	3	23	0	10	chr4_1219946
chr4	1219958	1219958	8.3	8.3%_24r	chr4	1219958	Mitf	EXON	22	0	0	2	24	10	0	0	0	10	2	24	0	10	chr4_1219958
chr4	1221517	1221517	8.1	8.1%_37r	chr4	1221517	Mitf	EXON	34	0	0	3	37	25	0	0	0	25	3	37	0	25	chr4_1221517
chr4	1221716	1221716	6.2	6.2%_32r	chr4	1221716	Mitf	EXON	30	0	0	2	32	10	0	0	0	10	2	32	0	10	chr4_1221716
chr4	1221776	1221776	9.5	9.5%_21r	chr4	1221776	Mitf	EXON	19	0	0	2	21	12	0	0	0	12	2	21	0	12	chr4_1221776
chr4	1222096	1222096	10.3	10.3%_29r	chr4	1222096	Mitf	EXON	26	0	0	3	29	15	0	0	0	15	3	29	0	15	chr4_1222096
chr4	1222279	1222279	6.9	6.9%_29r	chr4	1222279	Mitf	EXON	27	0	0	2	29	18	0	0	0	18	2	29	0	18	chr4_1222279
chr4	1222283	1222283	6.9	6.9%_29r	chr4	1222283	Mitf	EXON	27	0	0	2	29	18	0	0	0	18	2	29	0	18	chr4_1222283
chr4	1222284	1222284	8.7	8.7%_23r	chr4	1222284	Mitf	EXON	21	0	0	2	23	13	0	0	0	13	2	23	0	13	chr4_1222284
chr4	1222295	1222295	6.9	6.9%_29r	chr4	1222295	Mitf	EXON	27	0	0	2	29	16	0	0	0	16	2	29	0	16	chr4_1222295
chr4	1222635	1222635	13	13.0%_23r	chr4	1222635	Mitf	EXON	20	0	0	3	23	12	0	0	0	12	3	23	0	12	chr4_1222635
chr4	1222643	1222643	8.7	8.7%_23r	chr4	1222643	Mitf	EXON	20	0	1	2	23	14	0	0	0	14	2	23	0	14	chr4_1222643
chr4	1222645	1222645	9.1	9.1%_22r	chr4	1222645	Mitf	EXON	20	0	0	2	22	12	0	0	0	12	2	22	0	12	chr4_1222645
chr4	1222886	1222886	7.7	7.7%_26r	chr4	1222886	Mitf	EXON	23	1	0	2	26	12	0	0	0	12	2	26	0	12	chr4_1222886
chr4	1222890	1222890	9.1	9.1%_22r	chr4	1222890	Mitf	EXON	20	0	0	2	22	12	0	0	0	12	2	22	0	12	chr4_1222890
chr4	447003	447003	7.5	7.5%_80r	chr4	447003	CaMKI	EXON	73	1	0	6	80	16	0	0	0	16	6	80	0	16	chr4_447003
chr4	450245	450245	10.7	10.7%_140r	chr4	450245	CaMKI	EXON	125	0	0	15	140	27	0	0	0	27	15	140	0	27	chr4_450245
chr4	450250	450250	6.5	6.5%_139r	chr4	450250	CaMKI	EXON	130	0	0	9	139	26	0	0	0	26	9	139	0	26	chr4_450250
chr4	450288	450288	23.2	23.2%_155r	chr4	450288	CaMKI	EXON	119	0	0	36	155	25	1	0	0	26	36	155	0	26	chr4_450288
chr4	450289	450289	6.5	6.5%_169r	chr4	450289	CaMKI	EXON	157	1	0	11	169	27	0	0	0	27	11	169	0	27	chr4_450289
chr4	450383	450383	6.2	6.2%_130r	chr4	450383	CaMKI	EXON	122	0	0	8	130	20	0	0	0	20	8	130	0	20	chr4_450383
chr4	450385	450385	26.4	26.4%_121r	chr4	450385	CaMKI	EXON	89	0	0	32	121	19	0	0	0	19	32	121	0	19	chr4_450385
chr4	450461	450461	6.3	6.3%_159r	chr4	450461	CaMKI	EXON	149	0	0	10	159	28	0	0	0	28	10	159	0	28	chr4_450461
chr4	451277	451277	13.9	13.9%_108r	chr4	451277	CaMKI	EXON	93	0	0	15	108	19	0	0	0	19	15	108	0	19	chr4_451277
chr4	451346	451346	7.8	7.8%_115r	chr4	451346	CaMKI	EXON	106	0	0	9	115	25	0	0	0	25	9	115	0	25	chr4_451346
chr4	451347	451347	36.2	36.2%_116r	chr4	451347	CaMKI	EXON	74	0	0	42	116	30	0	0	0	30	42	116	0	30	chr4_451347
chr4	451348	451348	14.6	14.6%_123r	chr4	451348	CaMKI	EXON	104	0	1	18	123	31	0	0	0	31	18	123	0	31	chr4_451348
chr4	451430	451430	9.3	9.3%_97r	chr4	451430	CaMKI	EXON	88	0	0	9	97	15	0	0	0	15	9	97	0	15	chr4_451430
chr4	452982	452982	6.9	6.9%_72r	chr4	452982	CaMKI	EXON	67	0	0	5	72	18	0	0	0	18	5	72	0	18	chr4_452982
chr4	452990	452990	15.2	15.2%_79r	chr4	452990	CaMKI	EXON	67	0	0	12	79	22	0	0	0	22	12	79	0	22	chr4_452990
chr4	453077	453077	21.4	21.4%_56r	chr4	453077	CaMKI	EXON	44	0	0	12	56	17	0	0	0	17	12	56	0	17	chr4_453077
chr4	453157	453157	9.4	9.4%_64r	chr4	453157	CaMKI	EXON	57	1	0	6	64	16	0	0	0	16	6	64	0	16	chr4_453157
chr4	453176	453176	10.3	10.3%_58r	chr4	453176	CaMKI	EXON	52	0	0	6	58	15	0	0	0	15	6	58	0	15	chr4_453176
chr4	453198	453198	12.9	12.9%_70r	chr4	453198	CaMKI	EXON	61	0	0	9	70	19	0	0	0	19	9	70	0	19	chr4_453198
chr4	453201	453201	9.2	9.2%_76r	chr4	453201	CaMKI	EXON	69	0	0	7	76	19	0	0	0	19	7	76	0	19	chr4_453201
chr4	453202	453202	9.2	9.2%_76r	chr4	453202	CaMKI	EXON	68	0	1	7	76	19	0	0	0	19	7	76	0	19	chr4_453202
chr4	453215	453215	14.5	14.5%_55r	chr4	453215	CaMKI	EXON	47	0	0	8	55	17	0	0	0	17	8	55	0	17	chr4_453215
chr4	453318	453318	11.4	11.4%_44r	chr4	453318	CaMKI	EXON	39	0	0	5	44	17	0	0	0	17	5	44	0	17	chr4_453318
chr4	453339	453339	6.7	6.7%_60r	chr4	453339	CaMKI	EXON	56	0	0	4	60	24	0	0	0	24	4	60	0	24	chr4_453339
chr4	453341	453341	6.1	6.1%_66r	chr4	453341	CaMKI	EXON	62	0	0	4	66	28	0	0	0	28	4	66	0	28	chr4_453341
chr4	453436	453436	9.5	9.5%_42r	chr4	453436	CaMKI	EXON	38	0	0	4	42	19	0	0	0	19	4	42	0	19	chr4_453436
chr4	453448	453448	10.3	10.3%_39r	chr4	453448	CaMKI	EXON	35	0	0	4	39	17	0	0	0	17	4	39	0	17	chr4_453448
chr4	453564	453564	11.9	11.9%_67r	chr4	453564	CaMKI	EXON	58	1	0	8	67	26	0	0	0	26	8	67	0	26	chr4_453564
chr4	453573	453573	14.5	14.5%_83r	chr4	453573	CaMKI	EXON	71	0	0	12	83	30	0	0	0	30	12	83	0	30	chr4_453573
chr4	453588	453588	7.9	7.9%_63r	chr4	453588	CaMKI	EXON	58	0	0	5	63	16	0	0	0	16	5	63	0	16	chr4_453588
chr4	453616	453616	11.5	11.5%_61r	chr4	453616	CaMKI	EXON	54	0	0	7	61	10	0	0	0	10	7	61	0	10	chr4_453616
chr4	133607	133607	9.2	9.2%_142r	chr4	133607	CG32000	EXON	129	0	0	13	142	55	0	0	0	55	13	142	0	55	chr4_133607
chr4	133927	133927	12	12.0%_125r	chr4	133927	CG32000	EXON	110	0	0	15	125	57	0	0	0	57	15	125	0	57	chr4_133927
chr4	134029	134029	6.1	6.1%_66r	chr4	134029	CG32000	EXON	62	0	0	4	66	40	0	0	0	40	4	66	0	40	chr4_134029
chr4	134060	134060	7.7	7.7%_26r	chr4	134060	CG32000	EXON	24	0	0	2	26	22	0	0	0	22	2	26	0	22	chr4_134060
chr4	134152	134152	14.7	14.7%_34r	chr4	134152	CG32000	EXON	29	0	0	5	34	18	0	0	0	18	5	34	0	18	chr4_134152
chr4	134155	134155	25	25.0%_28r	chr4	134155	CG32000	EXON	20	1	0	7	28	11	0	0	0	11	7	28	0	11	chr4_134155
chr4	134305	134305	12	12.0%_25r	chr4	134305	CG32000	EXON	22	0	0	3	25	24	0	0	0	24	3	25	0	24	chr4_134305
chr4	134343	134343	9.5	9.5%_21r	chr4	134343	CG32000	EXON	19	0	0	2	21	14	0	0	0	14	2	21	0	14	chr4_134343
chr4	134367	134367	11.1	11.1%_27r	chr4	134367	CG32000	EXON	24	0	0	3	27	10	0	0	0	10	3	27	0	10	chr4_134367
chr4	134718	134718	9.1	9.1%_22r	chr4	134718	CG32000	EXON	20	0	0	2	22	12	0	0	0	12	2	22	0	12	chr4_134718
chr4	137018	137018	8.3	8.3%_24r	chr4	137018	CG32000	EXON	22	0	0	2	24	26	0	0	0	26	2	24	0	26	chr4_137018
chr4	137078	137078	21.7	21.7%_23r	chr4	137078	CG32000	EXON	18	0	0	5	23	15	0	0	0	15	5	23	0	15	chr4_137078
chr4	137112	137112	9.1	9.1%_22r	chr4	137112	CG32000	EXON	20	0	0	2	22	15	0	0	0	15	2	22	0	15	chr4_137112
chr4	137268	137268	22.7	22.7%_22r	chr4	137268	CG32000	EXON	17	0	0	5	22	24	0	0	0	24	5	22	0	24	chr4_137268
chr4	137465	137465	13	13.0%_23r	chr4	137465	CG32000	EXON	20	0	0	3	23	16	0	0	0	16	3	23	0	16	chr4_137465
chr4	137679	137679	12	12.0%_25r	chr4	137679	CG32000	EXON	22	0	0	3	25	18	0	0	0	18	3	25	0	18	chr4_137679
chr4	137701	137701	10.8	10.8%_37r	chr4	137701	CG32000	EXON	33	0	0	4	37	24	0	0	0	24	4	37	0	24	chr4_137701
chr4	137825	137825	11.5	11.5%_26r	chr4	137825	CG32000	EXON	23	0	0	3	26	15	0	0	0	15	3	26	0	15	chr4_137825
chr4	137833	137833	20	20.0%_30r	chr4	137833	CG32000	EXON	23	1	0	6	30	29	0	0	0	29	6	30	0	29	chr4_137833
chr4	137926	137926	6.2	6.2%_32r	chr4	137926	CG32000	EXON	30	0	0	2	32	27	0	0	0	27	2	32	0	27	chr4_137926
chr4	137935	137935	6.9	6.9%_29r	chr4	137935	CG32000	EXON	27	0	0	2	29	30	0	0	0	30	2	29	0	30	chr4_137935
chr4	137971	137971	6.7	6.7%_30r	chr4	137971	CG32000	EXON	28	0	0	2	30	27	0	0	0	27	2	30	0	27	chr4_137971
chr4	138010	138010	11.1	11.1%_36r	chr4	138010	CG32000	EXON	32	0	0	4	36	16	0	0	0	16	4	36	0	16	chr4_138010
chr4	138011	138011	10.8	10.8%_37r	chr4	138011	CG32000	EXON	33	0	0	4	37	16	0	0	0	16	4	37	0	16	chr4_138011
chr4	138028	138028	29	29.0%_31r	chr4	138028	CG32000	EXON	22	0	0	9	31	16	0	0	0	16	9	31	0	16	chr4_138028
chr4	138191	138191	17.4	17.4%_23r	chr4	138191	CG32000	EXON	19	0	0	4	23	29	0	0	0	29	4	23	0	29	chr4_138191
chr4	138193	138193	8.7	8.7%_23r	chr4	138193	CG32000	EXON	21	0	0	2	23	29	0	0	0	29	2	23	0	29	chr4_138193
chr4	138200	138200	9.1	9.1%_22r	chr4	138200	CG32000	EXON	20	0	0	2	22	29	0	0	0	29	2	22	0	29	chr4_138200
chr4	138294	138294	22.7	22.7%_22r	chr4	138294	CG32000	EXON	17	0	0	5	22	20	0	0	0	20	5	22	0	20	chr4_138294
chr4	138508	138508	23.8	23.8%_21r	chr4	138508	CG32000	EXON	16	0	0	5	21	20	0	0	0	20	5	21	0	20	chr4_138508
chr4	138511	138511	8.3	8.3%_24r	chr4	138511	CG32000	EXON	22	0	0	2	24	22	0	0	0	22	2	24	0	22	chr4_138511
chr4	138533	138533	10.7	10.7%_28r	chr4	138533	CG32000	EXON	25	0	0	3	28	29	0	0	0	29	3	28	0	29	chr4_138533
chr4	138554	138554	8.3	8.3%_24r	chr4	138554	CG32000	EXON	22	0	0	2	24	13	0	0	0	13	2	24	0	13	chr4_138554
chr4	140411	140411	20.8	20.8%_24r	chr4	140411	CG32000	EXON	19	0	0	5	24	27	0	0	0	27	5	24	0	27	chr4_140411
chr4	140723	140723	9.5	9.5%_21r	chr4	140723	CG32000	EXON	19	0	0	2	21	15	0	0	0	15	2	21	0	15	chr4_140723
chr4	140904	140904	8.7	8.7%_23r	chr4	140904	CG32000	EXON	21	0	0	2	23	25	0	0	0	25	2	23	0	25	chr4_140904
chr4	140906	140906	11.5	11.5%_26r	chr4	140906	CG32000	EXON	23	0	0	3	26	27	0	0	0	27	3	26	0	27	chr4_140906
chr4	140907	140907	11.1	11.1%_27r	chr4	140907	CG32000	EXON	24	0	0	3	27	27	0	0	0	27	3	27	0	27	chr4_140907
chr4	140916	140916	7.9	7.9%_38r	chr4	140916	CG32000	EXON	35	0	0	3	38	30	0	0	0	30	3	38	0	30	chr4_140916
chr4	141053	141053	9.1	9.1%_22r	chr4	141053	CG32000	EXON	20	0	0	2	22	17	0	0	0	17	2	22	0	17	chr4_141053
chr4	141240	141240	12	12.0%_25r	chr4	141240	CG32000	EXON	22	0	0	3	25	16	0	0	0	16	3	25	0	16	chr4_141240
chr4	141473	141473	15.6	15.6%_32r	chr4	141473	CG32000	EXON	27	0	0	5	32	21	0	0	0	21	5	32	0	21	chr4_141473
chr4	141711	141711	8	8.0%_25r	chr4	141711	CG32000	EXON	23	0	0	2	25	15	0	0	0	15	2	25	0	15	chr4_141711
chr4	141888	141888	17.4	17.4%_23r	chr4	141888	CG32000	EXON	19	0	0	4	23	33	0	0	0	33	4	23	0	33	chr4_141888
chr4	142078	142078	8.3	8.3%_24r	chr4	142078	CG32000	EXON	22	0	0	2	24	26	0	0	0	26	2	24	0	26	chr4_142078
chr4	142276	142276	29.6	29.6%_27r	chr4	142276	CG32000	EXON	19	0	0	8	27	20	0	0	0	20	8	27	0	20	chr4_142276
chr4	142295	142295	6.2	6.2%_32r	chr4	142295	CG32000	EXON	30	0	0	2	32	27	0	0	0	27	2	32	0	27	chr4_142295
chr4	142297	142297	9.4	9.4%_32r	chr4	142297	CG32000	EXON	29	0	0	3	32	28	0	0	0	28	3	32	0	28	chr4_142297
chr4	142301	142301	12.5	12.5%_32r	chr4	142301	CG32000	EXON	28	0	0	4	32	27	0	0	0	27	4	32	0	27	chr4_142301
chr4	142447	142447	26.5	26.5%_34r	chr4	142447	CG32000	EXON	25	0	0	9	34	17	0	0	0	17	9	34	0	17	chr4_142447
chr4	142567	142567	13.3	13.3%_30r	chr4	142567	CG32000	EXON	26	0	0	4	30	31	0	0	0	31	4	30	0	31	chr4_142567
chr4	142600	142600	12.5	12.5%_24r	chr4	142600	CG32000	EXON	21	0	0	3	24	23	0	0	0	23	3	24	0	23	chr4_142600
chr4	142601	142601	7.1	7.1%_28r	chr4	142601	CG32000	EXON	26	0	0	2	28	21	1	0	0	22	2	28	0	22	chr4_142601
chr4	142651	142651	28.6	28.6%_35r	chr4	142651	CG32000	EXON	25	0	0	10	35	16	0	0	0	16	10	35	0	16	chr4_142651
chr4	142680	142680	22	22.0%_41r	chr4	142680	CG32000	EXON	32	0	0	9	41	27	0	0	0	27	9	41	0	27	chr4_142680
chr4	142681	142681	41	41.0%_39r	chr4	142681	CG32000	EXON	22	1	0	16	39	26	0	0	0	26	16	39	0	26	chr4_142681
chr4	142690	142690	12.7	12.7%_55r	chr4	142690	CG32000	EXON	48	0	0	7	55	28	0	0	0	28	7	55	0	28	chr4_142690
chr4	142705	142705	8.9	8.9%_56r	chr4	142705	CG32000	EXON	51	0	0	5	56	31	0	0	0	31	5	56	0	31	chr4_142705
chr4	142715	142715	7.4	7.4%_54r	chr4	142715	CG32000	EXON	50	0	0	4	54	35	0	0	0	35	4	54	0	35	chr4_142715
chr4	142776	142776	20.8	20.8%_24r	chr4	142776	CG32000	EXON	19	0	0	5	24	22	0	0	0	22	5	24	0	22	chr4_142776
chr4	142822	142822	10.4	10.4%_48r	chr4	142822	CG32000	EXON	43	0	0	5	48	24	0	0	0	24	5	48	0	24	chr4_142822
chr4	142823	142823	9.8	9.8%_51r	chr4	142823	CG32000	EXON	46	0	0	5	51	31	0	0	0	31	5	51	0	31	chr4_142823
chr4	142838	142838	8.2	8.2%_49r	chr4	142838	CG32000	EXON	45	0	0	4	49	29	0	0	0	29	4	49	0	29	chr4_142838
chr4	142954	142954	10.7	10.7%_28r	chr4	142954	CG32000	EXON	25	0	0	3	28	18	0	0	0	18	3	28	0	18	chr4_142954
chr4	142959	142959	9.1	9.1%_33r	chr4	142959	CG32000	EXON	30	0	0	3	33	17	0	0	0	17	3	33	0	17	chr4_142959
chr4	142966	142966	28.1	28.1%_32r	chr4	142966	CG32000	EXON	23	0	0	9	32	14	0	0	0	14	9	32	0	14	chr4_142966
chr4	142969	142969	13.3	13.3%_30r	chr4	142969	CG32000	EXON	26	0	0	4	30	12	0	0	0	12	4	30	0	12	chr4_142969
chr4	143002	143002	12.8	12.8%_39r	chr4	143002	CG32000	EXON	34	0	0	5	39	23	0	0	0	23	5	39	0	23	chr4_143002
chr4	143079	143079	14	14.0%_50r	chr4	143079	CG32000	EXON	43	0	0	7	50	22	0	0	0	22	7	50	0	22	chr4_143079
chr4	308137	308137	7.4	7.4%_95r	chr4	308137	Rad23	EXON	88	0	0	7	95	22	0	0	0	22	7	95	0	22	chr4_308137
chr4	308257	308257	8.3	8.3%_327r	chr4	308257	Rad23	EXON	300	0	0	27	327	98	0	0	0	98	27	327	0	98	chr4_308257
chr4	308472	308472	6.5	6.5%_415r	chr4	308472	Rad23	EXON	388	0	0	27	415	129	0	0	0	129	27	415	0	129	chr4_308472
chr4	308549	308549	16.4	16.4%_506r	chr4	308549	Rad23	EXON	422	1	0	83	506	188	0	0	0	188	83	506	0	188	chr4_308549
chr4	308564	308564	9.7	9.7%_444r	chr4	308564	Rad23	EXON	401	0	0	43	444	155	0	0	0	155	43	444	0	155	chr4_308564
chr4	308599	308599	12.8	12.8%_499r	chr4	308599	Rad23	EXON	435	0	0	64	499	172	0	0	0	172	64	499	0	172	chr4_308599
chr4	308647	308647	10.7	10.7%_577r	chr4	308647	Rad23	EXON	515	0	0	62	577	184	0	0	0	184	62	577	0	184	chr4_308647
chr4	308663	308663	18.5	18.5%_633r	chr4	308663	Rad23	EXON	516	0	0	117	633	193	0	0	0	193	117	633	0	193	chr4_308663
chr4	308707	308707	11.9	11.9%_537r	chr4	308707	Rad23	EXON	473	0	0	64	537	173	0	0	0	173	64	537	0	173	chr4_308707
chr4	308726	308726	6.5	6.5%_558r	chr4	308726	Rad23	EXON	522	0	0	36	558	179	1	1	0	181	36	558	0	181	chr4_308726
chr4	308730	308730	8.3	8.3%_545r	chr4	308730	Rad23	EXON	500	0	0	45	545	177	0	0	0	177	45	545	0	177	chr4_308730
chr4	308749	308749	9.4	9.4%_572r	chr4	308749	Rad23	EXON	518	0	0	54	572	178	0	0	0	178	54	572	0	178	chr4_308749
chr4	308813	308813	8	8.0%_609r	chr4	308813	Rad23	EXON	559	0	1	49	609	185	0	0	0	185	49	609	0	185	chr4_308813
chr4	308818	308818	33.4	33.4%_631r	chr4	308818	Rad23	EXON	420	0	0	211	631	192	0	0	0	192	211	631	0	192	chr4_308818
chr4	308888	308888	10.6	10.6%_625r	chr4	308888	Rad23	EXON	558	1	0	66	625	191	0	0	0	191	66	625	0	191	chr4_308888
chr4	308895	308895	21.9	21.9%_653r	chr4	308895	Rad23	EXON	508	0	2	143	653	208	1	0	0	209	143	653	0	209	chr4_308895
chr4	308911	308911	7	7.0%_689r	chr4	308911	Rad23	EXON	640	1	0	48	689	226	0	0	0	226	48	689	0	226	chr4_308911
chr4	308986	308986	19.6	19.6%_736r	chr4	308986	Rad23	EXON	589	2	1	144	736	238	0	0	0	238	144	736	0	238	chr4_308986
chr4	309578	309578	11	11.0%_480r	chr4	309578	Rad23	EXON	426	1	0	53	480	134	0	0	0	134	53	480	0	134	chr4_309578
chr4	309792	309792	7	7.0%_426r	chr4	309792	Rad23	EXON	396	0	0	30	426	133	0	0	0	133	30	426	0	133	chr4_309792
chr4	309876	309876	8.3	8.3%_552r	chr4	309876	Rad23	EXON	506	0	0	46	552	185	0	0	0	185	46	552	0	185	chr4_309876
chr4	309888	309888	9.5	9.5%_527r	chr4	309888	Rad23	EXON	477	0	0	50	527	173	0	0	0	173	50	527	0	173	chr4_309888
chr4	309892	309892	32	32.0%_478r	chr4	309892	Rad23	EXON	325	0	0	153	478	154	0	0	0	154	153	478	0	154	chr4_309892
chr4	309897	309897	17.8	17.8%_461r	chr4	309897	Rad23	EXON	378	0	1	82	461	144	0	0	0	144	82	461	0	144	chr4_309897
chr4	309931	309931	7.6	7.6%_568r	chr4	309931	Rad23	EXON	524	0	1	43	568	201	1	0	0	202	43	568	0	202	chr4_309931
chr4	309936	309936	7.1	7.1%_539r	chr4	309936	Rad23	EXON	500	0	1	38	539	192	1	0	0	193	38	539	0	193	chr4_309936
chr4	309966	309966	9.5	9.5%_672r	chr4	309966	Rad23	EXON	607	0	1	64	672	274	0	1	0	275	64	672	0	275	chr4_309966
chr4	310011	310011	23.1	23.1%_519r	chr4	310011	Rad23	EXON	397	2	0	120	519	175	0	0	0	175	120	519	0	175	chr4_310011
chr4	310099	310099	6.6	6.6%_468r	chr4	310099	Rad23	EXON	437	0	0	31	468	140	0	0	0	140	31	468	0	140	chr4_310099
chr4	310111	310111	20.1	20.1%_422r	chr4	310111	Rad23	EXON	336	1	0	85	422	149	0	0	0	149	85	422	0	149	chr4_310111
chr4	310157	310157	30.4	30.4%_280r	chr4	310157	Rad23	EXON	195	0	0	85	280	103	0	0	0	103	85	280	0	103	chr4_310157
chr4	310175	310175	27.4	27.4%_420r	chr4	310175	Rad23	EXON	304	1	0	115	420	169	0	0	0	169	115	420	0	169	chr4_310175
chr4	310246	310246	6	6.0%_350r	chr4	310246	Rad23	EXON	329	0	0	21	350	98	0	0	0	98	21	350	0	98	chr4_310246
chr4	310279	310279	22	22.0%_191r	chr4	310279	Rad23	EXON	148	1	0	42	191	52	0	0	0	52	42	191	0	52	chr4_310279
chr4	310457	310457	29.9	29.9%_184r	chr4	310457	Rad23	EXON	129	0	0	55	184	42	0	0	0	42	55	184	0	42	chr4_310457
chr4	310473	310473	26.8	26.8%_224r	chr4	310473	Rad23	EXON	164	0	0	60	224	63	0	0	0	63	60	224	0	63	chr4_310473
chr4	310497	310497	20.8	20.8%_265r	chr4	310497	Rad23	EXON	210	0	0	55	265	89	0	0	0	89	55	265	0	89	chr4_310497
chr4	310517	310517	35.6	35.6%_253r	chr4	310517	Rad23	EXON	163	0	0	90	253	85	0	0	0	85	90	253	0	85	chr4_310517
chr4	310537	310537	8.2	8.2%_220r	chr4	310537	Rad23	EXON	201	1	0	18	220	56	0	0	0	56	18	220	0	56	chr4_310537
chr4	310541	310541	8.9	8.9%_190r	chr4	310541	Rad23	EXON	172	1	0	17	190	46	0	0	0	46	17	190	0	46	chr4_310541
chr4	310573	310573	6.2	6.2%_130r	chr4	310573	Rad23	EXON	122	0	0	8	130	31	0	0	0	31	8	130	0	31	chr4_310573
chr4	310618	310618	11.9	11.9%_67r	chr4	310618	Rad23	EXON	59	0	0	8	67	15	0	0	0	15	8	67	0	15	chr4_310618
chr4	310619	310619	37.5	37.5%_64r	chr4	310619	Rad23	EXON	40	0	0	24	64	14	0	0	0	14	24	64	0	14	chr4_310619
chr4	197123	197123	7.1	7.1%_28r	chr4	197123	CG31998	EXON	0	26	2	0	28	0	13	0	0	13	2	28	0	13	chr4_197123
chr4	198022	198022	9.5	9.5%_21r	chr4	198022	CG31998	EXON	0	19	2	0	21	0	16	0	0	16	2	21	0	16	chr4_198022
chr4	198579	198579	9.5	9.5%_21r	chr4	198579	CG31998	EXON	0	19	2	0	21	0	14	0	0	14	2	21	0	14	chr4_198579
chr4	198582	198582	23.8	23.8%_21r	chr4	198582	CG31998	EXON	0	16	5	0	21	0	15	0	0	15	5	21	0	15	chr4_198582
chr4	198999	198999	13.6	13.6%_22r	chr4	198999	CG31998	EXON	0	19	3	0	22	0	14	0	0	14	3	22	0	14	chr4_198999
chr4	199459	199459	12.5	12.5%_24r	chr4	199459	CG31998	EXON	0	21	3	0	24	0	19	0	0	19	3	24	0	19	chr4_199459
chr4	199641	199641	17.4	17.4%_23r	chr4	199641	CG31998	EXON	0	19	4	0	23	0	17	0	0	17	4	23	0	17	chr4_199641
chr4	199644	199644	34.6	34.6%_26r	chr4	199644	CG31998	EXON	0	17	9	0	26	0	18	0	0	18	9	26	0	18	chr4_199644
chr4	199661	199661	25	25.0%_32r	chr4	199661	CG31998	EXON	0	24	8	0	32	0	28	0	0	28	8	32	0	28	chr4_199661
chr4	200402	200402	15	15.0%_20r	chr4	200402	CG31998	EXON	0	17	3	0	20	0	11	0	0	11	3	20	0	11	chr4_200402
chr4	200682	200682	12.9	12.9%_31r	chr4	200682	CG31998	EXON	0	27	4	0	31	0	12	0	0	12	4	31	0	12	chr4_200682
chr4	200918	200918	8.7	8.7%_23r	chr4	200918	CG31998	EXON	0	21	2	0	23	0	14	0	0	14	2	23	0	14	chr4_200918
chr4	200919	200919	16.7	16.7%_24r	chr4	200919	CG31998	EXON	0	20	4	0	24	0	14	0	0	14	4	24	0	14	chr4_200919
chr4	201171	201171	8.7	8.7%_23r	chr4	201171	CG31998	EXON	0	21	2	0	23	0	27	0	0	27	2	23	0	27	chr4_201171
chr4	201192	201192	16.7	16.7%_48r	chr4	201192	CG31998	EXON	0	40	8	0	48	0	31	0	0	31	8	48	0	31	chr4_201192
chr4	201244	201244	22.2	22.2%_36r	chr4	201244	CG31998	EXON	0	28	8	0	36	0	28	0	0	28	8	36	0	28	chr4_201244
chr4	201492	201492	10.9	10.9%_64r	chr4	201492	CG31998	EXON	0	57	7	0	64	0	43	0	0	43	7	64	0	43	chr4_201492
chr4	204021	204021	11.1	11.1%_54r	chr4	204021	CG31998	EXON	0	48	6	0	54	0	56	0	0	56	6	54	0	56	chr4_204021
chr4	204133	204133	6.8	6.8%_73r	chr4	204133	CG31998	EXON	0	68	5	0	73	0	36	0	0	36	5	73	0	36	chr4_204133
chr4	204233	204233	10	10.0%_30r	chr4	204233	CG31998	EXON	0	27	3	0	30	0	26	0	0	26	3	30	0	26	chr4_204233
chr4	204394	204394	9.4	9.4%_53r	chr4	204394	CG31998	EXON	0	48	5	0	53	0	32	0	0	32	5	53	0	32	chr4_204394
chr4	204447	204447	10.3	10.3%_78r	chr4	204447	CG31998	EXON	0	70	8	0	78	0	31	0	0	31	8	78	0	31	chr4_204447
chr4	204545	204545	25	25.0%_28r	chr4	204545	CG31998	EXON	0	21	7	0	28	0	16	0	0	16	7	28	0	16	chr4_204545
chr4	204548	204548	7.4	7.4%_27r	chr4	204548	CG31998	EXON	0	25	2	0	27	0	15	0	0	15	2	27	0	15	chr4_204548
chr4	204660	204660	6.9	6.9%_29r	chr4	204660	CG31998	EXON	0	27	2	0	29	0	16	0	0	16	2	29	0	16	chr4_204660
chr4	204661	204661	11.1	11.1%_36r	chr4	204661	CG31998	EXON	0	32	4	0	36	0	18	0	0	18	4	36	0	18	chr4_204661
chr4	204684	204684	23.7	23.7%_59r	chr4	204684	CG31998	EXON	0	45	14	0	59	0	36	0	0	36	14	59	0	36	chr4_204684
chr4	204703	204703	7.5	7.5%_67r	chr4	204703	CG31998	EXON	0	62	5	0	67	0	37	0	0	37	5	67	0	37	chr4_204703
chr4	204745	204745	7.4	7.4%_27r	chr4	204745	CG31998	EXON	0	25	2	0	27	0	22	0	0	22	2	27	0	22	chr4_204745
chr4	205374	205374	8	8.0%_25r	chr4	205374	CG31998	INTRON	0	23	2	0	25	0	11	0	0	11	2	25	0	11	chr4_205374
chr4	205474	205474	7.9	7.9%_38r	chr4	205474	CG31998	INTRON	1	34	3	0	38	0	18	0	0	18	3	38	0	18	chr4_205474
chr4	205710	205710	6.2	6.2%_32r	chr4	205710	CG31998	EXON	0	30	2	0	32	0	18	0	0	18	2	32	0	18	chr4_205710
chr4	205718	205718	7.5	7.5%_40r	chr4	205718	CG31998	EXON	0	37	3	0	40	0	30	0	0	30	3	40	0	30	chr4_205718
chr4	205742	205742	11.8	11.8%_153r	chr4	205742	CG31998	EXON	0	135	18	0	153	0	106	0	0	106	18	153	0	106	chr4_205742
chr4	205771	205771	16.2	16.2%_111r	chr4	205771	CG31998	EXON	0	93	18	0	111	0	59	0	0	59	18	111	0	59	chr4_205771
chr4	205864	205864	6.5	6.5%_31r	chr4	205864	CG31998	EXON	0	29	2	0	31	0	18	0	0	18	2	31	0	18	chr4_205864
chr4	560145	560145	22.5	22.5%_40r	chr4	560145	Pur-alpha	EXON	31	0	0	9	40	10	0	0	0	10	9	40	0	10	chr4_560145
chr4	1028839	1028839	9.1	9.1%_339r	chr4	1028839	CG11077	EXON	2	306	31	0	339	1	141	0	0	142	31	339	0	142	chr4_1028839
chr4	1028846	1028846	34.6	34.6%_324r	chr4	1028846	CG11077	EXON	0	211	112	1	324	0	159	0	0	159	112	324	0	159	chr4_1028846
chr4	1028891	1028891	7.8	7.8%_474r	chr4	1028891	CG11077	EXON	0	436	37	1	474	1	220	0	0	221	37	474	0	221	chr4_1028891
chr4	1028977	1028977	7.9	7.9%_457r	chr4	1028977	CG11077	EXON	0	420	36	1	457	0	219	0	1	220	36	457	0	220	chr4_1028977
chr4	60086	60086	10.2	10.2%_49r	chr4	60086	CR43957	EXON	44	0	0	5	49	16	0	0	0	16	5	49	0	16	chr4_60086
chr4	60172	60172	10	10.0%_210r	chr4	60172	CR43957	EXON	189	0	0	21	210	59	0	0	0	59	21	210	0	59	chr4_60172
chr4	60195	60195	40.8	40.8%_125r	chr4	60195	CR43957	EXON	74	0	0	51	125	41	0	0	0	41	51	125	0	41	chr4_60195
chr4	60196	60196	21	21.0%_124r	chr4	60196	CR43957	EXON	98	0	0	26	124	41	0	0	0	41	26	124	0	41	chr4_60196
chr4	60261	60261	8.2	8.2%_110r	chr4	60261	CR43957	EXON	101	0	0	9	110	31	0	0	0	31	9	110	0	31	chr4_60261
chr4	60441	60441	7.4	7.4%_296r	chr4	60441	CR43957	INTRON	273	1	0	22	296	95	0	0	0	95	22	296	0	95	chr4_60441
chr4	60453	60453	11.2	11.2%_223r	chr4	60453	CR43957	INTRON	197	1	0	25	223	60	0	0	0	60	25	223	0	60	chr4_60453
chr4	60492	60492	12.1	12.1%_107r	chr4	60492	CR43957	INTRON	93	1	0	13	107	21	0	0	0	21	13	107	0	21	chr4_60492
chr4	60671	60671	11.1	11.1%_27r	chr4	60671	CR43957	EXON	23	1	0	3	27	10	0	0	0	10	3	27	0	10	chr4_60671
chr4	1233544	1233544	18.2	18.2%_22r	chr4	1233544	Caps	INTRON	18	0	0	4	22	11	0	0	0	11	4	22	0	11	chr4_1233544
chr4	42922	42922	8.5	8.5%_47r	chr4	42922	CR45124	EXON	43	0	0	4	47	19	0	0	0	19	4	47	0	19	chr4_42922
chr4	43034	43034	9.1	9.1%_44r	chr4	43034	CR45124	EXON	39	1	0	4	44	26	0	0	0	26	4	44	0	26	chr4_43034
chr4	43084	43084	11.1	11.1%_36r	chr4	43084	CR45124	EXON	32	0	0	4	36	13	0	0	0	13	4	36	0	13	chr4_43084
chr4	43110	43110	21.2	21.2%_33r	chr4	43110	CR45124	EXON	26	0	0	7	33	11	0	0	0	11	7	33	0	11	chr4_43110
chr4	43125	43125	9.5	9.5%_42r	chr4	43125	CR45124	EXON	38	0	0	4	42	14	0	0	0	14	4	42	0	14	chr4_43125
chr4	43130	43130	10.9	10.9%_46r	chr4	43130	CR45124	EXON	41	0	0	5	46	17	0	0	0	17	5	46	0	17	chr4_43130
chr4	43151	43151	10.2	10.2%_49r	chr4	43151	CR45124	EXON	44	0	0	5	49	16	0	0	0	16	5	49	0	16	chr4_43151
chr4	43192	43192	15.6	15.6%_32r	chr4	43192	CR45124	INTRON	27	0	0	5	32	16	0	0	0	16	5	32	0	16	chr4_43192
chr4	43324	43324	8.5	8.5%_47r	chr4	43324	CR45124	EXON	43	0	0	4	47	24	0	0	0	24	4	47	0	24	chr4_43324
chr4	43328	43328	9.1	9.1%_44r	chr4	43328	CR45124	EXON	40	0	0	4	44	20	0	0	0	20	4	44	0	20	chr4_43328
chr4	43368	43368	10.4	10.4%_96r	chr4	43368	CR45124	EXON	86	0	0	10	96	36	0	0	0	36	10	96	0	36	chr4_43368
chr4	40842	40842	20.7	20.7%_29r	chr4	40842	PlexB	EXON	0	23	6	0	29	0	23	0	0	23	6	29	0	23	chr4_40842
chr4	40945	40945	13.3	13.3%_30r	chr4	40945	PlexB	EXON	0	26	4	0	30	0	17	0	0	17	4	30	0	17	chr4_40945
chr4	40952	40952	7.7	7.7%_26r	chr4	40952	PlexB	EXON	0	24	2	0	26	0	11	0	0	11	2	26	0	11	chr4_40952
chr4	40958	40958	26.9	26.9%_26r	chr4	40958	PlexB	EXON	0	19	7	0	26	0	10	0	0	10	7	26	0	10	chr4_40958
chr4	41013	41013	8	8.0%_25r	chr4	41013	PlexB	EXON	0	23	2	0	25	0	15	0	0	15	2	25	0	15	chr4_41013
chr4	41026	41026	10.7	10.7%_28r	chr4	41026	PlexB	EXON	0	25	3	0	28	0	15	0	0	15	3	28	0	15	chr4_41026
chr4	41039	41039	10	10.0%_20r	chr4	41039	PlexB	EXON	0	18	2	0	20	0	10	0	0	10	2	20	0	10	chr4_41039
chr4	41159	41159	21.1	21.1%_38r	chr4	41159	PlexB	EXON	0	30	8	0	38	0	27	0	0	27	8	38	0	27	chr4_41159
chr4	41182	41182	19.4	19.4%_31r	chr4	41182	PlexB	EXON	0	25	6	0	31	0	17	0	0	17	6	31	0	17	chr4_41182
chr4	42915	42915	10	10.0%_40r	chr4	42915	PlexB	EXON	0	36	4	0	40	0	15	0	0	15	4	40	0	15	chr4_42915
chr4	42969	42969	6.7	6.7%_45r	chr4	42969	PlexB	EXON	0	42	3	0	45	0	23	0	0	23	3	45	0	23	chr4_42969
chr4	42985	42985	8.8	8.8%_34r	chr4	42985	PlexB	EXON	0	31	3	0	34	0	15	0	0	15	3	34	0	15	chr4_42985
chr4	43061	43061	8.7	8.7%_46r	chr4	43061	PlexB	EXON	0	42	4	0	46	0	20	0	0	20	4	46	0	20	chr4_43061
chr4	43069	43069	8.3	8.3%_36r	chr4	43069	PlexB	EXON	0	33	3	0	36	0	10	0	0	10	3	36	0	10	chr4_43069
chr4	43207	43207	9.1	9.1%_33r	chr4	43207	PlexB	EXON	0	30	3	0	33	0	17	0	0	17	3	33	0	17	chr4_43207
chr4	43380	43380	6.4	6.4%_78r	chr4	43380	PlexB	EXON	0	73	5	0	78	0	33	0	0	33	5	78	0	33	chr4_43380
chr4	43391	43391	10.7	10.7%_56r	chr4	43391	PlexB	EXON	0	50	6	0	56	0	31	0	0	31	6	56	0	31	chr4_43391
chr4	43398	43398	18.6	18.6%_43r	chr4	43398	PlexB	EXON	0	35	8	0	43	0	29	0	0	29	8	43	0	29	chr4_43398
chr4	43437	43437	12	12.0%_25r	chr4	43437	PlexB	EXON	0	22	3	0	25	0	19	0	0	19	3	25	0	19	chr4_43437
chr4	43646	43646	9.5	9.5%_21r	chr4	43646	PlexB	EXON	0	19	2	0	21	0	10	0	0	10	2	21	0	10	chr4_43646
chr4	855487	855487	10	10.0%_40r	chr4	855487	CG11148	EXON	0	36	4	0	40	0	20	0	0	20	4	40	0	20	chr4_855487
chr4	855536	855536	7.3	7.3%_41r	chr4	855536	CG11148	EXON	0	38	3	0	41	0	19	0	0	19	3	41	0	19	chr4_855536
chr4	855570	855570	17.9	17.9%_39r	chr4	855570	CG11148	EXON	0	32	7	0	39	0	19	0	0	19	7	39	0	19	chr4_855570
chr4	855718	855718	9.2	9.2%_65r	chr4	855718	CG11148	EXON	0	58	6	1	65	0	36	0	0	36	6	65	0	36	chr4_855718
chr4	855790	855790	9.4	9.4%_53r	chr4	855790	CG11148	EXON	0	48	5	0	53	0	36	0	1	37	5	53	0	37	chr4_855790
chr4	860324	860324	6.5	6.5%_62r	chr4	860324	CG11148	EXON	0	58	4	0	62	0	36	0	0	36	4	62	0	36	chr4_860324
chr4	860636	860636	8.7	8.7%_23r	chr4	860636	CG11148	EXON	0	21	2	0	23	0	14	0	0	14	2	23	0	14	chr4_860636
chr4	860687	860687	11.1	11.1%_36r	chr4	860687	CG11148	EXON	0	32	4	0	36	0	18	0	0	18	4	36	0	18	chr4_860687
chr4	861385	861385	7	7.0%_43r	chr4	861385	CG11148	EXON	0	40	3	0	43	0	18	0	0	18	3	43	0	18	chr4_861385
chr4	862011	862011	20.8	20.8%_24r	chr4	862011	CG11148	EXON	0	19	5	0	24	0	13	0	0	13	5	24	0	13	chr4_862011
chr4	862012	862012	7.4	7.4%_27r	chr4	862012	CG11148	EXON	0	25	2	0	27	0	13	0	0	13	2	27	0	13	chr4_862012
chr4	862030	862030	10.3	10.3%_39r	chr4	862030	CG11148	EXON	0	35	4	0	39	0	25	0	0	25	4	39	0	25	chr4_862030
chr4	862037	862037	13.2	13.2%_38r	chr4	862037	CG11148	EXON	0	33	5	0	38	0	28	0	0	28	5	38	0	28	chr4_862037
chr4	862078	862078	28.3	28.3%_53r	chr4	862078	CG11148	EXON	0	38	15	0	53	0	38	0	0	38	15	53	0	38	chr4_862078
chr4	862211	862211	18.3	18.3%_71r	chr4	862211	CG11148	EXON	0	58	13	0	71	0	39	0	0	39	13	71	0	39	chr4_862211
chr4	862264	862264	12.1	12.1%_33r	chr4	862264	CG11148	EXON	0	29	4	0	33	0	20	0	0	20	4	33	0	20	chr4_862264
chr4	862276	862276	17.6	17.6%_34r	chr4	862276	CG11148	EXON	0	27	6	1	34	0	21	0	0	21	6	34	0	21	chr4_862276
chr4	862316	862316	18.3	18.3%_82r	chr4	862316	CG11148	EXON	0	67	15	0	82	0	42	0	0	42	15	82	0	42	chr4_862316
chr4	862548	862548	7.1	7.1%_42r	chr4	862548	CG11148	EXON	0	39	3	0	42	0	33	0	0	33	3	42	0	33	chr4_862548
chr4	862827	862827	12.3	12.3%_65r	chr4	862827	CG11148	EXON	0	57	8	0	65	1	37	0	0	38	8	65	0	38	chr4_862827
chr4	862874	862874	15.8	15.8%_76r	chr4	862874	CG11148	EXON	0	64	12	0	76	0	27	0	0	27	12	76	0	27	chr4_862874
chr4	862906	862906	9.4	9.4%_53r	chr4	862906	CG11148	EXON	0	48	5	0	53	0	19	0	0	19	5	53	0	19	chr4_862906
chr4	862917	862917	6.4	6.4%_47r	chr4	862917	CG11148	EXON	0	44	3	0	47	0	17	0	0	17	3	47	0	17	chr4_862917
chr4	862940	862940	11.1	11.1%_36r	chr4	862940	CG11148	EXON	0	32	4	0	36	1	18	0	0	19	4	36	0	19	chr4_862940
chr4	862982	862982	6.7	6.7%_45r	chr4	862982	CG11148	EXON	0	42	3	0	45	0	20	0	0	20	3	45	0	20	chr4_862982
chr4	863152	863152	15	15.0%_40r	chr4	863152	CG11148	EXON	0	34	6	0	40	0	21	0	0	21	6	40	0	21	chr4_863152
chr4	863179	863179	7.3	7.3%_41r	chr4	863179	CG11148	EXON	0	37	3	1	41	0	24	0	0	24	3	41	0	24	chr4_863179
chr4	863180	863180	27.5	27.5%_40r	chr4	863180	CG11148	EXON	0	29	11	0	40	0	24	0	0	24	11	40	0	24	chr4_863180
chr4	863181	863181	7.3	7.3%_41r	chr4	863181	CG11148	EXON	0	38	3	0	41	0	24	0	0	24	3	41	0	24	chr4_863181
chr4	863325	863325	6.6	6.6%_76r	chr4	863325	CG11148	EXON	0	71	5	0	76	0	31	0	0	31	5	76	0	31	chr4_863325
chr4	863346	863346	7.2	7.2%_69r	chr4	863346	CG11148	EXON	0	64	5	0	69	1	30	0	0	31	5	69	0	31	chr4_863346
chr4	863347	863347	32.8	32.8%_64r	chr4	863347	CG11148	EXON	0	43	21	0	64	0	28	0	0	28	21	64	0	28	chr4_863347
chr4	863717	863717	6.1	6.1%_82r	chr4	863717	CG11148	EXON	0	77	5	0	82	0	32	0	0	32	5	82	0	32	chr4_863717
chr4	863773	863773	18.9	18.9%_37r	chr4	863773	CG11148	EXON	0	30	7	0	37	0	16	0	0	16	7	37	0	16	chr4_863773
chr4	863774	863774	6.1	6.1%_33r	chr4	863774	CG11148	EXON	0	31	2	0	33	0	13	0	0	13	2	33	0	13	chr4_863774
chr4	863780	863780	11.4	11.4%_35r	chr4	863780	CG11148	EXON	0	31	4	0	35	0	11	0	0	11	4	35	0	11	chr4_863780
chr4	863819	863819	7.4	7.4%_68r	chr4	863819	CG11148	EXON	0	63	5	0	68	0	20	0	0	20	5	68	0	20	chr4_863819
chr4	863849	863849	7.9	7.9%_63r	chr4	863849	CG11148	EXON	0	58	5	0	63	0	35	0	0	35	5	63	0	35	chr4_863849
chr4	863850	863850	25	25.0%_64r	chr4	863850	CG11148	EXON	0	48	16	0	64	0	35	0	0	35	16	64	0	35	chr4_863850
chr4	863927	863927	6.8	6.8%_74r	chr4	863927	CG11148	EXON	0	69	5	0	74	0	37	0	0	37	5	74	0	37	chr4_863927
chr4	863995	863995	10.7	10.7%_56r	chr4	863995	CG11148	EXON	0	50	6	0	56	0	32	0	0	32	6	56	0	32	chr4_863995
chr4	864082	864082	9.1	9.1%_77r	chr4	864082	CG11148	EXON	0	70	7	0	77	0	43	0	0	43	7	77	0	43	chr4_864082
chr4	864103	864103	6.7	6.7%_60r	chr4	864103	CG11148	EXON	0	56	4	0	60	0	41	0	0	41	4	60	0	41	chr4_864103
chr4	864124	864124	37.5	37.5%_40r	chr4	864124	CG11148	EXON	0	25	15	0	40	0	33	0	0	33	15	40	0	33	chr4_864124
chr4	864152	864152	14.3	14.3%_28r	chr4	864152	CG11148	EXON	0	24	4	0	28	0	19	0	0	19	4	28	0	19	chr4_864152
chr4	864403	864403	8.5	8.5%_71r	chr4	864403	CG11148	EXON	0	65	6	0	71	0	36	0	0	36	6	71	0	36	chr4_864403
chr4	865472	865472	14.6	14.6%_48r	chr4	865472	CG11148	EXON	1	40	7	0	48	0	41	0	0	41	7	48	0	41	chr4_865472
chr4	865722	865722	8.3	8.3%_108r	chr4	865722	CG11148	EXON	0	99	9	0	108	0	63	0	0	63	9	108	0	63	chr4_865722
chr4	865830	865830	14.3	14.3%_56r	chr4	865830	CG11148	EXON	0	48	8	0	56	0	40	0	0	40	8	56	0	40	chr4_865830
chr4	866099	866099	7.3	7.3%_55r	chr4	866099	CG11148	EXON	0	51	4	0	55	0	44	0	0	44	4	55	0	44	chr4_866099
chr4	866105	866105	7.1	7.1%_56r	chr4	866105	CG11148	EXON	0	52	4	0	56	0	38	0	0	38	4	56	0	38	chr4_866105
chr4	1192581	1192581	20.9	20.9%_182r	chr4	1192581	PIP4K	EXON	0	144	38	0	182	0	85	0	0	85	38	182	0	85	chr4_1192581
chr4	1192755	1192755	8	8.0%_188r	chr4	1192755	PIP4K	EXON	0	173	15	0	188	0	71	0	0	71	15	188	0	71	chr4_1192755
chr4	1193561	1193561	18.1	18.1%_144r	chr4	1193561	PIP4K	EXON	1	117	26	0	144	0	45	0	0	45	26	144	0	45	chr4_1193561
chr4	1193725	1193725	15.3	15.3%_268r	chr4	1193725	PIP4K	EXON	2	224	41	1	268	0	99	0	0	99	41	268	0	99	chr4_1193725
chr4	1193831	1193831	27.5	27.5%_306r	chr4	1193831	PIP4K	EXON	0	222	84	0	306	0	129	0	0	129	84	306	0	129	chr4_1193831
chr4	1195438	1195438	12.3	12.3%_367r	chr4	1195438	PIP4K	EXON	0	322	45	0	367	0	134	0	0	134	45	367	0	134	chr4_1195438
chr4	1195439	1195439	14.5	14.5%_365r	chr4	1195439	PIP4K	EXON	1	311	53	0	365	0	134	0	0	134	53	365	0	134	chr4_1195439
chr4	1195466	1195466	6.8	6.8%_309r	chr4	1195466	PIP4K	EXON	0	287	21	1	309	0	111	0	0	111	21	309	0	111	chr4_1195466
chr4	1195725	1195725	16.3	16.3%_577r	chr4	1195725	PIP4K	EXON	0	483	94	0	577	0	237	0	0	237	94	577	0	237	chr4_1195725
chr4	1195742	1195742	7.6	7.6%_490r	chr4	1195742	PIP4K	EXON	1	452	37	0	490	0	222	0	0	222	37	490	0	222	chr4_1195742
chr4	1195852	1195852	6.1	6.1%_326r	chr4	1195852	PIP4K	EXON	0	306	20	0	326	0	144	0	0	144	20	326	0	144	chr4_1195852
chr4	1195881	1195881	7.9	7.9%_229r	chr4	1195881	PIP4K	EXON	0	211	18	0	229	0	85	0	0	85	18	229	0	85	chr4_1195881
chr4	1195949	1195949	7.6	7.6%_263r	chr4	1195949	PIP4K	EXON	0	243	20	0	263	0	79	0	0	79	20	263	0	79	chr4_1195949
chr4	1196067	1196067	7	7.0%_214r	chr4	1196067	PIP4K	EXON	1	198	15	0	214	0	96	0	0	96	15	214	0	96	chr4_1196067
chr4	1196069	1196069	28.7	28.7%_216r	chr4	1196069	PIP4K	EXON	1	153	62	0	216	0	96	0	0	96	62	216	0	96	chr4_1196069
chr4	1196177	1196177	17.1	17.1%_252r	chr4	1196177	PIP4K	EXON	1	208	43	0	252	0	98	0	0	98	43	252	0	98	chr4_1196177
chr4	1196370	1196370	7.5	7.5%_213r	chr4	1196370	PIP4K	EXON	0	197	16	0	213	0	75	0	0	75	16	213	0	75	chr4_1196370
chr4	1196800	1196800	6.2	6.2%_112r	chr4	1196800	PIP4K	EXON	0	105	7	0	112	0	33	0	0	33	7	112	0	33	chr4_1196800
chr4	568376	568376	11.5	11.5%_296r	chr4	568376	CG1970	EXON	0	262	34	0	296	0	133	0	0	133	34	296	0	133	chr4_568376
chr4	568402	568402	9.6	9.6%_229r	chr4	568402	CG1970	EXON	0	207	22	0	229	0	116	0	0	116	22	229	0	116	chr4_568402
chr4	568454	568454	14.5	14.5%_228r	chr4	568454	CG1970	EXON	0	195	33	0	228	1	94	0	0	95	33	228	0	95	chr4_568454
chr4	568598	568598	8.9	8.9%_427r	chr4	568598	CG1970	EXON	1	388	38	0	427	0	159	0	0	159	38	427	0	159	chr4_568598
chr4	568779	568779	15.5	15.5%_336r	chr4	568779	CG1970	EXON	1	283	52	0	336	0	149	0	0	149	52	336	0	149	chr4_568779
chr4	569135	569135	8	8.0%_427r	chr4	569135	CG1970	EXON	0	393	34	0	427	0	155	0	0	155	34	427	0	155	chr4_569135
chr4	569251	569251	23.5	23.5%_378r	chr4	569251	CG1970	EXON	0	289	89	0	378	0	147	0	0	147	89	378	0	147	chr4_569251
chr4	570453	570453	7.2	7.2%_391r	chr4	570453	CG1970	EXON	1	362	28	0	391	0	164	0	0	164	28	391	0	164	chr4_570453
chr4	570748	570748	6.2	6.2%_146r	chr4	570748	CG1970	EXON	0	137	9	0	146	0	53	0	0	53	9	146	0	53	chr4_570748
chr4	467753	467753	6.1	6.1%_197r	chr4	467753	pncr013:4	EXON	185	0	0	12	197	50	0	0	0	50	12	197	0	50	chr4_467753
chr4	467954	467954	9.9	9.9%_203r	chr4	467954	pncr013:4	EXON	183	0	0	20	203	50	0	0	0	50	20	203	0	50	chr4_467954
chr4	467993	467993	14.3	14.3%_126r	chr4	467993	pncr013:4	EXON	108	0	0	18	126	47	0	0	0	47	18	126	0	47	chr4_467993
chr4	468066	468066	8.6	8.6%_105r	chr4	468066	pncr013:4	EXON	96	0	0	9	105	21	0	0	0	21	9	105	0	21	chr4_468066
chr4	468103	468103	25	25.0%_76r	chr4	468103	pncr013:4	EXON	57	0	0	19	76	17	0	0	0	17	19	76	0	17	chr4_468103
chr4	468115	468115	10.8	10.8%_65r	chr4	468115	pncr013:4	EXON	58	0	0	7	65	14	0	0	0	14	7	65	0	14	chr4_468115
chr4	468179	468179	20	20.0%_60r	chr4	468179	pncr013:4	EXON	48	0	0	12	60	12	0	0	0	12	12	60	0	12	chr4_468179
chr4	468182	468182	6.2	6.2%_64r	chr4	468182	pncr013:4	EXON	60	0	0	4	64	14	0	0	0	14	4	64	0	14	chr4_468182
chr4	468196	468196	7.5	7.5%_67r	chr4	468196	pncr013:4	EXON	61	1	0	5	67	16	0	0	0	16	5	67	0	16	chr4_468196
chr4	468197	468197	6.1	6.1%_66r	chr4	468197	pncr013:4	EXON	62	0	0	4	66	15	0	0	0	15	4	66	0	15	chr4_468197
chr4	468377	468377	7.5	7.5%_40r	chr4	468377	pncr013:4	EXON	37	0	0	3	40	11	0	0	0	11	3	40	0	11	chr4_468377
chr4	468940	468940	9.5	9.5%_21r	chr4	468940	pncr013:4	EXON	19	0	0	2	21	12	0	0	0	12	2	21	0	12	chr4_468940
chr4	469101	469101	10.8	10.8%_37r	chr4	469101	pncr013:4	INTRON	33	0	0	4	37	10	0	0	0	10	4	37	0	10	chr4_469101
chr4	469115	469115	27.8	27.8%_36r	chr4	469115	pncr013:4	INTRON	26	0	0	10	36	10	0	0	0	10	10	36	0	10	chr4_469115
chr4	469127	469127	6.9	6.9%_29r	chr4	469127	pncr013:4	INTRON	27	0	0	2	29	11	0	0	0	11	2	29	0	11	chr4_469127
chr4	469196	469196	8.8	8.8%_125r	chr4	469196	pncr013:4	EXON	114	0	0	11	125	37	0	0	0	37	11	125	0	37	chr4_469196
chr4	469257	469257	8.8	8.8%_194r	chr4	469257	pncr013:4	EXON	177	0	0	17	194	62	0	0	0	62	17	194	0	62	chr4_469257
chr4	469273	469273	9.8	9.8%_163r	chr4	469273	pncr013:4	EXON	147	0	0	16	163	45	0	0	0	45	16	163	0	45	chr4_469273
chr4	469322	469322	9.1	9.1%_88r	chr4	469322	pncr013:4	EXON	80	0	0	8	88	25	0	0	0	25	8	88	0	25	chr4_469322
chr4	471024	471024	8.4	8.4%_143r	chr4	471024	pncr013:4	EXON	131	0	0	12	143	46	0	0	0	46	12	143	0	46	chr4_471024
chr4	471025	471025	11.1	11.1%_144r	chr4	471025	pncr013:4	EXON	128	0	0	16	144	47	0	0	0	47	16	144	0	47	chr4_471025
chr4	471076	471076	16.1	16.1%_112r	chr4	471076	pncr013:4	EXON	93	0	1	18	112	25	0	0	0	25	18	112	0	25	chr4_471076
chr4	471090	471090	6.8	6.8%_88r	chr4	471090	pncr013:4	EXON	82	0	0	6	88	23	0	0	0	23	6	88	0	23	chr4_471090
chr4	471100	471100	29.8	29.8%_124r	chr4	471100	pncr013:4	EXON	86	1	0	37	124	28	0	0	0	28	37	124	0	28	chr4_471100
chr4	471198	471198	25.7	25.7%_136r	chr4	471198	pncr013:4	EXON	101	0	0	35	136	27	0	0	0	27	35	136	0	27	chr4_471198
chr4	471245	471245	7.8	7.8%_115r	chr4	471245	pncr013:4	EXON	106	0	0	9	115	24	1	0	0	25	9	115	0	25	chr4_471245
chr4	471270	471270	7	7.0%_86r	chr4	471270	pncr013:4	EXON	80	0	0	6	86	15	0	1	0	16	6	86	0	16	chr4_471270
chr4	471351	471351	8.4	8.4%_95r	chr4	471351	pncr013:4	EXON	87	0	0	8	95	22	0	0	0	22	8	95	0	22	chr4_471351
chr4	545311	545311	10.3	10.3%_39r	chr4	545311	Thd1	EXON	0	35	4	0	39	0	19	0	0	19	4	39	0	19	chr4_545311
chr4	545476	545476	23.1	23.1%_26r	chr4	545476	Thd1	EXON	0	20	6	0	26	0	18	0	0	18	6	26	0	18	chr4_545476
chr4	545477	545477	10.3	10.3%_29r	chr4	545477	Thd1	EXON	0	26	3	0	29	0	20	0	0	20	3	29	0	20	chr4_545477
chr4	545478	545478	10.3	10.3%_29r	chr4	545478	Thd1	EXON	0	26	3	0	29	0	20	0	0	20	3	29	0	20	chr4_545478
chr4	545486	545486	7.1	7.1%_42r	chr4	545486	Thd1	EXON	0	39	3	0	42	0	20	0	0	20	3	42	0	20	chr4_545486
chr4	545503	545503	68.6	68.6%_51r	chr4	545503	Thd1	EXON	0	16	35	0	51	0	30	0	0	30	35	51	0	30	chr4_545503
chr4	545586	545586	8.6	8.6%_35r	chr4	545586	Thd1	EXON	0	32	3	0	35	0	20	0	0	20	3	35	0	20	chr4_545586
chr4	545593	545593	58.8	58.8%_34r	chr4	545593	Thd1	EXON	0	14	20	0	34	0	18	0	0	18	20	34	0	18	chr4_545593
chr4	545659	545659	20	20.0%_25r	chr4	545659	Thd1	EXON	0	20	5	0	25	0	17	0	0	17	5	25	0	17	chr4_545659
chr4	545893	545893	6.4	6.4%_47r	chr4	545893	Thd1	EXON	0	44	3	0	47	0	34	0	0	34	3	47	0	34	chr4_545893
chr4	546353	546353	6.1	6.1%_33r	chr4	546353	Thd1	EXON	0	31	2	0	33	0	21	0	0	21	2	33	0	21	chr4_546353
chr4	546696	546696	14.3	14.3%_21r	chr4	546696	Thd1	EXON	0	18	3	0	21	0	28	0	0	28	3	21	0	28	chr4_546696
chr4	546850	546850	6.1	6.1%_49r	chr4	546850	Thd1	EXON	0	46	3	0	49	0	51	0	0	51	3	49	0	51	chr4_546850
chr4	547148	547148	9.5	9.5%_21r	chr4	547148	Thd1	EXON	0	19	2	0	21	0	28	0	0	28	2	21	0	28	chr4_547148
chr4	547154	547154	10	10.0%_20r	chr4	547154	Thd1	EXON	0	18	2	0	20	0	29	0	0	29	2	20	0	29	chr4_547154
chr4	547533	547533	17.4	17.4%_23r	chr4	547533	Thd1	EXON	0	19	4	0	23	0	25	0	0	25	4	23	0	25	chr4_547533
chr4	547706	547706	9.5	9.5%_21r	chr4	547706	Thd1	EXON	0	19	2	0	21	0	38	0	0	38	2	21	0	38	chr4_547706
chr4	547873	547873	20	20.0%_25r	chr4	547873	Thd1	EXON	0	20	5	0	25	0	34	0	0	34	5	25	0	34	chr4_547873
chr4	547897	547897	19	19.0%_21r	chr4	547897	Thd1	EXON	0	17	4	0	21	0	29	0	0	29	4	21	0	29	chr4_547897
chr4	551128	551128	6.7	6.7%_30r	chr4	551128	Thd1	EXON	0	28	2	0	30	0	30	0	0	30	2	30	0	30	chr4_551128
chr4	552258	552258	10	10.0%_20r	chr4	552258	Thd1	EXON	0	18	2	0	20	1	21	0	0	22	2	20	0	22	chr4_552258
chr4	552276	552276	9.1	9.1%_33r	chr4	552276	Thd1	EXON	0	30	3	0	33	0	26	0	0	26	3	33	0	26	chr4_552276
chr4	552537	552537	6.2	6.2%_32r	chr4	552537	Thd1	EXON	0	30	2	0	32	0	25	0	0	25	2	32	0	25	chr4_552537
chr4	552557	552557	10.8	10.8%_37r	chr4	552557	Thd1	EXON	0	33	4	0	37	0	22	0	0	22	4	37	0	22	chr4_552557
chr4	552661	552661	10.8	10.8%_37r	chr4	552661	Thd1	EXON	0	33	4	0	37	0	28	0	2	30	4	37	0	30	chr4_552661
chr4	552679	552679	6.5	6.5%_31r	chr4	552679	Thd1	EXON	0	29	2	0	31	0	37	0	0	37	2	31	0	37	chr4_552679
chr4	552722	552722	9.7	9.7%_31r	chr4	552722	Thd1	EXON	0	28	3	0	31	0	31	0	0	31	3	31	0	31	chr4_552722
chr4	552745	552745	8.7	8.7%_23r	chr4	552745	Thd1	EXON	0	21	2	0	23	0	29	0	0	29	2	23	0	29	chr4_552745
chr4	552814	552814	17	17.0%_53r	chr4	552814	Thd1	EXON	0	44	9	0	53	0	74	0	0	74	9	53	0	74	chr4_552814
chr4	552896	552896	6.9	6.9%_29r	chr4	552896	Thd1	EXON	0	27	2	0	29	0	40	0	0	40	2	29	0	40	chr4_552896
chr4	552897	552897	6.7	6.7%_30r	chr4	552897	Thd1	EXON	0	28	2	0	30	0	41	0	0	41	2	30	0	41	chr4_552897
chr4	552927	552927	6.5	6.5%_31r	chr4	552927	Thd1	EXON	0	29	2	0	31	0	36	0	0	36	2	31	0	36	chr4_552927
chr4	552944	552944	13.3	13.3%_30r	chr4	552944	Thd1	EXON	0	26	4	0	30	0	30	0	0	30	4	30	0	30	chr4_552944
chr4	552955	552955	12.5	12.5%_32r	chr4	552955	Thd1	EXON	0	28	4	0	32	0	38	0	0	38	4	32	0	38	chr4_552955
chr4	553131	553131	9.7	9.7%_31r	chr4	553131	Thd1	EXON	0	28	3	0	31	0	30	0	0	30	3	31	0	30	chr4_553131
chr4	553254	553254	7.4	7.4%_68r	chr4	553254	Thd1	EXON	0	63	5	0	68	0	67	0	0	67	5	68	0	67	chr4_553254
chr4	553269	553269	28.6	28.6%_84r	chr4	553269	Thd1	EXON	0	60	24	0	84	0	63	0	0	63	24	84	0	63	chr4_553269
chr4	553358	553358	25	25.0%_44r	chr4	553358	Thd1	EXON	0	33	11	0	44	0	49	0	0	49	11	44	0	49	chr4_553358
chr4	553395	553395	9.1	9.1%_55r	chr4	553395	Thd1	EXON	0	50	5	0	55	0	50	0	0	50	5	55	0	50	chr4_553395
chr4	553427	553427	11.7	11.7%_60r	chr4	553427	Thd1	EXON	0	53	7	0	60	0	54	0	0	54	7	60	0	54	chr4_553427
chr4	553514	553514	10.1	10.1%_79r	chr4	553514	Thd1	EXON	0	71	8	0	79	0	73	0	0	73	8	79	0	73	chr4_553514
chr4	553527	553527	70.5	70.5%_78r	chr4	553527	Thd1	EXON	0	23	55	0	78	0	71	0	0	71	55	78	0	71	chr4_553527
chr4	553564	553564	6.4	6.4%_78r	chr4	553564	Thd1	EXON	0	73	5	0	78	0	63	0	0	63	5	78	0	63	chr4_553564
chr4	553571	553571	34.2	34.2%_79r	chr4	553571	Thd1	EXON	0	52	27	0	79	0	62	0	0	62	27	79	0	62	chr4_553571
chr4	553572	553572	36.9	36.9%_84r	chr4	553572	Thd1	EXON	0	53	31	0	84	0	67	0	0	67	31	84	0	67	chr4_553572
chr4	553621	553621	6.1	6.1%_82r	chr4	553621	Thd1	EXON	0	76	5	1	82	0	66	0	0	66	5	82	0	66	chr4_553621
chr4	553637	553637	18.4	18.4%_103r	chr4	553637	Thd1	EXON	0	84	19	0	103	0	83	0	0	83	19	103	0	83	chr4_553637
chr4	557196	557196	17.5	17.5%_57r	chr4	557196	Thd1	INTRON	0	47	10	0	57	0	20	0	0	20	10	57	0	20	chr4_557196
chr4	557253	557253	10.1	10.1%_217r	chr4	557253	Thd1	INTRON	0	195	22	0	217	0	138	0	0	138	22	217	0	138	chr4_557253
chr4	557256	557256	14.5	14.5%_200r	chr4	557256	Thd1	INTRON	1	170	29	0	200	0	125	0	0	125	29	200	0	125	chr4_557256
chr4	557633	557633	30	30.0%_230r	chr4	557633	Thd1	EXON	0	161	69	0	230	0	128	0	0	128	69	230	0	128	chr4_557633
chr4	557685	557685	7.3	7.3%_110r	chr4	557685	Thd1	EXON	0	102	8	0	110	0	52	0	0	52	8	110	0	52	chr4_557685
chr4	557777	557777	6.8	6.8%_88r	chr4	557777	Thd1	EXON	0	82	6	0	88	0	37	0	0	37	6	88	0	37	chr4_557777
chr4	1037221	1037221	6.5	6.5%_138r	chr4	1037221	CaMKII	EXON	0	129	9	0	138	0	57	0	0	57	9	138	0	57	chr4_1037221
chr4	1037255	1037255	6.6	6.6%_167r	chr4	1037255	CaMKII	EXON	0	156	11	0	167	0	72	0	0	72	11	167	0	72	chr4_1037255
chr4	1037257	1037257	13.3	13.3%_165r	chr4	1037257	CaMKII	EXON	0	143	22	0	165	0	71	0	0	71	22	165	0	71	chr4_1037257
chr4	1037290	1037290	62.6	62.6%_107r	chr4	1037290	CaMKII	EXON	0	40	67	0	107	0	73	0	0	73	67	107	0	73	chr4_1037290
chr4	1037359	1037359	18.5	18.5%_54r	chr4	1037359	CaMKII	EXON	0	44	10	0	54	0	24	0	0	24	10	54	0	24	chr4_1037359
chr4	1037476	1037476	14.4	14.4%_167r	chr4	1037476	CaMKII	EXON	0	143	24	0	167	0	69	0	0	69	24	167	0	69	chr4_1037476
chr4	1037548	1037548	7.6	7.6%_184r	chr4	1037548	CaMKII	EXON	0	170	14	0	184	0	86	0	0	86	14	184	0	86	chr4_1037548
chr4	1037571	1037571	19.2	19.2%_120r	chr4	1037571	CaMKII	EXON	0	97	23	0	120	0	32	0	0	32	23	120	0	32	chr4_1037571
chr4	1038420	1038420	11.2	11.2%_187r	chr4	1038420	CaMKII	EXON	0	166	21	0	187	0	84	0	0	84	21	187	0	84	chr4_1038420
chr4	1040014	1040014	8.8	8.8%_34r	chr4	1040014	CaMKII	EXON	0	31	3	0	34	0	15	0	0	15	3	34	0	15	chr4_1040014
chr4	1045157	1045157	6.7	6.7%_194r	chr4	1045157	CaMKII	EXON	0	181	13	0	194	0	74	0	0	74	13	194	0	74	chr4_1045157
chr4	1045180	1045180	6.4	6.4%_171r	chr4	1045180	CaMKII	EXON	0	160	11	0	171	0	84	0	0	84	11	171	0	84	chr4_1045180
chr4	1047331	1047331	12.4	12.4%_170r	chr4	1047331	CaMKII	EXON	0	149	21	0	170	0	62	0	0	62	21	170	0	62	chr4_1047331
chr4	1047336	1047336	10.7	10.7%_178r	chr4	1047336	CaMKII	EXON	0	159	19	0	178	0	67	0	0	67	19	178	0	67	chr4_1047336
chr4	1047540	1047540	7.7	7.7%_209r	chr4	1047540	CaMKII	EXON	0	193	16	0	209	0	86	0	0	86	16	209	0	86	chr4_1047540
chr4	1047663	1047663	9.5	9.5%_169r	chr4	1047663	CaMKII	EXON	0	153	16	0	169	0	75	0	0	75	16	169	0	75	chr4_1047663
chr4	1047713	1047713	12.3	12.3%_204r	chr4	1047713	CaMKII	EXON	0	179	25	0	204	0	117	0	0	117	25	204	0	117	chr4_1047713
chr4	1047869	1047869	9.3	9.3%_214r	chr4	1047869	CaMKII	EXON	2	192	20	0	214	0	102	0	0	102	20	214	0	102	chr4_1047869
chr4	1047895	1047895	11.4	11.4%_167r	chr4	1047895	CaMKII	EXON	0	148	19	0	167	0	81	0	0	81	19	167	0	81	chr4_1047895
chr4	1047968	1047968	7.3	7.3%_193r	chr4	1047968	CaMKII	EXON	0	179	14	0	193	0	95	0	0	95	14	193	0	95	chr4_1047968
chr4	1047971	1047971	6.7	6.7%_194r	chr4	1047971	CaMKII	EXON	0	180	13	1	194	0	103	0	0	103	13	194	0	103	chr4_1047971
chr4	1048082	1048082	37.9	37.9%_203r	chr4	1048082	CaMKII	EXON	1	125	77	0	203	0	108	0	0	108	77	203	0	108	chr4_1048082
chr4	1048094	1048094	10.2	10.2%_157r	chr4	1048094	CaMKII	EXON	0	141	16	0	157	0	84	0	2	86	16	157	0	86	chr4_1048094
chr4	1048124	1048124	12.9	12.9%_116r	chr4	1048124	CaMKII	EXON	0	101	15	0	116	0	69	0	0	69	15	116	0	69	chr4_1048124
chr4	1048144	1048144	9.8	9.8%_164r	chr4	1048144	CaMKII	EXON	1	147	16	0	164	0	93	0	0	93	16	164	0	93	chr4_1048144
chr4	1048551	1048551	15.1	15.1%_324r	chr4	1048551	CaMKII	EXON	0	275	49	0	324	0	146	0	0	146	49	324	0	146	chr4_1048551
chr4	1050301	1050301	7.5	7.5%_53r	chr4	1050301	CaMKII	EXON	0	49	4	0	53	0	31	0	0	31	4	53	0	31	chr4_1050301
chr4	1050791	1050791	13.5	13.5%_111r	chr4	1050791	CaMKII	EXON	0	96	15	0	111	0	79	0	0	79	15	111	0	79	chr4_1050791
chr4	1050841	1050841	8.1	8.1%_123r	chr4	1050841	CaMKII	EXON	0	113	10	0	123	0	69	0	0	69	10	123	0	69	chr4_1050841
chr4	1050851	1050851	14.1	14.1%_149r	chr4	1050851	CaMKII	EXON	0	128	21	0	149	0	81	0	0	81	21	149	0	81	chr4_1050851
chr4	1051050	1051050	22.2	22.2%_108r	chr4	1051050	CaMKII	EXON	0	84	24	0	108	0	104	0	0	104	24	108	0	104	chr4_1051050
chr4	1051068	1051068	11.1	11.1%_81r	chr4	1051068	CaMKII	EXON	0	72	9	0	81	0	68	0	0	68	9	81	0	68	chr4_1051068
chr4	1051170	1051170	8.1	8.1%_37r	chr4	1051170	CaMKII	EXON	0	34	3	0	37	0	21	0	0	21	3	37	0	21	chr4_1051170
chr4	1051212	1051212	6.7	6.7%_45r	chr4	1051212	CaMKII	EXON	0	42	3	0	45	0	21	0	0	21	3	45	0	21	chr4_1051212
chr4	1051217	1051217	20.8	20.8%_48r	chr4	1051217	CaMKII	EXON	0	38	10	0	48	0	26	0	0	26	10	48	0	26	chr4_1051217
chr4	1051218	1051218	17	17.0%_47r	chr4	1051218	CaMKII	EXON	0	39	8	0	47	0	27	0	0	27	8	47	0	27	chr4_1051218
chr4	1051219	1051219	38.3	38.3%_47r	chr4	1051219	CaMKII	EXON	0	29	18	0	47	0	25	0	0	25	18	47	0	25	chr4_1051219
chr4	1051220	1051220	19.1	19.1%_47r	chr4	1051220	CaMKII	EXON	0	38	9	0	47	0	25	0	0	25	9	47	0	25	chr4_1051220
chr4	1051241	1051241	29.3	29.3%_41r	chr4	1051241	CaMKII	EXON	0	29	12	0	41	0	27	0	0	27	12	41	0	27	chr4_1051241
chr4	1057447	1057447	6.2	6.2%_112r	chr4	1057447	Zyx	EXON	0	105	7	0	112	0	44	0	0	44	7	112	0	44	chr4_1057447
chr4	1057468	1057468	14.3	14.3%_98r	chr4	1057468	Zyx	EXON	0	84	14	0	98	0	39	0	0	39	14	98	0	39	chr4_1057468
chr4	1057497	1057497	6.8	6.8%_74r	chr4	1057497	Zyx	EXON	0	69	5	0	74	0	20	0	0	20	5	74	0	20	chr4_1057497
chr4	1057498	1057498	11.8	11.8%_76r	chr4	1057498	Zyx	EXON	0	67	9	0	76	0	20	0	0	20	9	76	0	20	chr4_1057498
chr4	1057504	1057504	6.9	6.9%_87r	chr4	1057504	Zyx	EXON	0	81	6	0	87	0	19	0	0	19	6	87	0	19	chr4_1057504
chr4	1057546	1057546	14.5	14.5%_110r	chr4	1057546	Zyx	EXON	0	94	16	0	110	0	34	0	0	34	16	110	0	34	chr4_1057546
chr4	1057651	1057651	11	11.0%_181r	chr4	1057651	Zyx	EXON	0	161	20	0	181	0	47	0	0	47	20	181	0	47	chr4_1057651
chr4	1057669	1057669	40.2	40.2%_132r	chr4	1057669	Zyx	EXON	0	79	53	0	132	0	44	0	0	44	53	132	0	44	chr4_1057669
chr4	1057702	1057702	12.7	12.7%_71r	chr4	1057702	Zyx	EXON	0	62	9	0	71	0	37	0	0	37	9	71	0	37	chr4_1057702
chr4	1057807	1057807	10.8	10.8%_74r	chr4	1057807	Zyx	EXON	0	66	8	0	74	0	28	0	0	28	8	74	0	28	chr4_1057807
chr4	1057876	1057876	6	6.0%_216r	chr4	1057876	Zyx	EXON	0	203	13	0	216	0	68	0	0	68	13	216	0	68	chr4_1057876
chr4	1058019	1058019	6.2	6.2%_192r	chr4	1058019	Zyx	EXON	0	180	12	0	192	0	44	0	0	44	12	192	0	44	chr4_1058019
chr4	1058026	1058026	11.8	11.8%_187r	chr4	1058026	Zyx	EXON	2	163	22	0	187	0	40	0	0	40	22	187	0	40	chr4_1058026
chr4	1058061	1058061	9.2	9.2%_174r	chr4	1058061	Zyx	EXON	0	158	16	0	174	0	39	0	0	39	16	174	0	39	chr4_1058061
chr4	1058137	1058137	9.7	9.7%_93r	chr4	1058137	Zyx	EXON	0	84	9	0	93	0	32	0	0	32	9	93	0	32	chr4_1058137
chr4	1058138	1058138	16.5	16.5%_91r	chr4	1058138	Zyx	EXON	0	76	15	0	91	0	33	0	0	33	15	91	0	33	chr4_1058138
chr4	1058153	1058153	12.5	12.5%_64r	chr4	1058153	Zyx	EXON	0	56	8	0	64	0	23	0	0	23	8	64	0	23	chr4_1058153
chr4	1058240	1058240	13.1	13.1%_107r	chr4	1058240	Zyx	EXON	0	92	14	1	107	0	27	0	0	27	14	107	0	27	chr4_1058240
chr4	1058254	1058254	24.3	24.3%_111r	chr4	1058254	Zyx	EXON	0	84	27	0	111	0	23	0	0	23	27	111	0	23	chr4_1058254
chr4	1058307	1058307	6.6	6.6%_197r	chr4	1058307	Zyx	EXON	0	184	13	0	197	0	49	0	0	49	13	197	0	49	chr4_1058307
chr4	1058315	1058315	34.4	34.4%_241r	chr4	1058315	Zyx	EXON	0	158	83	0	241	0	66	0	0	66	83	241	0	66	chr4_1058315
chr4	1058491	1058491	7	7.0%_230r	chr4	1058491	Zyx	EXON	0	214	16	0	230	0	59	0	0	59	16	230	0	59	chr4_1058491
chr4	1059117	1059117	26.1	26.1%_180r	chr4	1059117	Zyx	EXON	0	133	47	0	180	0	44	0	0	44	47	180	0	44	chr4_1059117
chr4	1059192	1059192	9.7	9.7%_113r	chr4	1059192	Zyx	EXON	0	102	11	0	113	0	39	0	0	39	11	113	0	39	chr4_1059192
chr4	1059196	1059196	6.3	6.3%_111r	chr4	1059196	Zyx	EXON	0	104	7	0	111	0	34	0	0	34	7	111	0	34	chr4_1059196
chr4	1059213	1059213	7.1	7.1%_154r	chr4	1059213	Zyx	EXON	0	142	11	1	154	0	46	0	0	46	11	154	0	46	chr4_1059213
chr4	1059314	1059314	7.7	7.7%_117r	chr4	1059314	Zyx	EXON	0	108	9	0	117	0	51	0	0	51	9	117	0	51	chr4_1059314
chr4	1059334	1059334	11.1	11.1%_153r	chr4	1059334	Zyx	EXON	0	136	17	0	153	0	57	0	0	57	17	153	0	57	chr4_1059334
chr4	1059428	1059428	6.9	6.9%_173r	chr4	1059428	Zyx	EXON	0	161	12	0	173	0	51	0	0	51	12	173	0	51	chr4_1059428
chr4	1059515	1059515	7.7	7.7%_220r	chr4	1059515	Zyx	EXON	0	203	17	0	220	0	78	0	0	78	17	220	0	78	chr4_1059515
chr4	1059531	1059531	44.1	44.1%_211r	chr4	1059531	Zyx	EXON	0	118	93	0	211	0	83	0	0	83	93	211	0	83	chr4_1059531
chr4	1059532	1059532	21.2	21.2%_208r	chr4	1059532	Zyx	EXON	0	164	44	0	208	0	80	0	0	80	44	208	0	80	chr4_1059532
chr4	1059587	1059587	8.5	8.5%_141r	chr4	1059587	Zyx	EXON	0	129	12	0	141	0	58	0	0	58	12	141	0	58	chr4_1059587
chr4	1059610	1059610	13.2	13.2%_114r	chr4	1059610	Zyx	EXON	0	99	15	0	114	0	55	0	0	55	15	114	0	55	chr4_1059610
chr4	1059704	1059704	12.2	12.2%_123r	chr4	1059704	Zyx	EXON	0	108	15	0	123	0	55	0	0	55	15	123	0	55	chr4_1059704
chr4	1059728	1059728	32	32.0%_125r	chr4	1059728	Zyx	EXON	0	84	40	1	125	0	50	0	0	50	40	125	0	50	chr4_1059728
chr4	1059769	1059769	7.1	7.1%_170r	chr4	1059769	Zyx	EXON	0	158	12	0	170	0	65	0	0	65	12	170	0	65	chr4_1059769
chr4	1059824	1059824	13.1	13.1%_130r	chr4	1059824	Zyx	EXON	0	113	17	0	130	0	50	0	0	50	17	130	0	50	chr4_1059824
chr4	1060452	1060452	8.3	8.3%_206r	chr4	1060452	Zyx	EXON	0	188	17	1	206	0	77	0	0	77	17	206	0	77	chr4_1060452
chr4	1060561	1060561	7.9	7.9%_101r	chr4	1060561	Zyx	EXON	0	93	8	0	101	0	38	0	0	38	8	101	0	38	chr4_1060561
chr4	1060580	1060580	11.6	11.6%_95r	chr4	1060580	Zyx	EXON	0	84	11	0	95	0	38	0	0	38	11	95	0	38	chr4_1060580
chr4	1060588	1060588	6.2	6.2%_64r	chr4	1060588	Zyx	EXON	0	60	4	0	64	0	31	0	0	31	4	64	0	31	chr4_1060588
chr4	1060612	1060612	18.4	18.4%_49r	chr4	1060612	Zyx	EXON	1	39	9	0	49	1	26	0	0	27	9	49	0	27	chr4_1060612
chr4	1060820	1060820	6.9	6.9%_58r	chr4	1060820	Zyx	EXON	0	54	4	0	58	0	22	0	0	22	4	58	0	22	chr4_1060820
chr4	610817	610817	6.2	6.2%_48r	chr4	610817	Eph	EXON	45	0	0	3	48	35	0	0	0	35	3	48	0	35	chr4_610817
chr4	611296	611296	8.5	8.5%_47r	chr4	611296	Eph	EXON	43	0	0	4	47	30	0	0	0	30	4	47	0	30	chr4_611296
chr4	611487	611487	6.1	6.1%_66r	chr4	611487	Eph	EXON	62	0	0	4	66	45	0	0	0	45	4	66	0	45	chr4_611487
chr4	611572	611572	13.8	13.8%_65r	chr4	611572	Eph	EXON	56	0	0	9	65	19	0	0	0	19	9	65	0	19	chr4_611572
chr4	611653	611653	30.6	30.6%_62r	chr4	611653	Eph	EXON	43	0	0	19	62	24	0	0	0	24	19	62	0	24	chr4_611653
chr4	611756	611756	6.7	6.7%_89r	chr4	611756	Eph	EXON	83	0	0	6	89	43	0	0	0	43	6	89	0	43	chr4_611756
chr4	611796	611796	6.2	6.2%_64r	chr4	611796	Eph	EXON	60	0	0	4	64	48	0	0	0	48	4	64	0	48	chr4_611796
chr4	613999	613999	10	10.0%_20r	chr4	613999	Eph	EXON	18	0	0	2	20	12	0	0	0	12	2	20	0	12	chr4_613999
chr4	614060	614060	9.1	9.1%_22r	chr4	614060	Eph	EXON	20	0	0	2	22	14	0	0	0	14	2	22	0	14	chr4_614060
chr4	615056	615056	9.1	9.1%_33r	chr4	615056	Eph	EXON	30	0	0	3	33	11	0	0	0	11	3	33	0	11	chr4_615056
chr4	615206	615206	6.1	6.1%_33r	chr4	615206	Eph	EXON	31	0	0	2	33	11	0	0	0	11	2	33	0	11	chr4_615206
chr4	615277	615277	8.3	8.3%_24r	chr4	615277	Eph	EXON	22	0	0	2	24	10	0	0	0	10	2	24	0	10	chr4_615277
chr4	615293	615293	6.7	6.7%_30r	chr4	615293	Eph	EXON	28	0	0	2	30	13	0	0	0	13	2	30	0	13	chr4_615293
chr4	615341	615341	26.4	26.4%_53r	chr4	615341	Eph	EXON	39	0	0	14	53	24	0	0	0	24	14	53	0	24	chr4_615341
chr4	615492	615492	12.5	12.5%_24r	chr4	615492	Eph	EXON	21	0	0	3	24	11	0	0	0	11	3	24	0	11	chr4_615492
chr4	615669	615669	6.9	6.9%_29r	chr4	615669	Eph	EXON	27	0	0	2	29	17	0	0	0	17	2	29	0	17	chr4_615669
chr4	615788	615788	10	10.0%_30r	chr4	615788	Eph	EXON	27	0	0	3	30	14	0	0	0	14	3	30	0	14	chr4_615788
chr4	616034	616034	8	8.0%_25r	chr4	616034	Eph	EXON	23	0	0	2	25	12	0	0	0	12	2	25	0	12	chr4_616034
chr4	616046	616046	17.9	17.9%_28r	chr4	616046	Eph	EXON	23	0	0	5	28	14	0	0	0	14	5	28	0	14	chr4_616046
chr4	616073	616073	6.1	6.1%_33r	chr4	616073	Eph	EXON	31	0	0	2	33	10	0	0	0	10	2	33	0	10	chr4_616073
chr4	616084	616084	16.7	16.7%_30r	chr4	616084	Eph	EXON	25	0	0	5	30	12	0	0	0	12	5	30	0	12	chr4_616084
chr4	618371	618371	16.7	16.7%_24r	chr4	618371	Eph	EXON	20	0	0	4	24	12	0	0	0	12	4	24	0	12	chr4_618371
chr4	618419	618419	11.1	11.1%_45r	chr4	618419	Eph	EXON	40	0	0	5	45	17	0	0	0	17	5	45	0	17	chr4_618419
chr4	618463	618463	6.2	6.2%_32r	chr4	618463	Eph	EXON	30	0	0	2	32	19	0	0	0	19	2	32	0	19	chr4_618463
chr4	618466	618466	9.7	9.7%_31r	chr4	618466	Eph	EXON	27	0	1	3	31	20	0	0	0	20	3	31	0	20	chr4_618466
chr4	618546	618546	10.3	10.3%_29r	chr4	618546	Eph	EXON	26	0	0	3	29	19	0	0	0	19	3	29	0	19	chr4_618546
chr4	618717	618717	7.7	7.7%_26r	chr4	618717	Eph	EXON	24	0	0	2	26	10	0	0	0	10	2	26	0	10	chr4_618717
chr4	618740	618740	8.3	8.3%_36r	chr4	618740	Eph	EXON	33	0	0	3	36	13	0	0	0	13	3	36	0	13	chr4_618740
chr4	618760	618760	8	8.0%_25r	chr4	618760	Eph	EXON	23	0	0	2	25	11	0	0	0	11	2	25	0	11	chr4_618760
chr4	618761	618761	7.7	7.7%_26r	chr4	618761	Eph	EXON	24	0	0	2	26	10	0	0	0	10	2	26	0	10	chr4_618761
chr4	618762	618762	11.5	11.5%_26r	chr4	618762	Eph	EXON	23	0	0	3	26	10	0	0	0	10	3	26	0	10	chr4_618762
chr4	618870	618870	10.7	10.7%_28r	chr4	618870	Eph	EXON	25	0	0	3	28	11	0	0	0	11	3	28	0	11	chr4_618870
chr4	618883	618883	6.1	6.1%_33r	chr4	618883	Eph	EXON	31	0	0	2	33	19	1	0	0	20	2	33	0	20	chr4_618883
chr4	618967	618967	8.3	8.3%_48r	chr4	618967	Eph	EXON	44	0	0	4	48	20	0	0	0	20	4	48	0	20	chr4_618967
chr4	619685	619685	9.1	9.1%_22r	chr4	619685	Eph	EXON	20	0	0	2	22	14	0	1	0	15	2	22	0	15	chr4_619685
chr4	619904	619904	7.1	7.1%_42r	chr4	619904	Eph	EXON	39	0	0	3	42	26	0	0	0	26	3	42	0	26	chr4_619904
chr4	619915	619915	8.8	8.8%_34r	chr4	619915	Eph	EXON	31	0	0	3	34	17	0	0	0	17	3	34	0	17	chr4_619915
chr4	620082	620082	9.5	9.5%_42r	chr4	620082	Eph	EXON	38	0	0	4	42	23	0	0	0	23	4	42	0	23	chr4_620082
chr4	620093	620093	8.9	8.9%_56r	chr4	620093	Eph	EXON	50	1	0	5	56	22	0	0	0	22	5	56	0	22	chr4_620093
chr4	620130	620130	27.3	27.3%_55r	chr4	620130	Eph	EXON	40	0	0	15	55	24	0	0	0	24	15	55	0	24	chr4_620130
chr4	620416	620416	15.3	15.3%_118r	chr4	620416	Eph	EXON	100	0	0	18	118	33	0	0	0	33	18	118	0	33	chr4_620416
chr4	620457	620457	9.8	9.8%_122r	chr4	620457	Eph	EXON	109	0	1	12	122	32	0	0	0	32	12	122	0	32	chr4_620457
chr4	620533	620533	25.9	25.9%_54r	chr4	620533	Eph	EXON	40	0	0	14	54	10	0	0	0	10	14	54	0	10	chr4_620533
chr4	620547	620547	10	10.0%_50r	chr4	620547	Eph	EXON	45	0	0	5	50	18	0	0	0	18	5	50	0	18	chr4_620547
chr4	620551	620551	40	40.0%_50r	chr4	620551	Eph	EXON	30	0	0	20	50	19	1	0	0	20	20	50	0	20	chr4_620551
chr4	620552	620552	62.5	62.5%_48r	chr4	620552	Eph	EXON	18	0	0	30	48	20	0	0	0	20	30	48	0	20	chr4_620552
chr4	620665	620665	37.5	37.5%_96r	chr4	620665	Eph	EXON	60	0	0	36	96	19	1	0	0	20	36	96	0	20	chr4_620665
chr4	620690	620690	6.5	6.5%_124r	chr4	620690	Eph	EXON	116	0	0	8	124	18	0	0	0	18	8	124	0	18	chr4_620690
chr4	1172482	1172482	10	10.0%_30r	chr4	1172482	pho	EXON	0	27	3	0	30	0	11	0	0	11	3	30	0	11	chr4_1172482
chr4	1172484	1172484	18.2	18.2%_33r	chr4	1172484	pho	EXON	0	27	6	0	33	0	13	0	0	13	6	33	0	13	chr4_1172484
chr4	1172653	1172653	8.8	8.8%_57r	chr4	1172653	pho	EXON	0	52	5	0	57	0	13	0	0	13	5	57	0	13	chr4_1172653
chr4	1172676	1172676	50	50.0%_52r	chr4	1172676	pho	EXON	0	26	26	0	52	0	18	0	0	18	26	52	0	18	chr4_1172676
chr4	1172697	1172697	31.6	31.6%_38r	chr4	1172697	pho	EXON	0	26	12	0	38	0	14	0	0	14	12	38	0	14	chr4_1172697
chr4	1172717	1172717	7.7	7.7%_26r	chr4	1172717	pho	EXON	0	24	2	0	26	0	13	0	0	13	2	26	0	13	chr4_1172717
chr4	1172823	1172823	70.6	70.6%_68r	chr4	1172823	pho	EXON	0	20	48	0	68	0	34	0	0	34	48	68	0	34	chr4_1172823
chr4	1172857	1172857	21.4	21.4%_70r	chr4	1172857	pho	EXON	0	55	15	0	70	0	36	0	0	36	15	70	0	36	chr4_1172857
chr4	1172889	1172889	6.1	6.1%_114r	chr4	1172889	pho	EXON	0	107	7	0	114	0	56	0	0	56	7	114	0	56	chr4_1172889
chr4	1172895	1172895	6.7	6.7%_135r	chr4	1172895	pho	EXON	0	126	9	0	135	0	60	0	0	60	9	135	0	60	chr4_1172895
chr4	1172921	1172921	7.3	7.3%_150r	chr4	1172921	pho	EXON	0	138	11	1	150	0	71	0	0	71	11	150	0	71	chr4_1172921
chr4	1172978	1172978	18.1	18.1%_72r	chr4	1172978	pho	EXON	0	59	13	0	72	0	31	0	0	31	13	72	0	31	chr4_1172978
chr4	1172980	1172980	15.1	15.1%_73r	chr4	1172980	pho	EXON	0	62	11	0	73	0	32	0	0	32	11	73	0	32	chr4_1172980
chr4	1172981	1172981	6.5	6.5%_77r	chr4	1172981	pho	EXON	0	72	5	0	77	0	35	0	0	35	5	77	0	35	chr4_1172981
chr4	1173944	1173944	9	9.0%_78r	chr4	1173944	pho	EXON	0	71	7	0	78	0	42	0	0	42	7	78	0	42	chr4_1173944
chr4	1173996	1173996	8	8.0%_113r	chr4	1173996	pho	EXON	0	104	9	0	113	0	54	0	0	54	9	113	0	54	chr4_1173996
chr4	1174059	1174059	9.7	9.7%_93r	chr4	1174059	pho	EXON	0	84	9	0	93	1	58	0	0	59	9	93	0	59	chr4_1174059
chr4	1174063	1174063	7.8	7.8%_77r	chr4	1174063	pho	EXON	0	71	6	0	77	0	51	0	0	51	6	77	0	51	chr4_1174063
chr4	1174073	1174073	7.7	7.7%_65r	chr4	1174073	pho	EXON	0	60	5	0	65	0	40	0	0	40	5	65	0	40	chr4_1174073
chr4	1174160	1174160	7.8	7.8%_90r	chr4	1174160	pho	EXON	0	83	7	0	90	1	40	0	0	41	7	90	0	41	chr4_1174160
chr4	1174211	1174211	7.9	7.9%_63r	chr4	1174211	pho	EXON	1	57	5	0	63	0	32	0	0	32	5	63	0	32	chr4_1174211
chr4	1174337	1174337	13.3	13.3%_45r	chr4	1174337	pho	EXON	0	39	6	0	45	0	35	0	0	35	6	45	0	35	chr4_1174337
chr4	1174376	1174376	33.3	33.3%_45r	chr4	1174376	pho	EXON	0	30	15	0	45	0	46	0	0	46	15	45	0	46	chr4_1174376
chr4	1174438	1174438	8.1	8.1%_74r	chr4	1174438	pho	EXON	1	67	6	0	74	0	30	0	0	30	6	74	0	30	chr4_1174438
chr4	1174470	1174470	6.5	6.5%_107r	chr4	1174470	pho	EXON	0	100	7	0	107	0	63	0	0	63	7	107	0	63	chr4_1174470
chr4	1174726	1174726	14.3	14.3%_77r	chr4	1174726	pho	EXON	0	66	11	0	77	1	36	0	0	37	11	77	0	37	chr4_1174726
chr4	1174783	1174783	38.2	38.2%_89r	chr4	1174783	pho	EXON	2	53	34	0	89	0	40	0	0	40	34	89	0	40	chr4_1174783
chr4	1174869	1174869	22.5	22.5%_40r	chr4	1174869	pho	EXON	0	31	9	0	40	0	16	0	0	16	9	40	0	16	chr4_1174869
chr4	1181082	1181082	8.9	8.9%_90r	chr4	1181082	pho	EXON	0	81	8	1	90	0	49	0	0	49	8	90	0	49	chr4_1181082
chr4	1181088	1181088	7	7.0%_86r	chr4	1181088	pho	EXON	0	80	6	0	86	0	39	0	0	39	6	86	0	39	chr4_1181088
chr4	1181279	1181279	27.7	27.7%_65r	chr4	1181279	pho	EXON	0	47	18	0	65	0	41	0	0	41	18	65	0	41	chr4_1181279
chr4	1181391	1181391	9.3	9.3%_43r	chr4	1181391	pho	EXON	0	39	4	0	43	0	18	0	0	18	4	43	0	18	chr4_1181391
chr4	1181418	1181418	16.7	16.7%_42r	chr4	1181418	pho	EXON	0	35	7	0	42	0	15	0	0	15	7	42	0	15	chr4_1181418
chr4	1181437	1181437	6.7	6.7%_30r	chr4	1181437	pho	EXON	0	28	2	0	30	0	11	0	0	11	2	30	0	11	chr4_1181437
chr4	680994	680994	8.3	8.3%_24r	chr4	680994	CG11360	EXON	22	0	0	2	24	10	0	0	0	10	2	24	0	10	chr4_680994
chr4	681005	681005	11.1	11.1%_27r	chr4	681005	CG11360	EXON	24	0	0	3	27	17	0	0	0	17	3	27	0	17	chr4_681005
chr4	684841	684841	9.1	9.1%_22r	chr4	684841	CG11360	EXON	20	0	0	2	22	12	0	0	0	12	2	22	0	12	chr4_684841
chr4	685216	685216	8	8.0%_25r	chr4	685216	CG11360	EXON	23	0	0	2	25	11	0	0	0	11	2	25	0	11	chr4_685216
chr4	690586	690586	39.1	39.1%_23r	chr4	690586	CG11360	EXON	14	0	0	9	23	10	1	0	0	11	9	23	0	11	chr4_690586
chr4	65403	65403	9.3	9.3%_43r	chr4	65403	RpS3A	EXON	0	39	4	0	43	0	15	0	0	15	4	43	0	15	chr4_65403
chr4	65444	65444	12	12.0%_133r	chr4	65444	RpS3A	EXON	0	117	16	0	133	0	47	0	0	47	16	133	0	47	chr4_65444
chr4	65492	65492	10.7	10.7%_131r	chr4	65492	RpS3A	EXON	0	115	14	2	131	0	70	0	0	70	14	131	0	70	chr4_65492
chr4	66021	66021	7.8	7.8%_102r	chr4	66021	RpS3A	EXON	0	94	8	0	102	0	47	0	0	47	8	102	0	47	chr4_66021
chr4	66175	66175	26.1	26.1%_142r	chr4	66175	RpS3A	EXON	0	105	37	0	142	0	66	0	0	66	37	142	0	66	chr4_66175
chr4	66180	66180	6	6.0%_150r	chr4	66180	RpS3A	EXON	0	141	9	0	150	0	73	0	0	73	9	150	0	73	chr4_66180
chr4	66222	66222	39.2	39.2%_1879r	chr4	66222	RpS3A	EXON	1	1139	737	1	1879	0	1074	0	0	1074	737	1879	0	1074	chr4_66222
chr4	66246	66246	43.4	43.4%_2715r	chr4	66246	RpS3A	EXON	1	1536	1178	0	2715	0	1537	1	0	1538	1178	2715	1	1538	chr4_66246
chr4	66526	66526	26.6	26.6%_4169r	chr4	66526	RpS3A	EXON	0	3059	1110	0	4169	0	2655	0	1	2656	1110	4169	0	2656	chr4_66526
chr4	66644	66644	7.1	7.1%_4398r	chr4	66644	RpS3A	EXON	0	4082	314	2	4398	3	2761	0	1	2765	314	4398	0	2765	chr4_66644
chr4	66905	66905	35.1	35.1%_4099r	chr4	66905	RpS3A	EXON	4	2657	1437	1	4099	0	2611	0	0	2611	1437	4099	0	2611	chr4_66905
chr4	66957	66957	6.4	6.4%_3372r	chr4	66957	RpS3A	EXON	1	3152	217	2	3372	0	2174	0	0	2175	217	3372	0	2175	chr4_66957
chr4	66968	66968	8.1	8.1%_3222r	chr4	66968	RpS3A	EXON	14	2948	260	0	3222	4	2217	0	0	2221	260	3222	0	2221	chr4_66968
chr4	67051	67051	7.8	7.8%_2964r	chr4	67051	RpS3A	EXON	4	2726	231	3	2964	1	1798	1	1	1801	231	2964	1	1801	chr4_67051
chr4	67122	67122	8.2	8.2%_3323r	chr4	67122	RpS3A	EXON	3	3046	274	0	3323	1	2064	0	1	2066	274	3323	0	2066	chr4_67122
chr4	459991	459991	6.7	6.7%_105r	chr4	459991	bip2	EXON	0	98	7	0	105	0	35	0	0	35	7	105	0	35	chr4_459991
chr4	460020	460020	6.8	6.8%_44r	chr4	460020	bip2	EXON	0	40	3	1	44	0	21	0	0	21	3	44	0	21	chr4_460020
chr4	460106	460106	9.1	9.1%_55r	chr4	460106	bip2	EXON	0	50	5	0	55	0	17	0	0	17	5	55	0	17	chr4_460106
chr4	460244	460244	7.1	7.1%_85r	chr4	460244	bip2	EXON	0	79	6	0	85	0	34	0	0	34	6	85	0	34	chr4_460244
chr4	460260	460260	10.6	10.6%_66r	chr4	460260	bip2	EXON	0	58	7	1	66	0	27	0	0	27	7	66	0	27	chr4_460260
chr4	460261	460261	7.8	7.8%_77r	chr4	460261	bip2	EXON	0	71	6	0	77	0	30	0	0	30	6	77	0	30	chr4_460261
chr4	460310	460310	22.7	22.7%_88r	chr4	460310	bip2	EXON	0	68	20	0	88	0	29	0	0	29	20	88	0	29	chr4_460310
chr4	460324	460324	9.6	9.6%_73r	chr4	460324	bip2	EXON	1	65	7	0	73	0	25	0	0	25	7	73	0	25	chr4_460324
chr4	460393	460393	8.7	8.7%_103r	chr4	460393	bip2	EXON	0	94	9	0	103	0	41	0	0	41	9	103	0	41	chr4_460393
chr4	460394	460394	8.9	8.9%_112r	chr4	460394	bip2	EXON	0	102	10	0	112	0	45	0	0	45	10	112	0	45	chr4_460394
chr4	460405	460405	6.9	6.9%_131r	chr4	460405	bip2	EXON	0	122	9	0	131	0	50	0	0	50	9	131	0	50	chr4_460405
chr4	460414	460414	6.5	6.5%_108r	chr4	460414	bip2	EXON	0	101	7	0	108	0	39	0	0	39	7	108	0	39	chr4_460414
chr4	460437	460437	8.8	8.8%_114r	chr4	460437	bip2	EXON	0	104	10	0	114	0	37	0	0	37	10	114	0	37	chr4_460437
chr4	460438	460438	31.6	31.6%_98r	chr4	460438	bip2	EXON	1	66	31	0	98	0	33	0	0	33	31	98	0	33	chr4_460438
chr4	460441	460441	21.2	21.2%_104r	chr4	460441	bip2	EXON	0	81	22	1	104	0	35	0	0	35	22	104	0	35	chr4_460441
chr4	460444	460444	7.1	7.1%_98r	chr4	460444	bip2	EXON	0	91	7	0	98	0	35	0	0	35	7	98	0	35	chr4_460444
chr4	460478	460478	46.9	46.9%_64r	chr4	460478	bip2	EXON	0	34	30	0	64	0	23	0	0	23	30	64	0	23	chr4_460478
chr4	460492	460492	30.7	30.7%_75r	chr4	460492	bip2	EXON	0	52	23	0	75	0	23	0	0	23	23	75	0	23	chr4_460492
chr4	460580	460580	10.5	10.5%_76r	chr4	460580	bip2	EXON	0	68	8	0	76	0	20	0	0	20	8	76	0	20	chr4_460580
chr4	460635	460635	6.1	6.1%_49r	chr4	460635	bip2	EXON	0	46	3	0	49	0	23	0	0	23	3	49	0	23	chr4_460635
chr4	460738	460738	32.9	32.9%_79r	chr4	460738	bip2	EXON	0	53	26	0	79	0	19	0	0	19	26	79	0	19	chr4_460738
chr4	460764	460764	35.4	35.4%_48r	chr4	460764	bip2	EXON	0	31	17	0	48	0	20	0	0	20	17	48	0	20	chr4_460764
chr4	460816	460816	42.9	42.9%_42r	chr4	460816	bip2	EXON	0	23	18	1	42	0	11	0	0	11	18	42	0	11	chr4_460816
chr4	460817	460817	13	13.0%_46r	chr4	460817	bip2	EXON	0	40	6	0	46	0	11	0	0	11	6	46	0	11	chr4_460817
chr4	460826	460826	6.7	6.7%_45r	chr4	460826	bip2	EXON	0	42	3	0	45	0	14	0	0	14	3	45	0	14	chr4_460826
chr4	460832	460832	18.4	18.4%_49r	chr4	460832	bip2	EXON	0	40	9	0	49	0	13	0	0	13	9	49	0	13	chr4_460832
chr4	460870	460870	29.2	29.2%_48r	chr4	460870	bip2	EXON	0	34	14	0	48	0	15	0	0	15	14	48	0	15	chr4_460870
chr4	460911	460911	7.8	7.8%_51r	chr4	460911	bip2	EXON	0	47	4	0	51	0	10	0	0	10	4	51	0	10	chr4_460911
chr4	460940	460940	40.7	40.7%_54r	chr4	460940	bip2	EXON	0	32	22	0	54	0	18	0	0	18	22	54	0	18	chr4_460940
chr4	460952	460952	18.6	18.6%_43r	chr4	460952	bip2	EXON	0	35	8	0	43	0	15	0	0	15	8	43	0	15	chr4_460952
chr4	460966	460966	61.4	61.4%_44r	chr4	460966	bip2	EXON	0	17	27	0	44	0	11	0	0	11	27	44	0	11	chr4_460966
chr4	460967	460967	9.1	9.1%_44r	chr4	460967	bip2	EXON	0	40	4	0	44	0	11	0	0	11	4	44	0	11	chr4_460967
chr4	461018	461018	31.7	31.7%_82r	chr4	461018	bip2	EXON	0	56	26	0	82	0	20	0	0	20	26	82	0	20	chr4_461018
chr4	461023	461023	10.2	10.2%_88r	chr4	461023	bip2	EXON	0	79	9	0	88	0	20	0	0	20	9	88	0	20	chr4_461023
chr4	461733	461733	7.4	7.4%_27r	chr4	461733	bip2	EXON	0	25	2	0	27	0	23	0	0	23	2	27	0	23	chr4_461733
chr4	461759	461759	9.1	9.1%_22r	chr4	461759	bip2	EXON	0	20	2	0	22	0	16	0	0	16	2	22	0	16	chr4_461759
chr4	461823	461823	8.8	8.8%_34r	chr4	461823	bip2	EXON	0	31	3	0	34	0	22	0	0	22	3	34	0	22	chr4_461823
chr4	461836	461836	8.8	8.8%_34r	chr4	461836	bip2	EXON	0	31	3	0	34	0	28	0	0	28	3	34	0	28	chr4_461836
chr4	461886	461886	9.5	9.5%_21r	chr4	461886	bip2	EXON	0	19	2	0	21	0	14	0	0	14	2	21	0	14	chr4_461886
chr4	461909	461909	11.1	11.1%_27r	chr4	461909	bip2	EXON	0	24	3	0	27	0	11	0	0	11	3	27	0	11	chr4_461909
chr4	461940	461940	7.7	7.7%_26r	chr4	461940	bip2	EXON	0	24	2	0	26	0	13	0	0	13	2	26	0	13	chr4_461940
chr4	461973	461973	20	20.0%_20r	chr4	461973	bip2	EXON	0	16	4	0	20	0	13	0	0	13	4	20	0	13	chr4_461973
chr4	462068	462068	6.7	6.7%_30r	chr4	462068	bip2	EXON	0	28	2	0	30	0	27	0	0	27	2	30	0	27	chr4_462068
chr4	462095	462095	50	50.0%_30r	chr4	462095	bip2	EXON	0	15	15	0	30	0	20	0	0	20	15	30	0	20	chr4_462095
chr4	462117	462117	6.7	6.7%_30r	chr4	462117	bip2	EXON	0	28	2	0	30	0	28	0	0	28	2	30	0	28	chr4_462117
chr4	462188	462188	17.6	17.6%_34r	chr4	462188	bip2	EXON	0	28	6	0	34	0	28	0	0	28	6	34	0	28	chr4_462188
chr4	462189	462189	9.1	9.1%_33r	chr4	462189	bip2	EXON	0	30	3	0	33	0	25	0	0	25	3	33	0	25	chr4_462189
chr4	462192	462192	8.8	8.8%_34r	chr4	462192	bip2	EXON	0	31	3	0	34	0	25	0	0	25	3	34	0	25	chr4_462192
chr4	462207	462207	9.1	9.1%_33r	chr4	462207	bip2	EXON	0	30	3	0	33	0	22	0	0	22	3	33	0	22	chr4_462207
chr4	462218	462218	8.3	8.3%_36r	chr4	462218	bip2	EXON	0	33	3	0	36	0	23	0	0	23	3	36	0	23	chr4_462218
chr4	462255	462255	7.4	7.4%_27r	chr4	462255	bip2	EXON	0	25	2	0	27	0	14	0	0	14	2	27	0	14	chr4_462255
chr4	462272	462272	9.4	9.4%_32r	chr4	462272	bip2	EXON	0	29	3	0	32	0	25	0	0	25	3	32	0	25	chr4_462272
chr4	462408	462408	11.4	11.4%_35r	chr4	462408	bip2	EXON	0	31	4	0	35	0	20	0	0	20	4	35	0	20	chr4_462408
chr4	462413	462413	13.5	13.5%_37r	chr4	462413	bip2	EXON	0	32	5	0	37	0	22	0	0	22	5	37	0	22	chr4_462413
chr4	462416	462416	18.8	18.8%_32r	chr4	462416	bip2	EXON	0	26	6	0	32	0	24	0	0	24	6	32	0	24	chr4_462416
chr4	462449	462449	19	19.0%_21r	chr4	462449	bip2	EXON	0	17	4	0	21	0	13	0	0	13	4	21	0	13	chr4_462449
chr4	462460	462460	8.7	8.7%_23r	chr4	462460	bip2	EXON	0	21	2	0	23	0	14	0	0	14	2	23	0	14	chr4_462460
chr4	463104	463104	11.8	11.8%_34r	chr4	463104	bip2	EXON	0	30	4	0	34	0	35	0	0	35	4	34	0	35	chr4_463104
chr4	463205	463205	7.4	7.4%_27r	chr4	463205	bip2	EXON	0	25	2	0	27	0	17	0	0	17	2	27	0	17	chr4_463205
chr4	463352	463352	9.1	9.1%_33r	chr4	463352	bip2	EXON	0	30	3	0	33	0	21	0	0	21	3	33	0	21	chr4_463352
chr4	463566	463566	7.1	7.1%_56r	chr4	463566	bip2	EXON	0	52	4	0	56	0	19	0	0	19	4	56	0	19	chr4_463566
chr4	463787	463787	6.7	6.7%_45r	chr4	463787	bip2	EXON	0	42	3	0	45	0	21	0	0	21	3	45	0	21	chr4_463787
chr4	463895	463895	18.4	18.4%_49r	chr4	463895	bip2	EXON	0	40	9	0	49	0	27	0	0	27	9	49	0	27	chr4_463895
chr4	463992	463992	8.3	8.3%_24r	chr4	463992	bip2	EXON	0	22	2	0	24	0	18	0	0	18	2	24	0	18	chr4_463992
chr4	464028	464028	10.7	10.7%_28r	chr4	464028	bip2	EXON	0	25	3	0	28	1	13	0	0	14	3	28	0	14	chr4_464028
chr4	464034	464034	6.1	6.1%_33r	chr4	464034	bip2	EXON	0	31	2	0	33	0	17	0	0	17	2	33	0	17	chr4_464034
chr4	464096	464096	25.8	25.8%_31r	chr4	464096	bip2	EXON	0	23	8	0	31	0	15	0	0	15	8	31	0	15	chr4_464096
chr4	464097	464097	9.7	9.7%_31r	chr4	464097	bip2	EXON	0	28	3	0	31	0	15	0	0	15	3	31	0	15	chr4_464097
chr4	464115	464115	7	7.0%_43r	chr4	464115	bip2	EXON	0	40	3	0	43	0	19	0	0	19	3	43	0	19	chr4_464115
chr4	464169	464169	8.1	8.1%_37r	chr4	464169	bip2	EXON	0	34	3	0	37	0	17	0	0	17	3	37	0	17	chr4_464169
chr4	464430	464430	13.3	13.3%_75r	chr4	464430	bip2	EXON	0	65	10	0	75	0	27	0	0	27	10	75	0	27	chr4_464430
chr4	464432	464432	6.2	6.2%_80r	chr4	464432	bip2	EXON	1	74	5	0	80	0	29	0	0	29	5	80	0	29	chr4_464432
chr4	464448	464448	8.1	8.1%_86r	chr4	464448	bip2	EXON	0	79	7	0	86	0	35	0	0	35	7	86	0	35	chr4_464448
chr4	464550	464550	13.9	13.9%_237r	chr4	464550	bip2	EXON	0	204	33	0	237	0	105	0	0	105	33	237	0	105	chr4_464550
chr4	464583	464583	9	9.0%_188r	chr4	464583	bip2	EXON	0	171	17	0	188	0	106	0	0	106	17	188	0	106	chr4_464583
chr4	464810	464810	9.2	9.2%_196r	chr4	464810	bip2	EXON	0	178	18	0	196	0	74	0	0	74	18	196	0	74	chr4_464810
chr4	465014	465014	11	11.0%_127r	chr4	465014	bip2	EXON	0	113	14	0	127	0	53	0	0	53	14	127	0	53	chr4_465014
chr4	465114	465114	8.5	8.5%_236r	chr4	465114	bip2	EXON	1	215	20	0	236	0	105	0	0	105	20	236	0	105	chr4_465114
chr4	465128	465128	8	8.0%_176r	chr4	465128	bip2	EXON	0	162	14	0	176	0	73	0	0	73	14	176	0	73	chr4_465128
chr4	465167	465167	22.5	22.5%_142r	chr4	465167	bip2	EXON	0	110	32	0	142	0	54	0	0	54	32	142	0	54	chr4_465167
chr4	465305	465305	8.3	8.3%_145r	chr4	465305	bip2	EXON	0	133	12	0	145	0	63	0	0	63	12	145	0	63	chr4_465305
chr4	466646	466646	15.7	15.7%_115r	chr4	466646	bip2	EXON	0	97	18	0	115	0	45	0	0	45	18	115	0	45	chr4_466646
chr4	466661	466661	10.4	10.4%_115r	chr4	466661	bip2	EXON	0	103	12	0	115	0	46	0	0	46	12	115	0	46	chr4_466661
chr4	466693	466693	12.6	12.6%_127r	chr4	466693	bip2	EXON	0	111	16	0	127	0	57	0	0	57	16	127	0	57	chr4_466693
chr4	466695	466695	12.5	12.5%_128r	chr4	466695	bip2	EXON	0	112	16	0	128	0	57	0	0	57	16	128	0	57	chr4_466695
chr4	466716	466716	8.3	8.3%_132r	chr4	466716	bip2	EXON	0	121	11	0	132	0	60	0	0	60	11	132	0	60	chr4_466716
chr4	184094	184094	7.1	7.1%_28r	chr4	184094	CG2316	EXON	0	26	2	0	28	0	10	0	0	10	2	28	0	10	chr4_184094
chr4	184337	184337	11.5	11.5%_52r	chr4	184337	CG2316	EXON	0	46	6	0	52	0	16	0	0	16	6	52	0	16	chr4_184337
chr4	184356	184356	10.5	10.5%_57r	chr4	184356	CG2316	EXON	0	51	6	0	57	0	21	0	0	21	6	57	0	21	chr4_184356
chr4	184365	184365	20	20.0%_65r	chr4	184365	CG2316	EXON	0	52	13	0	65	0	29	0	0	29	13	65	0	29	chr4_184365
chr4	184383	184383	8.3	8.3%_48r	chr4	184383	CG2316	EXON	0	44	4	0	48	0	19	0	0	19	4	48	0	19	chr4_184383
chr4	184390	184390	8	8.0%_50r	chr4	184390	CG2316	EXON	1	45	4	0	50	0	18	0	0	18	4	50	0	18	chr4_184390
chr4	184391	184391	8.2	8.2%_49r	chr4	184391	CG2316	EXON	0	45	4	0	49	0	18	0	0	18	4	49	0	18	chr4_184391
chr4	184403	184403	9.8	9.8%_41r	chr4	184403	CG2316	EXON	0	37	4	0	41	0	24	0	0	24	4	41	0	24	chr4_184403
chr4	184404	184404	8.5	8.5%_47r	chr4	184404	CG2316	EXON	0	43	4	0	47	0	25	0	0	25	4	47	0	25	chr4_184404
chr4	184406	184406	28.3	28.3%_46r	chr4	184406	CG2316	EXON	0	33	13	0	46	0	25	0	0	25	13	46	0	25	chr4_184406
chr4	184448	184448	24.2	24.2%_190r	chr4	184448	CG2316	EXON	1	143	46	0	190	0	62	0	0	62	46	190	0	62	chr4_184448
chr4	184449	184449	6.3	6.3%_189r	chr4	184449	CG2316	EXON	1	176	12	0	189	0	63	0	0	63	12	189	0	63	chr4_184449
chr4	184481	184481	8	8.0%_113r	chr4	184481	CG2316	EXON	0	104	9	0	113	0	57	0	0	57	9	113	0	57	chr4_184481
chr4	184483	184483	17.4	17.4%_109r	chr4	184483	CG2316	EXON	0	90	19	0	109	0	54	0	0	54	19	109	0	54	chr4_184483
chr4	184509	184509	10.2	10.2%_49r	chr4	184509	CG2316	EXON	0	44	5	0	49	0	40	0	0	40	5	49	0	40	chr4_184509
chr4	184511	184511	8	8.0%_50r	chr4	184511	CG2316	EXON	0	46	4	0	50	0	41	0	0	41	4	50	0	41	chr4_184511
chr4	184562	184562	16.7	16.7%_60r	chr4	184562	CG2316	EXON	1	49	10	0	60	0	23	0	0	23	10	60	0	23	chr4_184562
chr4	184727	184727	11.8	11.8%_102r	chr4	184727	CG2316	EXON	0	90	12	0	102	0	48	0	0	48	12	102	0	48	chr4_184727
chr4	184730	184730	41.3	41.3%_104r	chr4	184730	CG2316	EXON	0	61	43	0	104	0	48	0	0	48	43	104	0	48	chr4_184730
chr4	184740	184740	9.1	9.1%_99r	chr4	184740	CG2316	EXON	0	90	9	0	99	0	45	0	0	45	9	99	0	45	chr4_184740
chr4	184759	184759	54.7	54.7%_150r	chr4	184759	CG2316	EXON	0	68	82	0	150	0	80	0	0	80	82	150	0	80	chr4_184759
chr4	184787	184787	24.8	24.8%_149r	chr4	184787	CG2316	EXON	0	112	37	0	149	0	66	0	0	66	37	149	0	66	chr4_184787
chr4	185859	185859	15.4	15.4%_104r	chr4	185859	CG2316	EXON	0	88	16	0	104	0	38	0	0	38	16	104	0	38	chr4_185859
chr4	186044	186044	31	31.0%_100r	chr4	186044	CG2316	EXON	0	69	31	0	100	0	46	0	0	46	31	100	0	46	chr4_186044
chr4	186118	186118	12.7	12.7%_134r	chr4	186118	CG2316	EXON	0	117	17	0	134	0	59	0	0	59	17	134	0	59	chr4_186118
chr4	186178	186178	8	8.0%_137r	chr4	186178	CG2316	EXON	0	126	11	0	137	0	67	0	0	67	11	137	0	67	chr4_186178
chr4	186182	186182	7.2	7.2%_153r	chr4	186182	CG2316	EXON	0	142	11	0	153	0	74	0	0	74	11	153	0	74	chr4_186182
chr4	186339	186339	18.8	18.8%_101r	chr4	186339	CG2316	EXON	0	82	19	0	101	0	42	0	0	42	19	101	0	42	chr4_186339
chr4	186452	186452	9.3	9.3%_107r	chr4	186452	CG2316	EXON	0	97	10	0	107	0	49	0	0	49	10	107	0	49	chr4_186452
chr4	186515	186515	15.3	15.3%_98r	chr4	186515	CG2316	EXON	0	83	15	0	98	0	50	0	0	50	15	98	0	50	chr4_186515
chr4	186539	186539	16.7	16.7%_78r	chr4	186539	CG2316	EXON	0	65	13	0	78	0	39	0	0	39	13	78	0	39	chr4_186539
chr4	186571	186571	21.7	21.7%_83r	chr4	186571	CG2316	EXON	0	65	18	0	83	0	23	0	0	23	18	83	0	23	chr4_186571
chr4	186600	186600	47.2	47.2%_106r	chr4	186600	CG2316	EXON	1	55	50	0	106	0	39	0	0	39	50	106	0	39	chr4_186600
chr4	186619	186619	8.5	8.5%_106r	chr4	186619	CG2316	EXON	0	97	9	0	106	0	31	0	0	31	9	106	0	31	chr4_186619
chr4	186624	186624	24.6	24.6%_114r	chr4	186624	CG2316	EXON	0	86	28	0	114	0	31	0	0	31	28	114	0	31	chr4_186624
chr4	186670	186670	6.7	6.7%_105r	chr4	186670	CG2316	EXON	0	97	7	1	105	0	35	0	0	35	7	105	0	35	chr4_186670
chr4	186690	186690	13.9	13.9%_108r	chr4	186690	CG2316	EXON	0	93	15	0	108	0	38	0	0	38	15	108	0	38	chr4_186690
chr4	186711	186711	8.7	8.7%_104r	chr4	186711	CG2316	EXON	0	95	9	0	104	0	44	0	0	44	9	104	0	44	chr4_186711
chr4	186786	186786	12.3	12.3%_73r	chr4	186786	CG2316	EXON	0	64	9	0	73	0	26	0	0	26	9	73	0	26	chr4_186786
chr4	186818	186818	13.8	13.8%_87r	chr4	186818	CG2316	EXON	0	75	12	0	87	0	18	0	0	18	12	87	0	18	chr4_186818
chr4	188081	188081	20.4	20.4%_103r	chr4	188081	CG2316	EXON	0	82	21	0	103	0	35	0	0	35	21	103	0	35	chr4_188081
chr4	188306	188306	22.5	22.5%_111r	chr4	188306	CG2316	EXON	0	85	25	1	111	0	50	0	0	50	25	111	0	50	chr4_188306
chr4	188365	188365	17.8	17.8%_73r	chr4	188365	CG2316	EXON	0	60	13	0	73	0	34	0	0	34	13	73	0	34	chr4_188365
chr4	188426	188426	6.7	6.7%_60r	chr4	188426	CG2316	EXON	0	56	4	0	60	0	31	0	0	31	4	60	0	31	chr4_188426
chr4	188491	188491	37	37.0%_92r	chr4	188491	CG2316	EXON	0	58	34	0	92	0	28	0	0	28	34	92	0	28	chr4_188491
chr4	188600	188600	19.8	19.8%_81r	chr4	188600	CG2316	EXON	0	65	16	0	81	1	26	0	0	27	16	81	0	27	chr4_188600
chr4	188683	188683	10.7	10.7%_112r	chr4	188683	CG2316	EXON	0	100	12	0	112	0	48	0	0	48	12	112	0	48	chr4_188683
chr4	188784	188784	12.4	12.4%_113r	chr4	188784	CG2316	EXON	0	99	14	0	113	0	57	0	0	57	14	113	0	57	chr4_188784
chr4	188812	188812	11.9	11.9%_84r	chr4	188812	CG2316	EXON	0	74	10	0	84	0	40	0	0	40	10	84	0	40	chr4_188812
chr4	188880	188880	8	8.0%_88r	chr4	188880	CG2316	EXON	0	81	7	0	88	0	28	0	0	28	7	88	0	28	chr4_188880
chr4	188891	188891	11.7	11.7%_60r	chr4	188891	CG2316	EXON	2	51	7	0	60	0	17	0	0	17	7	60	0	17	chr4_188891
chr4	188903	188903	29.1	29.1%_55r	chr4	188903	CG2316	EXON	0	39	16	0	55	0	18	0	0	18	16	55	0	18	chr4_188903
chr4	188926	188926	30.3	30.3%_66r	chr4	188926	CG2316	EXON	0	46	20	0	66	0	25	0	0	25	20	66	0	25	chr4_188926
chr4	188969	188969	10.3	10.3%_58r	chr4	188969	CG2316	EXON	0	52	6	0	58	0	23	0	0	23	6	58	0	23	chr4_188969
chr4	188972	188972	19	19.0%_63r	chr4	188972	CG2316	EXON	0	51	12	0	63	0	26	0	0	26	12	63	0	26	chr4_188972
chr4	189168	189168	26.5	26.5%_83r	chr4	189168	CG2316	EXON	1	60	22	0	83	0	21	0	0	21	22	83	0	21	chr4_189168
chr4	691745	691745	6.2	6.2%_32r	chr4	691745	myo	EXON	0	30	2	0	32	0	14	0	0	14	2	32	0	14	chr4_691745
chr4	691857	691857	16	16.0%_25r	chr4	691857	myo	EXON	0	21	4	0	25	0	12	0	0	12	4	25	0	12	chr4_691857
chr4	691899	691899	17.1	17.1%_41r	chr4	691899	myo	EXON	1	33	7	0	41	0	19	0	0	19	7	41	0	19	chr4_691899
chr4	691902	691902	14.9	14.9%_47r	chr4	691902	myo	EXON	0	40	7	0	47	0	20	0	0	20	7	47	0	20	chr4_691902
chr4	692029	692029	7.6	7.6%_66r	chr4	692029	myo	EXON	0	61	5	0	66	0	35	0	0	35	5	66	0	35	chr4_692029
chr4	692132	692132	9.2	9.2%_76r	chr4	692132	myo	EXON	0	69	7	0	76	0	51	0	0	51	7	76	0	51	chr4_692132
chr4	692250	692250	8.6	8.6%_81r	chr4	692250	myo	EXON	0	74	7	0	81	0	35	0	0	35	7	81	0	35	chr4_692250
chr4	692304	692304	12.6	12.6%_182r	chr4	692304	myo	EXON	0	159	23	0	182	0	78	0	0	78	23	182	0	78	chr4_692304
chr4	692479	692479	9.7	9.7%_72r	chr4	692479	myo	EXON	0	65	7	0	72	0	40	0	0	40	7	72	0	40	chr4_692479
chr4	692482	692482	8.7	8.7%_69r	chr4	692482	myo	EXON	0	63	6	0	69	0	35	0	1	36	6	69	0	36	chr4_692482
chr4	692572	692572	12.5	12.5%_80r	chr4	692572	myo	EXON	0	69	10	1	80	0	56	0	0	56	10	80	0	56	chr4_692572
chr4	692610	692610	7.8	7.8%_77r	chr4	692610	myo	EXON	0	71	6	0	77	0	40	0	0	40	6	77	0	40	chr4_692610
chr4	692669	692669	7.7	7.7%_117r	chr4	692669	myo	EXON	0	108	9	0	117	0	49	0	0	49	9	117	0	49	chr4_692669
chr4	693729	693729	8.8	8.8%_57r	chr4	693729	myo	EXON	0	52	5	0	57	0	23	0	0	23	5	57	0	23	chr4_693729
chr4	693730	693730	10.7	10.7%_56r	chr4	693730	myo	EXON	0	50	6	0	56	0	23	0	0	23	6	56	0	23	chr4_693730
chr4	693781	693781	6.1	6.1%_66r	chr4	693781	myo	EXON	0	62	4	0	66	0	40	0	0	40	4	66	0	40	chr4_693781
chr4	693829	693829	15.8	15.8%_76r	chr4	693829	myo	EXON	0	64	12	0	76	0	36	0	0	36	12	76	0	36	chr4_693829
chr4	693890	693890	7.5	7.5%_40r	chr4	693890	myo	EXON	0	37	3	0	40	0	29	0	0	29	3	40	0	29	chr4_693890
chr4	694182	694182	6.3	6.3%_95r	chr4	694182	myo	EXON	0	89	6	0	95	0	26	0	0	26	6	95	0	26	chr4_694182
chr4	694249	694249	7	7.0%_71r	chr4	694249	myo	EXON	0	66	5	0	71	0	41	0	0	41	5	71	0	41	chr4_694249
chr4	694352	694352	6.2	6.2%_97r	chr4	694352	myo	EXON	0	91	6	0	97	0	41	0	0	41	6	97	0	41	chr4_694352
chr4	694353	694353	7.9	7.9%_89r	chr4	694353	myo	EXON	0	82	7	0	89	0	36	0	0	36	7	89	0	36	chr4_694353
chr4	694394	694394	17	17.0%_88r	chr4	694394	myo	EXON	0	73	15	0	88	0	34	0	0	34	15	88	0	34	chr4_694394
chr4	695391	695391	10.4	10.4%_67r	chr4	695391	myo	EXON	0	60	7	0	67	0	38	0	0	38	7	67	0	38	chr4_695391
chr4	695414	695414	8.5	8.5%_59r	chr4	695414	myo	EXON	0	54	5	0	59	0	29	0	0	29	5	59	0	29	chr4_695414
chr4	695443	695443	15.8	15.8%_38r	chr4	695443	myo	EXON	0	32	6	0	38	0	30	0	0	30	6	38	0	30	chr4_695443
chr4	695485	695485	8	8.0%_25r	chr4	695485	myo	EXON	0	23	2	0	25	0	16	0	0	16	2	25	0	16	chr4_695485
chr4	695490	695490	8.3	8.3%_24r	chr4	695490	myo	EXON	0	22	2	0	24	0	15	0	0	15	2	24	0	15	chr4_695490
chr4	695509	695509	7.1	7.1%_28r	chr4	695509	myo	EXON	0	26	2	0	28	0	14	0	0	14	2	28	0	14	chr4_695509
chr4	695567	695567	10	10.0%_20r	chr4	695567	myo	EXON	0	18	2	0	20	1	11	0	0	12	2	20	0	12	chr4_695567
chr4	695995	695995	9.3	9.3%_43r	chr4	695995	myo	EXON	0	39	4	0	43	0	14	0	0	14	4	43	0	14	chr4_695995
chr4	177664	177664	11.4	11.4%_395r	chr4	177664	Arl4	EXON	0	350	45	0	395	0	86	0	0	86	45	395	0	86	chr4_177664
chr4	177800	177800	29.1	29.1%_454r	chr4	177800	Arl4	EXON	1	321	132	0	454	0	84	0	0	84	132	454	0	84	chr4_177800
chr4	177842	177842	6.7	6.7%_564r	chr4	177842	Arl4	EXON	0	526	38	0	564	0	132	0	0	132	38	564	0	132	chr4_177842
chr4	177875	177875	6	6.0%_633r	chr4	177875	Arl4	EXON	0	595	38	0	633	0	147	0	0	147	38	633	0	147	chr4_177875
chr4	178779	178779	11.4	11.4%_431r	chr4	178779	Arl4	EXON	1	381	49	0	431	0	95	0	0	95	49	431	0	95	chr4_178779
chr4	178807	178807	6.3	6.3%_462r	chr4	178807	Arl4	EXON	1	431	29	1	462	0	111	0	0	111	29	462	0	111	chr4_178807
chr4	179005	179005	14.8	14.8%_379r	chr4	179005	Arl4	EXON	0	323	56	0	379	0	71	0	0	71	56	379	0	71	chr4_179005
chr4	179008	179008	7.4	7.4%_475r	chr4	179008	Arl4	EXON	0	440	35	0	475	0	103	0	0	103	35	475	0	103	chr4_179008
chr4	179093	179093	28.6	28.6%_427r	chr4	179093	Arl4	EXON	0	305	122	0	427	0	153	0	0	153	122	427	0	153	chr4_179093
chr4	1115402	1115402	30.4	30.4%_56r	chr4	1115402	Cals	EXON	0	39	17	0	56	0	16	0	0	16	17	56	0	16	chr4_1115402
chr4	1115510	1115510	31	31.0%_113r	chr4	1115510	Cals	EXON	0	78	35	0	113	0	37	0	0	37	35	113	0	37	chr4_1115510
chr4	1115519	1115519	23.3	23.3%_103r	chr4	1115519	Cals	EXON	0	79	24	0	103	1	40	0	0	41	24	103	0	41	chr4_1115519
chr4	1115589	1115589	6.4	6.4%_156r	chr4	1115589	Cals	EXON	0	146	10	0	156	0	48	0	0	48	10	156	0	48	chr4_1115589
chr4	1115635	1115635	9.3	9.3%_54r	chr4	1115635	Cals	EXON	0	49	5	0	54	0	15	0	0	15	5	54	0	15	chr4_1115635
chr4	1115651	1115651	9.3	9.3%_43r	chr4	1115651	Cals	EXON	0	39	4	0	43	0	18	0	0	18	4	43	0	18	chr4_1115651
chr4	1115652	1115652	7	7.0%_43r	chr4	1115652	Cals	EXON	0	40	3	0	43	0	18	0	0	18	3	43	0	18	chr4_1115652
chr4	1115669	1115669	11.7	11.7%_77r	chr4	1115669	Cals	EXON	0	68	9	0	77	0	27	0	0	27	9	77	0	27	chr4_1115669
chr4	1115671	1115671	13.9	13.9%_79r	chr4	1115671	Cals	EXON	0	68	11	0	79	0	29	0	0	29	11	79	0	29	chr4_1115671
chr4	1115691	1115691	21.2	21.2%_118r	chr4	1115691	Cals	EXON	0	93	25	0	118	0	62	0	0	62	25	118	0	62	chr4_1115691
chr4	1115705	1115705	6.9	6.9%_130r	chr4	1115705	Cals	EXON	0	121	9	0	130	0	69	0	0	69	9	130	0	69	chr4_1115705
chr4	1115766	1115766	7.1	7.1%_127r	chr4	1115766	Cals	EXON	0	118	9	0	127	0	42	0	0	42	9	127	0	42	chr4_1115766
chr4	1115871	1115871	15.9	15.9%_82r	chr4	1115871	Cals	EXON	0	69	13	0	82	0	37	0	0	37	13	82	0	37	chr4_1115871
chr4	1115873	1115873	19.2	19.2%_78r	chr4	1115873	Cals	EXON	0	63	15	0	78	0	34	0	0	34	15	78	0	34	chr4_1115873
chr4	1115987	1115987	9.1	9.1%_44r	chr4	1115987	Cals	EXON	0	40	4	0	44	0	17	0	0	17	4	44	0	17	chr4_1115987
chr4	1115995	1115995	8.9	8.9%_45r	chr4	1115995	Cals	EXON	0	41	4	0	45	0	24	0	0	24	4	45	0	24	chr4_1115995
chr4	1116014	1116014	6.7	6.7%_60r	chr4	1116014	Cals	EXON	0	56	4	0	60	0	26	0	0	26	4	60	0	26	chr4_1116014
chr4	1116018	1116018	13.6	13.6%_66r	chr4	1116018	Cals	EXON	0	57	9	0	66	0	28	0	0	28	9	66	0	28	chr4_1116018
chr4	1116357	1116357	9.1	9.1%_77r	chr4	1116357	Cals	EXON	0	70	7	0	77	0	35	0	0	35	7	77	0	35	chr4_1116357
chr4	1116368	1116368	8.8	8.8%_68r	chr4	1116368	Cals	EXON	0	62	6	0	68	0	32	0	0	32	6	68	0	32	chr4_1116368
chr4	1116446	1116446	6.4	6.4%_94r	chr4	1116446	Cals	EXON	0	88	6	0	94	0	34	0	0	34	6	94	0	34	chr4_1116446
chr4	1116522	1116522	8.3	8.3%_84r	chr4	1116522	Cals	EXON	0	77	7	0	84	0	35	0	0	35	7	84	0	35	chr4_1116522
chr4	1116661	1116661	13.3	13.3%_90r	chr4	1116661	Cals	EXON	0	78	12	0	90	0	45	0	0	45	12	90	0	45	chr4_1116661
chr4	1116688	1116688	34.8	34.8%_69r	chr4	1116688	Cals	EXON	0	45	24	0	69	0	28	0	0	28	24	69	0	28	chr4_1116688
chr4	1116699	1116699	19	19.0%_42r	chr4	1116699	Cals	EXON	0	34	8	0	42	0	22	0	0	22	8	42	0	22	chr4_1116699
chr4	1116707	1116707	8.1	8.1%_37r	chr4	1116707	Cals	EXON	0	34	3	0	37	0	20	0	0	20	3	37	0	20	chr4_1116707
chr4	1116738	1116738	36.5	36.5%_52r	chr4	1116738	Cals	EXON	0	33	19	0	52	0	29	0	0	29	19	52	0	29	chr4_1116738
chr4	1116825	1116825	10.7	10.7%_84r	chr4	1116825	Cals	EXON	0	75	9	0	84	0	24	0	0	24	9	84	0	24	chr4_1116825
chr4	1116837	1116837	8.8	8.8%_57r	chr4	1116837	Cals	EXON	0	52	5	0	57	0	23	0	0	23	5	57	0	23	chr4_1116837
chr4	1116838	1116838	7	7.0%_57r	chr4	1116838	Cals	EXON	0	53	4	0	57	0	23	0	0	23	4	57	0	23	chr4_1116838
chr4	1116839	1116839	7.1	7.1%_56r	chr4	1116839	Cals	EXON	0	52	4	0	56	0	23	0	0	23	4	56	0	23	chr4_1116839
chr4	1116852	1116852	6.9	6.9%_58r	chr4	1116852	Cals	EXON	0	54	4	0	58	0	28	0	0	28	4	58	0	28	chr4_1116852
chr4	1116959	1116959	22.6	22.6%_93r	chr4	1116959	Cals	EXON	0	72	21	0	93	0	47	0	0	47	21	93	0	47	chr4_1116959
chr4	1117105	1117105	6.5	6.5%_62r	chr4	1117105	Cals	EXON	0	58	4	0	62	0	37	0	0	37	4	62	0	37	chr4_1117105
chr4	1117106	1117106	23	23.0%_61r	chr4	1117106	Cals	EXON	0	47	14	0	61	0	36	0	0	36	14	61	0	36	chr4_1117106
chr4	1117107	1117107	21.3	21.3%_61r	chr4	1117107	Cals	EXON	0	48	13	0	61	0	36	0	0	36	13	61	0	36	chr4_1117107
chr4	1117974	1117974	6.3	6.3%_63r	chr4	1117974	Cals	EXON	0	59	4	0	63	0	29	0	0	29	4	63	0	29	chr4_1117974
chr4	1118013	1118013	6.2	6.2%_81r	chr4	1118013	Cals	EXON	0	75	5	1	81	1	37	0	0	38	5	81	0	38	chr4_1118013
chr4	1118126	1118126	17.1	17.1%_117r	chr4	1118126	Cals	EXON	0	97	20	0	117	0	68	0	0	68	20	117	0	68	chr4_1118126
chr4	1118140	1118140	10.1	10.1%_89r	chr4	1118140	Cals	EXON	0	80	9	0	89	0	48	0	0	48	9	89	0	48	chr4_1118140
chr4	1118189	1118189	8.2	8.2%_61r	chr4	1118189	Cals	EXON	0	56	5	0	61	0	24	0	0	24	5	61	0	24	chr4_1118189
chr4	1118244	1118244	7	7.0%_57r	chr4	1118244	Cals	EXON	0	53	4	0	57	0	23	0	0	23	4	57	0	23	chr4_1118244
chr4	1118258	1118258	10.2	10.2%_59r	chr4	1118258	Cals	EXON	0	53	6	0	59	0	27	0	0	27	6	59	0	27	chr4_1118258
chr4	1118300	1118300	11.2	11.2%_80r	chr4	1118300	Cals	EXON	0	71	9	0	80	0	40	0	0	40	9	80	0	40	chr4_1118300
chr4	1118307	1118307	7.9	7.9%_101r	chr4	1118307	Cals	EXON	0	93	8	0	101	0	43	0	0	43	8	101	0	43	chr4_1118307
chr4	1118369	1118369	8.9	8.9%_79r	chr4	1118369	Cals	EXON	0	72	7	0	79	0	36	0	0	36	7	79	0	36	chr4_1118369
chr4	1118445	1118445	10.1	10.1%_89r	chr4	1118445	Cals	EXON	0	80	9	0	89	0	51	0	0	51	9	89	0	51	chr4_1118445
chr4	1118451	1118451	9.6	9.6%_104r	chr4	1118451	Cals	EXON	0	94	10	0	104	0	58	0	0	58	10	104	0	58	chr4_1118451
chr4	1118581	1118581	13.9	13.9%_101r	chr4	1118581	Cals	EXON	0	87	14	0	101	0	39	0	0	39	14	101	0	39	chr4_1118581
chr4	1118601	1118601	7.4	7.4%_95r	chr4	1118601	Cals	EXON	0	88	7	0	95	1	52	0	0	53	7	95	0	53	chr4_1118601
chr4	1118672	1118672	8.8	8.8%_34r	chr4	1118672	Cals	EXON	1	30	3	0	34	0	16	0	0	16	3	34	0	16	chr4_1118672
chr4	1118702	1118702	9.9	9.9%_91r	chr4	1118702	Cals	EXON	1	81	9	0	91	0	41	0	0	41	9	91	0	41	chr4_1118702
chr4	1118717	1118717	11.1	11.1%_99r	chr4	1118717	Cals	EXON	0	88	11	0	99	0	39	0	0	39	11	99	0	39	chr4_1118717
chr4	1118776	1118776	6	6.0%_83r	chr4	1118776	Cals	EXON	0	78	5	0	83	0	34	0	0	34	5	83	0	34	chr4_1118776
chr4	1118830	1118830	11.6	11.6%_69r	chr4	1118830	Cals	EXON	0	61	8	0	69	0	30	0	0	30	8	69	0	30	chr4_1118830
chr4	1118840	1118840	8	8.0%_88r	chr4	1118840	Cals	EXON	0	81	7	0	88	1	34	0	0	35	7	88	0	35	chr4_1118840
chr4	1118856	1118856	19.1	19.1%_89r	chr4	1118856	Cals	EXON	0	72	17	0	89	0	51	0	0	51	17	89	0	51	chr4_1118856
chr4	1118859	1118859	6.6	6.6%_91r	chr4	1118859	Cals	EXON	0	85	6	0	91	0	48	0	0	48	6	91	0	48	chr4_1118859
chr4	1118921	1118921	6.9	6.9%_87r	chr4	1118921	Cals	EXON	0	81	6	0	87	0	40	0	0	40	6	87	0	40	chr4_1118921
chr4	1118958	1118958	14	14.0%_86r	chr4	1118958	Cals	EXON	0	74	12	0	86	0	42	0	0	42	12	86	0	42	chr4_1118958
chr4	1118959	1118959	9.3	9.3%_86r	chr4	1118959	Cals	EXON	0	78	8	0	86	0	42	0	0	42	8	86	0	42	chr4_1118959
chr4	1120013	1120013	7.7	7.7%_52r	chr4	1120013	Cals	EXON	0	48	4	0	52	0	45	0	0	45	4	52	0	45	chr4_1120013
chr4	1120133	1120133	6.3	6.3%_79r	chr4	1120133	Cals	EXON	0	74	5	0	79	0	41	0	0	41	5	79	0	41	chr4_1120133
chr4	1120193	1120193	14.7	14.7%_136r	chr4	1120193	Cals	EXON	0	116	20	0	136	0	55	0	0	55	20	136	0	55	chr4_1120193
chr4	1120248	1120248	8.5	8.5%_94r	chr4	1120248	Cals	EXON	0	86	8	0	94	0	39	0	1	40	8	94	0	40	chr4_1120248
chr4	1120289	1120289	10.8	10.8%_83r	chr4	1120289	Cals	EXON	0	74	9	0	83	0	36	0	0	36	9	83	0	36	chr4_1120289
chr4	1120370	1120370	22.5	22.5%_71r	chr4	1120370	Cals	EXON	0	55	16	0	71	0	23	0	0	23	16	71	0	23	chr4_1120370
chr4	1120371	1120371	6.9	6.9%_72r	chr4	1120371	Cals	EXON	0	67	5	0	72	0	23	0	0	23	5	72	0	23	chr4_1120371
chr4	1120449	1120449	17.3	17.3%_98r	chr4	1120449	Cals	EXON	0	81	17	0	98	0	49	0	0	49	17	98	0	49	chr4_1120449
chr4	1120501	1120501	14	14.0%_100r	chr4	1120501	Cals	EXON	1	84	14	1	100	0	56	0	0	56	14	100	0	56	chr4_1120501
chr4	1120516	1120516	10.6	10.6%_104r	chr4	1120516	Cals	EXON	0	93	11	0	104	0	51	0	0	51	11	104	0	51	chr4_1120516
chr4	1120558	1120558	26.8	26.8%_56r	chr4	1120558	Cals	EXON	0	41	15	0	56	0	30	0	0	30	15	56	0	30	chr4_1120558
chr4	1120688	1120688	20.3	20.3%_64r	chr4	1120688	Cals	EXON	0	51	13	0	64	0	23	0	0	23	13	64	0	23	chr4_1120688
chr4	1120716	1120716	10.6	10.6%_66r	chr4	1120716	Cals	EXON	0	59	7	0	66	0	30	0	0	30	7	66	0	30	chr4_1120716
chr4	1120746	1120746	6.9	6.9%_58r	chr4	1120746	Cals	EXON	0	54	4	0	58	0	36	0	0	36	4	58	0	36	chr4_1120746
chr4	1121466	1121466	11.1	11.1%_45r	chr4	1121466	Cals	EXON	0	40	5	0	45	0	27	0	0	27	5	45	0	27	chr4_1121466
chr4	1121492	1121492	8.9	8.9%_56r	chr4	1121492	Cals	EXON	0	51	5	0	56	0	24	0	0	24	5	56	0	24	chr4_1121492
chr4	1121498	1121498	7.8	7.8%_64r	chr4	1121498	Cals	EXON	0	59	5	0	64	0	29	0	0	29	5	64	0	29	chr4_1121498
chr4	1121535	1121535	19.8	19.8%_91r	chr4	1121535	Cals	EXON	0	73	18	0	91	0	43	0	0	43	18	91	0	43	chr4_1121535
chr4	1121573	1121573	7	7.0%_57r	chr4	1121573	Cals	EXON	0	53	4	0	57	0	27	0	0	27	4	57	0	27	chr4_1121573
chr4	1123314	1123314	6.9	6.9%_29r	chr4	1123314	Cals	EXON	0	27	2	0	29	0	15	0	0	15	2	29	0	15	chr4_1123314
chr4	1123317	1123317	6.7	6.7%_30r	chr4	1123317	Cals	EXON	0	28	2	0	30	0	15	0	0	15	2	30	0	15	chr4_1123317
chr4	915329	915329	6	6.0%_116r	chr4	915329	eIF4G	EXON	0	109	7	0	116	0	46	0	0	46	7	116	0	46	chr4_915329
chr4	915376	915376	6.5	6.5%_107r	chr4	915376	eIF4G	EXON	0	100	7	0	107	0	36	0	0	36	7	107	0	36	chr4_915376
chr4	915466	915466	34.9	34.9%_43r	chr4	915466	eIF4G	EXON	0	28	15	0	43	0	21	0	0	21	15	43	0	21	chr4_915466
chr4	915490	915490	11.5	11.5%_61r	chr4	915490	eIF4G	EXON	0	54	7	0	61	0	48	0	0	48	7	61	0	48	chr4_915490
chr4	915520	915520	9.4	9.4%_64r	chr4	915520	eIF4G	EXON	0	58	6	0	64	0	35	0	0	35	6	64	0	35	chr4_915520
chr4	915521	915521	9.1	9.1%_66r	chr4	915521	eIF4G	EXON	0	60	6	0	66	0	36	0	0	36	6	66	0	36	chr4_915521
chr4	915539	915539	8	8.0%_50r	chr4	915539	eIF4G	EXON	0	46	4	0	50	0	35	0	0	35	4	50	0	35	chr4_915539
chr4	915862	915862	16.2	16.2%_117r	chr4	915862	eIF4G	EXON	0	98	19	0	117	0	50	0	0	50	19	117	0	50	chr4_915862
chr4	916184	916184	7.1	7.1%_98r	chr4	916184	eIF4G	EXON	0	91	7	0	98	0	46	0	0	46	7	98	0	46	chr4_916184
chr4	916926	916926	9.7	9.7%_62r	chr4	916926	eIF4G	EXON	0	56	6	0	62	0	24	0	0	24	6	62	0	24	chr4_916926
chr4	916969	916969	6.2	6.2%_80r	chr4	916969	eIF4G	EXON	0	75	5	0	80	0	54	0	0	54	5	80	0	54	chr4_916969
chr4	917035	917035	11.6	11.6%_43r	chr4	917035	eIF4G	EXON	0	38	5	0	43	0	33	0	0	33	5	43	0	33	chr4_917035
chr4	917352	917352	8	8.0%_50r	chr4	917352	eIF4G	EXON	0	46	4	0	50	0	34	0	0	34	4	50	0	34	chr4_917352
chr4	917391	917391	36.5	36.5%_63r	chr4	917391	eIF4G	EXON	0	40	23	0	63	0	33	0	0	33	23	63	0	33	chr4_917391
chr4	917504	917504	35.1	35.1%_77r	chr4	917504	eIF4G	EXON	0	50	27	0	77	0	34	0	0	34	27	77	0	34	chr4_917504
chr4	917543	917543	10	10.0%_40r	chr4	917543	eIF4G	EXON	1	35	4	0	40	0	28	0	0	28	4	40	0	28	chr4_917543
chr4	917600	917600	8.1	8.1%_37r	chr4	917600	eIF4G	EXON	0	34	3	0	37	0	26	0	0	26	3	37	0	26	chr4_917600
chr4	917689	917689	6.7	6.7%_75r	chr4	917689	eIF4G	EXON	0	70	5	0	75	1	38	0	0	39	5	75	0	39	chr4_917689
chr4	918662	918662	7	7.0%_43r	chr4	918662	eIF4G	EXON	0	40	3	0	43	0	27	0	0	27	3	43	0	27	chr4_918662
chr4	918703	918703	9.5	9.5%_21r	chr4	918703	eIF4G	EXON	0	19	2	0	21	0	18	0	0	18	2	21	0	18	chr4_918703
chr4	919497	919497	7.1	7.1%_42r	chr4	919497	eIF4G	EXON	0	39	3	0	42	0	39	0	0	39	3	42	0	39	chr4_919497
chr4	919520	919520	8	8.0%_50r	chr4	919520	eIF4G	EXON	0	46	4	0	50	0	45	0	0	45	4	50	0	45	chr4_919520
chr4	919674	919674	6.1	6.1%_33r	chr4	919674	eIF4G	EXON	0	31	2	0	33	0	22	0	0	22	2	33	0	22	chr4_919674
chr4	919862	919862	6.1	6.1%_49r	chr4	919862	eIF4G	EXON	0	46	3	0	49	0	44	0	0	44	3	49	0	44	chr4_919862
chr4	919900	919900	12.2	12.2%_41r	chr4	919900	eIF4G	EXON	0	36	5	0	41	0	39	0	0	39	5	41	0	39	chr4_919900
chr4	920167	920167	7.8	7.8%_77r	chr4	920167	eIF4G	EXON	0	71	6	0	77	1	49	0	0	50	6	77	0	50	chr4_920167
chr4	920180	920180	7.2	7.2%_69r	chr4	920180	eIF4G	EXON	0	64	5	0	69	0	46	0	0	46	5	69	0	46	chr4_920180
chr4	920264	920264	10.7	10.7%_56r	chr4	920264	eIF4G	EXON	0	50	6	0	56	0	40	0	0	40	6	56	0	40	chr4_920264
chr4	920287	920287	10.3	10.3%_58r	chr4	920287	eIF4G	EXON	0	52	6	0	58	0	50	0	0	50	6	58	0	50	chr4_920287
chr4	920294	920294	7.2	7.2%_69r	chr4	920294	eIF4G	EXON	0	64	5	0	69	0	57	0	0	57	5	69	0	57	chr4_920294
chr4	920373	920373	7.2	7.2%_69r	chr4	920373	eIF4G	EXON	0	64	5	0	69	0	58	0	0	58	5	69	0	58	chr4_920373
chr4	920451	920451	6.1	6.1%_66r	chr4	920451	eIF4G	EXON	0	62	4	0	66	0	37	0	0	37	4	66	0	37	chr4_920451
chr4	920464	920464	9.2	9.2%_87r	chr4	920464	eIF4G	EXON	0	79	8	0	87	0	47	0	0	47	8	87	0	47	chr4_920464
chr4	920631	920631	7	7.0%_43r	chr4	920631	eIF4G	EXON	0	40	3	0	43	0	29	0	0	29	3	43	0	29	chr4_920631
chr4	920634	920634	6.8	6.8%_44r	chr4	920634	eIF4G	EXON	0	41	3	0	44	0	31	0	0	31	3	44	0	31	chr4_920634
chr4	920668	920668	6.4	6.4%_47r	chr4	920668	eIF4G	EXON	0	44	3	0	47	0	32	0	0	32	3	47	0	32	chr4_920668
chr4	920816	920816	55	55.0%_60r	chr4	920816	eIF4G	EXON	0	27	33	0	60	0	34	0	0	34	33	60	0	34	chr4_920816
chr4	920826	920826	7.1	7.1%_56r	chr4	920826	eIF4G	EXON	0	52	4	0	56	0	31	0	0	31	4	56	0	31	chr4_920826
chr4	920880	920880	10.1	10.1%_89r	chr4	920880	eIF4G	EXON	0	80	9	0	89	0	51	0	0	51	9	89	0	51	chr4_920880
chr4	921006	921006	11.1	11.1%_72r	chr4	921006	eIF4G	EXON	0	64	8	0	72	0	36	0	0	36	8	72	0	36	chr4_921006
chr4	921011	921011	8.6	8.6%_81r	chr4	921011	eIF4G	EXON	0	74	7	0	81	0	43	0	0	43	7	81	0	43	chr4_921011
chr4	925089	925089	7.5	7.5%_80r	chr4	925089	eIF4G	EXON	0	74	6	0	80	0	50	0	0	50	6	80	0	50	chr4_925089
chr4	925796	925796	6.5	6.5%_77r	chr4	925796	eIF4G	EXON	0	71	5	1	77	0	52	0	0	52	5	77	0	52	chr4_925796
chr4	925831	925831	8.5	8.5%_106r	chr4	925831	eIF4G	EXON	0	97	9	0	106	0	63	0	0	63	9	106	0	63	chr4_925831
chr4	926060	926060	21.6	21.6%_51r	chr4	926060	eIF4G	EXON	0	40	11	0	51	0	34	0	0	34	11	51	0	34	chr4_926060
chr4	926096	926096	9.3	9.3%_86r	chr4	926096	eIF4G	EXON	0	77	8	1	86	0	60	0	0	60	8	86	0	60	chr4_926096
chr4	926259	926259	8.2	8.2%_73r	chr4	926259	eIF4G	EXON	0	67	6	0	73	0	56	0	0	56	6	73	0	56	chr4_926259
chr4	926306	926306	11.4	11.4%_88r	chr4	926306	eIF4G	EXON	0	78	10	0	88	0	54	0	0	54	10	88	0	54	chr4_926306
chr4	926352	926352	11.1	11.1%_99r	chr4	926352	eIF4G	EXON	1	87	11	0	99	0	68	0	0	68	11	99	0	68	chr4_926352
chr4	926544	926544	17.8	17.8%_152r	chr4	926544	eIF4G	EXON	0	125	27	0	152	0	253	0	0	253	27	152	0	253	chr4_926544
chr4	927818	927818	12	12.0%_50r	chr4	927818	eIF4G	EXON	0	44	6	0	50	0	15	0	0	15	6	50	0	15	chr4_927818
chr4	927833	927833	12.5	12.5%_48r	chr4	927833	eIF4G	EXON	0	42	6	0	48	0	14	0	0	14	6	48	0	14	chr4_927833
chr4	928058	928058	6.2	6.2%_48r	chr4	928058	eIF4G	EXON	0	45	3	0	48	0	11	0	0	11	3	48	0	11	chr4_928058
chr4	929848	929848	7.4	7.4%_242r	chr4	929848	eIF4G	EXON	0	224	18	0	242	0	339	1	0	340	18	242	1	340	chr4_929848
chr4	929960	929960	19	19.0%_116r	chr4	929960	eIF4G	EXON	0	94	22	0	116	0	200	0	0	200	22	116	0	200	chr4_929960
chr4	930089	930089	6	6.0%_233r	chr4	930089	eIF4G	EXON	0	219	14	0	233	0	333	0	0	333	14	233	0	333	chr4_930089
chr4	930124	930124	8.2	8.2%_98r	chr4	930124	eIF4G	EXON	0	90	8	0	98	1	160	0	0	161	8	98	0	161	chr4_930124
chr4	930592	930592	28.8	28.8%_52r	chr4	930592	eIF4G	EXON	0	37	15	0	52	0	77	0	0	77	15	52	0	77	chr4_930592
chr4	930593	930593	13	13.0%_54r	chr4	930593	eIF4G	EXON	0	47	7	0	54	0	83	0	0	83	7	54	0	83	chr4_930593
chr4	930639	930639	36.2	36.2%_58r	chr4	930639	eIF4G	EXON	0	37	21	0	58	0	69	0	0	69	21	58	0	69	chr4_930639
chr4	1029994	1029994	14.1	14.1%_156r	chr4	1029994	CG11076	EXON	0	134	22	0	156	1	63	0	0	64	22	156	0	64	chr4_1029994
chr4	1030023	1030023	18.6	18.6%_113r	chr4	1030023	CG11076	EXON	0	92	21	0	113	0	55	0	0	55	21	113	0	55	chr4_1030023
chr4	359998	359998	10	10.0%_30r	chr4	359998	Hcf	EXON	27	0	0	3	30	14	0	0	0	14	3	30	0	14	chr4_359998
chr4	360039	360039	12.8	12.8%_47r	chr4	360039	Hcf	EXON	40	1	0	6	47	12	0	0	0	12	6	47	0	12	chr4_360039
chr4	360136	360136	8	8.0%_25r	chr4	360136	Hcf	EXON	23	0	0	2	25	18	0	0	0	18	2	25	0	18	chr4_360136
chr4	360137	360137	7.7	7.7%_26r	chr4	360137	Hcf	EXON	24	0	0	2	26	19	0	0	0	19	2	26	0	19	chr4_360137
chr4	360179	360179	18.1	18.1%_72r	chr4	360179	Hcf	EXON	59	0	0	13	72	36	0	0	0	36	13	72	0	36	chr4_360179
chr4	360241	360241	9.3	9.3%_54r	chr4	360241	Hcf	EXON	48	1	0	5	54	20	0	0	0	20	5	54	0	20	chr4_360241
chr4	360244	360244	36.8	36.8%_57r	chr4	360244	Hcf	EXON	36	0	0	21	57	22	0	0	0	22	21	57	0	22	chr4_360244
chr4	360275	360275	7.4	7.4%_94r	chr4	360275	Hcf	EXON	87	0	0	7	94	29	0	0	0	29	7	94	0	29	chr4_360275
chr4	360276	360276	17	17.0%_94r	chr4	360276	Hcf	EXON	78	0	0	16	94	30	0	0	0	30	16	94	0	30	chr4_360276
chr4	360811	360811	12.4	12.4%_153r	chr4	360811	Hcf	EXON	134	0	0	19	153	63	0	0	0	63	19	153	0	63	chr4_360811
chr4	360836	360836	7.9	7.9%_152r	chr4	360836	Hcf	EXON	140	0	0	12	152	70	0	0	0	70	12	152	0	70	chr4_360836
chr4	360934	360934	7.6	7.6%_132r	chr4	360934	Hcf	EXON	122	0	0	10	132	42	0	0	0	42	10	132	0	42	chr4_360934
chr4	361009	361009	33.1	33.1%_151r	chr4	361009	Hcf	INTRON	101	0	0	50	151	72	0	0	0	72	50	151	0	72	chr4_361009
chr4	361060	361060	7.1	7.1%_112r	chr4	361060	Hcf	INTRON	104	0	0	8	112	39	0	0	0	39	8	112	0	39	chr4_361060
chr4	361106	361106	9.5	9.5%_74r	chr4	361106	Hcf	INTRON	67	0	0	7	74	18	0	0	0	18	7	74	0	18	chr4_361106
chr4	361112	361112	7.4	7.4%_68r	chr4	361112	Hcf	INTRON	63	0	0	5	68	19	0	0	0	19	5	68	0	19	chr4_361112
chr4	362319	362319	7.7	7.7%_104r	chr4	362319	Hcf	EXON	96	0	0	8	104	46	0	0	0	46	8	104	0	46	chr4_362319
chr4	363086	363086	11.1	11.1%_63r	chr4	363086	Hcf	EXON	55	0	1	7	63	30	0	0	0	30	7	63	0	30	chr4_363086
chr4	363524	363524	7.4	7.4%_95r	chr4	363524	Hcf	EXON	88	0	0	7	95	37	0	0	0	37	7	95	0	37	chr4_363524
chr4	363531	363531	37.2	37.2%_86r	chr4	363531	Hcf	EXON	54	0	0	32	86	48	0	0	0	48	32	86	0	48	chr4_363531
chr4	363582	363582	14.3	14.3%_49r	chr4	363582	Hcf	EXON	42	0	0	7	49	31	0	0	0	31	7	49	0	31	chr4_363582
chr4	363583	363583	51	51.0%_49r	chr4	363583	Hcf	EXON	24	0	0	25	49	31	0	0	0	31	25	49	0	31	chr4_363583
chr4	363624	363624	9.1	9.1%_77r	chr4	363624	Hcf	EXON	70	0	0	7	77	25	0	0	0	25	7	77	0	25	chr4_363624
chr4	363643	363643	7.1	7.1%_42r	chr4	363643	Hcf	EXON	39	0	0	3	42	21	0	0	0	21	3	42	0	21	chr4_363643
chr4	363921	363921	20.9	20.9%_43r	chr4	363921	Hcf	EXON	34	0	0	9	43	29	0	0	0	29	9	43	0	29	chr4_363921
chr4	363923	363923	10.2	10.2%_49r	chr4	363923	Hcf	EXON	44	0	0	5	49	32	0	0	0	32	5	49	0	32	chr4_363923
chr4	364050	364050	22.5	22.5%_40r	chr4	364050	Hcf	EXON	31	0	0	9	40	34	0	0	0	34	9	40	0	34	chr4_364050
chr4	364117	364117	22.2	22.2%_45r	chr4	364117	Hcf	EXON	35	0	0	10	45	27	0	0	0	27	10	45	0	27	chr4_364117
chr4	364162	364162	6.1	6.1%_49r	chr4	364162	Hcf	EXON	46	0	0	3	49	27	0	0	0	27	3	49	0	27	chr4_364162
chr4	364193	364193	9.1	9.1%_44r	chr4	364193	Hcf	EXON	40	0	0	4	44	25	0	0	0	25	4	44	0	25	chr4_364193
chr4	364219	364219	10.5	10.5%_38r	chr4	364219	Hcf	EXON	34	0	0	4	38	19	0	0	0	19	4	38	0	19	chr4_364219
chr4	364291	364291	6.1	6.1%_33r	chr4	364291	Hcf	EXON	31	0	0	2	33	21	0	0	0	21	2	33	0	21	chr4_364291
chr4	364293	364293	6.2	6.2%_32r	chr4	364293	Hcf	EXON	30	0	0	2	32	18	0	0	0	18	2	32	0	18	chr4_364293
chr4	364336	364336	26.2	26.2%_42r	chr4	364336	Hcf	EXON	31	0	0	11	42	34	0	0	0	34	11	42	0	34	chr4_364336
chr4	364361	364361	6.5	6.5%_46r	chr4	364361	Hcf	EXON	43	0	0	3	46	33	0	0	0	33	3	46	0	33	chr4_364361
chr4	364443	364443	7	7.0%_43r	chr4	364443	Hcf	EXON	40	0	0	3	43	28	0	0	0	28	3	43	0	28	chr4_364443
chr4	364462	364462	23.7	23.7%_38r	chr4	364462	Hcf	EXON	29	0	0	9	38	23	0	0	0	23	9	38	0	23	chr4_364462
chr4	364533	364533	12.5	12.5%_24r	chr4	364533	Hcf	EXON	21	0	0	3	24	23	0	0	0	23	3	24	0	23	chr4_364533
chr4	364591	364591	18.6	18.6%_43r	chr4	364591	Hcf	EXON	35	0	0	8	43	18	0	0	0	18	8	43	0	18	chr4_364591
chr4	364655	364655	10.4	10.4%_48r	chr4	364655	Hcf	EXON	43	0	0	5	48	27	0	0	0	27	5	48	0	27	chr4_364655
chr4	364796	364796	14.6	14.6%_41r	chr4	364796	Hcf	EXON	35	0	0	6	41	22	0	0	0	22	6	41	0	22	chr4_364796
chr4	364859	364859	6.1	6.1%_33r	chr4	364859	Hcf	EXON	31	0	0	2	33	17	0	0	0	17	2	33	0	17	chr4_364859
chr4	364935	364935	7.9	7.9%_38r	chr4	364935	Hcf	EXON	35	0	0	3	38	17	0	0	0	17	3	38	0	17	chr4_364935
chr4	365730	365730	6.9	6.9%_29r	chr4	365730	Hcf	EXON	27	0	0	2	29	13	0	0	0	13	2	29	0	13	chr4_365730
chr4	365821	365821	6.7	6.7%_30r	chr4	365821	Hcf	EXON	28	0	0	2	30	11	0	0	0	11	2	30	0	11	chr4_365821
chr4	365847	365847	9.1	9.1%_44r	chr4	365847	Hcf	EXON	40	0	0	4	44	21	0	0	0	21	4	44	0	21	chr4_365847
chr4	365848	365848	6.8	6.8%_44r	chr4	365848	Hcf	EXON	41	0	0	3	44	20	1	0	0	21	3	44	0	21	chr4_365848
chr4	365882	365882	7	7.0%_43r	chr4	365882	Hcf	EXON	40	0	0	3	43	19	0	0	0	19	3	43	0	19	chr4_365882
chr4	365899	365899	9.6	9.6%_52r	chr4	365899	Hcf	EXON	47	0	0	5	52	27	0	0	0	27	5	52	0	27	chr4_365899
chr4	365944	365944	14.3	14.3%_56r	chr4	365944	Hcf	EXON	48	0	0	8	56	23	0	0	0	23	8	56	0	23	chr4_365944
chr4	366068	366068	6.9	6.9%_29r	chr4	366068	Hcf	EXON	27	0	0	2	29	18	0	0	0	18	2	29	0	18	chr4_366068
chr4	366126	366126	7.7	7.7%_39r	chr4	366126	Hcf	EXON	36	0	0	3	39	23	0	1	0	24	3	39	0	24	chr4_366126
chr4	366168	366168	8.8	8.8%_80r	chr4	366168	Hcf	EXON	73	0	0	7	80	41	0	0	0	41	7	80	0	41	chr4_366168
chr4	366237	366237	17.6	17.6%_51r	chr4	366237	Hcf	EXON	42	0	0	9	51	20	0	0	0	20	9	51	0	20	chr4_366237
chr4	366311	366311	17.4	17.4%_23r	chr4	366311	Hcf	EXON	19	0	0	4	23	10	0	0	0	10	4	23	0	10	chr4_366311
chr4	366322	366322	10	10.0%_20r	chr4	366322	Hcf	EXON	18	0	0	2	20	11	0	0	0	11	2	20	0	11	chr4_366322
chr4	366366	366366	7.3	7.3%_41r	chr4	366366	Hcf	EXON	38	0	0	3	41	16	0	0	0	16	3	41	0	16	chr4_366366
chr4	366455	366455	9.1	9.1%_66r	chr4	366455	Hcf	EXON	60	0	0	6	66	41	0	0	0	41	6	66	0	41	chr4_366455
chr4	366528	366528	15.4	15.4%_26r	chr4	366528	Hcf	EXON	22	0	0	4	26	10	0	0	0	10	4	26	0	10	chr4_366528
chr4	366529	366529	42.3	42.3%_26r	chr4	366529	Hcf	EXON	15	0	0	11	26	12	0	0	0	12	11	26	0	12	chr4_366529
chr4	366687	366687	12.1	12.1%_33r	chr4	366687	Hcf	EXON	29	0	0	4	33	24	0	0	0	24	4	33	0	24	chr4_366687
chr4	366699	366699	8.8	8.8%_34r	chr4	366699	Hcf	EXON	31	0	0	3	34	24	0	0	0	24	3	34	0	24	chr4_366699
chr4	369623	369623	7.9	7.9%_38r	chr4	369623	Hcf	EXON	35	0	0	3	38	23	0	0	0	23	3	38	0	23	chr4_369623
chr4	369920	369920	7.7	7.7%_26r	chr4	369920	Hcf	EXON	24	0	0	2	26	13	0	0	0	13	2	26	0	13	chr4_369920
chr4	371197	371197	8.9	8.9%_56r	chr4	371197	Hcf	EXON	51	0	0	5	56	23	0	0	0	23	5	56	0	23	chr4_371197
chr4	371238	371238	15	15.0%_60r	chr4	371238	Hcf	EXON	51	0	0	9	60	18	0	0	0	18	9	60	0	18	chr4_371238
chr4	371828	371828	12	12.0%_25r	chr4	371828	Hcf	EXON	22	0	0	3	25	12	0	0	0	12	3	25	0	12	chr4_371828
chr4	371930	371930	7.8	7.8%_90r	chr4	371930	Hcf	EXON	83	0	0	7	90	30	0	0	0	30	7	90	0	30	chr4_371930
chr4	372031	372031	25.4	25.4%_114r	chr4	372031	Hcf	EXON	85	0	0	29	114	45	0	0	0	45	29	114	0	45	chr4_372031
chr4	372279	372279	8.7	8.7%_92r	chr4	372279	Hcf	EXON	84	0	0	8	92	34	0	0	0	34	8	92	0	34	chr4_372279
chr4	372396	372396	11.7	11.7%_214r	chr4	372396	Hcf	EXON	188	0	1	25	214	88	1	0	0	89	25	214	0	89	chr4_372396
chr4	372464	372464	37	37.0%_138r	chr4	372464	Hcf	EXON	87	0	0	51	138	61	0	0	0	61	51	138	0	61	chr4_372464
chr4	372479	372479	11.4	11.4%_88r	chr4	372479	Hcf	EXON	78	0	0	10	88	36	0	0	0	36	10	88	0	36	chr4_372479
chr4	372491	372491	15	15.0%_100r	chr4	372491	Hcf	EXON	84	0	1	15	100	37	0	0	0	37	15	100	0	37	chr4_372491
chr4	372521	372521	14	14.0%_86r	chr4	372521	Hcf	EXON	74	0	0	12	86	32	0	0	0	32	12	86	0	32	chr4_372521
chr4	1013691	1013691	6.2	6.2%_65r	chr4	1013691	PlexA	EXON	0	61	4	0	65	0	17	0	0	17	4	65	0	17	chr4_1013691
chr4	1013741	1013741	10.2	10.2%_88r	chr4	1013741	PlexA	EXON	0	79	9	0	88	0	45	0	0	45	9	88	0	45	chr4_1013741
chr4	1013743	1013743	6.3	6.3%_79r	chr4	1013743	PlexA	EXON	0	74	5	0	79	0	45	0	0	45	5	79	0	45	chr4_1013743
chr4	1013758	1013758	37.8	37.8%_45r	chr4	1013758	PlexA	EXON	0	28	17	0	45	0	33	0	0	33	17	45	0	33	chr4_1013758
chr4	1014331	1014331	10.6	10.6%_66r	chr4	1014331	PlexA	EXON	0	59	7	0	66	0	20	0	0	20	7	66	0	20	chr4_1014331
chr4	1014359	1014359	25	25.0%_88r	chr4	1014359	PlexA	EXON	0	66	22	0	88	0	31	0	0	31	22	88	0	31	chr4_1014359
chr4	1014360	1014360	11.2	11.2%_89r	chr4	1014360	PlexA	EXON	0	79	10	0	89	0	31	0	0	31	10	89	0	31	chr4_1014360
chr4	1014379	1014379	7.5	7.5%_93r	chr4	1014379	PlexA	EXON	0	86	7	0	93	0	28	0	0	28	7	93	0	28	chr4_1014379
chr4	1014397	1014397	13.6	13.6%_59r	chr4	1014397	PlexA	EXON	0	51	8	0	59	0	17	0	0	17	8	59	0	17	chr4_1014397
chr4	1014442	1014442	17.8	17.8%_101r	chr4	1014442	PlexA	EXON	0	83	18	0	101	0	40	0	0	40	18	101	0	40	chr4_1014442
chr4	1014459	1014459	9.8	9.8%_123r	chr4	1014459	PlexA	EXON	0	111	12	0	123	0	50	0	0	50	12	123	0	50	chr4_1014459
chr4	1014482	1014482	11.6	11.6%_173r	chr4	1014482	PlexA	EXON	0	153	20	0	173	0	70	0	0	70	20	173	0	70	chr4_1014482
chr4	1014507	1014507	10.3	10.3%_107r	chr4	1014507	PlexA	EXON	0	96	11	0	107	0	44	0	0	44	11	107	0	44	chr4_1014507
chr4	1014585	1014585	20.3	20.3%_59r	chr4	1014585	PlexA	EXON	0	47	12	0	59	0	23	0	0	23	12	59	0	23	chr4_1014585
chr4	1014592	1014592	9.8	9.8%_51r	chr4	1014592	PlexA	EXON	0	46	5	0	51	0	29	0	0	29	5	51	0	29	chr4_1014592
chr4	1014603	1014603	24.5	24.5%_53r	chr4	1014603	PlexA	EXON	0	40	13	0	53	0	28	0	0	28	13	53	0	28	chr4_1014603
chr4	1014622	1014622	10.8	10.8%_83r	chr4	1014622	PlexA	EXON	0	74	9	0	83	1	37	0	0	38	9	83	0	38	chr4_1014622
chr4	1014664	1014664	15.1	15.1%_106r	chr4	1014664	PlexA	EXON	0	90	16	0	106	0	45	0	0	45	16	106	0	45	chr4_1014664
chr4	1014673	1014673	12.3	12.3%_106r	chr4	1014673	PlexA	EXON	0	93	13	0	106	0	43	0	0	43	13	106	0	43	chr4_1014673
chr4	1014691	1014691	7.3	7.3%_96r	chr4	1014691	PlexA	EXON	0	89	7	0	96	0	40	0	0	40	7	96	0	40	chr4_1014691
chr4	1014707	1014707	15.5	15.5%_58r	chr4	1014707	PlexA	EXON	0	49	9	0	58	0	30	0	0	30	9	58	0	30	chr4_1014707
chr4	1014715	1014715	8.1	8.1%_37r	chr4	1014715	PlexA	EXON	0	34	3	0	37	0	24	0	0	24	3	37	0	24	chr4_1014715
chr4	1014724	1014724	6.7	6.7%_30r	chr4	1014724	PlexA	EXON	0	28	2	0	30	0	26	0	0	26	2	30	0	26	chr4_1014724
chr4	1014725	1014725	6.7	6.7%_30r	chr4	1014725	PlexA	EXON	0	28	2	0	30	0	26	0	0	26	2	30	0	26	chr4_1014725
chr4	1014819	1014819	15.2	15.2%_46r	chr4	1014819	PlexA	EXON	0	39	7	0	46	0	37	0	0	37	7	46	0	37	chr4_1014819
chr4	1014824	1014824	21.2	21.2%_52r	chr4	1014824	PlexA	EXON	0	41	11	0	52	0	34	0	0	34	11	52	0	34	chr4_1014824
chr4	1014827	1014827	33.3	33.3%_60r	chr4	1014827	PlexA	EXON	0	40	20	0	60	0	37	0	0	37	20	60	0	37	chr4_1014827
chr4	1014848	1014848	36.7	36.7%_49r	chr4	1014848	PlexA	EXON	0	31	18	0	49	0	30	0	0	30	18	49	0	30	chr4_1014848
chr4	1014852	1014852	17.8	17.8%_45r	chr4	1014852	PlexA	EXON	0	37	8	0	45	0	31	0	0	31	8	45	0	31	chr4_1014852
chr4	1014857	1014857	10.9	10.9%_46r	chr4	1014857	PlexA	EXON	0	41	5	0	46	0	36	0	0	36	5	46	0	36	chr4_1014857
chr4	1014974	1014974	35.3	35.3%_51r	chr4	1014974	PlexA	EXON	0	33	18	0	51	0	43	0	0	43	18	51	0	43	chr4_1014974
chr4	1014979	1014979	28.6	28.6%_49r	chr4	1014979	PlexA	EXON	0	35	14	0	49	0	42	0	0	42	14	49	0	42	chr4_1014979
chr4	1015004	1015004	17.9	17.9%_56r	chr4	1015004	PlexA	EXON	0	46	10	0	56	0	37	0	0	37	10	56	0	37	chr4_1015004
chr4	1015015	1015015	42.1	42.1%_57r	chr4	1015015	PlexA	EXON	1	32	24	0	57	0	44	0	0	44	24	57	0	44	chr4_1015015
chr4	1015018	1015018	46.6	46.6%_58r	chr4	1015018	PlexA	EXON	0	31	27	0	58	0	45	0	0	45	27	58	0	45	chr4_1015018
chr4	1015023	1015023	13.5	13.5%_52r	chr4	1015023	PlexA	EXON	0	45	7	0	52	0	30	0	0	30	7	52	0	30	chr4_1015023
chr4	1015059	1015059	7.3	7.3%_82r	chr4	1015059	PlexA	EXON	0	76	6	0	82	0	49	0	0	49	6	82	0	49	chr4_1015059
chr4	1015073	1015073	7.1	7.1%_70r	chr4	1015073	PlexA	EXON	0	65	5	0	70	0	34	0	0	34	5	70	0	34	chr4_1015073
chr4	1015079	1015079	13.6	13.6%_59r	chr4	1015079	PlexA	EXON	0	51	8	0	59	0	26	0	0	26	8	59	0	26	chr4_1015079
chr4	1015099	1015099	8	8.0%_75r	chr4	1015099	PlexA	EXON	0	69	6	0	75	0	35	0	0	35	6	75	0	35	chr4_1015099
chr4	1015108	1015108	16.1	16.1%_56r	chr4	1015108	PlexA	EXON	0	47	9	0	56	0	28	0	0	28	9	56	0	28	chr4_1015108
chr4	1015111	1015111	58.1	58.1%_43r	chr4	1015111	PlexA	EXON	0	18	25	0	43	0	20	0	0	20	25	43	0	20	chr4_1015111
chr4	1015144	1015144	6.1	6.1%_33r	chr4	1015144	PlexA	EXON	0	31	2	0	33	0	27	0	0	27	2	33	0	27	chr4_1015144
chr4	1015148	1015148	10.3	10.3%_29r	chr4	1015148	PlexA	EXON	0	26	3	0	29	0	25	0	0	25	3	29	0	25	chr4_1015148
chr4	1015150	1015150	13.8	13.8%_29r	chr4	1015150	PlexA	EXON	0	25	4	0	29	0	23	0	0	23	4	29	0	23	chr4_1015150
chr4	1015153	1015153	37	37.0%_27r	chr4	1015153	PlexA	EXON	0	17	10	0	27	0	19	0	0	19	10	27	0	19	chr4_1015153
chr4	1015181	1015181	32.6	32.6%_43r	chr4	1015181	PlexA	EXON	0	29	14	0	43	0	23	0	0	23	14	43	0	23	chr4_1015181
chr4	1015251	1015251	8.9	8.9%_56r	chr4	1015251	PlexA	EXON	0	51	5	0	56	0	18	0	0	18	5	56	0	18	chr4_1015251
chr4	1015291	1015291	39	39.0%_41r	chr4	1015291	PlexA	EXON	0	25	16	0	41	0	24	0	0	24	16	41	0	24	chr4_1015291
chr4	1015309	1015309	6.2	6.2%_48r	chr4	1015309	PlexA	EXON	0	45	3	0	48	0	32	0	0	32	3	48	0	32	chr4_1015309
chr4	1015443	1015443	7.3	7.3%_41r	chr4	1015443	PlexA	EXON	0	38	3	0	41	0	15	0	0	15	3	41	0	15	chr4_1015443
chr4	1015477	1015477	11.1	11.1%_36r	chr4	1015477	PlexA	EXON	0	32	4	0	36	0	13	0	0	13	4	36	0	13	chr4_1015477
chr4	1015487	1015487	50	50.0%_36r	chr4	1015487	PlexA	EXON	0	18	18	0	36	0	16	0	0	16	18	36	0	16	chr4_1015487
chr4	1015524	1015524	8.6	8.6%_58r	chr4	1015524	PlexA	EXON	0	53	5	0	58	0	19	0	0	19	5	58	0	19	chr4_1015524
chr4	1015527	1015527	7.4	7.4%_54r	chr4	1015527	PlexA	EXON	0	50	4	0	54	0	17	0	0	17	4	54	0	17	chr4_1015527
chr4	1015584	1015584	23.3	23.3%_43r	chr4	1015584	PlexA	EXON	0	33	10	0	43	0	10	0	0	10	10	43	0	10	chr4_1015584
chr4	1015603	1015603	15.2	15.2%_33r	chr4	1015603	PlexA	EXON	0	28	5	0	33	0	17	0	0	17	5	33	0	17	chr4_1015603
chr4	1016497	1016497	8.3	8.3%_24r	chr4	1016497	PlexA	EXON	0	22	2	0	24	0	13	0	0	13	2	24	0	13	chr4_1016497
chr4	1016543	1016543	6.2	6.2%_32r	chr4	1016543	PlexA	EXON	0	30	2	0	32	0	14	0	0	14	2	32	0	14	chr4_1016543
chr4	1016553	1016553	34.3	34.3%_35r	chr4	1016553	PlexA	EXON	0	23	12	0	35	0	21	0	0	21	12	35	0	21	chr4_1016553
chr4	1016591	1016591	6.1	6.1%_33r	chr4	1016591	PlexA	EXON	0	31	2	0	33	0	15	0	0	15	2	33	0	15	chr4_1016591
chr4	1016602	1016602	15.2	15.2%_33r	chr4	1016602	PlexA	EXON	0	28	5	0	33	0	20	0	0	20	5	33	0	20	chr4_1016602
chr4	1016605	1016605	6.2	6.2%_32r	chr4	1016605	PlexA	EXON	0	30	2	0	32	0	20	0	0	20	2	32	0	20	chr4_1016605
chr4	1016635	1016635	7.7	7.7%_26r	chr4	1016635	PlexA	EXON	0	24	2	0	26	0	16	0	0	16	2	26	0	16	chr4_1016635
chr4	1016657	1016657	6.9	6.9%_29r	chr4	1016657	PlexA	EXON	0	26	2	1	29	0	23	0	0	23	2	29	0	23	chr4_1016657
chr4	1016671	1016671	9.1	9.1%_22r	chr4	1016671	PlexA	EXON	0	20	2	0	22	0	18	0	0	18	2	22	0	18	chr4_1016671
chr4	1016815	1016815	15	15.0%_20r	chr4	1016815	PlexA	EXON	0	17	3	0	20	0	18	0	0	18	3	20	0	18	chr4_1016815
chr4	1017121	1017121	8.7	8.7%_23r	chr4	1017121	PlexA	EXON	0	21	2	0	23	0	14	0	0	14	2	23	0	14	chr4_1017121
chr4	1017211	1017211	14.3	14.3%_21r	chr4	1017211	PlexA	EXON	0	18	3	0	21	0	17	0	0	17	3	21	0	17	chr4_1017211
chr4	1017318	1017318	13.6	13.6%_22r	chr4	1017318	PlexA	EXON	0	19	3	0	22	0	17	0	0	17	3	22	0	17	chr4_1017318
chr4	1017390	1017390	12	12.0%_25r	chr4	1017390	PlexA	EXON	0	22	3	0	25	0	20	0	0	20	3	25	0	20	chr4_1017390
chr4	1017407	1017407	8.7	8.7%_23r	chr4	1017407	PlexA	EXON	0	21	2	0	23	0	29	0	0	29	2	23	0	29	chr4_1017407
chr4	1017877	1017877	40	40.0%_25r	chr4	1017877	PlexA	EXON	0	15	10	0	25	0	32	0	0	32	10	25	0	32	chr4_1017877
chr4	1017878	1017878	8	8.0%_25r	chr4	1017878	PlexA	EXON	0	23	2	0	25	0	33	0	0	33	2	25	0	33	chr4_1017878
chr4	1018068	1018068	8.3	8.3%_24r	chr4	1018068	PlexA	EXON	0	22	2	0	24	0	21	0	0	21	2	24	0	21	chr4_1018068
chr4	1018276	1018276	10	10.0%_20r	chr4	1018276	PlexA	EXON	0	18	2	0	20	0	13	0	0	13	2	20	0	13	chr4_1018276
chr4	1018376	1018376	7.1	7.1%_28r	chr4	1018376	PlexA	EXON	0	26	2	0	28	0	35	0	0	35	2	28	0	35	chr4_1018376
chr4	1018380	1018380	7.1	7.1%_28r	chr4	1018380	PlexA	EXON	0	26	2	0	28	0	32	0	0	32	2	28	0	32	chr4_1018380
chr4	1018388	1018388	19	19.0%_21r	chr4	1018388	PlexA	EXON	0	17	4	0	21	0	24	0	0	24	4	21	0	24	chr4_1018388
chr4	1018799	1018799	15	15.0%_20r	chr4	1018799	PlexA	EXON	0	17	3	0	20	0	17	0	0	17	3	20	0	17	chr4_1018799
chr4	1019211	1019211	16.7	16.7%_24r	chr4	1019211	PlexA	EXON	0	20	4	0	24	0	28	0	0	28	4	24	0	28	chr4_1019211
chr4	1019669	1019669	43.5	43.5%_23r	chr4	1019669	PlexA	EXON	0	13	10	0	23	0	11	0	0	11	10	23	0	11	chr4_1019669
chr4	1019737	1019737	7.7	7.7%_39r	chr4	1019737	PlexA	EXON	0	36	3	0	39	0	22	0	0	22	3	39	0	22	chr4_1019737
chr4	1019750	1019750	6.7	6.7%_30r	chr4	1019750	PlexA	EXON	0	28	2	0	30	0	16	0	0	16	2	30	0	16	chr4_1019750
chr4	1019973	1019973	15.2	15.2%_33r	chr4	1019973	PlexA	EXON	0	28	5	0	33	0	35	0	0	35	5	33	0	35	chr4_1019973
chr4	1022266	1022266	8.5	8.5%_47r	chr4	1022266	PlexA	EXON	0	43	4	0	47	0	31	0	0	31	4	47	0	31	chr4_1022266
chr4	1022398	1022398	25.4	25.4%_59r	chr4	1022398	PlexA	EXON	1	43	15	0	59	0	35	0	0	35	15	59	0	35	chr4_1022398
chr4	1022428	1022428	28.6	28.6%_49r	chr4	1022428	PlexA	EXON	0	35	14	0	49	0	45	0	0	45	14	49	0	45	chr4_1022428
chr4	1022439	1022439	8.3	8.3%_60r	chr4	1022439	PlexA	EXON	0	55	5	0	60	0	37	0	0	37	5	60	0	37	chr4_1022439
chr4	1022443	1022443	21.8	21.8%_55r	chr4	1022443	PlexA	EXON	0	43	12	0	55	0	30	0	0	30	12	55	0	30	chr4_1022443
chr4	1022461	1022461	9.4	9.4%_53r	chr4	1022461	PlexA	EXON	0	48	5	0	53	0	27	0	0	27	5	53	0	27	chr4_1022461
chr4	1022466	1022466	7.3	7.3%_55r	chr4	1022466	PlexA	EXON	0	51	4	0	55	0	27	0	0	27	4	55	0	27	chr4_1022466
chr4	1022489	1022489	6.2	6.2%_32r	chr4	1022489	PlexA	EXON	0	30	2	0	32	0	23	0	0	23	2	32	0	23	chr4_1022489
chr4	1022505	1022505	39.4	39.4%_33r	chr4	1022505	PlexA	EXON	0	20	13	0	33	0	24	0	0	24	13	33	0	24	chr4_1022505
chr4	1022572	1022572	36.2	36.2%_58r	chr4	1022572	PlexA	EXON	0	37	21	0	58	0	44	0	0	44	21	58	0	44	chr4_1022572
chr4	1022603	1022603	8.5	8.5%_71r	chr4	1022603	PlexA	EXON	0	65	6	0	71	0	48	0	0	48	6	71	0	48	chr4_1022603
chr4	1022610	1022610	15.5	15.5%_71r	chr4	1022610	PlexA	EXON	0	60	11	0	71	0	52	0	0	52	11	71	0	52	chr4_1022610
chr4	1022628	1022628	7.1	7.1%_56r	chr4	1022628	PlexA	EXON	0	52	4	0	56	0	56	0	0	56	4	56	0	56	chr4_1022628
chr4	1022635	1022635	7.7	7.7%_78r	chr4	1022635	PlexA	EXON	0	72	6	0	78	0	68	0	0	68	6	78	0	68	chr4_1022635
chr4	1022647	1022647	15.9	15.9%_69r	chr4	1022647	PlexA	EXON	0	58	11	0	69	0	53	0	0	53	11	69	0	53	chr4_1022647
chr4	1022673	1022673	7.1	7.1%_56r	chr4	1022673	PlexA	EXON	0	51	4	1	56	0	39	0	0	39	4	56	0	39	chr4_1022673
chr4	1022681	1022681	10	10.0%_50r	chr4	1022681	PlexA	EXON	0	45	5	0	50	0	40	0	0	40	5	50	0	40	chr4_1022681
chr4	1022765	1022765	11.4	11.4%_44r	chr4	1022765	PlexA	EXON	0	38	5	1	44	0	19	0	0	19	5	44	0	19	chr4_1022765
chr4	1022780	1022780	9.1	9.1%_44r	chr4	1022780	PlexA	EXON	0	40	4	0	44	0	19	0	0	19	4	44	0	19	chr4_1022780
chr4	1022817	1022817	24.1	24.1%_58r	chr4	1022817	PlexA	EXON	0	44	14	0	58	0	27	0	0	27	14	58	0	27	chr4_1022817
chr4	1022878	1022878	30.2	30.2%_63r	chr4	1022878	PlexA	EXON	0	44	19	0	63	0	45	0	0	45	19	63	0	45	chr4_1022878
chr4	1022911	1022911	8.3	8.3%_72r	chr4	1022911	PlexA	EXON	0	66	6	0	72	0	41	0	0	41	6	72	0	41	chr4_1022911
chr4	1022927	1022927	14.9	14.9%_67r	chr4	1022927	PlexA	EXON	0	57	10	0	67	1	31	0	0	32	10	67	0	32	chr4_1022927
chr4	1022928	1022928	7.5	7.5%_67r	chr4	1022928	PlexA	EXON	0	62	5	0	67	0	29	0	1	30	5	67	0	30	chr4_1022928
chr4	1022991	1022991	9.7	9.7%_72r	chr4	1022991	PlexA	EXON	0	65	7	0	72	0	65	0	0	65	7	72	0	65	chr4_1022991
chr4	1023001	1023001	6.6	6.6%_61r	chr4	1023001	PlexA	EXON	0	57	4	0	61	0	54	0	0	54	4	61	0	54	chr4_1023001
chr4	1023002	1023002	6.2	6.2%_65r	chr4	1023002	PlexA	EXON	1	60	4	0	65	0	54	0	0	54	4	65	0	54	chr4_1023002
chr4	1023030	1023030	21.7	21.7%_60r	chr4	1023030	PlexA	EXON	0	47	13	0	60	0	61	0	0	61	13	60	0	61	chr4_1023030
chr4	1023031	1023031	10	10.0%_60r	chr4	1023031	PlexA	EXON	0	54	6	0	60	0	63	0	0	63	6	60	0	63	chr4_1023031
chr4	1023060	1023060	18.3	18.3%_82r	chr4	1023060	PlexA	EXON	0	66	15	1	82	0	64	0	0	64	15	82	0	64	chr4_1023060
chr4	1023097	1023097	21.9	21.9%_64r	chr4	1023097	PlexA	EXON	0	50	14	0	64	0	43	0	0	43	14	64	0	43	chr4_1023097
chr4	1023131	1023131	7.5	7.5%_40r	chr4	1023131	PlexA	EXON	0	37	3	0	40	0	27	0	0	27	3	40	0	27	chr4_1023131
chr4	1023134	1023134	17.6	17.6%_34r	chr4	1023134	PlexA	EXON	0	28	6	0	34	0	23	0	0	23	6	34	0	23	chr4_1023134
chr4	1023153	1023153	9.6	9.6%_52r	chr4	1023153	PlexA	EXON	0	47	5	0	52	0	28	0	0	28	5	52	0	28	chr4_1023153
chr4	1023182	1023182	7.1	7.1%_70r	chr4	1023182	PlexA	EXON	0	65	5	0	70	0	36	0	0	36	5	70	0	36	chr4_1023182
chr4	1023192	1023192	19.7	19.7%_76r	chr4	1023192	PlexA	EXON	0	61	15	0	76	0	40	0	0	40	15	76	0	40	chr4_1023192
chr4	1023238	1023238	32	32.0%_75r	chr4	1023238	PlexA	EXON	0	51	24	0	75	0	44	0	0	44	24	75	0	44	chr4_1023238
chr4	1023273	1023273	6	6.0%_50r	chr4	1023273	PlexA	EXON	0	47	3	0	50	0	30	0	0	30	3	50	0	30	chr4_1023273
chr4	1023289	1023289	27.9	27.9%_43r	chr4	1023289	PlexA	EXON	0	31	12	0	43	0	22	0	0	22	12	43	0	22	chr4_1023289
chr4	1023334	1023334	11.5	11.5%_52r	chr4	1023334	PlexA	EXON	0	46	6	0	52	0	33	0	0	33	6	52	0	33	chr4_1023334
chr4	1023359	1023359	7.4	7.4%_68r	chr4	1023359	PlexA	EXON	0	63	5	0	68	0	43	0	0	43	5	68	0	43	chr4_1023359
chr4	1023387	1023387	8.5	8.5%_59r	chr4	1023387	PlexA	EXON	1	53	5	0	59	1	39	0	0	40	5	59	0	40	chr4_1023387
chr4	1023388	1023388	15.3	15.3%_59r	chr4	1023388	PlexA	EXON	0	50	9	0	59	0	42	0	0	42	9	59	0	42	chr4_1023388
chr4	1023456	1023456	20.3	20.3%_69r	chr4	1023456	PlexA	EXON	0	55	14	0	69	0	44	0	0	44	14	69	0	44	chr4_1023456
chr4	1023467	1023467	6.5	6.5%_62r	chr4	1023467	PlexA	EXON	0	58	4	0	62	0	43	0	0	43	4	62	0	43	chr4_1023467
chr4	1023523	1023523	6.6	6.6%_61r	chr4	1023523	PlexA	EXON	0	57	4	0	61	0	32	0	0	32	4	61	0	32	chr4_1023523
chr4	1023540	1023540	8	8.0%_50r	chr4	1023540	PlexA	EXON	0	46	4	0	50	0	25	0	0	25	4	50	0	25	chr4_1023540
chr4	1023566	1023566	10.7	10.7%_28r	chr4	1023566	PlexA	EXON	0	25	3	0	28	0	14	0	0	14	3	28	0	14	chr4_1023566
chr4	1023584	1023584	8	8.0%_25r	chr4	1023584	PlexA	EXON	0	23	2	0	25	0	21	0	0	21	2	25	0	21	chr4_1023584
chr4	1023589	1023589	22.2	22.2%_27r	chr4	1023589	PlexA	EXON	0	21	6	0	27	0	23	0	0	23	6	27	0	23	chr4_1023589
chr4	1023604	1023604	6.7	6.7%_30r	chr4	1023604	PlexA	EXON	0	28	2	0	30	0	18	0	0	18	2	30	0	18	chr4_1023604
chr4	1023638	1023638	8.6	8.6%_58r	chr4	1023638	PlexA	EXON	0	53	5	0	58	0	32	0	0	32	5	58	0	32	chr4_1023638
chr4	1023656	1023656	9.5	9.5%_63r	chr4	1023656	PlexA	EXON	0	56	6	1	63	0	42	0	0	42	6	63	0	42	chr4_1023656
chr4	1027057	1027057	9.4	9.4%_32r	chr4	1027057	PlexA	EXON	0	29	3	0	32	0	24	0	0	24	3	32	0	24	chr4_1027057
chr4	1027059	1027059	18.2	18.2%_33r	chr4	1027059	PlexA	EXON	0	27	6	0	33	0	24	0	0	24	6	33	0	24	chr4_1027059
chr4	649853	649853	16	16.0%_50r	chr4	649853	gw	EXON	0	42	8	0	50	0	16	0	0	16	8	50	0	16	chr4_649853
chr4	650046	650046	6.3	6.3%_79r	chr4	650046	gw	EXON	0	74	5	0	79	0	40	0	0	40	5	79	0	40	chr4_650046
chr4	650089	650089	6.4	6.4%_47r	chr4	650089	gw	EXON	0	44	3	0	47	0	21	0	0	21	3	47	0	21	chr4_650089
chr4	650103	650103	13.8	13.8%_58r	chr4	650103	gw	EXON	0	50	8	0	58	0	24	0	0	24	8	58	0	24	chr4_650103
chr4	650121	650121	8.4	8.4%_83r	chr4	650121	gw	EXON	0	76	7	0	83	0	43	0	0	43	7	83	0	43	chr4_650121
chr4	650123	650123	24.7	24.7%_85r	chr4	650123	gw	EXON	0	64	21	0	85	0	42	0	0	42	21	85	0	42	chr4_650123
chr4	650142	650142	16.5	16.5%_85r	chr4	650142	gw	EXON	0	71	14	0	85	0	47	0	0	47	14	85	0	47	chr4_650142
chr4	650181	650181	6.5	6.5%_107r	chr4	650181	gw	EXON	0	100	7	0	107	1	48	0	0	49	7	107	0	49	chr4_650181
chr4	650211	650211	9.3	9.3%_86r	chr4	650211	gw	EXON	0	78	8	0	86	0	37	0	0	37	8	86	0	37	chr4_650211
chr4	650216	650216	21.1	21.1%_76r	chr4	650216	gw	EXON	0	60	16	0	76	0	28	0	0	28	16	76	0	28	chr4_650216
chr4	650243	650243	10.8	10.8%_65r	chr4	650243	gw	EXON	0	58	7	0	65	0	32	0	0	32	7	65	0	32	chr4_650243
chr4	650255	650255	8.7	8.7%_69r	chr4	650255	gw	EXON	0	63	6	0	69	0	44	0	0	44	6	69	0	44	chr4_650255
chr4	650276	650276	42.3	42.3%_97r	chr4	650276	gw	EXON	0	56	41	0	97	0	53	0	0	53	41	97	0	53	chr4_650276
chr4	650352	650352	14.8	14.8%_54r	chr4	650352	gw	EXON	0	46	8	0	54	0	27	0	0	27	8	54	0	27	chr4_650352
chr4	650355	650355	7.1	7.1%_56r	chr4	650355	gw	EXON	0	52	4	0	56	0	29	0	0	29	4	56	0	29	chr4_650355
chr4	650356	650356	18.2	18.2%_55r	chr4	650356	gw	EXON	0	45	10	0	55	0	29	0	0	29	10	55	0	29	chr4_650356
chr4	650357	650357	18.2	18.2%_55r	chr4	650357	gw	EXON	0	45	10	0	55	0	29	0	0	29	10	55	0	29	chr4_650357
chr4	650430	650430	8.7	8.7%_92r	chr4	650430	gw	EXON	0	84	8	0	92	0	34	0	0	34	8	92	0	34	chr4_650430
chr4	650514	650514	10.2	10.2%_127r	chr4	650514	gw	EXON	0	114	13	0	127	0	52	0	0	52	13	127	0	52	chr4_650514
chr4	650520	650520	12.6	12.6%_95r	chr4	650520	gw	EXON	1	82	12	0	95	0	40	0	0	40	12	95	0	40	chr4_650520
chr4	650526	650526	39.1	39.1%_92r	chr4	650526	gw	EXON	0	56	36	0	92	0	38	0	0	38	36	92	0	38	chr4_650526
chr4	650604	650604	16.1	16.1%_31r	chr4	650604	gw	EXON	0	26	5	0	31	0	20	0	0	20	5	31	0	20	chr4_650604
chr4	650630	650630	11.8	11.8%_34r	chr4	650630	gw	EXON	0	30	4	0	34	0	31	0	1	32	4	34	0	32	chr4_650630
chr4	650640	650640	8.7	8.7%_23r	chr4	650640	gw	EXON	0	21	2	0	23	0	21	0	1	22	2	23	0	22	chr4_650640
chr4	650643	650643	8.7	8.7%_23r	chr4	650643	gw	EXON	0	21	2	0	23	0	22	0	0	22	2	23	0	22	chr4_650643
chr4	650793	650793	20	20.0%_65r	chr4	650793	gw	EXON	1	51	13	0	65	0	44	0	0	44	13	65	0	44	chr4_650793
chr4	650850	650850	10.7	10.7%_56r	chr4	650850	gw	EXON	0	50	6	0	56	0	27	0	0	27	6	56	0	27	chr4_650850
chr4	651018	651018	22	22.0%_100r	chr4	651018	gw	EXON	0	78	22	0	100	0	43	0	1	44	22	100	0	44	chr4_651018
chr4	652457	652457	8	8.0%_50r	chr4	652457	gw	EXON	0	46	4	0	50	0	24	0	0	24	4	50	0	24	chr4_652457
chr4	652565	652565	6.5	6.5%_77r	chr4	652565	gw	EXON	0	72	5	0	77	0	33	0	0	33	5	77	0	33	chr4_652565
[truncated: 84,137 more rows]

## Sheet: 3-Hrp48-ADAR final
chromosome	coordinate	coordinate	percentage editing	percentage editing/read covering	gene	location	ID
[truncated: 27,409 more rows]

[truncated: 10 more sheets: 4-Hrp48-APOBEC replicate 1, 5-Hrp48-APOBEC replicate 2, 6-Hrp48-APOBEC final, 7-Thor-ADAR replicate 1, 8-Thor-ADAR replicate 2, 9- Thor-ADAR final, 10-Thor-Apobec replicate 1, 11-Thor-APOBEC replicate 2, 12-Thor-Apobec-C2T-13, rEADME]
